# Supplementary material
Source: PubMed Central journal article supplement (PMC2870931)
Supplement: pr900927y_si_001.pdf [file pr900927y_si_001.pdf]

## Supplemental Figures and Tables

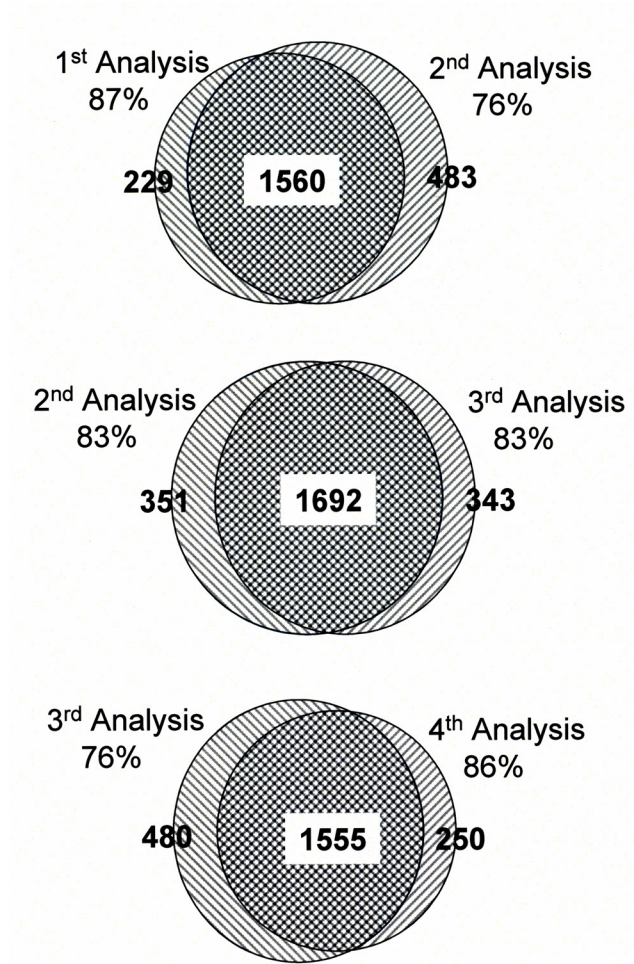

**Supplemental Figure 1.** Reproducibility along repetitive analyses of the 2-D samples. In each Venn diagram, common protein counts and unique protein counts were labeled. Percentages illustrate the proportion of proteins identified in each analysis that were common with the other analysis being compared. Only proteins identified by two or more peptides were counted.

**Supplemental Table 1.** Identification of different closely related isoforms in a protein family by the 2-D/repetitive and 3-D methods.

| 2-D Protein                   |                                |                                | 3-D Protein      |                                | # Common Peptides | Sequence Identity (%) |
|-------------------------------|--------------------------------|--------------------------------|------------------|--------------------------------|-------------------|-----------------------|
| Protein Entry ID <sup>a</sup> | # Unique Peptides <sup>b</sup> | Unique to Dataset <sup>c</sup> | Protein Entry ID | # Unique Peptides <sup>b</sup> |                   |                       |
| Q5U0I1                        | 1                              | 0                              | Q15907           | 1                              | 10                | 99.54                 |
|                               |                                |                                | Q6FHR0           |                                |                   | 99.08                 |
| Q5VU66 <sup>d</sup>           | 1                              | 0                              | Q6QA25           | 3                              | 12                | 93.95                 |
| UPI0000D61FF9 <sup>d</sup>    |                                |                                | UPI000020489E    |                                |                   | 93.55                 |
| Q4LE56                        | 8                              | 7                              | UPI0000F0A52B    | 6                              | 19                | 94.44                 |
| Q6IAH3                        | 1                              | 0                              | Q9UBQ0           | 1                              | 4                 | 97.31                 |
| UPI000045667B                 |                                |                                |                  |                                |                   | 97.84                 |
| Q02952                        | 3                              | 1                              | Q4LE68           | 15                             | 43                | 99.49                 |
| Q02952-2                      |                                |                                |                  |                                |                   | 98.99                 |
|                               |                                |                                | UPI000052D444    |                                |                   | 98.48                 |
| Q59H74                        | 2                              | 1                              | P13612           | 5                              | 4                 | 98.48                 |
|                               |                                |                                | UPI0000456EB4    |                                |                   | 98.48                 |
|                               |                                |                                | Q53GR7           |                                |                   | 98.07                 |
| Q8HXW2                        | 2                              | 1                              | Q9UJS0           | 6                              | 5                 | 98.37                 |
|                               |                                |                                | Q546F9           |                                |                   | 98.37                 |
| Q5U0I7                        |                                |                                |                  |                                |                   | 97.09                 |
| P62714                        | 2                              | 1                              | P67775           | 5                              | 8                 | 97.41                 |
| Q8WZ56                        |                                |                                |                  |                                |                   | 97.73                 |
| UPI00004576CB                 | 2                              | 1                              | UPI0000E9B14C    | 5                              | 4                 | 81.98                 |
| Q99475                        | 3                              | 3                              | Q6FI31           | 6                              | 15                | 99.8                  |
| UPI0000D6223A                 |                                |                                |                  |                                |                   | 99.8                  |
| P11413-2                      | 2                              | 1                              | Q2Q9H2           | 4                              | 22                | 99.79                 |

*a* These 11 proteins were identified by  $\geq 3$  peptides in the 2-D/repetitive runs dataset but were not identified in the 3-D dataset. However, in all cases, highly homologous proteins with many common peptides were identified in the 3-D dataset due to database redundancy and variations in building consensus protein lists in different datasets.

*b* Number of peptides not shared with the corresponding most homologous protein in the other dataset.

*c* Most peptides that were apparently “unique” to the 2-D/repetitive-run dataset actually could be found assigned to other homologous proteins in the 3-D dataset, indicating further variations in assignments of peptides among multiple proteins in a protein family.

*d* These two proteins have a sequence identity of 98.7%.

**Supplemental Table 2.** Protein List of 2-D Dataset

uniref100 database (May, 2007); DTA  
 At least two unique peptide sequences

| No. | Accession Number | Unique Peptide Count | Spectrum Count | Sequence Coverage (%) | Length | MolWt  | pI  | Descriptive Name                                                                                                                                                                                                                                              |
|-----|------------------|----------------------|----------------|-----------------------|--------|--------|-----|---------------------------------------------------------------------------------------------------------------------------------------------------------------------------------------------------------------------------------------------------------------|
| 1   | Q15149           | 236                  | 3840           | 55.9                  | 4684   | 531738 | 5.9 | Plectin-1                                                                                                                                                                                                                                                     |
| 1   | Q6S380           | 236                  | 3840           | 55.9                  | 4684   | 531796 | 6   | Plectin 6                                                                                                                                                                                                                                                     |
| 2   | UPI00004EC29C    | 183                  | 4206           | 37                    | 5890   | 629114 | 6.1 | AHNAK nucleoprotein isoform 1                                                                                                                                                                                                                                 |
| 3   | Q5HY53           | 103                  | 1383           | 54                    | 2639   | 280016 | 6   | Filamin A, alpha                                                                                                                                                                                                                                              |
| 3   | P21333           | 103                  | 1383           | 53.9                  | 2647   | 280737 | 6.1 | Filamin-A                                                                                                                                                                                                                                                     |
| 4   | P78527           | 102                  | 1059           | 28.1                  | 4128   | 469093 | 7.1 | DNA-dependent protein kinase catalytic subunit                                                                                                                                                                                                                |
| 4   | UPI000045790C    | 102                  | 1059           | 28.1                  | 4127   | 468980 | 7.1 | DNA-dependent protein kinase catalytic subunit (EC 2.7.11.1) (DNA-PK catalytic subunit) (DNA-PKcs) (DNPk1) (p460).                                                                                                                                            |
| 5   | P35579           | 101                  | 1639           | 55.5                  | 1960   | 226530 | 5.6 | Myosin-9                                                                                                                                                                                                                                                      |
| 6   | Q14204           | 98                   | 561            | 26.3                  | 4646   | 532412 | 6.4 | Dynein heavy chain, cytosolic                                                                                                                                                                                                                                 |
| 6   | UPI000021D4C1    | 98                   | 561            | 26.3                  | 4647   | 532371 | 6.4 | Dynein heavy chain, cytosolic (DYHC) (Cytoplasmic dynein heavy chain 1) (DHC1) (Dynein heavy chain 1, cytoplasmic 1).                                                                                                                                         |
| 7   | Q13813           | 94                   | 728            | 43.6                  | 2472   | 284538 | 5.3 | Spectrin alpha chain, brain                                                                                                                                                                                                                                   |
| 7   | UPI00004577B5    | 94                   | 728            | 43.5                  | 2480   | 285480 | 5.4 | Spectrin alpha chain, brain (Spectrin, non-erythroid alpha chain) (Alpha-II spectrin) (Fodrin alpha chain).                                                                                                                                                   |
| 7   | Q13813-2         | 94                   | 728            | 43.5                  | 2477   | 285093 | 5.4 | Isoform 2 of Q13813                                                                                                                                                                                                                                           |
| 7   | UPI0000D61917    | 94                   | 728            | 43.4                  | 2485   | 286012 | 5.4 | Spectrin alpha chain, brain (Spectrin, non-erythroid alpha chain) (Alpha-II spectrin) (Fodrin alpha chain).                                                                                                                                                   |
| 8   | Q53R99           | 84                   | 716            | 45.1                  | 2314   | 268714 | 5.6 | Hypothetical protein SPTBN1                                                                                                                                                                                                                                   |
| 8   | Q01082           | 84                   | 716            | 44.2                  | 2364   | 274608 | 5.6 | Spectrin beta chain, brain 1                                                                                                                                                                                                                                  |
| 9   | Q9Y490           | 79                   | 887            | 44.8                  | 2541   | 269765 | 6.1 | Talin-1                                                                                                                                                                                                                                                       |
| 9   | UPI0000167B7F    | 79                   | 887            | 44.8                  | 2541   | 269665 | 6   | talin 1                                                                                                                                                                                                                                                       |
| 10  | Q00610-2         | 75                   | 1005           | 59.6                  | 1639   | 187889 | 5.7 | Isoform 2 of Q00610                                                                                                                                                                                                                                           |
| 10  | Q00610           | 75                   | 1005           | 58.3                  | 1675   | 191613 | 5.7 | Clathrin heavy chain 1                                                                                                                                                                                                                                        |
| 11  | Q5SYZ6           | 73                   | 1536           | 53.7                  | 1621   | 177438 | 4.4 | Nestin                                                                                                                                                                                                                                                        |
| 12  | O75369-2         | 67                   | 436            | 35.3                  | 2578   | 275697 | 5.8 | Isoform 2 of O75369                                                                                                                                                                                                                                           |
| 12  | Q60FE7           | 67                   | 436            | 35.1                  | 2591   | 276936 | 5.7 | Filamin B                                                                                                                                                                                                                                                     |
| 12  | O75369           | 67                   | 436            | 35                    | 2602   | 278193 | 5.7 | Filamin-B                                                                                                                                                                                                                                                     |
| 12  | UPI00001AEC01    | 67                   | 436            | 35                    | 2602   | 278162 | 5.7 | filamin B, beta (actin binding protein 278)                                                                                                                                                                                                                   |
| 13  | P35580           | 61                   | 297            | 46.6                  | 1976   | 228937 | 5.5 | Myosin-10                                                                                                                                                                                                                                                     |
| 13  | Q149N3           | 61                   | 297            | 46.6                  | 1976   | 228997 | 5.5 | Myosin, heavy chain 10, non-muscle                                                                                                                                                                                                                            |
| 13  | P35580-3         | 61                   | 297            | 46.1                  | 1997   | 231307 | 5.5 | Isoform 3 of P35580                                                                                                                                                                                                                                           |
| 13  | Q4LE45           | 61                   | 297            | 45.6                  | 2018   | 233847 | 5.6 | MYH10 variant protein                                                                                                                                                                                                                                         |
| 14  | Q9NZM1-6         | 59                   | 361            | 36.4                  | 2048   | 233474 | 6.2 | Isoform 6 of Q9NZM1                                                                                                                                                                                                                                           |
| 14  | Q9NZM1           | 59                   | 361            | 36.2                  | 2061   | 234706 | 6.2 | Myoferlin                                                                                                                                                                                                                                                     |
| 15  | O43707           | 55                   | 1008           | 67.8                  | 911    | 104854 | 5.4 | Alpha-actinin-4                                                                                                                                                                                                                                               |
| 16  | Q4LE83           | 54                   | 412            | 28.3                  | 2548   | 277368 | 6.6 | FASN variant protein                                                                                                                                                                                                                                          |
| 16  | UPI0000D623B2    | 54                   | 412            | 28.3                  | 2548   | 277428 | 6.6 | Fatty acid synthase (EC 2.3.1.85) [Includes: [Acyl-carrier-protein] S-acetyltransferase (EC 2.3.1.38); [Acyl-carrier-protein] S-malonyltransferase (EC 2.3.1.39); 3-oxoacyl-[acyl-carrier-protein] synthase (EC 2.3.1.41); 3-oxoacyl-[acyl-carrier-protein] r |

| No. | Accession Number | Unique Peptide Count | Spectrum Count | Sequence Coverage (%) | Length | MolWt  | pI  | Descriptive Name                                                                                                                                                              |
|-----|------------------|----------------------|----------------|-----------------------|--------|--------|-----|-------------------------------------------------------------------------------------------------------------------------------------------------------------------------------|
| 17  | P46940           | 50                   | 360            | 39.6                  | 1657   | 189251 | 6.5 | Ras GTPase-activating-like protein IQGAP1                                                                                                                                     |
| 18  | Q6ZUD8           | 49                   | 342            | 44                    | 1394   | 157961 | 6.1 | CDNA FLJ43793 fis, clone TESTI4000014, highly similar to 130 kDa leucine-rich protein                                                                                         |
| 19  | Q9P2E9           | 49                   | 587            | 40.6                  | 1410   | 152472 | 8.6 | Ribosome-binding protein 1                                                                                                                                                    |
| 20  | P18206-2         | 48                   | 231            | 52.5                  | 1066   | 116722 | 6.1 | Isoform 1 of P18206                                                                                                                                                           |
| 20  | P18206           | 48                   | 231            | 49.4                  | 1134   | 123799 | 5.7 | Vinculin                                                                                                                                                                      |
| 21  | O75643           | 48                   | 209            | 27.1                  | 2136   | 244505 | 6.1 | U5 small nuclear ribonucleoprotein 200 kDa helicase                                                                                                                           |
| 22  | Q02952-2         | 46                   | 250            | 37.7                  | 1683   | 181646 | 4.4 | Isoform 2 of Q02952                                                                                                                                                           |
| 22  | Q02952           | 46                   | 250            | 35.7                  | 1781   | 191438 | 4.4 | A-kinase anchor protein 12                                                                                                                                                    |
| 23  | Q5T201           | 44                   | 188            | 43.7                  | 1224   | 138345 | 7.7 | Coatmer protein complex, subunit alpha                                                                                                                                        |
| 24  | UPI000014054E    | 42                   | 191            | 29.5                  | 1600   | 175618 | 5.3 | Eukaryotic translation initiation factor 4 gamma 1 (eIF-4-gamma 1) (eIF-4G1) (eIF-4G 1) (p220).                                                                               |
| 25  | P46821           | 42                   | 215            | 22.6                  | 2468   | 270618 | 4.8 | Microtubule-associated protein 1B (MAP 1B) [Contains: MAP1 light chain LC1]                                                                                                   |
| 25  | UPI000013E382    | 42                   | 215            | 22.6                  | 2468   | 270632 | 4.8 | Microtubule-associated protein 1B (MAP 1B) [Contains: MAP1 light chain LC1].                                                                                                  |
| 26  | Q5CAQ5           | 41                   | 777            | 55.6                  | 802    | 92340  | 4.9 | Tumor rejection antigen (Gp96) 1                                                                                                                                              |
| 26  | P14625           | 41                   | 777            | 55.5                  | 803    | 92469  | 4.8 | Endoplasmic precursor                                                                                                                                                         |
| 27  | P13639           | 40                   | 827            | 58.3                  | 858    | 95338  | 6.8 | Elongation factor 2                                                                                                                                                           |
| 28  | Q08211           | 40                   | 410            | 36.9                  | 1270   | 140958 | 6.8 | ATP-dependent RNA helicase A                                                                                                                                                  |
| 28  | UPI0000D62059    | 40                   | 410            | 35.7                  | 1315   | 146474 | 6.9 | ATP-dependent RNA helicase A (EC 3.6.1.-) (Nuclear DNA helicase II) (NDH II) (DEAH box protein 9).                                                                            |
| 29  | P02545           | 39                   | 793            | 58.3                  | 664    | 74140  | 7   | Lamin-A/C                                                                                                                                                                     |
| 29  | Q5I6Y6           | 39                   | 793            | 58.3                  | 664    | 74082  | 7.2 | Lamin A/C transcript variant 1                                                                                                                                                |
| 30  | P11216           | 39                   | 444            | 58.2                  | 843    | 96696  | 6.9 | Glycogen phosphorylase, brain form                                                                                                                                            |
| 31  | P33176           | 39                   | 125            | 51.2                  | 963    | 109685 | 6.5 | Kinesin heavy chain                                                                                                                                                           |
| 32  | Q00341           | 39                   | 188            | 40.9                  | 1268   | 141439 | 6.9 | Vigilin                                                                                                                                                                       |
| 33  | Q9NYU2           | 39                   | 155            | 31.6                  | 1531   | 174976 | 5.6 | UDP-glucose:glycoprotein glucosyltransferase 1 precursor                                                                                                                      |
| 33  | UPI0000D61230    | 39                   | 155            | 31.1                  | 1557   | 177373 | 5.6 | UDP-glucose:glycoprotein glucosyltransferase 1 precursor (EC 2.4.1.-) (UDP-glucose ceramide glucosyltransferase-like 1) (UDP-- Glc:glycoprotein glucosyltransferase) (HUGT1). |
| 33  | UPI00000707D8    | 39                   | 155            | 31.1                  | 1555   | 177189 | 5.6 | UDP-glucose ceramide glucosyltransferase-like 1 isoform 1                                                                                                                     |
| 34  | P08670           | 38                   | 4318           | 74                    | 466    | 53652  | 5.1 | Vimentin                                                                                                                                                                      |
| 35  | Q7KZF4           | 37                   | 354            | 49.3                  | 910    | 101997 | 7.2 | Staphylococcal nuclease domain-containing protein 1                                                                                                                           |
| 35  | Q59FF0           | 37                   | 354            | 46.6                  | 964    | 107433 | 7.5 | EBNA-2 co-activator variant                                                                                                                                                   |
| 36  | Q14152           | 36                   | 142            | 28                    | 1382   | 166569 | 6.8 | Eukaryotic translation initiation factor 3 subunit 10                                                                                                                         |
| 36  | Q24JU4           | 36                   | 142            | 28                    | 1382   | 166470 | 6.7 | Eukaryotic translation initiation factor 3, subunit 10 theta, 150/170kDa                                                                                                      |

| No. | Accession Number | Unique Peptide Count | Spectrum Count | Sequence Coverage (%) | Length | MolWt  | pI  | Descriptive Name                                                                                                                                                                                                                                                |
|-----|------------------|----------------------|----------------|-----------------------|--------|--------|-----|-----------------------------------------------------------------------------------------------------------------------------------------------------------------------------------------------------------------------------------------------------------------|
| 37  | P14618           | 35                   | 1202           | 68.4                  | 531    | 57937  | 7.8 | Pyruvate kinase isozymes M1/M2                                                                                                                                                                                                                                  |
| 37  | Q53GK4           | 35                   | 1202           | 68.4                  | 531    | 57984  | 8.1 | Pyruvate kinase 3 isoform 1 variant                                                                                                                                                                                                                             |
| 38  | Q5CAQ7           | 34                   | 610            | 43                    | 854    | 98113  | 5.2 | Heat shock protein HSP 90-alpha 2                                                                                                                                                                                                                               |
| 39  | P05023           | 34                   | 411            | 37.6                  | 1023   | 112896 | 5.5 | Sodium/potassium-transporting ATPase alpha-1 chain precursor (EC 3.6.3.9) (Sodium pump 1) (Na(+)/K(+) ATPase 1)                                                                                                                                                 |
| 40  | Q86UP2-2         | 34                   | 143            | 28.5                  | 1300   | 149610 | 5.7 | Isoform 2 of Q86UP2                                                                                                                                                                                                                                             |
| 40  | Q86UP2           | 34                   | 143            | 27.3                  | 1357   | 156275 | 5.6 | Kinectin                                                                                                                                                                                                                                                        |
| 41  | P11717           | 32                   | 111            | 13.3                  | 2491   | 274274 | 5.9 | Cation-independent mannose-6-phosphate receptor precursor                                                                                                                                                                                                       |
| 41  | UPI0000072478    | 32                   | 111            | 13.3                  | 2491   | 274373 | 5.9 | Cation-independent mannose-6-phosphate receptor precursor (CI Man-6-P receptor) (CI-MPR) (M6PR) (Insulin-like growth factor 2 receptor) (Insulin-like growth factor II receptor) (IGF-II receptor) (M6P/IGF2 receptor) (M6P/IGF2R) (300 kDa mannose 6-phosphate |
| 42  | P10809           | 31                   | 1321           | 68.9                  | 573    | 61055  | 5.9 | 60 kDa heat shock protein, mitochondrial precursor                                                                                                                                                                                                              |
| 42  | UPI000013D97A    | 31                   | 1321           | 68.7                  | 575    | 61213  | 5.9 | 60 kDa heat shock protein, mitochondrial precursor (Hsp60) (60 kDa chaperonin) (CPN60) (Heat shock protein 60) (HSP-60) (Mitochondrial matrix protein P1) (P60 lymphocyte protein) (HuCHA60).                                                                   |
| 43  | P50990           | 31                   | 166            | 63.7                  | 548    | 59621  | 5.6 | T-complex protein 1 subunit theta                                                                                                                                                                                                                               |
| 44  | UPI000004D059    | 31                   | 135            | 37.6                  | 1048   | 116052 | 5.7 | integrin alpha-V precursor                                                                                                                                                                                                                                      |
| 45  | UPI0000225CC0    | 31                   | 131            | 35.6                  | 1091   | 119772 | 7.3 | ATP citrate lyase isoform 2                                                                                                                                                                                                                                     |
| 45  | P53396           | 31                   | 131            | 35.2                  | 1101   | 120839 | 7.3 | ATP-citrate synthase (EC 2.3.3.8) (ATP-citrate (pro-S-)-lyase)                                                                                                                                                                                                  |
| 46  | Q86VP6           | 31                   | 118            | 32.4                  | 1230   | 136375 | 5.8 | Cullin-associated NEDD8-dissociated protein 1                                                                                                                                                                                                                   |
| 47  | P12814           | 30                   | 300            | 63                    | 892    | 103058 | 5.4 | Alpha-actinin-1                                                                                                                                                                                                                                                 |
| 48  | P11142           | 30                   | 613            | 53.9                  | 646    | 70898  | 5.5 | Heat shock cognate 71 kDa protein                                                                                                                                                                                                                               |
| 49  | P13667           | 30                   | 410            | 51.3                  | 645    | 72933  | 5.1 | Protein disulfide-isomerase A4 precursor                                                                                                                                                                                                                        |
| 50  | P55072           | 30                   | 444            | 50.6                  | 806    | 89322  | 5.3 | Transitional endoplasmic reticulum ATPase (TER ATPase) (15S Mg(2+)- ATPase p97 subunit)                                                                                                                                                                         |
| 50  | Q0V924           | 30                   | 444            | 50.6                  | 806    | 89344  | 5.3 | Valosin-containing protein                                                                                                                                                                                                                                      |
| 51  | Q9Y4L1           | 30                   | 255            | 40.4                  | 999    | 111335 | 5.2 | 150 kDa oxygen-regulated protein precursor                                                                                                                                                                                                                      |
| 52  | P16615-2         | 30                   | 383            | 38.8                  | 997    | 109691 | 5.4 | Isoform SERCA2A of P16615                                                                                                                                                                                                                                       |

| No. | Accession Number | Unique Peptide Count | Spectrum Count | Sequence Coverage (%) | Length | MolWt  | pI  | Descriptive Name                                                                                                                                                                                                                                               |
|-----|------------------|----------------------|----------------|-----------------------|--------|--------|-----|----------------------------------------------------------------------------------------------------------------------------------------------------------------------------------------------------------------------------------------------------------------|
| 52  | P16615           | 30                   | 383            | 37.1                  | 1042   | 114757 | 5.3 | Sarcoplasmic/endoplasmic reticulum calcium ATPase 2 (EC 3.6.3.8) (Calcium pump 2) (SERCA2) (SR Ca(2+)-ATPase 2) (Calcium-transporting ATPase sarcoplasmic reticulum type, slow twitch skeletal muscle isoform) (Endoplasmic reticulum class 1/2 Ca(2+) ATPase) |
| 53  | P27816           | 30                   | 149            | 33.5                  | 1152   | 121019 | 5.4 | Microtubule-associated protein 4                                                                                                                                                                                                                               |
| 53  | UPI000020A6A4    | 30                   | 149            | 33.5                  | 1152   | 121005 | 5.4 | microtubule-associated protein 4 isoform 1                                                                                                                                                                                                                     |
| 53  | Q59FT2           | 30                   | 149            | 33.2                  | 1163   | 122941 | 6.7 | Microtubule-associated protein 4 isoform 1 variant                                                                                                                                                                                                             |
| 54  | Q6UVK1           | 30                   | 197            | 17.1                  | 2322   | 250494 | 5.5 | Chondroitin sulfate proteoglycan 4 precursor                                                                                                                                                                                                                   |
| 54  | UPI00001AEEB6    | 30                   | 197            | 17.1                  | 2322   | 250534 | 5.5 | chondroitin sulfate proteoglycan 4                                                                                                                                                                                                                             |
| 55  | P12270           | 30                   | 109            | 14.7                  | 2349   | 265598 | 5.1 | Nucleoprotein TPR                                                                                                                                                                                                                                              |
| 55  | Q5SWY0           | 30                   | 109            | 14.6                  | 2363   | 267290 | 5   | Translocated promoter region                                                                                                                                                                                                                                   |
| 56  | Q2TAL4           | 29                   | 157            | 46.5                  | 840    | 94331  | 5.2 | Heat shock 70kDa protein 4                                                                                                                                                                                                                                     |
| 57  | P22314           | 29                   | 132            | 41.9                  | 1058   | 117849 | 5.8 | Ubiquitin-activating enzyme E1                                                                                                                                                                                                                                 |
| 58  | A0AVA9           | 29                   | 123            | 25                    | 1512   | 170590 | 7.3 | EPRS protein                                                                                                                                                                                                                                                   |
| 58  | Q5H9S5           | 29                   | 123            | 25                    | 1512   | 170643 | 7.2 | Hypothetical protein DKFZp313B047                                                                                                                                                                                                                              |
| 59  | P27824           | 28                   | 603            | 47.3                  | 592    | 67568  | 4.6 | Calnexin precursor                                                                                                                                                                                                                                             |
| 60  | P26038           | 28                   | 315            | 46.4                  | 577    | 67820  | 6.4 | Moesin                                                                                                                                                                                                                                                         |
| 61  | Q4LE33           | 28                   | 153            | 17                    | 2233   | 244402 | 4.9 | TNC variant protein                                                                                                                                                                                                                                            |
| 62  | P07237           | 27                   | 259            | 60.4                  | 508    | 57116  | 4.9 | Protein disulfide-isomerase precursor                                                                                                                                                                                                                          |
| 63  | Q16658           | 27                   | 267            | 58.4                  | 493    | 54530  | 7.2 | Fascin                                                                                                                                                                                                                                                         |
| 63  | UPI0000D61BF6    | 27                   | 267            | 58.4                  | 493    | 54640  | 7.8 | Fascin (Singed-like protein) (55 kDa actin-bundling protein) (p55).                                                                                                                                                                                            |
| 63  | Q96IH1           | 27                   | 267            | 57.6                  | 500    | 55136  | 7.2 | FSCN1 protein                                                                                                                                                                                                                                                  |
| 64  | P11021           | 27                   | 368            | 47.4                  | 654    | 72333  | 5.2 | 78 kDa glucose-regulated protein precursor (GRP 78) (Heat shock 70 kDa protein 5) (Immunoglobulin heavy chain-binding protein) (BiP) (Endoplasmic reticulum luminal Ca(2+)-binding protein grp78)                                                              |
| 65  | Q92598-2         | 27                   | 116            | 42.9                  | 814    | 92116  | 5.6 | Isoform Beta of Q92598                                                                                                                                                                                                                                         |
| 65  | Q92598           | 27                   | 116            | 40.7                  | 858    | 96865  | 5.4 | Heat-shock protein 105 kDa                                                                                                                                                                                                                                     |
| 66  | Q00839-2         | 27                   | 216            | 35.6                  | 806    | 88980  | 5.8 | Isoform Short of Q00839                                                                                                                                                                                                                                        |
| 66  | Q00839           | 27                   | 216            | 34.8                  | 824    | 90514  | 6   | Heterogeneous nuclear ribonucleoprotein U                                                                                                                                                                                                                      |
| 67  | O14980           | 27                   | 129            | 34.5                  | 1071   | 123386 | 6.1 | Exportin-1                                                                                                                                                                                                                                                     |
| 67  | UPI0000456DC8    | 27                   | 129            | 34.5                  | 1070   | 123299 | 6.1 | Exportin-1 (Exp1) (Chromosome region maintenance 1 protein homolog).                                                                                                                                                                                           |
| 68  | Q4LE56           | 27                   | 80             | 29.4                  | 1097   | 125055 | 9.5 | MYO1C variant protein                                                                                                                                                                                                                                          |
| 69  | UPI00003677FD    | 27                   | 122            | 14.6                  | 2330   | 256509 | 5.8 | fibronectin 1 isoform 4 preproprotein                                                                                                                                                                                                                          |
| 69  | UPI0000167B25    | 27                   | 122            | 14.5                  | 2355   | 259223 | 5.7 | fibronectin 1 isoform 3 preproprotein                                                                                                                                                                                                                          |
| 69  | P02751-3         | 27                   | 122            | 14.5                  | 2355   | 259195 | 5.7 | Isoform 3 of P02751                                                                                                                                                                                                                                            |
| 69  | P02751           | 27                   | 122            | 14.3                  | 2386   | 262604 | 5.7 | Fibronectin precursor                                                                                                                                                                                                                                          |

| No. | Accession Number | Unique Peptide Count | Spectrum Count | Sequence Coverage (%) | Length | MolWt  | pI  | Descriptive Name                                                                                                                                                                                                                                               |
|-----|------------------|----------------------|----------------|-----------------------|--------|--------|-----|----------------------------------------------------------------------------------------------------------------------------------------------------------------------------------------------------------------------------------------------------------------|
| 69  | Q6N025           | 27                   | 122            | 14                    | 2444   | 268675 | 6.1 | Hypothetical protein DKFZp686M2451                                                                                                                                                                                                                             |
| 70  | P07355           | 26                   | 785            | 73.5                  | 339    | 38604  | 7.8 | Annexin A2                                                                                                                                                                                                                                                     |
| 70  | Q8TBV2           | 26                   | 785            | 73.5                  | 339    | 38576  | 7.8 | Annexin A2                                                                                                                                                                                                                                                     |
| 70  | UPI0000366A50    | 26                   | 785            | 69.7                  | 357    | 40411  | 8.4 | annexin A2 isoform 1                                                                                                                                                                                                                                           |
| 71  | Q07065           | 26                   | 361            | 51.7                  | 602    | 66023  | 5.9 | Cytoskeleton-associated protein 4                                                                                                                                                                                                                              |
| 72  | Q9BSJ8           | 26                   | 162            | 35.1                  | 1104   | 122856 | 5.8 | Protein FAM62A                                                                                                                                                                                                                                                 |
| 72  | Q9BSJ8-2         | 26                   | 162            | 34.8                  | 1114   | 124003 | 5.8 | Isoform 2 of Q9BSJ8                                                                                                                                                                                                                                            |
| 73  | Q15393           | 26                   | 80             | 27.9                  | 1217   | 135577 | 5.3 | Splicing factor 3B subunit 3                                                                                                                                                                                                                                   |
| 74  | Q16531           | 26                   | 57             | 25.1                  | 1140   | 126968 | 5.3 | DNA damage-binding protein 1                                                                                                                                                                                                                                   |
| 74  | UPI0000D62613    | 26                   | 57             | 25.1                  | 1140   | 126966 | 5.3 | DNA damage-binding protein 1 (Damage-specific DNA-binding protein 1) (UV-damaged DNA-binding factor) (DDB p127 subunit) (DDBa) (UV-damaged DNA-binding protein 1) (UV-DDB 1) (Xeroderma pigmentosum group E-complementing protein) (XPCE) (XPE-binding factor) |
| 75  | Q53SY7           | 26                   | 72             | 15.4                  | 2151   | 235175 | 6.6 | Hypothetical protein CAD                                                                                                                                                                                                                                       |
| 75  | P27708           | 26                   | 72             | 14.9                  | 2225   | 242981 | 6.5 | CAD protein [Includes: Glutamine-dependent carbamoyl-phosphate synthase (EC 6.3.5.5); Aspartate carbamoyltransferase (EC 2.1.3.2); Dihydroorotase (EC 3.5.2.3)]                                                                                                |
| 76  | P50395           | 25                   | 147            | 69.2                  | 445    | 50663  | 6.5 | Rab GDP dissociation inhibitor beta                                                                                                                                                                                                                            |
| 77  | P04843           | 25                   | 529            | 53.9                  | 607    | 68569  | 6.4 | Dolichyl-diphosphooligosaccharide-protein glycosyltransferase 67 kDa subunit precursor                                                                                                                                                                         |
| 77  | Q6IBR0           | 25                   | 529            | 53.9                  | 607    | 68607  | 6.4 | RPN1 protein                                                                                                                                                                                                                                                   |
| 78  | P40939           | 25                   | 176            | 48.8                  | 763    | 83000  | 9   | Trifunctional enzyme subunit alpha, mitochondrial precursor (TP-alpha) (78 kDa gastrin-binding protein) [Includes: Long-chain enoyl-CoA hydratase (EC 4.2.1.17); Long chain 3-hydroxyacyl-CoA dehydrogenase (EC 1.1.1.211)]                                    |
| 79  | P11940           | 25                   | 148            | 45.1                  | 636    | 70671  | 9.5 | Polyadenylate-binding protein 1 (Poly(A)-binding protein 1)                                                                                                                                                                                                    |
| 80  | P43243           | 25                   | 140            | 35.1                  | 847    | 94623  | 6.3 | Matrin-3                                                                                                                                                                                                                                                       |
| 81  | P19338           | 25                   | 265            | 34.8                  | 710    | 76615  | 4.7 | Nucleolin                                                                                                                                                                                                                                                      |
| 82  | Q14764           | 25                   | 129            | 34.6                  | 893    | 99327  | 5.5 | Major vault protein                                                                                                                                                                                                                                            |
| 83  | P09874           | 25                   | 81             | 29.1                  | 1014   | 113084 | 8.9 | Poly [ADP-ribose] polymerase 1 (EC 2.4.2.30) (PARP-1) (ADPRT) (NAD(+) ADP-ribosyltransferase 1)                                                                                                                                                                |
| 84  | O75533           | 25                   | 118            | 24.5                  | 1304   | 145815 | 7   | Splicing factor 3B subunit 1                                                                                                                                                                                                                                   |
| 84  | UPI000013D493    | 25                   | 118            | 24.5                  | 1304   | 145830 | 7.1 | splicing factor 3b, subunit 1 isoform 1                                                                                                                                                                                                                        |
| 85  | Q9NTJ3           | 25                   | 78             | 22.7                  | 1288   | 147182 | 6.8 | Structural maintenance of chromosomes protein 4                                                                                                                                                                                                                |
| 86  | Q9BQG0           | 25                   | 88             | 22.1                  | 1328   | 148854 | 9.3 | Myb-binding protein 1A                                                                                                                                                                                                                                         |
| 86  | Q9BQG0-2         | 25                   | 88             | 22.1                  | 1332   | 149366 | 9.3 | Isoform 2 of Q9BQG0                                                                                                                                                                                                                                            |
| 87  | Q92616           | 25                   | 166            | 13.3                  | 2671   | 292742 | 7.4 | GCN1-like protein 1                                                                                                                                                                                                                                            |

| No. | Accession Number | Unique Peptide Count | Spectrum Count | Sequence Coverage (%) | Length | MolWt  | pI  | Descriptive Name                                                                                                                                                                                                                                                                                  |
|-----|------------------|----------------------|----------------|-----------------------|--------|--------|-----|---------------------------------------------------------------------------------------------------------------------------------------------------------------------------------------------------------------------------------------------------------------------------------------------------|
| 87  | UPI0000451CA7    | 25                   | 166            | 13.3                  | 2671   | 292708 | 7.4 | GCN1 general control of amino-acid synthesis 1-like 1                                                                                                                                                                                                                                             |
| 88  | Q6P2Q9           | 25                   | 102            | 12.6                  | 2335   | 273599 | 8.8 | Pre-mRNA-processing-splicing factor 8                                                                                                                                                                                                                                                             |
| 89  | P00558           | 24                   | 129            | 67.6                  | 417    | 44615  | 8.1 | Phosphoglycerate kinase 1                                                                                                                                                                                                                                                                         |
| 90  | P78371           | 24                   | 105            | 60.9                  | 535    | 57488  | 6.4 | T-complex protein 1 subunit beta                                                                                                                                                                                                                                                                  |
| 91  | P30101           | 24                   | 259            | 60.6                  | 505    | 56782  | 6.4 | Protein disulfide-isomerase A3 precursor                                                                                                                                                                                                                                                          |
| 92  | P11413-2         | 24                   | 68             | 53.3                  | 561    | 63827  | 6.9 | Isoform Long of P11413                                                                                                                                                                                                                                                                            |
| 93  | P29401           | 24                   | 277            | 49.4                  | 623    | 67878  | 7.7 | Transketolase                                                                                                                                                                                                                                                                                     |
| 94  | Q05682-5         | 24                   | 253            | 41.4                  | 532    | 61213  | 6.7 | Isoform 5 of Q05682                                                                                                                                                                                                                                                                               |
| 94  | Q05682-4         | 24                   | 253            | 40.9                  | 538    | 62663  | 6.4 | Isoform 4 of Q05682                                                                                                                                                                                                                                                                               |
| 95  | P52272-2         | 24                   | 228            | 42.5                  | 691    | 73621  | 8.8 | Isoform 2 of P52272                                                                                                                                                                                                                                                                               |
| 95  | P52272           | 24                   | 228            | 40.3                  | 730    | 77516  | 8.7 | Heterogeneous nuclear ribonucleoprotein M                                                                                                                                                                                                                                                         |
| 96  | P17844           | 24                   | 160            | 39.6                  | 614    | 69148  | 8.9 | Probable ATP-dependent RNA helicase DDX5                                                                                                                                                                                                                                                          |
| 97  | Q9Y678           | 24                   | 188            | 38.9                  | 874    | 97718  | 5.5 | Coatomer subunit gamma                                                                                                                                                                                                                                                                            |
| 98  | Q14697           | 24                   | 216            | 30.7                  | 944    | 106874 | 6.1 | Neutral alpha-glucosidase AB precursor                                                                                                                                                                                                                                                            |
| 98  | UPI00003667D2    | 24                   | 216            | 30.7                  | 944    | 106847 | 6.2 | Neutral alpha-glucosidase AB precursor (EC 3.2.1.84) (Glucosidase II subunit alpha).                                                                                                                                                                                                              |
| 99  | P31939           | 23                   | 80             | 57.4                  | 592    | 64616  | 6.7 | Bifunctional purine biosynthesis protein PURH [Includes: Phosphoribosylaminoimidazolecarboxamide formyltransferase (EC 2.1.2.3) (5-aminoimidazole-4-carboxamide ribonucleotide formyltransferase) (AICAR transformylase); IMP cyclohydrolase (EC 3.5.4.10) (Inosinicase) (IMP synthetase) (ATIC)] |
| 100 | P38646           | 23                   | 186            | 39.9                  | 679    | 73681  | 6.2 | Stress-70 protein, mitochondrial precursor                                                                                                                                                                                                                                                        |
| 101 | Q13200           | 23                   | 102            | 36.2                  | 908    | 100200 | 5.2 | 26S proteasome non-ATPase regulatory subunit 2                                                                                                                                                                                                                                                    |
| 101 | Q53XQ4           | 23                   | 102            | 36.2                  | 908    | 100249 | 5.2 | Proteasome (Prosome, macropain) 26S subunit, non-ATPase, 2                                                                                                                                                                                                                                        |
| 101 | Q59EG8           | 23                   | 102            | 36                    | 913    | 100588 | 5.2 | Proteasome 26S non-ATPase subunit 2 variant                                                                                                                                                                                                                                                       |
| 102 | P41252           | 23                   | 62             | 23.4                  | 1266   | 144958 | 6.2 | Isoleucyl-tRNA synthetase, cytoplasmic                                                                                                                                                                                                                                                            |
| 102 | Q59G75           | 23                   | 62             | 23.1                  | 1279   | 146344 | 6.4 | Isoleucyl-tRNA synthetase, cytoplasmic variant                                                                                                                                                                                                                                                    |
| 103 | UPI000013C8EF    | 23                   | 78             | 15.6                  | 1912   | 218003 | 5.9 | chromodomain helicase DNA binding protein 4                                                                                                                                                                                                                                                       |
| 103 | UPI00001AE66A    | 23                   | 78             | 15.4                  | 1940   | 220846 | 6   | Chromodomain helicase-DNA-binding protein 4 (EC 3.6.1.-) (ATP-dependent helicase CHD4) (CHD-4) (Mi-2 autoantigen 218 kDa protein) (Mi2-beta).                                                                                                                                                     |
| 104 | P07437           | 22                   | 700            | 72.3                  | 444    | 49671  | 4.9 | Tubulin beta chain                                                                                                                                                                                                                                                                                |
| 105 | P06576           | 22                   | 340            | 63.7                  | 529    | 56560  | 5.4 | ATP synthase subunit beta, mitochondrial precursor                                                                                                                                                                                                                                                |
| 106 | P68104           | 22                   | 1104           | 49.1                  | 462    | 50141  | 9   | Elongation factor 1-alpha 1                                                                                                                                                                                                                                                                       |
| 106 | Q6IPT9           | 22                   | 1104           | 49.1                  | 462    | 50185  | 9.1 | Eukaryotic translation elongation factor 1 alpha 1                                                                                                                                                                                                                                                |



| No. | Accession Number | Unique Peptide Count | Spectrum Count | Sequence Coverage (%) | Length | MolWt  | pI  | Descriptive Name                                                                                                                     |
|-----|------------------|----------------------|----------------|-----------------------|--------|--------|-----|--------------------------------------------------------------------------------------------------------------------------------------|
| 106 | Q6IPN6           | 22                   | 1104           | 49.1                  | 462    | 50123  | 9   | Eukaryotic translation elongation factor 1 alpha 1                                                                                   |
| 106 | Q5VTE0           | 22                   | 1104           | 49.1                  | 462    | 50185  | 9.1 | Eukaryotic translation elongation factor 1 alpha-like 3                                                                              |
| 106 | Q53HR5           | 22                   | 1104           | 49.1                  | 462    | 50125  | 9   | Eukaryotic translation elongation factor 1 alpha 1 variant                                                                           |
| 106 | Q53HQ7           | 22                   | 1104           | 49.1                  | 462    | 50199  | 8.9 | Eukaryotic translation elongation factor 1 alpha 1 variant                                                                           |
| 106 | Q53HM9           | 22                   | 1104           | 49.1                  | 462    | 50142  | 8.9 | Eukaryotic translation elongation factor 1 alpha 1 variant                                                                           |
| 107 | P48643           | 22                   | 115            | 48.1                  | 541    | 59671  | 5.6 | T-complex protein 1 subunit epsilon                                                                                                  |
| 108 | UPI0000D61699    | 22                   | 121            | 43                    | 670    | 75529  | 5.6 | Annexin A6 (Annexin VI) (Lipocortin VI) (P68) (P70) (Protein III) (Chromobindin-20) (67 kDa calelectrin) (Calphobindin-II) (CPB-II). |
| 108 | P08133           | 22                   | 121            | 42.8                  | 673    | 75873  | 5.6 | Annexin A6                                                                                                                           |
| 109 | Q5M7Z9           | 22                   | 91             | 42.4                  | 682    | 78606  | 6.9 | TARS protein                                                                                                                         |
| 109 | P26639           | 22                   | 91             | 40                    | 723    | 83435  | 6.7 | Threonyl-tRNA synthetase, cytoplasmic                                                                                                |
| 109 | Q53GX7           | 22                   | 91             | 40                    | 723    | 83445  | 6.7 | Threonyl-tRNA synthetase variant                                                                                                     |
| 110 | P55060-3         | 22                   | 165            | 30.6                  | 945    | 107777 | 5.8 | Isoform 3 of P55060                                                                                                                  |
| 110 | P55060           | 22                   | 165            | 29.8                  | 971    | 110417 | 5.8 | Exportin-2                                                                                                                           |
| 111 | O00410           | 22                   | 124            | 28.3                  | 1097   | 123630 | 4.9 | Importin beta-3                                                                                                                      |
| 111 | UPI0000163C1C    | 22                   | 124            | 27.8                  | 1115   | 125545 | 4.9 | RAN binding protein 5                                                                                                                |
| 112 | P78347-2         | 22                   | 48             | 25.4                  | 957    | 107970 | 7.9 | Isoform 2 of P78347                                                                                                                  |
| 112 | Q499G6           | 22                   | 48             | 24.9                  | 976    | 110080 | 7.6 | General transcription factor II, i                                                                                                   |
| 112 | P78347-4         | 22                   | 48             | 24.9                  | 977    | 110106 | 7.4 | Isoform 4 of P78347                                                                                                                  |
| 112 | P78347-3         | 22                   | 48             | 24.8                  | 978    | 110280 | 6.7 | Isoform 3 of P78347                                                                                                                  |
| 112 | P78347           | 22                   | 48             | 24.3                  | 998    | 112416 | 6.4 | General transcription factor II-I                                                                                                    |
| 113 | P04075           | 21                   | 250            | 70.9                  | 364    | 39420  | 8.1 | Fructose-bisphosphate aldolase A                                                                                                     |
| 114 | P06733           | 21                   | 553            | 68.4                  | 434    | 47169  | 7.4 | Alpha-enolase                                                                                                                        |
| 114 | Q53FT9           | 21                   | 553            | 68.4                  | 434    | 47197  | 7.4 | Enolase 1 variant                                                                                                                    |
| 115 | P60842           | 21                   | 129            | 64                    | 406    | 46154  | 5.5 | Eukaryotic initiation factor 4A-I                                                                                                    |
| 116 | P50454           | 21                   | 244            | 55.3                  | 418    | 46441  | 8.7 | Serpin H1 precursor                                                                                                                  |
| 117 | P08238           | 21                   | 345            | 49.3                  | 724    | 83264  | 5   | Heat shock protein HSP 90-beta                                                                                                       |
| 117 | UPI00001AE8D8    | 21                   | 345            | 48.5                  | 736    | 84758  | 5.4 | Heat shock protein HSP 90-beta (HSP 84) (HSP 90).                                                                                    |
| 118 | P25705           | 21                   | 177            | 48.6                  | 553    | 59751  | 9.1 | ATP synthase subunit alpha, mitochondrial precursor                                                                                  |
| 119 | P17987           | 21                   | 104            | 45.9                  | 556    | 60344  | 6.1 | T-complex protein 1 subunit alpha                                                                                                    |
| 120 | P17655           | 21                   | 94             | 45.4                  | 700    | 80009  | 5   | Calpain-2 catalytic subunit precursor                                                                                                |
| 120 | UPI000003475E    | 21                   | 94             | 45.4                  | 700    | 80007  | 5   | calpain 2, large subunit                                                                                                             |
| 120 | Q59EF6           | 21                   | 94             | 43.6                  | 729    | 83109  | 5.1 | Calpain 2, large [catalytic] subunit variant                                                                                         |
| 121 | P31948           | 21                   | 68             | 41.6                  | 543    | 62639  | 6.8 | Stress-induced-phosphoprotein 1                                                                                                      |
| 122 | P20700           | 21                   | 90             | 40.4                  | 586    | 66408  | 5.2 | Lamin-B1                                                                                                                             |
| 123 | Q53T76           | 21                   | 99             | 40.8                  | 693    | 77252  | 6.9 | Hypothetical protein GPD2                                                                                                            |
| 123 | P43304           | 21                   | 99             | 38.9                  | 727    | 80834  | 7.5 | Glycerol-3-phosphate dehydrogenase, mitochondrial precursor                                                                          |
| 124 | Q14974           | 21                   | 166            | 36.3                  | 876    | 97170  | 4.8 | Importin beta-1 subunit                                                                                                              |
| 125 | Q01813           | 21                   | 59             | 36.1                  | 784    | 85596  | 7.6 | 6-phosphofructokinase type C                                                                                                         |

| No. | Accession Number | Unique Peptide Count | Spectrum Count | Sequence Coverage (%) | Length | MolWt  | pI  | Descriptive Name                                                                                                     |
|-----|------------------|----------------------|----------------|-----------------------|--------|--------|-----|----------------------------------------------------------------------------------------------------------------------|
| 126 | P23246           | 21                   | 153            | 35.1                  | 707    | 76150  | 9.4 | Splicing factor, proline- and glutamine-rich                                                                         |
| 127 | P53618           | 21                   | 94             | 29.6                  | 953    | 107142 | 6   | Coatomer subunit beta                                                                                                |
| 128 | P49588           | 21                   | 89             | 27.6                  | 968    | 106810 | 5.5 | Alanyl-tRNA synthetase, cytoplasmic                                                                                  |
| 128 | UPI0000D61A0F    | 21                   | 89             | 27.6                  | 968    | 106710 | 5.5 | Alanyl-tRNA synthetase, cytoplasmic (EC 6.1.1.7) (Alanine--tRNA ligase) (AlaRS) (Renal carcinoma antigen NY-REN-42). |
| 129 | Q9H0A0           | 21                   | 65             | 25.3                  | 1025   | 115704 | 8.3 | N-acetyltransferase 10                                                                                               |
| 129 | UPI000015F46F    | 21                   | 65             | 25.3                  | 1025   | 115748 | 8.3 | N-acetyltransferase-like protein                                                                                     |
| 129 | UPI000013CF8E    | 21                   | 65             | 25.3                  | 1025   | 115730 | 8.3 | N-acetyltransferase 10 (EC 2.3.1.-).                                                                                 |
| 130 | O15061           | 21                   | 71             | 17.1                  | 1565   | 172767 | 5.2 | Desmuslin                                                                                                            |
| 130 | UPI0000DC3AA9    | 21                   | 71             | 17.1                  | 1565   | 172867 | 5.2 | desmuslin isoform A                                                                                                  |
| 131 | P68363           | 20                   | 581            | 58.3                  | 451    | 50152  | 5.1 | Tubulin alpha-ubiquitous chain                                                                                       |
| 132 | Q53HV2           | 20                   | 128            | 54                    | 543    | 59341  | 7.6 | Chaperonin containing TCP1, subunit 7 (Eta) variant                                                                  |
| 132 | Q99832           | 20                   | 128            | 54                    | 543    | 59367  | 7.6 | T-complex protein 1 subunit eta                                                                                      |
| 133 | P08107           | 20                   | 129            | 48.7                  | 641    | 70038  | 5.6 | Heat shock 70 kDa protein 1                                                                                          |
| 133 | UPI000013C67D    | 20                   | 129            | 48.7                  | 641    | 70025  | 5.6 | heat shock 70kDa protein 1B                                                                                          |
| 133 | Q5JQI4           | 20                   | 129            | 48.7                  | 641    | 70052  | 5.6 | Heat shock 70kDa protein 1A                                                                                          |
| 133 | Q59EJ3           | 20                   | 129            | 44                    | 709    | 77496  | 6.3 | Heat shock 70kDa protein 1A variant                                                                                  |
| 134 | Q5SZY0           | 20                   | 136            | 49.4                  | 522    | 57972  | 6.9 | Chaperonin containing TCP1, subunit 3                                                                                |
| 134 | UPI00004CA9C4    | 20                   | 136            | 47.4                  | 544    | 60463  | 6.5 | chaperonin containing TCP1, subunit 3 isoform b                                                                      |
| 134 | P49368           | 20                   | 136            | 47.3                  | 545    | 60534  | 6.5 | T-complex protein 1 subunit gamma                                                                                    |
| 135 | P46063           | 20                   | 93             | 42.1                  | 649    | 73456  | 8.1 | ATP-dependent DNA helicase Q1                                                                                        |
| 135 | UPI0000167E2F    | 20                   | 93             | 42.1                  | 649    | 73457  | 7.9 | RecQ protein-like isoform 1                                                                                          |
| 136 | P13010           | 20                   | 125            | 39.9                  | 732    | 82705  | 5.8 | ATP-dependent DNA helicase 2 subunit 2                                                                               |
| 137 | UPI0000136C97    | 20                   | 164            | 33.9                  | 760    | 84901  | 6.6 | transferrin receptor                                                                                                 |
| 138 | Q15459           | 20                   | 58             | 30.3                  | 793    | 88886  | 5.2 | Splicing factor 3 subunit 1                                                                                          |
| 139 | Q8IXJ3           | 20                   | 63             | 34.5                  | 850    | 95372  | 6   | Small nuclear ribonucleoprotein component                                                                            |
| 139 | Q15029           | 20                   | 63             | 30.1                  | 972    | 109436 | 5   | 116 kDa U5 small nuclear ribonucleoprotein component                                                                 |
| 139 | UPI0000169E0D    | 20                   | 63             | 30.1                  | 972    | 109478 | 5   | U5 snRNP-specific protein, 116 kD                                                                                    |
| 139 | Q6IBM8           | 20                   | 63             | 30.1                  | 972    | 109460 | 5   | U5-116KD protein                                                                                                     |
| 140 | O95373           | 20                   | 120            | 25.1                  | 1038   | 119516 | 4.8 | Importin-7                                                                                                           |
| 140 | UPI0000D625B4    | 20                   | 120            | 25.1                  | 1040   | 119702 | 4.8 | Importin-7 (Imp7) (Ran-binding protein 7) (RanBP7).                                                                  |
| 141 | Q15155           | 20                   | 45             | 22.2                  | 1222   | 134352 | 5.8 | Nodal modulator 1 precursor                                                                                          |
| 141 | UPI00001AF3F1    | 20                   | 45             | 22.2                  | 1222   | 134133 | 5.7 | nodal modulator 3                                                                                                    |
| 141 | UPI000013D37E    | 20                   | 45             | 22.2                  | 1222   | 134324 | 5.8 | nodal modulator 1                                                                                                    |
| 141 | UPI00001AE864    | 20                   | 45             | 21.4                  | 1267   | 139381 | 5.7 | Nodal modulator 3 precursor (pM5 protein 3).                                                                         |
| 141 | Q5JPE7           | 20                   | 45             | 21.4                  | 1267   | 139439 | 5.8 | Nodal modulator 2 precursor                                                                                          |
| 142 | P26640           | 20                   | 88             | 18.2                  | 1264   | 140476 | 7.6 | Valyl-tRNA synthetase                                                                                                |
| 142 | UPI0000457409    | 20                   | 88             | 18.2                  | 1264   | 140376 | 7.8 | Valyl-tRNA synthetase (EC 6.1.1.9) (Valine--tRNA ligase) (ValRS) (Protein G7a).                                      |
| 143 | Q6YHK3           | 20                   | 121            | 17.8                  | 1445   | 161688 | 5.8 | CD109 antigen precursor                                                                                              |
| 144 | Q71UH4           | 20                   | 50             | 14.3                  | 1598   | 180613 | 7.9 | DNA topoisomerase II beta                                                                                            |
| 144 | Q02880-2         | 20                   | 50             | 14.1                  | 1621   | 182661 | 8.1 | Isoform Beta                                                                                                         |
| 144 | Q02880           | 20                   | 50             | 14                    | 1626   | 183266 | 8   | DNA topoisomerase 2-beta                                                                                             |
| 145 | P60174           | 19                   | 298            | 85.1                  | 249    | 26669  | 6.9 | Triosephosphate isomerase                                                                                            |

| No. | Accession Number | Unique Peptide Count | Spectrum Count | Sequence Coverage (%) | Length | MolWt | pI  | Descriptive Name                                                                                                                                                                                                                                                                                                      |
|-----|------------------|----------------------|----------------|-----------------------|--------|-------|-----|-----------------------------------------------------------------------------------------------------------------------------------------------------------------------------------------------------------------------------------------------------------------------------------------------------------------------|
| 146 | P63104           | 19                   | 866            | 72.2                  | 245    | 27745 | 4.8 | 14-3-3 protein zeta/delta                                                                                                                                                                                                                                                                                             |
| 147 | P08758           | 19                   | 217            | 71.6                  | 320    | 35937 | 5   | Annexin A5                                                                                                                                                                                                                                                                                                            |
| 148 | P40926           | 19                   | 257            | 67.8                  | 338    | 35531 | 8.7 | Malate dehydrogenase, mitochondrial precursor                                                                                                                                                                                                                                                                         |
| 148 | UPI000013DA68    | 19                   | 257            | 67.8                  | 338    | 35503 | 8.7 | mitochondrial malate dehydrogenase precursor                                                                                                                                                                                                                                                                          |
| 148 | Q6FHZ0           | 19                   | 257            | 67.8                  | 338    | 35559 | 8.7 | MDH2 protein                                                                                                                                                                                                                                                                                                          |
| 149 | P04083           | 19                   | 171            | 62.7                  | 346    | 38714 | 7   | Annexin A1                                                                                                                                                                                                                                                                                                            |
| 150 | Q02790           | 19                   | 64             | 55.1                  | 459    | 51805 | 5.4 | FK506-binding protein 4                                                                                                                                                                                                                                                                                               |
| 151 | Q05CK9           | 19                   | 131            | 55.6                  | 453    | 50651 | 6.7 | Hypothetical protein                                                                                                                                                                                                                                                                                                  |
| 151 | Q5TCG3           | 19                   | 131            | 44.8                  | 562    | 62656 | 7.6 | OTTHUMP00000016816                                                                                                                                                                                                                                                                                                    |
| 151 | O60506           | 19                   | 131            | 40.4                  | 623    | 69603 | 8.6 | Heterogeneous nuclear ribonucleoprotein Q                                                                                                                                                                                                                                                                             |
| 152 | P49748           | 19                   | 102            | 39.4                  | 655    | 70390 | 8.8 | Very-long-chain specific acyl-CoA dehydrogenase, mitochondrial precursor                                                                                                                                                                                                                                              |
| 153 | O00429-4         | 19                   | 100            | 39.6                  | 699    | 78100 | 6.8 | Isoform 4 of O00429                                                                                                                                                                                                                                                                                                   |
| 153 | UPI0000D621CC    | 19                   | 100            | 39                    | 710    | 79224 | 7.1 | Dynamin-1-like protein (EC 3.6.5.5) (Dynamin-like protein) (Dnm1p/Vps1p-like protein) (DVL) (Dynamin family member proline-rich carboxyl-terminal domain less) (Dymple) (Dynamin-related protein 1) (Dynamin-like protein 4) (Dynamin-like protein IV) (HdynIV)                                                       |
| 153 | O00429-5         | 19                   | 100            | 39                    | 710    | 79109 | 6.9 | Isoform 5 of O00429                                                                                                                                                                                                                                                                                                   |
| 153 | O00429-3         | 19                   | 100            | 39                    | 710    | 79442 | 6.9 | Isoform 3 of O00429                                                                                                                                                                                                                                                                                                   |
| 153 | O00429-2         | 19                   | 100            | 38.2                  | 725    | 80536 | 6.7 | Isoform 2 of O00429                                                                                                                                                                                                                                                                                                   |
| 153 | O00429           | 19                   | 100            | 37.6                  | 736    | 81877 | 6.8 | Dynamin-1-like protein                                                                                                                                                                                                                                                                                                |
| 153 | Q59GN9           | 19                   | 100            | 36.9                  | 751    | 83579 | 7.7 | Dynamin-like protein DYNIV-11 variant                                                                                                                                                                                                                                                                                 |
| 154 | A4D210           | 19                   | 88             | 29.8                  | 775    | 88681 | 5.1 | Eukaryotic translation initiation factor 3, subunit 9 eta, 116kDa                                                                                                                                                                                                                                                     |
| 154 | A4D208           | 19                   | 88             | 28.4                  | 814    | 92482 | 5   | Eukaryotic translation initiation factor 3, subunit 9 eta, 116kDa                                                                                                                                                                                                                                                     |
| 154 | P55884           | 19                   | 88             | 28.4                  | 814    | 92492 | 5   | Eukaryotic translation initiation factor 3 subunit 9                                                                                                                                                                                                                                                                  |
| 154 | P55884-2         | 19                   | 88             | 26.5                  | 873    | 99039 | 5.1 | Isoform 2 of P55884                                                                                                                                                                                                                                                                                                   |
| 155 | Q5T567           | 19                   | 65             | 27.4                  | 793    | 87089 | 7.1 | Aldehyde dehydrogenase 18 family, member A1                                                                                                                                                                                                                                                                           |
| 155 | P54886           | 19                   | 65             | 27.3                  | 795    | 87302 | 7.1 | Delta 1-pyrroline-5-carboxylate synthetase (P5CS) (Aldehyde dehydrogenase 18 family member A1) [Includes: Glutamate 5-kinase (EC 2.7.2.11) (Gamma-glutamyl kinase) (GK); Gamma-glutamyl phosphate reductase (GPR) (EC 1.2.1.41) (Glutamate-5-semialdehyde dehydrogenase) (Glutamyl-gamma-semialdehyde dehydrogenase)] |
| 156 | O43143           | 19                   | 91             | 26.8                  | 795    | 90933 | 7.5 | Putative pre-mRNA-splicing factor ATP-dependent RNA helicase DHX15                                                                                                                                                                                                                                                    |
| 157 | Q12906-5         | 19                   | 125            | 32.8                  | 690    | 74607 | 8.2 | Isoform 5 of Q12906                                                                                                                                                                                                                                                                                                   |
| 157 | Q12906-4         | 19                   | 125            | 32.4                  | 698    | 75509 | 8.4 | Isoform 4 of Q12906                                                                                                                                                                                                                                                                                                   |
| 157 | Q12906-2         | 19                   | 125            | 32.2                  | 702    | 76033 | 7.8 | Isoform 2 of Q12906                                                                                                                                                                                                                                                                                                   |
| 157 | Q12906-6         | 19                   | 125            | 32                    | 706    | 76502 | 7.9 | Isoform 6 of Q12906                                                                                                                                                                                                                                                                                                   |
| 157 | Q12906-3         | 19                   | 125            | 29.6                  | 764    | 82802 | 8.2 | Isoform 3 of Q12906                                                                                                                                                                                                                                                                                                   |

| No. | Accession Number | Unique Peptide Count | Spectrum Count | Sequence Coverage (%) | Length | MolWt  | pI  | Descriptive Name                                                                                                                                                                                                                                               |
|-----|------------------|----------------------|----------------|-----------------------|--------|--------|-----|----------------------------------------------------------------------------------------------------------------------------------------------------------------------------------------------------------------------------------------------------------------|
| 157 | UPI0000366D19    | 19                   | 125            | 29.5                  | 765    | 82924  | 8.2 | Interleukin enhancer-binding factor 3 (Nuclear factor of activated T-cells 90 kDa) (NF-AT-90) (Double-stranded RNA-binding protein 76) (DRBP76) (Translational control protein 80) (TCP80) (Nuclear factor associated with dsRNA) (NFAR) (M-phase phosphoprote |
| 157 | Q12906           | 19                   | 125            | 25.3                  | 894    | 95339  | 8.8 | Interleukin enhancer-binding factor 3                                                                                                                                                                                                                          |
| 158 | UPI000013E942    | 19                   | 94             | 23.9                  | 905    | 101085 | 6.9 | Hexokinase-1 (EC 2.7.1.1) (Hexokinase type I) (HK I) (Brain form hexokinase).                                                                                                                                                                                  |
| 158 | P19367-4         | 19                   | 94             | 23.9                  | 905    | 101104 | 7   | Isoform 4 of P19367                                                                                                                                                                                                                                            |
| 158 | P19367           | 19                   | 94             | 23.6                  | 917    | 102486 | 6.8 | Hexokinase-1                                                                                                                                                                                                                                                   |
| 159 | P11586           | 19                   | 51             | 22.2                  | 935    | 101559 | 7.3 | C-1-tetrahydrofolate synthase, cytoplasmic (C1-THF synthase) [Includes: Methylenetetrahydrofolate dehydrogenase (EC 1.5.1.5); Methenyltetrahydrofolate cyclohydrolase (EC 3.5.4.9); Formyltetrahydrofolate synthetase (EC 6.3.4.3)]                            |
| 159 | UPI0000161BEA    | 19                   | 51             | 22.2                  | 935    | 101531 | 7.2 | methylenetetrahydrofolate dehydrogenase 1                                                                                                                                                                                                                      |
| 160 | Q14203           | 19                   | 54             | 19.6                  | 1278   | 141694 | 5.8 | Dynactin-1                                                                                                                                                                                                                                                     |
| 160 | Q6MZZ3           | 19                   | 54             | 19.6                  | 1278   | 141550 | 5.9 | Hypothetical protein DKFZp686i0746                                                                                                                                                                                                                             |
| 161 | O60841           | 19                   | 50             | 18.4                  | 1220   | 138799 | 5.5 | Eukaryotic translation initiation factor 5B                                                                                                                                                                                                                    |
| 161 | UPI0000D61206    | 19                   | 50             | 18.4                  | 1220   | 138681 | 5.6 | Eukaryotic translation initiation factor 5B (eIF-5B) (Translation initiation factor IF-2).                                                                                                                                                                     |
| 161 | UPI0000207EC7    | 19                   | 50             | 18.4                  | 1220   | 138827 | 5.5 | eukaryotic translation initiation factor 5B                                                                                                                                                                                                                    |
| 161 | Q8N5A0           | 19                   | 50             | 18.4                  | 1220   | 138800 | 5.5 | Eukaryotic translation initiation factor 5B                                                                                                                                                                                                                    |
| 162 | O60264           | 19                   | 38             | 18.1                  | 1052   | 121905 | 8.1 | SWI/SNF-related matrix-associated actin-dependent regulator of chromatin subfamily A member 5                                                                                                                                                                  |
| 162 | UPI0000161FA8    | 19                   | 38             | 18.1                  | 1052   | 121933 | 8.1 | SWI/SNF-related matrix-associated actin-dependent regulator of chromatin a5                                                                                                                                                                                    |
| 163 | Q14980-2         | 19                   | 59             | 11.4                  | 2101   | 236513 | 5.8 | Isoform 2 of Q14980                                                                                                                                                                                                                                            |
| 164 | Q5T3Q7           | 19                   | 81             | 11                    | 2063   | 233274 | 6.6 | Protein BAP28                                                                                                                                                                                                                                                  |
| 164 | Q9H583           | 19                   | 81             | 10.6                  | 2144   | 242368 | 6.5 | HEAT repeat-containing protein 1                                                                                                                                                                                                                               |
| 165 | Q96HG5           | 18                   | 1607           | 67.1                  | 368    | 41005  | 5.8 | Actin, beta                                                                                                                                                                                                                                                    |
| 165 | P60709           | 18                   | 1607           | 65.9                  | 375    | 41737  | 5.5 | Actin, cytoplasmic 1                                                                                                                                                                                                                                           |
| 165 | Q53GK6           | 18                   | 1607           | 65.9                  | 375    | 41723  | 5.5 | Beta actin variant                                                                                                                                                                                                                                             |
| 165 | Q53G99           | 18                   | 1607           | 65.9                  | 375    | 41765  | 5.6 | Beta actin variant                                                                                                                                                                                                                                             |
| 165 | Q53G76           | 18                   | 1607           | 65.9                  | 375    | 41721  | 5.5 | Beta actin variant                                                                                                                                                                                                                                             |
| 165 | P63261           | 18                   | 1607           | 65.9                  | 375    | 41793  | 5.5 | Actin, cytoplasmic 2                                                                                                                                                                                                                                           |
| 166 | O43852           | 18                   | 204            | 65.1                  | 315    | 37107  | 4.6 | Calumenin precursor                                                                                                                                                                                                                                            |
| 167 | P00338           | 18                   | 750            | 63                    | 332    | 36689  | 8.3 | L-lactate dehydrogenase A chain                                                                                                                                                                                                                                |
| 168 | Q99475           | 18                   | 102            | 53.9                  | 549    | 60212  | 6.7 | KM-102-derived reductase-like factor                                                                                                                                                                                                                           |

| No. | Accession Number | Unique Peptide Count | Spectrum Count | Sequence Coverage (%) | Length | MolWt  | pI  | Descriptive Name                                                                                                                                                                                                                                                |
|-----|------------------|----------------------|----------------|-----------------------|--------|--------|-----|-----------------------------------------------------------------------------------------------------------------------------------------------------------------------------------------------------------------------------------------------------------------|
| 168 | UPI0000D6223A    | 18                   | 102            | 45.5                  | 651    | 71153  | 7.5 | CDNA FLJ46672 fis, clone TRACH3009008, highly similar to Thioredoxin reductase (EC 1.6.4.5).                                                                                                                                                                    |
| 169 | P52209           | 18                   | 89             | 51.3                  | 483    | 53140  | 7.2 | 6-phosphogluconate dehydrogenase, decarboxylating                                                                                                                                                                                                               |
| 169 | UPI0000D61E45    | 18                   | 89             | 51.1                  | 485    | 53339  | 7.4 | 6-phosphogluconate dehydrogenase, decarboxylating (EC 1.1.1.44).                                                                                                                                                                                                |
| 170 | P09493-3         | 18                   | 142            | 47.2                  | 284    | 32876  | 4.8 | Isoform 3 of P09493                                                                                                                                                                                                                                             |
| 171 | Q16851           | 18                   | 83             | 47                    | 508    | 56940  | 8.1 | UTP--glucose-1-phosphate uridylyltransferase 2                                                                                                                                                                                                                  |
| 172 | P05455           | 18                   | 67             | 46.1                  | 408    | 46837  | 7.1 | Lupus La protein                                                                                                                                                                                                                                                |
| 173 | P47895           | 18                   | 89             | 44.9                  | 512    | 56109  | 7.3 | Aldehyde dehydrogenase 1A3                                                                                                                                                                                                                                      |
| 173 | UPI0000129264    | 18                   | 89             | 44.9                  | 512    | 56009  | 7   | aldehyde dehydrogenase 1A3                                                                                                                                                                                                                                      |
| 174 | Q15233           | 18                   | 86             | 44.6                  | 471    | 54232  | 8.9 | Non-POU domain-containing octamer-binding protein (NonO protein) (54 kDa nuclear RNA- and DNA-binding protein) (p54(nrb))                                                                                                                                       |
| 175 | P50991           | 18                   | 84             | 44.3                  | 539    | 57924  | 7.8 | T-complex protein 1 subunit delta                                                                                                                                                                                                                               |
| 176 | Q5T6W5           | 18                   | 193            | 47.9                  | 428    | 47557  | 5.6 | Heterogeneous nuclear ribonucleoprotein K                                                                                                                                                                                                                       |
| 176 | P61978-3         | 18                   | 193            | 46.6                  | 440    | 48562  | 5.5 | Isoform 3 of P61978                                                                                                                                                                                                                                             |
| 176 | P61978           | 18                   | 193            | 44.3                  | 463    | 50976  | 5.5 | Heterogeneous nuclear ribonucleoprotein K                                                                                                                                                                                                                       |
| 176 | Q6IBN1           | 18                   | 193            | 44.2                  | 464    | 51028  | 5.3 | HNRPK protein                                                                                                                                                                                                                                                   |
| 177 | Q03252           | 18                   | 57             | 37                    | 600    | 67689  | 5.3 | Lamin-B2                                                                                                                                                                                                                                                        |
| 178 | O00571           | 18                   | 106            | 34.6                  | 662    | 73244  | 7.2 | ATP-dependent RNA helicase DDX3X                                                                                                                                                                                                                                |
| 179 | P12956           | 18                   | 125            | 34                    | 609    | 69843  | 6.6 | ATP-dependent DNA helicase 2 subunit 1                                                                                                                                                                                                                          |
| 179 | UPI000045708A    | 18                   | 125            | 34                    | 609    | 69870  | 6.6 | ATP-dependent DNA helicase 2 subunit 1 (ATP-dependent DNA helicase II 70 kDa subunit) (Lupus Ku autoantigen protein p70) (Ku70) (70 kDa subunit of Ku antigen) (Thyroid-lupus autoantigen) (TLAA) (CTC box- binding factor 75 kDa subunit) (CTCBF) (CTC75) (DNA |
| 179 | Q6FG89           | 18                   | 125            | 34                    | 609    | 69873  | 6.6 | G22P1 protein                                                                                                                                                                                                                                                   |
| 180 | O60568           | 18                   | 92             | 31.2                  | 738    | 84785  | 6.1 | Procollagen-lysine,2-oxoglutarate 5 dioxygenase 3 precursor                                                                                                                                                                                                     |
| 181 | O95573           | 18                   | 180            | 30.6                  | 720    | 80420  | 8.4 | Long-chain-fatty-acid--CoA ligase 3                                                                                                                                                                                                                             |
| 182 | P54136           | 18                   | 59             | 30.6                  | 660    | 75379  | 6.7 | Arginyl-tRNA synthetase, cytoplasmic                                                                                                                                                                                                                            |
| 183 | Q7Z451           | 18                   | 86             | 28.8                  | 880    | 98118  | 5.2 | Beta adaptin subunit                                                                                                                                                                                                                                            |
| 183 | P63010           | 18                   | 86             | 27                    | 937    | 104553 | 5.4 | AP-2 complex subunit beta-1                                                                                                                                                                                                                                     |
| 183 | UPI0000456A82    | 18                   | 86             | 26.9                  | 939    | 104711 | 5.4 | AP-2 complex subunit beta-1 (Adapter-related protein complex 2 beta-1 subunit) (Beta-adaptin) (Plasma membrane adaptor HA2/AP2 adaptin beta subunit) (Clathrin assembly protein complex 2 beta large chain) (AP105B).                                           |
| 183 | Q3ZB97           | 18                   | 86             | 26.6                  | 951    | 105692 | 5.3 | Ap2b1 protein                                                                                                                                                                                                                                                   |

| No. | Accession Number | Unique Peptide Count | Spectrum Count | Sequence Coverage (%) | Length | MolWt  | pI  | Descriptive Name                                                                                                                                                                                                      |
|-----|------------------|----------------------|----------------|-----------------------|--------|--------|-----|-----------------------------------------------------------------------------------------------------------------------------------------------------------------------------------------------------------------------|
| 183 | UPI0000456A83    | 18                   | 86             | 26.5                  | 953    | 105850 | 5.3 | AP-2 complex subunit beta-1 (Adapter-related protein complex 2 beta-1 subunit) (Beta-adaptin) (Plasma membrane adaptor HA2/AP2 adaptin beta subunit) (Clathrin assembly protein complex 2 beta large chain) (AP105B). |
| 184 | A1KYQ7           | 18                   | 74             | 22.2                  | 913    | 105404 | 5.7 | Cell migration-inducing protein 17                                                                                                                                                                                    |
| 184 | Q99613           | 18                   | 74             | 22.2                  | 913    | 105344 | 5.7 | Eukaryotic translation initiation factor 3 subunit 8                                                                                                                                                                  |
| 185 | Q8WUM6           | 18                   | 107            | 22.3                  | 798    | 88415  | 5.4 | Integrin, beta 1                                                                                                                                                                                                      |
| 185 | Q7Z3V1           | 18                   | 107            | 21.6                  | 823    | 91131  | 5.5 | Integrin beta                                                                                                                                                                                                         |
| 186 | Q86VX4           | 18                   | 43             | 18.5                  | 1217   | 141507 | 7.2 | Structural maintenance of chromosomes 3                                                                                                                                                                               |
| 186 | UPI0000D60FCC    | 18                   | 43             | 18.5                  | 1217   | 141557 | 7.4 | Structural maintenance of chromosomes protein 3 (Chondroitin sulfate proteoglycan 6) (Chromosome-associated polypeptide) (hCAP) (Bamacan) (Basement membrane-associated chondroitin proteoglycan).                    |
| 186 | Q9UQE7           | 18                   | 43             | 18.5                  | 1217   | 141541 | 7.2 | Structural maintenance of chromosomes protein 3                                                                                                                                                                       |
| 187 | Q15075           | 18                   | 31             | 16.2                  | 1411   | 162465 | 5.7 | Early endosome antigen 1                                                                                                                                                                                              |
| 187 | UPI000013C754    | 18                   | 31             | 16.2                  | 1411   | 162465 | 5.7 | Early endosome antigen 1 (Endosome-associated protein p162) (Zinc finger FYVE domain-containing protein 2).                                                                                                           |
| 188 | Q5XG74           | 18                   | 83             | 17.6                  | 1106   | 121651 | 6.9 | SEC31 homolog A                                                                                                                                                                                                       |
| 188 | Q17RR5           | 18                   | 83             | 16.2                  | 1205   | 131534 | 6.9 | SEC31 homolog A                                                                                                                                                                                                       |
| 188 | Q9UM05           | 18                   | 83             | 16                    | 1220   | 133031 | 6.9 | ABP130                                                                                                                                                                                                                |
| 188 | Q7LCX9           | 18                   | 83             | 16                    | 1220   | 133015 | 6.9 | Sec31 protein                                                                                                                                                                                                         |
| 188 | O94979           | 18                   | 83             | 15.9                  | 1229   | 134238 | 7   | SEC31 homolog A                                                                                                                                                                                                       |
| 189 | P49792           | 18                   | 53             | 6.4                   | 3224   | 358201 | 6.2 | E3 SUMO-protein ligase RanBP2                                                                                                                                                                                         |
| 189 | UPI0000167B4B    | 18                   | 53             | 6.4                   | 3224   | 358173 | 6.2 | RAN binding protein 2                                                                                                                                                                                                 |
| 190 | P23396           | 17                   | 176            | 74.5                  | 243    | 26688  | 9.7 | 40S ribosomal protein S3                                                                                                                                                                                              |
| 191 | P23528           | 17                   | 317            | 70.5                  | 166    | 18502  | 8.1 | Cofilin-1                                                                                                                                                                                                             |
| 192 | P07195           | 17                   | 715            | 59.9                  | 334    | 36639  | 6.1 | L-lactate dehydrogenase B chain                                                                                                                                                                                       |
| 193 | P61158           | 17                   | 89             | 57.9                  | 418    | 47371  | 5.9 | Actin-like protein 3                                                                                                                                                                                                  |
| 194 | Q6PIN5           | 17                   | 75             | 55.2                  | 373    | 41681  | 7.5 | PA2G4 protein                                                                                                                                                                                                         |
| 194 | Q9UQ80           | 17                   | 75             | 52.3                  | 394    | 43787  | 6.6 | Proliferation-associated protein 2G4                                                                                                                                                                                  |
| 194 | Q05D08           | 17                   | 75             | 50.7                  | 406    | 45151  | 8.9 | Hypothetical protein                                                                                                                                                                                                  |
| 195 | UPI0000126EBE    | 17                   | 131            | 46.7                  | 475    | 51673  | 8   | adenylyl cyclase-associated protein                                                                                                                                                                                   |
| 196 | P60228           | 17                   | 77             | 45.8                  | 445    | 52221  | 6   | Eukaryotic translation initiation factor 3 subunit 6                                                                                                                                                                  |
| 196 | Q6IAX5           | 17                   | 77             | 45.8                  | 445    | 52206  | 6   | EIF3S6 protein                                                                                                                                                                                                        |
| 197 | UPI0000D61084    | 17                   | 221            | 46.2                  | 599    | 65668  | 5.5 | Dolichyl-diphosphooligosaccharide-protein glycosyltransferase 63 kDa subunit precursor (EC 2.4.1.119) (Ribophorin II) (RPN-II) (RIBIIR).                                                                              |
| 197 | Q5JYR6           | 17                   | 221            | 45                    | 615    | 67723  | 6.1 | Ribophorin II                                                                                                                                                                                                         |
| 197 | P04844           | 17                   | 221            | 43.9                  | 631    | 69284  | 5.7 | Dolichyl-diphosphooligosaccharide-protein glycosyltransferase 63 kDa subunit precursor                                                                                                                                |

| No. | Accession Number | Unique Peptide Count | Spectrum Count | Sequence Coverage (%) | Length | MolWt  | pI  | Descriptive Name                                                                                                                                                                                                                                                                                                                                                                                                                                                         |
|-----|------------------|----------------------|----------------|-----------------------|--------|--------|-----|--------------------------------------------------------------------------------------------------------------------------------------------------------------------------------------------------------------------------------------------------------------------------------------------------------------------------------------------------------------------------------------------------------------------------------------------------------------------------|
| 198 | Q8TC62           | 17                   | 75             | 42.9                  | 417    | 48659  | 8.6 | Septin 7                                                                                                                                                                                                                                                                                                                                                                                                                                                                 |
| 198 | Q3LIE9           | 17                   | 75             | 42.8                  | 418    | 48774  | 8.6 | Predicted protein product of Nbla02942                                                                                                                                                                                                                                                                                                                                                                                                                                   |
| 198 | A4GY8            | 17                   | 75             | 41.3                  | 433    | 50263  | 8.6 | Hypothetical protein DKFZp686F17268                                                                                                                                                                                                                                                                                                                                                                                                                                      |
| 198 | Q16181-2         | 17                   | 75             | 41.1                  | 436    | 50581  | 8.6 | Isoform 2 of Q16181                                                                                                                                                                                                                                                                                                                                                                                                                                                      |
| 198 | Q16181           | 17                   | 75             | 41                    | 437    | 50680  | 8.6 | Septin-7                                                                                                                                                                                                                                                                                                                                                                                                                                                                 |
| 198 | UPI0000D61C26    | 17                   | 75             | 40.9                  | 438    | 50809  | 8.5 | Septin-7 (CDC10 protein homolog).                                                                                                                                                                                                                                                                                                                                                                                                                                        |
| 199 | P61221           | 17                   | 56             | 37.7                  | 599    | 67314  | 8.3 | ATP-binding cassette sub-family E member 1                                                                                                                                                                                                                                                                                                                                                                                                                               |
| 200 | Q86UE4           | 17                   | 193            | 36.4                  | 582    | 63837  | 9.3 | Protein LYRIC                                                                                                                                                                                                                                                                                                                                                                                                                                                            |
| 201 | P21980           | 17                   | 51             | 34.9                  | 687    | 77329  | 5.2 | Protein-glutamine gamma-glutamyltransferase 2 (EC 2.3.2.13) (Tissue transglutaminase) (TGase C) (TGC) (TG(C))                                                                                                                                                                                                                                                                                                                                                            |
| 202 | O94973           | 17                   | 53             | 27.5                  | 939    | 103960 | 7   | AP-2 complex subunit alpha-2                                                                                                                                                                                                                                                                                                                                                                                                                                             |
| 202 | Q53ET1           | 17                   | 53             | 27.4                  | 940    | 104089 | 6.9 | Adaptor-related protein complex 2, alpha 2 subunit variant                                                                                                                                                                                                                                                                                                                                                                                                               |
| 203 | Q5U4P6           | 17                   | 74             | 26.3                  | 710    | 72897  | 7.9 | KHSRP protein                                                                                                                                                                                                                                                                                                                                                                                                                                                            |
| 203 | UPI0000D61707    | 17                   | 74             | 26.1                  | 717    | 73805  | 8.1 | Far upstream element-binding protein 2 (FUSE-binding protein 2) (KH type-splicing regulatory protein) (KSRP) (p75).                                                                                                                                                                                                                                                                                                                                                      |
| 204 | P22102           | 17                   | 43             | 24.4                  | 1010   | 107767 | 6.7 | Trifunctional purine biosynthetic protein adenosine-3 [Includes: Phosphoribosylamine-glycine ligase (EC 6.3.4.13) (GARS) (Glycinamide ribonucleotide synthetase) (Phosphoribosylglycinamide synthetase); Phosphoribosylformylglycinamide cyclo-ligase (EC 6.3.3.1) (AIRS) (Phosphoribosyl-aminoimidazole synthetase) (AIR synthase); Phosphoribosylglycinamide formyltransferase (EC 2.1.2.2) (GART) (GAR transformylase) (5'-phosphoribosylglycinamide transformylase)] |
| 204 | Q3B7A7           | 17                   | 43             | 24.4                  | 1010   | 107723 | 6.8 | Phosphoribosylglycinamide formyltransferase, phosphoribosylglycinamide synthetase, phosphoribosylaminoimidazole synthetase                                                                                                                                                                                                                                                                                                                                               |
| 204 | Q59HH3           | 17                   | 43             | 23.5                  | 1046   | 112138 | 7.4 | Phosphoribosylglycinamide formyltransferase, phosphoribosylglycinamide synthetase, phosphoribosylaminoimidazole synthetase isoform 1 variant                                                                                                                                                                                                                                                                                                                             |
| 205 | Q9UDX0           | 17                   | 50             | 22.8                  | 1023   | 115935 | 6.9 | Oxoglutarate (Alpha-ketoglutarate) dehydrogenase                                                                                                                                                                                                                                                                                                                                                                                                                         |
| 206 | Q9NSE4           | 17                   | 58             | 20.9                  | 1012   | 113791 | 7.2 | Isoleucyl-tRNA synthetase, mitochondrial precursor                                                                                                                                                                                                                                                                                                                                                                                                                       |
| 207 | Q13423           | 17                   | 76             | 18.3                  | 1086   | 113895 | 8.1 | NAD(P) transhydrogenase, mitochondrial precursor                                                                                                                                                                                                                                                                                                                                                                                                                         |

| No. | Accession Number | Unique Peptide Count | Spectrum Count | Sequence Coverage (%) | Length | MolWt  | pI   | Descriptive Name                                                                                     |
|-----|------------------|----------------------|----------------|-----------------------|--------|--------|------|------------------------------------------------------------------------------------------------------|
| 207 | Q2TB59           | 17                   | 76             | 18.3                  | 1086   | 113883 | 8.1  | Nicotinamide nucleotide transhydrogenase                                                             |
| 208 | Q13045           | 17                   | 56             | 17                    | 1269   | 144751 | 6.1  | Protein flightless-1 homolog                                                                         |
| 209 | Q14683           | 17                   | 53             | 14.6                  | 1233   | 143233 | 7.6  | Structural maintenance of chromosomes protein 1A                                                     |
| 210 | P11047           | 17                   | 37             | 11.7                  | 1609   | 177606 | 5.1  | Laminin subunit gamma-1 precursor                                                                    |
| 210 | UPI0000034928    | 17                   | 37             | 11.7                  | 1609   | 177572 | 5.1  | laminin, gamma 1 precursor                                                                           |
| 210 | Q5VYE7           | 17                   | 37             | 11.7                  | 1609   | 177602 | 5.1  | Laminin, gamma 1                                                                                     |
| 211 | Q14690           | 17                   | 45             | 10.5                  | 1871   | 208699 | 8.9  | RRP5 protein homolog                                                                                 |
| 212 | P63244           | 16                   | 146            | 72.6                  | 317    | 35077  | 7.7  | Guanine nucleotide-binding protein subunit beta 2-like 1                                             |
| 212 | Q5VLR4           | 16                   | 146            | 66.3                  | 347    | 37889  | 8.2  | Lung cancer oncogene 7                                                                               |
| 213 | Q99623           | 16                   | 112            | 57.5                  | 299    | 33296  | 9.8  | Prohibitin-2                                                                                         |
| 214 | P62701           | 16                   | 167            | 55.9                  | 263    | 29598  | 10.2 | 40S ribosomal protein S4, X isoform                                                                  |
| 215 | P62191           | 16                   | 41             | 44.5                  | 440    | 49185  | 6.2  | 26S protease regulatory subunit 4                                                                    |
| 215 | Q53HB3           | 16                   | 41             | 44.5                  | 440    | 49213  | 6.2  | Proteasome 26S ATPase subunit 1 variant                                                              |
| 216 | P37837           | 16                   | 148            | 44.2                  | 337    | 37540  | 6.8  | Transaldolase                                                                                        |
| 217 | Q53G71           | 16                   | 122            | 45.3                  | 406    | 46919  | 4.4  | Calreticulin variant                                                                                 |
| 217 | P27797           | 16                   | 122            | 44.1                  | 417    | 48142  | 4.4  | Calreticulin precursor                                                                               |
| 218 | P14866           | 16                   | 68             | 40.5                  | 558    | 60187  | 7.1  | Heterogeneous nuclear ribonucleoprotein L                                                            |
| 218 | Q6NTA2           | 16                   | 68             | 40.5                  | 558    | 60233  | 7.1  | HNRPL protein                                                                                        |
| 218 | UPI0000D6179A    | 16                   | 68             | 38.4                  | 589    | 64195  | 8.3  | Heterogeneous nuclear ribonucleoprotein L (hnRNP L).                                                 |
| 218 | UPI00004432FA    | 16                   | 68             | 38.4                  | 589    | 64133  | 8.2  | heterogeneous nuclear ribonucleoprotein L isoform a                                                  |
| 219 | P23526           | 16                   | 61             | 39.1                  | 432    | 47716  | 6.3  | Adenosylhomocysteinase                                                                               |
| 220 | UPI0000D6261A    | 16                   | 88             | 36.3                  | 435    | 49917  | 6.7  | Elongation factor 1-gamma (EF-1-gamma) (eEF-1B gamma).                                               |
| 220 | P26641           | 16                   | 88             | 36.2                  | 437    | 50119  | 6.7  | Elongation factor 1-gamma                                                                            |
| 220 | UPI0000D6261B    | 16                   | 88             | 36.2                  | 436    | 50016  | 6.7  | Elongation factor 1-gamma (EF-1-gamma) (eEF-1B gamma).                                               |
| 221 | P08195           | 16                   | 213            | 36.1                  | 529    | 57945  | 5.3  | 4F2 cell-surface antigen heavy chain                                                                 |
| 221 | UPI0000405902    | 16                   | 213            | 31.9                  | 599    | 64873  | 5.1  | solute carrier family 3 (activators of dibasic and neutral amino acid transport), member 2 isoform d |
| 221 | UPI00004EC298    | 16                   | 213            | 30.3                  | 631    | 68101  | 5    | solute carrier family 3 (activators of dibasic and neutral amino acid transport), member 2 isoform b |
| 221 | UPI000013E757    | 16                   | 213            | 30.3                  | 630    | 67994  | 5    | solute carrier family 3 (activators of dibasic and neutral amino acid transport), member 2 isoform c |
| 221 | UPI00004EC297    | 16                   | 213            | 28.9                  | 661    | 71123  | 5    | solute carrier family 3 (activators of dibasic and neutral amino acid transport), member 2 isoform a |
| 222 | P00367           | 16                   | 46             | 36                    | 558    | 61398  | 7.8  | Glutamate dehydrogenase 1, mitochondrial precursor                                                   |
| 223 | P13797           | 16                   | 54             | 32.5                  | 627    | 70436  | 5.8  | Plastin-3                                                                                            |
| 223 | UPI000000D962    | 16                   | 54             | 32.4                  | 630    | 70811  | 5.6  | plastin 3                                                                                            |
| 224 | Q8NBJ5           | 16                   | 101            | 28.6                  | 622    | 71636  | 7.3  | Glycosyltransferase 25 domain-containing protein 1                                                   |
| 225 | UPI0000161BCB    | 16                   | 43             | 28.6                  | 681    | 76747  | 6.9  | glucosamine-fructose-6-phosphate aminotransferase                                                    |



| No. | Accession Number | Unique Peptide Count | Spectrum Count | Sequence Coverage (%) | Length | MolWt  | pI  | Descriptive Name                                                                                                                                                                                |
|-----|------------------|----------------------|----------------|-----------------------|--------|--------|-----|-------------------------------------------------------------------------------------------------------------------------------------------------------------------------------------------------|
| 225 | Q06210-2         | 16                   | 43             | 28.6                  | 681    | 76759  | 6.9 | Isoform 2 of Q06210                                                                                                                                                                             |
| 225 | Q06210           | 16                   | 43             | 27.9                  | 699    | 78806  | 7.1 | Glucosamine--fructose-6-phosphate aminotransferase [isomerizing] 1                                                                                                                              |
| 226 | UPI0000161B4F    | 16                   | 95             | 29.6                  | 685    | 77531  | 6.2 | Glycyl-tRNA synthetase (EC 6.1.1.14) (Glycine--tRNA ligase) (GlyRS).                                                                                                                            |
| 226 | P41250           | 16                   | 95             | 27.5                  | 739    | 83140  | 7   | Glycyl-tRNA synthetase                                                                                                                                                                          |
| 226 | UPI00005A885C    | 16                   | 95             | 27.5                  | 739    | 83166  | 7   | glycyl-tRNA synthetase                                                                                                                                                                          |
| 227 | P35606           | 16                   | 76             | 25.2                  | 906    | 102487 | 5.3 | Coatomer subunit beta'                                                                                                                                                                          |
| 228 | Q12797           | 16                   | 141            | 25.1                  | 758    | 85863  | 5   | Aspartyl/asparaginyl beta-hydroxylase                                                                                                                                                           |
| 228 | UPI0000D624CD    | 16                   | 141            | 25                    | 759    | 86006  | 5.1 | Aspartyl/asparaginyl beta-hydroxylase (EC 1.14.11.16) (Aspartate beta- hydroxylase) (ASP beta-hydroxylase) (Peptide-aspartate beta- dioxygenase).                                               |
| 229 | O43491           | 16                   | 43             | 22.1                  | 1005   | 112588 | 5.4 | Band 4.1-like protein 2                                                                                                                                                                         |
| 230 | Q5T665           | 16                   | 70             | 21.2                  | 956    | 106077 | 8.3 | Inter-alpha inhibitor H5                                                                                                                                                                        |
| 230 | UPI00003B5D4F    | 16                   | 70             | 21.2                  | 956    | 106017 | 8.3 | inter-alpha trypsin inhibitor heavy chain precursor 5 isoform 1                                                                                                                                 |
| 231 | Q9P2J5           | 16                   | 45             | 17.4                  | 1176   | 134466 | 7.3 | Leucyl-tRNA synthetase, cytoplasmic                                                                                                                                                             |
| 232 | O60610           | 16                   | 52             | 15.4                  | 1248   | 138978 | 5.4 | Protein diaphanous homolog 1                                                                                                                                                                    |
| 232 | UPI0000EA87E7    | 16                   | 52             | 15.2                  | 1263   | 140289 | 5.4 | diaphanous 1 isoform 2                                                                                                                                                                          |
| 232 | UPI0000DBEE89    | 16                   | 52             | 15.2                  | 1263   | 140255 | 5.4 | Protein diaphanous homolog 1 (Diaphanous-related formin-1) (DRF1).                                                                                                                              |
| 232 | UPI0000DBEE88    | 16                   | 52             | 15.2                  | 1264   | 140416 | 5.4 | Protein diaphanous homolog 1 (Diaphanous-related formin-1) (DRF1).                                                                                                                              |
| 232 | Q17RN4           | 16                   | 52             | 15.2                  | 1262   | 140192 | 5.4 | Diaphanous homolog 1                                                                                                                                                                            |
| 232 | Q6URC4           | 16                   | 52             | 15.1                  | 1272   | 141303 | 5.5 | Diaphanous 1                                                                                                                                                                                    |
| 232 | Q59FH8           | 16                   | 52             | 14.8                  | 1299   | 143786 | 5.4 | Diaphanous 1 variant                                                                                                                                                                            |
| 233 | Q15021           | 16                   | 57             | 15.4                  | 1401   | 157168 | 6.6 | Condensin complex subunit 1                                                                                                                                                                     |
| 233 | UPI000013C8CA    | 16                   | 57             | 15.4                  | 1401   | 157182 | 6.6 | Condensin complex subunit 1 (Non-SMC condensin I complex subunit D2) (Chromosome condensation-related SMC-associated protein 1) (Chromosome-associated protein D2) (hCAP-D2) (XCAP-D2 homolog). |
| 234 | Q06830           | 15                   | 171            | 72.9                  | 199    | 22110  | 8.1 | Peroxiredoxin-1                                                                                                                                                                                 |
| 235 | P35232           | 15                   | 154            | 70.2                  | 272    | 29804  | 5.8 | Prohibitin                                                                                                                                                                                      |
| 235 | Q6FHP5           | 15                   | 154            | 70.2                  | 272    | 29832  | 5.8 | PHB protein                                                                                                                                                                                     |
| 236 | UPI00001AF1AB    | 15                   | 53             | 68.6                  | 389    | 42931  | 5.3 | Interleukin enhancer-binding factor 2 (Nuclear factor of activated T-cells 45 kDa).                                                                                                             |
| 236 | Q12905           | 15                   | 53             | 68.5                  | 390    | 43062  | 5.3 | Interleukin enhancer-binding factor 2                                                                                                                                                           |
| 237 | P21796           | 15                   | 227            | 67.8                  | 283    | 30773  | 8.5 | Voltage-dependent anion-selective channel protein 1                                                                                                                                             |
| 238 | P04406           | 15                   | 1418           | 64.5                  | 335    | 36053  | 8.5 | Glyceraldehyde-3-phosphate dehydrogenase                                                                                                                                                        |
| 239 | O15144           | 15                   | 110            | 58.3                  | 300    | 34333  | 7.3 | Actin-related protein 2/3 complex subunit 2                                                                                                                                                     |
| 240 | P61247           | 15                   | 291            | 54.2                  | 264    | 29945  | 9.7 | 40S ribosomal protein S3a                                                                                                                                                                       |
| 240 | Q6NXR8           | 15                   | 291            | 54.2                  | 264    | 29975  | 9.7 | Ribosomal protein S3A                                                                                                                                                                           |
| 241 | P62136           | 15                   | 88             | 53.9                  | 330    | 37512  | 6.3 | Serine/threonine-protein phosphatase PP1-alpha catalytic subunit                                                                                                                                |

| No. | Accession Number | Unique Peptide Count | Spectrum Count | Sequence Coverage (%) | Length | MolWt  | pI   | Descriptive Name                                                                                                                        |
|-----|------------------|----------------------|----------------|-----------------------|--------|--------|------|-----------------------------------------------------------------------------------------------------------------------------------------|
| 242 | UPI00006D1D75    | 15                   | 191            | 56.6                  | 320    | 34223  | 9.2  | Heterogeneous nuclear ribonucleoprotein A1 (Helix-destabilizing protein) (Single-strand RNA-binding protein) (hnRNP core protein A1).   |
| 242 | P49312           | 15                   | 191            | 56.6                  | 320    | 34196  | 9.2  | Heterogeneous nuclear ribonucleoprotein A1                                                                                              |
| 242 | P09651           | 15                   | 191            | 48.7                  | 372    | 38846  | 9.2  | Heterogeneous nuclear ribonucleoprotein A1                                                                                              |
| 242 | UPI0000161BF2    | 15                   | 191            | 48.7                  | 372    | 38747  | 9.1  | heterogeneous nuclear ribonucleoprotein A1 isoform b                                                                                    |
| 243 | P26599           | 15                   | 104            | 43.5                  | 531    | 57221  | 9.2  | Polypyrimidine tract-binding protein 1                                                                                                  |
| 243 | P26599-2         | 15                   | 104            | 42                    | 550    | 59037  | 9.2  | Isoform 2 of P26599                                                                                                                     |
| 243 | UPI0000D616E2    | 15                   | 104            | 41.5                  | 557    | 59693  | 9.2  | Polypyrimidine tract-binding protein 1 (PTB) (Heterogeneous nuclear ribonucleoprotein I) (hnRNP I) (57 kDa RNA-binding protein PPTB-1). |
| 243 | Q9BUQ0           | 15                   | 104            | 41.5                  | 557    | 59633  | 9.2  | Polypyrimidine tract binding protein 1                                                                                                  |
| 244 | Q59ET3           | 15                   | 126            | 42.5                  | 529    | 57762  | 6.7  | Chaperonin containing TCP1, subunit 6A isoform a variant                                                                                |
| 244 | P40227           | 15                   | 126            | 42.4                  | 531    | 58024  | 6.7  | T-complex protein 1 subunit zeta                                                                                                        |
| 245 | Q16555           | 15                   | 97             | 42                    | 572    | 62294  | 6.4  | Dihydropyrimidinase-related protein 2                                                                                                   |
| 245 | Q59GB4           | 15                   | 97             | 38.2                  | 628    | 68184  | 6.2  | Dihydropyrimidinase-like 2 variant                                                                                                      |
| 246 | P12081           | 15                   | 36             | 39.3                  | 509    | 57411  | 5.9  | Histidyl-tRNA synthetase, cytoplasmic                                                                                                   |
| 247 | UPI000013EC8B    | 15                   | 129            | 39                    | 426    | 47566  | 11.1 | 60S ribosomal protein L4 (L1).                                                                                                          |
| 247 | P36578           | 15                   | 129            | 38.9                  | 427    | 47697  | 11.1 | 60S ribosomal protein L4                                                                                                                |
| 247 | Q59GY2           | 15                   | 129            | 37.6                  | 441    | 48996  | 11   | Ribosomal protein L4 variant                                                                                                            |
| 248 | Q6DD88           | 15                   | 69             | 38.4                  | 541    | 60542  | 5.7  | DKFZP564J0863 protein                                                                                                                   |
| 249 | Q9Y230           | 15                   | 54             | 36.9                  | 463    | 51157  | 5.6  | RuvB-like 2                                                                                                                             |
| 250 | O94925           | 15                   | 55             | 33.5                  | 669    | 73461  | 7.8  | Glutaminase kidney isoform, mitochondrial precursor                                                                                     |
| 250 | UPI0000163E16    | 15                   | 55             | 33.5                  | 669    | 73427  | 7.8  | glutaminase C                                                                                                                           |
| 251 | P38606           | 15                   | 50             | 32.7                  | 617    | 68304  | 5.5  | Vacuolar ATP synthase catalytic subunit A                                                                                               |
| 252 | Q53HQ1           | 15                   | 111            | 31.7                  | 564    | 66696  | 6.2  | Eukaryotic translation initiation factor 3 subunit 6 interacting protein variant                                                        |
| 252 | Q9Y262           | 15                   | 111            | 31.7                  | 564    | 66727  | 6.3  | Eukaryotic translation initiation factor 3 subunit 6-interacting protein                                                                |
| 252 | Q5QTR1           | 15                   | 111            | 31.7                  | 564    | 66739  | 6.3  | MSTP005                                                                                                                                 |
| 252 | Q53HT4           | 15                   | 111            | 31.7                  | 564    | 66753  | 6.3  | Eukaryotic translation initiation factor 3 subunit 6 interacting protein variant                                                        |
| 252 | Q6ICD2           | 15                   | 111            | 29.5                  | 607    | 70902  | 6.7  | DJ1014D13.1 protein                                                                                                                     |
| 253 | Q16891-2         | 15                   | 66             | 26.8                  | 747    | 82625  | 6.6  | Isoform 2 of Q16891                                                                                                                     |
| 253 | Q16891           | 15                   | 66             | 26.4                  | 758    | 83678  | 6.5  | Mitochondrial inner membrane protein                                                                                                    |
| 253 | UPI0000456DEF    | 15                   | 66             | 26.4                  | 758    | 83847  | 6.5  | Mitochondrial inner membrane protein (Mitofilin) (p87/89) (Proliferation-inducing gene 4 protein).                                      |
| 253 | UPI000006DE12    | 15                   | 66             | 26.4                  | 758    | 83668  | 6.5  | inner membrane protein, mitochondrial                                                                                                   |
| 254 | P35221           | 15                   | 72             | 26                    | 906    | 100071 | 6.3  | Catenin alpha-1                                                                                                                         |
| 255 | Q32MZ4-3         | 15                   | 72             | 25.8                  | 752    | 82689  | 4.6  | Isoform 3 of Q32MZ4                                                                                                                     |

| No. | Accession Number | Unique Peptide Count | Spectrum Count | Sequence Coverage (%) | Length | MolWt  | pI   | Descriptive Name                                                                  |
|-----|------------------|----------------------|----------------|-----------------------|--------|--------|------|-----------------------------------------------------------------------------------|
| 255 | UPI000006DC73    | 15                   | 72             | 24.7                  | 784    | 86438  | 4.7  | leucine rich repeat (in FLII) interacting protein 1                               |
| 255 | Q32MZ4-2         | 15                   | 72             | 24.7                  | 784    | 86404  | 4.7  | Isoform 2 of Q32MZ4                                                               |
| 255 | Q32MZ4           | 15                   | 72             | 24                    | 808    | 89253  | 4.7  | Leucine-rich repeat flightless-interacting protein 1                              |
| 256 | Q13263           | 15                   | 72             | 22.2                  | 835    | 88550  | 5.8  | Transcription intermediary factor 1-beta                                          |
| 257 | Q8TDQ5           | 15                   | 68             | 22                    | 788    | 89187  | 5.8  | Arsenite-resistant protein ASR2                                                   |
| 257 | A4D2E6           | 15                   | 68             | 21.7                  | 796    | 90251  | 5.7  | Arsenate resistance protein ARS2                                                  |
| 257 | Q6NT74           | 15                   | 68             | 21.3                  | 812    | 92194  | 5.8  | ARS2 protein                                                                      |
| 257 | Q32MI4           | 15                   | 68             | 19.9                  | 871    | 100147 | 6    | ARS2 protein                                                                      |
| 257 | A4D2E5           | 15                   | 68             | 19.8                  | 875    | 100537 | 6    | Arsenate resistance protein ARS2                                                  |
| 257 | Q9BXP5-2         | 15                   | 68             | 19.8                  | 872    | 100276 | 6    | Isoform B of Q9BXP5                                                               |
| 257 | Q9BXP5           | 15                   | 68             | 19.7                  | 876    | 100667 | 6    | Arsenite-resistance protein 2                                                     |
| 257 | UPI000013C800    | 15                   | 68             | 19.6                  | 884    | 101567 | 6.1  | Arsenite-resistance protein 2.                                                    |
| 258 | P17301           | 15                   | 40             | 15.7                  | 1181   | 129295 | 5.3  | Integrin alpha-2 precursor                                                        |
| 258 | UPI0000169C36    | 15                   | 40             | 15.7                  | 1181   | 129296 | 5.3  | integrin alpha 2 precursor                                                        |
| 259 | P29144           | 15                   | 33             | 15.2                  | 1249   | 138349 | 6.3  | Tripeptidyl-peptidase 2                                                           |
| 259 | UPI0000137276    | 15                   | 33             | 15.2                  | 1249   | 138449 | 6.4  | tripeptidyl peptidase II                                                          |
| 260 | Q7L576           | 15                   | 98             | 14                    | 1253   | 145182 | 6.9  | Cytoplasmic FMR1-interacting protein 1                                            |
| 261 | Q13428           | 15                   | 38             | 10.8                  | 1488   | 152103 | 9    | Treacle protein                                                                   |
| 261 | Q13428-3         | 15                   | 38             | 10.7                  | 1489   | 152203 | 9    | Isoform 3 of Q13428                                                               |
| 261 | Q13428-4         | 15                   | 38             | 10.5                  | 1524   | 155926 | 8.9  | Isoform 4 of Q13428                                                               |
| 262 | P46013-2         | 15                   | 82             | 6.2                   | 2896   | 319444 | 9.5  | Isoform Short of P46013                                                           |
| 262 | P46013           | 15                   | 82             | 5.6                   | 3256   | 358695 | 9.4  | Antigen KI-67                                                                     |
| 263 | Q5T4S7           | 15                   | 46             | 3.9                   | 5183   | 573849 | 6    | Zinc finger UBR1-type protein 1                                                   |
| 263 | Q8TDN5           | 15                   | 46             | 3.9                   | 5183   | 573909 | 6    | P600                                                                              |
| 264 | Q99714           | 14                   | 80             | 75.9                  | 261    | 26923  | 7.8  | 3-hydroxyacyl-CoA dehydrogenase type-2                                            |
| 265 | P62258           | 14                   | 240            | 69.4                  | 255    | 29174  | 4.7  | 14-3-3 protein epsilon                                                            |
| 266 | P30041           | 14                   | 113            | 66.5                  | 224    | 25035  | 6.4  | Peroxiredoxin-6                                                                   |
| 267 | P23919           | 14                   | 53             | 57.5                  | 212    | 23819  | 8.3  | Thymidylate kinase                                                                |
| 268 | P05141           | 14                   | 196            | 53.7                  | 298    | 32895  | 9.7  | ADP/ATP translocase 2                                                             |
| 269 | UPI0000247080    | 14                   | 361            | 48                    | 352    | 37298  | 9.1  | Heterogeneous nuclear ribonucleoproteins A2/B1 (hnRNP A2 / hnRNP B1).             |
| 269 | P22626           | 14                   | 361            | 47.9                  | 353    | 37430  | 8.9  | Heterogeneous nuclear ribonucleoproteins A2/B1                                    |
| 270 | Q02878           | 14                   | 93             | 45.1                  | 288    | 32728  | 10.6 | 60S ribosomal protein L6                                                          |
| 270 | Q8TBK5           | 14                   | 93             | 45.1                  | 288    | 32742  | 10.6 | Ribosomal protein L6                                                              |
| 270 | Q8N5Z7           | 14                   | 93             | 45.1                  | 288    | 32726  | 10.6 | Ribosomal protein L6                                                              |
| 270 | Q9HBB3           | 14                   | 93             | 45                    | 289    | 32891  | 10.6 | DNA-binding protein TAXREB107                                                     |
| 271 | Q9NTK5           | 14                   | 47             | 43.2                  | 396    | 44744  | 7.8  | Putative GTP-binding protein 9                                                    |
| 272 | Q15084           | 14                   | 134            | 43                    | 440    | 48121  | 5.1  | Protein disulfide-isomerase A6 precursor                                          |
| 272 | Q15084-2         | 14                   | 134            | 38.4                  | 492    | 53901  | 5.3  | Isoform 2 of Q15084                                                               |
| 273 | P09543           | 14                   | 45             | 42.5                  | 421    | 47579  | 9.1  | 2',3'-cyclic-nucleotide 3'-phosphodiesterase                                      |
| 274 | UPI0000134091    | 14                   | 100            | 38.6                  | 402    | 45978  | 10.2 | 60S ribosomal protein L3 (HIV-1 TAR RNA-binding protein B) (TARBP-B).             |
| 274 | P39023           | 14                   | 100            | 38.5                  | 403    | 46109  | 10.2 | 60S ribosomal protein L3                                                          |
| 275 | O00148           | 14                   | 76             | 36.8                  | 427    | 49130  | 5.7  | ATP-dependent RNA helicase DDX39                                                  |
| 276 | UPI0000E9BBC7    | 14                   | 117            | 32.5                  | 582    | 64677  | 5.2  | Protein phosphatase 2                                                             |
| 276 | P30153           | 14                   | 117            | 32.1                  | 589    | 65309  | 5.1  | Serine/threonine-protein phosphatase 2A 65 kDa regulatory subunit A alpha isoform |

| No. | Accession Number | Unique Peptide Count | Spectrum Count | Sequence Coverage (%) | Length | MolWt  | pI  | Descriptive Name                                                                                                                                                                                                                                                                                                  |
|-----|------------------|----------------------|----------------|-----------------------|--------|--------|-----|-------------------------------------------------------------------------------------------------------------------------------------------------------------------------------------------------------------------------------------------------------------------------------------------------------------------|
| 277 | Q92841           | 14                   | 51             | 35.8                  | 650    | 72372  | 8.6 | Probable ATP-dependent RNA helicase DDX17                                                                                                                                                                                                                                                                         |
| 277 | Q92841-3         | 14                   | 51             | 35.7                  | 652    | 72557  | 8.7 | Isoform 3 of Q92841                                                                                                                                                                                                                                                                                               |
| 277 | UPI00003670EA    | 14                   | 51             | 32                    | 729    | 80255  | 8.3 | Probable ATP-dependent RNA helicase DDX17 (EC 3.6.1.-) (DEAD box protein 17) (RNA-dependent helicase p72) (DEAD box protein p72).                                                                                                                                                                                 |
| 277 | UPI000021BFBA    | 14                   | 51             | 32                    | 729    | 80273  | 8.3 | DEAD box polypeptide 17 isoform p82                                                                                                                                                                                                                                                                               |
| 277 | Q59F66           | 14                   | 51             | 31.6                  | 737    | 81068  | 7.9 | DEAD box polypeptide 17 isoform p82 variant                                                                                                                                                                                                                                                                       |
| 278 | P55084           | 14                   | 42             | 31.4                  | 474    | 51294  | 9.4 | Trifunctional enzyme subunit beta, mitochondrial precursor (TP-beta) [Includes: 3-ketoacyl-CoA thiolase (EC 2.3.1.16) (Acetyl-CoA acyltransferase) (Beta-ketothiolase)]                                                                                                                                           |
| 278 | Q5R1W7           | 14                   | 42             | 31.4                  | 475    | 51396  | 9.4 | Trifunctional enzyme subunit beta, mitochondrial precursor (TP-beta) [Includes: 3-ketoacyl-CoA thiolase (EC 2.3.1.16) (Acetyl-CoA acyltransferase) (Beta-ketothiolase)]                                                                                                                                           |
| 279 | Q96AY3           | 14                   | 64             | 30.2                  | 582    | 64245  | 5.6 | FK506-binding protein 10 precursor                                                                                                                                                                                                                                                                                |
| 279 | UPI000015C65C    | 14                   | 64             | 30.2                  | 582    | 64305  | 5.6 | FK506 binding protein 10, 65 kDa                                                                                                                                                                                                                                                                                  |
| 280 | Q10471           | 14                   | 63             | 27.3                  | 571    | 64733  | 8.4 | Polypeptide N-acetylgalactosaminyltransferase 2 (EC 2.4.1.41) (Protein-UDP acetylgalactosaminyltransferase 2) (UDP-GalNAc:polypeptide N-acetylgalactosaminyltransferase 2) (Polypeptide GalNAc transferase 2) (GalNAc-T2) (pp-GaNTase 2) [Contains: Polypeptide N-acetylgalactosaminyltransferase 2 soluble form] |
| 281 | Q92499           | 14                   | 54             | 25.1                  | 740    | 82432  | 7.2 | ATP-dependent RNA helicase DDX1                                                                                                                                                                                                                                                                                   |
| 282 | Q15046           | 14                   | 42             | 25                    | 597    | 68048  | 6.4 | Lysyl-tRNA synthetase                                                                                                                                                                                                                                                                                             |
| 282 | UPI00001405CB    | 14                   | 42             | 23.8                  | 625    | 71497  | 6.8 | Lysyl-tRNA synthetase (EC 6.1.1.6) (Lysine--tRNA ligase) (LysRS).                                                                                                                                                                                                                                                 |
| 282 | Q9HB23           | 14                   | 42             | 23.8                  | 625    | 71384  | 6.7 | Lysyl-tRNA synthetase                                                                                                                                                                                                                                                                                             |
| 283 | P49915           | 14                   | 50             | 24.5                  | 693    | 76715  | 6.9 | GMP synthase [glutamine-hydrolyzing]                                                                                                                                                                                                                                                                              |
| 284 | Q9NR30           | 14                   | 57             | 22.7                  | 783    | 87344  | 9.3 | Nucleolar RNA helicase 2                                                                                                                                                                                                                                                                                          |
| 285 | P46087           | 14                   | 35             | 21.2                  | 812    | 89302  | 9.2 | Putative RNA methyltransferase NOL1                                                                                                                                                                                                                                                                               |
| 285 | Q3KQS4           | 14                   | 35             | 20.4                  | 845    | 92860  | 9.2 | NOL1 protein                                                                                                                                                                                                                                                                                                      |
| 285 | UPI0000D62194    | 14                   | 35             | 20.3                  | 846    | 92974  | 9.2 | Proliferating-cell nucleolar antigen p120 (Proliferation-associated nucleolar protein p120).                                                                                                                                                                                                                      |
| 285 | UPI00004565C2    | 14                   | 35             | 20.1                  | 855    | 94098  | 9.2 | Proliferating-cell nucleolar antigen p120 (Proliferation-associated nucleolar protein p120).                                                                                                                                                                                                                      |
| 286 | Q99460-2         | 14                   | 42             | 21.6                  | 922    | 102258 | 5.3 | Isoform 2 of Q99460                                                                                                                                                                                                                                                                                               |

| No. | Accession Number | Unique Peptide Count | Spectrum Count | Sequence Coverage (%) | Length | MolWt  | pI  | Descriptive Name                                                                                                                                                      |
|-----|------------------|----------------------|----------------|-----------------------|--------|--------|-----|-----------------------------------------------------------------------------------------------------------------------------------------------------------------------|
| 286 | Q99460           | 14                   | 42             | 20.9                  | 953    | 105836 | 5.4 | 26S proteasome non-ATPase regulatory subunit 1                                                                                                                        |
| 287 | Q13435           | 14                   | 43             | 20                    | 872    | 97657  | 5.7 | Splicing factor 3B subunit 2                                                                                                                                          |
| 287 | Q7Z627           | 14                   | 43             | 19.8                  | 877    | 98116  | 5.5 | SF3B2 protein                                                                                                                                                         |
| 287 | Q9BWD2           | 14                   | 43             | 19.5                  | 894    | 100097 | 5.7 | SF3B2 protein                                                                                                                                                         |
| 288 | Q9Y5B9           | 14                   | 64             | 17.3                  | 1047   | 119914 | 5.7 | FACT complex subunit SPT16                                                                                                                                            |
| 289 | O14617-5         | 14                   | 51             | 16.5                  | 1215   | 136651 | 7.6 | Isoform 5 of O14617                                                                                                                                                   |
| 290 | O75694           | 14                   | 45             | 13.8                  | 1391   | 155199 | 6.2 | Nuclear pore complex protein Nup155                                                                                                                                   |
| 291 | Q9HD20-2         | 14                   | 40             | 15.1                  | 1086   | 121110 | 7.8 | Isoform B of Q9HD20                                                                                                                                                   |
| 291 | Q9HD20           | 14                   | 40             | 13.6                  | 1204   | 132955 | 8.1 | Probable cation-transporting ATPase 13A1                                                                                                                              |
| 292 | P11388           | 14                   | 44             | 13.1                  | 1531   | 174384 | 8.7 | DNA topoisomerase 2-alpha                                                                                                                                             |
| 292 | P11388-2         | 14                   | 44             | 12.9                  | 1557   | 177500 | 8.8 | Isoform 2 of P11388                                                                                                                                                   |
| 292 | UPI0000D6231D    | 14                   | 44             | 12.8                  | 1568   | 178882 | 8.7 | TOP2A_HUMAN Isoform 2 of P11388 - Homo sapiens (Human)                                                                                                                |
| 292 | P11388-3         | 14                   | 44             | 12.8                  | 1567   | 178711 | 8.8 | Isoform 3 of P11388                                                                                                                                                   |
| 292 | P11388-4         | 14                   | 44             | 12.5                  | 1612   | 182680 | 8.6 | Isoform 4 of P11388                                                                                                                                                   |
| 293 | P55265-3         | 14                   | 28             | 13.5                  | 1181   | 131099 | 8.6 | Isoform 3 of P55265                                                                                                                                                   |
| 293 | P55265-2         | 14                   | 28             | 13.2                  | 1200   | 133203 | 8.5 | Isoform 2 of P55265                                                                                                                                                   |
| 293 | P55265           | 14                   | 28             | 13                    | 1226   | 135995 | 8.6 | Double-stranded RNA-specific adenosine deaminase                                                                                                                      |
| 293 | Q59EC0           | 14                   | 28             | 12.8                  | 1244   | 137833 | 8.5 | Adenosine deaminase, RNA-specific isoform ADAR-a variant                                                                                                              |
| 294 | Q14160           | 14                   | 24             | 11.5                  | 1630   | 174930 | 5.1 | Protein LAP4                                                                                                                                                          |
| 294 | UPI00001408BD    | 14                   | 24             | 11.5                  | 1630   | 174884 | 5.1 | Protein LAP4 (Protein scribble homolog) (hScrib).                                                                                                                     |
| 294 | UPI0000D62517    | 14                   | 24             | 11.4                  | 1654   | 177194 | 5.1 | Protein LAP4 (Protein scribble homolog) (hScrib).                                                                                                                     |
| 294 | UPI00004576FD    | 14                   | 24             | 11.4                  | 1655   | 177693 | 5.1 | Protein LAP4 (Protein scribble homolog) (hScrib).                                                                                                                     |
| 294 | Q14160-4         | 14                   | 24             | 11.4                  | 1654   | 177240 | 5.1 | Isoform 4 of Q14160                                                                                                                                                   |
| 294 | Q14160-3         | 14                   | 24             | 11.4                  | 1655   | 177739 | 5.1 | Isoform 3 of Q14160                                                                                                                                                   |
| 295 | P26358           | 14                   | 34             | 11                    | 1616   | 183164 | 7.8 | DNA (cytosine-5)-methyltransferase 1                                                                                                                                  |
| 295 | A0AV63           | 14                   | 34             | 10.8                  | 1632   | 184818 | 7.9 | DNMT1 protein                                                                                                                                                         |
| 296 | UPI0000DD79CB    | 14                   | 37             | 8.8                   | 1808   | 203142 | 4.8 | PREDICTED: similar to melanoma inhibitory activity 3 isoform 14                                                                                                       |
| 296 | UPI0000DD7931    | 14                   | 37             | 8.8                   | 1808   | 203141 | 4.8 | PREDICTED: similar to melanoma inhibitory activity 3 isoform 3                                                                                                        |
| 296 | Q5JRA6           | 14                   | 37             | 8.4                   | 1907   | 213700 | 4.8 | Melanoma inhibitory activity family member 3                                                                                                                          |
| 296 | UPI00006C03EC    | 14                   | 37             | 8.4                   | 1907   | 213701 | 4.8 | PREDICTED: similar to melanoma inhibitory activity 3 isoform 1                                                                                                        |
| 297 | UPI000013F255    | 14                   | 46             | 8.6                   | 1972   | 218524 | 8.1 | colonic and hepatic tumor over-expressed protein isoform b                                                                                                            |
| 297 | Q0VAX8           | 14                   | 46             | 8.3                   | 2032   | 225493 | 7.8 | Cytoskeleton associated protein 5                                                                                                                                     |
| 297 | Q14008           | 14                   | 46             | 8.3                   | 2032   | 225507 | 7.9 | Cytoskeleton-associated protein 5                                                                                                                                     |
| 298 | Q7Z6Z7           | 14                   | 54             | 4.1                   | 4374   | 481896 | 5.2 | E3 ubiquitin-protein ligase HUWE1                                                                                                                                     |
| 298 | UPI0000D626C3    | 14                   | 54             | 4.1                   | 4374   | 481985 | 5.2 | HECT, UBA and WWE domain-containing protein 1 (EC 6.3.2.-) (E3 ubiquitin protein ligase URE-B1) (Mcl-1 ubiquitin ligase E3) (Mule) (ARF-binding protein 1) (ARF-BP1). |
| 298 | Q7Z6Z7-3         | 14                   | 54             | 4.1                   | 4365   | 481023 | 5.2 | Isoform 3 of Q7Z6Z7                                                                                                                                                   |

| No. | Accession Number | Unique Peptide Count | Spectrum Count | Sequence Coverage (%) | Length | MolWt  | pI   | Descriptive Name                                                                                                                                                                                   |
|-----|------------------|----------------------|----------------|-----------------------|--------|--------|------|----------------------------------------------------------------------------------------------------------------------------------------------------------------------------------------------------|
| 298 | Q7Z6Z7-2         | 14                   | 54             | 4.1                   | 4358   | 480203 | 5.2  | Isoform 2 of Q7Z6Z7                                                                                                                                                                                |
| 299 | P61106           | 13                   | 94             | 73.5                  | 215    | 23897  | 6.2  | Ras-related protein Rab-14                                                                                                                                                                         |
| 300 | P51149           | 13                   | 172            | 72.9                  | 207    | 23490  | 6.7  | Ras-related protein Rab-7a                                                                                                                                                                         |
| 301 | Q5R370           | 13                   | 87             | 72.4                  | 185    | 21228  | 7.9  | Calcyclin binding protein                                                                                                                                                                          |
| 301 | Q9HB71           | 13                   | 87             | 58.8                  | 228    | 26210  | 8.2  | Calcyclin-binding protein                                                                                                                                                                          |
| 302 | P37802           | 13                   | 305            | 70.4                  | 199    | 22391  | 8.2  | Transgelin-2                                                                                                                                                                                       |
| 302 | UPI000013D3E3    | 13                   | 305            | 63.6                  | 220    | 24454  | 8.2  | Transgelin-2 (SM22-alpha homolog).                                                                                                                                                                 |
| 303 | Q9UJZ1           | 13                   | 57             | 62.1                  | 356    | 38534  | 7.4  | Stomatin-like protein 2                                                                                                                                                                            |
| 304 | Q5RLJ0           | 13                   | 57             | 61.9                  | 244    | 27969  | 6.4  | CLE                                                                                                                                                                                                |
| 304 | Q9Y224           | 13                   | 57             | 61.9                  | 244    | 28068  | 6.7  | Protein C14orf166                                                                                                                                                                                  |
| 305 | Q15365           | 13                   | 112            | 60.4                  | 356    | 37498  | 7.1  | Poly(rC)-binding protein 1                                                                                                                                                                         |
| 305 | UPI00001313C8    | 13                   | 112            | 60.4                  | 356    | 37526  | 7.1  | poly(rC) binding protein 1                                                                                                                                                                         |
| 306 | P05388           | 13                   | 114            | 59                    | 317    | 34274  | 6    | 60S acidic ribosomal protein P0                                                                                                                                                                    |
| 306 | Q53HW2           | 13                   | 114            | 59                    | 317    | 34302  | 6    | Ribosomal protein P0 variant                                                                                                                                                                       |
| 307 | P04899           | 13                   | 56             | 51.3                  | 355    | 40451  | 5.5  | Guanine nucleotide-binding protein G(i), alpha-2 subunit                                                                                                                                           |
| 308 | P15880           | 13                   | 70             | 50.2                  | 293    | 31324  | 10.2 | 40S ribosomal protein S2                                                                                                                                                                           |
| 308 | UPI000013EEA4    | 13                   | 70             | 50.2                  | 293    | 31438  | 10.2 | similar to ribosomal protein S2 (LOC646294), mRNA                                                                                                                                                  |
| 309 | Q5VU66           | 13                   | 112            | 50                    | 248    | 28870  | 4.8  | Tropomyosin 3                                                                                                                                                                                      |
| 309 | UPI0000D61FF9    | 13                   | 112            | 50                    | 248    | 28916  | 4.8  | Tropomyosin alpha-3 chain (Tropomyosin-3) (Tropomyosin gamma) (hTM5).                                                                                                                              |
| 310 | P00387           | 13                   | 54             | 48.8                  | 301    | 34235  | 7.6  | NADH-cytochrome b5 reductase (EC 1.6.2.2) (B5R) (Diaphorase-1) (Cytochrome b5 reductase 3) [Contains: NADH-cytochrome b5 reductase membrane-bound form; NADH-cytochrome b5 reductase soluble form] |
| 311 | Q5T7C4           | 13                   | 106            | 65.2                  | 158    | 18311  | 9.7  | High-mobility group box 1                                                                                                                                                                          |
| 311 | Q5T7C6           | 13                   | 106            | 63.6                  | 162    | 18808  | 9.7  | High-mobility group box 1                                                                                                                                                                          |
| 311 | Q59GW1           | 13                   | 106            | 58.5                  | 176    | 20164  | 9.7  | High-mobility group box 1 variant                                                                                                                                                                  |
| 311 | P09429           | 13                   | 106            | 47.9                  | 215    | 24894  | 5.7  | High mobility group protein B1                                                                                                                                                                     |
| 311 | Q14321           | 13                   | 106            | 47.9                  | 215    | 24993  | 5.9  | HMG-1                                                                                                                                                                                              |
| 312 | P05198           | 13                   | 37             | 46                    | 315    | 36112  | 5.1  | Eukaryotic translation initiation factor 2 subunit 1                                                                                                                                               |
| 313 | P62495           | 13                   | 34             | 42.3                  | 437    | 49031  | 5.7  | Eukaryotic peptide chain release factor subunit 1                                                                                                                                                  |
| 314 | UPI0000D62378    | 13                   | 60             | 42.3                  | 402    | 45292  | 8.2  | 26S protease regulatory subunit 8 (Proteasome 26S subunit ATPase 5) (Proteasome subunit p45) (p45/SUG) (Thyroid hormone receptor- interacting protein 1) (TRIP1).                                  |
| 314 | P62195           | 13                   | 60             | 41.9                  | 406    | 45626  | 7.5  | 26S protease regulatory subunit 8                                                                                                                                                                  |
| 315 | O60701           | 13                   | 39             | 40.9                  | 494    | 55024  | 7.1  | UDP-glucose 6-dehydrogenase                                                                                                                                                                        |
| 316 | P07910-2         | 13                   | 98             | 39.6                  | 293    | 32338  | 5.1  | Isoform C1 of P07910                                                                                                                                                                               |
| 317 | P35241           | 13                   | 87             | 39.6                  | 583    | 68564  | 6.4  | Radixin                                                                                                                                                                                            |
| 318 | P23381           | 13                   | 38             | 39.3                  | 471    | 53165  | 6.2  | Tryptophanyl-tRNA synthetase, cytoplasmic                                                                                                                                                          |
| 319 | P21281           | 13                   | 38             | 38                    | 511    | 56501  | 5.8  | Vacuolar ATP synthase subunit B, brain isoform                                                                                                                                                     |
| 320 | P06744           | 13                   | 76             | 36.6                  | 558    | 63147  | 8.3  | Glucose-6-phosphate isomerase                                                                                                                                                                      |

| No. | Accession Number | Unique Peptide Count | Spectrum Count | Sequence Coverage (%) | Length | MolWt  | pI   | Descriptive Name                                                                                                                                                                                                              |
|-----|------------------|----------------------|----------------|-----------------------|--------|--------|------|-------------------------------------------------------------------------------------------------------------------------------------------------------------------------------------------------------------------------------|
| 321 | P22234           | 13                   | 56             | 35.8                  | 425    | 47079  | 7.2  | Multifunctional protein ADE2<br>[Includes:<br>Phosphoribosylaminoimidazole-succinocarboxamide synthase (EC 6.3.2.6) (SAICAR synthetase);<br>Phosphoribosylaminoimidazole carboxylase (EC 4.1.1.21) (AIR carboxylase) (AIRC)]  |
| 321 | UPI000013D4E4    | 13                   | 56             | 33.7                  | 451    | 49679  | 7.5  | Multifunctional protein ADE2<br>[Includes:<br>Phosphoribosylaminoimidazole-succinocarboxamide synthase (EC 6.3.2.6) (SAICAR synthetase);<br>Phosphoribosylaminoimidazole carboxylase (EC 4.1.1.21) (AIR carboxylase) (AIRC)]. |
| 322 | P38159           | 13                   | 82             | 35.5                  | 391    | 42332  | 10.1 | Heterogeneous nuclear ribonucleoprotein G                                                                                                                                                                                     |
| 323 | P21589           | 13                   | 93             | 34.7                  | 574    | 63368  | 7    | 5'-nucleotidase precursor                                                                                                                                                                                                     |
| 323 | Q6NZX3           | 13                   | 93             | 34.7                  | 574    | 63308  | 7    | 5'-nucleotidase, ecto                                                                                                                                                                                                         |
| 323 | Q53Z63           | 13                   | 93             | 34.7                  | 574    | 63338  | 7    | 5'-nucleotidase                                                                                                                                                                                                               |
| 324 | Q96I99           | 13                   | 36             | 34.3                  | 432    | 46511  | 6.4  | Succinyl-CoA ligase [GDP-forming] beta-chain, mitochondrial precursor                                                                                                                                                         |
| 325 | P54577           | 13                   | 43             | 31.8                  | 528    | 59144  | 7    | Tyrosyl-tRNA synthetase, cytoplasmic                                                                                                                                                                                          |
| 326 | P35052           | 13                   | 60             | 31.4                  | 558    | 61650  | 7.3  | Glypican-1 precursor                                                                                                                                                                                                          |
| 326 | Q53QM4           | 13                   | 60             | 31.4                  | 558    | 61680  | 7.3  | Hypothetical protein GPC1                                                                                                                                                                                                     |
| 327 | Q9UHB9           | 13                   | 27             | 26.3                  | 627    | 70730  | 8.6  | Signal recognition particle 68 kDa protein                                                                                                                                                                                    |
| 328 | UPI0000D6239D    | 13                   | 93             | 26.5                  | 562    | 62865  | 8.4  | Septin-9 (MLL septin-like fusion protein) (MLL septin-like fusion protein MSF-A) (Ovarian/Breast septin) (Ov/Br septin) (Septin D1).                                                                                          |
| 328 | Q9UHD8-2         | 13                   | 93             | 26.2                  | 568    | 63666  | 8.4  | Isoform 2 of Q9UHD8                                                                                                                                                                                                           |
| 328 | Q9UHD8-5         | 13                   | 93             | 25.7                  | 579    | 64682  | 7.6  | Isoform 5 of Q9UHD8                                                                                                                                                                                                           |
| 328 | Q9UHD8           | 13                   | 93             | 25.4                  | 586    | 65402  | 9    | Septin-9                                                                                                                                                                                                                      |
| 329 | Q53FJ5           | 13                   | 209            | 24                    | 524    | 58141  | 5.2  | Prosaposin (Variant Gaucher disease and variant metachromatic leukodystrophy) variant                                                                                                                                         |
| 330 | P47897           | 13                   | 24             | 20.9                  | 775    | 87799  | 7.2  | GlutaminyI-tRNA synthetase                                                                                                                                                                                                    |
| 330 | Q53HS0           | 13                   | 24             | 20.9                  | 775    | 87711  | 7.2  | GlutaminyI-tRNA synthetase variant                                                                                                                                                                                            |
| 331 | P11387           | 13                   | 35             | 20                    | 765    | 90726  | 9.3  | DNA topoisomerase 1                                                                                                                                                                                                           |
| 332 | Q86W92-4         | 13                   | 29             | 19                    | 980    | 110297 | 5.4  | Isoform 4 of Q86W92                                                                                                                                                                                                           |
| 332 | Q86W92-2         | 13                   | 29             | 18.5                  | 1005   | 113181 | 5.7  | Isoform 2 of Q86W92                                                                                                                                                                                                           |
| 332 | Q86W92           | 13                   | 29             | 18.4                  | 1011   | 114024 | 5.6  | Liprin-beta-1                                                                                                                                                                                                                 |
| 333 | Q96FS1           | 13                   | 33             | 21.3                  | 830    | 92388  | 7.2  | CTNND1 protein                                                                                                                                                                                                                |
| 333 | O60716-21        | 13                   | 33             | 21.3                  | 832    | 92675  | 7.2  | Isoform 3A of O60716                                                                                                                                                                                                          |
| 333 | O60716-19        | 13                   | 33             | 21.1                  | 838    | 93496  | 7    | Isoform 3AC of O60716                                                                                                                                                                                                         |
| 333 | O60716-18        | 13                   | 33             | 20.6                  | 861    | 95868  | 6.3  | Isoform 3AB of O60716                                                                                                                                                                                                         |
| 333 | O60716-13        | 13                   | 33             | 20.1                  | 879    | 98049  | 7.5  | Isoform 2A of O60716                                                                                                                                                                                                          |
| 333 | O60716-11        | 13                   | 33             | 20                    | 885    | 98870  | 7.3  | Isoform 2AC of O60716                                                                                                                                                                                                         |
| 333 | O60716-10        | 13                   | 33             | 19.5                  | 908    | 101242 | 6.6  | Isoform 2AB of O60716                                                                                                                                                                                                         |
| 333 | Q6DHZ7           | 13                   | 33             | 19                    | 933    | 104098 | 7    | CTNND1 protein                                                                                                                                                                                                                |
| 333 | O60716-5         | 13                   | 33             | 19                    | 933    | 104156 | 7    | Isoform 1A of O60716                                                                                                                                                                                                          |
| 333 | UPI0000D62606    | 13                   | 33             | 18.8                  | 939    | 105005 | 7    | Catenin delta-1 (p120 catenin) (p120(ctn)) (Cadherin-associated Src substrate) (CAS) (p120(cas)).                                                                                                                             |

| No. | Accession Number | Unique Peptide Count | Spectrum Count | Sequence Coverage (%) | Length | MolWt  | pI   | Descriptive Name                                                                                               |
|-----|------------------|----------------------|----------------|-----------------------|--------|--------|------|----------------------------------------------------------------------------------------------------------------|
| 333 | O60716-3         | 13                   | 33             | 18.8                  | 939    | 104977 | 6.9  | Isoform 1AC of O60716                                                                                          |
| 333 | O60716-2         | 13                   | 33             | 18.4                  | 962    | 107349 | 6.3  | Isoform 1AB of O60716                                                                                          |
| 333 | O60716           | 13                   | 33             | 18.3                  | 968    | 108170 | 6.2  | Catenin delta-1 (p120 catenin) (p120(ctn)) (Cadherin-associated Src substrate) (CAS) (p120(cas))               |
| 334 | P05106           | 13                   | 38             | 18                    | 788    | 87058  | 5.2  | Integrin beta-3 precursor                                                                                      |
| 335 | UPI0000F58EF5    | 13                   | 63             | 22                    | 705    | 78878  | 5.8  | Programmed cell death 6-interacting protein                                                                    |
| 335 | Q4W4Y1           | 13                   | 63             | 17.9                  | 868    | 96079  | 6.5  | Dopamine receptor interacting protein 4                                                                        |
| 335 | Q8WUM4           | 13                   | 63             | 17.9                  | 868    | 96023  | 6.5  | Programmed cell death 6-interacting protein                                                                    |
| 335 | Q6NUS1           | 13                   | 63             | 17.8                  | 873    | 96818  | 6.5  | PDCD6IP protein                                                                                                |
| 336 | Q92974           | 13                   | 42             | 19.4                  | 893    | 101174 | 8.4  | Rho/Rac guanine nucleotide exchange factor 2                                                                   |
| 336 | Q9H023           | 13                   | 42             | 18.1                  | 958    | 108242 | 6.9  | Hypothetical protein DKFzP547L106 (Rho/rac guanine nucleotide exchange factor (GEF) 2)                         |
| 336 | Q8TDA3           | 13                   | 42             | 17.6                  | 985    | 111471 | 7.3  | Guanine nucleotide exchange factor GEF-H1 (Rho/rac guanine nucleotide exchange factor (GEF) 2)                 |
| 336 | Q5VY92           | 13                   | 42             | 17.5                  | 986    | 111543 | 7.3  | Rho/rac guanine nucleotide exchange factor (GEF) 2                                                             |
| 336 | Q5VY93           | 13                   | 42             | 17.5                  | 987    | 111493 | 7    | Rho/rac guanine nucleotide exchange factor (GEF) 2                                                             |
| 337 | Q9Y2L1           | 13                   | 31             | 17.1                  | 958    | 109003 | 7.1  | Exosome complex exonuclease RRP44                                                                              |
| 337 | UPI0000D61A7F    | 13                   | 31             | 17.1                  | 960    | 109187 | 7.1  | Exosome complex exonuclease RRP44 (EC 3.1.13.-) (Ribosomal RNA- processing protein 44) (DIS3 protein homolog). |
| 337 | UPI00001610C4    | 13                   | 31             | 17.1                  | 958    | 108976 | 7.1  | KIAA1008                                                                                                       |
| 338 | UPI0000136781    | 13                   | 72             | 15.4                  | 955    | 108694 | 10.2 | thyroid hormone receptor associated protein 3                                                                  |
| 339 | Q9Y2A7           | 13                   | 27             | 12.8                  | 1128   | 128790 | 6.6  | Nck-associated protein 1                                                                                       |
| 339 | UPI00001693F2    | 13                   | 27             | 12.7                  | 1134   | 129517 | 6.7  | NCK-associated protein 1 isoform 2                                                                             |
| 340 | Q68CZ2           | 13                   | 47             | 12.5                  | 1445   | 155237 | 6.8  | Tensin-3                                                                                                       |
| 340 | UPI0000457557    | 13                   | 47             | 12.5                  | 1445   | 155293 | 6.8  | tensin-like SH2 domain containing 1                                                                            |
| 340 | UPI00001AE9DA    | 13                   | 47             | 12.5                  | 1445   | 155265 | 6.8  | tensin 3                                                                                                       |
| 340 | Q8IZW7           | 13                   | 47             | 12.5                  | 1445   | 155277 | 6.8  | Tensin 3                                                                                                       |
| 341 | Q5VYK3           | 13                   | 42             | 8.7                   | 1845   | 204289 | 7.1  | Proteasome-associated protein ECM29 homolog                                                                    |
| 341 | UPI0000D618EB    | 13                   | 42             | 8.7                   | 1833   | 203186 | 7.2  | Proteasome-associated protein ECM29 homolog (Ecm29).                                                           |
| 341 | UPI00001D76EA    | 13                   | 42             | 8.7                   | 1839   | 203992 | 7.2  | Proteasome-associated protein ECM29 homolog (Ecm29).                                                           |
| 341 | UPI0000DD7F7A    | 13                   | 42             | 7.9                   | 2017   | 223692 | 8.7  | PREDICTED: similar to Proteasome-associated protein ECM29 homolog (Ecm29)                                      |
| 342 | Q9Y520           | 13                   | 54             | 5.3                   | 2701   | 295829 | 9    | Hypothetical protein                                                                                           |
| 342 | UPI0000203BC5    | 13                   | 54             | 5.3                   | 2703   | 295999 | 9    | HBxAg transactivated protein 2                                                                                 |
| 342 | UPI0000E265EC    | 13                   | 54             | 5                     | 2817   | 308606 | 9.1  | HBxAg transactivated protein 2                                                                                 |
| 343 | P61604           | 12                   | 305            | 76.5                  | 102    | 10932  | 8.9  | 10 kDa heat shock protein, mitochondrial                                                                       |



| No. | Accession Number | Unique Peptide Count | Spectrum Count | Sequence Coverage (%) | Length | MolWt | pI   | Descriptive Name                                                                                                              |
|-----|------------------|----------------------|----------------|-----------------------|--------|-------|------|-------------------------------------------------------------------------------------------------------------------------------|
| 344 | Q9Y696           | 12                   | 41             | 61.7                  | 253    | 28772 | 5.6  | Chloride intracellular channel protein 4                                                                                      |
| 345 | P61019           | 12                   | 126            | 60.8                  | 212    | 23546 | 6.5  | Ras-related protein Rab-2A                                                                                                    |
| 346 | Q13162           | 12                   | 52             | 60.1                  | 271    | 30540 | 6.3  | Peroxiredoxin-4                                                                                                               |
| 347 | P18669           | 12                   | 86             | 59.4                  | 254    | 28804 | 7.2  | Phosphoglycerate mutase 1                                                                                                     |
| 347 | UPI00001AF8FE    | 12                   | 86             | 59.4                  | 254    | 28850 | 7.2  | PREDICTED: similar to Phosphoglycerate mutase 1 (Phosphoglycerate mutase isozyme B) (PGAM-B) (BPG-dependent PGAM 1) isoform 1 |
| 347 | Q6P6D7           | 12                   | 86             | 59.4                  | 254    | 28820 | 7.2  | Phosphoglycerate mutase 1                                                                                                     |
| 347 | Q53G35           | 12                   | 86             | 59.4                  | 254    | 28832 | 7.2  | Phosphoglycerate mutase 1 (Brain) variant                                                                                     |
| 348 | P16152           | 12                   | 50             | 55.6                  | 277    | 30375 | 8.3  | Carbonyl reductase [NADPH] 1 (EC 1.1.1.184) (NADPH-dependent carbonyl reductase 1) (Prostaglandin-E(2) 9-reductase)           |
| 349 | P12004           | 12                   | 61             | 52.9                  | 261    | 28769 | 4.7  | Proliferating cell nuclear antigen                                                                                            |
| 349 | Q6FHF5           | 12                   | 61             | 52.9                  | 261    | 28706 | 4.7  | Proliferating cell nuclear antigen                                                                                            |
| 350 | P38117           | 12                   | 77             | 51.8                  | 255    | 27844 | 8.1  | Electron transfer flavoprotein subunit beta                                                                                   |
| 351 | P55145           | 12                   | 67             | 51.4                  | 179    | 20257 | 8.4  | ARMET protein precursor                                                                                                       |
| 351 | UPI00004542F2    | 12                   | 67             | 49.7                  | 185    | 21144 | 8.9  | arginine-rich, mutated in early stage tumors                                                                                  |
| 352 | Q07955           | 12                   | 84             | 48                    | 248    | 27745 | 10.4 | Splicing factor, arginine/serine-rich 1                                                                                       |
| 353 | P13804           | 12                   | 58             | 46.2                  | 333    | 35080 | 8.4  | Electron transfer flavoprotein subunit alpha, mitochondrial precursor                                                         |
| 354 | Q92820           | 12                   | 56             | 44.3                  | 318    | 35964 | 7.1  | Gamma-glutamyl hydrolase precursor                                                                                            |
| 355 | Q13347           | 12                   | 32             | 42.8                  | 325    | 36502 | 5.6  | Eukaryotic translation initiation factor 3 subunit 2                                                                          |
| 355 | Q53HU7           | 12                   | 32             | 42.8                  | 325    | 36500 | 5.6  | Eukaryotic translation initiation factor 3, subunit 2 beta, 36kDa variant                                                     |
| 356 | P46781           | 12                   | 102            | 41.2                  | 194    | 22591 | 10.7 | 40S ribosomal protein S9                                                                                                      |
| 357 | P22695           | 12                   | 35             | 40.8                  | 453    | 48443 | 8.6  | Ubiquinol-cytochrome-c reductase complex core protein 2, mitochondrial precursor                                              |
| 358 | Q5VU20           | 12                   | 112            | 39.7                  | 393    | 43135 | 8.4  | PAI-1 mRNA-binding protein                                                                                                    |
| 358 | Q8NC51           | 12                   | 112            | 38.2                  | 408    | 44965 | 8.6  | Plasminogen activator inhibitor 1 RNA-binding protein                                                                         |
| 359 | Q9Y266           | 12                   | 42             | 39.6                  | 331    | 38243 | 5.4  | Nuclear migration protein nudC                                                                                                |
| 360 | Q9HDC9           | 12                   | 46             | 37.7                  | 416    | 46480 | 6.2  | Adipocyte plasma membrane-associated protein                                                                                  |
| 360 | UPI0000456F75    | 12                   | 46             | 37.7                  | 416    | 46528 | 6.2  | Adipocyte plasma membrane-associated protein (BSCv protein).                                                                  |
| 361 | P13489           | 12                   | 43             | 35.6                  | 461    | 49974 | 4.8  | Ribonuclease inhibitor                                                                                                        |
| 361 | Q9BQ80           | 12                   | 43             | 35.6                  | 461    | 49954 | 4.8  | Ribonuclease/angiogenin inhibitor 1                                                                                           |
| 362 | P31943           | 12                   | 162            | 34.3                  | 449    | 49229 | 6.3  | Heterogeneous nuclear ribonucleoprotein H                                                                                     |
| 362 | Q6IBM4           | 12                   | 162            | 34.3                  | 449    | 49130 | 6.2  | HNRPH1 protein                                                                                                                |
| 362 | UPI00001AF4DD    | 12                   | 162            | 32.6                  | 472    | 51230 | 6.8  | Heterogeneous nuclear ribonucleoprotein H (hnRNP H).                                                                          |
| 363 | P35998           | 12                   | 60             | 33.5                  | 433    | 48634 | 5.9  | 26S protease regulatory subunit 7                                                                                             |

| No. | Accession Number | Unique Peptide Count | Spectrum Count | Sequence Coverage (%) | Length | MolWt  | pI  | Descriptive Name                                                                                                                    |
|-----|------------------|----------------------|----------------|-----------------------|--------|--------|-----|-------------------------------------------------------------------------------------------------------------------------------------|
| 363 | Q3LIA5           | 12                   | 60             | 33.5                  | 433    | 48618  | 6.1 | Hypothetical protein Nbla10058                                                                                                      |
| 364 | P31930           | 12                   | 33             | 32.7                  | 480    | 52646  | 6.4 | Ubiquinol-cytochrome-c reductase complex core protein 1, mitochondrial precursor                                                    |
| 365 | P49411           | 12                   | 34             | 32.1                  | 452    | 49542  | 7.6 | Elongation factor Tu, mitochondrial precursor                                                                                       |
| 366 | A4D2I9           | 12                   | 30             | 32                    | 431    | 48294  | 5   | Src homology 3 domain-containing protein HIP-55                                                                                     |
| 367 | P09622           | 12                   | 74             | 32                    | 509    | 54150  | 7.7 | Dihydropolyl dehydrogenase, mitochondrial precursor                                                                                 |
| 367 | Q8WTS4           | 12                   | 74             | 32                    | 509    | 54177  | 7.9 | Dihydropolipoamide dehydrogenase                                                                                                    |
| 367 | Q59EV8           | 12                   | 74             | 31.3                  | 520    | 55594  | 8.5 | Dihydropolipoamide dehydrogenase, variant                                                                                           |
| 368 | P00505           | 12                   | 41             | 30.5                  | 430    | 47476  | 9   | Aspartate aminotransferase, mitochondrial precursor                                                                                 |
| 368 | UPI000013CB99    | 12                   | 41             | 30.5                  | 430    | 47518  | 9   | aspartate aminotransferase 2 precursor                                                                                              |
| 368 | Q53FL3           | 12                   | 41             | 30.5                  | 430    | 47548  | 9   | Aspartate aminotransferase 2 variant                                                                                                |
| 369 | Q9H4M9           | 12                   | 24             | 30.3                  | 534    | 60627  | 6.8 | EH domain-containing protein 1                                                                                                      |
| 370 | P48735           | 12                   | 36             | 29.2                  | 452    | 50909  | 8.7 | Isocitrate dehydrogenase [NADP], mitochondrial precursor (EC 1.1.1.42) (Oxalosuccinate decarboxylase) (IDH) (NADP(+)-specific ICDH) |
| 370 | Q53GL5           | 12                   | 36             | 29.2                  | 452    | 50910  | 8.5 | Isocitrate dehydrogenase 2 (NADP+), mitochondrial variant                                                                           |
| 371 | Q9Y2X3           | 12                   | 50             | 28.9                  | 529    | 59578  | 8.9 | Nucleolar protein NOP5                                                                                                              |
| 372 | Q53H17           | 12                   | 43             | 28.1                  | 606    | 66228  | 6.7 | WD repeat-containing protein 1 isoform 1 variant                                                                                    |
| 372 | Q59ER5           | 12                   | 43             | 27.2                  | 624    | 68171  | 7.2 | WD repeat-containing protein 1 isoform 1 variant                                                                                    |
| 373 | P55809           | 12                   | 35             | 27.9                  | 520    | 56158  | 7.5 | Succinyl-CoA:3-ketoacid-coenzyme A transferase 1, mitochondrial precursor                                                           |
| 374 | P07384           | 12                   | 26             | 22.1                  | 714    | 81890  | 5.7 | Calpain-1 catalytic subunit                                                                                                         |
| 374 | Q6DHV4           | 12                   | 26             | 22.1                  | 714    | 81831  | 5.6 | CAPN1 protein                                                                                                                       |
| 375 | Q02809           | 12                   | 49             | 21.7                  | 727    | 83550  | 6.9 | Procollagen-lysine,2-oxoglutarate 5 dioxygenase 1 precursor                                                                         |
| 376 | Q15436           | 12                   | 51             | 20.1                  | 765    | 86161  | 7.1 | Protein transport protein Sec23A                                                                                                    |
| 377 | UPI0000161B5A    | 12                   | 43             | 20.5                  | 835    | 93394  | 5.1 | Ubiquitin isopeptidase T                                                                                                            |
| 377 | P45974-2         | 12                   | 43             | 20.5                  | 835    | 93308  | 5.1 | Isoform Short of P45974                                                                                                             |
| 377 | P45974           | 12                   | 43             | 19.9                  | 858    | 95786  | 5   | Ubiquitin carboxyl-terminal hydrolase 5                                                                                             |
| 378 | Q9UGP8           | 12                   | 42             | 18.2                  | 760    | 87997  | 5.3 | Translocation protein SEC63 homolog                                                                                                 |
| 379 | P42285           | 12                   | 35             | 15.2                  | 1042   | 117805 | 6.5 | Superkiller viralicidic activity 2-like 2                                                                                           |
| 379 | Q6MZZ8           | 12                   | 35             | 15.2                  | 1042   | 117761 | 6.7 | Hypothetical protein DKFZp686K2075                                                                                                  |
| 380 | Q9H0D6-2         | 12                   | 29             | 15.6                  | 874    | 99962  | 8   | Isoform 2 of Q9H0D6                                                                                                                 |
| 380 | Q9H0D6           | 12                   | 29             | 14.3                  | 950    | 108583 | 7.5 | 5'-3' exoribonuclease 2                                                                                                             |
| 381 | Q6PKG0-3         | 12                   | 44             | 15.3                  | 1019   | 116465 | 9.1 | Isoform 3 of Q6PKG0                                                                                                                 |
| 381 | Q6PKG0           | 12                   | 44             | 14.2                  | 1096   | 123510 | 8.8 | La-related protein 1                                                                                                                |
| 381 | UPI0000457378    | 12                   | 44             | 14.2                  | 1095   | 122812 | 9.1 | La-related protein 1 (La ribonucleoprotein domain family member 1).                                                                 |
| 381 | Q6PKG0-2         | 12                   | 44             | 14.2                  | 1096   | 122940 | 9.1 | Isoform 2 of Q6PKG0                                                                                                                 |

| No. | Accession Number | Unique Peptide Count | Spectrum Count | Sequence Coverage (%) | Length | MolWt  | pI  | Descriptive Name                                                                  |
|-----|------------------|----------------------|----------------|-----------------------|--------|--------|-----|-----------------------------------------------------------------------------------|
| 382 | P20020-6         | 12                   | 42             | 14.9                  | 1184   | 130617 | 6   | Isoform K of P20020                                                               |
| 382 | P20020-3         | 12                   | 42             | 14.5                  | 1220   | 134685 | 5.9 | Isoform B of P20020                                                               |
| 382 | P20020-4         | 12                   | 42             | 14.2                  | 1249   | 137804 | 6   | Isoform C of P20020                                                               |
| 382 | P20020           | 12                   | 42             | 14.1                  | 1258   | 138755 | 6   | Plasma membrane calcium-transporting ATPase 1                                     |
| 383 | Q9BPX3           | 12                   | 30             | 13.8                  | 1015   | 114334 | 5.6 | Condensin complex subunit 3                                                       |
| 384 | O43795-2         | 12                   | 27             | 14.2                  | 1078   | 124951 | 9.2 | Isoform 2 of O43795                                                               |
| 384 | O43795           | 12                   | 27             | 13.5                  | 1136   | 131985 | 9.4 | Myosin-Ib                                                                         |
| 385 | A3KQ42           | 12                   | 17             | 12.6                  | 1126   | 118693 | 5.6 | HLA-B associated transcript 3                                                     |
| 385 | Q5HYL9           | 12                   | 17             | 12.6                  | 1126   | 118725 | 5.6 | Hypothetical protein DKFZp686L0653                                                |
| 385 | UPI0000161DCF    | 12                   | 17             | 12.5                  | 1132   | 119419 | 5.6 | HLA-B associated transcript-3 isoform a                                           |
| 385 | UPI000013C678    | 12                   | 17             | 12.5                  | 1140   | 120258 | 5.6 | HLA-B associated transcript 3                                                     |
| 385 | P46379           | 12                   | 17             | 12.5                  | 1132   | 119409 | 5.6 | Large proline-rich protein BAT3                                                   |
| 385 | Q5SQ39           | 12                   | 17             | 12.2                  | 1162   | 122342 | 5.7 | HLA-B associated transcript 3                                                     |
| 386 | Q9NQW6-2         | 12                   | 31             | 11.7                  | 1087   | 120016 | 8.2 | Isoform 2 of Q9NQW6                                                               |
| 386 | Q9NQW6           | 12                   | 31             | 11.3                  | 1124   | 124199 | 8.1 | Actin-binding protein anillin                                                     |
| 387 | Q14573           | 12                   | 32             | 5.5                   | 2671   | 304037 | 6.5 | Inositol 1,4,5-trisphosphate receptor type 3                                      |
| 387 | UPI0000161B31    | 12                   | 32             | 5.5                   | 2671   | 304115 | 6.5 | inositol 1,4,5-triphosphate receptor, type 3                                      |
| 387 | Q5TAQ2           | 12                   | 32             | 5.5                   | 2671   | 304105 | 6.5 | Inositol 1,4,5-triphosphate receptor, type 3                                      |
| 388 | Q99497           | 11                   | 66             | 76.2                  | 189    | 19891  | 6.8 | Protein DJ-1                                                                      |
| 389 | P62937           | 11                   | 325            | 70.3                  | 165    | 18012  | 7.8 | Peptidyl-prolyl cis-trans isomerase A                                             |
| 390 | P32969           | 11                   | 123            | 66.1                  | 192    | 21863  | 10  | 60S ribosomal protein L9                                                          |
| 391 | P04792           | 11                   | 174            | 64.4                  | 205    | 22783  | 6.4 | Heat-shock protein beta-1                                                         |
| 392 | Q13509           | 11                   | 86             | 64.2                  | 450    | 50433  | 4.9 | Tubulin beta-3 chain                                                              |
| 393 | UPI00004A67B3    | 11                   | 99             | 68.2                  | 148    | 16621  | 8.3 | destrin isoform b                                                                 |
| 393 | P60981           | 11                   | 99             | 61.2                  | 165    | 18506  | 7.9 | Destrin                                                                           |
| 394 | O00299           | 11                   | 82             | 61                    | 241    | 26923  | 5.2 | Chloride intracellular channel protein 1                                          |
| 394 | Q53FB0           | 11                   | 82             | 61                    | 241    | 27015  | 5.2 | Chloride intracellular channel 1 variant                                          |
| 395 | P28066           | 11                   | 81             | 60.6                  | 241    | 26411  | 4.8 | Proteasome subunit alpha type 5                                                   |
| 396 | P27348           | 11                   | 164            | 60                    | 245    | 27764  | 4.8 | 14-3-3 protein theta                                                              |
| 397 | P61026           | 11                   | 94             | 57.5                  | 200    | 22541  | 8.4 | Ras-related protein Rab-10                                                        |
| 397 | UPI0000072ACD    | 11                   | 94             | 57.5                  | 200    | 22469  | 8.6 | ras-related GTP-binding protein RAB10                                             |
| 398 | P08865           | 11                   | 87             | 56.9                  | 295    | 32854  | 4.9 | 40S ribosomal protein SA                                                          |
| 399 | P21266           | 11                   | 51             | 56.9                  | 225    | 26560  | 5.5 | Glutathione S-transferase Mu 3                                                    |
| 400 | Q5U0I1           | 11                   | 76             | 56.4                  | 218    | 24489  | 5.7 | RAB11B, member RAS oncogene family                                                |
| 401 | Q13126           | 11                   | 52             | 55.8                  | 283    | 31236  | 7.2 | S-methyl-5-thioadenosine phosphorylase                                            |
| 401 | Q6FHT1           | 11                   | 52             | 55.8                  | 283    | 31254  | 7.2 | MTAP protein                                                                      |
| 401 | Q6FHP1           | 11                   | 52             | 55.8                  | 283    | 31210  | 7.2 | MTAP protein                                                                      |
| 402 | Q2TNB3           | 11                   | 77             | 54.8                  | 239    | 27349  | 5.6 | Cell migration-inducing protein 22                                                |
| 402 | Q9UL46           | 11                   | 77             | 54.8                  | 239    | 27362  | 5.6 | Proteasome activator complex subunit 2                                            |
| 402 | Q86SZ7           | 11                   | 77             | 54.8                  | 239    | 27402  | 5.7 | Full-length cDNA clone CS0DJ015YJ12 of T cells (Jurkat cell line) of Homo sapiens |
| 403 | Q7Z4Y4           | 11                   | 37             | 54.2                  | 227    | 25620  | 9.3 | GTP:AMP phosphotransferase                                                        |
| 403 | Q9UIJ7           | 11                   | 37             | 54.2                  | 227    | 25565  | 9.2 | GTP:AMP phosphotransferase mitochondrial                                          |
| 404 | P30085           | 11                   | 53             | 52.6                  | 196    | 22222  | 5.6 | UMP-CMP kinase                                                                    |
| 405 | P67809           | 11                   | 55             | 50.9                  | 324    | 35924  | 9.9 | Nuclease sensitive element-binding protein 1                                      |

| No. | Accession Number | Unique Peptide Count | Spectrum Count | Sequence Coverage (%) | Length | MolWt | pI  | Descriptive Name                                                                                                                   |
|-----|------------------|----------------------|----------------|-----------------------|--------|-------|-----|------------------------------------------------------------------------------------------------------------------------------------|
| 406 | Q9Y5M8           | 11                   | 55             | 50.6                  | 271    | 29702 | 9   | Signal recognition particle receptor subunit beta                                                                                  |
| 407 | Q53GQ0           | 11                   | 63             | 50                    | 312    | 34350 | 9.3 | Estradiol 17-beta-dehydrogenase 12                                                                                                 |
| 407 | UPI000004C79B    | 11                   | 63             | 50                    | 312    | 34324 | 9.3 | steroid dehydrogenase homolog                                                                                                      |
| 408 | P67936           | 11                   | 96             | 49.2                  | 248    | 28522 | 4.7 | Tropomyosin alpha-4 chain                                                                                                          |
| 409 | P24539           | 11                   | 66             | 48.8                  | 256    | 28909 | 9.4 | ATP synthase B chain, mitochondrial precursor                                                                                      |
| 410 | P25786           | 11                   | 36             | 48.7                  | 263    | 29556 | 6.6 | Proteasome subunit alpha type 1                                                                                                    |
| 410 | P25786-2         | 11                   | 36             | 47.6                  | 269    | 30239 | 7   | Isoform Long of P25786                                                                                                             |
| 411 | P29692           | 11                   | 119            | 48.4                  | 281    | 31122 | 5   | Elongation factor 1-delta                                                                                                          |
| 411 | Q96I38           | 11                   | 119            | 21                    | 647    | 71422 | 6.4 | EEF1D protein                                                                                                                      |
| 412 | O60664           | 11                   | 49             | 47.7                  | 434    | 47047 | 5.4 | Mannose-6-phosphate receptor-binding protein 1                                                                                     |
| 413 | A2VBX9           | 11                   | 52             | 47.6                  | 273    | 31655 | 6   | MHC class I antigen                                                                                                                |
| 414 | P46782           | 11                   | 108            | 47.5                  | 204    | 22876 | 9.7 | 40S ribosomal protein S5                                                                                                           |
| 415 | P27695           | 11                   | 29             | 46.5                  | 318    | 35554 | 8.1 | DNA-(apurinic or apyrimidinic site) lyase                                                                                          |
| 416 | Q15019           | 11                   | 63             | 44.6                  | 361    | 41487 | 6.6 | Septin-2                                                                                                                           |
| 417 | P40925           | 11                   | 87             | 40.7                  | 334    | 36426 | 7.3 | Malate dehydrogenase, cytoplasmic                                                                                                  |
| 418 | P09525           | 11                   | 71             | 40.4                  | 319    | 35883 | 6.1 | Annexin A4                                                                                                                         |
| 419 | Q53GN6           | 11                   | 49             | 37.2                  | 376    | 42917 | 5.7 | Proteasome 26S non-ATPase subunit 13 isoform 1 variant                                                                             |
| 419 | UPI0000158430    | 11                   | 49             | 37.2                  | 376    | 42946 | 5.8 | 26S proteasome non-ATPase regulatory subunit 13 (26S proteasome regulatory subunit S11) (26S proteasome regulatory subunit p40.5). |
| 419 | Q9UNM6           | 11                   | 49             | 37.2                  | 376    | 42918 | 5.8 | 26S proteasome non-ATPase regulatory subunit 13                                                                                    |
| 419 | Q9Y6E3           | 11                   | 49             | 37.1                  | 377    | 42671 | 6.1 | HSPC027                                                                                                                            |
| 420 | P07339           | 11                   | 139            | 37.1                  | 412    | 44552 | 6.5 | Cathepsin D precursor (EC 3.4.23.5) [Contains: Cathepsin D light chain; Cathepsin D heavy chain]                                   |
| 421 | Q02978           | 11                   | 47             | 36.9                  | 314    | 34062 | 9.9 | Mitochondrial 2-oxoglutarate/malate carrier protein                                                                                |
| 422 | P61160           | 11                   | 82             | 35.3                  | 394    | 44761 | 6.7 | Actin-like protein 2                                                                                                               |
| 423 | Q5D0C4           | 11                   | 109            | 35.3                  | 397    | 44000 | 9.4 | SERPINE2 protein                                                                                                                   |
| 424 | P07954-2         | 11                   | 32             | 38.1                  | 467    | 50213 | 7.4 | Isoform Cytoplasmic of P07954                                                                                                      |
| 424 | P07954           | 11                   | 32             | 34.9                  | 510    | 54637 | 8.8 | Fumarate hydratase, mitochondrial precursor                                                                                        |
| 425 | Q6IBS1           | 11                   | 32             | 34.4                  | 404    | 45250 | 5.5 | PSMC3 protein                                                                                                                      |
| 426 | Q96ND2           | 11                   | 56             | 34                    | 377    | 43084 | 4.9 | CDNA FLJ31051 fis, clone HSYRA2000605, weakly similar to MYOSIN HEAVY CHAIN, CLONE 203                                             |
| 427 | P51572           | 11                   | 300            | 33.7                  | 246    | 27992 | 8.4 | B-cell receptor-associated protein 31                                                                                              |
| 427 | Q53HT6           | 11                   | 300            | 33.7                  | 246    | 27962 | 8.4 | B-cell receptor-associated protein 31 variant                                                                                      |
| 427 | Q53G72           | 11                   | 300            | 33.7                  | 246    | 27931 | 8.4 | B-cell receptor-associated protein 31 variant                                                                                      |
| 428 | Q9BS26           | 11                   | 29             | 33.7                  | 406    | 46971 | 5.3 | Thioredoxin domain-containing protein 4 precursor                                                                                  |
| 429 | P15311           | 11                   | 63             | 33.3                  | 586    | 69413 | 6.3 | Ezrin                                                                                                                              |
| 429 | Q6NUR7           | 11                   | 63             | 33.3                  | 586    | 69242 | 6.3 | Villin 2                                                                                                                           |
| 429 | UPI0000D61508    | 11                   | 63             | 33.1                  | 589    | 69688 | 6.3 | Ezrin (p81) (Cytovillin) (Villin-2).                                                                                               |

| No. | Accession Number | Unique Peptide Count | Spectrum Count | Sequence Coverage (%) | Length | MolWt | pI  | Descriptive Name                                                                       |
|-----|------------------|----------------------|----------------|-----------------------|--------|-------|-----|----------------------------------------------------------------------------------------|
| 430 | Q7L1Q6           | 11                   | 33             | 33.7                  | 419    | 48043 | 5.9 | Basic leucine zipper and W2 domain-containing protein 1                                |
| 430 | Q53FN7           | 11                   | 33             | 33.3                  | 424    | 48618 | 6.1 | BZW1 protein variant                                                                   |
| 431 | P62333           | 11                   | 26             | 32.6                  | 389    | 44173 | 7.5 | 26S protease regulatory subunit S10B                                                   |
| 432 | P39656           | 11                   | 103            | 32.3                  | 439    | 48810 | 5.7 | Dolichyl-diphosphooligosaccharide-protein glycosyltransferase 48 kDa subunit precursor |
| 432 | UPI0000163BD0    | 11                   | 103            | 31.1                  | 456    | 50702 | 6.4 | dolichyl-diphosphooligosaccharide-protein glycosyltransferase precursor                |
| 432 | Q5VWA5           | 11                   | 103            | 31.1                  | 456    | 50801 | 6.5 | Dolichyl-diphosphooligosaccharide-protein glycosyltransferase                          |
| 433 | P43686           | 11                   | 46             | 32.3                  | 418    | 47366 | 5.2 | 26S protease regulatory subunit 6B                                                     |
| 434 | O00231           | 11                   | 27             | 32                    | 422    | 47464 | 6.5 | 26S proteasome non-ATPase regulatory subunit 11                                        |
| 435 | Q9Y265           | 11                   | 39             | 31.1                  | 456    | 50228 | 6.4 | RuvB-like 1                                                                            |
| 436 | P28838           | 11                   | 25             | 31                    | 519    | 56166 | 7.9 | Cytosol aminopeptidase                                                                 |
| 437 | Q9NVA2           | 11                   | 44             | 30.3                  | 429    | 49398 | 6.8 | Septin-11                                                                              |
| 438 | P41091           | 11                   | 27             | 29.9                  | 472    | 51110 | 8.4 | Eukaryotic translation initiation factor 2 subunit 3                                   |
| 438 | Q53HK3           | 11                   | 27             | 29.9                  | 472    | 51083 | 8.4 | Eukaryotic translation initiation factor 2, subunit 3 gamma, 52kDa variant             |
| 439 | Q96D94           | 11                   | 29             | 29.7                  | 499    | 54025 | 5.3 | SIAHBP1 protein                                                                        |
| 439 | Q969E7           | 11                   | 29             | 28.7                  | 516    | 55729 | 5.3 | SIAHBP1 protein                                                                        |
| 439 | UPI00004576FF    | 11                   | 29             | 27.4                  | 541    | 58115 | 5.3 | fuse-binding protein-interacting repressor isoform b                                   |
| 439 | Q99628           | 11                   | 29             | 27.4                  | 541    | 57996 | 5.3 | Siah binding protein 1                                                                 |
| 439 | Q9NZA0           | 11                   | 29             | 27.3                  | 542    | 58172 | 5.3 | FBP-interacting repressor                                                              |
| 439 | Q9UJY7           | 11                   | 29             | 26.6                  | 556    | 59572 | 5.3 | Poly-U binding splicing factor PUF60                                                   |
| 439 | UPI00004576FE    | 11                   | 29             | 26.5                  | 558    | 59819 | 5.3 | fuse-binding protein-interacting repressor isoform b                                   |
| 439 | Q9UHX1           | 11                   | 29             | 26.5                  | 559    | 59876 | 5.3 | Ro ribonucleoprotein-binding protein 1                                                 |
| 440 | Q15008           | 11                   | 31             | 28.3                  | 389    | 45531 | 5.6 | 26S proteasome non-ATPase regulatory subunit 6                                         |
| 441 | P43490           | 11                   | 31             | 27.7                  | 491    | 55521 | 7.2 | Nicotinamide phosphoribosyltransferase                                                 |
| 442 | P05362           | 11                   | 62             | 25.8                  | 532    | 57825 | 8   | Intercellular adhesion molecule 1 precursor                                            |
| 443 | Q5JTV8           | 11                   | 37             | 25.2                  | 583    | 66248 | 8.2 | Torsin-1A-interacting protein 1                                                        |
| 444 | O43776           | 11                   | 29             | 25                    | 548    | 62943 | 6.3 | Asparaginyl-tRNA synthetase, cytoplasmic                                               |
| 445 | Q5T0M6           | 11                   | 24             | 25.5                  | 466    | 50316 | 6.6 | Annexin A7                                                                             |
| 445 | Q53HM8           | 11                   | 24             | 25.5                  | 466    | 50228 | 7.2 | Annexin VII isoform 1 variant                                                          |
| 445 | P20073           | 11                   | 24             | 24.4                  | 488    | 52739 | 5.7 | Annexin A7                                                                             |
| 445 | Q5T0M7           | 11                   | 24             | 24.4                  | 488    | 52739 | 5.7 | Annexin A7                                                                             |
| 446 | P48444           | 11                   | 65             | 24.1                  | 511    | 57210 | 6.2 | Coatomer subunit delta                                                                 |
| 446 | UPI000049DD56    | 11                   | 65             | 22.3                  | 552    | 61626 | 5.8 | Coatomer subunit delta (Delta-coat protein) (Delta-COP) (Archain).                     |
| 446 | Q6MZV5           | 11                   | 65             | 22.3                  | 552    | 61598 | 5.8 | Hypothetical protein DKFZp686M09245                                                    |
| 447 | Q02818           | 11                   | 41             | 24.1                  | 461    | 53879 | 5.2 | Nucleobindin-1 precursor                                                               |
| 447 | Q53GX6           | 11                   | 41             | 24.1                  | 461    | 53907 | 5.2 | Nucleobindin 1 variant                                                                 |
| 448 | P50995           | 11                   | 34             | 23.8                  | 505    | 54390 | 7.7 | Annexin A11                                                                            |
| 449 | Q68CR9           | 11                   | 32             | 29.2                  | 401    | 45771 | 5.7 | Hypothetical protein DKFZp781B11202                                                    |

| No. | Accession Number | Unique Peptide Count | Spectrum Count | Sequence Coverage (%) | Length | MolWt  | pI  | Descriptive Name                                                                                                                                                                                                                                                  |
|-----|------------------|----------------------|----------------|-----------------------|--------|--------|-----|-------------------------------------------------------------------------------------------------------------------------------------------------------------------------------------------------------------------------------------------------------------------|
| 449 | P14868           | 11                   | 32             | 23.4                  | 501    | 57136  | 6.5 | Aspartyl-tRNA synthetase, cytoplasmic                                                                                                                                                                                                                             |
| 450 | Q53G58           | 11                   | 32             | 22.8                  | 474    | 53281  | 7.1 | Coronin, actin binding protein, 1C variant                                                                                                                                                                                                                        |
| 450 | Q9ULV4           | 11                   | 32             | 22.8                  | 474    | 53249  | 7.1 | Coronin-1C                                                                                                                                                                                                                                                        |
| 451 | Q96AE4           | 11                   | 80             | 22.7                  | 644    | 67560  | 7.6 | Far upstream element-binding protein 1                                                                                                                                                                                                                            |
| 451 | UPI00004561FD    | 11                   | 80             | 22.4                  | 651    | 68491  | 7.3 | Far upstream element-binding protein 1 (FUSE-binding protein 1) (FBP) (DNA helicase V) (HDH V).                                                                                                                                                                   |
| 451 | Q96AE4-2         | 11                   | 80             | 22.4                  | 653    | 68605  | 7.3 | Isoform 2 of Q96AE4                                                                                                                                                                                                                                               |
| 451 | UPI000059CFF9    | 11                   | 80             | 22.3                  | 655    | 68904  | 7.9 | Far upstream element-binding protein 1 (FUSE-binding protein 1) (FBP) (DNA helicase V) (HDH V).                                                                                                                                                                   |
| 452 | A2A418           | 11                   | 87             | 21.5                  | 731    | 80641  | 5.8 | Gelsolin                                                                                                                                                                                                                                                          |
| 452 | P06396           | 11                   | 87             | 20.1                  | 782    | 85697  | 6.3 | Gelsolin precursor                                                                                                                                                                                                                                                |
| 453 | P46060           | 11                   | 24             | 21.3                  | 587    | 63542  | 4.7 | Ran GTPase-activating protein 1                                                                                                                                                                                                                                   |
| 454 | P07686           | 11                   | 80             | 20.7                  | 556    | 63111  | 6.8 | Beta-hexosaminidase beta chain precursor (EC 3.2.1.52) (N-acetyl-beta-glucosaminidase) (Beta-N-acetylhexosaminidase) (Hexosaminidase B) (Cervical cancer proto-oncogene 7) (HCC-7) [Contains: Beta-hexosaminidase beta-B chain; Beta-hexosaminidase beta-A chain] |
| 455 | O75746           | 11                   | 38             | 20.6                  | 678    | 74756  | 8.4 | Calcium-binding mitochondrial carrier protein Aralar1                                                                                                                                                                                                             |
| 455 | Q96AM8           | 11                   | 38             | 20.6                  | 678    | 74762  | 8.4 | Solute carrier family 25 (Mitochondrial carrier, Aralar), member 12                                                                                                                                                                                               |
| 456 | Q99798           | 11                   | 44             | 21.2                  | 780    | 85425  | 7.6 | Aconitate hydratase, mitochondrial precursor                                                                                                                                                                                                                      |
| 456 | Q8TAQ6           | 11                   | 44             | 21.2                  | 780    | 85565  | 7.7 | Aconitase 2, mitochondrial                                                                                                                                                                                                                                        |
| 456 | Q6FHX0           | 11                   | 44             | 21.2                  | 780    | 85467  | 7.5 | ACO2 protein                                                                                                                                                                                                                                                      |
| 456 | A2A274           | 11                   | 44             | 20.5                  | 805    | 87820  | 7.4 | Aconitase 2, mitochondrial                                                                                                                                                                                                                                        |
| 457 | Q8IXB1           | 11                   | 36             | 18.4                  | 793    | 91080  | 7.2 | DnaJ homolog subfamily C member 10 precursor                                                                                                                                                                                                                      |
| 458 | A4D229           | 11                   | 44             | 16.9                  | 893    | 98902  | 8.7 | KIAA1228 protein                                                                                                                                                                                                                                                  |
| 459 | Q6P179           | 11                   | 18             | 15.5                  | 915    | 105526 | 6.8 | LRAP protein                                                                                                                                                                                                                                                      |
| 459 | Q9HBX2           | 11                   | 18             | 14.8                  | 960    | 110462 | 6.7 | Aminopeptidase                                                                                                                                                                                                                                                    |
| 459 | Q7Z5K1           | 11                   | 18             | 14.8                  | 960    | 110447 | 6.7 | Leukocyte-derived arginine aminopeptidase long form variant                                                                                                                                                                                                       |
| 460 | Q15042           | 11                   | 30             | 15.2                  | 981    | 110524 | 5.6 | Rab3 GTPase-activating protein catalytic subunit                                                                                                                                                                                                                  |
| 461 | Q8N163           | 11                   | 26             | 15                    | 923    | 102902 | 5.2 | Protein KIAA1967                                                                                                                                                                                                                                                  |
| 461 | Q8N163-2         | 11                   | 26             | 15                    | 923    | 103143 | 5.4 | Isoform 2 of Q8N163                                                                                                                                                                                                                                               |
| 461 | UPI00001AEEB7    | 11                   | 26             | 14.9                  | 925    | 103030 | 5.2 | p30 DBC protein                                                                                                                                                                                                                                                   |
| 462 | P49736           | 11                   | 22             | 14.7                  | 904    | 101896 | 5.5 | DNA replication licensing factor MCM2                                                                                                                                                                                                                             |
| 463 | Q5JRX3           | 11                   | 19             | 12.4                  | 1037   | 117455 | 7   | Presequence protease, mitochondrial precursor                                                                                                                                                                                                                     |
| 463 | UPI000045634B    | 11                   | 19             | 12.4                  | 1037   | 117448 | 6.9 | Presequence protease, mitochondrial precursor (EC 3.4.24.-) (hPreP) (Pitrilysin metalloproteinase 1) (Metalloprotease 1) (hMP1).                                                                                                                                  |
| 463 | UPI00001F8A38    | 11                   | 19             | 12.4                  | 1037   | 117413 | 6.9 | metalloprotease 1                                                                                                                                                                                                                                                 |

| No. | Accession Number | Unique Peptide Count | Spectrum Count | Sequence Coverage (%) | Length | MolWt  | pI  | Descriptive Name                                                                                                                                                          |
|-----|------------------|----------------------|----------------|-----------------------|--------|--------|-----|---------------------------------------------------------------------------------------------------------------------------------------------------------------------------|
| 463 | UPI000013C859    | 11                   | 19             | 12.4                  | 1037   | 117410 | 7   | Presequence protease, mitochondrial precursor (EC 3.4.24.-) (hPreP) (Pitriylsin metalloproteinase 1) (Metalloprotease 1) (hMP1).                                          |
| 463 | Q5JRX3-2         | 11                   | 19             | 12.4                  | 1038   | 117554 | 7   | Isoform 2 of Q5JRX3                                                                                                                                                       |
| 464 | UPI0000441EF9    | 11                   | 26             | 11.6                  | 1092   | 124106 | 7.7 | formin-like 2                                                                                                                                                             |
| 464 | Q96PY5           | 11                   | 26             | 11.4                  | 1112   | 126314 | 8.2 | Formin-like protein 2                                                                                                                                                     |
| 465 | O95819           | 11                   | 25             | 11.1                  | 1239   | 142101 | 7.5 | Mitogen-activated protein kinase kinase kinase 4                                                                                                                          |
| 466 | P26006-2         | 11                   | 37             | 11.2                  | 1051   | 116612 | 6.8 | Isoform Alpha                                                                                                                                                             |
| 466 | P26006           | 11                   | 37             | 11.1                  | 1066   | 118698 | 7   | Integrin alpha-3 precursor (Galactoprotein B3) (GAPB3) (VLA-3 alpha chain) (FRP-2) (CD49c antigen) [Contains: Integrin alpha-3 heavy chain; Integrin alpha-3 light chain] |
| 466 | UPI0000140781    | 11                   | 37             | 11.1                  | 1066   | 118756 | 7   | integrin alpha 3 isoform b, precursor                                                                                                                                     |
| 467 | Q8TAQ2-2         | 11                   | 35             | 11.2                  | 1130   | 124841 | 5.6 | Isoform 2 of Q8TAQ2                                                                                                                                                       |
| 467 | Q59G16           | 11                   | 35             | 11                    | 1156   | 127377 | 5.5 | SWI/SNF-related matrix-associated actin-dependent regulator of chromatin c2 isoform b variant                                                                             |
| 467 | Q59GV3           | 11                   | 35             | 10.9                  | 1164   | 128088 | 5.6 | SWI/SNF-related matrix-associated actin-dependent regulator of chromatin c2 isoform b variant                                                                             |
| 467 | Q8TAQ2           | 11                   | 35             | 10.5                  | 1214   | 132879 | 5.7 | SWI/SNF-related matrix-associated actin-dependent regulator of chromatin subfamily C member 2                                                                             |
| 468 | UPI00001610D5    | 11                   | 30             | 11.3                  | 1155   | 129438 | 8.5 | DEAH (Asp-Glu-Ala-His) box polypeptide 30 isoform 2                                                                                                                       |
| 468 | Q7L2E3           | 11                   | 30             | 11                    | 1194   | 133938 | 8.8 | Putative ATP-dependent RNA helicase DHX30                                                                                                                                 |
| 469 | P55011-3         | 11                   | 27             | 10.9                  | 1196   | 129679 | 6.5 | Isoform 2 of P55011                                                                                                                                                       |
| 469 | P55011           | 11                   | 27             | 10.7                  | 1212   | 131447 | 6.4 | Solute carrier family 12 member 2 (Bumetanide-sensitive sodium-(potassium)-chloride cotransporter 1)                                                                      |
| 469 | UPI0000D61674    | 11                   | 27             | 10.7                  | 1211   | 131391 | 6.5 | Solute carrier family 12 member 2 (Bumetanide-sensitive sodium-(potassium)-chloride cotransporter 1) (Basolateral Na-K-Cl symporter).                                     |
| 470 | UPI000046FFDC    | 11                   | 25             | 10.8                  | 1588   | 179483 | 7.7 | Ras GTPase-activating-like protein IQGAP3.                                                                                                                                |
| 470 | A2RRC9           | 11                   | 25             | 10.5                  | 1631   | 184517 | 7.5 | IQ motif containing GTPase activating protein 3                                                                                                                           |
| 470 | UPI0000231C93    | 11                   | 25             | 10.5                  | 1631   | 184598 | 7.6 | IQ motif containing GTPase activating protein 3                                                                                                                           |
| 470 | UPI000021D298    | 11                   | 25             | 10.5                  | 1633   | 184856 | 7.6 | Ras GTPase-activating-like protein IQGAP3.                                                                                                                                |
| 470 | Q86VI3           | 11                   | 25             | 10.5                  | 1631   | 184545 | 7.5 | Ras GTPase-activating-like protein IQGAP3                                                                                                                                 |
| 470 | Q5T3H8           | 11                   | 25             | 10.5                  | 1631   | 184698 | 7.6 | IQ motif containing GTPase activating protein 3                                                                                                                           |

| No. | Accession Number | Unique Peptide Count | Spectrum Count | Sequence Coverage (%) | Length | MolWt  | pI   | Descriptive Name                                                                                                                                                                                                                                                |
|-----|------------------|----------------------|----------------|-----------------------|--------|--------|------|-----------------------------------------------------------------------------------------------------------------------------------------------------------------------------------------------------------------------------------------------------------------|
| 471 | UPI0000D62364    | 11                   | 24             | 10.4                  | 1309   | 144909 | 5.2  | C-jun-amino-terminal kinase-interacting protein 4 (JNK-interacting protein 4) (JIP-4) (JNK-associated leucine-zipper protein) (JLP) (Sperm-associated antigen 9) (Mitogen-activated protein kinase 8- interacting protein 4) (Human lung cancer protein 6) (HLC |
| 471 | UPI0000D62363    | 11                   | 24             | 10.4                  | 1313   | 145362 | 5.2  | C-jun-amino-terminal kinase-interacting protein 4 (JNK-interacting protein 4) (JIP-4) (JNK-associated leucine-zipper protein) (JLP) (Sperm-associated antigen 9) (Mitogen-activated protein kinase 8- interacting protein 4) (Human lung cancer protein 6) (HLC |
| 471 | O60271-4         | 11                   | 24             | 10.4                  | 1307   | 144681 | 5.2  | Isoform 4 of O60271                                                                                                                                                                                                                                             |
| 471 | O60271-2         | 11                   | 24             | 10.4                  | 1311   | 145135 | 5.2  | Isoform 2 of O60271                                                                                                                                                                                                                                             |
| 471 | O60271           | 11                   | 24             | 10.3                  | 1321   | 146205 | 5.1  | C-jun-amino-terminal kinase-interacting protein 4                                                                                                                                                                                                               |
| 472 | P52701           | 11                   | 33             | 9.6                   | 1360   | 152785 | 6.9  | DNA mismatch repair protein MSH6                                                                                                                                                                                                                                |
| 473 | O95347           | 11                   | 28             | 9.5                   | 1197   | 135780 | 8.6  | Structural maintenance of chromosomes protein 2                                                                                                                                                                                                                 |
| 473 | UPI0000457786    | 11                   | 28             | 9.5                   | 1195   | 135549 | 8.6  | Structural maintenance of chromosomes protein 2 (Chromosome-associated protein E) (hCAP-E) (XCAP-E homolog).                                                                                                                                                    |
| 473 | Q6IEE0           | 11                   | 28             | 9.5                   | 1197   | 135656 | 8.4  | SMC2 protein                                                                                                                                                                                                                                                    |
| 474 | Q9Y451           | 11                   | 23             | 9.9                   | 1391   | 158035 | 8.6  | Androgen-induced prostate proliferative shutoff associated protein                                                                                                                                                                                              |
| 474 | Q9NTI5           | 11                   | 23             | 9.5                   | 1447   | 164666 | 8.5  | Hypothetical protein                                                                                                                                                                                                                                            |
| 474 | UPI0000D61A5E    | 11                   | 23             | 9.5                   | 1449   | 164824 | 8.5  | androgen-induced prostate proliferative shutoff associated protein                                                                                                                                                                                              |
| 474 | Q9Y2I5           | 11                   | 23             | 9.3                   | 1483   | 168415 | 8.6  | Androgen-induced proliferation inhibitor                                                                                                                                                                                                                        |
| 475 | Q7Z460-2         | 11                   | 34             | 8.8                   | 1471   | 162110 | 8.8  | Isoform 2 of Q7Z460                                                                                                                                                                                                                                             |
| 475 | A2RU21           | 11                   | 34             | 8.7                   | 1479   | 162914 | 8.8  | CLASP1 protein                                                                                                                                                                                                                                                  |
| 475 | Q7Z460-3         | 11                   | 34             | 8.6                   | 1494   | 164565 | 8.5  | Isoform 3 of Q7Z460                                                                                                                                                                                                                                             |
| 475 | Q7Z460           | 11                   | 34             | 8.4                   | 1538   | 169450 | 9    | CLIP-associating protein 1                                                                                                                                                                                                                                      |
| 476 | Q5QNZ9           | 11                   | 18             | 7.3                   | 1724   | 192593 | 5.7  | Poly (ADP-ribose) polymerase family, member 4                                                                                                                                                                                                                   |
| 476 | Q9UKK3           | 11                   | 18             | 7.3                   | 1724   | 192587 | 5.7  | Poly [ADP-ribose] polymerase 4 (EC 2.4.2.30) (PARP-4) (Vault poly(ADP- ribose) polymerase)                                                                                                                                                                      |
| 477 | Q9Y4I1-2         | 11                   | 22             | 7.3                   | 1828   | 212287 | 8.6  | Isoform 2 of Q9Y4I1                                                                                                                                                                                                                                             |
| 477 | Q9Y4I1           | 11                   | 22             | 7.2                   | 1855   | 215419 | 8.5  | Myosin-Va                                                                                                                                                                                                                                                       |
| 477 | UPI0000E445E1    | 11                   | 22             | 7.2                   | 1855   | 215403 | 8.5  | myosin VA (heavy polypeptide 12, myoxin)                                                                                                                                                                                                                        |
| 478 | O75165           | 11                   | 51             | 5.8                   | 2243   | 254417 | 6.7  | DnaJ homolog subfamily C member 13                                                                                                                                                                                                                              |
| 478 | Q3L0T1           | 11                   | 51             | 5.8                   | 2243   | 254412 | 6.7  | DnaJ domain-containing protein RME-8                                                                                                                                                                                                                            |
| 479 | Q9UQ35           | 11                   | 37             | 5.5                   | 2752   | 299616 | 12.1 | Serine/arginine repetitive matrix protein 2                                                                                                                                                                                                                     |
| 480 | Q14019           | 10                   | 100            | 75.4                  | 142    | 15945  | 5.7  | Coactosin-like protein                                                                                                                                                                                                                                          |
| 481 | P22392           | 10                   | 206            | 71.7                  | 152    | 17298  | 8.4  | Nucleoside diphosphate kinase B                                                                                                                                                                                                                                 |



| No. | Accession Number | Unique Peptide Count | Spectrum Count | Sequence Coverage (%) | Length | MolWt | pI   | Descriptive Name                                                                                                               |
|-----|------------------|----------------------|----------------|-----------------------|--------|-------|------|--------------------------------------------------------------------------------------------------------------------------------|
| 482 | UPI00005E7FE3    | 10                   | 92             | 68.9                  | 167    | 19488 | 8.4  | Tubulin-tyrosine ligase-like protein 3 (HOTTL).                                                                                |
| 482 | P59998           | 10                   | 92             | 68.5                  | 168    | 19667 | 8.4  | Actin-related protein 2/3 complex subunit 4                                                                                    |
| 483 | P09211           | 10                   | 236            | 63.8                  | 210    | 23356 | 5.6  | Glutathione S-transferase P                                                                                                    |
| 484 | Q5TIF8           | 10                   | 37             | 60.3                  | 232    | 25615 | 7.9  | Adenylate kinase 2                                                                                                             |
| 484 | P54819           | 10                   | 37             | 58.6                  | 239    | 26478 | 7.8  | Adenylate kinase isoenzyme 2, mitochondrial                                                                                    |
| 485 | P62249           | 10                   | 133            | 58.2                  | 146    | 16445 | 10.2 | 40S ribosomal protein S16                                                                                                      |
| 486 | P32119           | 10                   | 79             | 56.6                  | 198    | 21892 | 6    | Peroxiredoxin-2                                                                                                                |
| 487 | P20618           | 10                   | 61             | 56.4                  | 241    | 26489 | 8.1  | Proteasome subunit beta type 1 precursor                                                                                       |
| 487 | Q53FT8           | 10                   | 61             | 56.4                  | 241    | 26491 | 8.1  | Proteasome beta 1 subunit variant                                                                                              |
| 488 | P00568           | 10                   | 43             | 56.2                  | 194    | 21635 | 8.6  | Adenylate kinase isoenzyme 1                                                                                                   |
| 488 | Q53EY8           | 10                   | 43             | 56.2                  | 194    | 21619 | 8.9  | Adenylate kinase 1 variant                                                                                                     |
| 488 | Q5T9B7           | 10                   | 43             | 51.9                  | 210    | 23411 | 8.6  | Adenylate kinase 1                                                                                                             |
| 489 | P07203           | 10                   | 47             | 56.2                  | 201    | 21899 | 6.5  | Glutathione peroxidase 1                                                                                                       |
| 489 | UPI00001B07C3    | 10                   | 47             | 55.7                  | 203    | 21938 | 6.5  | glutathione peroxidase 1 isoform 1                                                                                             |
| 490 | P62269           | 10                   | 213            | 52.6                  | 152    | 17719 | 11   | 40S ribosomal protein S18                                                                                                      |
| 491 | Q92520           | 10                   | 162            | 50.2                  | 227    | 24680 | 8.3  | Protein FAM3C precursor                                                                                                        |
| 492 | P62241           | 10                   | 161            | 50                    | 208    | 24205 | 10.3 | 40S ribosomal protein S8                                                                                                       |
| 493 | P23284           | 10                   | 260            | 49.5                  | 208    | 22742 | 9.3  | Peptidyl-prolyl cis-trans isomerase B precursor                                                                                |
| 493 | UPI0000072333    | 10                   | 260            | 47.7                  | 216    | 23743 | 9.4  | peptidylprolyl isomerase B precursor                                                                                           |
| 493 | Q6IBH5           | 10                   | 260            | 47.7                  | 216    | 23728 | 9.4  | Peptidyl-prolyl cis-trans isomerase                                                                                            |
| 494 | Q15691           | 10                   | 29             | 48.9                  | 268    | 29999 | 5.1  | Microtubule-associated protein RP/EB family member 1                                                                           |
| 495 | Q15417           | 10                   | 51             | 47.7                  | 329    | 36414 | 6.1  | Calponin-3                                                                                                                     |
| 496 | P62714           | 10                   | 41             | 47.2                  | 309    | 35575 | 5.4  | Serine/threonine-protein phosphatase 2A catalytic subunit beta isoform                                                         |
| 496 | Q8WZ56           | 10                   | 41             | 47.2                  | 309    | 35631 | 5.4  | Protein phosphatase type 2A catalytic subunit                                                                                  |
| 496 | Q5U017           | 10                   | 41             | 47.2                  | 309    | 35605 | 5.4  | Protein phosphatase 2 (Formerly 2A), catalytic subunit, beta isoform                                                           |
| 497 | UPI0000129B77    | 10                   | 57             | 46.6                  | 290    | 31371 | 8.1  | mitochondrial short-chain enoyl-coenzyme A hydratase 1 precursor                                                               |
| 498 | Q6IPN0           | 10                   | 225            | 44.9                  | 343    | 36918 | 4.8  | RTN4 protein                                                                                                                   |
| 498 | Q7L7Q6           | 10                   | 225            | 41.3                  | 373    | 40318 | 4.8  | RTN4                                                                                                                           |
| 499 | Q16698           | 10                   | 58             | 44.5                  | 335    | 36068 | 9.3  | 2,4-dienoyl-CoA reductase, mitochondrial precursor                                                                             |
| 500 | P60900           | 10                   | 99             | 43.9                  | 246    | 27399 | 6.7  | Proteasome subunit alpha type 6                                                                                                |
| 501 | P06493           | 10                   | 43             | 42.8                  | 297    | 34095 | 8.4  | Cell division control protein 2 homolog                                                                                        |
| 501 | UPI000013EBE9    | 10                   | 43             | 42.8                  | 297    | 34081 | 8.4  | Cell division control protein 2 homolog (EC 2.7.11.22) (EC 2.7.11.23) (p34 protein kinase) (Cyclin-dependent kinase 1) (CDK1). |
| 502 | P28482           | 10                   | 27             | 42.5                  | 360    | 41390 | 7    | Mitogen-activated protein kinase 1                                                                                             |
| 502 | UPI0000F0A51A    | 10                   | 27             | 40.3                  | 380    | 43553 | 7.3  | Mitogen-activated protein kinase 1                                                                                             |
| 503 | UPI000013EEEE0   | 10                   | 70             | 47.8                  | 293    | 31479 | 7.6  | PREDICTED: similar to voltage-dependent anion channel 2                                                                        |
| 503 | P45880-5         | 10                   | 70             | 47.6                  | 294    | 31566 | 7.6  | Isoform 5 of P45880                                                                                                            |

| No. | Accession Number | Unique Peptide Count | Spectrum Count | Sequence Coverage (%) | Length | MolWt | pI   | Descriptive Name                                                                                                                       |
|-----|------------------|----------------------|----------------|-----------------------|--------|-------|------|----------------------------------------------------------------------------------------------------------------------------------------|
| 503 | UPI0000D611B0    | 10                   | 70             | 47.3                  | 296    | 31721 | 7.6  | UPI0000D611B0 UniRef100 entry                                                                                                          |
| 503 | UPI00003666E7    | 10                   | 70             | 42.3                  | 331    | 36232 | 6.7  | Voltage-dependent anion-selective channel protein 2 (VDAC-2) (hVDAC2) (Outer mitochondrial membrane protein porin 2).                  |
| 503 | P45880-3         | 10                   | 70             | 42.2                  | 332    | 36288 | 6.7  | Isoform 3 of P45880                                                                                                                    |
| 504 | P07858           | 10                   | 66             | 41                    | 339    | 37822 | 6.3  | Cathepsin B precursor (EC 3.4.22.1) (Cathepsin B1) (APP secretase) (APPS) [Contains: Cathepsin B light chain; Cathepsin B heavy chain] |
| 505 | P62826           | 10                   | 76             | 39.8                  | 216    | 24423 | 7.5  | GTP-binding nuclear protein Ran                                                                                                        |
| 506 | P46777           | 10                   | 82             | 38.4                  | 297    | 34363 | 9.7  | 60S ribosomal protein L5                                                                                                               |
| 507 | P18124           | 10                   | 110            | 37.9                  | 248    | 29226 | 10.7 | 60S ribosomal protein L7                                                                                                               |
| 507 | Q3KQU0           | 10                   | 110            | 29.6                  | 318    | 37022 | 10.7 | RPL7 protein                                                                                                                           |
| 508 | Q53HL6           | 10                   | 30             | 37.2                  | 374    | 42471 | 5.6  | Dendritic cell protein variant                                                                                                         |
| 508 | Q7L2H7           | 10                   | 30             | 37.2                  | 374    | 42503 | 5.6  | PCI domain containing 1                                                                                                                |
| 509 | P62424           | 10                   | 65             | 35                    | 266    | 29996 | 10.6 | 60S ribosomal protein L7a                                                                                                              |
| 509 | UPI0000D62425    | 10                   | 65             | 34.4                  | 270    | 30548 | 10.7 | similar to 60S ribosomal protein L7a (Surfeit locus protein 3) (LOC645846), mRNA                                                       |
| 510 | Q96DB5           | 10                   | 30             | 34.7                  | 314    | 35808 | 8.5  | Protein FAM82B                                                                                                                         |
| 510 | UPI0000DD7F20    | 10                   | 30             | 20.1                  | 541    | 59651 | 9.4  | PREDICTED: similar to Protein FAM82B                                                                                                   |
| 511 | O00303           | 10                   | 63             | 34.2                  | 357    | 37564 | 5.4  | Eukaryotic translation initiation factor 3 subunit 5                                                                                   |
| 512 | Q96BS4           | 10                   | 59             | 41.5                  | 260    | 28449 | 9.4  | FBL protein                                                                                                                            |
| 512 | P22087           | 10                   | 59             | 33.6                  | 321    | 33784 | 10.2 | rRNA 2'-O-methyltransferase fibrillar                                                                                                  |
| 513 | Q13148           | 10                   | 33             | 33.1                  | 414    | 44740 | 6.2  | TAR DNA-binding protein 43                                                                                                             |
| 514 | P51991-2         | 10                   | 93             | 34.6                  | 356    | 37029 | 8.3  | Isoform 2 of P51991                                                                                                                    |
| 514 | P51991           | 10                   | 93             | 32.5                  | 378    | 39595 | 9    | Heterogeneous nuclear ribonucleoprotein A3                                                                                             |
| 515 | O00154-6         | 10                   | 52             | 37.4                  | 329    | 36568 | 7.8  | Isoform 6 of O00154                                                                                                                    |
| 515 | O00154-4         | 10                   | 52             | 36.4                  | 338    | 37420 | 7.3  | Isoform 4 of O00154                                                                                                                    |
| 515 | O00154           | 10                   | 52             | 32.4                  | 380    | 41796 | 8.5  | Cytosolic acyl coenzyme A thioester hydrolase                                                                                          |
| 516 | Q99733           | 10                   | 75             | 31.7                  | 375    | 42823 | 4.7  | Nucleosome assembly protein 1-like 4                                                                                                   |
| 516 | UPI0000D6258B    | 10                   | 75             | 31.6                  | 377    | 43011 | 4.7  | Nucleosome assembly protein 1-like 4 (Nucleosome assembly protein 2) (NAP2).                                                           |
| 517 | O43390           | 10                   | 48             | 29.1                  | 633    | 70943 | 8.1  | Heterogeneous nuclear ribonucleoprotein R                                                                                              |
| 518 | Q9Y6E2           | 10                   | 28             | 28.9                  | 419    | 48162 | 6.7  | Basic leucine zipper and W2 domain-containing protein 2                                                                                |
| 519 | Q13283           | 10                   | 71             | 28.8                  | 466    | 52164 | 5.5  | Ras GTPase-activating protein-binding protein 1                                                                                        |
| 519 | Q6FI03           | 10                   | 71             | 28.8                  | 466    | 52164 | 5.6  | G3BP protein                                                                                                                           |
| 520 | O15371           | 10                   | 38             | 28.6                  | 548    | 63973 | 6    | Eukaryotic translation initiation factor 3 subunit 7                                                                                   |
| 521 | UPI0000163C03    | 10                   | 32             | 29.2                  | 472    | 53216 | 8.7  | DEAD (Asp-Glu-Ala-Asp) box polypeptide 6                                                                                               |
| 521 | P26196           | 10                   | 32             | 28.6                  | 483    | 54417 | 8.7  | Probable ATP-dependent RNA helicase DDX6                                                                                               |
| 522 | P04062           | 10                   | 19             | 28                    | 536    | 59716 | 7.6  | Glucosylceramidase precursor                                                                                                           |
| 523 | O94808           | 10                   | 22             | 26.8                  | 682    | 76931 | 7.4  | Glucosamine--fructose-6-phosphate aminotransferase [isomerizing] 2                                                                     |

| No. | Accession Number | Unique Peptide Count | Spectrum Count | Sequence Coverage (%) | Length | MolWt | pI  | Descriptive Name                                                                                                                                                                                                |
|-----|------------------|----------------------|----------------|-----------------------|--------|-------|-----|-----------------------------------------------------------------------------------------------------------------------------------------------------------------------------------------------------------------|
| 523 | UPI000049E025    | 10                   | 22             | 26.8                  | 684    | 77190 | 7.5 | Glucosamine--fructose-6-phosphate aminotransferase [isomerizing] 2 (EC 2.6.1.16) (Hexosephosphate aminotransferase 2) (D-fructose-6-phosphate amidotransferase 2) (GFAT 2) (GFAT2).                             |
| 524 | P04040           | 10                   | 17             | 25.4                  | 527    | 59756 | 7.4 | Catalase                                                                                                                                                                                                        |
| 525 | O00232           | 10                   | 27             | 25                    | 456    | 52904 | 7.6 | 26S proteasome non-ATPase regulatory subunit 12                                                                                                                                                                 |
| 526 | Q5HYG8           | 10                   | 48             | 25.3                  | 483    | 53465 | 8.2 | Hypothetical protein DKFZp686P09201                                                                                                                                                                             |
| 526 | P34897           | 10                   | 48             | 24.2                  | 504    | 55993 | 8.5 | Serine hydroxymethyltransferase, mitochondrial precursor                                                                                                                                                        |
| 526 | Q53ET4           | 10                   | 48             | 24.2                  | 504    | 55974 | 8.4 | Serine hydroxymethyltransferase 2 (Mitochondrial) variant                                                                                                                                                       |
| 527 | Q13418           | 10                   | 20             | 22.8                  | 452    | 51419 | 8.1 | Integrin-linked protein kinase                                                                                                                                                                                  |
| 528 | Q7Z5D5           | 10                   | 30             | 32                    | 384    | 43736 | 5.5 | Medulloblastoma antigen MU-MB-2.50                                                                                                                                                                              |
| 528 | Q7RTQ9           | 10                   | 30             | 22.9                  | 538    | 61202 | 5.8 | Kinesin light chain 1A                                                                                                                                                                                          |
| 528 | Q7RTQ7           | 10                   | 30             | 22.5                  | 547    | 62192 | 5.7 | Kinesin light chain 1F                                                                                                                                                                                          |
| 528 | Q07866-8         | 10                   | 30             | 22.5                  | 547    | 62302 | 6   | Isoform S of Q07866                                                                                                                                                                                             |
| 528 | Q07866-2         | 10                   | 30             | 22.1                  | 556    | 63293 | 5.9 | Isoform C of Q07866                                                                                                                                                                                             |
| 528 | UPI00004567D3    | 10                   | 30             | 22                    | 559    | 63686 | 5.9 | Kinesin light chain 1 (KLC 1).                                                                                                                                                                                  |
| 528 | Q07866-3         | 10                   | 30             | 22                    | 560    | 63796 | 6.4 | Isoform G of Q07866                                                                                                                                                                                             |
| 528 | UPI00004567D1    | 10                   | 30             | 21.7                  | 568    | 64656 | 6.4 | Kinesin light chain 1 (KLC 1).                                                                                                                                                                                  |
| 528 | Q07866           | 10                   | 30             | 21.6                  | 569    | 64786 | 6.3 | Kinesin light chain 1                                                                                                                                                                                           |
| 528 | UPI0000D62453    | 10                   | 30             | 21.2                  | 579    | 65565 | 6   | Kinesin light chain 1 (KLC 1).                                                                                                                                                                                  |
| 528 | Q07866-7         | 10                   | 30             | 21.2                  | 580    | 65768 | 6   | Isoform P of Q07866                                                                                                                                                                                             |
| 528 | Q7RTQ8           | 10                   | 30             | 20.3                  | 607    | 68964 | 7.3 | Kinesin light chain 1O                                                                                                                                                                                          |
| 528 | Q7RTQ2           | 10                   | 30             | 20.2                  | 609    | 68762 | 6   | Kinesin light chain 1E                                                                                                                                                                                          |
| 528 | UPI0000D62452    | 10                   | 30             | 20                    | 616    | 69894 | 7.3 | Kinesin light chain 1 (KLC 1).                                                                                                                                                                                  |
| 528 | Q7RTQ3           | 10                   | 30             | 20                    | 614    | 69242 | 6   | Kinesin light chain 1D                                                                                                                                                                                          |
| 528 | Q7RTQ1           | 10                   | 30             | 20                    | 616    | 69954 | 7.1 | Kinesin light chain 1K                                                                                                                                                                                          |
| 528 | Q7RTQ0           | 10                   | 30             | 19.7                  | 624    | 70496 | 6.8 | Kinesin light chain 1N                                                                                                                                                                                          |
| 528 | Q07866-6         | 10                   | 30             | 19.7                  | 624    | 70482 | 6.8 | Isoform N of Q07866                                                                                                                                                                                             |
| 528 | UPI00004567D4    | 10                   | 30             | 19.5                  | 632    | 71342 | 6.8 | Kinesin light chain 1 (KLC 1).                                                                                                                                                                                  |
| 528 | UPI00004567D2    | 10                   | 30             | 19.4                  | 634    | 71744 | 7.8 | Kinesin light chain 1 (KLC 1).                                                                                                                                                                                  |
| 528 | Q7RTP8           | 10                   | 30             | 19.4                  | 633    | 71487 | 6.7 | Kinesin light chain 1J                                                                                                                                                                                          |
| 528 | Q07866-9         | 10                   | 30             | 19.4                  | 635    | 71874 | 7.7 | Isoform I of Q07866                                                                                                                                                                                             |
| 528 | Q07866-4         | 10                   | 30             | 19.4                  | 633    | 71473 | 6.7 | Isoform J of Q07866                                                                                                                                                                                             |
| 529 | P42166           | 10                   | 42             | 21.5                  | 694    | 75492 | 7.7 | Lamina-associated polypeptide 2 isoform alpha (Thymopietin isoform alpha) (TP alpha) (Thymopietin-related peptide isoform alpha) (TPRP isoform alpha) [Contains: Thymopietin (TP) (Splenin); Thymopentin (TP5)] |
| 530 | Q96GF2           | 10                   | 27             | 21.5                  | 633    | 68448 | 5.3 | GSPT1 protein                                                                                                                                                                                                   |
| 531 | P12268           | 10                   | 34             | 21.4                  | 514    | 55805 | 6.9 | Inosine-5'-monophosphate dehydrogenase 2                                                                                                                                                                        |
| 532 | Q96N86           | 10                   | 60             | 21.3                  | 517    | 59574 | 8.6 | CDNA FLJ31237 fis, clone KIDNE2004846, highly similar to 26S PROTEASOME REGULATORY SUBUNIT S3                                                                                                                   |
| 532 | O43242           | 10                   | 60             | 20.6                  | 534    | 60978 | 8.4 | 26S proteasome non-ATPase regulatory subunit 3                                                                                                                                                                  |
| 532 | Q6IBN0           | 10                   | 60             | 20.6                  | 534    | 60946 | 8.4 | PSMD3 protein                                                                                                                                                                                                   |
| 533 | Q8N4P8           | 10                   | 22             | 19.6                  | 632    | 73709 | 9.6 | GTPBP4 protein                                                                                                                                                                                                  |

| No. | Accession Number | Unique Peptide Count | Spectrum Count | Sequence Coverage (%) | Length | MolWt  | pI  | Descriptive Name                                                                                                                                                                                                                  |
|-----|------------------|----------------------|----------------|-----------------------|--------|--------|-----|-----------------------------------------------------------------------------------------------------------------------------------------------------------------------------------------------------------------------------------|
| 533 | UPI00001AE86D    | 10                   | 22             | 19.6                  | 634    | 73852  | 9.5 | Nucleolar GTP-binding protein 1 (Chronic renal failure gene protein) (GTP-binding protein NGB).                                                                                                                                   |
| 533 | Q9BZE4           | 10                   | 22             | 19.6                  | 634    | 73965  | 9.5 | Nucleolar GTP-binding protein 1                                                                                                                                                                                                   |
| 534 | Q27J83           | 10                   | 32             | 19.7                  | 707    | 77762  | 5.9 | Chromosome 14 open reading frame 173 isoform 1                                                                                                                                                                                    |
| 534 | Q27J81           | 10                   | 32             | 19.4                  | 716    | 78769  | 5.6 | Uncharacterized protein C14orf173                                                                                                                                                                                                 |
| 535 | P51659           | 10                   | 33             | 18.5                  | 736    | 79686  | 8.8 | Peroxisomal multifunctional enzyme type 2                                                                                                                                                                                         |
| 536 | P42224           | 10                   | 22             | 18                    | 750    | 87335  | 6.1 | Signal transducer and activator of transcription 1-alpha/beta                                                                                                                                                                     |
| 536 | Q68D00           | 10                   | 22             | 18                    | 750    | 87363  | 6.1 | Hypothetical protein DKFZp686B04100                                                                                                                                                                                               |
| 537 | Q08J23           | 10                   | 31             | 18                    | 767    | 86499  | 6.9 | Putative 5-methylcytosine methyltransferase                                                                                                                                                                                       |
| 537 | UPI000020BF2B    | 10                   | 31             | 18                    | 767    | 86471  | 6.8 | NOL1/NOP2/Sun domain family 2 protein                                                                                                                                                                                             |
| 538 | Q9H845           | 10                   | 23             | 17.6                  | 621    | 68760  | 8   | Acyl-CoA dehydrogenase family member 9, mitochondrial precursor                                                                                                                                                                   |
| 539 | P33993           | 10                   | 20             | 16.4                  | 719    | 81308  | 6.5 | DNA replication licensing factor MCM7                                                                                                                                                                                             |
| 540 | Q9H307           | 10                   | 24             | 15.8                  | 717    | 81614  | 7.2 | Pinin                                                                                                                                                                                                                             |
| 540 | UPI000013C70D    | 10                   | 24             | 15.8                  | 717    | 81628  | 7.2 | Pinin (140 kDa nuclear and cell adhesion-related phosphoprotein) (Domain-rich serine protein) (DRS-protein) (DRSP) (Melanoma metastasis clone A protein) (Desmosome-associated protein) (SR-like protein) (Nuclear protein SDK3). |
| 541 | Q86XP3           | 10                   | 25             | 15.4                  | 938    | 102975 | 7   | ATP-dependent RNA helicase DDX42                                                                                                                                                                                                  |
| 541 | UPI0000456AEB    | 10                   | 25             | 15.4                  | 938    | 103005 | 6.9 | DEAD box polypeptide 42 protein                                                                                                                                                                                                   |
| 542 | Q96P70           | 10                   | 48             | 14.5                  | 1041   | 115963 | 4.8 | Importin-9                                                                                                                                                                                                                        |
| 543 | A0AV56           | 10                   | 28             | 13.4                  | 917    | 102855 | 5.5 | Scaffold attachment factor B                                                                                                                                                                                                      |
| 543 | Q15424           | 10                   | 28             | 13.4                  | 915    | 102642 | 5.5 | Scaffold attachment factor B                                                                                                                                                                                                      |
| 544 | P53992           | 10                   | 28             | 13.2                  | 1094   | 118315 | 7.1 | Protein transport protein Sec24C                                                                                                                                                                                                  |
| 544 | UPI000013F621    | 10                   | 28             | 13.2                  | 1094   | 118325 | 7.1 | SEC24-related protein C                                                                                                                                                                                                           |
| 545 | A0AVT1           | 10                   | 20             | 12.6                  | 1052   | 117970 | 6.1 | Ubiquitin-activating enzyme E1-like protein 2                                                                                                                                                                                     |
| 545 | UPI00001910DA    | 10                   | 20             | 12.6                  | 1052   | 117955 | 6.2 | ubiquitin-activating enzyme E1-like 2                                                                                                                                                                                             |
| 546 | O94804           | 10                   | 18             | 12.1                  | 968    | 112135 | 6.9 | Serine/threonine-protein kinase 10                                                                                                                                                                                                |
| 546 | UPI0000457386    | 10                   | 18             | 12                    | 974    | 112748 | 6.8 | Serine/threonine-protein kinase 10 (EC 2.7.11.1) (Lymphocyte-oriented kinase).                                                                                                                                                    |
| 547 | Q8TCJ2           | 10                   | 71             | 11.7                  | 826    | 93674  | 8.9 | Dolichyl-diphosphooligosaccharide-protein glycosyltransferase subunit STT3B                                                                                                                                                       |
| 548 | Q59EA1           | 10                   | 14             | 11.7                  | 1081   | 122130 | 8.6 | Transcription elongation regulator 1 variant                                                                                                                                                                                      |
| 548 | O14776           | 10                   | 14             | 11.6                  | 1098   | 123960 | 8.7 | Transcription elongation regulator 1                                                                                                                                                                                              |
| 548 | UPI000013E374    | 10                   | 14             | 11.6                  | 1098   | 123901 | 8.6 | transcription elongation regulator 1 isoform 1                                                                                                                                                                                    |

| No. | Accession Number | Unique Peptide Count | Spectrum Count | Sequence Coverage (%) | Length | MolWt  | pI   | Descriptive Name                                                                                                                                                               |
|-----|------------------|----------------------|----------------|-----------------------|--------|--------|------|--------------------------------------------------------------------------------------------------------------------------------------------------------------------------------|
| 549 | P35442           | 10                   | 26             | 11.3                  | 1172   | 129955 | 4.8  | Thrombospondin-2 precursor                                                                                                                                                     |
| 549 | Q5RI52           | 10                   | 26             | 11.3                  | 1172   | 129991 | 4.8  | Thrombospondin 2                                                                                                                                                               |
| 550 | Q9HAV4           | 10                   | 32             | 11.1                  | 1204   | 136311 | 5.8  | Exportin-5                                                                                                                                                                     |
| 550 | UPI00004A3AA6    | 10                   | 32             | 11.1                  | 1204   | 136260 | 5.8  | Exportin-5 (Exp5) (Ran-binding protein 21).                                                                                                                                    |
| 551 | P29317           | 10                   | 36             | 11                    | 976    | 108254 | 6.2  | Ephrin type-A receptor 2 precursor                                                                                                                                             |
| 551 | Q8N3Z2           | 10                   | 36             | 11                    | 976    | 108266 | 6.2  | Ephrin receptor                                                                                                                                                                |
| 552 | P07996           | 10                   | 28             | 10.3                  | 1170   | 129383 | 4.9  | Thrombospondin-1 precursor                                                                                                                                                     |
| 552 | Q59E99           | 10                   | 28             | 9.9                   | 1225   | 134849 | 5    | Thrombospondin 1 variant                                                                                                                                                       |
| 553 | UPI00004565B7    | 10                   | 22             | 11.1                  | 993    | 114069 | 6.3  | ELKS/RAB6-interacting/CAST family member 1 (RAB6-interacting protein 2) (ERC protein 1).                                                                                       |
| 553 | Q8IUD2-2         | 10                   | 22             | 11.1                  | 992    | 113920 | 6.3  | Isoform 2 of Q8IUD2                                                                                                                                                            |
| 553 | Q8IUD2-3         | 10                   | 22             | 10.1                  | 1088   | 124904 | 6.1  | Isoform 3 of Q8IUD2                                                                                                                                                            |
| 553 | Q8IUD2           | 10                   | 22             | 9.9                   | 1116   | 128086 | 6    | ELKS/RAB6-interacting/CAST family member 1                                                                                                                                     |
| 554 | Q13523           | 10                   | 31             | 9.6                   | 1007   | 116973 | 10.3 | Serine/threonine-protein kinase PRP4 homolog                                                                                                                                   |
| 554 | Q8IVC3           | 10                   | 31             | 9.6                   | 1007   | 116991 | 10.3 | PRP4 pre-mRNA processing factor 4 homolog B                                                                                                                                    |
| 554 | Q5TAY8           | 10                   | 31             | 9.6                   | 1007   | 116987 | 10.3 | PRP4 pre-mRNA processing factor 4 homolog B                                                                                                                                    |
| 555 | Q92900-2         | 10                   | 27             | 9.4                   | 1118   | 123036 | 6.7  | Isoform 2 of Q92900                                                                                                                                                            |
| 555 | Q92900           | 10                   | 27             | 9.3                   | 1129   | 124345 | 6.6  | Regulator of nonsense transcripts 1                                                                                                                                            |
| 556 | Q5SW80           | 10                   | 14             | 8.3                   | 1557   | 171972 | 7.4  | Centrosomal protein 170kDa                                                                                                                                                     |
| 556 | Q5SW79           | 10                   | 14             | 8.1                   | 1584   | 175292 | 7.1  | Centrosomal protein of 170 kDa                                                                                                                                                 |
| 556 | UPI000045632C    | 10                   | 14             | 8.1                   | 1585   | 175435 | 7.2  | centrosomal protein 170kDa isoform gamma                                                                                                                                       |
| 557 | Q9H2M9           | 10                   | 16             | 8                     | 1393   | 155984 | 5.6  | Rab3 GTPase-activating protein non-catalytic subunit                                                                                                                           |
| 557 | UPI00004562FB    | 10                   | 16             | 8                     | 1393   | 155941 | 5.6  | Rab3 GTPase-activating protein non-catalytic subunit (Rab3 GTPase- activating protein 150 kDa subunit) (Rab3-GAP p150) (Rab3-GAP regulatory subunit) (RAB3-GAP150) (RGAP-iso). |
| 558 | P51532           | 10                   | 19             | 7.4                   | 1647   | 184644 | 7.9  | Probable global transcription activator SNF2L4                                                                                                                                 |
| 558 | Q9HBD4           | 10                   | 19             | 7.3                   | 1679   | 188147 | 8.2  | SMARCA4 isoform 2                                                                                                                                                              |
| 559 | P07942           | 10                   | 34             | 7.1                   | 1786   | 198065 | 5    | Laminin subunit beta-1 precursor                                                                                                                                               |
| 560 | Q9Y6D6           | 10                   | 23             | 6.8                   | 1849   | 208766 | 5.9  | Brefeldin A-inhibited guanine nucleotide-exchange protein 1                                                                                                                    |
| 561 | Q92621           | 10                   | 22             | 5.3                   | 2012   | 227918 | 6.2  | Nuclear pore complex protein Nup205                                                                                                                                            |
| 561 | UPI00001D74D8    | 10                   | 22             | 5.3                   | 2012   | 227919 | 6.2  | Nuclear pore complex protein Nup205 (Nucleoporin Nup205) (205 kDa nucleoporin).                                                                                                |
| 562 | O75691           | 10                   | 32             | 4                     | 2785   | 318426 | 7.4  | Small subunit processome component 20 homolog                                                                                                                                  |
| 562 | UPI00001FB38B    | 10                   | 32             | 4                     | 2785   | 318385 | 7.4  | down-regulated in metastasis                                                                                                                                                   |
| 562 | UPI0000031EE4    | 10                   | 32             | 4                     | 2785   | 318400 | 7.4  | PREDICTED: similar to Small subunit processome component 20 homolog (Down-regulated in metastasis protein) (Protein Key-1A6) (Novel nucleolar protein 73) (NNP73)              |

| No. | Accession Number | Unique Peptide Count | Spectrum Count | Sequence Coverage (%) | Length | MolWt  | pI   | Descriptive Name                                                                                                                                                                                                         |
|-----|------------------|----------------------|----------------|-----------------------|--------|--------|------|--------------------------------------------------------------------------------------------------------------------------------------------------------------------------------------------------------------------------|
| 563 | UPI0000D626C7    | 10                   | 28             | 2.2                   | 5300   | 606141 | 5.4  | Microtubule-actin cross-linking factor 1, isoforms 1/2/3/5 (Actin cross-linking family protein 7) (Macrophin-1) (Trabeculin-alpha) (620 kDa actin-binding protein) (ABP620).                                             |
| 563 | Q9UPN3           | 10                   | 28             | 2.1                   | 5430   | 620426 | 5.4  | Microtubule-actin cross-linking factor 1, isoforms 1/2/3/5                                                                                                                                                               |
| 563 | UPI0000D626C8    | 10                   | 28             | 2.1                   | 5374   | 614212 | 5.4  | Microtubule-actin cross-linking factor 1, isoforms 1/2/3/5 (Actin cross-linking family protein 7) (Macrophin-1) (Trabeculin-alpha) (620 kDa actin-binding protein) (ABP620).                                             |
| 563 | UPI00004578EC    | 10                   | 28             | 2.1                   | 5430   | 620397 | 5.4  | Microtubule-actin cross-linking factor 1, isoforms 1/2/3/5 (Actin cross-linking family protein 7) (Macrophin-1) (Trabeculin-alpha) (620 kDa actin-binding protein) (ABP620).                                             |
| 563 | Q9UPN3-1         | 10                   | 28             | 2.1                   | 5374   | 614160 | 5.4  | Isoform 1 of Q9UPN3                                                                                                                                                                                                      |
| 564 | P07737           | 9                    | 248            | 70                    | 140    | 15054  | 8.3  | Profilin-1                                                                                                                                                                                                               |
| 565 | P30086           | 9                    | 59             | 69                    | 187    | 21057  | 7.5  | Phosphatidylethanolamine-binding protein 1 (PEBP-1) (Prostatic-binding protein) (HCNPpp) (Neuropolypeptide h3) (Raf kinase inhibitor protein) (RKIP) [Contains: Hippocampal cholinergic neurostimulating peptide (HCNP)] |
| 566 | O75947           | 9                    | 58             | 65.8                  | 161    | 18491  | 5.3  | ATP synthase D chain, mitochondrial                                                                                                                                                                                      |
| 567 | P62820           | 9                    | 204            | 64.4                  | 205    | 22678  | 6.2  | Ras-related protein Rab-1A                                                                                                                                                                                               |
| 568 | P84085           | 9                    | 231            | 63.3                  | 180    | 20530  | 6.8  | ADP-ribosylation factor 5                                                                                                                                                                                                |
| 569 | P60660           | 9                    | 149            | 60.3                  | 151    | 16930  | 4.7  | Myosin light polypeptide 6                                                                                                                                                                                               |
| 569 | Q561V9           | 9                    | 149            | 60.3                  | 151    | 16961  | 4.6  | Myosin, light chain 6, alkali, smooth muscle and non-muscle                                                                                                                                                              |
| 569 | UPI0000D62206    | 9                    | 149            | 58.3                  | 156    | 17353  | 4.7  | Myosin light polypeptide 6 (Smooth muscle and nonmuscle myosin light chain alkali 6) (Myosin light chain alkali 3) (Myosin light chain 3) (MLC-3) (LC17).                                                                |
| 570 | P25787           | 9                    | 69             | 59.4                  | 234    | 25899  | 7.4  | Proteasome subunit alpha type 2                                                                                                                                                                                          |
| 570 | Q53GF5           | 9                    | 69             | 59.4                  | 234    | 25841  | 8    | Proteasome alpha 2 subunit variant                                                                                                                                                                                       |
| 571 | P08708           | 9                    | 107            | 57                    | 135    | 15550  | 9.8  | 40S ribosomal protein S17                                                                                                                                                                                                |
| 572 | A2VCL0           | 9                    | 1006           | 56.9                  | 102    | 11377  | 11.4 | HIST2H4B protein                                                                                                                                                                                                         |
| 572 | P62805           | 9                    | 1006           | 56.3                  | 103    | 11367  | 11.4 | Histone H4                                                                                                                                                                                                               |
| 573 | Q04917           | 9                    | 45             | 56.9                  | 246    | 28219  | 4.8  | 14-3-3 protein eta                                                                                                                                                                                                       |
| 574 | P62081           | 9                    | 107            | 56.2                  | 194    | 22127  | 10.1 | 40S ribosomal protein S7                                                                                                                                                                                                 |
| 575 | Q9Y2B0           | 9                    | 45             | 56                    | 182    | 20652  | 4.9  | MIR-interacting saposin-like protein precursor                                                                                                                                                                           |
| 576 | P48047           | 9                    | 88             | 54.5                  | 213    | 23277  | 10   | ATP synthase O subunit, mitochondrial precursor                                                                                                                                                                          |
| 577 | O75396           | 9                    | 107            | 53.5                  | 215    | 24741  | 8.5  | Vesicle-trafficking protein SEC22b                                                                                                                                                                                       |
| 578 | Q05DH1           | 9                    | 42             | 55.5                  | 238    | 26714  | 8.9  | Hypothetical protein                                                                                                                                                                                                     |

| No. | Accession Number | Unique Peptide Count | Spectrum Count | Sequence Coverage (%) | Length | MolWt | pI   | Descriptive Name                                                                                                                                                                                                                                                |
|-----|------------------|----------------------|----------------|-----------------------|--------|-------|------|-----------------------------------------------------------------------------------------------------------------------------------------------------------------------------------------------------------------------------------------------------------------|
| 578 | O14818           | 9                    | 42             | 53.2                  | 248    | 27887 | 8.5  | Proteasome subunit alpha type 7                                                                                                                                                                                                                                 |
| 579 | Q9NP72           | 9                    | 39             | 52.9                  | 206    | 22977 | 5.2  | Ras-related protein Rab-18                                                                                                                                                                                                                                      |
| 580 | Q13938           | 9                    | 45             | 52.4                  | 189    | 20967 | 4.9  | Calcyphosin                                                                                                                                                                                                                                                     |
| 581 | O75347           | 9                    | 75             | 51.9                  | 108    | 12855 | 5.3  | Tubulin-specific chaperone A                                                                                                                                                                                                                                    |
| 582 | P39019           | 9                    | 213            | 50.3                  | 145    | 16060 | 10.3 | 40S ribosomal protein S19                                                                                                                                                                                                                                       |
| 582 | Q8WVX7           | 9                    | 213            | 46.5                  | 157    | 17282 | 10.5 | Ribosomal protein S19                                                                                                                                                                                                                                           |
| 583 | Q5VYC2           | 9                    | 43             | 50.2                  | 227    | 24636 | 7.2  | Protein-L-isoaspartate (D-aspartate) O-methyltransferase                                                                                                                                                                                                        |
| 583 | Q5VYC1           | 9                    | 43             | 50                    | 228    | 24679 | 6.5  | Protein-L-isoaspartate (D-aspartate) O-methyltransferase                                                                                                                                                                                                        |
| 584 | Q02543           | 9                    | 125            | 48.3                  | 176    | 20762 | 10.7 | 60S ribosomal protein L18a                                                                                                                                                                                                                                      |
| 585 | P28074           | 9                    | 52             | 46.6                  | 208    | 22897 | 8.5  | Proteasome subunit beta type 5 precursor                                                                                                                                                                                                                        |
| 585 | Q7Z3B5           | 9                    | 52             | 36.5                  | 266    | 28810 | 6.5  | Hypothetical protein DKFZp686i0180                                                                                                                                                                                                                              |
| 586 | P61254           | 9                    | 103            | 45.5                  | 145    | 17258 | 10.6 | 60S ribosomal protein L26                                                                                                                                                                                                                                       |
| 586 | Q6IBH6           | 9                    | 103            | 45.5                  | 145    | 17244 | 10.6 | RPL26 protein                                                                                                                                                                                                                                                   |
| 587 | O43399           | 9                    | 39             | 45.1                  | 206    | 22238 | 5.4  | Tumor protein D54                                                                                                                                                                                                                                               |
| 587 | UPI0000D610E3    | 9                    | 39             | 42.5                  | 219    | 23739 | 6.2  | Tumor protein D54 (hD54) (Tumor protein D52-like 2).                                                                                                                                                                                                            |
| 587 | Q5U0E0           | 9                    | 39             | 42.3                  | 220    | 23787 | 5.7  | Tumor protein D52-like 2                                                                                                                                                                                                                                        |
| 587 | Q5JWU6           | 9                    | 39             | 40.6                  | 229    | 24854 | 6.4  | Tumor protein D52-like 2                                                                                                                                                                                                                                        |
| 588 | P00491           | 9                    | 31             | 45                    | 289    | 32118 | 6.9  | Purine nucleoside phosphorylase                                                                                                                                                                                                                                 |
| 589 | Q15631           | 9                    | 97             | 44.7                  | 228    | 26183 | 6.4  | Translin                                                                                                                                                                                                                                                        |
| 590 | Q9Y6C9           | 9                    | 48             | 44.2                  | 303    | 33331 | 8    | Mitochondrial carrier homolog 2                                                                                                                                                                                                                                 |
| 591 | P54920           | 9                    | 29             | 42.7                  | 295    | 33233 | 5.4  | Alpha-soluble NSF attachment protein                                                                                                                                                                                                                            |
| 592 | Q96AG4           | 9                    | 81             | 40.7                  | 307    | 34930 | 9.6  | Leucine-rich repeat-containing protein 59                                                                                                                                                                                                                       |
| 593 | UPI0000185FC9    | 9                    | 128            | 40.6                  | 155    | 17662 | 10.4 | PREDICTED: similar to 60S ribosomal protein L23a                                                                                                                                                                                                                |
| 593 | P62750           | 9                    | 128            | 40.4                  | 156    | 17695 | 10.4 | 60S ribosomal protein L23a                                                                                                                                                                                                                                      |
| 594 | Q06323           | 9                    | 26             | 40.2                  | 249    | 28723 | 6    | Proteasome activator complex subunit 1                                                                                                                                                                                                                          |
| 594 | UPI000045675C    | 9                    | 26             | 39.7                  | 252    | 28837 | 5.4  | Proteasome activator complex subunit 1 (Proteasome activator 28-alpha subunit) (PA28alpha) (PA28a) (Activator of multicatalytic protease subunit 1) (11S regulator complex subunit alpha) (REG-alpha) (Interferon gamma up-regulated I-5111 protein) (IGUP I-51 |
| 595 | P62280           | 9                    | 49             | 39.9                  | 158    | 18431 | 10.3 | 40S ribosomal protein S11                                                                                                                                                                                                                                       |
| 596 | Q6FHN1           | 9                    | 59             | 59.8                  | 164    | 17748 | 6.6  | DUT protein                                                                                                                                                                                                                                                     |
| 596 | UPI000045684C    | 9                    | 59             | 39.2                  | 250    | 26552 | 9.6  | Deoxyuridine 5'-triphosphate nucleotidohydrolase, mitochondrial precursor (EC 3.6.1.23) (dUTPase) (dUTP pyrophosphatase).                                                                                                                                       |
| 596 | P33316           | 9                    | 59             | 38.9                  | 252    | 26706 | 9.6  | Deoxyuridine 5'-triphosphate nucleotidohydrolase, mitochondrial precursor                                                                                                                                                                                       |
| 596 | Q6NSA3           | 9                    | 59             | 38.9                  | 252    | 26563 | 9.4  | DUTP pyrophosphatase                                                                                                                                                                                                                                            |
| 597 | Q0MQG7           | 9                    | 34             | 38.8                  | 263    | 30168 | 7.5  | NADH dehydrogenase [ubiquinone] iron-sulfur protein 3, mitochondrial precursor                                                                                                                                                                                  |

| No. | Accession Number | Unique Peptide Count | Spectrum Count | Sequence Coverage (%) | Length | MolWt | pI   | Descriptive Name                                                                                            |
|-----|------------------|----------------------|----------------|-----------------------|--------|-------|------|-------------------------------------------------------------------------------------------------------------|
| 597 | O75489           | 9                    | 34             | 38.6                  | 264    | 30242 | 7.5  | NADH dehydrogenase [ubiquinone] iron-sulfur protein 3, mitochondrial precursor                              |
| 597 | Q53FM7           | 9                    | 34             | 38.6                  | 264    | 30160 | 6.7  | NADH dehydrogenase (Ubiquinone) Fe-S protein 3, 30kDa (NADH-coenzyme Q reductase) variant                   |
| 598 | P61313           | 9                    | 90             | 38.2                  | 204    | 24146 | 11.6 | 60S ribosomal protein L15                                                                                   |
| 598 | Q5T6E0           | 9                    | 90             | 38.2                  | 204    | 24174 | 11.6 | Ribosomal protein L15 pseudogene 3                                                                          |
| 599 | O15372           | 9                    | 24             | 37.5                  | 352    | 39930 | 6.5  | Eukaryotic translation initiation factor 3 subunit 3                                                        |
| 599 | Q53HR0           | 9                    | 24             | 37.5                  | 352    | 39914 | 6.5  | Eukaryotic translation initiation factor 3, subunit 3 gamma, 40kDa variant                                  |
| 600 | P52788           | 9                    | 17             | 37.4                  | 366    | 41268 | 5    | Spermine synthase                                                                                           |
| 600 | UPI0000D61D37    | 9                    | 17             | 37.4                  | 366    | 41272 | 5    | Spermine synthase (EC 2.5.1.22) (Spermidine aminopropyltransferase) (SPMSY).                                |
| 601 | P09661           | 9                    | 36             | 36.5                  | 255    | 28416 | 8.6  | U2 small nuclear ribonucleoprotein A'                                                                       |
| 601 | Q53G61           | 9                    | 36             | 36.5                  | 255    | 28402 | 8.6  | Small nuclear ribonucleoprotein polypeptide A' variant                                                      |
| 601 | Q53G21           | 9                    | 36             | 36.5                  | 255    | 28474 | 8.6  | Small nuclear ribonucleoprotein polypeptide A' variant                                                      |
| 602 | Q12907           | 9                    | 37             | 36.5                  | 356    | 40229 | 7    | Vesicular integral-membrane protein VIP36 precursor                                                         |
| 603 | P78417           | 9                    | 48             | 36.1                  | 241    | 27566 | 6.6  | Glutathione transferase omega-1                                                                             |
| 604 | P15559           | 9                    | 74             | 35.4                  | 274    | 30868 | 8.9  | NAD(P)H dehydrogenase [quinone] 1 (EC 1.6.5.2) (Quinone reductase 1) (NAD(P)H:quinone oxidoreductase 1)     |
| 605 | Q14165           | 9                    | 20             | 34.6                  | 292    | 32234 | 5.4  | Uncharacterized protein KIAA0152 precursor                                                                  |
| 606 | Q15785           | 9                    | 26             | 33                    | 309    | 34559 | 9    | Mitochondrial import receptor subunit TOM34                                                                 |
| 607 | Q5TZT4           | 9                    | 29             | 32.3                  | 350    | 38380 | 5.2  | Unr-interacting protein                                                                                     |
| 607 | Q9Y3F4           | 9                    | 29             | 32.3                  | 350    | 38438 | 5.1  | Serine-threonine kinase receptor-associated protein                                                         |
| 607 | Q9NTK0           | 9                    | 29             | 32.3                  | 350    | 38452 | 5.1  | Hypothetical protein DKFZp564N1778                                                                          |
| 608 | Q9UHQ9           | 9                    | 22             | 29.8                  | 305    | 34095 | 9.4  | NADH-cytochrome b5 reductase isoform                                                                        |
| 609 | P20042           | 9                    | 30             | 29.1                  | 333    | 38388 | 5.8  | Eukaryotic translation initiation factor 2 subunit 2                                                        |
| 610 | Q7Z7N7           | 9                    | 101            | 28.8                  | 361    | 39959 | 9.4  | Solute carrier family 25 (Mitochondrial carrier; phosphate carrier), member 3                               |
| 610 | Q8NCF7           | 9                    | 101            | 28.8                  | 361    | 39933 | 9.4  | CDNA FLJ90278 fis, clone NT2RP1000325, highly similar to Phosphate carrier protein, mitochondrial precursor |
| 611 | O00505           | 9                    | 18             | 28.6                  | 521    | 57811 | 4.9  | Importin alpha-3 subunit                                                                                    |
| 612 | P10644           | 9                    | 12             | 28.1                  | 381    | 42982 | 5.3  | cAMP-dependent protein kinase type I-alpha regulatory subunit                                               |
| 612 | Q68DQ4           | 9                    | 12             | 28.1                  | 381    | 42948 | 5.3  | Hypothetical protein DKFZp779L0468                                                                          |
| 613 | Q15942           | 9                    | 77             | 28.1                  | 572    | 61277 | 6.7  | Zyxin                                                                                                       |



| No. | Accession Number | Unique Peptide Count | Spectrum Count | Sequence Coverage (%) | Length | MolWt | pI   | Descriptive Name                                                                                                                                                                         |
|-----|------------------|----------------------|----------------|-----------------------|--------|-------|------|------------------------------------------------------------------------------------------------------------------------------------------------------------------------------------------|
| 614 | Q32Q68           | 9                    | 45             | 26.1                  | 272    | 30629 | 6    | Capping protein (Actin filament) muscle Z-line, beta                                                                                                                                     |
| 614 | Q5VVZ5           | 9                    | 45             | 23.6                  | 301    | 33781 | 6.4  | Capping protein (Actin filament) muscle Z-line, beta                                                                                                                                     |
| 615 | Q8NB01           | 9                    | 24             | 26.8                  | 388    | 44997 | 5.5  | CDNA FLJ34453 fis, clone HLUNG2002429, highly similar to Homo sapiens cartilage-associated protein                                                                                       |
| 615 | O75718           | 9                    | 24             | 25.9                  | 401    | 46562 | 5.7  | Cartilage-associated protein precursor                                                                                                                                                   |
| 615 | UPI0000D61AEC    | 9                    | 24             | 25.7                  | 404    | 46847 | 5.7  | Cartilage-associated protein precursor.                                                                                                                                                  |
| 616 | Q9NR12           | 9                    | 14             | 25.6                  | 457    | 49845 | 8.4  | PDZ and LIM domain protein 7                                                                                                                                                             |
| 617 | Q0IJ47           | 9                    | 64             | 25.5                  | 467    | 48086 | 4.9  | KRT9 protein                                                                                                                                                                             |
| 618 | Q5QPL9           | 9                    | 64             | 32.5                  | 237    | 24665 | 10.5 | RNA binding protein, autoantigenic (HnRNP-associated with lethal yellow homolog (Mouse))                                                                                                 |
| 618 | Q9UKM9-2         | 9                    | 64             | 26.6                  | 290    | 30364 | 9.6  | Isoform 1 of Q9UKM9                                                                                                                                                                      |
| 618 | Q9UKM9           | 9                    | 64             | 25.2                  | 306    | 32463 | 9.2  | RNA-binding protein Raly                                                                                                                                                                 |
| 618 | Q53GL6           | 9                    | 64             | 25.1                  | 307    | 32550 | 9.2  | RNA binding protein (Autoantigenic, hnRNP-associated with lethal yellow) long isoform variant (RNA binding protein, autoantigenic) (HnRNP-associated with lethal yellow homolog (Mouse)) |
| 619 | UPI000045648D    | 9                    | 24             | 25.1                  | 371    | 42252 | 6.3  | Alpha-parvin (Calponin-like integrin-linked kinase-binding protein) (CH-ILKBP) (Matrix-remodelling-associated protein 2).                                                                |
| 619 | Q9NVD7           | 9                    | 24             | 25                    | 372    | 42244 | 5.9  | Alpha-parvin                                                                                                                                                                             |
| 620 | A0PJ92           | 9                    | 50             | 24.8                  | 447    | 49757 | 9.1  | Hypothetical protein                                                                                                                                                                     |
| 620 | O00567           | 9                    | 50             | 18.7                  | 594    | 66050 | 9.2  | Nucleolar protein Nop56                                                                                                                                                                  |
| 621 | P52292           | 9                    | 30             | 23.8                  | 529    | 57862 | 5.4  | Importin alpha-2 subunit                                                                                                                                                                 |
| 621 | Q6NVW7           | 9                    | 30             | 23.8                  | 529    | 57965 | 5.4  | Karyopherin alpha 2                                                                                                                                                                      |
| 621 | Q53YE3           | 9                    | 30             | 23.8                  | 529    | 57876 | 5.3  | Karyopherin alpha 2                                                                                                                                                                      |
| 622 | Q59GY3           | 9                    | 92             | 29.4                  | 279    | 31865 | 11   | Arginine/serine-rich splicing factor 6 variant                                                                                                                                           |
| 622 | Q13247-3         | 9                    | 92             | 24.5                  | 335    | 38419 | 11   | Isoform SRP55                                                                                                                                                                            |
| 622 | Q13247           | 9                    | 92             | 23.8                  | 344    | 39587 | 11.4 | Splicing factor, arginine/serine-rich 6                                                                                                                                                  |
| 623 | P30520           | 9                    | 20             | 23.5                  | 456    | 50097 | 6.6  | Adenylosuccinate synthetase isozyme 2                                                                                                                                                    |
| 624 | P51114-3         | 9                    | 30             | 26.7                  | 536    | 59919 | 6.9  | Isoform 3 of P51114                                                                                                                                                                      |
| 624 | P51114           | 9                    | 30             | 23                    | 621    | 69692 | 6.3  | Fragile X mental retardation syndrome-related protein 1                                                                                                                                  |
| 624 | UPI000013EA6E    | 9                    | 30             | 23                    | 621    | 69721 | 6.2  | fragile X mental retardation-related protein 1 isoform a                                                                                                                                 |
| 625 | Q13409-4         | 9                    | 28             | 23.6                  | 605    | 67552 | 5.1  | Isoform 2D of Q13409                                                                                                                                                                     |
| 625 | UPI0000D61269    | 9                    | 28             | 23.5                  | 608    | 67805 | 5.2  | Cytoplasmic dynein 1 intermediate chain 2 (Dynein intermediate chain 2, cytosolic) (DH IC-2) (Cytoplasmic dynein intermediate chain 2).                                                  |
| 625 | Q7Z4X1           | 9                    | 28             | 23.4                  | 612    | 68354 | 5.3  | Cytoplasmic dynein intermediate chain 2C                                                                                                                                                 |
| 625 | Q5BJF8           | 9                    | 28             | 23.4                  | 612    | 68426 | 5.3  | DYNC112 protein                                                                                                                                                                          |
| 625 | Q13409-6         | 9                    | 28             | 23.4                  | 611    | 68298 | 5.3  | Isoform 2F of Q13409                                                                                                                                                                     |
| 625 | Q13409-2         | 9                    | 28             | 22.6                  | 632    | 70645 | 5.2  | Isoform 2B of Q13409                                                                                                                                                                     |
| 625 | Q13409           | 9                    | 28             | 22.4                  | 638    | 71457 | 5.2  | Cytoplasmic dynein 1 intermediate chain 2                                                                                                                                                |
| 625 | Q13409-5         | 9                    | 28             | 22.4                  | 637    | 71328 | 5.2  | Isoform 2E of Q13409                                                                                                                                                                     |

| No. | Accession Number | Unique Peptide Count | Spectrum Count | Sequence Coverage (%) | Length | MolWt  | pI  | Descriptive Name                                                                                                                                                                                        |
|-----|------------------|----------------------|----------------|-----------------------|--------|--------|-----|---------------------------------------------------------------------------------------------------------------------------------------------------------------------------------------------------------|
| 625 | UPI0000456EA1    | 9                    | 28             | 22.3                  | 641    | 71709  | 5.2 | Cytoplasmic dynein 1 intermediate chain 2 (Dynein intermediate chain 2, cytosolic) (DH IC-2) (Cytoplasmic dynein intermediate chain 2).                                                                 |
| 626 | UPI0000378489    | 9                    | 66             | 22.5                  | 525    | 59178  | 4.4 | protein kinase C substrate 80K-H isoform 2                                                                                                                                                              |
| 626 | P14314           | 9                    | 66             | 22.3                  | 528    | 59425  | 4.4 | Glucosidase 2 subunit beta precursor                                                                                                                                                                    |
| 627 | Q9Y3I0           | 9                    | 21             | 22                    | 505    | 55210  | 7.2 | UPF0027 protein C22orf28                                                                                                                                                                                |
| 628 | P07099           | 9                    | 27             | 21.1                  | 455    | 52949  | 7.3 | Epoxide hydrolase 1                                                                                                                                                                                     |
| 629 | O75131           | 9                    | 23             | 20.9                  | 537    | 60131  | 5.8 | Copine-3                                                                                                                                                                                                |
| 630 | Q99829           | 9                    | 26             | 20.9                  | 537    | 59059  | 5.8 | Copine-1                                                                                                                                                                                                |
| 631 | Q15758           | 9                    | 96             | 20.5                  | 541    | 56598  | 5.5 | Neutral amino acid transporter B(0) (ATB(0))                                                                                                                                                            |
| 631 | Q71UA6           | 9                    | 96             | 20.5                  | 541    | 56583  | 5.5 | Neutral amino acid transporter                                                                                                                                                                          |
| 632 | Q86UX7-2         | 9                    | 30             | 20.7                  | 663    | 75430  | 6.8 | Isoform 2 of Q86UX7                                                                                                                                                                                     |
| 632 | Q86UX7           | 9                    | 30             | 20.5                  | 667    | 75953  | 7   | Unc-112-related protein 2                                                                                                                                                                               |
| 633 | P13674           | 9                    | 22             | 20.2                  | 534    | 61049  | 6   | Prolyl 4-hydroxylase subunit alpha-1 precursor                                                                                                                                                          |
| 633 | Q5VVSQ6          | 9                    | 22             | 20.2                  | 534    | 60967  | 6   | Procollagen-proline, 2-oxoglutarate 4-dioxygenase (Proline 4-hydroxylase), alpha polypeptide I (Procollagen-proline, 2-oxoglutarate 4-dioxygenase (Proline 4-hydroxylase), alpha polypeptide I variant) |
| 634 | O75390           | 9                    | 28             | 19.7                  | 466    | 51712  | 8.3 | Citrate synthase, mitochondrial precursor                                                                                                                                                               |
| 635 | Q2T9F7           | 9                    | 34             | 18.2                  | 713    | 79612  | 6.8 | UNC84B protein                                                                                                                                                                                          |
| 635 | Q9UH99           | 9                    | 34             | 18.1                  | 717    | 80311  | 6.7 | Sad1/unc-84-like protein 2                                                                                                                                                                              |
| 635 | Q504T5           | 9                    | 34             | 17.6                  | 738    | 82575  | 6.6 | UNC84B protein                                                                                                                                                                                          |
| 636 | P49321           | 9                    | 26             | 17.8                  | 788    | 85238  | 4.3 | Nuclear autoantigenic sperm protein                                                                                                                                                                     |
| 637 | Q14247           | 9                    | 41             | 17.1                  | 550    | 61636  | 5.4 | Src substrate cortactin                                                                                                                                                                                 |
| 637 | UPI0000D62647    | 9                    | 41             | 17.1                  | 551    | 61762  | 5.4 | Src substrate cortactin (Amplixin) (Oncogene EMS1).                                                                                                                                                     |
| 637 | UPI000013D657    | 9                    | 41             | 17.1                  | 550    | 61586  | 5.4 | cortactin isoform a                                                                                                                                                                                     |
| 637 | Q53HG7           | 9                    | 41             | 17.1                  | 550    | 61558  | 5.4 | Cortactin isoform a variant                                                                                                                                                                             |
| 638 | O95831-3         | 9                    | 25             | 16.6                  | 609    | 66295  | 8.9 | Isoform 3 of O95831                                                                                                                                                                                     |
| 638 | O95831           | 9                    | 25             | 16.5                  | 613    | 66901  | 9   | Apoptosis-inducing factor 1, mitochondrial precursor                                                                                                                                                    |
| 639 | Q96TA1           | 9                    | 18             | 16.8                  | 733    | 82683  | 6.2 | Niban-like protein                                                                                                                                                                                      |
| 639 | Q5VVW7           | 9                    | 18             | 16.5                  | 746    | 84138  | 6.2 | Chromosome 9 open reading frame 88                                                                                                                                                                      |
| 640 | P18084           | 9                    | 38             | 16.4                  | 799    | 88054  | 6.1 | Integrin beta-5 precursor                                                                                                                                                                               |
| 640 | UPI0000DD7BBB    | 9                    | 38             | 13.7                  | 958    | 104706 | 7.3 | PREDICTED: similar to Integrin beta-5 precursor                                                                                                                                                         |
| 641 | Q6GMQ6           | 9                    | 31             | 17.4                  | 610    | 66393  | 8.8 | Phosphatidylinositol binding clathrin assembly protein                                                                                                                                                  |
| 641 | Q13492-2         | 9                    | 31             | 16.8                  | 632    | 68764  | 7.9 | Isoform 2 of Q13492                                                                                                                                                                                     |
| 641 | Q13492           | 9                    | 31             | 16.3                  | 652    | 70755  | 7.9 | Phosphatidylinositol-binding clathrin assembly protein                                                                                                                                                  |
| 641 | Q4LE54           | 9                    | 31             | 14.7                  | 721    | 77397  | 8.4 | PICALM variant protein                                                                                                                                                                                  |
| 642 | Q9BR63           | 9                    | 46             | 16.1                  | 585    | 65701  | 6.8 | FARSB protein                                                                                                                                                                                           |
| 642 | UPI00002096AC    | 9                    | 46             | 16                    | 589    | 66116  | 6.8 | phenylalanyl-tRNA synthetase, beta subunit                                                                                                                                                              |
| 642 | Q9NSD9           | 9                    | 46             | 16                    | 589    | 66130  | 6.8 | Phenylalanyl-tRNA synthetase beta chain                                                                                                                                                                 |
| 643 | Q6IMN7           | 9                    | 58             | 16                    | 694    | 76862  | 5.1 | Cytoplasmic activation/proliferation-associated protein 1                                                                                                                                               |

| No. | Accession Number | Unique Peptide Count | Spectrum Count | Sequence Coverage (%) | Length | MolWt  | pI  | Descriptive Name                                                                                                                                                                                              |
|-----|------------------|----------------------|----------------|-----------------------|--------|--------|-----|---------------------------------------------------------------------------------------------------------------------------------------------------------------------------------------------------------------|
| 643 | Q9BV09           | 9                    | 58             | 15.7                  | 709    | 78366  | 5.2 | GPI-anchored membrane protein 1                                                                                                                                                                               |
| 643 | UPI0000366799    | 9                    | 58             | 15.6                  | 712    | 78612  | 5.2 | GPI-anchored membrane protein 1 (GPI-anchored protein p137) (p137GPI) (Membrane component chromosome 11 surface marker 1).                                                                                    |
| 644 | Q75MP2           | 9                    | 28             | 19.1                  | 591    | 66914  | 6.4 | Hypothetical protein PDE1C                                                                                                                                                                                    |
| 644 | Q8TAE4           | 9                    | 28             | 17.8                  | 634    | 72226  | 6.6 | PDE1C protein                                                                                                                                                                                                 |
| 644 | Q14123-2         | 9                    | 28             | 17.8                  | 634    | 72208  | 6.6 | Isoform PDE1C1 of Q14123                                                                                                                                                                                      |
| 644 | Q14123           | 9                    | 28             | 15.9                  | 709    | 80760  | 8.8 | Calcium/calmodulin-dependent 3',5'-cyclic nucleotide phosphodiesterase 1C                                                                                                                                     |
| 644 | UPI000045753D    | 9                    | 28             | 14.7                  | 769    | 86915  | 8.6 | Calcium/calmodulin-dependent 3',5'-cyclic nucleotide phosphodiesterase 1C (EC 3.1.4.17) (Cam-PDE 1C) (hCam-3).                                                                                                |
| 644 | Q8NB10           | 9                    | 28             | 14.7                  | 769    | 86910  | 8.5 | CDNA FLJ34415 fis, clone HEART2004764, highly similar to CALCIUM/CALMODULIN-DEPENDENT 3',5'-CYCLIC NUCLEOTIDE PHOSPHODIESTERASE 1C                                                                            |
| 645 | Q96PK6           | 9                    | 29             | 15.7                  | 669    | 69492  | 9.7 | RNA-binding protein 14                                                                                                                                                                                        |
| 646 | P08582           | 9                    | 26             | 14.9                  | 738    | 80242  | 6   | Melanotransferrin precursor                                                                                                                                                                                   |
| 646 | UPI000013E329    | 9                    | 26             | 14.9                  | 738    | 80215  | 5.9 | melanoma-associated antigen p97 isoform 1, precursor                                                                                                                                                          |
| 647 | Q16643           | 9                    | 27             | 14.9                  | 649    | 71425  | 4.5 | Drebrin                                                                                                                                                                                                       |
| 647 | UPI0000457394    | 9                    | 27             | 14.9                  | 649    | 71429  | 4.5 | Drebrin (Developmentally-regulated brain protein).                                                                                                                                                            |
| 647 | UPI000013E0B5    | 9                    | 27             | 14.9                  | 649    | 71439  | 4.5 | drebrin 1 isoform a                                                                                                                                                                                           |
| 648 | Q92973           | 9                    | 42             | 14.7                  | 890    | 101310 | 5   | Transportin-1                                                                                                                                                                                                 |
| 648 | UPI000020CAB6    | 9                    | 42             | 14.6                  | 898    | 102355 | 5   | transportin 1 isoform 1                                                                                                                                                                                       |
| 649 | P23921           | 9                    | 18             | 14.4                  | 792    | 90070  | 7.1 | Ribonucleoside-diphosphate reductase large subunit                                                                                                                                                            |
| 649 | Q53GZ5           | 9                    | 18             | 14.4                  | 792    | 89972  | 7.3 | Ribonucleoside-diphosphate reductase M1 chain variant                                                                                                                                                         |
| 650 | O00541-2         | 9                    | 35             | 14.2                  | 583    | 67456  | 7.5 | Isoform 2 of O00541                                                                                                                                                                                           |
| 650 | O00541           | 9                    | 35             | 14.1                  | 588    | 68003  | 7.3 | Pescadillo homolog 1                                                                                                                                                                                          |
| 651 | Q32P28           | 9                    | 44             | 12.6                  | 736    | 83394  | 5.1 | Prolyl 3-hydroxylase 1 precursor                                                                                                                                                                              |
| 652 | Q8NE71           | 9                    | 30             | 12.4                  | 845    | 95926  | 6.8 | ATP-binding cassette sub-family F member 1                                                                                                                                                                    |
| 653 | Q9NZB2-3         | 9                    | 15             | 11.3                  | 1118   | 121888 | 8.9 | Isoform C of Q9NZB2                                                                                                                                                                                           |
| 654 | Q9P2B2           | 9                    | 21             | 10.9                  | 879    | 98556  | 6.6 | Prostaglandin F2 receptor negative regulator precursor                                                                                                                                                        |
| 655 | P52732           | 9                    | 21             | 10.4                  | 1056   | 119159 | 5.6 | Kinesin-like protein KIF11                                                                                                                                                                                    |
| 656 | UPI0000456910    | 9                    | 19             | 10.3                  | 1102   | 128316 | 5.6 | Ubiquitin carboxyl-terminal hydrolase 7 (EC 3.1.2.15) (Ubiquitin thioesterase 7) (Ubiquitin-specific-processing protease 7) (Deubiquitinating enzyme 7) (Herpesvirus-associated ubiquitin-specific protease). |

| No. | Accession Number | Unique Peptide Count | Spectrum Count | Sequence Coverage (%) | Length | MolWt  | pI  | Descriptive Name                                                                                                                                                                                              |
|-----|------------------|----------------------|----------------|-----------------------|--------|--------|-----|---------------------------------------------------------------------------------------------------------------------------------------------------------------------------------------------------------------|
| 656 | UPI000013F0BE    | 9                    | 19             | 10.3                  | 1102   | 128302 | 5.6 | Ubiquitin carboxyl-terminal hydrolase 7 (EC 3.1.2.15) (Ubiquitin thioesterase 7) (Ubiquitin-specific-processing protease 7) (Deubiquitinating enzyme 7) (Herpesvirus-associated ubiquitin-specific protease). |
| 656 | Q93009           | 9                    | 19             | 10.3                  | 1102   | 128272 | 5.6 | Ubiquitin carboxyl-terminal hydrolase 7                                                                                                                                                                       |
| 656 | Q6U8A4           | 9                    | 19             | 10.2                  | 1112   | 129004 | 5.8 | Ubiquitin-specific protease 7 isoform                                                                                                                                                                         |
| 656 | UPI0000D6198F    | 9                    | 19             | 10.2                  | 1110   | 128925 | 5.8 | Ubiquitin carboxyl-terminal hydrolase 7 (EC 3.1.2.15) (Ubiquitin thioesterase 7) (Ubiquitin-specific-processing protease 7) (Deubiquitinating enzyme 7) (Herpesvirus-associated ubiquitin-specific protease). |
| 657 | Q9H2G2-2         | 9                    | 22             | 10.3                  | 1204   | 138995 | 5.1 | Isoform 2 of Q9H2G2                                                                                                                                                                                           |
| 657 | Q9H2G2           | 9                    | 22             | 10                    | 1235   | 142695 | 5.1 | STE20-like serine/threonine-protein kinase                                                                                                                                                                    |
| 658 | O00203           | 9                    | 21             | 9.9                   | 1094   | 121350 | 6   | AP-3 complex subunit beta-1                                                                                                                                                                                   |
| 658 | UPI00001AE77D    | 9                    | 21             | 9.9                   | 1094   | 121320 | 6   | adaptor-related protein complex 3, beta 1 subunit                                                                                                                                                             |
| 659 | Q92878           | 9                    | 18             | 9.2                   | 1312   | 153892 | 6.9 | DNA repair protein RAD50                                                                                                                                                                                      |
| 659 | UPI000045733E    | 9                    | 18             | 9.2                   | 1311   | 153750 | 6.9 | DNA repair protein RAD50 (EC 3.6.-.-) (hRAD50).                                                                                                                                                               |
| 659 | Q92878-2         | 9                    | 18             | 9.2                   | 1318   | 154587 | 6.9 | Isoform 2 of Q92878                                                                                                                                                                                           |
| 660 | Q5TBK6           | 9                    | 22             | 8.5                   | 1349   | 153670 | 7.8 | LIM domain 7                                                                                                                                                                                                  |
| 660 | Q8WWI1-3         | 9                    | 22             | 8.5                   | 1349   | 153684 | 7.8 | Isoform 3 of Q8WWI1                                                                                                                                                                                           |
| 660 | UPI0000456709    | 9                    | 22             | 7.1                   | 1614   | 185153 | 8   | LIM domain only protein 7 (LOMP) (F-box only protein 20).                                                                                                                                                     |
| 660 | Q8WWI1-4         | 9                    | 22             | 7.1                   | 1614   | 185229 | 8   | Isoform 4 of Q8WWI1                                                                                                                                                                                           |
| 660 | UPI0000456708    | 9                    | 22             | 6.9                   | 1670   | 190813 | 7   | LIM domain only protein 7 (LOMP) (F-box only protein 20).                                                                                                                                                     |
| 660 | Q8WWI1-2         | 9                    | 22             | 6.9                   | 1670   | 190889 | 7   | Isoform 2 of Q8WWI1                                                                                                                                                                                           |
| 660 | UPI0000456707    | 9                    | 22             | 6.8                   | 1683   | 192754 | 8.1 | LIM domain only protein 7 (LOMP) (F-box only protein 20).                                                                                                                                                     |
| 660 | Q8WWI1           | 9                    | 22             | 6.8                   | 1683   | 192708 | 8.1 | LIM domain only protein 7                                                                                                                                                                                     |
| 661 | Q9UBG0           | 9                    | 24             | 7.8                   | 1479   | 166655 | 5.8 | Macrophage mannose receptor 2 precursor                                                                                                                                                                       |
| 661 | UPI000013E895    | 9                    | 24             | 7.8                   | 1479   | 166674 | 5.8 | mannose receptor, C type 2                                                                                                                                                                                    |
| 662 | Q9C0C2           | 9                    | 22             | 6.5                   | 1729   | 181780 | 4.9 | 182 kDa tankyrase 1-binding protein                                                                                                                                                                           |
| 662 | UPI000013DB72    | 9                    | 22             | 6.5                   | 1729   | 181795 | 4.9 | tankyrase 1-binding protein 1                                                                                                                                                                                 |
| 663 | Q9Y5S2           | 9                    | 10             | 6.1                   | 1711   | 194314 | 6.4 | Serine/threonine-protein kinase MRCK beta                                                                                                                                                                     |
| 664 | Q14669           | 9                    | 31             | 6                     | 1992   | 220432 | 8.5 | Probable E3 ubiquitin-protein ligase TRIP12                                                                                                                                                                   |
| 664 | UPI0000456F1C    | 9                    | 31             | 6                     | 1991   | 220245 | 8.5 | Thyroid receptor-interacting protein 12 (TRIP12).                                                                                                                                                             |
| 664 | Q14CA3           | 9                    | 31             | 5.8                   | 2040   | 225518 | 8.7 | TRIP12 protein                                                                                                                                                                                                |
| 665 | Q149P0           | 9                    | 22             | 5.1                   | 1855   | 206015 | 5.8 | GBF1 protein                                                                                                                                                                                                  |
| 665 | Q92538           | 9                    | 22             | 5.1                   | 1859   | 206444 | 5.7 | Golgi-specific brefeldin A-resistance guanine nucleotide exchange factor 1                                                                                                                                    |

| No. | Accession Number | Unique Peptide Count | Spectrum Count | Sequence Coverage (%) | Length | MolWt  | pI   | Descriptive Name                                                                                                                                      |
|-----|------------------|----------------------|----------------|-----------------------|--------|--------|------|-------------------------------------------------------------------------------------------------------------------------------------------------------|
| 666 | UPI0000D62536    | 9                    | 23             | 5.6                   | 2142   | 232541 | 6    | SON protein (SON3) (Negative regulatory element-binding protein) (NRE- binding protein) (DBP-5) (Bax antagonist selected in saccharomyces 1) (BASS1). |
| 666 | P18583-2         | 9                    | 23             | 5.6                   | 2140   | 232322 | 6    | Isoform A of P18583                                                                                                                                   |
| 666 | P18583-10        | 9                    | 23             | 5.3                   | 2282   | 247836 | 5.4  | Isoform J of P18583                                                                                                                                   |
| 666 | UPI0000140BF6    | 9                    | 23             | 5.2                   | 2325   | 252251 | 5.4  | SON protein (SON3) (Negative regulatory element-binding protein) (NRE- binding protein) (DBP-5) (Bax antagonist selected in saccharomyces 1) (BASS1). |
| 666 | UPI000013E646    | 9                    | 23             | 5.2                   | 2303   | 250386 | 5.6  | SON DNA-binding protein isoform B                                                                                                                     |
| 666 | P18583-4         | 9                    | 23             | 5.2                   | 2325   | 252267 | 5.4  | Isoform C of P18583                                                                                                                                   |
| 666 | P18583-3         | 9                    | 23             | 5.2                   | 2303   | 250402 | 5.6  | Isoform B of P18583                                                                                                                                   |
| 666 | UPI0000D62537    | 9                    | 23             | 5                     | 2388   | 259821 | 5.7  | SON protein (SON3) (Negative regulatory element-binding protein) (NRE- binding protein) (DBP-5) (Bax antagonist selected in saccharomyces 1) (BASS1). |
| 666 | P18583-7         | 9                    | 23             | 5                     | 2386   | 259608 | 5.7  | Isoform G of P18583                                                                                                                                   |
| 666 | P18583           | 9                    | 23             | 4.9                   | 2426   | 263843 | 5.6  | SON protein                                                                                                                                           |
| 666 | UPI0000140BFD    | 9                    | 23             | 4.9                   | 2426   | 263827 | 5.6  | SON DNA-binding protein isoform F                                                                                                                     |
| 666 | P18583-9         | 9                    | 23             | 4.9                   | 2466   | 268106 | 5.6  | Isoform I of P18583                                                                                                                                   |
| 666 | P18583-5         | 9                    | 23             | 4.9                   | 2459   | 267048 | 5.7  | Isoform D of P18583                                                                                                                                   |
| 667 | Q07954           | 9                    | 17             | 2.3                   | 4544   | 504579 | 5.4  | Low-density lipoprotein receptor-related protein 1 precursor                                                                                          |
| 667 | UPI00001B044F    | 9                    | 17             | 2.3                   | 4544   | 504610 | 5.4  | low density lipoprotein-related protein 1                                                                                                             |
| 668 | Q9GZT3           | 8                    | 70             | 64.2                  | 109    | 12349  | 10.2 | SRA stem-loop-interacting RNA-binding protein, mitochondrial precursor                                                                                |
| 669 | P09382           | 8                    | 570            | 61.5                  | 135    | 14716  | 5.5  | Galectin-1                                                                                                                                            |
| 670 | Q96TD5           | 8                    | 31             | 57.2                  | 243    | 26349  | 4.7  | P27BBP protein                                                                                                                                        |
| 670 | P56537           | 8                    | 31             | 56.7                  | 245    | 26599  | 4.7  | Eukaryotic translation initiation factor 6 (eIF-6) (B4 integrin interactor) (CAB) (p27(BBP)) (B(2)GCN homolog)                                        |
| 671 | P51148           | 8                    | 103            | 54.2                  | 216    | 23483  | 8.4  | Ras-related protein Rab-5C                                                                                                                            |
| 672 | P61981           | 8                    | 128            | 53                    | 247    | 28303  | 4.9  | 14-3-3 protein gamma                                                                                                                                  |
| 673 | P19105           | 8                    | 92             | 50.9                  | 171    | 19794  | 4.8  | Myosin regulatory light chain 2, nonsarcomeric                                                                                                        |
| 673 | Q3THE2           | 8                    | 92             | 50.6                  | 172    | 19779  | 4.8  | Myosin regulatory light chain 2-B, smooth muscle isoform                                                                                              |
| 674 | P62807           | 8                    | 507            | 50.4                  | 125    | 13819  | 10.3 | Histone H2B type 1-C/E/F/G/I                                                                                                                          |
| 674 | A0AVI3           | 8                    | 507            | 50                    | 126    | 13916  | 10.3 | H2B histone family, member S                                                                                                                          |
| 674 | Q99880           | 8                    | 507            | 50                    | 126    | 13952  | 10.3 | Histone H2B type 1-L                                                                                                                                  |
| 674 | Q99879           | 8                    | 507            | 50                    | 126    | 13989  | 10.3 | Histone H2B type 1-M                                                                                                                                  |
| 674 | Q99877           | 8                    | 507            | 50                    | 126    | 13922  | 10.3 | Histone H2B type 1-N                                                                                                                                  |
| 674 | Q93079           | 8                    | 507            | 50                    | 126    | 13892  | 10.3 | Histone H2B type 1-H                                                                                                                                  |
| 674 | Q5QNW6           | 8                    | 507            | 50                    | 126    | 13920  | 10.3 | Histone H2B type 2-F                                                                                                                                  |
| 674 | P58876           | 8                    | 507            | 50                    | 126    | 13936  | 10.3 | Histone H2B type 1-D                                                                                                                                  |
| 674 | P57053           | 8                    | 507            | 50                    | 126    | 13944  | 10.4 | Histone H2B type F-S                                                                                                                                  |
| 674 | O60814           | 8                    | 507            | 50                    | 126    | 13890  | 10.3 | Histone H2B type 1-K                                                                                                                                  |
| 675 | P51153           | 8                    | 39             | 48.3                  | 203    | 22774  | 9.2  | Ras-related protein Rab-13                                                                                                                            |
| 676 | P63241           | 8                    | 65             | 48.1                  | 154    | 16832  | 5.2  | Eukaryotic translation initiation factor 5A-1                                                                                                         |
| 676 | P63241-2         | 8                    | 65             | 40.2                  | 184    | 20170  | 7    | Isoform 2 of P63241                                                                                                                                   |

| No. | Accession Number | Unique Peptide Count | Spectrum Count | Sequence Coverage (%) | Length | MolWt | pI   | Descriptive Name                                                                                                                                                              |
|-----|------------------|----------------------|----------------|-----------------------|--------|-------|------|-------------------------------------------------------------------------------------------------------------------------------------------------------------------------------|
| 677 | Q9Y3B7           | 8                    | 19             | 47.9                  | 192    | 20683 | 9.9  | 39S ribosomal protein L11, mitochondrial precursor                                                                                                                            |
| 678 | P20340-2         | 8                    | 58             | 47.1                  | 208    | 23549 | 5.5  | Isoform 2 of P20340                                                                                                                                                           |
| 678 | Q6FGX3           | 8                    | 58             | 47.1                  | 208    | 23550 | 5.4  | RAB6A protein                                                                                                                                                                 |
| 679 | P46783           | 8                    | 124            | 46.7                  | 165    | 18898 | 10.2 | 40S ribosomal protein S10                                                                                                                                                     |
| 680 | P61758           | 8                    | 47             | 45.7                  | 197    | 22658 | 7.1  | Prefoldin subunit 3                                                                                                                                                           |
| 681 | P61224           | 8                    | 86             | 45.1                  | 184    | 20825 | 5.8  | Ras-related protein Rap-1b precursor                                                                                                                                          |
| 682 | UPI00004075C6    | 8                    | 33             | 50.2                  | 253    | 28226 | 6.8  | S-formylglutathione hydrolase (EC 3.1.2.12) (FGH) (Esterase D).                                                                                                               |
| 682 | P10768           | 8                    | 33             | 45                    | 282    | 31463 | 7    | S-formylglutathione hydrolase                                                                                                                                                 |
| 683 | P35270           | 8                    | 34             | 44.1                  | 261    | 28048 | 8    | Sepiapterin reductase                                                                                                                                                         |
| 684 | P29966           | 8                    | 38             | 43.7                  | 332    | 31555 | 4.4  | Myristoylated alanine-rich C-kinase substrate                                                                                                                                 |
| 685 | P47755           | 8                    | 33             | 43.7                  | 286    | 32949 | 5.8  | F-actin capping protein subunit alpha-2                                                                                                                                       |
| 685 | Q53GC7           | 8                    | 33             | 43.7                  | 286    | 32967 | 5.8  | Capping protein (Actin filament) muscle Z-line, alpha 2 variant                                                                                                               |
| 686 | P00492           | 8                    | 43             | 43.6                  | 218    | 24579 | 6.7  | Hypoxanthine-guanine phosphoribosyltransferase                                                                                                                                |
| 686 | Q6LET3           | 8                    | 43             | 43.6                  | 218    | 24588 | 6.8  | HPRT1 protein                                                                                                                                                                 |
| 687 | P61586           | 8                    | 72             | 43.5                  | 193    | 21768 | 6.1  | Transforming protein RhoA precursor                                                                                                                                           |
| 688 | Q15286           | 8                    | 43             | 43.3                  | 201    | 23025 | 8.3  | Ras-related protein Rab-35                                                                                                                                                    |
| 688 | UPI0000456691    | 8                    | 43             | 43.3                  | 201    | 23053 | 8    | Ras-related protein Rab-35 (Rab-1C) (GTP-binding protein RAY).                                                                                                                |
| 689 | P21964-2         | 8                    | 51             | 52                    | 221    | 24449 | 5.3  | Isoform Soluble of P21964                                                                                                                                                     |
| 689 | P21964           | 8                    | 51             | 42.4                  | 271    | 30037 | 5.5  | Catechol O-methyltransferase                                                                                                                                                  |
| 689 | Q6ICE6           | 8                    | 51             | 42.4                  | 271    | 30069 | 5.5  | COMT protein                                                                                                                                                                  |
| 690 | P04179           | 8                    | 43             | 42.3                  | 222    | 24722 | 8.3  | Superoxide dismutase [Mn], mitochondrial precursor                                                                                                                            |
| 690 | UPI000006D275    | 8                    | 43             | 42.3                  | 222    | 24750 | 8.3  | manganese superoxide dismutase isoform A precursor                                                                                                                            |
| 691 | Q99653           | 8                    | 34             | 42.1                  | 195    | 22456 | 5.1  | Calcium-binding protein p22                                                                                                                                                   |
| 692 | P62917           | 8                    | 132            | 42                    | 257    | 28025 | 11   | 60S ribosomal protein L8                                                                                                                                                      |
| 693 | O95816           | 8                    | 37             | 41.7                  | 211    | 23772 | 6.7  | BAG family molecular chaperone regulator 2                                                                                                                                    |
| 694 | UPI00002263A8    | 8                    | 57             | 44.8                  | 183    | 20345 | 5.3  | sorcin isoform b                                                                                                                                                              |
| 694 | P30626           | 8                    | 57             | 41.4                  | 198    | 21676 | 5.6  | Sorcin                                                                                                                                                                        |
| 695 | Q86V81           | 8                    | 36             | 40.5                  | 257    | 26888 | 11.2 | THO complex subunit 4                                                                                                                                                         |
| 696 | Q9BVK6           | 8                    | 73             | 40.2                  | 214    | 25105 | 7.2  | Transmembrane emp24 domain-containing protein 9 precursor                                                                                                                     |
| 696 | UPI00001D6EC0    | 8                    | 73             | 36.6                  | 235    | 27277 | 8    | transmembrane emp24 protein transport domain containing 9                                                                                                                     |
| 697 | P37235           | 8                    | 57             | 39.9                  | 193    | 22313 | 5.4  | Hippocalcin-like protein 1                                                                                                                                                    |
| 698 | Q9Y2Q3           | 8                    | 41             | 39.8                  | 226    | 25497 | 8.4  | Glutathione S-transferase kappa 1                                                                                                                                             |
| 699 | O43809           | 8                    | 43             | 39.6                  | 227    | 26227 | 8.8  | Cleavage and polyadenylation specificity factor 5                                                                                                                             |
| 700 | P47985           | 8                    | 68             | 39.4                  | 274    | 29668 | 8.3  | Ubiquinol-cytochrome c reductase iron-sulfur subunit, mitochondrial precursor                                                                                                 |
| 701 | Q13185           | 8                    | 54             | 39.3                  | 183    | 20811 | 5.3  | Chromobox protein homolog 3                                                                                                                                                   |
| 702 | UPI0000456411    | 8                    | 69             | 40.8                  | 238    | 25889 | 7.8  | Thioredoxin-dependent peroxide reductase, mitochondrial precursor (EC 1.11.1.15) (Peroxiredoxin-3) (PRX III) (Antioxidant protein 1) (AOP-1) (Protein MER5 homolog) (HBC189). |

| No. | Accession Number | Unique Peptide Count | Spectrum Count | Sequence Coverage (%) | Length | MolWt | pI   | Descriptive Name                                                                                                                                                                                                                                                |
|-----|------------------|----------------------|----------------|-----------------------|--------|-------|------|-----------------------------------------------------------------------------------------------------------------------------------------------------------------------------------------------------------------------------------------------------------------|
| 702 | UPI00001B216B    | 8                    | 69             | 40.8                  | 238    | 25839 | 7.5  | peroxiredoxin 3 isoform b                                                                                                                                                                                                                                       |
| 702 | P30048           | 8                    | 69             | 37.9                  | 256    | 27693 | 7.8  | Thioredoxin-dependent peroxide reductase, mitochondrial precursor                                                                                                                                                                                               |
| 703 | Q9NX63           | 8                    | 78             | 37.9                  | 227    | 26152 | 8.3  | Coiled-coil-helix-coiled-coil-helix domain-containing protein 3                                                                                                                                                                                                 |
| 704 | Q9UBQ7           | 8                    | 30             | 39.3                  | 328    | 35668 | 7.4  | Glyoxylate reductase/hydroxypyruvate reductase                                                                                                                                                                                                                  |
| 704 | Q5M7Z5           | 8                    | 30             | 37.8                  | 341    | 36824 | 6.4  | GRHPR protein                                                                                                                                                                                                                                                   |
| 705 | P53004           | 8                    | 23             | 37.5                  | 296    | 33428 | 6.4  | Biliverdin reductase A precursor                                                                                                                                                                                                                                |
| 706 | P26373           | 8                    | 86             | 37.4                  | 211    | 24261 | 11.7 | 60S ribosomal protein L13                                                                                                                                                                                                                                       |
| 706 | Q6NZ55           | 8                    | 86             | 37.4                  | 211    | 24265 | 11.7 | Ribosomal protein L13                                                                                                                                                                                                                                           |
| 707 | P40261           | 8                    | 42             | 36                    | 264    | 29574 | 5.7  | Nicotinamide N-methyltransferase                                                                                                                                                                                                                                |
| 708 | Q99685           | 8                    | 25             | 36                    | 303    | 33261 | 7    | Monoglyceride lipase                                                                                                                                                                                                                                            |
| 708 | UPI0000D61B71    | 8                    | 25             | 34.8                  | 313    | 34305 | 6.7  | Monoglyceride lipase (EC 3.1.1.23) (MGL) (HU-K5) (Lysophospholipase homolog) (Lysophospholipase-like).                                                                                                                                                          |
| 709 | P52565           | 8                    | 43             | 35.3                  | 204    | 23207 | 5.1  | Rho GDP-dissociation inhibitor 1                                                                                                                                                                                                                                |
| 710 | P48556           | 8                    | 23             | 34.2                  | 257    | 30005 | 7.3  | 26S proteasome non-ATPase regulatory subunit 8                                                                                                                                                                                                                  |
| 710 | Q5U0B3           | 8                    | 23             | 34.2                  | 257    | 29922 | 7.3  | Proteasome (Prosome, macropain) 26S subunit, non-ATPase, 8                                                                                                                                                                                                      |
| 711 | Q5TAM6           | 8                    | 28             | 34.2                  | 333    | 37805 | 5.2  | SGT1, suppressor of G2 allele of SKP1                                                                                                                                                                                                                           |
| 711 | Q9Y2Z0           | 8                    | 28             | 31.2                  | 365    | 41024 | 5.2  | Suppressor of G2 allele of SKP1 homolog                                                                                                                                                                                                                         |
| 712 | UPI000049DDE7    | 8                    | 30             | 39.9                  | 208    | 23873 | 3.9  | Acidic leucine-rich nuclear phosphoprotein 32 family member A (Potent heat-stable protein phosphatase 2A inhibitor I1PP2A) (Acidic nuclear phosphoprotein pp32) (Leucine-rich acidic nuclear protein) (Lanp) (Putative HLA-DR-associated protein I) (PHAPI) (Ma |
| 712 | UPI000049DDE6    | 8                    | 30             | 33.6                  | 247    | 28325 | 4.1  | Acidic leucine-rich nuclear phosphoprotein 32 family member A (Potent heat-stable protein phosphatase 2A inhibitor I1PP2A) (Acidic nuclear phosphoprotein pp32) (Leucine-rich acidic nuclear protein) (Lanp) (Putative HLA-DR-associated protein I) (PHAPI) (Ma |
| 712 | P39687           | 8                    | 30             | 33.3                  | 249    | 28585 | 4.1  | Acidic leucine-rich nuclear phosphoprotein 32 family member A                                                                                                                                                                                                   |
| 712 | Q53FK4           | 8                    | 30             | 33.3                  | 249    | 28557 | 4.1  | Acidic (Leucine-rich) nuclear phosphoprotein 32 family, member A variant                                                                                                                                                                                        |
| 713 | P51665           | 8                    | 39             | 33.3                  | 324    | 37025 | 6.8  | 26S proteasome non-ATPase regulatory subunit 7                                                                                                                                                                                                                  |
| 714 | O00233           | 8                    | 22             | 32.3                  | 223    | 24654 | 7    | 26S proteasome non-ATPase regulatory subunit 9                                                                                                                                                                                                                  |

| No. | Accession Number | Unique Peptide Count | Spectrum Count | Sequence Coverage (%) | Length | MolWt | pI  | Descriptive Name                                                                                                                                                                                      |
|-----|------------------|----------------------|----------------|-----------------------|--------|-------|-----|-------------------------------------------------------------------------------------------------------------------------------------------------------------------------------------------------------|
| 714 | UPI000013D207    | 8                    | 22             | 32.3                  | 223    | 24682 | 7   | proteasome 26S non-ATPase subunit 9                                                                                                                                                                   |
| 715 | Q13501           | 8                    | 26             | 29.1                  | 440    | 47687 | 5.2 | Sequestosome-1                                                                                                                                                                                        |
| 715 | UPI0000D616D2    | 8                    | 26             | 29                    | 441    | 47822 | 5.4 | Sequestosome-1 (Phosphotyrosine independent ligand for the Lck SH2 domain of 62 kDa) (Ubiquitin-binding protein p62) (EBI3-associated protein of 60 kDa) (p60) (EBIAP).                               |
| 715 | UPI0000D616D1    | 8                    | 26             | 28.9                  | 443    | 47871 | 5.4 | Sequestosome-1 (Phosphotyrosine independent ligand for the Lck SH2 domain of 62 kDa) (Ubiquitin-binding protein p62) (EBI3-associated protein of 60 kDa) (p60) (EBIAP).                               |
| 716 | P36542           | 8                    | 34             | 28.9                  | 298    | 32996 | 9.2 | ATP synthase gamma chain, mitochondrial precursor                                                                                                                                                     |
| 717 | Q9Y295           | 8                    | 18             | 28.6                  | 367    | 40542 | 8.9 | Developmentally-regulated GTP-binding protein 1                                                                                                                                                       |
| 718 | P38919           | 8                    | 28             | 28.5                  | 411    | 46871 | 6.7 | Eukaryotic initiation factor 4A-III                                                                                                                                                                   |
| 719 | Q86UY0           | 8                    | 25             | 28.3                  | 360    | 40369 | 5.8 | TXNDC5 protein                                                                                                                                                                                        |
| 719 | Q8NBS9           | 8                    | 25             | 23.6                  | 432    | 47629 | 6   | Thioredoxin domain-containing protein 5 precursor                                                                                                                                                     |
| 720 | P23193           | 8                    | 21             | 27.6                  | 301    | 33970 | 8.4 | Transcription elongation factor A protein 1                                                                                                                                                           |
| 721 | Q13561           | 8                    | 13             | 26.4                  | 401    | 44231 | 5.2 | Dynactin subunit 2                                                                                                                                                                                    |
| 721 | UPI000045662F    | 8                    | 13             | 26.1                  | 406    | 44722 | 5.2 | Dynactin subunit 2 (Dynactin complex 50 kDa subunit) (50 kDa dynein-associated polypeptide) (p50 dynamitin) (DCTN-50).                                                                                |
| 721 | UPI000004EFD1    | 8                    | 13             | 26.1                  | 406    | 44820 | 5.2 | dynactin 2                                                                                                                                                                                            |
| 721 | Q53H88           | 8                    | 13             | 26.1                  | 406    | 44821 | 5.1 | Dynactin 2 variant                                                                                                                                                                                    |
| 722 | P43034           | 8                    | 15             | 25.6                  | 410    | 46638 | 7.4 | Platelet-activating factor acetylhydrolase IB subunit alpha                                                                                                                                           |
| 723 | O75874           | 8                    | 24             | 25.1                  | 414    | 46659 | 7   | Isocitrate dehydrogenase [NADP] cytoplasmic (EC 1.1.1.42) (Cytosolic NADP-isocitrate dehydrogenase) (Oxalosuccinate decarboxylase) (IDH) (NADP(+)-specific ICDH)                                      |
| 723 | Q7Z3V0           | 8                    | 24             | 25.1                  | 414    | 46527 | 7.2 | Hypothetical protein DKFZp686M0959                                                                                                                                                                    |
| 723 | Q6FIA4           | 8                    | 24             | 25.1                  | 414    | 46568 | 6.8 | IDH1 protein                                                                                                                                                                                          |
| 724 | P04181           | 8                    | 40             | 24.1                  | 439    | 48535 | 7   | Ornithine aminotransferase, mitochondrial precursor (EC 2.6.1.13) (Ornithine--oxo-acid aminotransferase) [Contains: Ornithine aminotransferase, hepatic form; Ornithine aminotransferase, renal form] |
| 725 | Q96S43           | 8                    | 56             | 41.4                  | 244    | 27191 | 8.6 | JKTBP1delta6                                                                                                                                                                                          |
| 725 | Q7KZ75           | 8                    | 56             | 33.6                  | 301    | 33589 | 7.3 | HnRNP JKTBP protein                                                                                                                                                                                   |
| 725 | O14979           | 8                    | 56             | 24                    | 420    | 46437 | 9.6 | Heterogeneous nuclear ribonucleoprotein D-like                                                                                                                                                        |
| 726 | Q07960           | 8                    | 22             | 23                    | 439    | 50436 | 6.3 | Rho GTPase-activating protein 1                                                                                                                                                                       |
| 727 | Q9Y383           | 8                    | 27             | 23                    | 392    | 46514 | 10  | Putative RNA-binding protein Luc7-like 2                                                                                                                                                              |



| No. | Accession Number | Unique Peptide Count | Spectrum Count | Sequence Coverage (%) | Length | MolWt | pI  | Descriptive Name                                                                                                                                                                                                                                                                                                                                                                                                                                |
|-----|------------------|----------------------|----------------|-----------------------|--------|-------|-----|-------------------------------------------------------------------------------------------------------------------------------------------------------------------------------------------------------------------------------------------------------------------------------------------------------------------------------------------------------------------------------------------------------------------------------------------------|
| 727 | UPI000013D41E    | 8                    | 27             | 22.4                  | 401    | 47506 | 10  | Putative RNA-binding protein Luc7-like 2.                                                                                                                                                                                                                                                                                                                                                                                                       |
| 728 | Q13217           | 8                    | 16             | 22.8                  | 504    | 57580 | 6.2 | DnaJ homolog subfamily C member 3                                                                                                                                                                                                                                                                                                                                                                                                               |
| 729 | O15355           | 8                    | 45             | 21.6                  | 546    | 59272 | 4.4 | Protein phosphatase 2C isoform gamma                                                                                                                                                                                                                                                                                                                                                                                                            |
| 730 | P08559           | 8                    | 15             | 20.8                  | 390    | 43296 | 8.1 | Pyruvate dehydrogenase E1 component alpha subunit, somatic form, mitochondrial precursor                                                                                                                                                                                                                                                                                                                                                        |
| 731 | O95747           | 8                    | 15             | 20.3                  | 527    | 58022 | 6.4 | Serine/threonine-protein kinase OSR1                                                                                                                                                                                                                                                                                                                                                                                                            |
| 732 | Q96HE7           | 8                    | 20             | 20.3                  | 468    | 54393 | 5.7 | ERO1-like protein alpha precursor                                                                                                                                                                                                                                                                                                                                                                                                               |
| 733 | Q9HCJ6           | 8                    | 16             | 20                    | 419    | 45899 | 5.1 | Probable oxidoreductase KIAA1576                                                                                                                                                                                                                                                                                                                                                                                                                |
| 734 | O43175           | 8                    | 13             | 19.9                  | 533    | 56651 | 6.7 | D-3-phosphoglycerate dehydrogenase                                                                                                                                                                                                                                                                                                                                                                                                              |
| 735 | O95340           | 8                    | 12             | 19.5                  | 614    | 69501 | 8   | Bifunctional 3'-phosphoadenosine 5'-phosphosulfate synthetase 2 (PAPS synthetase 2) (PAPSS 2) (Sulfurylase kinase 2) (SK2) (SK 2) [Includes: Sulfate adenyltransferase (EC 2.7.7.4) (Sulfate adenylate transferase) (SAT) (ATP-sulfurylase); Adenylyl-sulfate kinase (EC 2.7.1.25) (Adenylylsulfate 3'-phosphotransferase) (APS kinase) (Adenosine-5'-phosphosulfate 3'-phosphotransferase) (3'-phosphoadenosine-5'-phosphosulfate synthetase)] |
| 735 | UPI000049DD01    | 8                    | 12             | 19.4                  | 619    | 70062 | 8.2 | Bifunctional 3'-phosphoadenosine 5'-phosphosulfate synthetase 2 (PAPS synthetase 2) (PAPSS 2) (Sulfurylase kinase 2) (SK2) (SK 2) [Includes: Sulfate adenyltransferase (EC 2.7.7.4) (Sulfate adenylate transferase) (SAT) (ATP-sulfurylase); Adenylyl-sulfate                                                                                                                                                                                   |
| 735 | O95340-2         | 8                    | 12             | 19.4                  | 619    | 69970 | 8   | Isoform B of O95340                                                                                                                                                                                                                                                                                                                                                                                                                             |
| 736 | Q9UHG3           | 8                    | 18             | 19.4                  | 505    | 56640 | 6.2 | Prenylcysteine oxidase precursor                                                                                                                                                                                                                                                                                                                                                                                                                |
| 736 | UPI000013D518    | 8                    | 18             | 19.4                  | 505    | 56700 | 6.2 | prenylcysteine oxidase 1                                                                                                                                                                                                                                                                                                                                                                                                                        |
| 737 | P61619-2         | 8                    | 89             | 21                    | 423    | 46045 | 7.3 | Isoform 2 of P61619                                                                                                                                                                                                                                                                                                                                                                                                                             |
| 737 | P61619           | 8                    | 89             | 18.7                  | 476    | 52265 | 8.1 | Protein transport protein Sec61 subunit alpha isoform 1                                                                                                                                                                                                                                                                                                                                                                                         |
| 738 | O95302           | 8                    | 21             | 18.2                  | 570    | 63084 | 5.1 | FK506-binding protein 9 precursor                                                                                                                                                                                                                                                                                                                                                                                                               |
| 739 | Q16222-2         | 8                    | 19             | 18.2                  | 505    | 57028 | 6.4 | Isoform AGX1 of Q16222                                                                                                                                                                                                                                                                                                                                                                                                                          |
| 739 | Q16222-3         | 8                    | 19             | 17.7                  | 521    | 58682 | 6.3 | Isoform 3 of Q16222                                                                                                                                                                                                                                                                                                                                                                                                                             |

| No. | Accession Number | Unique Peptide Count | Spectrum Count | Sequence Coverage (%) | Length | MolWt  | pI  | Descriptive Name                                                                                                                                                                                                                                                |
|-----|------------------|----------------------|----------------|-----------------------|--------|--------|-----|-----------------------------------------------------------------------------------------------------------------------------------------------------------------------------------------------------------------------------------------------------------------|
| 739 | Q16222           | 8                    | 19             | 17.6                  | 522    | 58769  | 6.3 | UDP-N-acetylhexosamine pyrophosphorylase (Antigen X) (AGX) (Sperm- associated antigen 2) [Includes: UDP-N-acetylgalactosamine pyrophosphorylase (EC 2.7.7.-) (AGX-1); UDP-N-acetylglucosamine pyrophosphorylase (EC 2.7.7.23) (AGX-2)]                          |
| 740 | P17812           | 8                    | 32             | 17.3                  | 591    | 66690  | 6.5 | CTP synthase 1                                                                                                                                                                                                                                                  |
| 741 | Q5SSJ5           | 8                    | 33             | 16.3                  | 553    | 61207  | 9.7 | Heterochromatin protein 1, binding protein 3                                                                                                                                                                                                                    |
| 741 | UPI0000D61E73    | 8                    | 33             | 16.2                  | 555    | 61434  | 9.7 | HP1-BP74                                                                                                                                                                                                                                                        |
| 742 | Q69YH4           | 8                    | 36             | 16.2                  | 622    | 70064  | 8.7 | Hypothetical protein DKFZp666E065                                                                                                                                                                                                                               |
| 742 | UPI00003FF926    | 8                    | 36             | 14.7                  | 689    | 77151  | 9.1 | hypothetical protein LOC54867 isoform 1                                                                                                                                                                                                                         |
| 743 | Q96JZ5           | 8                    | 47             | 16.1                  | 545    | 62941  | 7.5 | CDNA FLJ14882 fis, clone PLACE1003537, weakly similar to ENDOSOMAL P24A PROTEIN                                                                                                                                                                                 |
| 743 | UPI0000169B24    | 8                    | 47             | 14.9                  | 589    | 67870  | 7.2 | transmembrane 9 superfamily member 3                                                                                                                                                                                                                            |
| 743 | Q9HD45           | 8                    | 47             | 14.9                  | 589    | 67888  | 7.2 | Transmembrane 9 superfamily protein member 3 precursor                                                                                                                                                                                                          |
| 744 | UPI0000456CFE    | 8                    | 17             | 15.7                  | 955    | 105371 | 7.9 | AP-2 complex subunit alpha-1 (Adapter-related protein complex 2 alpha- 1 subunit) (Alpha-adaptin A) (Adaptor protein complex AP-2 alpha-1 subunit) (Clathrin assembly protein complex 2 alpha-A large chain) (100 kDa coated vesicle protein A) (Plasma membran |
| 744 | UPI0000037C08    | 8                    | 17             | 15.7                  | 955    | 105361 | 7.7 | adaptor-related protein complex 2, alpha 1 subunit isoform 2                                                                                                                                                                                                    |
| 744 | O95782-2         | 8                    | 17             | 15.7                  | 955    | 105370 | 7.7 | Isoform B of O95782                                                                                                                                                                                                                                             |
| 744 | O95782           | 8                    | 17             | 15.4                  | 977    | 107555 | 7.1 | AP-2 complex subunit alpha-1                                                                                                                                                                                                                                    |
| 744 | UPI0000456CFD    | 8                    | 17             | 15.4                  | 977    | 107555 | 7.3 | AP-2 complex subunit alpha-1 (Adapter-related protein complex 2 alpha- 1 subunit) (Alpha-adaptin A) (Adaptor protein complex AP-2 alpha-1 subunit) (Clathrin assembly protein complex 2 alpha-A large chain) (100 kDa coated vesicle protein A) (Plasma membran |
| 744 | UPI0000167B50    | 8                    | 17             | 15.4                  | 977    | 107546 | 7   | adaptor-related protein complex 2, alpha 1 subunit isoform 1                                                                                                                                                                                                    |
| 745 | P50443           | 8                    | 42             | 15.2                  | 739    | 81649  | 8.4 | Sulfate transporter                                                                                                                                                                                                                                             |
| 745 | UPI000013DE3D    | 8                    | 42             | 15.2                  | 739    | 81662  | 8.4 | solute carrier family 26 member 2                                                                                                                                                                                                                               |
| 746 | Q12874           | 8                    | 9              | 15.2                  | 501    | 58849  | 5.4 | Splicing factor 3A subunit 3                                                                                                                                                                                                                                    |
| 746 | Q53HM6           | 8                    | 9              | 15.2                  | 501    | 58877  | 5.4 | Splicing factor 3a, subunit 3 variant                                                                                                                                                                                                                           |
| 747 | P11166           | 8                    | 50             | 14                    | 492    | 54084  | 8.7 | Solute carrier family 2, facilitated glucose transporter member 1                                                                                                                                                                                               |

| No. | Accession Number | Unique Peptide Count | Spectrum Count | Sequence Coverage (%) | Length | MolWt  | pI  | Descriptive Name                                                                                                                              |
|-----|------------------|----------------------|----------------|-----------------------|--------|--------|-----|-----------------------------------------------------------------------------------------------------------------------------------------------|
| 747 | UPI000004F0B2    | 8                    | 50             | 14                    | 492    | 54118  | 8.7 | solute carrier family 2 (facilitated glucose transporter), member 1                                                                           |
| 747 | Q0P512           | 8                    | 50             | 14                    | 492    | 54054  | 8.9 | Solute carrier family 2 (Facilitated glucose transporter), member 1                                                                           |
| 748 | Q9NVP1           | 8                    | 22             | 13.6                  | 670    | 75407  | 9.5 | ATP-dependent RNA helicase DDX18                                                                                                              |
| 749 | Q53FR4           | 8                    | 30             | 13.3                  | 796    | 91681  | 5.5 | Vacuolar protein sorting 35 variant                                                                                                           |
| 749 | Q96QK1           | 8                    | 30             | 13.3                  | 796    | 91707  | 5.5 | Vacuolar protein sorting-associated protein 35                                                                                                |
| 750 | Q9NTJ5           | 8                    | 39             | 13.5                  | 587    | 66979  | 7.3 | Hypothetical protein DKFZp434O1328                                                                                                            |
| 750 | Q96AX7           | 8                    | 39             | 13.5                  | 587    | 66951  | 7.1 | SAC1 suppressor of actin mutations 1-like                                                                                                     |
| 750 | O94935           | 8                    | 39             | 13                    | 607    | 69474  | 8   | SAC1 suppressor of actin mutations 1-like protein                                                                                             |
| 751 | UPI00004703AF    | 8                    | 60             | 50                    | 140    | 15079  | 8.9 | sterol carrier protein 2 isoform 2 precursor                                                                                                  |
| 751 | P22307-2         | 8                    | 60             | 49                    | 143    | 15401  | 8.9 | Isoform SCP2 of P22307                                                                                                                        |
| 751 | P22307           | 8                    | 60             | 12.8                  | 547    | 58994  | 6.9 | Nonspecific lipid-transfer protein                                                                                                            |
| 752 | Q1KMD3           | 8                    | 22             | 12.7                  | 747    | 85105  | 4.9 | Heterogeneous nuclear ribonucleoprotein U-like protein 2                                                                                      |
| 753 | UPI0000D62355    | 8                    | 20             | 12.7                  | 739    | 82092  | 6.8 | Vesicle-fusing ATPase (EC 3.6.4.6) (Vesicular-fusion protein NSF) (N-ethylmaleimide sensitive fusion protein) (NEM-sensitive fusion protein). |
| 753 | P46459           | 8                    | 20             | 12.6                  | 744    | 82560  | 7   | Vesicle-fusing ATPase                                                                                                                         |
| 754 | P46977           | 8                    | 82             | 12.6                  | 705    | 80472  | 8.2 | Dolichyl-diphosphooligosaccharide-protein glycosyltransferase subunit STT3A                                                                   |
| 754 | Q8WUB4           | 8                    | 82             | 12.6                  | 705    | 80530  | 8.1 | STT3, subunit of the oligosaccharyltransferase complex, homolog A                                                                             |
| 755 | O60763           | 8                    | 27             | 12.4                  | 962    | 107895 | 4.9 | General vesicular transport factor p115                                                                                                       |
| 755 | UPI00001382BE    | 8                    | 27             | 12.4                  | 962    | 107907 | 4.9 | vesicle docking protein p115                                                                                                                  |
| 755 | Q86TB8           | 8                    | 27             | 12.2                  | 973    | 109187 | 4.9 | Hypothetical protein DKFZp451D234                                                                                                             |
| 756 | Q9H5A4           | 8                    | 271            | 26                    | 338    | 36733  | 5.4 | CD44 molecule                                                                                                                                 |
| 756 | P16070-14        | 8                    | 271            | 22.2                  | 396    | 43157  | 5.3 | Isoform 14 of P16070                                                                                                                          |
| 756 | P16070-13        | 8                    | 271            | 20.7                  | 425    | 46249  | 5.2 | Isoform 13 of P16070                                                                                                                          |
| 756 | P16070-11        | 8                    | 271            | 20.5                  | 429    | 46565  | 5.7 | Isoform 11 of P16070                                                                                                                          |
| 756 | Q9H5A6           | 8                    | 271            | 18.7                  | 470    | 50728  | 5.4 | CD44 molecule                                                                                                                                 |
| 756 | UPI000037848D    | 8                    | 271            | 17.8                  | 493    | 53411  | 5.4 | CD44 antigen isoform 3 precursor                                                                                                              |
| 756 | P16070-10        | 8                    | 271            | 17.8                  | 493    | 53399  | 5.4 | Isoform 10 of P16070                                                                                                                          |
| 756 | P16070-16        | 8                    | 271            | 13.2                  | 668    | 73138  | 5.4 | Isoform 16 of P16070                                                                                                                          |
| 756 | P16070-8         | 8                    | 271            | 13.1                  | 674    | 74404  | 5.2 | Isoform 8 of P16070                                                                                                                           |
| 756 | Q9H5A7           | 8                    | 271            | 13                    | 676    | 73929  | 5.3 | CD44 molecule                                                                                                                                 |
| 756 | P16070-17        | 8                    | 271            | 12.7                  | 691    | 75945  | 5.3 | Isoform 17 of P16070                                                                                                                          |
| 756 | UPI000037848C    | 8                    | 271            | 12.6                  | 699    | 76612  | 5.3 | CD44 antigen isoform 2 precursor                                                                                                              |
| 756 | P16070-6         | 8                    | 271            | 12.6                  | 699    | 76692  | 5.3 | Isoform 6 of P16070                                                                                                                           |
| 756 | P16070-4         | 8                    | 271            | 12.6                  | 699    | 76628  | 5.3 | Isoform 4 of P16070                                                                                                                           |
| 756 | P16070-3         | 8                    | 271            | 12.4                  | 711    | 77999  | 5.4 | Isoform 3 of P16070                                                                                                                           |
| 756 | P16070-7         | 8                    | 271            | 12.3                  | 713    | 78461  | 5.4 | Isoform 7 of P16070                                                                                                                           |
| 756 | Q9H5A5           | 8                    | 271            | 12.2                  | 719    | 78854  | 5.3 | CD44 molecule                                                                                                                                 |

| No. | Accession Number | Unique Peptide Count | Spectrum Count | Sequence Coverage (%) | Length | MolWt  | pI  | Descriptive Name                                                                                                                                      |
|-----|------------------|----------------------|----------------|-----------------------|--------|--------|-----|-------------------------------------------------------------------------------------------------------------------------------------------------------|
| 756 | P16070-5         | 8                    | 271            | 12                    | 734    | 80806  | 5.3 | Isoform 5 of P16070                                                                                                                                   |
| 756 | P16070           | 8                    | 271            | 11.9                  | 742    | 81554  | 5.3 | CD44 antigen precursor                                                                                                                                |
| 756 | UPI000013D3FE    | 8                    | 271            | 11.9                  | 742    | 81538  | 5.3 | CD44 antigen isoform 1 precursor                                                                                                                      |
| 757 | Q9GZV0           | 8                    | 32             | 11.9                  | 767    | 85730  | 6.3 | CDNA FLJ12466 fis, clone NT2RM1000826, highly similar to UNR PROTEIN                                                                                  |
| 757 | O75534-2         | 8                    | 32             | 11.9                  | 767    | 85747  | 6.2 | Isoform Short of O75534                                                                                                                               |
| 757 | O75534           | 8                    | 32             | 11.4                  | 798    | 88885  | 6.2 | Cold shock domain-containing protein E1                                                                                                               |
| 757 | UPI0000456228    | 8                    | 32             | 11.4                  | 798    | 88986  | 6.5 | GTPase NRas precursor (Transforming protein N-Ras).                                                                                                   |
| 757 | UPI0000D61F93    | 8                    | 32             | 11.2                  | 813    | 90706  | 6.7 | GTPase NRas precursor (Transforming protein N-Ras).                                                                                                   |
| 757 | Q68DF1           | 8                    | 32             | 11.2                  | 813    | 90555  | 6.5 | Hypothetical protein DKFZp779B0247                                                                                                                    |
| 758 | Q8TEX9-2         | 8                    | 29             | 12.3                  | 1083   | 118901 | 4.9 | Isoform 2 of Q8TEX9                                                                                                                                   |
| 758 | Q8TEX9           | 8                    | 29             | 12.3                  | 1081   | 118715 | 5   | Importin-4                                                                                                                                            |
| 758 | Q59F14           | 8                    | 29             | 10.5                  | 1264   | 138200 | 5.3 | Importin 4 variant                                                                                                                                    |
| 759 | Q5TG62           | 8                    | 21             | 9.8                   | 971    | 109421 | 7.9 | KIAA0090                                                                                                                                              |
| 759 | Q8N766-2         | 8                    | 21             | 9.6                   | 992    | 111631 | 7.7 | Isoform 2 of Q8N766                                                                                                                                   |
| 759 | Q8N766           | 8                    | 21             | 9.6                   | 993    | 111759 | 7.7 | Uncharacterized protein KIAA0090 precursor                                                                                                            |
| 760 | UPI00001AFA18    | 8                    | 20             | 9.7                   | 979    | 111479 | 7.6 | Probable ATP-dependent RNA helicase DHX36 (EC 3.6.1.-) (DEAH box protein 36) (MLE-like protein 1) (RNA helicase associated with AU-rich element ARE). |
| 760 | Q9H2U1-3         | 8                    | 20             | 9.7                   | 979    | 111495 | 7.6 | Isoform 3 of Q9H2U1                                                                                                                                   |
| 760 | Q9H2U1-2         | 8                    | 20             | 9.6                   | 994    | 113169 | 7.7 | Isoform 2 of Q9H2U1                                                                                                                                   |
| 760 | Q9H2U1           | 8                    | 20             | 9.4                   | 1008   | 114776 | 7.7 | Probable ATP-dependent RNA helicase DHX36                                                                                                             |
| 760 | UPI000013ED25    | 8                    | 20             | 9.4                   | 1008   | 114760 | 7.7 | Probable ATP-dependent RNA helicase DHX36 (EC 3.6.1.-) (DEAH box protein 36) (MLE-like protein 1) (RNA helicase associated with AU-rich element ARE). |
| 761 | O95486           | 8                    | 29             | 9.2                   | 1078   | 118792 | 8.1 | Protein transport protein Sec24A                                                                                                                      |
| 761 | UPI0000457346    | 8                    | 29             | 9.2                   | 1077   | 118677 | 8.2 | Protein transport protein Sec24A (SEC24-related protein A)                                                                                            |
| 761 | UPI0000185FF9    | 8                    | 29             | 9.1                   | 1093   | 119749 | 7.7 | SEC24 related gene family, member A                                                                                                                   |
| 762 | Q9UP95           | 8                    | 27             | 8.8                   | 1085   | 120650 | 6.4 | Solute carrier family 12 member 4                                                                                                                     |
| 763 | Q9NPK3           | 8                    | 28             | 8.8                   | 1245   | 137624 | 6.1 | DJ34F7.7 (Superkiller viralicidic activity 2 (S. cerevisiae homolog)-like (SKI2W))                                                                    |
| 763 | O76046           | 8                    | 28             | 8.7                   | 1246   | 137794 | 6.1 | Putative RNA helicase Ski2w                                                                                                                           |
| 763 | Q5ST66           | 8                    | 28             | 8.7                   | 1246   | 137755 | 6.1 | Superkiller viralicidic activity 2-like                                                                                                               |
| 763 | Q5JP73           | 8                    | 28             | 8.7                   | 1246   | 137737 | 6.1 | Superkiller viralicidic activity 2-like                                                                                                               |
| 763 | Q15477           | 8                    | 28             | 8.7                   | 1246   | 137799 | 6.1 | Helicase SKI2W                                                                                                                                        |
| 764 | UPI00003E59F4    | 8                    | 21             | 10.9                  | 836    | 95843  | 6   | SLIT-ROBO Rho GTPase activating protein 2 isoform b                                                                                                   |
| 764 | A2RUF3           | 8                    | 21             | 8.5                   | 1071   | 120870 | 6.7 | SLIT-ROBO Rho GTPase activating protein 2                                                                                                             |
| 764 | O75044           | 8                    | 21             | 8.5                   | 1071   | 120880 | 6.7 | SLIT-ROBO Rho GTPase-activating protein 2                                                                                                             |

| No. | Accession Number | Unique Peptide Count | Spectrum Count | Sequence Coverage (%) | Length | MolWt  | pI  | Descriptive Name                                                                                                                                                            |
|-----|------------------|----------------------|----------------|-----------------------|--------|--------|-----|-----------------------------------------------------------------------------------------------------------------------------------------------------------------------------|
| 765 | Q96F88           | 8                    | 29             | 8.4                   | 1024   | 114681 | 9.2 | Processing of 1, ribonuclease P/MRP subunit                                                                                                                                 |
| 765 | Q99575           | 8                    | 29             | 8.4                   | 1024   | 114709 | 9.2 | Ribonucleases P/MRP protein subunit POP1                                                                                                                                    |
| 766 | Q53RX7           | 8                    | 29             | 8.4                   | 1073   | 119476 | 6.8 | Hypothetical protein ITGA6                                                                                                                                                  |
| 766 | P23229-4         | 8                    | 29             | 8.4                   | 1068   | 119074 | 7.3 | Isoform Alpha                                                                                                                                                               |
| 766 | P23229-2         | 8                    | 29             | 8.4                   | 1073   | 119462 | 6.8 | Isoform Alpha                                                                                                                                                               |
| 766 | UPI0000366FA3    | 8                    | 29             | 8.3                   | 1086   | 121665 | 7.4 | Integrin alpha-6 precursor (VLA-6) (CD49f antigen) [Contains: Integrin alpha-6 heavy chain; Integrin alpha-6 light chain].                                                  |
| 766 | P23229-5         | 8                    | 29             | 8.3                   | 1086   | 121678 | 7.6 | Isoform Alpha                                                                                                                                                               |
| 766 | UPI0000EA87E5    | 8                    | 29             | 8.2                   | 1091   | 122053 | 6.8 | integrin alpha chain, alpha 6 isoform a precursor                                                                                                                           |
| 766 | P23229-3         | 8                    | 29             | 8.2                   | 1091   | 122066 | 7   | Isoform Alpha                                                                                                                                                               |
| 766 | UPI0000D6126A    | 8                    | 29             | 8.1                   | 1112   | 124028 | 6.6 | Integrin alpha-6 precursor (VLA-6) (CD49f antigen) [Contains: Integrin alpha-6 heavy chain; Integrin alpha-6 light chain].                                                  |
| 766 | P23229-6         | 8                    | 29             | 8.1                   | 1112   | 124014 | 6.6 | Isoform Alpha                                                                                                                                                               |
| 766 | P23229           | 8                    | 29             | 8                     | 1130   | 126618 | 6.8 | Integrin alpha-6 precursor (VLA-6) (CD49f antigen) [Contains: Integrin alpha-6 heavy chain; Integrin alpha-6 light chain]                                                   |
| 766 | UPI000013D4BA    | 8                    | 29             | 8                     | 1130   | 126605 | 6.6 | Integrin alpha-6 precursor (VLA-6) (CD49f antigen) [Contains: Integrin alpha-6 heavy chain; Integrin alpha-6 light chain].                                                  |
| 767 | O75153           | 8                    | 15             | 7.9                   | 1309   | 146669 | 6.1 | Putative eukaryotic translation initiation factor 3 subunit                                                                                                                 |
| 767 | UPI0000D622A0    | 8                    | 15             | 7.9                   | 1310   | 146826 | 6.2 | Putative eukaryotic translation initiation factor 3 subunit (eIF-3).                                                                                                        |
| 768 | O15067           | 8                    | 14             | 7.8                   | 1338   | 144664 | 5.8 | Phosphoribosylformylglycinamide synthase                                                                                                                                    |
| 768 | UPI00001A95E5    | 8                    | 14             | 7.8                   | 1338   | 144734 | 5.8 | phosphoribosylformylglycinamide synthase                                                                                                                                    |
| 769 | UPI0000D625ED    | 8                    | 34             | 8.3                   | 1316   | 149100 | 5.6 | Nuclear pore complex protein Nup160 (Nucleoporin Nup160) (160 kDa nucleoporin).                                                                                             |
| 769 | Q12769           | 8                    | 34             | 8.3                   | 1316   | 149001 | 5.6 | Nuclear pore complex protein Nup160                                                                                                                                         |
| 769 | Q08AD3           | 8                    | 34             | 7.6                   | 1436   | 162091 | 5.5 | Nucleoporin 160kDa                                                                                                                                                          |
| 769 | UPI0000185FEB    | 8                    | 34             | 7.6                   | 1436   | 162121 | 5.5 | nucleoporin 160kDa                                                                                                                                                          |
| 770 | Q9Y6M7-4         | 8                    | 37             | 8.9                   | 1000   | 112448 | 7.1 | Isoform 4 of Q9Y6M7                                                                                                                                                         |
| 770 | UPI0000D61AE5    | 8                    | 37             | 8.8                   | 1017   | 114060 | 6.8 | Sodium bicarbonate cotransporter 3 (Sodium bicarbonate cotransporter 2) (Sodium bicarbonate cotransporter 2b) (Bicarbonate transporter) (Solute carrier family 4 member 7). |
| 770 | Q9Y6M7-3         | 8                    | 37             | 8.7                   | 1018   | 114205 | 7.3 | Isoform 3 of Q9Y6M7                                                                                                                                                         |
| 770 | UPI0000D61AE4    | 8                    | 37             | 8.2                   | 1092   | 123253 | 6.9 | Sodium bicarbonate cotransporter 3 (Sodium bicarbonate cotransporter 2) (Sodium bicarbonate cotransporter 2b) (Bicarbonate transporter) (Solute carrier family 4 member 7). |
| 770 | Q9Y6M7-2         | 8                    | 37             | 8.2                   | 1090   | 123081 | 6.9 | Isoform 2 of Q9Y6M7                                                                                                                                                         |
| 770 | Q9Y6M7           | 8                    | 37             | 7.3                   | 1214   | 136043 | 6.8 | Sodium bicarbonate cotransporter 3                                                                                                                                          |

| No. | Accession Number | Unique Peptide Count | Spectrum Count | Sequence Coverage (%) | Length | MolWt  | pI   | Descriptive Name                                                                                                                                                            |
|-----|------------------|----------------------|----------------|-----------------------|--------|--------|------|-----------------------------------------------------------------------------------------------------------------------------------------------------------------------------|
| 770 | UPI0000DBEEB7    | 8                    | 37             | 7.3                   | 1214   | 136044 | 6.7  | solute carrier family 4, sodium bicarbonate cotransporter, member 7                                                                                                         |
| 770 | UPI0000D61AE3    | 8                    | 37             | 7.3                   | 1224   | 137157 | 6.8  | Sodium bicarbonate cotransporter 3 (Sodium bicarbonate cotransporter 2) (Sodium bicarbonate cotransporter 2b) (Bicarbonate transporter) (Solute carrier family 4 member 7). |
| 771 | Q9UKV3           | 8                    | 25             | 7.1                   | 1341   | 151887 | 6.4  | Apoptotic chromatin condensation inducer in the nucleus                                                                                                                     |
| 771 | UPI000013D308    | 8                    | 25             | 7.1                   | 1341   | 151861 | 6.4  | Apoptotic chromatin condensation inducer in the nucleus (Acinus).                                                                                                           |
| 772 | O15085           | 8                    | 18             | 6.4                   | 1522   | 167704 | 5.5  | Rho guanine nucleotide exchange factor 11                                                                                                                                   |
| 772 | UPI0000456283    | 8                    | 18             | 6.2                   | 1560   | 172038 | 5.6  | Rho guanine nucleotide exchange factor 11 (PDZ-RhoGEF).                                                                                                                     |
| 772 | Q6PFW2           | 8                    | 18             | 6.2                   | 1562   | 172243 | 5.5  | Rho guanine nucleotide exchange factor (GEF) 11                                                                                                                             |
| 773 | Q53SJ7           | 8                    | 16             | 6.2                   | 1337   | 155520 | 6    | Hypothetical protein ROCK2                                                                                                                                                  |
| 773 | O75116           | 8                    | 16             | 6                     | 1388   | 160912 | 6    | Rho-associated protein kinase 2                                                                                                                                             |
| 773 | UPI000049DEE3    | 8                    | 16             | 6                     | 1388   | 160981 | 6.2  | Rho-associated protein kinase 2 (EC 2.7.11.1) (Rho-associated, coiled-coil-containing protein kinase 2) (p164 ROCK-2) (Rho kinase 2).                                       |
| 773 | UPI000034ECB0    | 8                    | 16             | 6                     | 1388   | 160899 | 6    | Rho-associated, coiled-coil containing protein kinase 2                                                                                                                     |
| 774 | Q5UIP0           | 8                    | 13             | 4.8                   | 2472   | 274464 | 5.5  | Telomere-associated protein RIF1                                                                                                                                            |
| 774 | UPI0000D6124A    | 8                    | 13             | 4.8                   | 2448   | 271915 | 5.4  | Telomere-associated protein RIF1 (Rap1-interacting factor 1 homolog).                                                                                                       |
| 774 | UPI0000D61249    | 8                    | 13             | 4.8                   | 2474   | 274691 | 5.5  | Telomere-associated protein RIF1 (Rap1-interacting factor 1 homolog).                                                                                                       |
| 774 | Q5UIP0-2         | 8                    | 13             | 4.8                   | 2446   | 271688 | 5.4  | Isoform 2 of Q5UIP0                                                                                                                                                         |
| 775 | UPI00006C1433    | 8                    | 11             | 4.2                   | 2146   | 241643 | 6.6  | PREDICTED: similar to YLP motif-containing protein 1 (Nuclear protein ZAP3) (ZAP113) isoform 2                                                                              |
| 776 | Q63HN8           | 8                    | 10             | 3.1                   | 3280   | 373981 | 6.9  | RING finger protein 213                                                                                                                                                     |
| 776 | UPI0000D623A6    | 8                    | 10             | 3.1                   | 3279   | 373852 | 6.9  | CDNA FLJ13809 fis, clone THYRO1000270 (C17orf27 protein).                                                                                                                   |
| 777 | Q14789           | 8                    | 14             | 2.9                   | 3259   | 376019 | 5    | Golgin subfamily B member 1                                                                                                                                                 |
| 777 | UPI000012B42C    | 8                    | 14             | 2.9                   | 3259   | 376078 | 5    | golgi autoantigen, golgin subfamily b, macrogolgin (with transmembrane signal), 1                                                                                           |
| 778 | O75368           | 7                    | 42             | 71.1                  | 114    | 12774  | 5.2  | SH3 domain-binding glutamic acid-rich-like protein                                                                                                                          |
| 779 | P62888           | 7                    | 110            | 59.1                  | 115    | 12784  | 9.6  | 60S ribosomal protein L30                                                                                                                                                   |
| 780 | P61326           | 7                    | 34             | 58.9                  | 146    | 17164  | 6.1  | Protein mago nashi homolog                                                                                                                                                  |
| 780 | Q96A72           | 7                    | 34             | 58.1                  | 148    | 17276  | 6.4  | Protein mago nashi homolog 2                                                                                                                                                |
| 781 | P62244           | 7                    | 120            | 58.5                  | 130    | 14839  | 10.1 | 40S ribosomal protein S15a                                                                                                                                                  |
| 782 | Q2YDC2           | 7                    | 33             | 57.1                  | 189    | 21664  | 5.4  | Programmed cell death 6                                                                                                                                                     |
| 782 | O75340           | 7                    | 33             | 56.5                  | 191    | 21868  | 5.4  | Programmed cell death protein 6                                                                                                                                             |

| No. | Accession Number | Unique Peptide Count | Spectrum Count | Sequence Coverage (%) | Length | MolWt | pI   | Descriptive Name                                                                                                                                                                                                                                                              |
|-----|------------------|----------------------|----------------|-----------------------|--------|-------|------|-------------------------------------------------------------------------------------------------------------------------------------------------------------------------------------------------------------------------------------------------------------------------------|
| 783 | Q8NBT2           | 7                    | 26             | 55.8                  | 197    | 22443 | 4.7  | Kinetochore protein Spc24                                                                                                                                                                                                                                                     |
| 784 | Q9UHV9           | 7                    | 33             | 54.5                  | 154    | 16648 | 6.6  | Prefoldin subunit 2                                                                                                                                                                                                                                                           |
| 785 | P46405           | 7                    | 49             | 53.8                  | 132    | 14515 | 7.2  | 40S ribosomal protein S12                                                                                                                                                                                                                                                     |
| 786 | Q9ULC4           | 7                    | 39             | 52.5                  | 181    | 20555 | 8.8  | Malignant T cell amplified sequence 1                                                                                                                                                                                                                                         |
| 787 | Q9NVJ2           | 7                    | 28             | 51.6                  | 186    | 21539 | 8.4  | ADP-ribosylation factor-like protein 8B                                                                                                                                                                                                                                       |
| 788 | P10599           | 7                    | 146            | 51.4                  | 105    | 11737 | 4.9  | Thioredoxin                                                                                                                                                                                                                                                                   |
| 789 | Q01469           | 7                    | 43             | 49.6                  | 135    | 15164 | 7    | Fatty acid-binding protein, epidermal                                                                                                                                                                                                                                         |
| 790 | Q9UBQ5           | 7                    | 67             | 49.1                  | 218    | 25060 | 4.9  | Eukaryotic translation initiation factor 3 subunit 12                                                                                                                                                                                                                         |
| 791 | P61006           | 7                    | 24             | 48.8                  | 207    | 23668 | 9.1  | Ras-related protein Rab-8A                                                                                                                                                                                                                                                    |
| 792 | P16949           | 7                    | 90             | 48.3                  | 149    | 17302 | 6    | Stathmin                                                                                                                                                                                                                                                                      |
| 793 | Q9BSD7           | 7                    | 19             | 47.9                  | 190    | 20713 | 9.5  | Probable UPF0334 kinase-like protein C1orf57                                                                                                                                                                                                                                  |
| 794 | Q9NYG7           | 7                    | 96             | 50.3                  | 179    | 19718 | 5.4  | Bax-sigma                                                                                                                                                                                                                                                                     |
| 794 | Q07812           | 7                    | 96             | 46.9                  | 192    | 21184 | 5.2  | Apoptosis regulator BAX, membrane isoform alpha                                                                                                                                                                                                                               |
| 794 | Q07814           | 7                    | 96             | 41.3                  | 218    | 24220 | 7.9  | Apoptosis regulator BAX, cytoplasmic isoform beta                                                                                                                                                                                                                             |
| 795 | P30044           | 7                    | 78             | 44.4                  | 214    | 22026 | 8.6  | Peroxisome assembly factor 1, mitochondrial precursor                                                                                                                                                                                                                         |
| 795 | UPI000013D62C    | 7                    | 78             | 44.4                  | 214    | 22086 | 8.7  | Peroxisome assembly factor 1, mitochondrial precursor (EC 1.11.1.15) (Prx-V) (Peroxisomal antioxidant enzyme) (PLP) (Thioredoxin reductase) (Thioredoxin peroxidase PMP20) (Antioxidant enzyme B166) (AOEB166) (TPx type VI) (Liver tissue 2D-page spot 71B) (Alu corepresso) |
| 796 | P62158           | 7                    | 89             | 44.3                  | 149    | 16838 | 4.2  | Calmodulin                                                                                                                                                                                                                                                                    |
| 797 | Q9BUF5           | 7                    | 25             | 43.7                  | 446    | 49857 | 4.9  | Tubulin beta-6 chain                                                                                                                                                                                                                                                          |
| 798 | P31150           | 7                    | 25             | 43                    | 447    | 50583 | 5.1  | Rab GDP dissociation inhibitor alpha                                                                                                                                                                                                                                          |
| 799 | Q53F37           | 7                    | 21             | 42.4                  | 198    | 22410 | 6.1  | SAR1a gene homolog 2 variant                                                                                                                                                                                                                                                  |
| 799 | Q9Y6B6           | 7                    | 21             | 42.4                  | 198    | 22410 | 6.1  | GTP-binding protein SAR1b                                                                                                                                                                                                                                                     |
| 800 | P04632           | 7                    | 73             | 41.4                  | 268    | 28316 | 5.2  | Calpain small subunit 1                                                                                                                                                                                                                                                       |
| 801 | P62277           | 7                    | 92             | 41.1                  | 151    | 17222 | 10.5 | 40S ribosomal protein S13                                                                                                                                                                                                                                                     |
| 802 | P25789           | 7                    | 26             | 40.6                  | 261    | 29484 | 7.7  | Proteasome subunit alpha type 4                                                                                                                                                                                                                                               |
| 803 | P46779           | 7                    | 95             | 40.1                  | 137    | 15747 | 12   | 60S ribosomal protein L28                                                                                                                                                                                                                                                     |
| 804 | P02792           | 7                    | 79             | 40                    | 175    | 20020 | 5.8  | Ferritin light chain                                                                                                                                                                                                                                                          |
| 804 | Q96CU0           | 7                    | 79             | 40                    | 175    | 20039 | 5.8  | Ferritin, light polypeptide                                                                                                                                                                                                                                                   |
| 804 | Q8WU07           | 7                    | 79             | 40                    | 175    | 20062 | 5.8  | Ferritin, light polypeptide                                                                                                                                                                                                                                                   |
| 804 | Q6IBT7           | 7                    | 79             | 40                    | 175    | 19992 | 5.8  | Ferritin                                                                                                                                                                                                                                                                      |
| 805 | Q6IPF4           | 7                    | 59             | 39.9                  | 366    | 38651 | 6.8  | Poly(RC) binding protein 2                                                                                                                                                                                                                                                    |
| 805 | UPI0000456618    | 7                    | 59             | 39.9                  | 366    | 38634 | 6.8  | Poly(rC)-binding protein 2 (Alpha-CP2) (hnRNP-E2).                                                                                                                                                                                                                            |
| 806 | P63000           | 7                    | 46             | 43.2                  | 192    | 21450 | 8.5  | Ras-related C3 botulinum toxin substrate 1 precursor                                                                                                                                                                                                                          |
| 806 | A4D2P0           | 7                    | 46             | 39.3                  | 211    | 23467 | 8.6  | Ras-related C3 botulinum toxin substrate 1                                                                                                                                                                                                                                    |
| 807 | Q9NWU5           | 7                    | 15             | 39.3                  | 206    | 23641 | 9.9  | 39S ribosomal protein L22, mitochondrial precursor                                                                                                                                                                                                                            |
| 807 | UPI000013D5D9    | 7                    | 15             | 35.7                  | 227    | 26063 | 9.6  | 39S ribosomal protein L22, mitochondrial precursor (L22mt) (MRP-L22).                                                                                                                                                                                                         |
| 808 | O95336           | 7                    | 18             | 39.1                  | 258    | 27547 | 6.1  | 6-phosphogluconolactonase                                                                                                                                                                                                                                                     |
| 809 | Q0QEW2           | 7                    | 90             | 44.5                  | 164    | 18732 | 11.8 | Ribosomal protein L18                                                                                                                                                                                                                                                         |
| 809 | Q07020           | 7                    | 90             | 38.8                  | 188    | 21634 | 11.7 | 60S ribosomal protein L18                                                                                                                                                                                                                                                     |

| No. | Accession Number | Unique Peptide Count | Spectrum Count | Sequence Coverage (%) | Length | MolWt | pI   | Descriptive Name                                                                                             |
|-----|------------------|----------------------|----------------|-----------------------|--------|-------|------|--------------------------------------------------------------------------------------------------------------|
| 810 | P51858           | 7                    | 34             | 37.5                  | 240    | 26788 | 4.7  | Hepatoma-derived growth factor                                                                               |
| 811 | P08579           | 7                    | 48             | 37.3                  | 225    | 25486 | 9.7  | U2 small nuclear ribonucleoprotein B"                                                                        |
| 812 | Q9UL25           | 7                    | 41             | 37.3                  | 225    | 24348 | 7.9  | Ras-related protein Rab-21                                                                                   |
| 813 | Q969H8           | 7                    | 77             | 37                    | 173    | 18795 | 6.7  | Uncharacterized protein C19orf10 precursor                                                                   |
| 814 | O14579           | 7                    | 24             | 36                    | 308    | 34482 | 5.1  | Coatomer subunit epsilon                                                                                     |
| 814 | Q9UGP6           | 7                    | 24             | 36                    | 308    | 34494 | 5.1  | Epsilon COP                                                                                                  |
| 814 | Q53HJ6           | 7                    | 24             | 36                    | 308    | 34528 | 5.1  | Epsilon subunit of coatomer protein complex isoform a variant                                                |
| 815 | Q6IPH7           | 7                    | 68             | 35.5                  | 220    | 23787 | 10.9 | RPL14 protein                                                                                                |
| 816 | Q9NRX2           | 7                    | 16             | 35.4                  | 175    | 20050 | 10.1 | 39S ribosomal protein L17, mitochondrial precursor                                                           |
| 817 | P49755           | 7                    | 132            | 35.2                  | 219    | 24976 | 7.5  | Transmembrane emp24 domain-containing protein 10 precursor                                                   |
| 817 | Q53GF9           | 7                    | 132            | 34.2                  | 225    | 25637 | 6.7  | Full-length cDNA 5-PRIME end of clone CS0DF013YM24 of Fetal brain of Homo sapiens (Human) variant            |
| 818 | Q15404           | 7                    | 21             | 34.7                  | 277    | 31540 | 8.6  | Ras suppressor protein 1                                                                                     |
| 819 | UPI000013D771    | 7                    | 12             | 34.7                  | 357    | 38325 | 8    | Sorbitol dehydrogenase (EC 1.1.1.14) (L-iditol 2-dehydrogenase).                                             |
| 820 | Q9BRG1           | 7                    | 26             | 33.5                  | 176    | 20748 | 6.3  | Vacuolar protein sorting-associated protein 25                                                               |
| 821 | Q9BUP3           | 7                    | 24             | 33.5                  | 242    | 27118 | 8.6  | Oxidoreductase HTATIP2                                                                                       |
| 822 | Q9Y3A5           | 7                    | 37             | 32.4                  | 250    | 28764 | 8.7  | Shwachman-Bodian-Diamond syndrome protein                                                                    |
| 823 | P52597           | 7                    | 29             | 32.3                  | 415    | 45672 | 5.6  | Heterogeneous nuclear ribonucleoprotein F                                                                    |
| 824 | Q9UKD2           | 7                    | 13             | 32.2                  | 239    | 27560 | 8.3  | mRNA turnover protein 4 homolog                                                                              |
| 825 | Q13242           | 7                    | 22             | 32.1                  | 221    | 25542 | 8.6  | Splicing factor, arginine/serine-rich 9                                                                      |
| 826 | Q14257           | 7                    | 32             | 31.9                  | 317    | 36876 | 4.4  | Reticulocalbin-2 precursor                                                                                   |
| 827 | Q14696           | 7                    | 25             | 31.2                  | 234    | 26077 | 7.8  | Mesoderm development candidate 2                                                                             |
| 828 | Q6IBS0           | 7                    | 26             | 31.2                  | 349    | 39548 | 6.9  | Twinfilin-2                                                                                                  |
| 829 | P39748           | 7                    | 15             | 31.1                  | 380    | 42593 | 8.6  | Flap endonuclease 1                                                                                          |
| 830 | P06748-2         | 7                    | 178            | 34.3                  | 265    | 29465 | 4.6  | Isoform 2 of P06748                                                                                          |
| 830 | P06748           | 7                    | 178            | 31                    | 294    | 32575 | 4.8  | Nucleophosmin                                                                                                |
| 831 | Q9NX40           | 7                    | 26             | 31                    | 245    | 27626 | 7.5  | OClA domain-containing protein 1                                                                             |
| 832 | P50479           | 7                    | 14             | 30.6                  | 330    | 35398 | 7.9  | PDZ and LIM domain protein 4                                                                                 |
| 833 | P31937           | 7                    | 20             | 29.8                  | 336    | 35329 | 8.1  | 3-hydroxyisobutyrate dehydrogenase, mitochondrial precursor                                                  |
| 834 | Q13011           | 7                    | 26             | 28.7                  | 328    | 35816 | 8    | Delta(3,5)-Delta(2,4)-dienoyl-CoA isomerase, mitochondrial precursor                                         |
| 835 | P62753           | 7                    | 75             | 28.5                  | 249    | 28681 | 10.8 | 40S ribosomal protein S6                                                                                     |
| 835 | Q96DV6           | 7                    | 75             | 28.5                  | 249    | 28709 | 10.9 | Ribosomal protein S6                                                                                         |
| 836 | UPI00006C0D04    | 7                    | 26             | 28.4                  | 370    | 40821 | 8.9  | PREDICTED: similar to Actin-related protein 2/3 complex subunit 1B (ARP2/3 complex 41 kDa subunit) (p41-ARC) |
| 836 | O15143           | 7                    | 26             | 28.2                  | 372    | 40950 | 8.4  | Actin-related protein 2/3 complex subunit 1B                                                                 |
| 837 | Q12771           | 7                    | 78             | 28                    | 286    | 31481 | 7.4  | P37 AUF1                                                                                                     |
| 837 | Q14103-4         | 7                    | 78             | 27.9                  | 287    | 30672 | 8.4  | Isoform 4 of Q14103                                                                                          |
| 837 | Q14103-3         | 7                    | 78             | 26.1                  | 306    | 32835 | 8.2  | Isoform 3 of Q14103                                                                                          |



| No. | Accession Number | Unique Peptide Count | Spectrum Count | Sequence Coverage (%) | Length | MolWt  | pI  | Descriptive Name                                                                               |
|-----|------------------|----------------------|----------------|-----------------------|--------|--------|-----|------------------------------------------------------------------------------------------------|
| 837 | UPI0000D6158B    | 7                    | 78             | 24.2                  | 330    | 36464  | 8.5 | Heterogeneous nuclear ribonucleoprotein D0 (hnRNP D0) (AU-rich element RNA-binding protein 1). |
| 837 | Q14103-2         | 7                    | 78             | 23.8                  | 336    | 36272  | 8.1 | Isoform 2 of Q14103                                                                            |
| 837 | Q14103           | 7                    | 78             | 22.5                  | 355    | 38434  | 7.8 | Heterogeneous nuclear ribonucleoprotein D0                                                     |
| 838 | Q15717           | 7                    | 68             | 27.3                  | 326    | 36092  | 9.2 | ELAV-like protein 1                                                                            |
| 839 | P62873           | 7                    | 34             | 27.1                  | 340    | 37377  | 6   | Guanine nucleotide-binding protein G(I)/G(S)/G(T) subunit beta 1                               |
| 840 | O43684           | 7                    | 26             | 26.8                  | 328    | 37155  | 6.8 | Mitotic checkpoint protein BUB3                                                                |
| 841 | P30443           | 7                    | 30             | 26.8                  | 365    | 40846  | 6.5 | HLA class I histocompatibility antigen, A-1 alpha chain precursor                              |
| 841 | P30455           | 7                    | 30             | 26.8                  | 365    | 40934  | 6.4 | HLA class I histocompatibility antigen, A-36 alpha chain precursor                             |
| 842 | P61289           | 7                    | 44             | 26.8                  | 254    | 29506  | 6   | Proteasome activator complex subunit 3                                                         |
| 842 | P61289-2         | 7                    | 44             | 25.5                  | 267    | 30887  | 6.1 | Isoform 2 of P61289                                                                            |
| 843 | Q8TBC0           | 7                    | 19             | 30.4                  | 342    | 39732  | 5.6 | Similar to GNAS complex locus                                                                  |
| 843 | Q14433           | 7                    | 19             | 27.4                  | 379    | 44179  | 6.3 | Guanine nucleotide-binding protein G-s-alpha-3                                                 |
| 843 | P63092-2         | 7                    | 19             | 27.4                  | 380    | 44266  | 6.3 | Isoform Gnas                                                                                   |
| 843 | P63092           | 7                    | 19             | 26.4                  | 394    | 45665  | 5.8 | Guanine nucleotide-binding protein G(s) subunit alpha isoforms short                           |
| 843 | UPI000004D202    | 7                    | 19             | 26.3                  | 395    | 45752  | 5.8 | GNAS complex locus isoform f                                                                   |
| 843 | UPI0000D610C3    | 7                    | 19             | 21.5                  | 484    | 54674  | 8.9 | Neuroendocrine secretory protein 55 (NESP55) [Contains: LHAL tetrapeptide; GPIPIRRH peptide].  |
| 843 | UPI0000D610C1    | 7                    | 19             | 14.4                  | 721    | 78734  | 5.8 | Neuroendocrine secretory protein 55 (NESP55) [Contains: LHAL tetrapeptide; GPIPIRRH peptide].  |
| 843 | UPI00004A39FA    | 7                    | 19             | 14.4                  | 722    | 78821  | 5.8 | Neuroendocrine secretory protein 55 (NESP55) [Contains: LHAL tetrapeptide; GPIPIRRH peptide].  |
| 843 | UPI0000456FBC    | 7                    | 19             | 11.5                  | 908    | 97549  | 5.3 | Neuroendocrine secretory protein 55 (NESP55) [Contains: LHAL tetrapeptide; GPIPIRRH peptide].  |
| 843 | Q5JWF2-2         | 7                    | 19             | 10.2                  | 1023   | 109626 | 5.1 | Isoform XLas                                                                                   |
| 843 | Q5JWF2           | 7                    | 19             | 10                    | 1037   | 111024 | 5   | Guanine nucleotide-binding protein G(s) subunit alpha isoforms XLas                            |
| 844 | Q7Z518           | 7                    | 13             | 26.3                  | 354    | 40677  | 8.5 | NADH dehydrogenase                                                                             |
| 844 | O95299           | 7                    | 13             | 26.2                  | 355    | 40751  | 8.5 | NADH dehydrogenase [ubiquinone] 1 alpha subcomplex subunit 10, mitochondrial precursor         |
| 844 | Q5R9E8           | 7                    | 13             | 26.2                  | 355    | 40719  | 8.5 | NADH dehydrogenase [ubiquinone] 1 alpha subcomplex subunit 10, mitochondrial precursor         |
| 845 | P25788-2         | 7                    | 33             | 26.6                  | 248    | 27647  | 5.3 | Isoform 2 of P25788                                                                            |
| 845 | P25788           | 7                    | 33             | 25.9                  | 255    | 28433  | 5.3 | Proteasome subunit alpha type 3                                                                |
| 845 | Q6IB71           | 7                    | 33             | 25.9                  | 255    | 28415  | 5.3 | Proteasome subunit alpha type                                                                  |

| No. | Accession Number | Unique Peptide Count | Spectrum Count | Sequence Coverage (%) | Length | MolWt | pI   | Descriptive Name                                                                                           |
|-----|------------------|----------------------|----------------|-----------------------|--------|-------|------|------------------------------------------------------------------------------------------------------------|
| 846 | P68400           | 7                    | 14             | 25.3                  | 391    | 45144 | 7.7  | Casein kinase II subunit alpha                                                                             |
| 846 | UPI0000D61015    | 7                    | 14             | 25.1                  | 395    | 45682 | 7.9  | Casein kinase II subunit alpha (EC 2.7.11.1) (CK II).                                                      |
| 846 | Q5U5J2           | 7                    | 14             | 24.9                  | 397    | 45909 | 7.9  | CSNK2A1 protein                                                                                            |
| 847 | Q8TDN6           | 7                    | 19             | 24.9                  | 353    | 41401 | 9.9  | Brix domain-containing protein 2                                                                           |
| 848 | P31350           | 7                    | 16             | 24.7                  | 389    | 44878 | 5.4  | Ribonucleoside-diphosphate reductase M2 subunit                                                            |
| 849 | Q16543           | 7                    | 26             | 24.6                  | 378    | 44468 | 5.2  | Hsp90 co-chaperone Cdc37                                                                                   |
| 850 | Q8WXE8           | 7                    | 23             | 24.4                  | 393    | 45571 | 6.6  | Paraspeckle protein 1 beta isoform                                                                         |
| 850 | Q8WXF1           | 7                    | 23             | 18.4                  | 523    | 58744 | 6.7  | Paraspeckle component 1                                                                                    |
| 851 | P35237           | 7                    | 12             | 24.2                  | 376    | 42590 | 5.3  | Serpin B6                                                                                                  |
| 851 | Q5TD06           | 7                    | 12             | 24.2                  | 376    | 42622 | 5.3  | Serpin peptidase inhibitor, clade B (Ovalbumin), member 6                                                  |
| 851 | Q59F97           | 7                    | 12             | 23.2                  | 393    | 44446 | 5.2  | Hypothetical protein                                                                                       |
| 851 | UPI0000D613D8    | 7                    | 12             | 22.2                  | 409    | 46331 | 5.9  | Serpin B6 (Placental thrombin inhibitor) (Cytoplasmic antiproteinase) (CAP) (Protease inhibitor 6) (PI-6). |
| 852 | P24752           | 7                    | 24             | 23                    | 427    | 45200 | 8.8  | Acetyl-CoA acetyltransferase, mitochondrial precursor                                                      |
| 853 | P49585           | 7                    | 25             | 22.6                  | 367    | 41732 | 6.9  | Choline-phosphate cytidyltransferase A                                                                     |
| 853 | Q86Y88           | 7                    | 25             | 22.6                  | 367    | 41731 | 7.3  | Phosphate cytidyltransferase 1, choline, alpha                                                             |
| 854 | A0PJ61           | 7                    | 33             | 22.5                  | 440    | 49490 | 10.1 | Hypothetical protein                                                                                       |
| 854 | Q32Q62           | 7                    | 33             | 21.3                  | 464    | 52165 | 10.2 | RSL1D1 protein                                                                                             |
| 854 | O76021           | 7                    | 33             | 20.2                  | 490    | 54973 | 10.1 | Ribosomal L1 domain-containing protein 1                                                                   |
| 855 | P53007           | 7                    | 16             | 22.5                  | 311    | 34013 | 9.9  | Tricarboxylate transport protein, mitochondrial precursor                                                  |
| 855 | Q6LAP8           | 7                    | 16             | 22                    | 318    | 34788 | 9.9  | Mitochondrial citrate transport protein                                                                    |
| 856 | O43237           | 7                    | 16             | 22.4                  | 492    | 54099 | 6.4  | Cytoplasmic dynein 1 light intermediate chain 2                                                            |
| 857 | Q7Z503           | 7                    | 15             | 24.1                  | 403    | 43611 | 5.6  | Beta-succinyl CoA synthetase                                                                               |
| 857 | Q5T9Q6           | 7                    | 15             | 22                    | 441    | 48040 | 7.1  | Succinate-CoA ligase, ADP-forming, beta subunit                                                            |
| 857 | Q9P2R7           | 7                    | 15             | 21                    | 463    | 50317 | 7.4  | Succinyl-CoA ligase [ADP-forming] beta-chain, mitochondrial precursor                                      |
| 858 | O60884           | 7                    | 14             | 21.8                  | 412    | 45746 | 6.5  | DnaJ homolog subfamily A member 2                                                                          |
| 859 | O75367-2         | 7                    | 20             | 22                    | 369    | 39183 | 9.8  | Isoform 1 of O75367                                                                                        |
| 859 | O75367           | 7                    | 20             | 21.8                  | 372    | 39617 | 9.8  | Core histone macro-H2A.1                                                                                   |
| 860 | Q9UM22           | 7                    | 26             | 33                    | 224    | 25437 | 6.7  | Mammalian ependymin-related protein 1 precursor                                                            |
| 860 | A4D1W8           | 7                    | 26             | 21.5                  | 344    | 38151 | 9.6  | Upregulated in colorectal cancer gene 1                                                                    |
| 860 | Q96J80           | 7                    | 26             | 21.5                  | 344    | 38141 | 9.6  | Mammalian ependymin related protein 1                                                                      |
| 861 | Q5U8W9           | 7                    | 22             | 21.4                  | 327    | 37557 | 5.7  | Protein arginine methyltransferase 1 isoform 4                                                             |
| 861 | Q2VP93           | 7                    | 22             | 20.4                  | 343    | 39602 | 5.6  | Protein arginine methyltransferase 1                                                                       |
| 861 | Q99873-3         | 7                    | 22             | 20.4                  | 343    | 39572 | 5.7  | Isoform 3 of Q99873                                                                                        |
| 861 | Q99873-2         | 7                    | 22             | 20.2                  | 347    | 39899 | 5.7  | Isoform 2 of Q99873                                                                                        |
| 861 | Q6LEU5           | 7                    | 22             | 20.2                  | 347    | 39929 | 5.6  | HRMT1L2 protein                                                                                            |
| 861 | Q8WUW5           | 7                    | 22             | 19.9                  | 352    | 40417 | 5.5  | PRMT1 protein                                                                                              |

| No. | Accession Number | Unique Peptide Count | Spectrum Count | Sequence Coverage (%) | Length | MolWt | pI  | Descriptive Name                                                                                                                                           |
|-----|------------------|----------------------|----------------|-----------------------|--------|-------|-----|------------------------------------------------------------------------------------------------------------------------------------------------------------|
| 861 | UPI000013CBFF    | 7                    | 22             | 19.5                  | 359    | 41255 | 5.5 | Protein arginine N-methyltransferase 1 (EC 2.1.1.-) (Interferon receptor 1-bound protein 4).                                                               |
| 861 | Q99873           | 7                    | 22             | 19.4                  | 361    | 41486 | 5.5 | Protein arginine N-methyltransferase 1                                                                                                                     |
| 862 | P49257           | 7                    | 87             | 20.2                  | 510    | 57549 | 6.8 | ERGIC-53 protein precursor                                                                                                                                 |
| 862 | Q53FS4           | 7                    | 87             | 20.2                  | 510    | 57558 | 6.8 | Lectin, mannose-binding, 1 variant                                                                                                                         |
| 863 | Q6NZI2           | 7                    | 43             | 20                    | 390    | 43476 | 5.6 | Polymerase I and transcript release factor                                                                                                                 |
| 864 | Q05DA4           | 7                    | 11             | 21                    | 504    | 57378 | 5.6 | P4HA2 protein                                                                                                                                              |
| 864 | Q5HYD8           | 7                    | 11             | 19.9                  | 533    | 60617 | 5.7 | Hypothetical protein DKFZp686M0919                                                                                                                         |
| 864 | O15460-2         | 7                    | 11             | 19.9                  | 533    | 60633 | 5.7 | Isoform IIa of O15460                                                                                                                                      |
| 864 | O15460           | 7                    | 11             | 19.8                  | 535    | 60902 | 5.7 | Prolyl 4-hydroxylase subunit alpha-2 precursor                                                                                                             |
| 865 | Q16630-3         | 7                    | 30             | 22.2                  | 478    | 52326 | 6.4 | Isoform 3 of Q16630                                                                                                                                        |
| 865 | Q16630           | 7                    | 30             | 19.2                  | 551    | 59210 | 7.2 | Cleavage and polyadenylation specificity factor 6                                                                                                          |
| 865 | UPI000006D566    | 7                    | 30             | 19.2                  | 551    | 59209 | 7.4 | cleavage and polyadenylation specific factor 6, 68 kD subunit                                                                                              |
| 865 | Q16630-2         | 7                    | 30             | 18                    | 588    | 63471 | 7.7 | Isoform 2 of Q16630                                                                                                                                        |
| 866 | Q8HXW2           | 7                    | 17             | 18.8                  | 674    | 74003 | 8.4 | Calcium-binding mitochondrial carrier protein Aralar2                                                                                                      |
| 867 | P22570           | 7                    | 14             | 18.5                  | 491    | 53837 | 8.4 | NADPH:adrenodoxin oxidoreductase, mitochondrial precursor (EC 1.18.1.2) (Adrenodoxin reductase) (AR) (Ferredoxin reductase) (Ferredoxin-NADP(+) reductase) |
| 867 | P22570-2         | 7                    | 14             | 18.3                  | 497    | 54479 | 8.4 | Isoform Long of P22570                                                                                                                                     |
| 868 | P18031           | 7                    | 8              | 18.4                  | 435    | 49967 | 6.3 | Tyrosine-protein phosphatase non-receptor type 1                                                                                                           |
| 869 | Q8TCT9-5         | 7                    | 90             | 20.6                  | 335    | 36814 | 6.7 | Isoform 5 of Q8TCT9                                                                                                                                        |
| 869 | Q8TCT9           | 7                    | 90             | 18.3                  | 377    | 41488 | 6.4 | Minor histocompatibility antigen H13                                                                                                                       |
| 870 | Q9BZZ5-3         | 7                    | 26             | 24.1                  | 373    | 42020 | 4.8 | Isoform 3 of Q9BZZ5                                                                                                                                        |
| 870 | Q9BZZ5-4         | 7                    | 26             | 18                    | 500    | 56099 | 5.9 | Isoform 4 of Q9BZZ5                                                                                                                                        |
| 870 | Q5R644           | 7                    | 26             | 17.9                  | 504    | 56770 | 5.9 | Apoptosis inhibitor 5                                                                                                                                      |
| 870 | Q9BZZ5           | 7                    | 26             | 17.6                  | 510    | 57561 | 6.1 | Apoptosis inhibitor 5                                                                                                                                      |
| 870 | UPI0000D625E5    | 7                    | 26             | 17.3                  | 521    | 58472 | 7.3 | Apoptosis inhibitor 5 (API-5) (Fibroblast growth factor 2-interacting factor) (FIF) (Protein XAGL) (Antiapoptosis clone 11 protein) (AAC- 11).             |
| 871 | Q9UMS4           | 7                    | 14             | 17.9                  | 504    | 55181 | 6.6 | Pre-mRNA-processing factor 19                                                                                                                              |
| 872 | Q8N2L6           | 7                    | 20             | 17.7                  | 447    | 49824 | 9.4 | CDNA FLJ90138 fis, clone HEMBB1000905, weakly similar to TRANSCRIPTIONAL REPRESSOR RCO-1                                                                   |
| 872 | Q9Y4P3           | 7                    | 20             | 17.7                  | 447    | 49798 | 9.4 | Transducin beta-like 2 protein                                                                                                                             |
| 873 | Q16843           | 7                    | 45             | 19.1                  | 460    | 52444 | 6.5 | Thromboxane synthase                                                                                                                                       |
| 873 | P24557           | 7                    | 45             | 16.5                  | 533    | 60544 | 7.6 | Thromboxane-A synthase                                                                                                                                     |
| 873 | UPI000006DC94    | 7                    | 45             | 16.5                  | 534    | 60676 | 7.6 | thromboxane A synthase 1 (platelet, cytochrome P450, family 5, subfamily A) isoform TXS-I                                                                  |
| 873 | Q53F23           | 7                    | 45             | 16.5                  | 534    | 60650 | 7.6 | Thromboxane A synthase 1 (Platelet, cytochrome P450, family 5, subfamily A) isoform TXS-I variant                                                          |

| No. | Accession Number | Unique Peptide Count | Spectrum Count | Sequence Coverage (%) | Length | MolWt | pI  | Descriptive Name                                                                   |
|-----|------------------|----------------------|----------------|-----------------------|--------|-------|-----|------------------------------------------------------------------------------------|
| 874 | Q9BRD2           | 7                    | 89             | 21.8                  | 308    | 33376 | 8.4 | LAMP1 protein                                                                      |
| 874 | P11279           | 7                    | 89             | 16.1                  | 416    | 44773 | 9.1 | Lysosome-associated membrane glycoprotein 1 precursor                              |
| 874 | UPI000049DDA7    | 7                    | 89             | 16.1                  | 415    | 44591 | 8.9 | Lysosome-associated membrane glycoprotein 1 precursor (LAMP-1) (CD107a antigen).   |
| 874 | Q8WU33           | 7                    | 89             | 16.1                  | 417    | 44882 | 8.7 | Lysosomal-associated membrane protein 1                                            |
| 875 | Q7Z4V5           | 7                    | 15             | 15.5                  | 671    | 74317 | 7.5 | Hepatoma-derived growth factor 2                                                   |
| 875 | Q9BW08           | 7                    | 15             | 15.5                  | 670    | 74230 | 7.5 | Hepatoma-derived growth factor-related protein 2                                   |
| 876 | Q8TAT6           | 7                    | 25             | 15.5                  | 608    | 68120 | 6.4 | Nuclear protein localization protein 4 homolog                                     |
| 876 | UPI0000D623AF    | 7                    | 25             | 15.5                  | 607    | 67987 | 6.4 | Nuclear protein localization protein 4 homolog (Protein NPL4).                     |
| 876 | UPI000006F9F7    | 7                    | 25             | 15.5                  | 608    | 68183 | 6.3 | nuclear protein localization 4                                                     |
| 876 | UPI0000D623B0    | 7                    | 25             | 15.3                  | 616    | 69360 | 6.7 | Nuclear protein localization protein 4 homolog (Protein NPL4).                     |
| 876 | Q8TAT6-2         | 7                    | 25             | 15.2                  | 617    | 69461 | 6.7 | Isoform 2 of Q8TAT6                                                                |
| 877 | Q2PZI1           | 7                    | 39             | 14.7                  | 675    | 77319 | 9   | Dpy-19-like protein 1                                                              |
| 877 | UPI0000DD7E92    | 7                    | 39             | 14.7                  | 675    | 77361 | 9   | PREDICTED: similar to dpy-19-like 1, like                                          |
| 878 | Q5JW30           | 7                    | 16             | 17                    | 494    | 54709 | 9.5 | Staufen, RNA binding protein, homolog 1                                            |
| 878 | O95793-2         | 7                    | 16             | 16.9                  | 496    | 54934 | 9.5 | Isoform Short of O95793                                                            |
| 878 | Q5JW29           | 7                    | 16             | 16.7                  | 502    | 55635 | 9.5 | Staufen, RNA binding protein, homolog 1                                            |
| 878 | O95793           | 7                    | 16             | 14.6                  | 577    | 63182 | 9.4 | Double-stranded RNA-binding protein Staufen homolog 1                              |
| 879 | UPI00005A4215    | 7                    | 12             | 16                    | 694    | 75927 | 6.6 | PREDICTED: similar to catenin (cadherin-associated protein), beta 1, 88kDa         |
| 879 | UPI00006C0700    | 7                    | 12             | 15.8                  | 702    | 77207 | 6.6 | PREDICTED: similar to Beta-catenin                                                 |
| 879 | UPI0000DD7B92    | 7                    | 12             | 14.3                  | 774    | 84766 | 5.9 | PREDICTED: similar to catenin (cadherin-associated protein), beta 1, 88kDa         |
| 879 | P35222           | 7                    | 12             | 14.2                  | 781    | 85497 | 5.9 | Catenin beta-1                                                                     |
| 880 | P55290           | 7                    | 15             | 14.2                  | 713    | 78287 | 5   | Cadherin-13 precursor                                                              |
| 881 | Q9Y6M1           | 7                    | 22             | 15.1                  | 556    | 61843 | 8.3 | Insulin-like growth factor 2 mRNA-binding protein 2                                |
| 881 | A0A4Z0           | 7                    | 22             | 14                    | 598    | 65990 | 8.5 | Insulin-like growth factor 2 mRNA binding protein 2                                |
| 882 | Q08945           | 7                    | 22             | 14                    | 709    | 81075 | 6.9 | FACT complex subunit SSRP1                                                         |
| 883 | P31040           | 7                    | 27             | 13.7                  | 664    | 72692 | 7.4 | Succinate dehydrogenase [ubiquinone] flavoprotein subunit, mitochondrial precursor |
| 884 | P17858           | 7                    | 8              | 13.6                  | 780    | 85018 | 7.5 | 6-phosphofructokinase, liver type                                                  |
| 885 | Q5JPR5           | 7                    | 18             | 19.4                  | 427    | 46610 | 8.8 | SH3-domain kinase binding protein 1                                                |
| 885 | Q5JPT5           | 7                    | 18             | 13.2                  | 628    | 68550 | 7.5 | SH3-domain kinase binding protein 1                                                |
| 885 | Q5JPR3           | 7                    | 18             | 12.9                  | 645    | 70443 | 8.6 | SH3-domain kinase binding protein 1                                                |
| 885 | Q96B97           | 7                    | 18             | 12.5                  | 665    | 73126 | 6.6 | SH3 domain-containing kinase-binding protein 1                                     |
| 886 | Q9NVI7-2         | 7                    | 16             | 12.6                  | 586    | 66218 | 9.2 | Isoform 2 of Q9NVI7                                                                |

| No. | Accession Number | Unique Peptide Count | Spectrum Count | Sequence Coverage (%) | Length | MolWt  | pI   | Descriptive Name                                                                                                                                                                                                                                          |
|-----|------------------|----------------------|----------------|-----------------------|--------|--------|------|-----------------------------------------------------------------------------------------------------------------------------------------------------------------------------------------------------------------------------------------------------------|
| 887 | O43747           | 7                    | 22             | 12                    | 822    | 91391  | 6.8  | AP-1 complex subunit gamma-1                                                                                                                                                                                                                              |
| 887 | UPI000016A4AD    | 7                    | 22             | 12                    | 825    | 91723  | 6.8  | adaptor-related protein complex 1, gamma 1 subunit isoform a                                                                                                                                                                                              |
| 887 | UPI000013E60C    | 7                    | 22             | 12                    | 822    | 91351  | 6.8  | adaptor-related protein complex 1, gamma 1 subunit isoform b                                                                                                                                                                                              |
| 887 | Q8IY97           | 7                    | 22             | 12                    | 825    | 91757  | 6.8  | Adaptor-related protein complex 1, gamma 1 subunit                                                                                                                                                                                                        |
| 888 | Q5T207           | 7                    | 40             | 12                    | 689    | 76744  | 5.7  | Nicastrin                                                                                                                                                                                                                                                 |
| 888 | Q92542           | 7                    | 40             | 11.7                  | 709    | 78411  | 6    | Nicastrin precursor                                                                                                                                                                                                                                       |
| 889 | Q9GZR7           | 7                    | 10             | 10.1                  | 859    | 96332  | 9.1  | ATP-dependent RNA helicase DDX24                                                                                                                                                                                                                          |
| 890 | P13591           | 7                    | 15             | 9.6                   | 848    | 93361  | 4.9  | Neural cell adhesion molecule 1, 140 kDa isoform precursor                                                                                                                                                                                                |
| 890 | UPI0000E445E3    | 7                    | 15             | 9.4                   | 858    | 94574  | 4.9  | neural cell adhesion molecule 1 isoform 2                                                                                                                                                                                                                 |
| 890 | Q86X47           | 7                    | 15             | 9.4                   | 858    | 94601  | 4.9  | Neural cell adhesion molecule 1                                                                                                                                                                                                                           |
| 891 | Q13620           | 7                    | 17             | 9.6                   | 895    | 102299 | 7.9  | Cullin-4B                                                                                                                                                                                                                                                 |
| 891 | UPI000059DB7F    | 7                    | 17             | 9.6                   | 900    | 102756 | 8    | Cullin-4B (CUL-4B).                                                                                                                                                                                                                                       |
| 891 | UPI0000457880    | 7                    | 17             | 9.4                   | 917    | 104645 | 8    | Cullin-4B (CUL-4B).                                                                                                                                                                                                                                       |
| 891 | Q5JRZ4           | 7                    | 17             | 9.4                   | 913    | 103982 | 7.4  | Cullin 4B                                                                                                                                                                                                                                                 |
| 892 | Q53X12           | 7                    | 14             | 9.6                   | 831    | 95751  | 6.7  | Vacuolar-type H(+)-ATPase                                                                                                                                                                                                                                 |
| 892 | UPI0000D62334    | 7                    | 14             | 9.6                   | 837    | 96477  | 6.7  | Vacuolar proton translocating ATPase 116 kDa subunit a isoform 1 (V-ATPase 116 kDa isoform a1) (Clathrin-coated vesicle/synaptic vesicle proton pump 116 kDa subunit) (Vacuolar proton pump subunit 1) (Vacuolar adenosine triphosphatase subunit Ac116). |
| 892 | Q93050-1         | 7                    | 14             | 9.6                   | 831    | 95756  | 6.7  | Isoform 2 of Q93050                                                                                                                                                                                                                                       |
| 892 | Q93050           | 7                    | 14             | 9.6                   | 837    | 96413  | 6.4  | Vacuolar proton translocating ATPase 116 kDa subunit a isoform 1                                                                                                                                                                                          |
| 892 | Q5CZH6           | 7                    | 14             | 9.5                   | 838    | 96603  | 6.6  | Hypothetical protein DKFZp686N0561                                                                                                                                                                                                                        |
| 893 | UPI0000456E7C    | 7                    | 13             | 10.2                  | 827    | 95332  | 7.5  | Pre-mRNA-processing factor 40 homolog A (Formin-binding protein 3) (Formin-binding protein 11) (Huntingtin-interacting protein HYPA) (Huntingtin yeast partner A) (Fas ligand-associated factor 1) (NY-REN- 6 antigen).                                   |
| 893 | O75400-2         | 7                    | 13             | 9.2                   | 915    | 104363 | 7.6  | Isoform 2 of O75400                                                                                                                                                                                                                                       |
| 893 | O75400-3         | 7                    | 13             | 8.9                   | 939    | 106907 | 7.4  | Isoform 3 of O75400                                                                                                                                                                                                                                       |
| 893 | O75400           | 7                    | 13             | 8.8                   | 957    | 108805 | 7.6  | Pre-mRNA-processing factor 40 homolog A                                                                                                                                                                                                                   |
| 893 | UPI0000DD7A6A    | 7                    | 13             | 8.6                   | 974    | 110497 | 8.2  | PREDICTED: similar to Pre-mRNA-processing factor 40 homolog A (Formin-binding protein 3) (Huntingtin yeast partner A) (Huntingtin-interacting protein HYPA/FP11) (Fas ligand-associated factor 1) (NY-REN-6 antigen) isoform 1                            |
| 894 | UPI000013FCDE    | 7                    | 13             | 9                     | 808    | 89467  | 10.1 | arginine/proline rich coiled-coil 1                                                                                                                                                                                                                       |

| No. | Accession Number | Unique Peptide Count | Spectrum Count | Sequence Coverage (%) | Length | MolWt  | pI   | Descriptive Name                                                                             |
|-----|------------------|----------------------|----------------|-----------------------|--------|--------|------|----------------------------------------------------------------------------------------------|
| 894 | Q3KQU3           | 7                    | 13             | 8.7                   | 841    | 92820  | 10.1 | Arginine/proline-rich coiled-coil protein 1                                                  |
| 895 | Q5JTH9           | 7                    | 27             | 8.5                   | 1297   | 143702 | 8.8  | RRP12-like protein                                                                           |
| 895 | UPI00000712A5    | 7                    | 27             | 8.5                   | 1297   | 143732 | 8.8  | ribosomal RNA processing 12 homolog                                                          |
| 896 | Q9P0K7           | 7                    | 12             | 8.5                   | 980    | 110041 | 6.2  | Ankyrin                                                                                      |
| 896 | UPI0000074005    | 7                    | 12             | 8.5                   | 980    | 110042 | 6.2  | retinoic acid induced 14                                                                     |
| 896 | Q9P0K7-3         | 7                    | 12             | 8.5                   | 972    | 109080 | 6    | Isoform 3 of Q9P0K7                                                                          |
| 896 | Q9P0K7-2         | 7                    | 12             | 8.4                   | 983    | 110423 | 6.1  | Isoform 2 of Q9P0K7                                                                          |
| 897 | Q14157-1         | 7                    | 17             | 9.2                   | 983    | 103930 | 7    | Isoform 2 of Q14157                                                                          |
| 897 | Q14157-3         | 7                    | 17             | 8.4                   | 1068   | 112580 | 6.6  | Isoform 3 of Q14157                                                                          |
| 897 | Q14157           | 7                    | 17             | 8.3                   | 1087   | 114534 | 7.1  | Ubiquitin-associated protein 2-like                                                          |
| 897 | UPI00000735C4    | 7                    | 17             | 8.3                   | 1087   | 114543 | 7.1  | ubiquitin associated protein 2-like                                                          |
| 898 | UPI0000457885    | 7                    | 12             | 8.2                   | 1231   | 141328 | 5.4  | Cohesin subunit SA-2 (Stromal antigen 2) (SCC3 homolog 2).                                   |
| 898 | Q8N3U4           | 7                    | 12             | 8.2                   | 1231   | 141326 | 5.4  | Cohesin subunit SA-2                                                                         |
| 898 | Q6MZM4           | 7                    | 12             | 8.2                   | 1231   | 141306 | 5.4  | Hypothetical protein DKFZp686P16143                                                          |
| 898 | Q6MZM3           | 7                    | 12             | 8.2                   | 1231   | 141301 | 5.4  | Hypothetical protein DKFZp686C21148                                                          |
| 898 | Q5JT15           | 7                    | 12             | 8                     | 1268   | 145751 | 5.5  | Stromal antigen 2                                                                            |
| 898 | UPI0000D61DCF    | 7                    | 12             | 8                     | 1268   | 145753 | 5.5  | Cohesin subunit SA-2 (Stromal antigen 2) (SCC3 homolog 2).                                   |
| 898 | Q6MZP3           | 7                    | 12             | 8                     | 1268   | 145675 | 5.5  | Hypothetical protein DKFZp686I05169                                                          |
| 898 | Q68DE9           | 7                    | 12             | 8                     | 1268   | 145781 | 5.5  | Hypothetical protein DKFZp781H1753                                                           |
| 899 | Q6P2E9           | 7                    | 13             | 8                     | 1401   | 151661 | 5.9  | Enhancer of mRNA-decapping protein 4                                                         |
| 900 | Q01970           | 7                    | 16             | 7.9                   | 1234   | 138799 | 5.9  | 1-phosphatidylinositol-4,5-bisphosphate phosphodiesterase beta 3                             |
| 901 | Q7Z406           | 7                    | 35             | 7.5                   | 1995   | 228000 | 5.9  | Myosin-14                                                                                    |
| 901 | UPI0000E59250    | 7                    | 35             | 7.5                   | 2003   | 228663 | 5.6  | myosin, heavy chain 14 isoform 1                                                             |
| 901 | UPI0000E5924F    | 7                    | 35             | 7.5                   | 1995   | 227868 | 5.6  | myosin, heavy chain 14 isoform 2                                                             |
| 901 | Q7Z406-2         | 7                    | 35             | 7.4                   | 2028   | 231214 | 5.6  | Isoform 2 of Q7Z406                                                                          |
| 902 | Q4KMR3           | 7                    | 15             | 7.1                   | 1108   | 127062 | 8.9  | Myosin IE                                                                                    |
| 903 | Q7L014           | 7                    | 8              | 7.1                   | 1031   | 117362 | 9.3  | Probable ATP-dependent RNA helicase DDX46                                                    |
| 903 | UPI0000457348    | 7                    | 8              | 7.1                   | 1032   | 117462 | 9.3  | Probable ATP-dependent RNA helicase DDX46 (EC 3.6.1.-) (DEAD box protein 46) (PRP5 homolog). |
| 903 | UPI0000457347    | 7                    | 8              | 7.1                   | 1033   | 117575 | 9.3  | Probable ATP-dependent RNA helicase DDX46 (EC 3.6.1.-) (DEAD box protein 46) (PRP5 homolog). |
| 904 | UPI0000D6250D    | 7                    | 9              | 8.2                   | 878    | 99204  | 6.4  | Focal adhesion kinase 1 (EC 2.7.10.2) (FADK 1) (pp125FAK) (Protein- tyrosine kinase 2).      |
| 904 | Q05397-2         | 7                    | 9              | 8.2                   | 879    | 99358  | 6.4  | Isoform 2 of Q05397                                                                          |
| 904 | Q59GN8           | 7                    | 9              | 7.4                   | 975    | 110234 | 6.2  | PTK2 protein tyrosine kinase 2 isoform b variant                                             |
| 904 | Q8IYN9           | 7                    | 9              | 7.2                   | 1006   | 114253 | 6.8  | PTK2 protein                                                                                 |
| 904 | Q59GM6           | 7                    | 9              | 7.1                   | 1007   | 114157 | 6.6  | PTK2 protein tyrosine kinase 2 isoform b variant                                             |
| 904 | Q05397           | 7                    | 9              | 6.8                   | 1052   | 119233 | 6.6  | Focal adhesion kinase 1                                                                      |
| 905 | Q14692           | 7                    | 16             | 6.1                   | 1282   | 145807 | 6.4  | Ribosome biogenesis protein BMS1 homolog                                                     |

| No. | Accession Number | Unique Peptide Count | Spectrum Count | Sequence Coverage (%) | Length | MolWt  | pI   | Descriptive Name                                                                                                                                                                                                         |
|-----|------------------|----------------------|----------------|-----------------------|--------|--------|------|--------------------------------------------------------------------------------------------------------------------------------------------------------------------------------------------------------------------------|
| 905 | UPI000000DA33    | 7                    | 16             | 6.1                   | 1282   | 145821 | 6.4  | BMS1-like, ribosome assembly protein                                                                                                                                                                                     |
| 906 | Q59GJ0           | 7                    | 23             | 6.1                   | 1780   | 195956 | 5.6  | Eukaryotic translation initiation factor 4 gamma, 3 variant                                                                                                                                                              |
| 907 | Q08378-3         | 7                    | 14             | 6.1                   | 1458   | 162985 | 5.4  | Isoform 3 of Q08378                                                                                                                                                                                                      |
| 907 | Q08378           | 7                    | 14             | 5.9                   | 1498   | 167354 | 5.4  | Golgin subfamily A member 3                                                                                                                                                                                              |
| 908 | Q9UIG0           | 7                    | 7              | 5.9                   | 1483   | 170902 | 8.5  | Bromodomain adjacent to zinc finger domain protein 1B                                                                                                                                                                    |
| 908 | Q9UIG0-2         | 7                    | 7              | 5.9                   | 1479   | 170446 | 8.5  | Isoform 2 of Q9UIG0                                                                                                                                                                                                      |
| 909 | Q9P2D5           | 7                    | 22             | 5.8                   | 1386   | 154717 | 8.1  | Transmembrane protein 2                                                                                                                                                                                                  |
| 910 | UPI0000D612FA    | 7                    | 13             | 5.7                   | 1676   | 187847 | 6.7  | Tight junction protein ZO-1 (Zonula occludens 1 protein) (Zona occludens 1 protein) (Tight junction protein 1).                                                                                                          |
| 910 | Q07157-2         | 7                    | 13             | 5.7                   | 1668   | 186965 | 6.8  | Isoform Short of Q07157                                                                                                                                                                                                  |
| 910 | Q6MZU1           | 7                    | 13             | 5.6                   | 1692   | 189616 | 6.8  | Hypothetical protein DKFZp686A1195                                                                                                                                                                                       |
| 910 | UPI0000D612F9    | 7                    | 13             | 5.5                   | 1736   | 194834 | 6.8  | Tight junction protein ZO-1 (Zonula occludens 1 protein) (Zona occludens 1 protein) (Tight junction protein 1).                                                                                                          |
| 910 | Q07157           | 7                    | 13             | 5.4                   | 1748   | 195457 | 6.7  | Tight junction protein ZO-1                                                                                                                                                                                              |
| 911 | P52948           | 7                    | 8              | 4.5                   | 1729   | 187789 | 6.3  | Nuclear pore complex protein Nup98-Nup96 precursor [Contains: Nuclear pore complex protein Nup98 (Nucleoporin Nup98) (98 kDa nucleoporin); Nuclear pore complex protein Nup96 (Nucleoporin Nup96) (96 kDa nucleoporin)]  |
| 911 | UPI0000D62592    | 7                    | 8              | 4.5                   | 1729   | 187780 | 6.4  | Nuclear pore complex protein Nup98-Nup96 precursor [Contains: Nuclear pore complex protein Nup98 (Nucleoporin Nup98) (98 kDa nucleoporin); Nuclear pore complex protein Nup96 (Nucleoporin Nup96) (96 kDa nucleoporin)]. |
| 911 | P52948-5         | 7                    | 8              | 4.3                   | 1800   | 195816 | 6.4  | Isoform 5 of P52948                                                                                                                                                                                                      |
| 912 | P24928           | 7                    | 9              | 4.2                   | 1970   | 217204 | 7.4  | DNA-directed RNA polymerase II largest subunit                                                                                                                                                                           |
| 912 | UPI0000D622B7    | 7                    | 9              | 4.2                   | 1972   | 217430 | 7.4  | DNA-directed RNA polymerase II largest subunit (EC 2.7.7.6) (RPB1).                                                                                                                                                      |
| 912 | UPI0000140EB9    | 7                    | 9              | 4.2                   | 1970   | 217174 | 7.4  | DNA-directed RNA polymerase II largest subunit (EC 2.7.7.6) (RPB1).                                                                                                                                                      |
| 913 | Q6IEH8           | 7                    | 21             | 2.9                   | 2804   | 316066 | 7.9  | Transcriptional regulator                                                                                                                                                                                                |
| 913 | Q6KC79           | 7                    | 21             | 2.9                   | 2804   | 316051 | 7.9  | Nipped-B-like protein                                                                                                                                                                                                    |
| 914 | Q8WUH6           | 6                    | 26             | 79.3                  | 116    | 11748  | 9.3  | Uncharacterized protein C12orf23                                                                                                                                                                                         |
| 915 | P58546           | 6                    | 92             | 66.9                  | 118    | 12895  | 5.5  | Myotrophin                                                                                                                                                                                                               |
| 916 | P41567           | 6                    | 41             | 61.1                  | 113    | 12732  | 7.5  | Eukaryotic translation initiation factor 1                                                                                                                                                                               |
| 917 | P31946-2         | 6                    | 79             | 59.4                  | 244    | 27850  | 4.8  | Isoform Short of P31946                                                                                                                                                                                                  |
| 917 | P31946           | 6                    | 79             | 58.9                  | 246    | 28082  | 4.8  | 14-3-3 protein beta/alpha                                                                                                                                                                                                |
| 918 | P09669           | 6                    | 34             | 58.7                  | 75     | 8781   | 10.4 | Cytochrome c oxidase polypeptide Vc precursor                                                                                                                                                                            |
| 919 | O75531           | 6                    | 69             | 56.2                  | 89     | 10059  | 6.1  | Barrier-to-autointegration factor                                                                                                                                                                                        |
| 920 | P49773           | 6                    | 45             | 55.6                  | 126    | 13802  | 7    | Histidine triad nucleotide-binding protein 1                                                                                                                                                                             |
| 921 | P99999           | 6                    | 110            | 55.2                  | 105    | 11749  | 9.6  | Cytochrome c                                                                                                                                                                                                             |

| No. | Accession Number | Unique Peptide Count | Spectrum Count | Sequence Coverage (%) | Length | MolWt | pI   | Descriptive Name                                              |
|-----|------------------|----------------------|----------------|-----------------------|--------|-------|------|---------------------------------------------------------------|
| 922 | Q99471           | 6                    | 31             | 55.2                  | 154    | 17328 | 6.3  | Prefoldin subunit 5                                           |
| 923 | Q53HV6           | 6                    | 56             | 50.3                  | 151    | 16584 | 7.7  | Niemann-Pick disease, type C2 variant                         |
| 924 | P63173           | 6                    | 88             | 50                    | 70     | 8218  | 10.1 | 60S ribosomal protein L38                                     |
| 925 | Q04837           | 6                    | 88             | 49.3                  | 148    | 17260 | 9.6  | Single-stranded DNA-binding protein, mitochondrial precursor  |
| 925 | Q567R6           | 6                    | 88             | 49.3                  | 148    | 17359 | 9.7  | Single-stranded DNA binding protein 1                         |
| 926 | Q9P0J0           | 6                    | 29             | 49.3                  | 144    | 16698 | 8.4  | NADH dehydrogenase [ubiquinone] 1 alpha subcomplex subunit 13 |
| 926 | UPI0000163BED    | 6                    | 29             | 31.3                  | 227    | 25865 | 9.8  | cell death-regulatory protein GRIM19                          |
| 927 | P62316           | 6                    | 93             | 49.2                  | 118    | 13527 | 9.9  | Small nuclear ribonucleoprotein Sm D2                         |
| 928 | P61088           | 6                    | 52             | 48.7                  | 152    | 17138 | 6.6  | Ubiquitin-conjugating enzyme E2 N                             |
| 929 | P68133           | 6                    | 154            | 48.3                  | 377    | 42051 | 5.4  | Actin, alpha skeletal muscle                                  |
| 930 | P30050           | 6                    | 155            | 47.9                  | 165    | 17819 | 9.4  | 60S ribosomal protein L12                                     |
| 930 | UPI0000D6190D    | 6                    | 155            | 34.5                  | 229    | 24724 | 9.9  | 60S ribosomal protein L12.                                    |
| 931 | O75964           | 6                    | 83             | 47.6                  | 103    | 11428 | 9.6  | ATP synthase subunit g, mitochondrial                         |
| 932 | P40616           | 6                    | 35             | 47                    | 181    | 20418 | 5.7  | ADP-ribosylation factor-like protein 1                        |
| 933 | P84095           | 6                    | 8              | 46.1                  | 191    | 21308 | 8.1  | Rho-related GTP-binding protein RhoG precursor                |
| 934 | Q9Y221           | 6                    | 16             | 45.6                  | 180    | 20463 | 8.5  | 60S ribosome subunit biogenesis protein NIP7 homolog          |
| 935 | P57105           | 6                    | 24             | 45.5                  | 145    | 15928 | 6.3  | Synaptojanin-2-binding protein                                |
| 936 | Q9Y5S9           | 6                    | 40             | 45.4                  | 174    | 19889 | 5.7  | RNA-binding protein 8A                                        |
| 937 | O15511           | 6                    | 62             | 45                    | 151    | 16320 | 5.7  | Actin-related protein 2/3 complex subunit 5                   |
| 938 | Q15370           | 6                    | 47             | 44.9                  | 118    | 13133 | 4.9  | Transcription elongation factor B polypeptide 2               |
| 938 | UPI0000353500    | 6                    | 47             | 32.9                  | 161    | 17911 | 6.1  | elongin B isoform b                                           |
| 939 | Q9BTQ7           | 6                    | 222            | 46.3                  | 134    | 14150 | 10.3 | Similar to ribosomal protein L23                              |
| 939 | P62829           | 6                    | 222            | 44.3                  | 140    | 14865 | 10.5 | 60S ribosomal protein L23                                     |
| 939 | UPI0000D62314    | 6                    | 222            | 44.3                  | 140    | 14811 | 10.4 | 60S ribosomal protein L23 (Ribosomal protein L17).            |
| 940 | P13693           | 6                    | 75             | 44.2                  | 172    | 19595 | 4.9  | Translationally-controlled tumor protein                      |
| 941 | Q4VBQ4           | 6                    | 33             | 42.9                  | 140    | 15088 | 6.1  | Profilin 2                                                    |
| 942 | Q8CFN2           | 6                    | 48             | 42.4                  | 191    | 21259 | 6.5  | Cell division control protein 42 homolog precursor            |
| 942 | UPI0000EFE353    | 6                    | 48             | 42.2                  | 192    | 21346 | 6.5  | Human Cell Division Cycle 42 (CDC42)                          |
| 943 | P60983           | 6                    | 24             | 42.3                  | 142    | 16713 | 5.3  | Glia maturation factor beta                                   |
| 943 | Q9BS35           | 6                    | 24             | 39                    | 154    | 18110 | 5.3  | GMFB protein                                                  |
| 944 | O43324           | 6                    | 14             | 42                    | 174    | 19811 | 8.6  | Eukaryotic translation elongation factor 1 epsilon-1          |
| 945 | Q8TED1           | 6                    | 30             | 41.1                  | 209    | 23909 | 9.4  | CDNA FLJ23636 fis, clone CAS07176                             |
| 946 | Q03135           | 6                    | 233            | 41                    | 178    | 20472 | 6    | Caveolin-1                                                    |
| 947 | Q9BYC9           | 6                    | 16             | 40.9                  | 149    | 17443 | 10.9 | 39S ribosomal protein L20, mitochondrial precursor            |
| 948 | O00264           | 6                    | 17             | 40.5                  | 195    | 21671 | 4.7  | Membrane-associated progesterone receptor component 1         |
| 949 | A3KQT0           | 6                    | 95             | 39.8                  | 201    | 23072 | 10   | Ribosomal protein L10                                         |
| 949 | Q6ZVV3           | 6                    | 95             | 37.4                  | 214    | 24604 | 10.1 | 60S ribosomal protein L10                                     |
| 949 | Q53FH7           | 6                    | 95             | 37.4                  | 214    | 24543 | 10.1 | Ribosomal protein L10 variant                                 |



| No. | Accession Number | Unique Peptide Count | Spectrum Count | Sequence Coverage (%) | Length | MolWt | pI   | Descriptive Name                                                                                                      |
|-----|------------------|----------------------|----------------|-----------------------|--------|-------|------|-----------------------------------------------------------------------------------------------------------------------|
| 949 | P27635           | 6                    | 95             | 37.4                  | 214    | 24577 | 10.1 | 60S ribosomal protein L10                                                                                             |
| 949 | Q5HY50           | 6                    | 95             | 34.8                  | 230    | 26593 | 10.2 | Ribosomal protein L10                                                                                                 |
| 950 | P21291           | 6                    | 21             | 39.4                  | 193    | 20567 | 8.6  | Cysteine and glycine-rich protein 1                                                                                   |
| 951 | P13073           | 6                    | 61             | 38.5                  | 169    | 19577 | 9.5  | Cytochrome c oxidase subunit 4 isoform 1, mitochondrial precursor                                                     |
| 951 | Q6P666           | 6                    | 61             | 38.5                  | 169    | 19607 | 9.5  | Cytochrome c oxidase subunit IV isoform 1                                                                             |
| 952 | P49720           | 6                    | 63             | 38.5                  | 205    | 22949 | 6.5  | Proteasome subunit beta type 3                                                                                        |
| 953 | P61086           | 6                    | 19             | 38.5                  | 200    | 22407 | 5.4  | Ubiquitin-conjugating enzyme E2-25 kDa (EC 6.3.2.19) (Ubiquitin-protein ligase) (Ubiquitin carrier protein) (E2(25K)) |
| 954 | UPI0000251F42    | 6                    | 59             | 38.7                  | 124    | 13614 | 10.1 | PREDICTED: similar to 40S ribosomal protein S25                                                                       |
| 954 | UPI000013DA0C    | 6                    | 59             | 38.7                  | 124    | 13615 | 10   | PREDICTED: similar to 40S ribosomal protein S25                                                                       |
| 954 | P62851           | 6                    | 59             | 38.4                  | 125    | 13742 | 10.1 | 40S ribosomal protein S25                                                                                             |
| 955 | P02794           | 6                    | 40             | 37.7                  | 183    | 21226 | 5.6  | Ferritin heavy chain                                                                                                  |
| 955 | UPI0000EB65CC    | 6                    | 40             | 37.7                  | 183    | 21198 | 5.4  | FERRITIN HEAVY CHAIN                                                                                                  |
| 955 | UPI0000EB65CB    | 6                    | 40             | 37.7                  | 183    | 21212 | 5.4  | FERRITIN HEAVY CHAIN                                                                                                  |
| 955 | UPI0000EB65CA    | 6                    | 40             | 37.7                  | 183    | 21212 | 5.4  | FERRITIN HEAVY CHAIN                                                                                                  |
| 955 | Q6NZ44           | 6                    | 40             | 37.7                  | 183    | 21242 | 5.3  | FTH1 protein                                                                                                          |
| 955 | UPI0000D62618    | 6                    | 40             | 28.3                  | 244    | 27725 | 7    | Ferritin heavy chain (EC 1.16.3.1) (Ferritin H subunit) (Proliferation-inducing gene 15 protein).                     |
| 956 | P52943           | 6                    | 11             | 37.5                  | 208    | 22493 | 8.7  | Cysteine-rich protein 2                                                                                               |
| 956 | Q53FN1           | 6                    | 11             | 37.5                  | 208    | 22494 | 8.5  | Cysteine-rich protein 2 variant                                                                                       |
| 957 | Q15185           | 6                    | 54             | 37.5                  | 160    | 18697 | 4.5  | Prostaglandin E synthase 3                                                                                            |
| 958 | Q9BYD1           | 6                    | 11             | 37.1                  | 178    | 20692 | 9.1  | 39S ribosomal protein L13, mitochondrial                                                                              |
| 959 | UPI0000EFE339    | 6                    | 27             | 37.2                  | 180    | 20639 | 7.8  | NEDD8-conjugating enzyme Ubc12                                                                                        |
| 959 | P61081           | 6                    | 27             | 36.6                  | 183    | 20900 | 7.7  | NEDD8-conjugating enzyme Ubc12                                                                                        |
| 960 | P28070           | 6                    | 26             | 36.4                  | 264    | 29204 | 6    | Proteasome subunit beta type 4 precursor                                                                              |
| 960 | Q6IBI4           | 6                    | 26             | 36.4                  | 264    | 29190 | 6    | Proteasome subunit beta type                                                                                          |
| 961 | P83731           | 6                    | 63             | 35.7                  | 157    | 17779 | 11.3 | 60S ribosomal protein L24                                                                                             |
| 962 | P63208           | 6                    | 33             | 35.6                  | 163    | 18658 | 4.5  | S-phase kinase-associated protein 1A                                                                                  |
| 963 | P46778           | 6                    | 48             | 35                    | 160    | 18565 | 10.5 | 60S ribosomal protein L21                                                                                             |
| 963 | Q59GK9           | 6                    | 48             | 34.4                  | 163    | 18891 | 10.5 | Ribosomal protein L21 variant                                                                                         |
| 964 | P37108           | 6                    | 35             | 34.6                  | 136    | 14570 | 10   | Signal recognition particle 14 kDa protein                                                                            |
| 964 | Q96Q14           | 6                    | 35             | 34.6                  | 136    | 14514 | 10   | Signal recognition particle 14kD                                                                                      |
| 965 | P05090           | 6                    | 20             | 34.4                  | 189    | 21276 | 5.1  | Apolipoprotein D precursor                                                                                            |
| 966 | Q15126           | 6                    | 22             | 34.4                  | 192    | 21995 | 5.7  | Phosphomevalonate kinase                                                                                              |
| 967 | Q9H061           | 6                    | 10             | 34.4                  | 195    | 21527 | 9.3  | Transmembrane protein 126A                                                                                            |
| 968 | UPI000046D37E    | 6                    | 14             | 34.9                  | 292    | 31762 | 7.5  | syntenin isoform 2                                                                                                    |
| 968 | O00560           | 6                    | 14             | 34.2                  | 298    | 32444 | 7.5  | Syntenin-1                                                                                                            |
| 969 | Q13257           | 6                    | 14             | 33.7                  | 205    | 23510 | 5.1  | Mitotic spindle assembly checkpoint protein MAD2A                                                                     |
| 969 | Q6IRW7           | 6                    | 14             | 33.7                  | 205    | 23496 | 5.1  | MAD2 mitotic arrest deficient-like 1                                                                                  |
| 969 | Q53F56           | 6                    | 14             | 33.7                  | 205    | 23526 | 5.1  | MAD2-like 1 variant                                                                                                   |
| 970 | Q9HAV7           | 6                    | 16             | 33.6                  | 217    | 24279 | 8.1  | GrpE protein homolog 1, mitochondrial precursor                                                                       |

| No. | Accession Number | Unique Peptide Count | Spectrum Count | Sequence Coverage (%) | Length | MolWt | pI   | Descriptive Name                                                                         |
|-----|------------------|----------------------|----------------|-----------------------|--------|-------|------|------------------------------------------------------------------------------------------|
| 971 | O75223           | 6                    | 26             | 33.5                  | 188    | 21008 | 5.1  | Uncharacterized protein C7orf24                                                          |
| 972 | Q08ES8           | 6                    | 57             | 33.3                  | 177    | 20094 | 9.6  | Cell growth-inhibiting protein 34                                                        |
| 972 | P62913-2         | 6                    | 57             | 33.3                  | 177    | 20124 | 9.6  | Isoform 2 of P62913                                                                      |
| 972 | P62913           | 6                    | 57             | 33.1                  | 178    | 20252 | 9.6  | 60S ribosomal protein L11                                                                |
| 973 | UPI000015B7BA    | 6                    | 23             | 32.9                  | 210    | 24611 | 6    | DNA directed RNA polymerase II polypeptide E                                             |
| 974 | P18621           | 6                    | 95             | 32.6                  | 184    | 21397 | 10.2 | 60S ribosomal protein L17                                                                |
| 974 | Q6NZ54           | 6                    | 95             | 32.6                  | 184    | 21416 | 10.2 | Ribosomal protein L17                                                                    |
| 974 | UPI0000456877    | 6                    | 95             | 32.4                  | 185    | 21441 | 10.1 | 60S ribosomal protein L17 (L23).                                                         |
| 975 | Q9GZZ1           | 6                    | 47             | 32.5                  | 169    | 19398 | 8.8  | N-acetyltransferase 13                                                                   |
| 976 | Q85KS8           | 6                    | 44             | 32.2                  | 227    | 25566 | 4.8  | Cytochrome oxidase subunit II                                                            |
| 977 | Q00688           | 6                    | 34             | 31.2                  | 224    | 25177 | 9.3  | FK506-binding protein 3                                                                  |
| 977 | Q53GD8           | 6                    | 34             | 31.2                  | 224    | 25204 | 9.4  | FK506-binding protein 3 variant                                                          |
| 978 | P41227           | 6                    | 9              | 30.2                  | 235    | 26458 | 5.6  | N-terminal acetyltransferase complex ARD1 subunit homolog A                              |
| 979 | P62266           | 6                    | 78             | 30.1                  | 143    | 15808 | 10.5 | 40S ribosomal protein S23                                                                |
| 979 | UPI00005E9ED6    | 6                    | 78             | 30.1                  | 143    | 15790 | 10.5 | 40S ribosomal protein S23.                                                               |
| 980 | P35625           | 6                    | 19             | 29.9                  | 211    | 24145 | 8.7  | Metalloproteinase inhibitor 3 precursor                                                  |
| 980 | Q9TUL9           | 6                    | 19             | 29.9                  | 211    | 24147 | 8.7  | Metalloproteinase inhibitor 3 precursor                                                  |
| 981 | Q59G46           | 6                    | 13             | 30.7                  | 280    | 31355 | 4.8  | Thioredoxin-like 1 variant                                                               |
| 981 | O43396           | 6                    | 13             | 29.8                  | 289    | 32251 | 5    | Thioredoxin-like protein 1                                                               |
| 982 | Q01105-2         | 6                    | 43             | 29.2                  | 277    | 32103 | 4.2  | Isoform 2 of Q01105                                                                      |
| 982 | UPI0000161B37    | 6                    | 43             | 29.2                  | 277    | 32134 | 4.2  | SET translocation (myeloid leukemia-associated)                                          |
| 983 | Q9H3H0           | 6                    | 9              | 29.1                  | 247    | 28275 | 9.4  | Vacuolar ATP synthase subunit D homolog                                                  |
| 983 | Q9Y5K8           | 6                    | 9              | 29.1                  | 247    | 28263 | 9.4  | Vacuolar ATP synthase subunit D                                                          |
| 984 | P16989-3         | 6                    | 14             | 31.6                  | 342    | 37021 | 9.9  | Isoform 3 of P16989                                                                      |
| 984 | P16989           | 6                    | 14             | 29                    | 372    | 40090 | 9.8  | DNA-binding protein A                                                                    |
| 984 | UPI0000128F30    | 6                    | 14             | 29                    | 372    | 40060 | 9.8  | cold shock domain protein A                                                              |
| 985 | Q6IAX4           | 6                    | 37             | 28.8                  | 208    | 23562 | 8.9  | RTN1 protein                                                                             |
| 985 | Q9BQ59           | 6                    | 37             | 28.8                  | 208    | 23576 | 8.9  | Reticulon 1                                                                              |
| 986 | UPI000002552E    | 6                    | 47             | 28.7                  | 216    | 24700 | 9.9  | 60S ribosomal protein L10a (CSA-19).                                                     |
| 986 | P62906           | 6                    | 47             | 28.6                  | 217    | 24831 | 9.9  | 60S ribosomal protein L10a                                                               |
| 987 | Q04760           | 6                    | 48             | 28.3                  | 184    | 20778 | 5.3  | Lactoylglutathione lyase                                                                 |
| 988 | P29218           | 6                    | 17             | 28.2                  | 277    | 30189 | 5.3  | Inositol monophosphatase (EC 3.1.3.25) (IMPase) (IMP) (Inositol-1(or 4)-monophosphatase) |
| 989 | Q13637           | 6                    | 25             | 28                    | 225    | 24997 | 6.5  | Ras-related protein Rab-32                                                               |
| 990 | Q9BSQ6           | 6                    | 33             | 27.9                  | 201    | 23375 | 10.9 | RPL13A protein                                                                           |
| 990 | P40429           | 6                    | 33             | 27.6                  | 203    | 23577 | 10.9 | 60S ribosomal protein L13a                                                               |
| 990 | UPI000013DB4D    | 6                    | 33             | 27.6                  | 203    | 23619 | 10.9 | PREDICTED: similar to ribosomal protein L13a isoform 1                                   |
| 990 | Q5QTS3           | 6                    | 33             | 27.6                  | 203    | 23662 | 11   | FWP004                                                                                   |
| 990 | Q53H34           | 6                    | 33             | 27.6                  | 203    | 23558 | 10.9 | Ribosomal protein L13a variant                                                           |
| 991 | Q96C19           | 6                    | 29             | 27.5                  | 240    | 26697 | 5.2  | EF-hand domain-containing protein 2                                                      |
| 992 | Q5T429           | 6                    | 27             | 27.3                  | 242    | 26279 | 8.9  | Guanylate kinase 1                                                                       |
| 993 | P27105           | 6                    | 22             | 27.1                  | 288    | 31731 | 7.9  | Erythrocyte band 7 integral membrane protein                                             |
| 994 | Q8N5D1           | 6                    | 26             | 27                    | 230    | 27086 | 10.3 | MRPL47 protein                                                                           |
| 994 | UPI000013D022    | 6                    | 26             | 24.8                  | 250    | 29450 | 10.4 | mitochondrial ribosomal protein L47 isoform a                                            |

| No.  | Accession Number | Unique Peptide Count | Spectrum Count | Sequence Coverage (%) | Length | MolWt | pI   | Descriptive Name                                                                                                                                                                                                                                               |
|------|------------------|----------------------|----------------|-----------------------|--------|-------|------|----------------------------------------------------------------------------------------------------------------------------------------------------------------------------------------------------------------------------------------------------------------|
| 994  | UPI0000D61BB3    | 6                    | 26             | 24.6                  | 252    | 29787 | 10.4 | 39S ribosomal protein L47, mitochondrial precursor (L47mt) (MRP-L47).                                                                                                                                                                                          |
| 994  | Q9HD33           | 6                    | 26             | 24.6                  | 252    | 29577 | 10.3 | 39S ribosomal protein L47, mitochondrial precursor                                                                                                                                                                                                             |
| 995  | Q92979           | 6                    | 12             | 27                    | 244    | 26720 | 9.2  | Probable ribosome biogenesis protein NEP1                                                                                                                                                                                                                      |
| 996  | P48739           | 6                    | 19             | 26.9                  | 271    | 31540 | 6.9  | Phosphatidylinositol transfer protein beta isoform                                                                                                                                                                                                             |
| 996  | P48739-2         | 6                    | 19             | 26.8                  | 272    | 31638 | 6.2  | Isoform 2 of P48739                                                                                                                                                                                                                                            |
| 997  | Q99598           | 6                    | 29             | 26.9                  | 290    | 33112 | 6.6  | Translin-associated protein X                                                                                                                                                                                                                                  |
| 998  | P30040           | 6                    | 30             | 26.8                  | 261    | 28993 | 7.3  | Endoplasmic reticulum protein ERp29 precursor                                                                                                                                                                                                                  |
| 999  | P46108           | 6                    | 22             | 26                    | 304    | 33872 | 5.7  | Proto-oncogene C-crk                                                                                                                                                                                                                                           |
| 999  | Q96HJ0           | 6                    | 22             | 26                    | 304    | 33831 | 5.6  | V-crk sarcoma virus CT10 oncogene homolog                                                                                                                                                                                                                      |
| 1000 | P31942-2         | 6                    | 51             | 26.9                  | 331    | 35239 | 6.9  | Isoform 2 of P31942                                                                                                                                                                                                                                            |
| 1000 | P31942           | 6                    | 51             | 25.7                  | 346    | 36926 | 6.9  | Heterogeneous nuclear ribonucleoprotein H3                                                                                                                                                                                                                     |
| 1000 | Q53F48           | 6                    | 51             | 25.7                  | 346    | 36926 | 7.4  | Heterogeneous nuclear ribonucleoprotein H3 isoform a variant                                                                                                                                                                                                   |
| 1001 | Q99729-3         | 6                    | 38             | 29.5                  | 285    | 30588 | 7.9  | Isoform 3 of Q99729                                                                                                                                                                                                                                            |
| 1001 | UPI000013EBF8    | 6                    | 38             | 25.5                  | 329    | 36187 | 8.6  | Heterogeneous nuclear ribonucleoprotein A/B (hnRNP A/B) (APOBEC-1-binding protein 1) (ABBP-1).                                                                                                                                                                 |
| 1001 | Q53F64           | 6                    | 38             | 25.3                  | 332    | 35996 | 7.4  | Heterogeneous nuclear ribonucleoprotein AB isoform a variant                                                                                                                                                                                                   |
| 1001 | Q99729-2         | 6                    | 38             | 25.3                  | 332    | 35968 | 6.9  | Isoform 2 of Q99729                                                                                                                                                                                                                                            |
| 1002 | Q9H4A6           | 6                    | 24             | 25.2                  | 298    | 33811 | 6.4  | Golgi phosphoprotein 3                                                                                                                                                                                                                                         |
| 1003 | O95571           | 6                    | 16             | 24.8                  | 254    | 27873 | 6.8  | ETHE1 protein, mitochondrial precursor                                                                                                                                                                                                                         |
| 1004 | UPI000069648D    | 6                    | 35             | 27.5                  | 204    | 23587 | 9    | vacuolar H+ ATPase E1 isoform b                                                                                                                                                                                                                                |
| 1004 | P36543           | 6                    | 35             | 24.8                  | 226    | 26145 | 8    | Vacuolar ATP synthase subunit E1                                                                                                                                                                                                                               |
| 1005 | P50402           | 6                    | 32             | 24.8                  | 254    | 28994 | 5.5  | Emerin                                                                                                                                                                                                                                                         |
| 1006 | Q8NBQ5           | 6                    | 18             | 24.7                  | 300    | 32964 | 9.2  | Dehydrogenase/reductase SDR family member 8 precursor                                                                                                                                                                                                          |
| 1006 | UPI00006C088F    | 6                    | 18             | 24.7                  | 300    | 33014 | 9.3  | PREDICTED: similar to Dehydrogenase/reductase SDR family member 8 precursor (17-beta-hydroxysteroid dehydrogenase 11) (17-beta-HSD 11) (17betaHSDXI) (17bHSD11) (17betaHSD11) (Retinal short-chain dehydrogenase/reductase 2) (retSDR2) (Cutaneous...          |
| 1006 | UPI000013FB48    | 6                    | 18             | 24.7                  | 300    | 32936 | 9.1  | Dehydrogenase/reductase SDR family member 8 precursor (EC 1.1.1.-) (17-beta-hydroxysteroid dehydrogenase 11) (17-beta-HSD 11) (17-beta-HSD XI) (17betaHSDXI) (17bHSD11) (17betaHSD11) (Retinal short-chain dehydrogenase/reductase 2) (retSDR2) (Cutaneous T-c |
| 1007 | Q16831           | 6                    | 20             | 24.5                  | 310    | 33934 | 7.9  | Uridine phosphorylase 1                                                                                                                                                                                                                                        |

| No.  | Accession Number | Unique Peptide Count | Spectrum Count | Sequence Coverage (%) | Length | MolWt | pI  | Descriptive Name                                                                                                                     |
|------|------------------|----------------------|----------------|-----------------------|--------|-------|-----|--------------------------------------------------------------------------------------------------------------------------------------|
| 1008 | Q8NBX0           | 6                    | 22             | 24.5                  | 429    | 47151 | 9.1 | Probable saccharopine dehydrogenase                                                                                                  |
| 1009 | P54709           | 6                    | 32             | 24                    | 279    | 31513 | 8.3 | Sodium/potassium-transporting ATPase subunit beta-3                                                                                  |
| 1010 | Q9H2U2-3         | 6                    | 32             | 26.2                  | 305    | 34658 | 8.5 | Isoform 3 of Q9H2U2                                                                                                                  |
| 1010 | Q9H2U2           | 6                    | 32             | 24                    | 334    | 37920 | 7.4 | Inorganic pyrophosphatase 2, mitochondrial precursor                                                                                 |
| 1010 | Q9H2U2-2         | 6                    | 32             | 22.9                  | 349    | 39638 | 6.9 | Isoform 2 of Q9H2U2                                                                                                                  |
| 1011 | Q15006           | 6                    | 16             | 23.6                  | 297    | 34833 | 6.6 | Tetradecapeptide repeat protein 35                                                                                                   |
| 1011 | Q53HG5           | 6                    | 16             | 23.6                  | 297    | 34761 | 6.8 | KIAA0103 variant                                                                                                                     |
| 1012 | O60762           | 6                    | 18             | 23.5                  | 260    | 29634 | 9.6 | Dolichol-phosphate mannosyltransferase                                                                                               |
| 1012 | Q5QPK2           | 6                    | 18             | 21.3                  | 287    | 32426 | 9.1 | Dolichyl-phosphate mannosyltransferase polypeptide 1, catalytic subunit                                                              |
| 1012 | Q5QPK0           | 6                    | 18             | 20.7                  | 294    | 33218 | 9.1 | Dolichyl-phosphate mannosyltransferase polypeptide 1, catalytic subunit                                                              |
| 1013 | P57088           | 6                    | 34             | 23.5                  | 247    | 27978 | 9.7 | Transmembrane protein 33                                                                                                             |
| 1013 | UPI000015F326    | 6                    | 34             | 23.5                  | 247    | 27951 | 9.7 | transmembrane protein 33                                                                                                             |
| 1014 | Q14847           | 6                    | 42             | 23.4                  | 261    | 29717 | 7   | LIM and SH3 domain protein 1                                                                                                         |
| 1014 | UPI0000D62315    | 6                    | 42             | 18.9                  | 322    | 35773 | 8.5 | LIM and SH3 domain protein 1 (LASP-1) (MLN 50).                                                                                      |
| 1014 | Q14847-2         | 6                    | 42             | 18.9                  | 323    | 36014 | 8.6 | Isoform 2 of Q14847                                                                                                                  |
| 1015 | P17931           | 6                    | 11             | 23.2                  | 250    | 26188 | 8.5 | Galectin-3                                                                                                                           |
| 1015 | Q6IBA7           | 6                    | 11             | 23.2                  | 250    | 26152 | 8.5 | LGALS3 protein                                                                                                                       |
| 1015 | Q6FGL0           | 6                    | 11             | 23.2                  | 250    | 26161 | 8.5 | LGALS3 protein                                                                                                                       |
| 1015 | Q59FR8           | 6                    | 11             | 22.5                  | 258    | 27118 | 8.4 | LGALS3 protein variant                                                                                                               |
| 1016 | Q9BTT5           | 6                    | 30             | 25.7                  | 338    | 38442 | 9.7 | Similar to NADH dehydrogenase (Ubiquinone) 1 alpha subcomplex, 9                                                                     |
| 1016 | Q16795           | 6                    | 30             | 23.1                  | 377    | 42510 | 9.8 | NADH dehydrogenase [ubiquinone] 1 alpha subcomplex subunit 9, mitochondrial precursor                                                |
| 1017 | Q9Y5K5-2         | 6                    | 9              | 25.6                  | 316    | 36079 | 5.2 | Isoform 2 of Q9Y5K5                                                                                                                  |
| 1017 | Q9Y5K5-3         | 6                    | 9              | 24.7                  | 328    | 37478 | 5.4 | Isoform 3 of Q9Y5K5                                                                                                                  |
| 1017 | Q9Y5K5           | 6                    | 9              | 24.6                  | 329    | 37607 | 5.3 | Ubiquitin carboxyl-terminal hydrolase isozyme L5                                                                                     |
| 1017 | Q5LJA5           | 6                    | 9              | 22.8                  | 355    | 40423 | 5.3 | Ubiquitin carboxyl-terminal hydrolase L5                                                                                             |
| 1017 | Q5LJA9           | 6                    | 9              | 22                    | 368    | 41695 | 5.5 | Ubiquitin carboxyl-terminal hydrolase L5                                                                                             |
| 1018 | P50213           | 6                    | 21             | 22.1                  | 366    | 39592 | 6.9 | Isocitrate dehydrogenase [NAD] subunit alpha, mitochondrial precursor (EC 1.1.1.41) (Isocitric dehydrogenase) (NAD(+)-specific ICDH) |
| 1018 | Q53GF8           | 6                    | 21             | 22.1                  | 366    | 39620 | 6.9 | Isocitrate dehydrogenase 3 (NAD+) alpha variant                                                                                      |
| 1019 | O75821           | 6                    | 25             | 21.9                  | 320    | 35611 | 6.1 | Eukaryotic translation initiation factor 3 subunit 4                                                                                 |
| 1020 | Q3ZCQ8           | 6                    | 17             | 21.8                  | 353    | 39646 | 8.4 | Import inner membrane translocase subunit TIM50, mitochondrial precursor                                                             |
| 1020 | Q3ZCQ8-2         | 6                    | 17             | 16.9                  | 456    | 50465 | 9.4 | Isoform 2 of Q3ZCQ8                                                                                                                  |
| 1021 | O76003           | 6                    | 22             | 21.2                  | 335    | 37432 | 5.4 | Thioredoxin-like protein 2                                                                                                           |
| 1022 | P25685           | 6                    | 16             | 21.2                  | 340    | 38044 | 8.6 | DnaJ homolog subfamily B member 1                                                                                                    |
| 1022 | Q6FI51           | 6                    | 16             | 21.2                  | 340    | 38010 | 8.6 | DNAJB1 protein                                                                                                                       |

| No.  | Accession Number | Unique Peptide Count | Spectrum Count | Sequence Coverage (%) | Length | MolWt | pI  | Descriptive Name                                                                                                                                                                      |
|------|------------------|----------------------|----------------|-----------------------|--------|-------|-----|---------------------------------------------------------------------------------------------------------------------------------------------------------------------------------------|
| 1023 | P11766           | 6                    | 16             | 21.1                  | 374    | 39724 | 7.5 | Alcohol dehydrogenase class 3 (EC 1.1.1.1) (Alcohol dehydrogenase class III) (Alcohol dehydrogenase class chi chain) (S-(hydroxymethyl)glutathione dehydrogenase)                     |
| 1023 | Q6FI45           | 6                    | 16             | 21.1                  | 374    | 39690 | 7.5 | ADH5 protein                                                                                                                                                                          |
| 1024 | Q53H12           | 6                    | 18             | 21.1                  | 422    | 47137 | 8.1 | Acylglycerol kinase, mitochondrial precursor                                                                                                                                          |
| 1025 | Q96HI4           | 6                    | 14             | 21.1                  | 494    | 56604 | 7.8 | NMT1 protein                                                                                                                                                                          |
| 1025 | P30419           | 6                    | 14             | 21                    | 496    | 56806 | 7.8 | Glycylpeptide N-tetradecanoyltransferase 1                                                                                                                                            |
| 1025 | UPI0000D6234C    | 6                    | 14             | 20.9                  | 498    | 56978 | 7.8 | Glycylpeptide N-tetradecanoyltransferase 1 (EC 2.3.1.97) (Peptide N-myristoyltransferase 1) (Myristoyl-CoA:protein N-myristoyltransferase 1) (NMT 1) (Type I N-myristoyltransferase). |
| 1026 | P11177-2         | 6                    | 21             | 22                    | 341    | 37200 | 5.9 | Isoform 2 of P11177                                                                                                                                                                   |
| 1026 | P11177           | 6                    | 21             | 20.9                  | 359    | 39233 | 6.6 | Pyruvate dehydrogenase E1 component subunit beta, mitochondrial precursor                                                                                                             |
| 1026 | UPI0000161B07    | 6                    | 21             | 20.9                  | 359    | 39249 | 6.6 | pyruvate dehydrogenase (lipoamide) beta                                                                                                                                               |
| 1027 | P31689           | 6                    | 17             | 20.7                  | 397    | 44868 | 7.1 | DnaJ homolog subfamily A member 1                                                                                                                                                     |
| 1028 | P54727           | 6                    | 9              | 20.3                  | 409    | 43171 | 4.8 | UV excision repair protein RAD23 homolog B                                                                                                                                            |
| 1028 | Q53F10           | 6                    | 9              | 20.3                  | 409    | 43113 | 4.9 | UV excision repair protein RAD23 homolog B variant                                                                                                                                    |
| 1029 | UPI00004BEBE5    | 6                    | 11             | 20.2                  | 392    | 43449 | 8   | TIA-1 related protein isoform 2                                                                                                                                                       |
| 1030 | Q6FHU0           | 6                    | 24             | 20.2                  | 272    | 29696 | 5.8 | PSMB8 protein                                                                                                                                                                         |
| 1030 | Q5JNW6           | 6                    | 24             | 20.2                  | 272    | 29770 | 5.8 | Proteasome subunit beta type                                                                                                                                                          |
| 1030 | P28062           | 6                    | 24             | 19.9                  | 276    | 30354 | 7.8 | Proteasome subunit beta type 8 precursor                                                                                                                                              |
| 1030 | Q5QNR8           | 6                    | 24             | 19.9                  | 276    | 30354 | 7.4 | Proteasome subunit beta type                                                                                                                                                          |
| 1031 | Q1XBU6           | 6                    | 29             | 28.6                  | 255    | 28366 | 8.8 | Aging-associated protein 14b                                                                                                                                                          |
| 1031 | P50502           | 6                    | 29             | 19.8                  | 369    | 41332 | 5.3 | Hsc70-interacting protein                                                                                                                                                             |
| 1032 | UPI0000D617D3    | 6                    | 32             | 35.7                  | 207    | 22366 | 9.1 | Vasodilator-stimulated phosphoprotein (VASP).                                                                                                                                         |
| 1032 | P50552           | 6                    | 32             | 19.5                  | 380    | 39830 | 8.9 | Vasodilator-stimulated phosphoprotein                                                                                                                                                 |
| 1033 | P16402           | 6                    | 83             | 19                    | 221    | 22350 | 11  | Histone H1.3                                                                                                                                                                          |
| 1034 | Q542Y9           | 6                    | 13             | 18.7                  | 358    | 40500 | 6.2 | CDNA FLJ90819 fis, clone Y79AA1001264, highly similar to DnaJ homolog subfamily B member 11                                                                                           |
| 1034 | Q9UBS4           | 6                    | 13             | 18.7                  | 358    | 40514 | 6.2 | DnaJ homolog subfamily B member 11 precursor                                                                                                                                          |
| 1034 | Q6IAQ8           | 6                    | 13             | 18.7                  | 358    | 40542 | 6.2 | DNAJB11 protein                                                                                                                                                                       |
| 1035 | Q13077           | 6                    | 15             | 18.5                  | 416    | 46164 | 6.1 | TNF receptor-associated factor 1                                                                                                                                                      |
| 1036 | Q15293           | 6                    | 66             | 18.4                  | 331    | 38890 | 5   | Reticulocalbin-1 precursor                                                                                                                                                            |
| 1037 | Q96HC5           | 6                    | 18             | 18.3                  | 471    | 53121 | 9.1 | U2 small nuclear RNA auxiliary factor 2                                                                                                                                               |
| 1037 | P26368           | 6                    | 18             | 18.1                  | 475    | 53501 | 9.1 | Splicing factor U2AF 65 kDa subunit (U2 auxiliary factor 65 kDa subunit) (U2 snRNP auxiliary factor large subunit) (hU2AF(65))                                                        |

| No.  | Accession Number | Unique Peptide Count | Spectrum Count | Sequence Coverage (%) | Length | MolWt | pI   | Descriptive Name                                                                                                                |
|------|------------------|----------------------|----------------|-----------------------|--------|-------|------|---------------------------------------------------------------------------------------------------------------------------------|
| 1037 | UPI0000D6181E    | 6                    | 18             | 18                    | 477    | 53728 | 9.2  | Splicing factor U2AF 65 kDa subunit (U2 auxiliary factor 65 kDa subunit) (U2 snRNP auxiliary factor large subunit) (hU2AF(65)). |
| 1038 | Q53GI0           | 6                    | 17             | 18.1                  | 420    | 46337 | 7.2  | GDP-mannose pyrophosphorylase A                                                                                                 |
| 1038 | Q9NWC3           | 6                    | 17             | 18.1                  | 420    | 46351 | 7.2  | CDNA FLJ10137 fis, clone HEMBA1003136, weakly similar to MANNOSE-1- PHOSPHATE GUANYLTRANSFERASE                                 |
| 1038 | Q96IJ6           | 6                    | 17             | 18.1                  | 420    | 46291 | 7.2  | GDP-mannose pyrophosphorylase A                                                                                                 |
| 1038 | UPI000066D9A1    | 6                    | 17             | 16.1                  | 473    | 52018 | 7.2  | GDP-mannose pyrophosphorylase A                                                                                                 |
| 1039 | O75955           | 6                    | 8              | 18                    | 427    | 47355 | 7.5  | Flotillin-1                                                                                                                     |
| 1039 | Q53HQ0           | 6                    | 8              | 18                    | 427    | 47354 | 8.1  | Flotillin 1 variant                                                                                                             |
| 1040 | Q9UBT2           | 6                    | 24             | 17.5                  | 640    | 71224 | 5.3  | SUMO-activating enzyme subunit 2                                                                                                |
| 1041 | P36507           | 6                    | 17             | 16.8                  | 400    | 44424 | 6.5  | Dual specificity mitogen-activated protein kinase kinase 2                                                                      |
| 1042 | UPI0000233611    | 6                    | 27             | 16.5                  | 370    | 42210 | 6.6  | ubiquitin-conjugating enzyme E2 Kua-UEV isoform 1                                                                               |
| 1043 | Q0VGU9           | 6                    | 33             | 22.6                  | 367    | 39818 | 6.6  | Rbm39 protein                                                                                                                   |
| 1043 | A2RRD3           | 6                    | 33             | 16.3                  | 508    | 57090 | 10   | RBM39 protein                                                                                                                   |
| 1043 | Q68DD9           | 6                    | 33             | 16.2                  | 513    | 57444 | 10.3 | Hypothetical protein DKFZp781C0423                                                                                              |
| 1043 | Q5RC80           | 6                    | 33             | 15.8                  | 524    | 58657 | 10.1 | RNA-binding protein 39                                                                                                          |
| 1043 | Q14498           | 6                    | 33             | 15.7                  | 530    | 59380 | 10.1 | RNA-binding protein 39                                                                                                          |
| 1044 | O96019           | 6                    | 17             | 16.1                  | 429    | 47461 | 5.6  | Actin-like protein 6A                                                                                                           |
| 1044 | Q6FI97           | 6                    | 17             | 16.1                  | 429    | 47381 | 5.7  | BAF53A protein                                                                                                                  |
| 1044 | Q53FS0           | 6                    | 17             | 16.1                  | 429    | 47481 | 5.7  | Actin-like 6A isoform 1 variant                                                                                                 |
| 1045 | Q53GF0           | 6                    | 26             | 16.1                  | 434    | 48329 | 7.9  | Cytidine 5'-monophosphate N-acetylneuraminic acid synthetase variant                                                            |
| 1045 | Q8NFW8           | 6                    | 26             | 16.1                  | 434    | 48379 | 7.9  | N-acetylneuraminic acid cytidylyltransferase                                                                                    |
| 1046 | P36871           | 6                    | 14             | 16                    | 562    | 61449 | 6.8  | Phosphoglucomutase-1                                                                                                            |
| 1046 | UPI0000D61F2F    | 6                    | 14             | 16                    | 564    | 61633 | 6.8  | Phosphoglucomutase-1 (EC 5.4.2.2) (Glucose phosphomutase 1) (PGM 1).                                                            |
| 1046 | Q86U74           | 6                    | 14             | 16                    | 562    | 61370 | 6.6  | Phosphoglucomutase 1                                                                                                            |
| 1046 | Q6NW22           | 6                    | 14             | 16                    | 562    | 61439 | 6.8  | Phosphoglucomutase 1                                                                                                            |
| 1047 | Q59H65           | 6                    | 16             | 16.7                  | 461    | 51892 | 6.8  | Aldehyde dehydrogenase 3A2 variant                                                                                              |
| 1047 | P51648           | 6                    | 16             | 15.9                  | 485    | 54848 | 7.9  | Fatty aldehyde dehydrogenase                                                                                                    |
| 1047 | P51648-2         | 6                    | 16             | 15.2                  | 508    | 57669 | 8.9  | Isoform 2 of P51648                                                                                                             |
| 1048 | Q0VGA5           | 6                    | 9              | 15.9                  | 511    | 58407 | 6.4  | SARS protein                                                                                                                    |
| 1048 | P49591           | 6                    | 9              | 15.8                  | 514    | 58777 | 6.4  | Seryl-tRNA synthetase, cytoplasmic                                                                                              |
| 1048 | Q53HA4           | 6                    | 9              | 15.8                  | 514    | 58690 | 6.4  | Seryl-tRNA synthetase variant                                                                                                   |
| 1048 | UPI0000D61F7C    | 6                    | 9              | 15.1                  | 536    | 61285 | 7.1  | Seryl-tRNA synthetase, cytoplasmic (EC 6.1.1.11) (Serine--tRNA ligase) (SerRS).                                                 |
| 1048 | Q5T5C7           | 6                    | 9              | 15.1                  | 536    | 61313 | 7.1  | Seryl-tRNA synthetase                                                                                                           |
| 1049 | Q99961           | 6                    | 11             | 15.5                  | 368    | 41490 | 5.4  | SH3-containing GRB2-like protein 1                                                                                              |
| 1050 | P55010           | 6                    | 20             | 15.3                  | 431    | 49223 | 5.6  | Eukaryotic translation initiation factor 5                                                                                      |
| 1050 | Q6IBU0           | 6                    | 20             | 15.3                  | 431    | 49152 | 5.5  | EIF5 protein                                                                                                                    |
| 1051 | Q96JJ7           | 6                    | 14             | 15.2                  | 454    | 51872 | 4.9  | Protein disulfide-isomerase TXNDC10 precursor                                                                                   |

| No.  | Accession Number | Unique Peptide Count | Spectrum Count | Sequence Coverage (%) | Length | MolWt  | pI  | Descriptive Name                                                               |
|------|------------------|----------------------|----------------|-----------------------|--------|--------|-----|--------------------------------------------------------------------------------|
| 1052 | P08621-2         | 6                    | 12             | 15.4                  | 428    | 50618  | 9.9 | Isoform 2 of P08621                                                            |
| 1052 | P08621           | 6                    | 12             | 15.1                  | 437    | 51557  | 9.9 | U1 small nuclear ribonucleoprotein 70 kDa                                      |
| 1053 | P00390           | 6                    | 14             | 14.9                  | 522    | 56257  | 8.5 | Glutathione reductase, mitochondrial precursor                                 |
| 1054 | A0PJJ5           | 6                    | 10             | 14.8                  | 559    | 62644  | 8.3 | Hypothetical protein                                                           |
| 1054 | Q0D2M6           | 6                    | 10             | 14.8                  | 560    | 62730  | 8.2 | Hypothetical protein                                                           |
| 1054 | Q71V07           | 6                    | 10             | 12.4                  | 671    | 74607  | 9.2 | Putative signal recognition particle                                           |
| 1054 | O76094           | 6                    | 10             | 12.4                  | 671    | 74606  | 9.3 | Signal recognition particle 72 kDa protein                                     |
| 1055 | O60832           | 6                    | 9              | 14.8                  | 514    | 57674  | 9.4 | H/ACA ribonucleoprotein complex subunit 4                                      |
| 1056 | P49189           | 6                    | 11             | 14.8                  | 494    | 53802  | 5.9 | 4-trimethylaminobutyraldehyde dehydrogenase                                    |
| 1057 | Q7Z4H8           | 6                    | 32             | 14.8                  | 507    | 58573  | 8.2 | KDEL motif-containing protein 2 precursor                                      |
| 1057 | UPI00001B5C05    | 6                    | 32             | 14.8                  | 507    | 58489  | 8.1 | KDEL (Lys-Asp-Glu-Leu) containing 2                                            |
| 1058 | P23634-5         | 6                    | 30             | 16.3                  | 1122   | 124007 | 7.3 | Isoform ZK of P23634                                                           |
| 1058 | P23634-4         | 6                    | 30             | 16.1                  | 1134   | 125344 | 7.7 | Isoform XK of P23634                                                           |
| 1058 | P23634-3         | 6                    | 30             | 15.8                  | 1158   | 128066 | 7.1 | Isoform ZA of P23634                                                           |
| 1058 | Q5T0B3           | 6                    | 30             | 15.6                  | 1170   | 129403 | 7.5 | Cation-transporting ATPase                                                     |
| 1058 | P23634-7         | 6                    | 30             | 15.3                  | 1193   | 132594 | 6.2 | Isoform ZB of P23634                                                           |
| 1058 | Q7Z3S1           | 6                    | 30             | 15.2                  | 1205   | 133874 | 6.5 | Cation-transporting ATPase                                                     |
| 1058 | Q5T0B2           | 6                    | 30             | 15.2                  | 1205   | 133930 | 6.4 | Cation-transporting ATPase                                                     |
| 1058 | P23634-8         | 6                    | 30             | 14.9                  | 1229   | 136583 | 6.4 | Isoform ZD of P23634                                                           |
| 1058 | P23634           | 6                    | 30             | 14.7                  | 1241   | 137920 | 6.6 | Plasma membrane calcium-transporting ATPase 4                                  |
| 1059 | Q13098           | 6                    | 9              | 14.6                  | 471    | 53372  | 6.7 | COP9 signalosome complex subunit 1                                             |
| 1059 | Q13098-2         | 6                    | 9              | 14.5                  | 475    | 53816  | 6.9 | Isoform 2 of Q13098                                                            |
| 1059 | UPI0000231C2E    | 6                    | 9              | 13.1                  | 527    | 59050  | 6.3 | G protein pathway suppressor 1 isoform 1                                       |
| 1060 | Q8NF37           | 6                    | 26             | 14.6                  | 534    | 59151  | 6   | 1-acylglycerophosphocholine O-acyltransferase 1                                |
| 1061 | Q96I24           | 6                    | 10             | 14.5                  | 572    | 61640  | 8.4 | Far upstream element-binding protein 3                                         |
| 1062 | Q59H57           | 6                    | 32             | 25                    | 300    | 31994  | 9.5 | Fusion (Involved in t(12;16) in malignant liposarcoma) isoform a variant       |
| 1062 | P35637           | 6                    | 32             | 14.3                  | 526    | 53426  | 9.4 | RNA-binding protein FUS                                                        |
| 1062 | Q8TBR3           | 6                    | 32             | 14.3                  | 526    | 53400  | 9.4 | Fusion (Involved in t(12;16) in malignant liposarcoma)                         |
| 1062 | P35637-2         | 6                    | 32             | 14.3                  | 525    | 53355  | 9.4 | Isoform Short of P35637                                                        |
| 1062 | Q13344           | 6                    | 32             | 14.2                  | 528    | 53377  | 9.4 | Fus-like protein                                                               |
| 1063 | Q9P129           | 6                    | 16             | 16.5                  | 411    | 45819  | 5.5 | Calcium-binding transporter                                                    |
| 1063 | Q6NUK1           | 6                    | 16             | 14.3                  | 477    | 53338  | 6.3 | Solute carrier family 25 member 24                                             |
| 1063 | UPI00001BDC72    | 6                    | 16             | 14.3                  | 476    | 53251  | 6.3 | solute carrier family 25 member 24 isoform 1                                   |
| 1063 | Q6PJJ9           | 6                    | 16             | 14.3                  | 477    | 53354  | 6.3 | Solute carrier family 25 (Mitochondrial carrier; phosphate carrier), member 24 |
| 1064 | UPI00005A6C9C    | 6                    | 11             | 15.3                  | 459    | 52386  | 5.8 | ubiquitin specific protease 14 isoform b                                       |
| 1064 | P54578           | 6                    | 11             | 14.2                  | 494    | 56069  | 5.3 | Ubiquitin carboxyl-terminal hydrolase 14                                       |
| 1065 | Q86WL4           | 6                    | 9              | 14.7                  | 518    | 58511  | 8.4 | Gastric cancer multi-drug resistance protein variant                           |
| 1065 | Q5LJ98           | 6                    | 9              | 14.7                  | 518    | 58483  | 8.4 | TROVE domain family, member 2                                                  |
| 1065 | Q5LJA0           | 6                    | 9              | 14.5                  | 525    | 59270  | 8.5 | TROVE domain family, member 2                                                  |

| No.  | Accession Number | Unique Peptide Count | Spectrum Count | Sequence Coverage (%) | Length | MolWt | pI  | Descriptive Name                                                                                              |
|------|------------------|----------------------|----------------|-----------------------|--------|-------|-----|---------------------------------------------------------------------------------------------------------------|
| 1065 | Q86WL3           | 6                    | 9              | 14.2                  | 534    | 60197 | 8.1 | Gastric cancer multi-drug resistance protein variant                                                          |
| 1065 | Q5LJ99           | 6                    | 9              | 14.2                  | 534    | 60169 | 8.1 | TROVE domain family, member 2                                                                                 |
| 1065 | P10155           | 6                    | 9              | 14.1                  | 538    | 60671 | 8   | 60 kDa SS-A/Ro ribonucleoprotein                                                                              |
| 1066 | Q09028           | 6                    | 22             | 14.1                  | 425    | 47656 | 4.9 | Histone-binding protein RBBP4                                                                                 |
| 1067 | Q13177           | 6                    | 14             | 13.7                  | 524    | 58043 | 6   | Serine/threonine-protein kinase PAK 2                                                                         |
| 1068 | Q53HE9           | 6                    | 42             | 13.6                  | 487    | 53598 | 8.2 | Ankylosis, progressive homolog                                                                                |
| 1068 | Q9HCJ1           | 6                    | 42             | 13.4                  | 492    | 54241 | 7.9 | Progressive ankylosis protein homolog                                                                         |
| 1069 | Q4ZG30           | 6                    | 39             | 13.1                  | 579    | 66087 | 6.1 | Hypothetical protein ARL6IP2                                                                                  |
| 1069 | Q9H5M7           | 6                    | 39             | 13.1                  | 579    | 66159 | 6   | CDNA: FLJ23293 fis, clone HEP10514                                                                            |
| 1069 | Q8NHH8           | 6                    | 39             | 13.1                  | 579    | 66057 | 6.2 | ARL6IP2                                                                                                       |
| 1069 | UPI00001B00A2    | 6                    | 39             | 13                    | 583    | 66229 | 5.5 | ADP-ribosylation factor-like 6 interacting protein 2                                                          |
| 1069 | Q8NHH9           | 6                    | 39             | 13                    | 583    | 66199 | 5.5 | ADP-ribosylation factor-like protein 6-interacting protein 2                                                  |
| 1070 | Q9NZ37           | 6                    | 9              | 13.4                  | 397    | 45398 | 7.1 | Uncharacterized hypothalamus protein HT010                                                                    |
| 1070 | UPI0000D6127F    | 6                    | 9              | 12.9                  | 412    | 47015 | 6.4 | erythropoietin 4 immediate early response                                                                     |
| 1070 | Q5QTQ4           | 6                    | 9              | 12.8                  | 413    | 47143 | 6.6 | MSTP012                                                                                                       |
| 1070 | Q9NUZ3           | 6                    | 9              | 12.4                  | 426    | 48631 | 5.4 | CDNA FLJ11039 fis, clone PLACE1004376                                                                         |
| 1070 | Q8WU90           | 6                    | 9              | 12.4                  | 426    | 48603 | 5.3 | Zinc finger CCCH-type containing 15                                                                           |
| 1070 | Q9P079           | 6                    | 9              | 11.6                  | 458    | 51851 | 5.2 | HSPC303                                                                                                       |
| 1071 | Q969V3           | 6                    | 10             | 12.6                  | 563    | 62974 | 6.9 | Nicalin precursor                                                                                             |
| 1071 | Q969V3-2         | 6                    | 10             | 12.6                  | 562    | 62846 | 6.9 | Isoform 2 of Q969V3                                                                                           |
| 1072 | Q12996           | 6                    | 15             | 12.4                  | 717    | 82922 | 8.1 | Cleavage stimulation factor 77 kDa subunit                                                                    |
| 1073 | Q8NFM1           | 6                    | 10             | 12                    | 585    | 65060 | 8.9 | Eukaryotic translation initiation factor 2A                                                                   |
| 1073 | UPI00000473DB    | 6                    | 10             | 12                    | 585    | 64990 | 8.9 | eukaryotic translation initiation factor 2A                                                                   |
| 1073 | Q96K81           | 6                    | 10             | 12                    | 585    | 64986 | 8.9 | CDNA FLJ14450 fis, clone HEMBB1001736, weakly similar to EUKARYOTIC TRANSLATION INITIATION FACTOR 3 SUBUNIT 9 |
| 1073 | Q96EW9           | 6                    | 10             | 12                    | 585    | 64989 | 9   | Eukaryotic translation initiation factor 2A, 65kDa                                                            |
| 1073 | UPI000045718C    | 6                    | 10             | 11.5                  | 608    | 67707 | 8.9 | eukaryotic translation initiation factor 2A                                                                   |
| 1073 | Q9BY44           | 6                    | 10             | 11.5                  | 609    | 67851 | 9   | Eukaryotic translation initiation factor 2A 65 kDa                                                            |



| No.  | Accession Number | Unique Peptide Count | Spectrum Count | Sequence Coverage (%) | Length | MolWt  | pI   | Descriptive Name                                                                                                                                                                                                                                                                                                                                                                                        |
|------|------------------|----------------------|----------------|-----------------------|--------|--------|------|---------------------------------------------------------------------------------------------------------------------------------------------------------------------------------------------------------------------------------------------------------------------------------------------------------------------------------------------------------------------------------------------------------|
| 1074 | P53634           | 6                    | 18             | 11.7                  | 463    | 51842  | 7    | Dipeptidyl-peptidase 1 precursor (EC 3.4.14.1) (Dipeptidyl-peptidase I) (DPP-I) (DPPI) (Cathepsin C) (Cathepsin J) (Dipeptidyl transferase) [Contains: Dipeptidyl-peptidase 1 exclusion domain chain (Dipeptidyl-peptidase I exclusion domain chain); Dipeptidyl-peptidase 1 heavy chain (Dipeptidyl-peptidase I heavy chain); Dipeptidyl-peptidase 1 light chain (Dipeptidyl-peptidase I light chain)] |
| 1074 | UPI000006D22D    | 6                    | 18             | 11.7                  | 463    | 51854  | 7    | Dipeptidyl-peptidase 1 precursor (EC 3.4.14.1) (Dipeptidyl-peptidase I) (DPP-I) (DPPI) (Cathepsin C) (Cathepsin J) (Dipeptidyl transferase) [Contains: Dipeptidyl-peptidase 1 exclusion domain chain (Dipeptidyl-peptidase I exclusion domain chain); Dipeptidyl-peptidase 1 heavy chain (Dipeptidyl-peptidase I heavy chain); Dipeptidyl-peptidase 1 light chain (Dipeptidyl-peptidase I light chain)] |
| 1074 | Q8WY99           | 6                    | 18             | 11.7                  | 463    | 51902  | 7    | Cathepsin C                                                                                                                                                                                                                                                                                                                                                                                             |
| 1074 | Q71E76           | 6                    | 18             | 11.7                  | 463    | 51816  | 7    | Cathepsin C                                                                                                                                                                                                                                                                                                                                                                                             |
| 1075 | Q8NA80           | 6                    | 27             | 12.4                  | 534    | 58309  | 9.2  | CDNA FLJ35762 fis, clone TESTI2004793, moderately similar to Homo sapiens NY-REN-2 antigen mRNA                                                                                                                                                                                                                                                                                                         |
| 1075 | UPI0000D624D2    | 6                    | 27             | 11.4                  | 579    | 63076  | 9    | YTH domain family protein 3.                                                                                                                                                                                                                                                                                                                                                                            |
| 1075 | Q7Z739           | 6                    | 27             | 11.3                  | 585    | 63861  | 9    | YTH domain family protein 3                                                                                                                                                                                                                                                                                                                                                                             |
| 1076 | P28288           | 6                    | 27             | 11.1                  | 659    | 75476  | 9.4  | ATP-binding cassette sub-family D member 3                                                                                                                                                                                                                                                                                                                                                              |
| 1077 | P35610           | 6                    | 8              | 11.1                  | 550    | 64735  | 8.9  | Sterol O-acyltransferase 1                                                                                                                                                                                                                                                                                                                                                                              |
| 1078 | Q8IYB3-2         | 6                    | 16             | 11.1                  | 902    | 102126 | 11.8 | Isoform 2 of Q8IYB3                                                                                                                                                                                                                                                                                                                                                                                     |
| 1078 | Q8IYB3           | 6                    | 16             | 11.1                  | 904    | 102335 | 11.8 | Serine/arginine repetitive matrix protein 1                                                                                                                                                                                                                                                                                                                                                             |
| 1078 | Q5VVN3           | 6                    | 16             | 11                    | 913    | 103390 | 11.8 | Serine/arginine repetitive matrix 1                                                                                                                                                                                                                                                                                                                                                                     |
| 1079 | Q96AC1-2         | 6                    | 14             | 11.5                  | 633    | 72397  | 7.5  | Isoform 2 of Q96AC1                                                                                                                                                                                                                                                                                                                                                                                     |
| 1079 | Q96AC1           | 6                    | 14             | 10.7                  | 680    | 77861  | 6.7  | Pleckstrin homology domain-containing family C member 1                                                                                                                                                                                                                                                                                                                                                 |
| 1080 | P28331           | 6                    | 15             | 10.6                  | 727    | 79468  | 6.2  | NADH-ubiquinone oxidoreductase 75 kDa subunit, mitochondrial precursor                                                                                                                                                                                                                                                                                                                                  |
| 1081 | O00461           | 6                    | 10             | 10.1                  | 696    | 81880  | 4.8  | Golgi phosphoprotein 4                                                                                                                                                                                                                                                                                                                                                                                  |
| 1082 | Q14978           | 6                    | 27             | 10                    | 699    | 73603  | 9.5  | Nucleolar phosphoprotein p130                                                                                                                                                                                                                                                                                                                                                                           |
| 1082 | UPI00001303C3    | 6                    | 27             | 10                    | 699    | 73720  | 9.5  | nucleolar and coiled-body phosphoprotein 1                                                                                                                                                                                                                                                                                                                                                              |
| 1082 | Q9BUV3           | 6                    | 27             | 10                    | 700    | 73745  | 9.5  | Nucleolar and coiled-body phosphoprotein 1                                                                                                                                                                                                                                                                                                                                                              |
| 1082 | Q14978-2         | 6                    | 27             | 9.9                   | 709    | 74747  | 9.5  | Isoform Beta of Q14978                                                                                                                                                                                                                                                                                                                                                                                  |
| 1083 | P30825           | 6                    | 35             | 9.9                   | 629    | 67638  | 5.4  | High-affinity cationic amino acid transporter 1                                                                                                                                                                                                                                                                                                                                                         |
| 1084 | P53794           | 6                    | 28             | 9.2                   | 718    | 79694  | 7.3  | Sodium/myo-inositol cotransporter (Na(+)/myo-inositol cotransporter)                                                                                                                                                                                                                                                                                                                                    |
| 1085 | Q8N556           | 6                    | 31             | 9                     | 730    | 80741  | 8.6  | Actin filament associated protein 1                                                                                                                                                                                                                                                                                                                                                                     |

| No.  | Accession Number | Unique Peptide Count | Spectrum Count | Sequence Coverage (%) | Length | MolWt  | pI  | Descriptive Name                                                                                                                           |
|------|------------------|----------------------|----------------|-----------------------|--------|--------|-----|--------------------------------------------------------------------------------------------------------------------------------------------|
| 1085 | UPI0000233618    | 6                    | 31             | 9                     | 730    | 80725  | 8.7 | actin filament associated protein 1                                                                                                        |
| 1085 | Q9HBY1           | 6                    | 31             | 9                     | 730    | 80727  | 8.7 | Actin filament associated protein                                                                                                          |
| 1086 | Q5T3X0           | 6                    | 31             | 16.9                  | 414    | 46139  | 9.6 | Interferon, gamma-inducible protein 16                                                                                                     |
| 1086 | Q16666-2         | 6                    | 31             | 9.6                   | 729    | 82096  | 9.3 | Isoform 2 of Q16666                                                                                                                        |
| 1086 | Q16666           | 6                    | 31             | 8.9                   | 785    | 88256  | 9.3 | Gamma-interferon-inducible protein Irfi-16                                                                                                 |
| 1087 | Q2TTR2           | 6                    | 14             | 8.6                   | 928    | 103136 | 4.8 | Cell growth inhibiting protein 39                                                                                                          |
| 1087 | Q9BZQ8           | 6                    | 14             | 8.6                   | 928    | 103135 | 4.8 | Niban protein                                                                                                                              |
| 1088 | Q7Z5K2           | 6                    | 10             | 8.2                   | 1190   | 132945 | 5.4 | Wings apart-like protein homolog                                                                                                           |
| 1088 | UPI0000D60F87    | 6                    | 10             | 8                     | 1228   | 137363 | 5.9 | Wings apart-like protein homolog (Friend of EBNA2 protein).                                                                                |
| 1088 | Q7Z5K2-2         | 6                    | 10             | 8                     | 1227   | 137314 | 5.9 | Isoform 2 of Q7Z5K2                                                                                                                        |
| 1089 | UPI00004576CB    | 6                    | 8              | 8.2                   | 777    | 89028  | 9.6 | RNA-binding protein 12B (RNA-binding motif protein 12B).                                                                                   |
| 1090 | Q13616           | 6                    | 18             | 8.1                   | 776    | 89678  | 8   | Cullin-1                                                                                                                                   |
| 1091 | O94855           | 6                    | 19             | 8                     | 1032   | 113000 | 7.2 | Protein transport protein Sec24D                                                                                                           |
| 1091 | UPI00001AEA4F    | 6                    | 19             | 8                     | 1032   | 113010 | 7.2 | Protein transport protein Sec24D (SEC24-related protein D).                                                                                |
| 1091 | Q8IYI7           | 6                    | 19             | 8                     | 1033   | 113081 | 7.2 | SEC24 related gene family, member D                                                                                                        |
| 1092 | Q53HG6           | 6                    | 19             | 8.3                   | 726    | 82804  | 7   | Cysteine-tRNA ligase isoform a variant                                                                                                     |
| 1092 | P49589-2         | 6                    | 19             | 8.3                   | 726    | 82846  | 7   | Isoform 2 of P49589                                                                                                                        |
| 1092 | UPI00004F8E1C    | 6                    | 19             | 8.1                   | 738    | 84472  | 6.4 | cysteinyI-tRNA synthetase isoform d                                                                                                        |
| 1092 | P49589           | 6                    | 19             | 8                     | 748    | 85473  | 6.7 | CysteinyI-tRNA synthetase, cytoplasmic                                                                                                     |
| 1092 | Q5HYE4           | 6                    | 19             | 7.2                   | 831    | 94638  | 6.8 | Hypothetical protein DKFZp686F1612                                                                                                         |
| 1093 | Q3ZAQ6           | 6                    | 25             | 8                     | 839    | 94447  | 6.7 | Autophagy 9-like 1 protein                                                                                                                 |
| 1093 | UPI0000456EF3    | 6                    | 25             | 8                     | 839    | 94471  | 6.7 | Autophagy-related protein 9A (APG9-like 1).                                                                                                |
| 1093 | Q7Z3C6           | 6                    | 25             | 8                     | 839    | 94466  | 6.7 | Autophagy-related protein 9A                                                                                                               |
| 1094 | Q59H74           | 6                    | 10             | 8                     | 854    | 95158  | 5.9 | Integrin alpha 4 variant                                                                                                                   |
| 1095 | Q14739           | 6                    | 26             | 7.8                   | 615    | 70703  | 9.4 | Lamin-B receptor                                                                                                                           |
| 1096 | UPI0000D620CF    | 6                    | 9              | 8.1                   | 1084   | 120372 | 5.2 | Nuclear pore complex protein Nup133 (Nucleoporin Nup133) (133 kDa nucleoporin).                                                            |
| 1096 | Q8WUM0           | 6                    | 9              | 7.6                   | 1156   | 128979 | 5.1 | Nuclear pore complex protein Nup133                                                                                                        |
| 1097 | Q6Y7W6-2         | 6                    | 14             | 8.7                   | 1100   | 127290 | 5.4 | Isoform 2 of Q6Y7W6                                                                                                                        |
| 1097 | Q6Y7W6           | 6                    | 14             | 7.4                   | 1299   | 150070 | 5.5 | PERQ amino acid-rich with GYF domain-containing protein 2                                                                                  |
| 1097 | UPI0000D612CD    | 6                    | 14             | 7.4                   | 1301   | 150271 | 5.5 | PERQ amino acid-rich with GYF domain-containing protein 2 (Grb10- interacting GYF protein 2) (Trinucleotide repeat-containing protein 15). |
| 1098 | Q9H7I6           | 6                    | 33             | 10                    | 672    | 71623  | 7.9 | FLJ00100 protein                                                                                                                           |
| 1098 | Q9H7Q7           | 6                    | 33             | 8.7                   | 772    | 81919  | 8.3 | FLJ00010 protein                                                                                                                           |
| 1098 | Q9BXP2           | 6                    | 33             | 7.3                   | 914    | 96110  | 8.1 | Solute carrier family 12 member 9                                                                                                          |
| 1098 | Q9NQR5           | 6                    | 33             | 7.3                   | 914    | 96171  | 8.1 | Cation-chloride cotransporter-interacting protein                                                                                          |
| 1098 | Q9BYI0           | 6                    | 33             | 7.3                   | 914    | 96079  | 8.3 | Cation chloride cotransporter 6                                                                                                            |
| 1099 | Q4LE61           | 6                    | 13             | 7.2                   | 1073   | 118793 | 7   | SYMPK variant protein                                                                                                                      |

| No.  | Accession Number | Unique Peptide Count | Spectrum Count | Sequence Coverage (%) | Length | MolWt  | pI  | Descriptive Name                                                                                                                                                      |
|------|------------------|----------------------|----------------|-----------------------|--------|--------|-----|-----------------------------------------------------------------------------------------------------------------------------------------------------------------------|
| 1099 | UPI00000622E6    | 6                    | 13             | 6.7                   | 1142   | 126500 | 6.4 | Symplekin.                                                                                                                                                            |
| 1099 | Q92797           | 6                    | 13             | 6                     | 1274   | 141148 | 6.1 | Symplekin                                                                                                                                                             |
| 1100 | Q9NT51           | 6                    | 8              | 9.1                   | 859    | 96782  | 7.7 | Hypothetical protein DKFZp434P1818                                                                                                                                    |
| 1100 | Q2T9J4           | 6                    | 8              | 6.9                   | 1132   | 128394 | 7   | Inositol polyphosphate-5-phosphatase F                                                                                                                                |
| 1100 | Q9Y2H2           | 6                    | 8              | 6.8                   | 1150   | 130166 | 7.1 | Inositol polyphosphate-5-phosphatase F                                                                                                                                |
| 1101 | Q8IY37           | 6                    | 10             | 6.7                   | 1157   | 129545 | 8.1 | Probable ATP-dependent RNA helicase DHX37                                                                                                                             |
| 1102 | Q15020           | 6                    | 10             | 6.5                   | 963    | 109935 | 5.6 | Squamous cell carcinoma antigen recognized by T-cells 3                                                                                                               |
| 1103 | Q96KR1           | 6                    | 7              | 6.2                   | 1057   | 115287 | 9.3 | Zinc finger RNA-binding protein                                                                                                                                       |
| 1103 | UPI00001BBB38    | 6                    | 7              | 6.1                   | 1074   | 117012 | 9   | zinc finger RNA binding protein                                                                                                                                       |
| 1104 | Q92626           | 6                    | 16             | 5.7                   | 1496   | 167210 | 7.3 | Peroxidasin homolog                                                                                                                                                   |
| 1105 | P32004           | 6                    | 10             | 5.5                   | 1257   | 140003 | 6.2 | Neural cell adhesion molecule L1 precursor                                                                                                                            |
| 1105 | UPI00001AEDC0    | 6                    | 10             | 5.5                   | 1248   | 138907 | 6.2 | Neural cell adhesion molecule L1 precursor (N-CAM L1) (CD171 antigen).                                                                                                |
| 1105 | P32004-2         | 6                    | 10             | 5.5                   | 1253   | 139517 | 6.2 | Isoform 2 of P32004                                                                                                                                                   |
| 1106 | Q10570           | 6                    | 12             | 5.5                   | 1443   | 160883 | 6.4 | Cleavage and polyadenylation specificity factor subunit 1                                                                                                             |
| 1107 | Q13464           | 6                    | 9              | 5.4                   | 1354   | 158174 | 5.9 | Rho-associated protein kinase 1                                                                                                                                       |
| 1107 | UPI000022A6D8    | 6                    | 9              | 5.4                   | 1354   | 158243 | 5.9 | Rho-associated protein kinase 1 (EC 2.7.11.1) (Rho-associated, coiled-coil-containing protein kinase 1) (p160 ROCK-1) (p160ROCK) (Renal carcinoma antigen NY-REN-35). |
| 1107 | Q2KHM4           | 6                    | 9              | 5.4                   | 1354   | 158127 | 5.9 | Rho-associated, coiled-coil containing protein kinase 1                                                                                                               |
| 1108 | Q92620           | 6                    | 15             | 5.4                   | 1227   | 140502 | 6.5 | Pre-mRNA-splicing factor ATP-dependent RNA helicase PRP16                                                                                                             |
| 1109 | O95239-2         | 6                    | 12             | 5.7                   | 1127   | 128459 | 6.2 | Isoform 2 of O95239                                                                                                                                                   |
| 1109 | O95239           | 6                    | 12             | 5.2                   | 1232   | 139881 | 6.3 | Chromosome-associated kinesin KIF4A                                                                                                                                   |
| 1110 | P42695           | 6                    | 27             | 5.1                   | 1498   | 168890 | 7.5 | Condensin-II complex subunit D3                                                                                                                                       |
| 1110 | UPI0000D626A5    | 6                    | 27             | 5.1                   | 1501   | 169232 | 7.6 | Condensin-II complex subunit D3 (Non-SMC condensin II complex subunit D3) (hCAP-D3).                                                                                  |
| 1111 | Q5VT25-3         | 6                    | 17             | 5.4                   | 1638   | 186112 | 6.3 | Isoform 3 of Q5VT25                                                                                                                                                   |
| 1111 | Q5VT25-5         | 6                    | 17             | 5.2                   | 1719   | 195921 | 6.5 | Isoform 5 of Q5VT25                                                                                                                                                   |
| 1111 | Q5VT25           | 6                    | 17             | 5.1                   | 1732   | 197306 | 6.6 | Serine/threonine-protein kinase MRCK alpha                                                                                                                            |
| 1111 | Q5VT25-2         | 6                    | 17             | 5.1                   | 1754   | 199809 | 6.4 | Isoform 2 of Q5VT25                                                                                                                                                   |
| 1112 | Q86UU1-2         | 6                    | 6              | 4.9                   | 1319   | 144739 | 8.6 | Isoform 2 of Q86UU1                                                                                                                                                   |
| 1113 | Q16363           | 6                    | 45             | 4.8                   | 1823   | 202527 | 6.3 | Laminin subunit alpha-4 precursor                                                                                                                                     |
| 1113 | Q5D044           | 6                    | 45             | 4.8                   | 1816   | 201882 | 6.3 | LAMA4 protein                                                                                                                                                         |
| 1113 | Q16363-2         | 6                    | 45             | 4.8                   | 1816   | 201779 | 6.3 | Isoform 2 of Q16363                                                                                                                                                   |
| 1114 | Q8IZN6           | 6                    | 20             | 4.7                   | 1278   | 144200 | 8.2 | ATP-binding cassette protein C4 splice variant A                                                                                                                      |
| 1114 | O15439           | 6                    | 20             | 4.5                   | 1325   | 149540 | 8.3 | Multidrug resistance-associated protein 4                                                                                                                             |
| 1114 | Q9BX28           | 6                    | 20             | 4.5                   | 1325   | 149526 | 8.2 | ATP-binding cassette, sub-family C (CFTR/MRP), member 4                                                                                                               |

| No.  | Accession Number | Unique Peptide Count | Spectrum Count | Sequence Coverage (%) | Length | MolWt  | pI  | Descriptive Name                                                                                                                                                                                                                                               |
|------|------------------|----------------------|----------------|-----------------------|--------|--------|-----|----------------------------------------------------------------------------------------------------------------------------------------------------------------------------------------------------------------------------------------------------------------|
| 1114 | Q8NEW8           | 6                    | 20             | 4.5                   | 1325   | 149355 | 8.3 | Multidrug resistance-associated protein                                                                                                                                                                                                                        |
| 1115 | Q69YN4           | 6                    | 9              | 4.2                   | 1810   | 201700 | 5   | Protein KIAA1429                                                                                                                                                                                                                                               |
| 1115 | UPI00001BBB23    | 6                    | 9              | 4.2                   | 1812   | 202023 | 5   | hypothetical protein LOC25962 isoform 1                                                                                                                                                                                                                        |
| 1115 | Q9P2B8           | 6                    | 9              | 4.2                   | 1795   | 200853 | 4.8 | KIAA1429 protein                                                                                                                                                                                                                                               |
| 1116 | Q7KZ85           | 6                    | 9              | 3.8                   | 1726   | 199071 | 4.9 | Transcription elongation factor SPT6                                                                                                                                                                                                                           |
| 1116 | UPI0000D622EF    | 6                    | 9              | 3.8                   | 1728   | 199271 | 4.9 | Transcription elongation factor SPT6 (hSPT6) (Tat-cotransactivator 2 protein) (Tat-CT2 protein).                                                                                                                                                               |
| 1117 | UPI0000D6119F    | 6                    | 15             | 4                     | 1734   | 198891 | 6.9 | proteasome (prosome, macropain) activator subunit 4                                                                                                                                                                                                            |
| 1117 | Q14997           | 6                    | 15             | 3.7                   | 1843   | 211332 | 6.9 | Proteasome activator complex subunit 4                                                                                                                                                                                                                         |
| 1118 | UPI000066D92A    | 6                    | 12             | 3.5                   | 1922   | 208475 | 4.7 | Tumor suppressor p53-binding protein 1 (p53-binding protein 1) (p53BP1) (53BP1).                                                                                                                                                                               |
| 1118 | Q12888           | 6                    | 12             | 3.4                   | 1972   | 213573 | 4.7 | Tumor suppressor p53-binding protein 1                                                                                                                                                                                                                         |
| 1119 | Q6MZL5           | 6                    | 6              | 3.9                   | 1694   | 195643 | 5.2 | Hypothetical protein DKFZp686C06243                                                                                                                                                                                                                            |
| 1119 | Q15643           | 6                    | 6              | 3.3                   | 1979   | 227637 | 5.3 | Thyroid receptor-interacting protein 11                                                                                                                                                                                                                        |
| 1119 | UPI000013D767    | 6                    | 6              | 3.3                   | 1979   | 227584 | 5.3 | Thyroid receptor-interacting protein 11 (TRIP-11) (Golgi-associated microtubule-binding protein 210) (GMAP-210) (Trip230) (Clonal evolution-related gene on chromosome 14).                                                                                    |
| 1120 | Q9BTC0           | 6                    | 22             | 3.3                   | 2240   | 243870 | 7.9 | Death-inducer obliterator 1                                                                                                                                                                                                                                    |
| 1120 | UPI000056322E    | 6                    | 22             | 3.3                   | 2240   | 243840 | 7.9 | death inducer-obliterator 1 isoform c                                                                                                                                                                                                                          |
| 1121 | Q0KKZ9           | 6                    | 19             | 3.2                   | 2090   | 239618 | 7   | Mib                                                                                                                                                                                                                                                            |
| 1121 | Q92508           | 6                    | 19             | 3.2                   | 2035   | 233040 | 6.9 | Protein FAM38A                                                                                                                                                                                                                                                 |
| 1122 | Q93008           | 6                    | 9              | 2.6                   | 2547   | 289539 | 5.7 | Probable ubiquitin carboxyl-terminal hydrolase FAF-X                                                                                                                                                                                                           |
| 1122 | UPI0000D61D4F    | 6                    | 9              | 2.6                   | 2563   | 291447 | 5.7 | Probable ubiquitin carboxyl-terminal hydrolase FAF-X (EC 3.1.2.15) (Ubiquitin thioesterase FAF-X) (Ubiquitin-specific-processing protease FAF-X) (Deubiquitinating enzyme FAF-X) (Fat facets protein-related, X-linked) (Ubiquitin-specific protease 9, X chro |
| 1122 | UPI0000D61D4E    | 6                    | 9              | 2.6                   | 2564   | 291492 | 5.8 | Probable ubiquitin carboxyl-terminal hydrolase FAF-X (EC 3.1.2.15) (Ubiquitin thioesterase FAF-X) (Ubiquitin-specific-processing protease FAF-X) (Deubiquitinating enzyme FAF-X) (Fat facets protein-related, X-linked) (Ubiquitin-specific protease 9, X chro |
| 1122 | UPI00006AB82F    | 6                    | 9              | 2.6                   | 2554   | 290495 | 5.8 | ubiquitin specific protease 9, X-linked isoform 4                                                                                                                                                                                                              |
| 1122 | UPI00006AB82E    | 6                    | 9              | 2.6                   | 2570   | 292312 | 5.8 | ubiquitin specific protease 9, X-linked isoform 3                                                                                                                                                                                                              |
| 1122 | Q93008-2         | 6                    | 9              | 2.6                   | 2563   | 291356 | 5.7 | Isoform Long of Q93008                                                                                                                                                                                                                                         |

| No.  | Accession Number | Unique Peptide Count | Spectrum Count | Sequence Coverage (%) | Length | MolWt   | pI   | Descriptive Name                                             |
|------|------------------|----------------------|----------------|-----------------------|--------|---------|------|--------------------------------------------------------------|
| 1123 | UPI000034ECE6    | 6                    | 8              | 2.3                   | 3097   | 346901  | 6.4  | triple functional domain (PTPRF interacting)                 |
| 1124 | P46939           | 6                    | 19             | 2                     | 3433   | 394495  | 5.3  | Utrophin                                                     |
| 1124 | UPI000049E05A    | 6                    | 19             | 2                     | 3433   | 394520  | 5.3  | Utrophin (Dystrophin-related protein 1) (DRP1) (DRP).        |
| 1124 | Q5SZ57           | 6                    | 19             | 2                     | 3433   | 394467  | 5.3  | Utrophin                                                     |
| 1125 | Q8WZ42           | 6                    | 12             | 0.2                   | 34350  | 3816081 | 6.3  | Titin                                                        |
| 1125 | Q8WZ42-8         | 6                    | 12             | 0.2                   | 34474  | 3829767 | 6.4  | Isoform 8 of Q8WZ42                                          |
| 1125 | Q8WZ42-2         | 6                    | 12             | 0.2                   | 34258  | 3805759 | 6.3  | Isoform 2 of Q8WZ42                                          |
| 1126 | P05387           | 5                    | 50             | 73.9                  | 115    | 11665   | 4.5  | 60S acidic ribosomal protein P2                              |
| 1127 | P18859           | 5                    | 12             | 65.7                  | 108    | 12587   | 9.5  | ATP synthase coupling factor 6, mitochondrial precursor      |
| 1128 | Q6IB68           | 5                    | 11             | 65                    | 103    | 11953   | 5.9  | MYCBP protein                                                |
| 1128 | Q99417           | 5                    | 11             | 65                    | 103    | 11967   | 5.9  | C-Myc-binding protein                                        |
| 1129 | Q9NS69           | 5                    | 67             | 62                    | 142    | 15522   | 4.3  | Mitochondrial import receptor subunit TOM22 homolog          |
| 1130 | P18085           | 5                    | 60             | 59.4                  | 180    | 20511   | 7.2  | ADP-ribosylation factor 4                                    |
| 1131 | P62314           | 5                    | 45             | 54.6                  | 119    | 13282   | 11.6 | Small nuclear ribonucleoprotein Sm D1                        |
| 1132 | P09132           | 5                    | 15             | 54.2                  | 144    | 16156   | 9.8  | Signal recognition particle 19 kDa protein                   |
| 1133 | P12236           | 5                    | 116            | 53                    | 298    | 32866   | 9.7  | ADP/ATP translocase 3                                        |
| 1134 | Q13526           | 5                    | 18             | 51.5                  | 163    | 18243   | 8.8  | Peptidyl-prolyl cis-trans isomerase NIMA-interacting 1       |
| 1135 | Q64152           | 5                    | 50             | 50                    | 204    | 22031   | 9.5  | Transcription factor BTF3                                    |
| 1135 | P20290           | 5                    | 50             | 49.5                  | 206    | 22168   | 9.4  | Transcription factor BTF3                                    |
| 1136 | P50583           | 5                    | 17             | 48.3                  | 147    | 16829   | 5.3  | Bis(5'-nucleosyl)-tetrphosphatase [asymmetrical]             |
| 1137 | Q9Y3B4           | 5                    | 28             | 48                    | 125    | 14585   | 9.4  | Pre-mRNA branch site protein p14                             |
| 1138 | O14737           | 5                    | 49             | 47.2                  | 125    | 14285   | 6    | Programmed cell death protein 5                              |
| 1139 | P31949           | 5                    | 83             | 46.7                  | 105    | 11740   | 7.2  | Protein S100-A11                                             |
| 1140 | Q15121           | 5                    | 60             | 44.6                  | 130    | 15040   | 5    | Astrocytic phosphoprotein PEA-15                             |
| 1140 | Q6FHL9           | 5                    | 60             | 44.6                  | 130    | 15068   | 5    | PEA15 protein                                                |
| 1141 | Q99584           | 5                    | 60             | 41.8                  | 98     | 11471   | 6.2  | Protein S100-A13                                             |
| 1142 | Q9BYN0           | 5                    | 11             | 41.6                  | 137    | 14259   | 8.2  | Sulfiredoxin-1                                               |
| 1143 | P0C0S5           | 5                    | 202            | 40.6                  | 128    | 13553   | 10.6 | Histone H2A.Z                                                |
| 1143 | Q71UI9           | 5                    | 202            | 40.6                  | 128    | 13509   | 10.6 | Histone H2AV                                                 |
| 1144 | P62330           | 5                    | 22             | 40.6                  | 175    | 20082   | 9    | ADP-ribosylation factor 6                                    |
| 1144 | Q5U025           | 5                    | 22             | 40.6                  | 175    | 20211   | 9    | ADP-ribosylation factor 6                                    |
| 1145 | P14927           | 5                    | 37             | 39.6                  | 111    | 13530   | 8.8  | Ubiquinol-cytochrome c reductase complex 14 kDa protein      |
| 1146 | P24666           | 5                    | 17             | 39.2                  | 158    | 18042   | 6.8  | Low molecular weight phosphotyrosine protein phosphatase     |
| 1146 | Q59EH3           | 5                    | 17             | 37.6                  | 165    | 18698   | 7.9  | Acid phosphatase 1 isoform c variant                         |
| 1147 | P82932           | 5                    | 24             | 39.2                  | 125    | 14227   | 9.3  | Mitochondrial 28S ribosomal protein S6                       |
| 1148 | P30405           | 5                    | 20             | 39.1                  | 207    | 22040   | 9.4  | Peptidyl-prolyl cis-trans isomerase, mitochondrial precursor |
| 1149 | Q4VC31           | 5                    | 16             | 38.9                  | 144    | 16620   | 7.8  | Coiled-coil domain-containing protein 58                     |
| 1150 | Q8IXM3           | 5                    | 27             | 38.7                  | 137    | 15383   | 9.6  | 39S ribosomal protein L41, mitochondrial precursor           |
| 1151 | O95881           | 5                    | 15             | 38.4                  | 172    | 19206   | 5.4  | Thioredoxin domain-containing protein 12 precursor           |

| No.  | Accession Number | Unique Peptide Count | Spectrum Count | Sequence Coverage (%) | Length | MolWt | pI   | Descriptive Name                                                                                                            |
|------|------------------|----------------------|----------------|-----------------------|--------|-------|------|-----------------------------------------------------------------------------------------------------------------------------|
| 1152 | P07741           | 5                    | 27             | 38.3                  | 180    | 19608 | 6    | Adenine phosphoribosyltransferase                                                                                           |
| 1153 | Q53GL9           | 5                    | 24             | 39                    | 428    | 49019 | 5.8  | HLA-B associated transcript 1 variant                                                                                       |
| 1153 | Q13838           | 5                    | 24             | 39                    | 428    | 48991 | 5.7  | Spliceosome RNA helicase BAT1                                                                                               |
| 1153 | Q0EFA1           | 5                    | 24             | 37.7                  | 443    | 50679 | 5.9  | BAT1 protein                                                                                                                |
| 1154 | P51970           | 5                    | 13             | 37.2                  | 172    | 20105 | 7.6  | NADH dehydrogenase [ubiquinone] 1 alpha subcomplex subunit 8                                                                |
| 1155 | P53680           | 5                    | 14             | 36.6                  | 142    | 17018 | 6.2  | AP-2 complex subunit sigma-1                                                                                                |
| 1156 | P01111           | 5                    | 12             | 36.5                  | 189    | 21229 | 5.2  | GTPase NRas precursor                                                                                                       |
| 1157 | P24534           | 5                    | 55             | 36.4                  | 225    | 24764 | 4.7  | Elongation factor 1-beta                                                                                                    |
| 1157 | UPI000013DA8E    | 5                    | 55             | 36.4                  | 225    | 24932 | 4.7  | PREDICTED: similar to eukaryotic translation elongation factor 1 beta 2                                                     |
| 1158 | P51571           | 5                    | 80             | 36.4                  | 173    | 18999 | 6.2  | Translocon-associated protein subunit delta precursor                                                                       |
| 1159 | P62263           | 5                    | 120            | 36.4                  | 151    | 16273 | 10.1 | 40S ribosomal protein S14                                                                                                   |
| 1160 | P07951-2         | 5                    | 25             | 36.3                  | 284    | 32990 | 4.7  | Isoform 2 of P07951                                                                                                         |
| 1161 | P61353           | 5                    | 44             | 36                    | 136    | 15798 | 10.6 | 60S ribosomal protein L27                                                                                                   |
| 1162 | Q96DE0           | 5                    | 7              | 35.4                  | 195    | 21273 | 6.9  | Nucleoside diphosphate-linked moiety X motif 16                                                                             |
| 1163 | Q9UBI1           | 5                    | 15             | 35.4                  | 195    | 22151 | 6    | COMM domain-containing protein 3                                                                                            |
| 1164 | P60033           | 5                    | 26             | 35.2                  | 236    | 25809 | 5.3  | CD81 antigen                                                                                                                |
| 1164 | UPI000066D8DE    | 5                    | 26             | 30.3                  | 274    | 29806 | 6.9  | CD81 antigen (26 kDa cell surface protein TAPA-1) (Target of the antiproliferative antibody 1) (Tetraspanin-28) (Tspan-28). |
| 1165 | O60493-4         | 5                    | 28             | 40                    | 140    | 16316 | 6.8  | Isoform 4 of O60493                                                                                                         |
| 1165 | O60493           | 5                    | 28             | 34.6                  | 162    | 18762 | 8.7  | Sorting nexin-3                                                                                                             |
| 1166 | P10301           | 5                    | 12             | 34.4                  | 218    | 23480 | 6.9  | Ras-related protein R-Ras precursor                                                                                         |
| 1167 | Q3MIH3           | 5                    | 263            | 34.4                  | 128    | 14728 | 9.8  | Ubiquitin A-52 residue ribosomal protein fusion product 1                                                                   |
| 1168 | P36404           | 5                    | 18             | 34.2                  | 184    | 20878 | 6.4  | ADP-ribosylation factor-like protein 2                                                                                      |
| 1169 | Q92572           | 5                    | 27             | 34.2                  | 193    | 21732 | 5.4  | AP-3 complex subunit sigma-1                                                                                                |
| 1170 | P55327           | 5                    | 14             | 33.7                  | 184    | 19863 | 5    | Tumor protein D52                                                                                                           |
| 1170 | Q6FGS3           | 5                    | 14             | 33.7                  | 184    | 19847 | 5    | TPD52 protein                                                                                                               |
| 1170 | UPI00005520F0    | 5                    | 14             | 30                    | 207    | 22477 | 5.4  | tumor protein D52 isoform 2                                                                                                 |
| 1170 | UPI0000D624DE    | 5                    | 14             | 29.7                  | 209    | 22635 | 5.4  | Tumor protein D52 (N8 protein).                                                                                             |
| 1170 | Q53EK8           | 5                    | 14             | 27.9                  | 222    | 23782 | 5.9  | N8 protein long isoform variant                                                                                             |
| 1170 | Q86YZ2           | 5                    | 14             | 27.7                  | 224    | 24327 | 4.8  | Prostate and colon associated protein                                                                                       |
| 1170 | UPI0000D624DF    | 5                    | 14             | 27.4                  | 226    | 24485 | 4.8  | Tumor protein D52 (N8 protein).                                                                                             |
| 1170 | Q9UCX8           | 5                    | 14             | 25                    | 248    | 26382 | 6.4  | N8 protein long isoform                                                                                                     |
| 1170 | UPI0000D624DD    | 5                    | 14             | 24.8                  | 250    | 26480 | 5.9  | Tumor protein D52 (N8 protein).                                                                                             |
| 1171 | Q9NRV9           | 5                    | 29             | 33.3                  | 189    | 21097 | 5.8  | Heme-binding protein 1                                                                                                      |
| 1172 | Q13765           | 5                    | 42             | 32.6                  | 215    | 23384 | 4.6  | Nascent polypeptide-associated complex subunit alpha                                                                        |
| 1173 | O75663           | 5                    | 9              | 32                    | 272    | 31444 | 5.9  | TIP41-like protein                                                                                                          |
| 1174 | Q9UMX5           | 5                    | 5              | 32                    | 172    | 18856 | 5.7  | Neudesin precursor                                                                                                          |
| 1175 | P15374           | 5                    | 18             | 31.3                  | 230    | 26183 | 4.9  | Ubiquitin carboxyl-terminal hydrolase isozyme L3                                                                            |

| No.  | Accession Number | Unique Peptide Count | Spectrum Count | Sequence Coverage (%) | Length | MolWt | pI   | Descriptive Name                                                                                                     |
|------|------------------|----------------------|----------------|-----------------------|--------|-------|------|----------------------------------------------------------------------------------------------------------------------|
| 1176 | UPI000045667B    | 5                    | 18             | 31.4                  | 185    | 20796 | 7    | Vacuolar protein sorting-associated protein 29 (Vesicle protein sorting 29) (hVPS29) (PEP11).                        |
| 1176 | Q6IAH3           | 5                    | 18             | 31.2                  | 186    | 20927 | 7    | VPS29 protein                                                                                                        |
| 1177 | P49207           | 5                    | 70             | 30.8                  | 117    | 13293 | 11.5 | 60S ribosomal protein L34                                                                                            |
| 1178 | Q15363           | 5                    | 81             | 30.8                  | 201    | 22761 | 5.2  | Transmembrane emp24 domain-containing protein 2 precursor                                                            |
| 1179 | Q9Y3D9           | 5                    | 10             | 30.5                  | 190    | 21771 | 8.9  | Mitochondrial ribosomal protein S23                                                                                  |
| 1180 | Q9Y3U8           | 5                    | 40             | 30.5                  | 105    | 12254 | 11.6 | 60S ribosomal protein L36                                                                                            |
| 1181 | Q9Y6A4           | 5                    | 12             | 30.1                  | 193    | 22774 | 9.8  | Uncharacterized protein C16orf80                                                                                     |
| 1182 | Q3T0Q6           | 5                    | 28             | 31.2                  | 170    | 18742 | 7.7  | Cellular nucleic acid-binding protein                                                                                |
| 1182 | Q4JGY1           | 5                    | 28             | 31                    | 171    | 18871 | 7.6  | Cellular nucleic acid binding protein beta variant 1                                                                 |
| 1182 | Q4JGY0           | 5                    | 28             | 30.8                  | 172    | 18970 | 7.6  | Cellular nucleic acid binding protein beta variant 2                                                                 |
| 1182 | P62633           | 5                    | 28             | 29.9                  | 177    | 19463 | 7.7  | Cellular nucleic acid-binding protein                                                                                |
| 1182 | P53996           | 5                    | 28             | 29.8                  | 178    | 19592 | 7.6  | Cellular nucleic acid-binding protein                                                                                |
| 1183 | UPI0000456547    | 5                    | 15             | 29.5                  | 224    | 24849 | 8.5  | Signal peptidase complex subunit 2 (EC 3.4.-.-) (Microsomal signal peptidase 25 kDa subunit) (SPase 25 kDa subunit). |
| 1183 | Q15005           | 5                    | 15             | 29.2                  | 226    | 25003 | 8.5  | Signal peptidase complex subunit 2                                                                                   |
| 1183 | UPI000047EFF7    | 5                    | 15             | 29.2                  | 226    | 24976 | 8    | hypothetical protein LOC653566                                                                                       |
| 1184 | Q53F20           | 5                    | 17             | 28.9                  | 266    | 30434 | 3.9  | Acidic (Leucine-rich) nuclear phosphoprotein 32 family, member E variant                                             |
| 1184 | Q9BTT0           | 5                    | 17             | 28.7                  | 268    | 30692 | 3.8  | Acidic leucine-rich nuclear phosphoprotein 32 family member E                                                        |
| 1185 | Q15382           | 5                    | 25             | 28.8                  | 184    | 20497 | 5.9  | GTP-binding protein Rheb precursor                                                                                   |
| 1185 | Q6NZ61           | 5                    | 25             | 28.8                  | 184    | 20558 | 5.9  | Ras homolog enriched in brain                                                                                        |
| 1186 | P68431           | 5                    | 49             | 28.7                  | 136    | 15404 | 11.1 | Histone H3.1                                                                                                         |
| 1186 | Q71DI3           | 5                    | 49             | 28.7                  | 136    | 15388 | 11.3 | Histone H3.2                                                                                                         |
| 1186 | Q16695           | 5                    | 49             | 28.7                  | 136    | 15508 | 11.1 | Histone H3.1t                                                                                                        |
| 1186 | P84243           | 5                    | 49             | 28.7                  | 136    | 15328 | 11.3 | Histone H3.3                                                                                                         |
| 1186 | UPI00006C1BEF    | 5                    | 49             | 27.5                  | 142    | 16181 | 10.6 | PREDICTED: similar to H3 histone, family 3B                                                                          |
| 1186 | UPI00006C029D    | 5                    | 49             | 21.7                  | 180    | 20527 | 10.2 | PREDICTED: similar to H3 histone, family 2 isoform 2                                                                 |
| 1187 | O00217           | 5                    | 16             | 28.6                  | 210    | 23705 | 6.3  | NADH dehydrogenase [ubiquinone] iron-sulfur protein 8, mitochondrial precursor                                       |
| 1188 | Q53S50           | 5                    | 16             | 30.1                  | 249    | 28345 | 6.5  | Hypothetical protein MTX2                                                                                            |
| 1188 | Q8IZ68           | 5                    | 16             | 29.6                  | 253    | 28823 | 6.5  | Metaxin 2                                                                                                            |
| 1188 | O75431           | 5                    | 16             | 28.5                  | 263    | 29763 | 6.3  | Metaxin-2                                                                                                            |
| 1189 | A0JLN5           | 5                    | 31             | 28.4                  | 169    | 19872 | 9.9  | Hypothetical protein                                                                                                 |
| 1189 | Q99442           | 5                    | 31             | 12                    | 399    | 45862 | 7.1  | Translocation protein SEC62                                                                                          |
| 1190 | Q53F35           | 5                    | 21             | 28.4                  | 250    | 28673 | 4.1  | Acidic (Leucine-rich) nuclear phosphoprotein 32 family, member B variant                                             |
| 1190 | Q92688           | 5                    | 21             | 28.3                  | 251    | 28788 | 4.1  | Acidic leucine-rich nuclear phosphoprotein 32 family member B                                                        |

| No.  | Accession Number | Unique Peptide Count | Spectrum Count | Sequence Coverage (%) | Length | MolWt | pI   | Descriptive Name                                                         |
|------|------------------|----------------------|----------------|-----------------------|--------|-------|------|--------------------------------------------------------------------------|
| 1191 | Q8N183           | 5                    | 12             | 28.4                  | 169    | 19856 | 9    | Mimitin, mitochondrial precursor                                         |
| 1192 | Q9UES0           | 5                    | 39             | 29.3                  | 191    | 21607 | 6.5  | SNARE protein Ykt6                                                       |
| 1192 | O15498           | 5                    | 39             | 28.3                  | 198    | 22418 | 6.9  | Synaptobrevin homolog YKT6                                               |
| 1193 | P24390           | 5                    | 36             | 28.3                  | 212    | 24542 | 8.6  | ER lumen protein retaining receptor 1                                    |
| 1194 | O43617           | 5                    | 17             | 27.8                  | 180    | 20274 | 5    | Trafficking protein particle complex subunit 3                           |
| 1195 | O43447           | 5                    | 18             | 27.7                  | 177    | 19208 | 8.1  | Peptidyl-prolyl cis-trans isomerase H                                    |
| 1196 | Q9UK41           | 5                    | 20             | 27.6                  | 221    | 25425 | 5.5  | Vacuolar protein sorting-associated protein 28 homolog                   |
| 1197 | O15145           | 5                    | 44             | 27.5                  | 178    | 20547 | 8.6  | Actin-related protein 2/3 complex subunit 3                              |
| 1197 | Q2LE71           | 5                    | 44             | 27.5                  | 178    | 20565 | 8.6  | Actin related protein 2/3 complex                                        |
| 1198 | O14735           | 5                    | 16             | 27.2                  | 213    | 23539 | 8    | CDP-diacylglycerol--inositol 3-phosphatidyltransferase                   |
| 1198 | Q53HA5           | 5                    | 16             | 27.2                  | 213    | 23558 | 8.3  | CDP-diacylglycerol--inositol 3-phosphatidyltransferase isoform 1 variant |
| 1199 | Q15181           | 5                    | 23             | 27                    | 289    | 32660 | 5.9  | Inorganic pyrophosphatase                                                |
| 1200 | Q13442           | 5                    | 19             | 26.5                  | 181    | 20630 | 8.9  | 28 kDa heat- and acid-stable phosphoprotein                              |
| 1201 | P83881           | 5                    | 47             | 26.4                  | 106    | 12441 | 10.6 | 60S ribosomal protein L36a                                               |
| 1201 | UPI00006C193F    | 5                    | 47             | 26.4                  | 106    | 12366 | 10.4 | PREDICTED: similar to large subunit ribosomal protein L36a               |
| 1201 | UPI00001AFE47    | 5                    | 47             | 26.4                  | 106    | 12475 | 10.4 | PREDICTED: similar to large subunit ribosomal protein L36a               |
| 1201 | UPI000016174B    | 5                    | 47             | 26.4                  | 106    | 12338 | 10.3 | PREDICTED: similar to large subunit ribosomal protein L36a               |
| 1202 | Q15056-2         | 5                    | 31             | 28.1                  | 228    | 25200 | 8.1  | Isoform Short of Q15056                                                  |
| 1202 | Q15056           | 5                    | 31             | 25.8                  | 248    | 27385 | 7.2  | Eukaryotic translation initiation factor 4H                              |
| 1203 | A3KFL4           | 5                    | 9              | 25.5                  | 263    | 29408 | 7.2  | Exosome component 2                                                      |
| 1203 | Q13868           | 5                    | 9              | 22.9                  | 293    | 32789 | 7.5  | Exosome complex exonuclease RRP4                                         |
| 1204 | O00629           | 5                    | 27             | 25.5                  | 521    | 57887 | 5    | Importin alpha-4 subunit                                                 |
| 1205 | P68402           | 5                    | 30             | 25.3                  | 229    | 25569 | 5.9  | Platelet-activating factor acetylhydrolase IB subunit beta               |
| 1206 | Q9H9B4           | 5                    | 23             | 24.8                  | 322    | 35619 | 9.1  | Sideroflexin-1                                                           |
| 1207 | Q5U071           | 5                    | 24             | 24.5                  | 208    | 23905 | 8.1  | High-mobility group box 2                                                |
| 1207 | P26583           | 5                    | 24             | 24.4                  | 209    | 24034 | 7.8  | High mobility group protein B2                                           |
| 1208 | Q13151           | 5                    | 48             | 23.6                  | 305    | 30841 | 9.3  | Heterogeneous nuclear ribonucleoprotein A0                               |
| 1209 | Q13155           | 5                    | 21             | 23.4                  | 320    | 35349 | 8.2  | Multisynthetase complex auxiliary component p38                          |
| 1210 | Q969G5           | 5                    | 11             | 23.4                  | 261    | 27642 | 6.2  | Protein kinase C delta-binding protein                                   |
| 1210 | UPI000013E910    | 5                    | 11             | 23.4                  | 261    | 27701 | 6.4  | protein kinase C, delta binding protein                                  |
| 1211 | UPI00006C03E4    | 5                    | 26             | 57.5                  | 106    | 12581 | 9.4  | PREDICTED: similar to FUS interacting protein (serine-arginine rich) 1   |
| 1211 | Q5JRI1           | 5                    | 26             | 35.5                  | 172    | 20913 | 10.5 | FUS interacting protein (Serine/arginine-rich) 1                         |
| 1211 | Q5JRI2           | 5                    | 26             | 35.3                  | 173    | 21000 | 10.5 | FUS interacting protein (Serine/arginine-rich) 1                         |
| 1211 | Q5JRI3           | 5                    | 26             | 33.5                  | 182    | 22135 | 10.3 | FUS interacting protein (Serine/arginine-rich) 1                         |
| 1211 | Q5JRI4           | 5                    | 26             | 33.3                  | 183    | 22222 | 10.3 | FUS interacting protein (Serine/arginine-rich) 1                         |



| No.  | Accession Number | Unique Peptide Count | Spectrum Count | Sequence Coverage (%) | Length | MolWt | pI   | Descriptive Name                                                                                                                                                                                                                                                                 |
|------|------------------|----------------------|----------------|-----------------------|--------|-------|------|----------------------------------------------------------------------------------------------------------------------------------------------------------------------------------------------------------------------------------------------------------------------------------|
| 1211 | UPI0000DD7961    | 5                    | 26             | 25                    | 244    | 29195 | 11.1 | PREDICTED: similar to FUS-interacting serine-arginine-rich protein 1 (TLS-associated protein with Ser-Arg repeats) (TLS-associated protein with SR repeats) (TASR) (TLS-associated serine-arginine protein) (TLS-associated SR protein) (Neural-specific SR protein... isoform 3 |
| 1211 | Q5JRI0           | 5                    | 26             | 23.4                  | 261    | 31213 | 11.3 | FUS interacting protein (Serine/arginine-rich) 1                                                                                                                                                                                                                                 |
| 1211 | O75494           | 5                    | 26             | 23.3                  | 262    | 31301 | 11.3 | FUS-interacting serine-arginine-rich protein 1                                                                                                                                                                                                                                   |
| 1211 | Q53GD7           | 5                    | 26             | 23.3                  | 262    | 31282 | 11.3 | FUS interacting protein (Serine-arginine rich) 1 isoform 2 variant                                                                                                                                                                                                               |
| 1212 | Q3B7K3           | 5                    | 14             | 23.2                  | 267    | 30368 | 9    | IKIP protein                                                                                                                                                                                                                                                                     |
| 1213 | Q502X2           | 5                    | 14             | 23.1                  | 186    | 21233 | 4.8  | Diablo homolog                                                                                                                                                                                                                                                                   |
| 1213 | Q9NR28           | 5                    | 14             | 18                    | 239    | 27131 | 5.9  | Diablo homolog, mitochondrial precursor                                                                                                                                                                                                                                          |
| 1214 | P01584           | 5                    | 10             | 22.7                  | 269    | 30748 | 4.8  | Interleukin-1 beta precursor                                                                                                                                                                                                                                                     |
| 1214 | Q53X59           | 5                    | 10             | 22.7                  | 269    | 30747 | 4.9  | IL1B protein                                                                                                                                                                                                                                                                     |
| 1215 | P52815           | 5                    | 34             | 22.7                  | 198    | 21348 | 8.9  | 39S ribosomal protein L12, mitochondrial precursor                                                                                                                                                                                                                               |
| 1216 | O95292           | 5                    | 51             | 22.6                  | 243    | 27228 | 7.3  | Vesicle-associated membrane protein-associated protein B/C                                                                                                                                                                                                                       |
| 1217 | Q8IWR8           | 5                    | 61             | 25.4                  | 173    | 20820 | 11.4 | Ribosomal protein L19                                                                                                                                                                                                                                                            |
| 1217 | UPI0000192A4A    | 5                    | 61             | 22.6                  | 195    | 23335 | 11.5 | 60S ribosomal protein L19.                                                                                                                                                                                                                                                       |
| 1217 | P84098           | 5                    | 61             | 22.4                  | 196    | 23466 | 11.5 | 60S ribosomal protein L19                                                                                                                                                                                                                                                        |
| 1217 | Q53G49           | 5                    | 61             | 22.4                  | 196    | 23467 | 11.4 | Ribosomal protein L19 variant                                                                                                                                                                                                                                                    |
| 1218 | Q9BUN8           | 5                    | 12             | 22.3                  | 251    | 28801 | 9.5  | Derlin-1                                                                                                                                                                                                                                                                         |
| 1219 | Q9Y3A6           | 5                    | 22             | 22.3                  | 229    | 26005 | 4.8  | Transmembrane emp24 domain-containing protein 5 precursor                                                                                                                                                                                                                        |
| 1220 | P31431           | 5                    | 26             | 22.2                  | 198    | 21642 | 4.5  | Syndecan-4 precursor                                                                                                                                                                                                                                                             |
| 1220 | Q53FN9           | 5                    | 26             | 22.2                  | 198    | 21608 | 4.5  | Syndecan 4 variant                                                                                                                                                                                                                                                               |
| 1221 | Q07021           | 5                    | 30             | 22                    | 282    | 31362 | 4.8  | Complement component 1 Q subcomponent-binding protein, mitochondrial precursor                                                                                                                                                                                                   |
| 1222 | P61421           | 5                    | 12             | 21.9                  | 351    | 40329 | 5    | Vacuolar ATP synthase subunit d                                                                                                                                                                                                                                                  |
| 1223 | Q9BWM7           | 5                    | 17             | 21.8                  | 321    | 35503 | 9.1  | Sideroflexin-3                                                                                                                                                                                                                                                                   |
| 1223 | UPI00004563F7    | 5                    | 17             | 21.5                  | 325    | 35979 | 9    | Sideroflexin-3.                                                                                                                                                                                                                                                                  |
| 1223 | UPI000006EE3D    | 5                    | 17             | 21.5                  | 325    | 35979 | 9.1  | sideroflexin 3                                                                                                                                                                                                                                                                   |
| 1224 | A4D0R4           | 5                    | 8              | 21.7                  | 240    | 28191 | 9.6  | B-cell receptor-associated protein 29                                                                                                                                                                                                                                            |
| 1224 | Q9UHQ4           | 5                    | 8              | 21.6                  | 241    | 28320 | 9.5  | B-cell receptor-associated protein 29                                                                                                                                                                                                                                            |
| 1224 | UPI000049A623    | 5                    | 8              | 21.3                  | 244    | 28731 | 9.5  | B-cell receptor-associated protein BAP29 isoform d                                                                                                                                                                                                                               |
| 1224 | UPI000049A622    | 5                    | 8              | 15.4                  | 337    | 39102 | 9.3  | B-cell receptor-associated protein BAP29 isoform c                                                                                                                                                                                                                               |
| 1224 | UPI000049A621    | 5                    | 8              | 14.9                  | 348    | 40797 | 9.7  | B-cell receptor-associated protein BAP29 isoform a                                                                                                                                                                                                                               |
| 1225 | Q9UJ70           | 5                    | 20             | 21.5                  | 344    | 37376 | 6.2  | N-acetylglucosamine kinase                                                                                                                                                                                                                                                       |
| 1226 | Q6IBT1           | 5                    | 54             | 21.3                  | 277    | 29937 | 7.7  | Proteasome subunit beta type                                                                                                                                                                                                                                                     |
| 1226 | Q99436           | 5                    | 54             | 21.3                  | 277    | 29965 | 7.7  | Proteasome subunit beta type 7 precursor                                                                                                                                                                                                                                         |
| 1226 | Q86U62           | 5                    | 54             | 21.3                  | 277    | 30018 | 8    | Proteasome (Prosome, macropain) subunit, beta type, 7                                                                                                                                                                                                                            |
| 1227 | Q9H690           | 5                    | 26             | 24.7                  | 291    | 32973 | 7.5  | CDNA: FLJ22484 fis, clone HRC10868                                                                                                                                                                                                                                               |

| No.  | Accession Number | Unique Peptide Count | Spectrum Count | Sequence Coverage (%) | Length | MolWt | pI  | Descriptive Name                                                                                                                                                                                    |
|------|------------------|----------------------|----------------|-----------------------|--------|-------|-----|-----------------------------------------------------------------------------------------------------------------------------------------------------------------------------------------------------|
| 1227 | Q9GZY8           | 5                    | 26             | 21.1                  | 342    | 38465 | 9   | Uncharacterized protein C2orf33                                                                                                                                                                     |
| 1228 | Q68D08           | 5                    | 9              | 21                    | 324    | 36750 | 6.1 | Hypothetical protein DKFZp686B04128                                                                                                                                                                 |
| 1228 | Q9NUQ9           | 5                    | 9              | 21                    | 324    | 36748 | 6.1 | Protein FAM49B                                                                                                                                                                                      |
| 1229 | Q99426           | 5                    | 28             | 20.9                  | 244    | 27326 | 5.1 | Tubulin folding cofactor B                                                                                                                                                                          |
| 1230 | O15260-2         | 5                    | 117            | 35.2                  | 159    | 17970 | 6.1 | Isoform 2 of O15260                                                                                                                                                                                 |
| 1230 | UPI0000D6193B    | 5                    | 117            | 30.1                  | 186    | 21115 | 7.2 | Surfeit locus protein 4.                                                                                                                                                                            |
| 1230 | Q5T8U5           | 5                    | 117            | 30.1                  | 186    | 21128 | 6.5 | Surfeit 4                                                                                                                                                                                           |
| 1230 | Q5T8U7           | 5                    | 117            | 29.8                  | 188    | 21130 | 8.6 | Surfeit 4                                                                                                                                                                                           |
| 1230 | UPI0000D6193C    | 5                    | 117            | 29.5                  | 190    | 21331 | 8.6 | Surfeit locus protein 4.                                                                                                                                                                            |
| 1230 | O15260           | 5                    | 117            | 20.8                  | 269    | 30394 | 7.8 | Surfeit locus protein 4                                                                                                                                                                             |
| 1231 | Q16836           | 5                    | 28             | 20.4                  | 314    | 34278 | 8.9 | Hydroxyacyl-coenzyme A dehydrogenase, mitochondrial precursor                                                                                                                                       |
| 1231 | UPI000013EECF    | 5                    | 28             | 20.4                  | 314    | 34294 | 8.9 | L-3-hydroxyacyl-Coenzyme A dehydrogenase precursor                                                                                                                                                  |
| 1231 | UPI000013D5C7    | 5                    | 28             | 16.4                  | 390    | 42123 | 9.3 | Hydroxyacyl-coenzyme A dehydrogenase, mitochondrial precursor (EC 1.1.1.35) (Short chain 3-hydroxyacyl-CoA dehydrogenase) (HCDH) (Medium and short chain L-3-hydroxyacyl-coenzyme A dehydrogenase). |
| 1231 | Q16836-2         | 5                    | 28             | 16.4                  | 390    | 42123 | 9.3 | Isoform 2 of Q16836                                                                                                                                                                                 |
| 1232 | P61163           | 5                    | 24             | 20.2                  | 376    | 42614 | 6.6 | Alpha-centractin                                                                                                                                                                                    |
| 1233 | O75323           | 5                    | 18             | 19.6                  | 286    | 33743 | 9.4 | Protein NipSnap2                                                                                                                                                                                    |
| 1234 | Q5U000           | 5                    | 26             | 19.5                  | 303    | 33868 | 7.1 | Cathepsin Z                                                                                                                                                                                         |
| 1235 | P11908           | 5                    | 22             | 19.2                  | 318    | 34769 | 6.6 | Ribose-phosphate pyrophosphokinase II                                                                                                                                                               |
| 1235 | Q0VDI0           | 5                    | 22             | 19                    | 321    | 35054 | 6.4 | Phosphoribosyl pyrophosphate synthetase 2                                                                                                                                                           |
| 1236 | P08574           | 5                    | 14             | 19.1                  | 325    | 35390 | 9   | Cytochrome c1 heme protein, mitochondrial precursor                                                                                                                                                 |
| 1236 | UPI000014046B    | 5                    | 14             | 19.1                  | 325    | 35422 | 9   | Cytochrome c1 heme protein, mitochondrial precursor (Cytochrome c-1).                                                                                                                               |
| 1237 | P46926           | 5                    | 8              | 19                    | 289    | 32668 | 6.9 | Glucosamine-6-phosphate isomerase                                                                                                                                                                   |
| 1238 | P18754           | 5                    | 13             | 18.8                  | 421    | 44969 | 7.5 | Regulator of chromosome condensation                                                                                                                                                                |
| 1238 | UPI0000E26242    | 5                    | 13             | 18                    | 438    | 46753 | 8.1 | regulator of chromosome condensation 1 isoform b                                                                                                                                                    |
| 1238 | Q6NT97           | 5                    | 13             | 17.5                  | 452    | 48146 | 8.2 | Regulator of chromosome condensation 1                                                                                                                                                              |
| 1239 | Q5QPQ6           | 5                    | 11             | 20.3                  | 300    | 31735 | 7.6 | 3-hydroxymethyl-3-methylglutaryl-Coenzyme A lyase                                                                                                                                                   |
| 1239 | P35914           | 5                    | 11             | 18.8                  | 325    | 34360 | 8.5 | Hydroxymethylglutaryl-CoA lyase, mitochondrial precursor                                                                                                                                            |
| 1240 | Q5T5B4           | 5                    | 12             | 18.8                  | 368    | 40781 | 6.3 | Serine/threonine kinase 24                                                                                                                                                                          |
| 1240 | Q6P0Y1           | 5                    | 12             | 16                    | 431    | 47941 | 5.4 | Serine/threonine kinase 24                                                                                                                                                                          |
| 1240 | Q5U0E6           | 5                    | 12             | 16                    | 431    | 47913 | 5.4 | Serine/threonine kinase 24                                                                                                                                                                          |
| 1240 | Q9Y6E0           | 5                    | 12             | 15.6                  | 443    | 49308 | 5.7 | Serine/threonine-protein kinase 24                                                                                                                                                                  |
| 1241 | P09486           | 5                    | 13             | 18.5                  | 303    | 34632 | 4.8 | SPARC precursor                                                                                                                                                                                     |
| 1242 | Q9HC38-2         | 5                    | 10             | 18.5                  | 298    | 33233 | 5.6 | Isoform 2 of Q9HC38                                                                                                                                                                                 |
| 1242 | UPI000006E21F    | 5                    | 10             | 18.5                  | 298    | 33249 | 5.6 | glyoxalase domain containing 4                                                                                                                                                                      |
| 1242 | Q9Y3E8           | 5                    | 10             | 10.9                  | 504    | 55012 | 8.7 | Uncharacterized protein C17orf25                                                                                                                                                                    |
| 1243 | Q5JTA8           | 5                    | 21             | 18.4                  | 250    | 28743 | 10  | Novel protein                                                                                                                                                                                       |
| 1243 | Q9H0U3           | 5                    | 21             | 13.7                  | 335    | 38037 | 9.6 | Implantation-associated protein precursor                                                                                                                                                           |

| No.  | Accession Number | Unique Peptide Count | Spectrum Count | Sequence Coverage (%) | Length | MolWt | pI  | Descriptive Name                                                                              |
|------|------------------|----------------------|----------------|-----------------------|--------|-------|-----|-----------------------------------------------------------------------------------------------|
| 1244 | P53597           | 5                    | 34             | 18.3                  | 333    | 35047 | 8.9 | Succinyl-CoA ligase [GDP-forming] subunit alpha, mitochondrial precursor                      |
| 1244 | UPI000014BF59    | 5                    | 34             | 17.6                  | 346    | 36250 | 8.8 | succinate-CoA ligase, GDP-forming, alpha subunit                                              |
| 1245 | Q59EL5           | 5                    | 29             | 21.9                  | 260    | 29156 | 7   | Aldo-keto reductase family 1, member B1 variant                                               |
| 1245 | P15121           | 5                    | 29             | 18                    | 316    | 35853 | 7   | Aldose reductase                                                                              |
| 1246 | Q8WWC4           | 5                    | 11             | 17.9                  | 291    | 32545 | 9.2 | Uncharacterized protein C2orf47                                                               |
| 1246 | Q9H671           | 5                    | 11             | 17.9                  | 291    | 32487 | 9.3 | CDNA: FLJ22555 fis, clone HSI01193                                                            |
| 1247 | O95433           | 5                    | 19             | 17.8                  | 338    | 38274 | 5.5 | Activator of 90 kDa heat shock protein ATPase homolog 1                                       |
| 1248 | UPI0000202E29    | 5                    | 21             | 33.2                  | 205    | 22764 | 5.5 | basigin isoform 4                                                                             |
| 1248 | P35613           | 5                    | 21             | 17.7                  | 385    | 42200 | 5.7 | Basigin precursor                                                                             |
| 1249 | P06737           | 5                    | 19             | 16.9                  | 847    | 97149 | 7.2 | Glycogen phosphorylase, liver form                                                            |
| 1249 | UPI0000D62406    | 5                    | 19             | 16.8                  | 849    | 97334 | 7.2 | Glycogen phosphorylase, liver form (EC 2.4.1.1).                                              |
| 1250 | Q96C36           | 5                    | 9              | 16.9                  | 320    | 33637 | 7.8 | Pyrroline-5-carboxylate reductase 2                                                           |
| 1251 | Q9NZ01           | 5                    | 45             | 16.9                  | 308    | 36034 | 9.4 | Synaptic glycoprotein SC2                                                                     |
| 1252 | Q9Y394-2         | 5                    | 7              | 19.7                  | 289    | 32268 | 8.9 | Isoform 2 of Q9Y394                                                                           |
| 1252 | Q9Y394           | 5                    | 7              | 16.8                  | 339    | 38299 | 8.3 | Dehydrogenase/reductase SDR family member 7 precursor                                         |
| 1253 | Q5SQ52           | 5                    | 19             | 19.4                  | 186    | 21609 | 4.9 | Casein kinase 2, beta polypeptide                                                             |
| 1253 | P67870           | 5                    | 19             | 16.7                  | 215    | 24942 | 5.6 | Casein kinase II subunit beta                                                                 |
| 1253 | Q5SRQ6           | 5                    | 19             | 15.4                  | 234    | 26926 | 6   | Casein kinase 2, beta polypeptide                                                             |
| 1254 | UPI00006C1BBA    | 5                    | 21             | 16.7                  | 305    | 35024 | 8.6 | PREDICTED: similar to Ran-specific GTPase-activating protein (Ran-binding protein 1) (RanBP1) |
| 1255 | Q6YN16           | 5                    | 10             | 16.5                  | 418    | 45395 | 8   | Hydroxysteroid dehydrogenase-like protein 2                                                   |
| 1255 | UPI0000D618EF    | 5                    | 10             | 16.5                  | 417    | 45361 | 8.4 | hydroxysteroid dehydrogenase like 2                                                           |
| 1256 | Q9Y3B3           | 5                    | 15             | 29.5                  | 224    | 25172 | 6.9 | Transmembrane emp24 domain-containing protein 7 precursor                                     |
| 1256 | Q6JUT2           | 5                    | 15             | 16.3                  | 404    | 46173 | 5.1 | Toll-like receptor adapter molecule 2                                                         |
| 1257 | Q9Y570           | 5                    | 13             | 16.1                  | 386    | 42315 | 6   | Protein phosphatase methylesterase 1                                                          |
| 1257 | UPI0000D62652    | 5                    | 13             | 15.9                  | 389    | 42669 | 5.8 | Protein phosphatase methylesterase 1 (EC 3.1.1.-) (PME-1).                                    |
| 1258 | P21283           | 5                    | 27             | 16                    | 382    | 43942 | 7.5 | Vacuolar ATP synthase subunit C                                                               |
| 1259 | Q8NCJ3           | 5                    | 8              | 15.7                  | 413    | 46904 | 7.1 | CDNA FLJ90220 fis, clone MAMMA1003126, moderately similar to Human Hpast (HPAST) mRNA         |
| 1259 | Q9NZN4           | 5                    | 8              | 12                    | 543    | 61161 | 6.5 | EH domain-containing protein 2                                                                |
| 1260 | Q6E0B2           | 5                    | 16             | 15.5                  | 476    | 52627 | 6.7 | Small intestine SPAK-like kinase                                                              |

| No.  | Accession Number | Unique Peptide Count | Spectrum Count | Sequence Coverage (%) | Length | MolWt | pI  | Descriptive Name                                                                                                                          |
|------|------------------|----------------------|----------------|-----------------------|--------|-------|-----|-------------------------------------------------------------------------------------------------------------------------------------------|
| 1260 | UPI000049DF21    | 5                    | 16             | 13.6                  | 545    | 59524 | 6.4 | STE20/SPS1-related proline-alanine-rich protein kinase (EC 2.7.11.1) (Ste-20-related kinase) (Serine/threonine-protein kinase 39) (DCHT). |
| 1260 | UPI000013D46D    | 5                    | 16             | 13.6                  | 545    | 59474 | 6.3 | serine threonine kinase 39 (STE20/SPS1 homolog, yeast)                                                                                    |
| 1260 | Q9UEW8           | 5                    | 16             | 13.5                  | 547    | 59642 | 6.3 | STE20/SPS1-related proline-alanine-rich protein kinase                                                                                    |
| 1261 | Q9Y305           | 5                    | 9              | 15.5                  | 406    | 46355 | 8   | Acyl-coenzyme A thioesterase 9                                                                                                            |
| 1261 | UPI0000D61D39    | 5                    | 9              | 14.5                  | 434    | 49270 | 8.3 | Acyl-coenzyme A thioesterase 9 (EC 3.1.2.-) (Acyl-CoA thioesterase 9) (Acyl-CoA thioester hydrolase 9).                                   |
| 1261 | UPI000013F264    | 5                    | 9              | 14.4                  | 439    | 49902 | 8.6 | acyl-Coenzyme A thioesterase 2, mitochondrial isoform b                                                                                   |
| 1261 | UPI0000D61D38    | 5                    | 9              | 14.2                  | 445    | 50474 | 8.4 | Acyl-coenzyme A thioesterase 9 (EC 3.1.2.-) (Acyl-CoA thioesterase 9) (Acyl-CoA thioester hydrolase 9).                                   |
| 1261 | UPI00003D7D31    | 5                    | 9              | 14.1                  | 448    | 50851 | 8.5 | acyl-Coenzyme A thioesterase 2, mitochondrial isoform a                                                                                   |
| 1262 | Q4VX89           | 5                    | 9              | 15.2                  | 453    | 50354 | 7.5 | HBS1-like                                                                                                                                 |
| 1262 | Q9Y450           | 5                    | 9              | 10.1                  | 684    | 75473 | 6.6 | HBS1-like protein                                                                                                                         |
| 1263 | Q9H488           | 5                    | 9              | 15.2                  | 388    | 43956 | 8.5 | GDP-fucose protein O-fucosyltransferase 1 precursor                                                                                       |
| 1264 | O95232           | 5                    | 13             | 15                    | 432    | 51466 | 9.8 | Cisplatin resistance-associated overexpressed protein                                                                                     |
| 1265 | P12955           | 5                    | 11             | 15                    | 493    | 54548 | 6   | Xaa-Pro dipeptidase                                                                                                                       |
| 1266 | P55036           | 5                    | 18             | 14.9                  | 377    | 40737 | 4.8 | 26S proteasome non-ATPase regulatory subunit 4                                                                                            |
| 1266 | Q5VWC4           | 5                    | 18             | 14.7                  | 380    | 41079 | 4.8 | Proteasome (Prosome, macropain) 26S subunit, non-ATPase, 4                                                                                |
| 1267 | P17174           | 5                    | 11             | 14.8                  | 413    | 46248 | 7   | Aspartate aminotransferase, cytoplasmic                                                                                                   |
| 1267 | Q2TU84           | 5                    | 11             | 14.8                  | 413    | 46320 | 6.8 | Growth-inhibiting protein 18                                                                                                              |
| 1268 | Q1WAI7           | 5                    | 7              | 14.1                  | 306    | 34583 | 6.5 | Methionine adenosyltransferase II beta variant 2                                                                                          |
| 1268 | Q9UJ54           | 5                    | 7              | 13.3                  | 323    | 36401 | 6.7 | DTDP-4-keto-6-deoxy-D-glucose 4-reductase                                                                                                 |
| 1268 | Q9BS89           | 5                    | 7              | 13.3                  | 323    | 36431 | 6.7 | Methionine adenosyltransferase II, beta                                                                                                   |
| 1268 | Q9NZL9           | 5                    | 7              | 12.9                  | 334    | 37552 | 7.4 | Methionine adenosyltransferase regulatory beta subunit                                                                                    |
| 1268 | Q567T7           | 5                    | 7              | 12.9                  | 334    | 37480 | 7.6 | Methionine adenosyltransferase 2 beta                                                                                                     |
| 1269 | Q7Z4X0           | 5                    | 15             | 14.1                  | 341    | 39774 | 7.5 | MO25-like protein                                                                                                                         |
| 1269 | Q9Y376           | 5                    | 15             | 14.1                  | 341    | 39869 | 6.9 | Calcium-binding protein 39                                                                                                                |
| 1270 | UPI0000208801    | 5                    | 15             | 15.3                  | 437    | 45880 | 5.6 | trans-golgi network protein 2                                                                                                             |
| 1270 | Q96QL2           | 5                    | 15             | 15.3                  | 437    | 45866 | 5.6 | Trans-golgi network protein 2                                                                                                             |
| 1270 | O43493-2         | 5                    | 15             | 15.3                  | 437    | 45774 | 5.6 | Isoform TGN46 of O43493                                                                                                                   |
| 1270 | Q8N6T8           | 5                    | 15             | 15                    | 447    | 47058 | 5.6 | TGOLN2 protein                                                                                                                            |
| 1270 | UPI000020880A    | 5                    | 15             | 14.8                  | 453    | 47774 | 6   | Trans-Golgi network integral membrane protein 2 precursor (Trans-Golgi network protein TGN51) (TGN46) (TGN48) (TGN38 homolog).            |
| 1270 | O43493-3         | 5                    | 15             | 14.8                  | 453    | 47592 | 6   | Isoform TGN48 of O43493                                                                                                                   |

| No.  | Accession Number | Unique Peptide Count | Spectrum Count | Sequence Coverage (%) | Length | MolWt | pI  | Descriptive Name                                                                                                                                                                                                                                                |
|------|------------------|----------------------|----------------|-----------------------|--------|-------|-----|-----------------------------------------------------------------------------------------------------------------------------------------------------------------------------------------------------------------------------------------------------------------|
| 1270 | O43493           | 5                    | 15             | 14                    | 480    | 51007 | 5.7 | Trans-Golgi network integral membrane protein 2 precursor                                                                                                                                                                                                       |
| 1271 | Q8N8S7-2         | 5                    | 7              | 14.6                  | 570    | 63925 | 6.4 | Isoform 2 of Q8N8S7                                                                                                                                                                                                                                             |
| 1271 | Q8N8S7           | 5                    | 7              | 14                    | 591    | 66510 | 6.9 | Protein enabled homolog                                                                                                                                                                                                                                         |
| 1272 | Q9UNF1           | 5                    | 5              | 14                    | 606    | 64954 | 9.3 | Melanoma-associated antigen D2                                                                                                                                                                                                                                  |
| 1273 | Q15645           | 5                    | 13             | 13.9                  | 432    | 48551 | 6.1 | Thyroid receptor-interacting protein 13                                                                                                                                                                                                                         |
| 1274 | Q9BXS5           | 5                    | 9              | 15.4                  | 423    | 48587 | 7.3 | AP-1 complex subunit mu-1                                                                                                                                                                                                                                       |
| 1274 | Q59EK3           | 5                    | 9              | 13.9                  | 466    | 53263 | 8.9 | Adaptor-related protein complex 1, mu 1 subunit variant                                                                                                                                                                                                         |
| 1275 | O43837           | 5                    | 5              | 13.8                  | 385    | 42212 | 8.5 | Isocitrate dehydrogenase [NAD] subunit beta, mitochondrial precursor (EC 1.1.1.41) (Isocitric dehydrogenase) (NAD(+)-specific ICDH)                                                                                                                             |
| 1275 | UPI00004709E4    | 5                    | 5              | 13.7                  | 387    | 42411 | 8.5 | Isocitrate dehydrogenase [NAD] subunit beta, mitochondrial precursor (EC 1.1.1.41) (Isocitric dehydrogenase) (NAD(+)-specific ICDH).                                                                                                                            |
| 1276 | UPI00002371B1    | 5                    | 13             | 15.3                  | 406    | 45169 | 9.2 | DEAD (Asp-Glu-Ala-Asp) box polypeptide 47 isoform 2                                                                                                                                                                                                             |
| 1276 | Q53GJ1           | 5                    | 13             | 13.8                  | 448    | 49882 | 9.2 | DEAD (Asp-Glu-Ala-Asp) box polypeptide 47 isoform 1 variant                                                                                                                                                                                                     |
| 1276 | Q9H0S4           | 5                    | 13             | 13.6                  | 455    | 50647 | 9.1 | Probable ATP-dependent RNA helicase DDX47                                                                                                                                                                                                                       |
| 1277 | UPI0000D61BB9    | 5                    | 13             | 13.9                  | 433    | 49390 | 9.5 | AP-2 complex subunit mu-1 (Adaptin mu-1) (AP-2 mu-2 chain) (Clathrin coat assembly protein AP50) (Clathrin coat-associated protein AP50) (Plasma membrane adaptor AP-2 50 kDa protein) (HA2 50 kDa subunit) (Clathrin assembly protein complex 2 medium chain). |
| 1277 | Q96CW1           | 5                    | 13             | 13.8                  | 435    | 49655 | 9.5 | AP-2 complex subunit mu-1                                                                                                                                                                                                                                       |
| 1277 | UPI00004571AB    | 5                    | 13             | 13.8                  | 435    | 49656 | 9.5 | AP-2 complex subunit mu-1 (Adaptin mu-1) (AP-2 mu-2 chain) (Clathrin coat assembly protein AP50) (Clathrin coat-associated protein AP50) (Plasma membrane adaptor AP-2 50 kDa protein) (HA2 50 kDa subunit) (Clathrin assembly protein complex 2 medium chain). |
| 1278 | Q9NPQ8-2         | 5                    | 8              | 13.9                  | 524    | 58846 | 6.6 | Isoform 2 of Q9NPQ8                                                                                                                                                                                                                                             |
| 1278 | Q9NPQ8           | 5                    | 8              | 13.8                  | 530    | 59612 | 5.3 | Synembryn-A                                                                                                                                                                                                                                                     |
| 1278 | UPI0000037C19    | 5                    | 8              | 13.6                  | 537    | 60372 | 5.3 | resistance to inhibitors of cholinesterase 8 homolog A                                                                                                                                                                                                          |
| 1278 | Q9NPQ8-3         | 5                    | 8              | 13.6                  | 536    | 60275 | 5.3 | Isoform 3 of Q9NPQ8                                                                                                                                                                                                                                             |
| 1279 | O15554           | 5                    | 18             | 13.6                  | 427    | 47696 | 9.8 | Intermediate conductance calcium-activated potassium channel protein 4                                                                                                                                                                                          |
| 1280 | UPI0000F0A4F3    | 5                    | 11             | 17.6                  | 336    | 37229 | 6.5 | C-terminal-binding protein 2                                                                                                                                                                                                                                    |
| 1280 | P56545           | 5                    | 11             | 13.3                  | 445    | 48945 | 6.9 | C-terminal-binding protein 2                                                                                                                                                                                                                                    |
| 1280 | Q86SV0           | 5                    | 11             | 13.3                  | 445    | 48933 | 6.9 | CTBP2 protein                                                                                                                                                                                                                                                   |
| 1280 | Q5SQP8           | 5                    | 11             | 11.5                  | 513    | 56102 | 7   | C-terminal binding protein 2                                                                                                                                                                                                                                    |

| No.  | Accession Number | Unique Peptide Count | Spectrum Count | Sequence Coverage (%) | Length | MolWt  | pI  | Descriptive Name                                                                                                                                                                                    |
|------|------------------|----------------------|----------------|-----------------------|--------|--------|-----|-----------------------------------------------------------------------------------------------------------------------------------------------------------------------------------------------------|
| 1280 | Q5SQP7           | 5                    | 11             | 6                     | 985    | 106187 | 8   | C-terminal binding protein 2                                                                                                                                                                        |
| 1281 | Q12765           | 5                    | 32             | 13.3                  | 414    | 46382  | 4.8 | Secernin-1                                                                                                                                                                                          |
| 1281 | UPI000007450E    | 5                    | 32             | 13.3                  | 414    | 46422  | 4.8 | secernin 1                                                                                                                                                                                          |
| 1282 | Q16719           | 5                    | 15             | 13.3                  | 465    | 52352  | 7   | Kynureninase                                                                                                                                                                                        |
| 1282 | Q53F63           | 5                    | 15             | 13.3                  | 465    | 52325  | 6.8 | Kynureninase (L-kynurenine hydrolase) variant                                                                                                                                                       |
| 1283 | O00116           | 5                    | 20             | 13.2                  | 658    | 72912  | 7.3 | Alkyldihydroxyacetonephosphate synthase, peroxisomal precursor                                                                                                                                      |
| 1284 | Q9H857-4         | 5                    | 8              | 17.4                  | 390    | 45998  | 8.1 | Isoform 4 of Q9H857                                                                                                                                                                                 |
| 1284 | Q9H857-3         | 5                    | 8              | 14.8                  | 461    | 54177  | 7   | Isoform 3 of Q9H857                                                                                                                                                                                 |
| 1284 | Q9H857-2         | 5                    | 8              | 14                    | 486    | 57204  | 7.1 | Isoform 2 of Q9H857                                                                                                                                                                                 |
| 1284 | Q9H857           | 5                    | 8              | 13.1                  | 520    | 60719  | 6.8 | 5'-nucleotidase domain-containing protein 2                                                                                                                                                         |
| 1285 | Q9H223           | 5                    | 5              | 12.9                  | 541    | 61175  | 6.8 | EH domain-containing protein 4                                                                                                                                                                      |
| 1286 | P30837           | 5                    | 13             | 12.8                  | 517    | 57238  | 6.8 | Aldehyde dehydrogenase X, mitochondrial precursor                                                                                                                                                   |
| 1287 | Q02318           | 5                    | 9              | 12.6                  | 531    | 60235  | 8.9 | Cytochrome P450 27, mitochondrial precursor (EC 1.14.13.15) (Cytochrome P-450C27/25) (Sterol 26-hydroxylase) (Sterol 27-hydroxylase) (Vitamin D(3) 25-hydroxylase)                                  |
| 1288 | Q15637-6         | 5                    | 24             | 12.6                  | 571    | 61889  | 9.3 | Isoform 6 of Q15637                                                                                                                                                                                 |
| 1289 | O15427           | 5                    | 30             | 12.5                  | 465    | 49469  | 8   | Monocarboxylate transporter 4                                                                                                                                                                       |
| 1289 | Q53G91           | 5                    | 30             | 12.5                  | 465    | 49483  | 8   | Solute carrier family 16, member 3 variant                                                                                                                                                          |
| 1290 | Q9Y285           | 5                    | 18             | 12.4                  | 508    | 57564  | 7.8 | Phenylalanyl-tRNA synthetase alpha chain                                                                                                                                                            |
| 1291 | UPI000013E7A3    | 5                    | 7              | 14                    | 477    | 52812  | 9.7 | DNA polymerase-transactivated protein 6 (DNAPTP6), mRNA                                                                                                                                             |
| 1291 | Q8WV53           | 5                    | 7              | 13.7                  | 488    | 54050  | 9.6 | DNAPTP6 protein                                                                                                                                                                                     |
| 1291 | Q53T22           | 5                    | 7              | 12.3                  | 545    | 60234  | 9.7 | Hypothetical protein DKFZP564A2416                                                                                                                                                                  |
| 1291 | UPI000013F0CD    | 5                    | 7              | 12.3                  | 546    | 60362  | 9.7 | DNA polymerase-transactivated protein 6 (DNAPTP6), mRNA                                                                                                                                             |
| 1291 | Q9NUQ6           | 5                    | 7              | 12                    | 558    | 61759  | 9.6 | CDNA FLJ11202 fis, clone PLACE1007746                                                                                                                                                               |
| 1291 | Q9NTW4           | 5                    | 7              | 12                    | 558    | 61728  | 9.7 | Hypothetical protein DKFZp564A2416                                                                                                                                                                  |
| 1292 | UPI000049E047    | 5                    | 35             | 13.5                  | 394    | 43130  | 9.4 | Adenosine 3'-phospho 5'-phosphosulfate transporter 1 (PAPS transporter 1) (Solute carrier family 35 member B2) (Putative MAPK-activating protein PM15) (Putative NF-kappa-B-activating protein 48). |
| 1292 | Q8TB61-2         | 5                    | 35             | 13.5                  | 392    | 42967  | 9.4 | Isoform 2 of Q8TB61                                                                                                                                                                                 |
| 1292 | Q8TB61           | 5                    | 35             | 12.3                  | 432    | 47515  | 9.2 | Adenosine 3'-phospho 5'-phosphosulfate transporter 1                                                                                                                                                |
| 1293 | Q9H4A4           | 5                    | 9              | 12.2                  | 650    | 72596  | 5.8 | Aminopeptidase B                                                                                                                                                                                    |
| 1294 | Q8NC56           | 5                    | 6              | 12.1                  | 503    | 56975  | 9   | LEM domain-containing protein 2                                                                                                                                                                     |
| 1295 | O75844           | 5                    | 37             | 12                    | 475    | 54813  | 7.5 | CAAX prenyl protease 1 homolog                                                                                                                                                                      |

| No.  | Accession Number | Unique Peptide Count | Spectrum Count | Sequence Coverage (%) | Length | MolWt | pI  | Descriptive Name                                                                                                                                                                                                                     |
|------|------------------|----------------------|----------------|-----------------------|--------|-------|-----|--------------------------------------------------------------------------------------------------------------------------------------------------------------------------------------------------------------------------------------|
| 1296 | P10619           | 5                    | 24             | 11.7                  | 480    | 54466 | 6.6 | Lysosomal protective protein precursor (EC 3.4.16.5) (Cathepsin A) (Carboxypeptidase C) (Protective protein for beta-galactosidase) [Contains: Lysosomal protective protein 32 kDa chain; Lysosomal protective protein 20 kDa chain] |
| 1296 | Q59EV6           | 5                    | 24             | 11.3                  | 497    | 56120 | 6.6 | Carrier family 6 , member 8 variant                                                                                                                                                                                                  |
| 1297 | P23368           | 5                    | 8              | 11.6                  | 584    | 65444 | 7.6 | NAD-dependent malic enzyme, mitochondrial precursor                                                                                                                                                                                  |
| 1298 | Q6PI48           | 5                    | 9              | 11.6                  | 645    | 73563 | 8   | Aspartyl-tRNA synthetase, mitochondrial precursor                                                                                                                                                                                    |
| 1299 | Q14166           | 5                    | 14             | 11.5                  | 644    | 74404 | 5.5 | Tubulin-tyrosine ligase-like protein 12                                                                                                                                                                                              |
| 1300 | Q9P258           | 5                    | 9              | 11.3                  | 522    | 56085 | 8.8 | Protein RCC2                                                                                                                                                                                                                         |
| 1301 | Q01650           | 5                    | 63             | 11.2                  | 507    | 55010 | 7.7 | Large neutral amino acids transporter small subunit 1                                                                                                                                                                                |
| 1302 | Q96A33           | 5                    | 9              | 11.2                  | 483    | 55874 | 4.9 | Coiled-coil domain-containing protein 47 precursor                                                                                                                                                                                   |
| 1302 | UPI0000073E7C    | 5                    | 9              | 11.2                  | 483    | 55816 | 4.9 | coiled-coil domain containing 47                                                                                                                                                                                                     |
| 1302 | Q96A33-2         | 5                    | 9              | 11.2                  | 480    | 55318 | 4.7 | Isoform 2 of Q96A33                                                                                                                                                                                                                  |
| 1303 | O94826           | 5                    | 12             | 10.9                  | 608    | 67455 | 7.1 | Mitochondrial precursor proteins import receptor                                                                                                                                                                                     |
| 1303 | Q6P0M2           | 5                    | 12             | 10.9                  | 607    | 67398 | 7.1 | Translocase of outer mitochondrial membrane 70 homolog A                                                                                                                                                                             |
| 1304 | P61011           | 5                    | 8              | 10.9                  | 504    | 55705 | 8.8 | Signal recognition particle 54 kDa protein                                                                                                                                                                                           |
| 1305 | Q14108           | 5                    | 60             | 10.9                  | 478    | 54290 | 5.1 | Lysosome membrane protein 2                                                                                                                                                                                                          |
| 1306 | Q6UW63           | 5                    | 11             | 10.8                  | 502    | 58043 | 7.7 | KDEL motif-containing protein 1 precursor                                                                                                                                                                                            |
| 1306 | UPI000006ED28    | 5                    | 11             | 10.8                  | 502    | 58029 | 7.7 | KDEL (Lys-Asp-Glu-Leu) containing 1                                                                                                                                                                                                  |
| 1307 | Q8IY81           | 5                    | 17             | 10.3                  | 847    | 96576 | 8.2 | Putative rRNA methyltransferase 3 (EC 2.1.1.-) (rRNA (uridine-2'-O-)-methyltransferase 3)                                                                                                                                            |
| 1307 | UPI000013C87B    | 5                    | 17             | 10.3                  | 847    | 96558 | 8.4 | Putative rRNA methyltransferase 3 (EC 2.1.1.-) (rRNA (uridine-2'-O-)-methyltransferase 3).                                                                                                                                           |
| 1308 | Q09161           | 5                    | 8              | 10                    | 790    | 91839 | 6.4 | Nuclear cap-binding protein subunit 1                                                                                                                                                                                                |
| 1309 | P19022           | 5                    | 7              | 9.9                   | 906    | 99809 | 4.8 | Cadherin-2 precursor                                                                                                                                                                                                                 |
| 1310 | P52294           | 5                    | 12             | 9.9                   | 538    | 60249 | 5   | Importin alpha-1 subunit                                                                                                                                                                                                             |
| 1310 | UPI000013D524    | 5                    | 12             | 9.9                   | 538    | 60222 | 5   | Importin alpha-1 subunit (Karyopherin alpha-1 subunit) (SRP1-beta) (RAG cohort protein 2) (Nucleoprotein interactor 1) (NPI-1).                                                                                                      |
| 1310 | Q5BKZ2           | 5                    | 12             | 9.9                   | 538    | 60309 | 5   | Karyopherin alpha 1                                                                                                                                                                                                                  |
| 1311 | Q8TCS8           | 5                    | 12             | 9.7                   | 783    | 85951 | 7.8 | Polyribonucleotide nucleotidyltransferase 1, mitochondrial precursor                                                                                                                                                                 |

| No.  | Accession Number | Unique Peptide Count | Spectrum Count | Sequence Coverage (%) | Length | MolWt  | pI  | Descriptive Name                                                                                                                                                                              |
|------|------------------|----------------------|----------------|-----------------------|--------|--------|-----|-----------------------------------------------------------------------------------------------------------------------------------------------------------------------------------------------|
| 1311 | UPI0000D611A9    | 5                    | 12             | 9.7                   | 785    | 86123  | 7.8 | Polyribonucleotide nucleotidyltransferase 1, mitochondrial precursor (EC 2.7.7.8) (PNPase 1) (Polynucleotide phosphorylase-like protein) (PNPase old-35) (3'-5' RNA exonuclease OLD35).       |
| 1311 | UPI000007136D    | 5                    | 12             | 9.7                   | 783    | 85937  | 7.8 | polyribonucleotide nucleotidyltransferase 1                                                                                                                                                   |
| 1312 | UPI000015D937    | 5                    | 5              | 9.7                   | 620    | 71320  | 6.5 | protein arginine methyltransferase 5 isoform b                                                                                                                                                |
| 1312 | O14744           | 5                    | 5              | 9.4                   | 637    | 72684  | 6.3 | Protein arginine N-methyltransferase 5                                                                                                                                                        |
| 1313 | Q9Y5L0-4         | 5                    | 15             | 9.4                   | 909    | 102541 | 5.6 | Isoform 4 of Q9Y5L0                                                                                                                                                                           |
| 1313 | A4D1K9           | 5                    | 15             | 9.2                   | 923    | 104203 | 5.6 | Transportin 3                                                                                                                                                                                 |
| 1314 | Q9BRC2           | 5                    | 7              | 9.1                   | 750    | 83856  | 6.8 | TBCD protein                                                                                                                                                                                  |
| 1314 | Q9BTW9-5         | 5                    | 7              | 9                     | 757    | 84263  | 6.4 | Isoform 5 of Q9BTW9                                                                                                                                                                           |
| 1314 | UPI000020053F    | 5                    | 7              | 5.7                   | 1192   | 132600 | 6.2 | beta-tubulin cofactor D                                                                                                                                                                       |
| 1314 | Q9BTW9           | 5                    | 7              | 5.7                   | 1192   | 132528 | 6.2 | Tubulin-specific chaperone D                                                                                                                                                                  |
| 1314 | Q9BTW9-4         | 5                    | 7              | 5.4                   | 1248   | 138597 | 6.4 | Isoform 4 of Q9BTW9                                                                                                                                                                           |
| 1315 | Q17RS0           | 5                    | 6              | 9                     | 1105   | 122867 | 5.8 | SWI/SNF related, matrix associated, actin dependent regulator of chromatin, subfamily c, member 1                                                                                             |
| 1315 | UPI0000167B18    | 5                    | 6              | 9                     | 1105   | 122721 | 5.8 | SWI/SNF-related matrix-associated actin-dependent regulator of chromatin c1                                                                                                                   |
| 1315 | Q92922           | 5                    | 6              | 9                     | 1105   | 122753 | 5.8 | SWI/SNF-related matrix-associated actin-dependent regulator of chromatin subfamily C member 1                                                                                                 |
| 1315 | Q58EY4           | 5                    | 6              | 9                     | 1105   | 122911 | 5.7 | SWI/SNF related, matrix associated, actin dependent regulator of chromatin, subfamily c, member 1                                                                                             |
| 1316 | Q7L5N7           | 5                    | 15             | 9                     | 544    | 60208  | 6.6 | Acytransferase-like 1                                                                                                                                                                         |
| 1317 | Q9BUJ2-4         | 5                    | 8              | 9.9                   | 756    | 84794  | 8.8 | Isoform 4 of Q9BUJ2                                                                                                                                                                           |
| 1317 | Q9BUJ2-2         | 5                    | 8              | 9.3                   | 804    | 90292  | 6.9 | Isoform 2 of Q9BUJ2                                                                                                                                                                           |
| 1317 | Q9BUJ2           | 5                    | 8              | 8.8                   | 856    | 95739  | 6.9 | Heterogeneous nuclear ribonucleoprotein U-like protein 1                                                                                                                                      |
| 1318 | O94901           | 5                    | 11             | 10                    | 812    | 90064  | 7.1 | Sad1/unc-84 protein-like 1                                                                                                                                                                    |
| 1318 | UPI000013E40F    | 5                    | 11             | 9.9                   | 822    | 91113  | 7.2 | Sad1/unc-84 protein-like 1 (Unc-84 homolog A).                                                                                                                                                |
| 1318 | A4D2Q0           | 5                    | 11             | 8.3                   | 974    | 108455 | 8   | Unc-84 homolog A                                                                                                                                                                              |
| 1319 | Q00653           | 5                    | 13             | 8.3                   | 900    | 96749  | 6.2 | Nuclear factor NF-kappa-B p100 subunit (DNA-binding factor KBF2) (H2TF1) (Lymphocyte translocation chromosome 10) (Oncogene Lyt-10) (Lyt10) [Contains: Nuclear factor NF-kappa-B p52 subunit] |
| 1319 | UPI000012DC55    | 5                    | 13             | 8.3                   | 899    | 96678  | 6.2 | nuclear factor of kappa light polypeptide gene enhancer in B-cells 2 isoform b                                                                                                                |



| No.  | Accession Number | Unique Peptide Count | Spectrum Count | Sequence Coverage (%) | Length | MolWt  | pI   | Descriptive Name                                                                                                                                                                               |
|------|------------------|----------------------|----------------|-----------------------|--------|--------|------|------------------------------------------------------------------------------------------------------------------------------------------------------------------------------------------------|
| 1319 | UPI00004563FB    | 5                    | 13             | 8.1                   | 930    | 100358 | 6.6  | Nuclear factor NF-kappa-B p100 subunit (DNA-binding factor KBF2) (H2TF1) (Lymphocyte translocation chromosome 10) (Oncogene Lyt-10) (Lyt10) [Contains: Nuclear factor NF-kappa-B p52 subunit]. |
| 1320 | Q15061           | 5                    | 16             | 8.3                   | 720    | 79119  | 5.9  | WD repeat protein 43                                                                                                                                                                           |
| 1321 | UPI000012B30D    | 5                    | 24             | 8.3                   | 836    | 91840  | 9.1  | mannosyl-oligosaccharide glucosidase                                                                                                                                                           |
| 1321 | Q13724           | 5                    | 24             | 8.2                   | 837    | 91918  | 8.9  | Mannosyl-oligosaccharide glucosidase                                                                                                                                                           |
| 1321 | Q58F09           | 5                    | 24             | 8.2                   | 837    | 91907  | 9    | Glucosidase I                                                                                                                                                                                  |
| 1322 | Q14566           | 5                    | 13             | 8.2                   | 821    | 92889  | 5.4  | DNA replication licensing factor MCM6                                                                                                                                                          |
| 1323 | O00469           | 5                    | 14             | 8.1                   | 737    | 84686  | 6.7  | Procollagen-lysine,2-oxoglutarate 5 dioxygenase 2 precursor                                                                                                                                    |
| 1323 | O00469-2         | 5                    | 14             | 7.9                   | 758    | 87098  | 6.7  | Isoform 2 of O00469                                                                                                                                                                            |
| 1324 | UPI000048AB3C    | 5                    | 10             | 10                    | 652    | 72532  | 8.6  | Zinc finger CCCH domain-containing protein 11A.                                                                                                                                                |
| 1324 | O75152           | 5                    | 10             | 8                     | 810    | 89131  | 8.4  | Zinc finger CCCH domain-containing protein 11A                                                                                                                                                 |
| 1324 | UPI0000D62084    | 5                    | 10             | 8                     | 812    | 89346  | 8.4  | Zinc finger CCCH domain-containing protein 11A.                                                                                                                                                |
| 1325 | P33992           | 5                    | 11             | 8                     | 734    | 82286  | 8.4  | DNA replication licensing factor MCM5                                                                                                                                                          |
| 1325 | Q53FG5           | 5                    | 11             | 8                     | 734    | 82237  | 8.3  | Minichromosome maintenance deficient protein 5 variant                                                                                                                                         |
| 1326 | O96005           | 5                    | 19             | 7.8                   | 669    | 76097  | 6.3  | Cleft lip and palate transmembrane protein 1                                                                                                                                                   |
| 1326 | O96005-2         | 5                    | 19             | 7.6                   | 686    | 77959  | 6.3  | Isoform 2 of O96005                                                                                                                                                                            |
| 1327 | Q13618-2         | 5                    | 8              | 7.8                   | 744    | 86234  | 8    | Isoform 2 of Q13618                                                                                                                                                                            |
| 1327 | Q13618           | 5                    | 8              | 7.6                   | 768    | 88930  | 8.5  | Cullin-3                                                                                                                                                                                       |
| 1328 | Q9UHB6-2         | 5                    | 8              | 9.7                   | 599    | 67120  | 5.9  | Isoform Alpha of Q9UHB6                                                                                                                                                                        |
| 1328 | Q53GG0           | 5                    | 8              | 7.6                   | 759    | 85254  | 6.8  | Epithelial protein lost in neoplasm beta variant                                                                                                                                               |
| 1328 | Q9UHB6           | 5                    | 8              | 7.6                   | 759    | 85226  | 6.8  | LIM domain and actin-binding protein 1                                                                                                                                                         |
| 1328 | Q59FE8           | 5                    | 8              | 7.5                   | 769    | 86107  | 6.8  | Epithelial protein lost in neoplasm beta variant                                                                                                                                               |
| 1329 | Q2Y124           | 5                    | 5              | 7.6                   | 824    | 92904  | 7.6  | Transient receptor potential vanilloid 4 channel variant C                                                                                                                                     |
| 1329 | Q2Y123           | 5                    | 5              | 7.5                   | 837    | 94998  | 8.2  | Transient receptor potential vanilloid 4 channel variant D                                                                                                                                     |
| 1329 | Q9HBA0-3         | 5                    | 5              | 7.4                   | 853    | 96449  | 8.4  | Isoform 3 of Q9HBA0                                                                                                                                                                            |
| 1329 | Q9HBA0           | 5                    | 5              | 7.2                   | 871    | 98281  | 7.8  | Transient receptor potential cation channel subfamily V member 4                                                                                                                               |
| 1330 | UPI000013CEE9    | 5                    | 15             | 7.5                   | 1037   | 119938 | 5.2  | importin 8                                                                                                                                                                                     |
| 1331 | UPI0000456C02    | 5                    | 12             | 7.2                   | 866    | 97663  | 7.3  | Dynamamin-2 (EC 3.6.5.5).                                                                                                                                                                      |
| 1331 | P50570-2         | 5                    | 12             | 7.2                   | 866    | 97652  | 7.6  | Isoform 2 of P50570                                                                                                                                                                            |
| 1331 | P50570           | 5                    | 12             | 7.1                   | 870    | 98064  | 7.5  | Dynamamin-2                                                                                                                                                                                    |
| 1331 | UPI0000456C01    | 5                    | 12             | 7.1                   | 870    | 98021  | 7.3  | Dynamamin-2 (EC 3.6.5.5).                                                                                                                                                                      |
| 1332 | Q52MB3           | 5                    | 12             | 7.1                   | 672    | 78029  | 10.3 | SAFB-like transcription modulator                                                                                                                                                              |
| 1332 | UPI0000039EA4    | 5                    | 12             | 4.6                   | 1034   | 117149 | 7.9  | modulator of estrogen induced transcription isoform a                                                                                                                                          |
| 1333 | Q9NXF1           | 5                    | 9              | 7.1                   | 929    | 105674 | 9.4  | Testis-expressed sequence 10 protein                                                                                                                                                           |
| 1333 | UPI0000071D99    | 5                    | 9              | 7.1                   | 929    | 105693 | 9.4  | testis expressed sequence 10                                                                                                                                                                   |

| No.  | Accession Number | Unique Peptide Count | Spectrum Count | Sequence Coverage (%) | Length | MolWt  | pI  | Descriptive Name                                                                                                                                                                                            |
|------|------------------|----------------------|----------------|-----------------------|--------|--------|-----|-------------------------------------------------------------------------------------------------------------------------------------------------------------------------------------------------------------|
| 1334 | UPI0000456EF2    | 5                    | 21             | 7.7                   | 764    | 85458  | 8.5 | Mitochondrial ATP-binding cassette sub-family B member 6 (Mitochondrial ABC transporter 3) (Mt-ABC transporter 3) (Ubiquitously expressed mammalian ABC half transporter) (P-glycoprotein-related protein). |
| 1334 | Q9NP58-4         | 5                    | 21             | 7.7                   | 766    | 85685  | 8.5 | Isoform 4 of Q9NP58                                                                                                                                                                                         |
| 1334 | Q9NP58           | 5                    | 21             | 7                     | 842    | 93886  | 8.5 | Mitochondrial ATP-binding cassette sub-family B member 6                                                                                                                                                    |
| 1335 | P25205           | 5                    | 9              | 6.9                   | 808    | 90981  | 5.8 | DNA replication licensing factor MCM3                                                                                                                                                                       |
| 1335 | Q53HJ4           | 5                    | 9              | 6.9                   | 808    | 90981  | 5.7 | Minichromosome maintenance protein 3 variant                                                                                                                                                                |
| 1336 | Q6ZXV5           | 5                    | 26             | 6.9                   | 915    | 104009 | 8.9 | Transmembrane and TPR repeat-containing protein 3                                                                                                                                                           |
| 1336 | UPI00001A9DBE    | 5                    | 26             | 6.9                   | 914    | 103835 | 8.9 | transmembrane and tetratricopeptide repeat containing 3                                                                                                                                                     |
| 1336 | Q6ZXV5-2         | 5                    | 26             | 6.9                   | 914    | 103880 | 8.8 | Isoform 2 of Q6ZXV5                                                                                                                                                                                         |
| 1337 | Q5SYX5           | 5                    | 7              | 7                     | 952    | 107946 | 5   | Golgi autoantigen, golgin subfamily a, 2                                                                                                                                                                    |
| 1337 | Q08379           | 5                    | 7              | 6.8                   | 990    | 111659 | 5   | Golgin subfamily A member 2                                                                                                                                                                                 |
| 1337 | UPI00004577B2    | 5                    | 7              | 6.8                   | 991    | 111652 | 5   | Golgin subfamily A member 2 (Cis-Golgi matrix protein GM130) (Gm130 autoantigen) (Golgin-95).                                                                                                               |
| 1338 | Q99805           | 5                    | 22             | 6.8                   | 663    | 75776  | 7.4 | Transmembrane 9 superfamily protein member 2 precursor                                                                                                                                                      |
| 1339 | Q5H9R7-3         | 5                    | 14             | 7.1                   | 791    | 88909  | 4.6 | Isoform 3 of Q5H9R7                                                                                                                                                                                         |
| 1339 | Q5H9R7-6         | 5                    | 14             | 6.6                   | 844    | 94445  | 4.6 | Isoform 6 of Q5H9R7                                                                                                                                                                                         |
| 1339 | Q5H9R7-2         | 5                    | 14             | 6.5                   | 867    | 96957  | 4.6 | Isoform 2 of Q5H9R7                                                                                                                                                                                         |
| 1339 | Q5H9R7           | 5                    | 14             | 6.4                   | 873    | 97669  | 4.6 | SAPS domain family member 3                                                                                                                                                                                 |
| 1339 | Q5H9R7-5         | 5                    | 14             | 6.4                   | 879    | 98485  | 4.6 | Isoform 5 of Q5H9R7                                                                                                                                                                                         |
| 1340 | P56192           | 5                    | 9              | 6.3                   | 900    | 101116 | 6.2 | Methionyl-tRNA synthetase, cytoplasmic                                                                                                                                                                      |
| 1341 | Q03701           | 5                    | 38             | 6.3                   | 1054   | 120988 | 5.9 | CCAAT/enhancer-binding protein zeta                                                                                                                                                                         |
| 1341 | UPI0000072AAB    | 5                    | 38             | 6.3                   | 1054   | 120974 | 5.9 | CCAAT/enhancer binding protein zeta                                                                                                                                                                         |
| 1342 | Q2M2I8           | 5                    | 11             | 6.3                   | 863    | 93578  | 8.5 | AP2-associated protein kinase 1                                                                                                                                                                             |
| 1343 | Q53SY9           | 5                    | 16             | 6.3                   | 1016   | 106667 | 5.1 | Hypothetical protein EMILIN1                                                                                                                                                                                |
| 1343 | Q9Y6C2           | 5                    | 16             | 6.3                   | 1016   | 106695 | 5.2 | EMILIN-1 precursor                                                                                                                                                                                          |
| 1344 | Q6P275           | 5                    | 7              | 6.2                   | 1221   | 140090 | 5.5 | STAG1 protein                                                                                                                                                                                               |
| 1344 | Q4LE48           | 5                    | 7              | 6                     | 1275   | 146338 | 5.7 | STAG1 variant protein                                                                                                                                                                                       |
| 1344 | UPI000020A2DE    | 5                    | 7              | 6                     | 1258   | 144427 | 5.6 | stromal antigen 1                                                                                                                                                                                           |
| 1344 | Q8WVM7           | 5                    | 7              | 6                     | 1258   | 144445 | 5.6 | Cohesin subunit SA-1                                                                                                                                                                                        |
| 1345 | Q9Y4F1           | 5                    | 8              | 6                     | 1045   | 118633 | 8.2 | FERM, RhoGEF and pleckstrin domain-containing protein 1                                                                                                                                                     |
| 1345 | UPI000041C6E3    | 5                    | 8              | 5.9                   | 1076   | 122095 | 8.5 | FERM, RhoGEF and pleckstrin domain-containing protein 1 (Chondrocyte- derived ezrin-like protein).                                                                                                          |
| 1345 | Q9Y4F1-2         | 5                    | 8              | 5.9                   | 1076   | 122113 | 8.5 | Isoform 2 of Q9Y4F1                                                                                                                                                                                         |
| 1346 | Q29RF7           | 5                    | 8              | 5.8                   | 1337   | 150830 | 7.9 | SCC-112 protein                                                                                                                                                                                             |
| 1347 | O76024           | 5                    | 14             | 5.6                   | 890    | 100305 | 8   | Wolframin                                                                                                                                                                                                   |
| 1347 | UPI00000715C3    | 5                    | 14             | 5.6                   | 890    | 100291 | 8   | Wolframin.                                                                                                                                                                                                  |
| 1348 | P12109           | 5                    | 19             | 5.6                   | 1028   | 108529 | 5.4 | Collagen alpha-1(VI) chain precursor                                                                                                                                                                        |

| No.  | Accession Number | Unique Peptide Count | Spectrum Count | Sequence Coverage (%) | Length | MolWt  | pI  | Descriptive Name                                                                                                                                                                                                               |
|------|------------------|----------------------|----------------|-----------------------|--------|--------|-----|--------------------------------------------------------------------------------------------------------------------------------------------------------------------------------------------------------------------------------|
| 1349 | Q53EP0           | 5                    | 15             | 5.6                   | 1204   | 132878 | 5.9 | Fibronectin type III domain-containing protein 3B                                                                                                                                                                              |
| 1349 | UPI00001AE8B2    | 5                    | 15             | 5.6                   | 1204   | 132888 | 5.9 | fibronectin type III domain containing 3B                                                                                                                                                                                      |
| 1349 | Q8IXB2           | 5                    | 15             | 5.6                   | 1204   | 132900 | 5.9 | FAD104                                                                                                                                                                                                                         |
| 1349 | Q5U5T8           | 5                    | 15             | 5.6                   | 1204   | 132957 | 5.9 | Fibronectin type III domain containing 3B                                                                                                                                                                                      |
| 1350 | Q15386           | 5                    | 11             | 5.5                   | 1083   | 123923 | 6.7 | Ubiquitin-protein ligase E3C                                                                                                                                                                                                   |
| 1350 | UPI000013D26C    | 5                    | 11             | 5.5                   | 1085   | 124150 | 6.7 | Ubiquitin-protein ligase E3C (EC 6.3.2.-).                                                                                                                                                                                     |
| 1350 | UPI0000071402    | 5                    | 11             | 5.5                   | 1083   | 123937 | 6.7 | ubiquitin protein ligase E3C                                                                                                                                                                                                   |
| 1351 | O00291           | 5                    | 6              | 5.2                   | 1030   | 115442 | 5.3 | Huntingtin-interacting protein 1                                                                                                                                                                                               |
| 1351 | UPI0000D61C73    | 5                    | 6              | 5.2                   | 1039   | 116414 | 5.3 | Huntingtin-interacting protein 1 (HIP-I).                                                                                                                                                                                      |
| 1351 | Q2TB58           | 5                    | 6              | 5.2                   | 1037   | 116221 | 5.3 | Huntingtin interacting protein 1                                                                                                                                                                                               |
| 1352 | UPI000020D228    | 5                    | 8              | 5.3                   | 1253   | 145015 | 8.6 | Myosin-6 (Myosin VI) (Unconventional myosin VI).                                                                                                                                                                               |
| 1352 | Q9UM54-5         | 5                    | 8              | 5.3                   | 1253   | 145041 | 8.6 | Isoform 5 of Q9UM54                                                                                                                                                                                                            |
| 1352 | Q9UM54-2         | 5                    | 8              | 5.3                   | 1262   | 146047 | 8.5 | Isoform 2 of Q9UM54                                                                                                                                                                                                            |
| 1352 | Q9UM54           | 5                    | 8              | 5.2                   | 1294   | 149691 | 8.5 | Myosin-VI                                                                                                                                                                                                                      |
| 1352 | Q9UM54-4         | 5                    | 8              | 5.2                   | 1285   | 148684 | 8.6 | Isoform 4 of Q9UM54                                                                                                                                                                                                            |
| 1352 | Q9UM54-1         | 5                    | 8              | 5.2                   | 1285   | 148713 | 8.5 | Isoform 1 of Q9UM54                                                                                                                                                                                                            |
| 1353 | UPI0000D61296    | 5                    | 15             | 5.4                   | 1252   | 135490 | 8.8 | Ras-associated and pleckstrin homology domains-containing protein 1 (RAPH1) (Lamellipodin) (Proline-rich EVH1 ligand 2) (PREL-2) (Protein RMO1) (Amyotrophic lateral sclerosis 2 chromosomal region candidate 9 gene protein). |
| 1353 | UPI000020940F    | 5                    | 15             | 5.4                   | 1250   | 135256 | 8.9 | Ras association and pleckstrin homology domains 1 isoform 1                                                                                                                                                                    |
| 1353 | Q70E73-10        | 5                    | 15             | 5.4                   | 1250   | 135242 | 8.9 | Isoform RMO1                                                                                                                                                                                                                   |
| 1353 | Q70E73           | 5                    | 15             | 5.1                   | 1302   | 141165 | 8.9 | Ras-associated and pleckstrin homology domains-containing protein 1                                                                                                                                                            |
| 1353 | UPI0000D61297    | 5                    | 15             | 5.1                   | 1304   | 141414 | 8.9 | Ras-associated and pleckstrin homology domains-containing protein 1 (RAPH1) (Lamellipodin) (Proline-rich EVH1 ligand 2) (PREL-2) (Protein RMO1) (Amyotrophic lateral sclerosis 2 chromosomal region candidate 9 gene protein). |
| 1354 | Q9NVI1           | 5                    | 11             | 5.1                   | 1268   | 142581 | 6.8 | Uncharacterized membrane protein KIAA1794                                                                                                                                                                                      |
| 1354 | UPI0000603C25    | 5                    | 11             | 5.1                   | 1268   | 142569 | 6.8 | hypothetical protein LOC55215                                                                                                                                                                                                  |
| 1354 | Q9NVI1-2         | 5                    | 11             | 5.1                   | 1267   | 142452 | 6.8 | Isoform 2 of Q9NVI1                                                                                                                                                                                                            |
| 1354 | Q9NVI1-3         | 5                    | 11             | 4.9                   | 1328   | 149335 | 6.7 | Isoform 3 of Q9NVI1                                                                                                                                                                                                            |
| 1355 | O75976           | 5                    | 10             | 4.2                   | 1380   | 152931 | 6   | Carboxypeptidase D precursor                                                                                                                                                                                                   |
| 1356 | O15118           | 5                    | 32             | 4.1                   | 1278   | 142166 | 5.4 | Niemann-Pick C1 protein precursor                                                                                                                                                                                              |
| 1356 | UPI00001303D7    | 5                    | 32             | 4.1                   | 1278   | 142148 | 5.4 | Niemann-Pick disease, type C1 precursor                                                                                                                                                                                        |
| 1356 | Q59GR1           | 5                    | 32             | 4.1                   | 1289   | 143231 | 5.4 | Niemann-Pick disease, type C1 variant                                                                                                                                                                                          |
| 1357 | Q92896           | 5                    | 7              | 4.1                   | 1179   | 134593 | 6.9 | Golgi apparatus protein 1 precursor                                                                                                                                                                                            |
| 1357 | Q6P9D1           | 5                    | 7              | 4                     | 1203   | 137222 | 6.9 | Golgi apparatus protein 1                                                                                                                                                                                                      |
| 1358 | Q6PGP7           | 5                    | 6              | 3.5                   | 1564   | 175485 | 7.5 | Tetratricopeptide repeat protein 37                                                                                                                                                                                            |

| No.  | Accession Number | Unique Peptide Count | Spectrum Count | Sequence Coverage (%) | Length | MolWt  | pI  | Descriptive Name                                                                                                                                                                             |
|------|------------------|----------------------|----------------|-----------------------|--------|--------|-----|----------------------------------------------------------------------------------------------------------------------------------------------------------------------------------------------|
| 1359 | Q9H3S7           | 5                    | 7              | 3.5                   | 1636   | 178972 | 6.9 | Tyrosine-protein phosphatase non-receptor type 23                                                                                                                                            |
| 1360 | UPI000049DE09    | 5                    | 9              | 3.5                   | 1615   | 182150 | 9.7 | Retinoblastoma-binding protein 6 (p53-associated cellular protein of testis) (Proliferation potential-related protein) (Protein P2P-R) (Retinoblastoma-binding Q protein 1) (Protein RBQ-1). |
| 1360 | Q7Z6E9-2         | 5                    | 9              | 3.2                   | 1758   | 197286 | 9.6 | Isoform 2 of Q7Z6E9                                                                                                                                                                          |
| 1360 | Q7Z6E9           | 5                    | 9              | 3.1                   | 1792   | 201563 | 9.6 | Retinoblastoma-binding protein 6                                                                                                                                                             |
| 1361 | Q12789           | 5                    | 8              | 2.6                   | 2109   | 238270 | 7.3 | General transcription factor 3C polypeptide 1                                                                                                                                                |
| 1361 | UPI0000D619C5    | 5                    | 8              | 2.6                   | 2110   | 238556 | 7.4 | General transcription factor 3C polypeptide 1 (Transcription factor IIIC-subunit alpha) (TF3C-alpha) (TFIIIC 220 kDa subunit) (TFIIIC220) (TFIIIC box B-binding subunit).                    |
| 1361 | UPI0000D619C4    | 5                    | 8              | 2.6                   | 2112   | 239270 | 7.4 | General transcription factor 3C polypeptide 1 (Transcription factor IIIC-subunit alpha) (TF3C-alpha) (TFIIIC 220 kDa subunit) (TFIIIC220) (TFIIIC box B-binding subunit).                    |
| 1361 | UPI00001FF123    | 5                    | 8              | 2.6                   | 2109   | 238873 | 7.3 | general transcription factor IIIC, polypeptide 1, alpha 220kDa                                                                                                                               |
| 1361 | Q6AWA4           | 5                    | 8              | 2.6                   | 2112   | 238179 | 7.5 | Hypothetical protein DKFZp686O0870                                                                                                                                                           |
| 1361 | Q6AHZ7           | 5                    | 8              | 2.6                   | 2109   | 238799 | 7.4 | Hypothetical protein DKFZp686A111                                                                                                                                                            |
| 1361 | Q12789-2         | 5                    | 8              | 2.6                   | 2109   | 238885 | 7.3 | Isoform 2 of Q12789                                                                                                                                                                          |
| 1362 | UPI0000D60F33    | 5                    | 6              | 2.9                   | 1788   | 200772 | 7.1 | Supervillin (Archvillin) (p205/p250).                                                                                                                                                        |
| 1362 | UPI0000366679    | 5                    | 6              | 2.9                   | 1788   | 200846 | 6.9 | Supervillin (Archvillin) (p205/p250).                                                                                                                                                        |
| 1362 | UPI000006D31C    | 5                    | 6              | 2.9                   | 1788   | 200820 | 6.9 | supervillin isoform 1                                                                                                                                                                        |
| 1362 | O95425-2         | 5                    | 6              | 2.9                   | 1788   | 200792 | 6.9 | Isoform 2 of O95425                                                                                                                                                                          |
| 1362 | O95425           | 5                    | 6              | 2.3                   | 2214   | 247704 | 7   | Supervillin                                                                                                                                                                                  |
| 1362 | UPI0000D60F34    | 5                    | 6              | 2.3                   | 2214   | 247670 | 7.1 | Supervillin (Archvillin) (p205/p250).                                                                                                                                                        |
| 1362 | UPI0000366678    | 5                    | 6              | 2.3                   | 2214   | 247744 | 7   | Supervillin (Archvillin) (p205/p250).                                                                                                                                                        |
| 1363 | Q59FH1           | 5                    | 15             | 1.7                   | 3587   | 405818 | 8.2 | Transformation/transcription domain-associated protein variant                                                                                                                               |
| 1363 | A4D265           | 5                    | 15             | 1.6                   | 3830   | 434416 | 8.2 | Transformation/transcription domain-associated protein                                                                                                                                       |
| 1363 | Q9Y4A5           | 5                    | 15             | 1.6                   | 3859   | 437603 | 8.2 | Transformation/transcription domain-associated protein                                                                                                                                       |
| 1364 | P98160           | 5                    | 7              | 1.4                   | 4391   | 468830 | 6.5 | Basement membrane-specific heparan sulfate proteoglycan core protein precursor                                                                                                               |
| 1364 | UPI0000D626C6    | 5                    | 7              | 1.4                   | 4346   | 464081 | 6.5 | Basement membrane-specific heparan sulfate proteoglycan core protein precursor (HSPG) (Perlecan) (PLC).                                                                                      |
| 1364 | Q5VU27           | 5                    | 7              | 1.4                   | 4391   | 468835 | 6.5 | Heparan sulfate proteoglycan 2                                                                                                                                                               |
| 1365 | P68371           | 4                    | 50             | 68.3                  | 445    | 49831  | 4.9 | Tubulin beta-2C chain                                                                                                                                                                        |
| 1365 | Q8IZ29           | 4                    | 50             | 68.3                  | 445    | 49840  | 4.9 | Tubulin, beta 2C                                                                                                                                                                             |
| 1365 | Q8IWP6           | 4                    | 50             | 68.3                  | 445    | 49753  | 4.9 | Class IVb beta tubulin                                                                                                                                                                       |
| 1366 | P15531           | 4                    | 94             | 65.1                  | 152    | 17149  | 6.2 | Nucleoside diphosphate kinase A                                                                                                                                                              |

| No.  | Accession Number | Unique Peptide Count | Spectrum Count | Sequence Coverage (%) | Length | MolWt | pI  | Descriptive Name                                                             |
|------|------------------|----------------------|----------------|-----------------------|--------|-------|-----|------------------------------------------------------------------------------|
| 1367 | Q9H0U4           | 4                    | 51             | 62.7                  | 201    | 22171 | 5.7 | Ras-related protein Rab-1B                                                   |
| 1368 | P56385           | 4                    | 28             | 62.3                  | 69     | 7933  | 9.4 | ATP synthase e chain, mitochondrial                                          |
| 1369 | Q9Y333           | 4                    | 36             | 60                    | 95     | 10835 | 6.5 | U6 snRNA-associated Sm-like protein LSm2                                     |
| 1370 | Q96FJ2           | 4                    | 19             | 57.3                  | 89     | 10350 | 7.4 | Dynein light chain 2, cytoplasmic                                            |
| 1371 | Q9UBI6           | 4                    | 98             | 56.9                  | 72     | 8006  | 9   | Guanine nucleotide-binding protein G(I)/G(S)/G(O) gamma-12 subunit precursor |
| 1372 | P04080           | 4                    | 37             | 55.1                  | 98     | 11140 | 7.6 | Cystatin-B                                                                   |
| 1373 | Q8WUW1           | 4                    | 18             | 54.7                  | 75     | 8745  | 5.5 | Probable protein BRICK1                                                      |
| 1373 | Q8WUW1-2         | 4                    | 18             | 38.7                  | 106    | 12046 | 6.8 | Isoform 2 of Q8WUW1                                                          |
| 1373 | UPI00004570B9    | 4                    | 18             | 38                    | 108    | 12158 | 6.8 | UPI00004570B9 UniRef100 entry                                                |
| 1374 | P82909           | 4                    | 8              | 53.4                  | 103    | 11466 | 10  | Mitochondrial 28S ribosomal protein S36                                      |
| 1375 | Q9Y5L4           | 4                    | 19             | 52.6                  | 95     | 10500 | 8.2 | Mitochondrial import inner membrane translocase subunit Tim13                |
| 1376 | Q15369           | 4                    | 26             | 50.9                  | 112    | 12473 | 4.8 | Transcription elongation factor B polypeptide 1                              |
| 1377 | Q9Y3D0           | 4                    | 9              | 50.3                  | 163    | 17663 | 5.2 | Protein FAM96B                                                               |
| 1378 | Q92930           | 4                    | 9              | 48.3                  | 207    | 23584 | 9.1 | Ras-related protein Rab-8B                                                   |
| 1379 | O00483           | 4                    | 48             | 46.9                  | 81     | 9370  | 9.4 | NADH dehydrogenase [ubiquinone] 1 alpha subcomplex subunit 4                 |
| 1380 | Q86Y39           | 4                    | 20             | 46.8                  | 141    | 14852 | 8.7 | NADH dehydrogenase [ubiquinone] 1 alpha subcomplex subunit 11                |
| 1381 | Q15843           | 4                    | 16             | 45.7                  | 81     | 9072  | 8.4 | NEDD8 precursor                                                              |
| 1381 | UPI0000EFE33A    | 4                    | 16             | 45.7                  | 81     | 8905  | 7.2 | NEDD8                                                                        |
| 1382 | P14854           | 4                    | 48             | 45.3                  | 86     | 10192 | 7   | Cytochrome c oxidase subunit VIb isoform 1                                   |
| 1383 | Q96FQ6           | 4                    | 65             | 44.7                  | 103    | 11801 | 6.8 | Protein S100-A16                                                             |
| 1384 | Q9Y2Q5           | 4                    | 12             | 44                    | 125    | 13507 | 5.4 | Mitogen-activated protein-binding protein-interacting protein                |
| 1385 | P62312           | 4                    | 46             | 43.8                  | 80     | 9128  | 9.6 | U6 snRNA-associated Sm-like protein LSm6                                     |
| 1386 | UPI0000158C34    | 4                    | 12             | 67                    | 100    | 10905 | 4.5 | PREDICTED: similar to basic transcription factor 3-like 4                    |
| 1386 | UPI0000D61F1B    | 4                    | 12             | 44.1                  | 152    | 16409 | 5.6 | Transcription factor BTF3 homolog 4 (Basic transcription factor 3-like 4).   |
| 1386 | Q6PJ77           | 4                    | 12             | 43.8                  | 153    | 16470 | 5.6 | BTF3L4 protein                                                               |
| 1386 | Q96K17           | 4                    | 12             | 42.4                  | 158    | 17271 | 6.4 | Transcription factor BTF3 homolog 4                                          |
| 1387 | Q96EL3           | 4                    | 14             | 42.9                  | 112    | 12107 | 8.8 | 39S ribosomal protein L53, mitochondrial precursor                           |
| 1388 | Q9UI30           | 4                    | 26             | 42.4                  | 125    | 14199 | 5.3 | TRM112-like protein                                                          |
| 1389 | O43678           | 4                    | 24             | 41.4                  | 99     | 10922 | 9.6 | NADH dehydrogenase [ubiquinone] 1 alpha subcomplex subunit 2                 |
| 1390 | Q4W5L2           | 4                    | 16             | 56.9                  | 102    | 10190 | 9.5 | Hypothetical protein SNCA                                                    |
| 1390 | P37840-2         | 4                    | 16             | 51.8                  | 112    | 11372 | 8.3 | Isoform 2                                                                    |
| 1390 | P37840           | 4                    | 16             | 41.4                  | 140    | 14460 | 4.7 | Alpha-synuclein                                                              |
| 1391 | Q16864           | 4                    | 12             | 41.2                  | 119    | 13370 | 5.5 | Vacuolar ATP synthase subunit F                                              |
| 1392 | Q9BPX5           | 4                    | 12             | 41.2                  | 153    | 16941 | 6.6 | Actin-related protein 2/3 complex subunit 5-like protein                     |
| 1393 | Q8WVC2           | 4                    | 61             | 42                    | 81     | 8850  | 8.5 | RPS21 protein                                                                |
| 1393 | P63220           | 4                    | 61             | 41                    | 83     | 9111  | 8.5 | 40S ribosomal protein S21                                                    |
| 1394 | P52758           | 4                    | 12             | 40.9                  | 137    | 14494 | 8.7 | Ribonuclease UK114                                                           |

| No.  | Accession Number    | Unique Peptide Count | Spectrum Count | Sequence Coverage (%) | Length | MolWt | pI   | Descriptive Name                                                                                                     |
|------|---------------------|----------------------|----------------|-----------------------|--------|-------|------|----------------------------------------------------------------------------------------------------------------------|
| 1395 | Q9NR31              | 4                    | 33             | 40.9                  | 198    | 22367 | 6.7  | GTP-binding protein SAR1a                                                                                            |
| 1396 | P49458              | 4                    | 35             | 40.7                  | 86     | 10112 | 8    | Signal recognition particle 9 kDa protein                                                                            |
| 1397 | P42677              | 4                    | 52             | 39.3                  | 84     | 9461  | 9.5  | 40S ribosomal protein S27                                                                                            |
| 1398 | P68036              | 4                    | 32             | 39                    | 154    | 17862 | 8.5  | Ubiquitin-conjugating enzyme E2 L3                                                                                   |
| 1399 | Q9BRA2              | 4                    | 20             | 38.2                  | 123    | 13941 | 5.5  | Thioredoxin-like protein 5                                                                                           |
| 1400 | P61513              | 4                    | 79             | 38                    | 92     | 10275 | 10.4 | 60S ribosomal protein L37a                                                                                           |
| 1401 | Q6GMV3              | 4                    | 11             | 37.9                  | 140    | 15805 | 9.1  | Similar to CG14903-PA                                                                                                |
| 1402 | O95182              | 4                    | 14             | 37.2                  | 113    | 12551 | 10.2 | NADH dehydrogenase [ubiquinone] 1 alpha subcomplex subunit 7                                                         |
| 1402 | Q6IB89              | 4                    | 14             | 35.6                  | 118    | 13279 | 10.5 | NDUFA7 protein                                                                                                       |
| 1402 | Q6FG42              | 4                    | 14             | 35.6                  | 118    | 13180 | 10.5 | NDUFA7 protein                                                                                                       |
| 1403 | P00441              | 4                    | 38             | 37                    | 154    | 15936 | 6.1  | Superoxide dismutase [Cu-Zn]                                                                                         |
| 1403 | UPI00001AE968       | 4                    | 38             | 36.5                  | 156    | 16122 | 6.3  | Superoxide dismutase [Cu-Zn] (EC 1.15.1.1).                                                                          |
| 1404 | P20339              | 4                    | 6              | 36.7                  | 215    | 23659 | 8.1  | Ras-related protein Rab-5A                                                                                           |
| 1405 | P62854              | 4                    | 45             | 36.5                  | 115    | 13015 | 11   | 40S ribosomal protein S26                                                                                            |
| 1405 | Q5JVH5              | 4                    | 45             | 36.5                  | 115    | 13001 | 11   | OTTHUMP00000018641                                                                                                   |
| 1406 | Q8NB37              | 4                    | 5              | 35.9                  | 220    | 23298 | 6.6  | CDNA FLJ34283 fis, clone FEBRA2003926, weakly similar to NonF                                                        |
| 1407 | P30046              | 4                    | 41             | 35.6                  | 118    | 12712 | 7.3  | D-dopachrome decarboxylase                                                                                           |
| 1408 | P52907              | 4                    | 20             | 35.3                  | 286    | 32923 | 5.7  | F-actin capping protein subunit alpha-1                                                                              |
| 1409 | P55769              | 4                    | 41             | 35.2                  | 128    | 14174 | 8.5  | NHP2-like protein 1                                                                                                  |
| 1409 | UPI0000F53459       | 4                    | 41             | 34.6                  | 130    | 14318 | 8.5  | U4/U6.U5 tri-snRNP 15.5 kDa protein                                                                                  |
| 1410 | Q9P0M9              | 4                    | 15             | 35.1                  | 148    | 16073 | 10.4 | Mitochondrial 39S ribosomal protein L27                                                                              |
| 1411 | gi 21689593 gb AA 4 | 4                    | 9              | 34.8                  | 138    | 14722 | 5.2  | rubber elongation factor [Hevea brasiliensis]                                                                        |
| 1412 | O75828              | 4                    | 7              | 33.9                  | 277    | 30850 | 6.2  | Carbonyl reductase [NADPH] 3                                                                                         |
| 1413 | Q9GZM3              | 4                    | 6              | 33.9                  | 115    | 13074 | 6.3  | RPB11b1alpha protein                                                                                                 |
| 1413 | P52435              | 4                    | 6              | 33.3                  | 117    | 13293 | 5.9  | DNA-directed RNA polymerase II subunit J                                                                             |
| 1413 | Q9H1A6              | 4                    | 6              | 30.7                  | 127    | 14131 | 5.9  | RPB11a protein                                                                                                       |
| 1413 | Q0VGM6              | 4                    | 6              | 28.3                  | 138    | 15027 | 6.9  | MGC13098 protein                                                                                                     |
| 1413 | Q8IZ67              | 4                    | 6              | 24.4                  | 160    | 17172 | 6.9  | MGC13098 protein                                                                                                     |
| 1413 | UPI0000D61CA1       | 4                    | 6              | 21.9                  | 178    | 18673 | 6.2  | DNA-directed RNA polymerase II subunit J (EC 2.7.7.6) (DNA-directed RNA polymerase II 13.3 kDa polypeptide) (RPB11). |
| 1413 | Q6PJD2              | 4                    | 6              | 21.8                  | 179    | 18885 | 6.4  | MGC13098 protein                                                                                                     |
| 1413 | Q59FR2              | 4                    | 6              | 21.7                  | 180    | 19038 | 6.7  | MGC13098 protein variant                                                                                             |
| 1414 | Q14011              | 4                    | 18             | 33.1                  | 172    | 18648 | 9.5  | Cold-inducible RNA-binding protein                                                                                   |
| 1415 | P62899              | 4                    | 31             | 32.8                  | 125    | 14463 | 10.5 | 60S ribosomal protein L31                                                                                            |
| 1416 | Q8N5K1              | 4                    | 13             | 36.3                  | 135    | 15278 | 9.6  | Zinc finger, CDGSH-type domain 2                                                                                     |
| 1416 | Q7Z3D5              | 4                    | 13             | 32.7                  | 150    | 16793 | 9.4  | Zinc finger CDGSH domain-containing protein 2                                                                        |
| 1417 | Q9Y3E5              | 4                    | 14             | 31.8                  | 179    | 19194 | 8.7  | Peptidyl-tRNA hydrolase 2, mitochondrial precursor                                                                   |
| 1418 | P61923              | 4                    | 32             | 31.6                  | 177    | 20198 | 4.8  | Coatomer subunit zeta-1                                                                                              |
| 1418 | Q53FU3              | 4                    | 32             | 31.6                  | 177    | 20267 | 4.9  | Coatomer protein complex, subunit zeta 1 variant                                                                     |
| 1419 | O14602              | 4                    | 25             | 31.2                  | 144    | 16442 | 5.2  | Eukaryotic translation initiation factor 1A, Y-chromosomal                                                           |
| 1420 | Q96DA6              | 4                    | 11             | 31                    | 116    | 12499 | 10.1 | Mitochondrial import inner membrane translocase subunit TIM14                                                        |

| No.  | Accession Number | Unique Peptide Count | Spectrum Count | Sequence Coverage (%) | Length | MolWt | pI   | Descriptive Name                                                                                   |
|------|------------------|----------------------|----------------|-----------------------|--------|-------|------|----------------------------------------------------------------------------------------------------|
| 1421 | P51452           | 4                    | 12             | 30.8                  | 185    | 20478 | 7.8  | Dual specificity protein phosphatase 3                                                             |
| 1422 | Q13232           | 4                    | 7              | 30.8                  | 169    | 19015 | 7.8  | Nucleoside diphosphate kinase 3                                                                    |
| 1423 | P36405           | 4                    | 20             | 30.2                  | 182    | 20456 | 7.2  | ADP-ribosylation factor-like protein 3                                                             |
| 1423 | Q53X83           | 4                    | 20             | 30.2                  | 182    | 20474 | 7.2  | ARL3 protein                                                                                       |
| 1424 | P67812           | 4                    | 59             | 30.2                  | 179    | 20625 | 9.5  | Signal peptidase complex catalytic subunit SEC11A                                                  |
| 1424 | Q6IAM7           | 4                    | 59             | 30.2                  | 179    | 20611 | 9.5  | SPC18 protein                                                                                      |
| 1425 | Q16718           | 4                    | 42             | 30.2                  | 116    | 13459 | 6    | NADH dehydrogenase [ubiquinone] 1 alpha subcomplex subunit 5                                       |
| 1425 | Q5H9R2           | 4                    | 42             | 30.2                  | 116    | 13563 | 5.6  | Hypothetical protein DKFZp781K1356                                                                 |
| 1426 | Q8IV95           | 4                    | 14             | 34                    | 156    | 17984 | 5.1  | Nudix (Nucleoside diphosphate linked moiety X)-type motif 1                                        |
| 1426 | Q7Z7N6           | 4                    | 14             | 34                    | 156    | 17951 | 5.1  | Nudix (Nucleoside diphosphate linked moiety X)-type motif 1                                        |
| 1426 | A4D205           | 4                    | 14             | 29.6                  | 179    | 20296 | 5    | Nudix (Nucleoside diphosphate linked moiety X)-type motif 1                                        |
| 1426 | P36639           | 4                    | 14             | 26.9                  | 197    | 22552 | 5.3  | 7,8-dihydro-8-oxoguanine triphosphatase                                                            |
| 1427 | Q5W0X3           | 4                    | 16             | 31.1                  | 103    | 11424 | 9.1  | Peptidyl-prolyl cis-trans isomerase                                                                |
| 1427 | P62942           | 4                    | 16             | 29.6                  | 108    | 11951 | 8.2  | FK506-binding protein 1A                                                                           |
| 1428 | Q5T0P8           | 4                    | 69             | 30                    | 130    | 15069 | 10.9 | Ribosomal protein S24                                                                              |
| 1428 | Q7Z3D1           | 4                    | 69             | 29.5                  | 132    | 15326 | 10.8 | Hypothetical protein DKFZp686N1586                                                                 |
| 1428 | P62847           | 4                    | 69             | 29.3                  | 133    | 15423 | 10.8 | 40S ribosomal protein S24                                                                          |
| 1429 | P46776           | 4                    | 31             | 29.1                  | 148    | 16561 | 11   | 60S ribosomal protein L27a                                                                         |
| 1429 | UPI0000160A16    | 4                    | 31             | 29.1                  | 148    | 16622 | 11.1 | PREDICTED: similar to 60S ribosomal protein L27a                                                   |
| 1429 | Q6NZ52           | 4                    | 31             | 29.1                  | 148    | 16478 | 11   | Ribosomal protein L27a                                                                             |
| 1430 | Q9UDC2           | 4                    | 68             | 31.1                  | 135    | 15812 | 10.4 | RIG homolog                                                                                        |
| 1430 | P62841           | 4                    | 68             | 29                    | 145    | 17040 | 10.4 | 40S ribosomal protein S15                                                                          |
| 1431 | P26447           | 4                    | 41             | 28.7                  | 101    | 11728 | 6.1  | Protein S100-A4                                                                                    |
| 1432 | P32321           | 4                    | 18             | 28.7                  | 178    | 20016 | 7.6  | Deoxycytidylate deaminase                                                                          |
| 1432 | Q5M7Z8           | 4                    | 18             | 27                    | 189    | 21014 | 7.5  | DCMP deaminase                                                                                     |
| 1433 | Q8TB65           | 4                    | 30             | 28.7                  | 150    | 16762 | 6.8  | Cytochrome c oxidase subunit Va                                                                    |
| 1434 | P09104           | 4                    | 8              | 28.1                  | 434    | 47269 | 5    | Gamma-enolase                                                                                      |
| 1435 | P56556           | 4                    | 13             | 28.1                  | 128    | 15137 | 10   | NADH dehydrogenase [ubiquinone] 1 alpha subcomplex subunit 6                                       |
| 1435 | Q6IBT8           | 4                    | 13             | 28.1                  | 128    | 15185 | 10   | NDUFA6 protein                                                                                     |
| 1436 | Q9P299           | 4                    | 13             | 28.1                  | 210    | 23548 | 5.2  | Coatomeer subunit zeta-2                                                                           |
| 1437 | Q5J8M3-2         | 4                    | 12             | 34.2                  | 149    | 16745 | 10.1 | Isoform 2 of Q5J8M3                                                                                |
| 1437 | Q5J8M3           | 4                    | 12             | 27.9                  | 183    | 20087 | 8.6  | Transmembrane protein 85                                                                           |
| 1438 | P20338           | 4                    | 11             | 27.7                  | 213    | 23871 | 6.1  | Ras-related protein Rab-4A                                                                         |
| 1438 | Q5T7P7           | 4                    | 11             | 27.1                  | 218    | 24390 | 6.1  | RAB4A, member RAS oncogene family                                                                  |
| 1438 | Q53GC2           | 4                    | 11             | 27.1                  | 218    | 24332 | 6.6  | RAB4A, member RAS oncogene family variant                                                          |
| 1438 | UPI0000D620CE    | 4                    | 11             | 26.9                  | 219    | 24446 | 7.2  | Protein SPHAR (S-phase response protein).                                                          |
| 1438 | UPI0000D620CD    | 4                    | 11             | 26.9                  | 219    | 24432 | 6.6  | Protein SPHAR (S-phase response protein).                                                          |
| 1439 | O43583           | 4                    | 11             | 27.3                  | 198    | 22092 | 5.3  | Density-regulated protein                                                                          |
| 1439 | UPI00004566A8    | 4                    | 11             | 27.1                  | 199    | 22285 | 5.6  | Density-regulated protein (DRP) (Protein DRP1) (Smooth muscle cell-associated protein 3) (SMAP-3). |

| No.  | Accession Number | Unique Peptide Count | Spectrum Count | Sequence Coverage (%) | Length | MolWt | pI   | Descriptive Name                                                                                                                                                                                                   |
|------|------------------|----------------------|----------------|-----------------------|--------|-------|------|--------------------------------------------------------------------------------------------------------------------------------------------------------------------------------------------------------------------|
| 1440 | P30043           | 4                    | 22             | 27.2                  | 206    | 22119 | 7.6  | Flavin reductase                                                                                                                                                                                                   |
| 1440 | UPI000013D3F5    | 4                    | 22             | 26.5                  | 211    | 22594 | 7.6  | Flavin reductase (EC 1.5.1.30) (FR) (NADPH-dependent diaphorase) (NADPH-flavin reductase) (FLR) (Biliverdin reductase B) (EC 1.3.1.24) (BVR-B) (Biliverdin-IX beta-reductase) (Green heme-binding protein) (GHBP). |
| 1441 | O95298           | 4                    | 7              | 26.9                  | 119    | 14187 | 9    | NADH dehydrogenase [ubiquinone] 1 subunit C2                                                                                                                                                                       |
| 1441 | Q6FIH8           | 4                    | 7              | 26.9                  | 119    | 14173 | 9    | NDUFC2 protein                                                                                                                                                                                                     |
| 1442 | Q9NRW3           | 4                    | 5              | 26.8                  | 190    | 22826 | 7.6  | Probable DNA dC- dU-editing enzyme APOBEC-3C                                                                                                                                                                       |
| 1443 | Q2PFU1           | 4                    | 7              | 26.4                  | 129    | 14665 | 4.9  | Huntingtin-interacting protein HYPK                                                                                                                                                                                |
| 1443 | Q9NX55           | 4                    | 7              | 19.4                  | 175    | 19332 | 5.4  | Huntingtin-interacting protein HYPK                                                                                                                                                                                |
| 1444 | UPI0000E9BBA8    | 4                    | 70             | 28.7                  | 150    | 16821 | 6.4  | Fusion protein consists of immunoglobulin G-Bin                                                                                                                                                                    |
| 1444 | UPI0000E9BBA7    | 4                    | 70             | 28.7                  | 150    | 16835 | 6.4  | Fusion protein consists of immunoglobulin G-Bin                                                                                                                                                                    |
| 1444 | P84103           | 4                    | 70             | 26.2                  | 164    | 19330 | 11.6 | Splicing factor, arginine/serine-rich 3                                                                                                                                                                            |
| 1445 | Q96IU4           | 4                    | 9              | 26.2                  | 210    | 22346 | 6.4  | Abhydrolase domain-containing protein 14B                                                                                                                                                                          |
| 1446 | Q9BQ61           | 4                    | 7              | 26.1                  | 176    | 18419 | 9.4  | Uncharacterized protein C19orf43                                                                                                                                                                                   |
| 1447 | Q86U28           | 4                    | 5              | 26                    | 154    | 16476 | 5.2  | Iron-sulfur cluster assembly 2 homolog, mitochondrial precursor                                                                                                                                                    |
| 1448 | P41223           | 4                    | 19             | 25.7                  | 144    | 17000 | 8.8  | Protein BUD31 homolog                                                                                                                                                                                              |
| 1449 | P62256           | 4                    | 10             | 25.7                  | 183    | 20655 | 4.7  | Ubiquitin-conjugating enzyme E2 H                                                                                                                                                                                  |
| 1450 | O96000           | 4                    | 19             | 25.6                  | 172    | 20777 | 8.5  | NADH dehydrogenase [ubiquinone] 1 beta subcomplex subunit 10                                                                                                                                                       |
| 1451 | Q9NV31           | 4                    | 13             | 25.5                  | 184    | 21850 | 9.5  | U3 small nucleolar ribonucleoprotein protein IMP3                                                                                                                                                                  |
| 1452 | Q8IZQ5           | 4                    | 21             | 25.4                  | 122    | 13407 | 9.6  | Selenoprotein H                                                                                                                                                                                                    |
| 1452 | UPI0000163E14    | 4                    | 21             | 25.4                  | 122    | 13303 | 9.7  | selenoprotein H                                                                                                                                                                                                    |
| 1453 | Q5SPS5           | 4                    | 7              | 26.3                  | 615    | 67971 | 9.5  | Poly(A) binding protein, cytoplasmic 4                                                                                                                                                                             |
| 1453 | Q13310           | 4                    | 7              | 25.2                  | 644    | 70783 | 9.3  | Polyadenylate-binding protein 4 (Poly(A)-binding protein 4) (PABP 4) (Inducible poly(A)-binding protein)                                                                                                           |
| 1453 | Q6IQ30           | 4                    | 7              | 24.5                  | 660    | 72361 | 9.3  | PABPC4 protein                                                                                                                                                                                                     |
| 1453 | Q5SPS6           | 4                    | 7              | 24.5                  | 660    | 72391 | 9.3  | Poly(A) binding protein, cytoplasmic 4                                                                                                                                                                             |
| 1454 | gi 12345 prg     | 4                    | 1466           | 26                    | 223    | 23476 | 7.9  | Promega sequencing grade modified trypsin                                                                                                                                                                          |
| 1454 | IPITrypsinPIG    | 4                    | 1466           | 25.1                  | 231    | 24409 | 7.2  | TRYP_PIG                                                                                                                                                                                                           |
| 1455 | P13987           | 4                    | 106            | 25                    | 128    | 14177 | 6.5  | CD59 glycoprotein precursor                                                                                                                                                                                        |
| 1456 | Q16527           | 4                    | 14             | 24.9                  | 193    | 20954 | 8.6  | Cysteine and glycine-rich protein 2                                                                                                                                                                                |
| 1457 | Q9UL26           | 4                    | 13             | 24.7                  | 194    | 21855 | 8.2  | Ras-related protein Rab-22A                                                                                                                                                                                        |
| 1458 | Q9H444           | 4                    | 7              | 24.6                  | 224    | 24950 | 4.8  | Charged multivesicular body protein 4b                                                                                                                                                                             |
| 1459 | Q96EK6           | 4                    | 9              | 24.5                  | 184    | 20749 | 8    | Glucosamine 6-phosphate N-acetyltransferase                                                                                                                                                                        |
| 1460 | Q9UM00-2         | 4                    | 27             | 27.2                  | 169    | 18766 | 9.6  | Isoform 2 of Q9UM00                                                                                                                                                                                                |



| No.  | Accession Number | Unique Peptide Count | Spectrum Count | Sequence Coverage (%) | Length | MolWt | pI   | Descriptive Name                                                                                                                                                                                 |
|------|------------------|----------------------|----------------|-----------------------|--------|-------|------|--------------------------------------------------------------------------------------------------------------------------------------------------------------------------------------------------|
| 1460 | Q9UM00           | 4                    | 27             | 24.5                  | 188    | 21175 | 9.7  | Transmembrane and coiled-coil domain-containing protein 1                                                                                                                                        |
| 1461 | P49721           | 4                    | 53             | 24.4                  | 201    | 22836 | 7    | Proteasome subunit beta type 2                                                                                                                                                                   |
| 1462 | Q9Y3D6           | 4                    | 39             | 24.3                  | 152    | 16938 | 8.8  | Mitochondrial fission 1 protein                                                                                                                                                                  |
| 1462 | UPI0000073ACD    | 4                    | 39             | 24.3                  | 152    | 16980 | 8.8  | tetratricopeptide repeat domain 11                                                                                                                                                               |
| 1463 | Q9UF68           | 4                    | 4              | 24.1                  | 270    | 30658 | 7    | Hypothetical protein DKFZp434A149                                                                                                                                                                |
| 1463 | Q6BCY4           | 4                    | 4              | 23.6                  | 276    | 31458 | 8.5  | Cytochrome b5 reductase 2                                                                                                                                                                        |
| 1464 | UPI00001405F0    | 4                    | 16             | 25.9                  | 270    | 29500 | 7    | calponin 2 isoform b                                                                                                                                                                             |
| 1464 | Q53GK7           | 4                    | 16             | 22.7                  | 309    | 33621 | 7.6  | Calponin 2 isoform a variant                                                                                                                                                                     |
| 1464 | Q99439           | 4                    | 16             | 22.7                  | 309    | 33697 | 7.3  | Calponin-2                                                                                                                                                                                       |
| 1464 | Q6FHE4           | 4                    | 16             | 22.7                  | 309    | 33709 | 7.3  | CNN2 protein                                                                                                                                                                                     |
| 1465 | Q9NQ88           | 4                    | 17             | 22.6                  | 270    | 30063 | 7.7  | Uncharacterized protein C12orf5                                                                                                                                                                  |
| 1466 | Q15202           | 4                    | 81             | 22.9                  | 109    | 11959 | 3.7  | Prothymosin alpha                                                                                                                                                                                |
| 1466 | Q8TBK9           | 4                    | 81             | 22.7                  | 110    | 12016 | 3.8  | Prothymosin, alpha                                                                                                                                                                               |
| 1466 | Q86YS2           | 4                    | 81             | 22.7                  | 110    | 12044 | 3.8  | Prothymosin alpha protein                                                                                                                                                                        |
| 1466 | Q5VYG3           | 4                    | 81             | 22.7                  | 110    | 12055 | 3.8  | OTTHUMP00000018545                                                                                                                                                                               |
| 1466 | Q15204           | 4                    | 81             | 22.7                  | 110    | 12047 | 3.7  | Prothymosin alpha                                                                                                                                                                                |
| 1466 | Q15200           | 4                    | 81             | 22.7                  | 110    | 12085 | 3.8  | Prothymosin alpha                                                                                                                                                                                |
| 1466 | P06454-2         | 4                    | 81             | 22.7                  | 110    | 12074 | 3.8  | Isoform 2 of P06454                                                                                                                                                                              |
| 1466 | P06454           | 4                    | 81             | 22.5                  | 111    | 12203 | 3.8  | Prothymosin alpha [Contains: Thymosin alpha-1]                                                                                                                                                   |
| 1467 | Q92522           | 4                    | 42             | 22.5                  | 213    | 22487 | 10.8 | Histone H1x                                                                                                                                                                                      |
| 1468 | Q9BYN8           | 4                    | 4              | 22.4                  | 205    | 24212 | 10.4 | 28S ribosomal protein S26, mitochondrial precursor                                                                                                                                               |
| 1469 | P30042           | 4                    | 22             | 22                    | 268    | 28170 | 8.3  | ES1 protein homolog, mitochondrial precursor                                                                                                                                                     |
| 1470 | P15927           | 4                    | 10             | 21.9                  | 270    | 29247 | 6.1  | Replication protein A 32 kDa subunit                                                                                                                                                             |
| 1470 | P15927-2         | 4                    | 10             | 21.2                  | 278    | 30156 | 7    | Isoform 2 of P15927                                                                                                                                                                              |
| 1470 | P15927-3         | 4                    | 10             | 16.5                  | 358    | 38810 | 8.9  | Isoform 3 of P15927                                                                                                                                                                              |
| 1471 | Q9NRX1           | 4                    | 10             | 21.8                  | 252    | 27924 | 9.7  | RNA-binding protein PNO1                                                                                                                                                                         |
| 1472 | P13984           | 4                    | 9              | 21.7                  | 249    | 28380 | 9.2  | Transcription initiation factor IIF subunit beta                                                                                                                                                 |
| 1472 | UPI00004566E9    | 4                    | 9              | 21.6                  | 250    | 28473 | 9.3  | Transcription initiation factor IIF subunit beta (EC 3.6.1.-) (TFIIF-beta) (ATP-dependent helicase GTF2F2) (General transcription factor IIF subunit 2) (Transcription initiation factor RAP30). |
| 1473 | P61009           | 4                    | 11             | 21.7                  | 180    | 20313 | 8.6  | Signal peptidase complex subunit 3                                                                                                                                                               |
| 1473 | UPI00004572A7    | 4                    | 11             | 21.3                  | 183    | 20779 | 9.3  | Signal peptidase complex subunit 3 (EC 3.4.-.-) (Microsomal signal peptidase 23 kDa subunit) (SPase 22 kDa subunit) (SPC22/23).                                                                  |
| 1474 | Q96GC5           | 4                    | 9              | 21.7                  | 212    | 23935 | 9    | 39S ribosomal protein L48, mitochondrial precursor                                                                                                                                               |
| 1475 | Q9Y296           | 4                    | 5              | 21.5                  | 219    | 24340 | 6.2  | Trafficking protein particle complex subunit 4                                                                                                                                                   |
| 1476 | Q96HX4           | 4                    | 8              | 21.5                  | 274    | 28649 | 7.5  | Pyrroline-5-carboxylate reductase-like                                                                                                                                                           |
| 1476 | Q53H96           | 4                    | 8              | 21.4                  | 276    | 28886 | 7.5  | Pyrroline-5-carboxylate reductase-like protein                                                                                                                                                   |
| 1477 | Q96C86           | 4                    | 7              | 21.4                  | 337    | 38609 | 6.4  | Scavenger mRNA-decapping enzyme DcpS                                                                                                                                                             |
| 1478 | O14828           | 4                    | 19             | 21.3                  | 347    | 38319 | 7.6  | Secretory carrier-associated membrane protein 3                                                                                                                                                  |

| No.  | Accession Number | Unique Peptide Count | Spectrum Count | Sequence Coverage (%) | Length | MolWt  | pI   | Descriptive Name                                                                                                                                                                                                                                   |
|------|------------------|----------------------|----------------|-----------------------|--------|--------|------|----------------------------------------------------------------------------------------------------------------------------------------------------------------------------------------------------------------------------------------------------|
| 1478 | UPI0000456274    | 4                    | 19             | 21.3                  | 347    | 38315  | 7.2  | Secretory carrier-associated membrane protein 3 (Secretory carrier membrane protein 3).                                                                                                                                                            |
| 1478 | Q6FHJ5           | 4                    | 19             | 21.3                  | 347    | 38243  | 7.6  | SCAMP3 protein                                                                                                                                                                                                                                     |
| 1478 | Q4VX17           | 4                    | 19             | 21.3                  | 347    | 38287  | 7.6  | Secretory carrier membrane protein 3                                                                                                                                                                                                               |
| 1479 | Q53FX5           | 4                    | 15             | 21.3                  | 197    | 21820  | 8    | Lin-7 homolog C variant                                                                                                                                                                                                                            |
| 1479 | Q9NUP9           | 4                    | 15             | 21.3                  | 197    | 21834  | 8.4  | Lin-7 homolog C                                                                                                                                                                                                                                    |
| 1480 | Q6V3B2           | 4                    | 10             | 21.3                  | 221    | 25726  | 6.1  | FK506-binding protein 7                                                                                                                                                                                                                            |
| 1480 | Q9Y680-2         | 4                    | 10             | 21.2                  | 222    | 25794  | 6.3  | Isoform 2 of Q9Y680                                                                                                                                                                                                                                |
| 1480 | UPI0000456EAC    | 4                    | 10             | 18.4                  | 256    | 29688  | 6.5  | FK506-binding protein 7 precursor (EC 5.2.1.8) (Peptidyl-prolyl cis-trans isomerase) (PPlase) (Rotamase) (FKBP-23).                                                                                                                                |
| 1480 | Q9Y680           | 4                    | 10             | 18.1                  | 259    | 30009  | 6.5  | FK506-binding protein 7 precursor                                                                                                                                                                                                                  |
| 1481 | P09496-2         | 4                    | 24             | 21.1                  | 218    | 23662  | 4.5  | Isoform Non                                                                                                                                                                                                                                        |
| 1482 | Q6DKI1           | 4                    | 10             | 21.1                  | 246    | 28661  | 10.5 | Ribosomal protein L7-like 1                                                                                                                                                                                                                        |
| 1483 | P36969-2         | 4                    | 14             | 24.1                  | 170    | 19478  | 7.9  | Isoform Cytoplasmic of P36969                                                                                                                                                                                                                      |
| 1483 | P36969           | 4                    | 14             | 20.8                  | 197    | 22128  | 8.3  | Phospholipid hydroperoxide glutathione peroxidase, mitochondrial precursor                                                                                                                                                                         |
| 1483 | UPI00001AAC3F    | 4                    | 14             | 20.8                  | 197    | 22025  | 8.4  | glutathione peroxidase 4 isoform A precursor                                                                                                                                                                                                       |
| 1483 | Q6PI42           | 4                    | 14             | 20.8                  | 197    | 22166  | 8.4  | Glutathione peroxidase 4                                                                                                                                                                                                                           |
| 1483 | UPI000096F213    | 4                    | 14             | 17.5                  | 234    | 26948  | 10.1 | glutathione peroxidase 4 isoform C precursor                                                                                                                                                                                                       |
| 1484 | Q9BUL8           | 4                    | 12             | 20.8                  | 212    | 24702  | 8.2  | Programmed cell death protein 10                                                                                                                                                                                                                   |
| 1485 | P35219           | 4                    | 8              | 20.7                  | 290    | 32973  | 4.9  | Carbonic anhydrase-related protein                                                                                                                                                                                                                 |
| 1486 | O43402           | 4                    | 10             | 20.5                  | 210    | 23773  | 6.4  | Neighbor of COX4                                                                                                                                                                                                                                   |
| 1487 | P62341           | 4                    | 7              | 20.5                  | 195    | 22277  | 8.5  | Selenoprotein T precursor                                                                                                                                                                                                                          |
| 1487 | UPI000034ECC3    | 4                    | 7              | 20.5                  | 195    | 22174  | 8.6  | selenoprotein T                                                                                                                                                                                                                                    |
| 1488 | P11233           | 4                    | 25             | 20.4                  | 206    | 23567  | 7.1  | Ras-related protein Ral-A precursor                                                                                                                                                                                                                |
| 1489 | O00422           | 4                    | 8              | 20.3                  | 153    | 17561  | 9.4  | Histone deacetylase complex subunit SAP18                                                                                                                                                                                                          |
| 1490 | P09012           | 4                    | 31             | 20.2                  | 282    | 31280  | 9.8  | U1 small nuclear ribonucleoprotein A                                                                                                                                                                                                               |
| 1491 | UPI0000457067    | 4                    | 26             | 20.9                  | 919    | 101348 | 5.1  | AP-1 complex subunit beta-1 (Adapter-related protein complex 1 beta-1 subunit) (Beta-adaptin 1) (Adaptor protein complex AP-1 beta-1 subunit) (Golgi adaptor HA1/AP1 adaptin beta subunit) (Clathrin assembly protein complex 1 beta large chain). |
| 1491 | Q86X54           | 4                    | 26             | 20.9                  | 919    | 101318 | 5.1  | AP1B1 protein                                                                                                                                                                                                                                      |
| 1491 | UPI0000140030    | 4                    | 26             | 20.4                  | 942    | 103921 | 5.1  | adaptor-related protein complex 1 beta 1 subunit isoform b                                                                                                                                                                                         |
| 1491 | Q20WL3           | 4                    | 26             | 20.4                  | 939    | 103534 | 5.2  | AP1B1 protein                                                                                                                                                                                                                                      |
| 1491 | Q10567-2         | 4                    | 26             | 20.4                  | 942    | 103891 | 5.1  | Isoform B of Q10567                                                                                                                                                                                                                                |
| 1491 | Q10567           | 4                    | 26             | 20.2                  | 949    | 104607 | 5.1  | AP-1 complex subunit beta-1                                                                                                                                                                                                                        |
| 1491 | UPI000013CED0    | 4                    | 26             | 20.2                  | 949    | 104637 | 5.1  | adaptor-related protein complex 1 beta 1 subunit isoform a                                                                                                                                                                                         |

| No.  | Accession Number | Unique Peptide Count | Spectrum Count | Sequence Coverage (%) | Length | MolWt | pI   | Descriptive Name                                                                                                                      |
|------|------------------|----------------------|----------------|-----------------------|--------|-------|------|---------------------------------------------------------------------------------------------------------------------------------------|
| 1492 | Q16740           | 4                    | 10             | 20.2                  | 277    | 30180 | 8.1  | Putative ATP-dependent Clp protease proteolytic subunit, mitochondrial precursor                                                      |
| 1493 | Q96QR8           | 4                    | 15             | 20.2                  | 312    | 33241 | 5.4  | Transcriptional activator protein Pur-beta                                                                                            |
| 1494 | Q96CN7           | 4                    | 9              | 20.1                  | 298    | 32237 | 7.4  | Isochorismatase domain-containing protein 1                                                                                           |
| 1495 | Q9H8S9           | 4                    | 12             | 19.9                  | 216    | 25080 | 7    | Mps one binder kinase activator-like 1B                                                                                               |
| 1495 | UPI0000047AC8    | 4                    | 12             | 19.9                  | 216    | 25008 | 7.2  | Mob4B protein                                                                                                                         |
| 1496 | Q5T3I2           | 4                    | 19             | 19.8                  | 288    | 31675 | 7.7  | Apolipoprotein A-I-binding protein                                                                                                    |
| 1496 | Q8NCW5           | 4                    | 19             | 19.8                  | 288    | 31689 | 7.7  | ApoA-I binding protein precursor                                                                                                      |
| 1497 | Q3SY19           | 4                    | 24             | 19.4                  | 247    | 26556 | 4.8  | PRSS1 protein                                                                                                                         |
| 1498 | P42765           | 4                    | 7              | 19.1                  | 397    | 41924 | 8.1  | 3-ketoacyl-CoA thiolase, mitochondrial                                                                                                |
| 1498 | UPI0000136E5A    | 4                    | 7              | 19.1                  | 397    | 42039 | 8.3  | acetyl-coenzyme A acyltransferase 2                                                                                                   |
| 1499 | P55209           | 4                    | 17             | 18.9                  | 391    | 45374 | 4.5  | Nucleosome assembly protein 1-like 1                                                                                                  |
| 1500 | O95330           | 4                    | 19             | 18.7                  | 198    | 22396 | 6.4  | Hypothetical protein                                                                                                                  |
| 1500 | UPI0000D61079    | 4                    | 19             | 14.9                  | 248    | 28113 | 5.5  | Endoplasmic reticulum-Golgi intermediate compartment protein 3 (Serologically defined breast cancer antigen NY-BR-84).                |
| 1500 | Q9Y282           | 4                    | 19             | 9.7                   | 383    | 43222 | 6.1  | Endoplasmic reticulum-Golgi intermediate compartment protein 3                                                                        |
| 1500 | UPI0000456F87    | 4                    | 19             | 9.5                   | 390    | 44008 | 5.9  | Endoplasmic reticulum-Golgi intermediate compartment protein 3 (Serologically defined breast cancer antigen NY-BR-84).                |
| 1500 | Q5JWS3           | 4                    | 19             | 9.5                   | 388    | 43772 | 6    | ERGIC and golgi 3                                                                                                                     |
| 1500 | Q5JWS0           | 4                    | 19             | 9.3                   | 396    | 44568 | 6.5  | ERGIC and golgi 3                                                                                                                     |
| 1501 | P51809           | 4                    | 18             | 18.6                  | 220    | 24935 | 8.6  | Synaptobrevin-like protein 1                                                                                                          |
| 1502 | Q66K91           | 4                    | 20             | 19                    | 231    | 23656 | 10.9 | Small nuclear ribonucleoprotein polypeptides B and B1                                                                                 |
| 1502 | Q5XPV6           | 4                    | 20             | 19                    | 231    | 23657 | 10.7 | Small nuclear ribonucleoprotein polypeptide B                                                                                         |
| 1502 | Q6PKB4           | 4                    | 20             | 18.8                  | 234    | 24088 | 10.8 | SNRPB protein                                                                                                                         |
| 1502 | UPI0000D612F2    | 4                    | 20             | 18.6                  | 236    | 26362 | 9.3  | Small nuclear ribonucleoprotein-associated protein N (snRNP-N) (Sm protein N) (Sm-N) (SmN) (Sm-D) (Tissue-specific-splicing protein). |
| 1502 | P14678           | 4                    | 20             | 18.3                  | 240    | 24610 | 11.2 | Small nuclear ribonucleoprotein-associated proteins B and B'                                                                          |
| 1502 | P63162           | 4                    | 20             | 18.3                  | 240    | 24614 | 11.2 | Small nuclear ribonucleoprotein-associated protein N                                                                                  |
| 1502 | UPI0000D6101C    | 4                    | 20             | 18.2                  | 242    | 27236 | 9.4  | Small nuclear ribonucleoprotein-associated proteins B and B' (snRNP-B) (Sm protein B/B') (Sm-B/Sm-B') (SmB/SmB').                     |
| 1502 | Q9UIS4           | 4                    | 20             | 18.1                  | 243    | 27267 | 9.4  | Small nuclear ribonucleoprotein B'                                                                                                    |
| 1502 | Q15182           | 4                    | 20             | 15.4                  | 285    | 29671 | 10.1 | SNRPB protein                                                                                                                         |

| No.  | Accession Number | Unique Peptide Count | Spectrum Count | Sequence Coverage (%) | Length | MolWt | pI   | Descriptive Name                                                                                                                                               |
|------|------------------|----------------------|----------------|-----------------------|--------|-------|------|----------------------------------------------------------------------------------------------------------------------------------------------------------------|
| 1502 | UPI0000D6101B    | 4                    | 20             | 15.3                  | 287    | 29862 | 10.2 | Small nuclear ribonucleoprotein-associated proteins B and B' (snRNP-B) (Sm protein B/B') (Sm-B/Sm-B') (SmB/SmB').                                              |
| 1502 | P14678-3         | 4                    | 20             | 15.2                  | 289    | 30032 | 10.2 | Isoform SM                                                                                                                                                     |
| 1503 | O75937           | 4                    | 6              | 18.2                  | 253    | 29842 | 9.1  | DnaJ homolog subfamily C member 8                                                                                                                              |
| 1503 | UPI0000456194    | 4                    | 6              | 17.5                  | 263    | 30829 | 8.9  | DnaJ homolog subfamily C member 8 (Splicing protein spf31).                                                                                                    |
| 1504 | Q8TB70           | 4                    | 8              | 21.8                  | 188    | 22199 | 5.8  | TXNDC9 protein                                                                                                                                                 |
| 1504 | O14530           | 4                    | 8              | 18.1                  | 226    | 26534 | 5.9  | Thioredoxin domain-containing protein 9                                                                                                                        |
| 1504 | Q53HG4           | 4                    | 8              | 18.1                  | 226    | 26535 | 5.7  | ATP binding protein associated with cell differentiation variant                                                                                               |
| 1505 | Q13951           | 4                    | 9              | 18.1                  | 182    | 21508 | 6.6  | Core-binding factor subunit beta                                                                                                                               |
| 1506 | P43307           | 4                    | 14             | 17.8                  | 286    | 32235 | 4.5  | Translocon-associated protein subunit alpha precursor                                                                                                          |
| 1506 | UPI000016789F    | 4                    | 14             | 17.8                  | 286    | 32183 | 4.5  | signal sequence receptor, alpha                                                                                                                                |
| 1507 | Q96GG9           | 4                    | 5              | 17.8                  | 259    | 30124 | 5.3  | DCN1-like protein 1                                                                                                                                            |
| 1507 | UPI000013E0D4    | 4                    | 5              | 17.8                  | 258    | 29993 | 5.3  | DCN1-like protein 1 (Defective in cullin neddylation protein 1-like protein 1) (DCUN1 domain-containing protein 1) (Squamous cell carcinoma-related oncogene). |
| 1508 | Q9BYD2           | 4                    | 6              | 17.6                  | 267    | 30185 | 10.1 | 39S ribosomal protein L9, mitochondrial precursor                                                                                                              |
| 1508 | UPI000013D8FA    | 4                    | 6              | 17.6                  | 267    | 30243 | 10.1 | mitochondrial ribosomal protein L9                                                                                                                             |
| 1509 | Q9UBV8           | 4                    | 11             | 17.6                  | 284    | 30381 | 6.5  | Peflin                                                                                                                                                         |
| 1510 | Q6IN49           | 4                    | 6              | 17.5                  | 332    | 37490 | 7.9  | Cysteine and histidine-rich domain-containing protein 1                                                                                                        |
| 1510 | Q9UHD1           | 4                    | 6              | 17.5                  | 332    | 37437 | 7.7  | CHORD containing protein-1                                                                                                                                     |
| 1511 | O75822           | 4                    | 11             | 17.4                  | 258    | 29062 | 4.8  | Eukaryotic translation initiation factor 3 subunit 1                                                                                                           |
| 1512 | O94905           | 4                    | 11             | 17.4                  | 339    | 37840 | 5.6  | SPFH domain-containing protein 2 precursor                                                                                                                     |
| 1513 | Q96A35           | 4                    | 7              | 17.1                  | 216    | 24915 | 9.3  | 39S ribosomal protein L24, mitochondrial precursor                                                                                                             |
| 1514 | Q53H82           | 4                    | 13             | 17                    | 288    | 32790 | 6.8  | Lactamase beta-2                                                                                                                                               |
| 1514 | Q9Y392           | 4                    | 13             | 17                    | 288    | 32806 | 6.8  | CGI-83 protein                                                                                                                                                 |
| 1515 | Q9UKK9           | 4                    | 9              | 16.9                  | 219    | 24328 | 4.9  | ADP-sugar pyrophosphatase                                                                                                                                      |
| 1515 | UPI000059D108    | 4                    | 9              | 15.9                  | 232    | 25895 | 5.2  | ADP-sugar pyrophosphatase (EC 3.6.1.13) (EC 3.6.1.-) (Nucleoside diphosphate-linked moiety X motif 5) (Nudix motif 5) (YSA1H).                                 |
| 1516 | Q6P1N9           | 4                    | 6              | 16.8                  | 297    | 33572 | 7    | TatD DNase domain-containing protein 1                                                                                                                         |
| 1516 | Q9BY40           | 4                    | 6              | 16.8                  | 297    | 33602 | 7    | CDA11                                                                                                                                                          |
| 1517 | Q7L5N1           | 4                    | 7              | 16.8                  | 327    | 36163 | 5.7  | COP9 signalosome complex subunit 6                                                                                                                             |
| 1518 | Q53Y37           | 4                    | 9              | 16.6                  | 211    | 23181 | 4.7  | Clathrin, light polypeptide                                                                                                                                    |
| 1519 | Q9H8Y8           | 4                    | 7              | 16.4                  | 452    | 47145 | 4.8  | Golgi reassembly-stacking protein 2                                                                                                                            |
| 1520 | O43765           | 4                    | 14             | 16.3                  | 313    | 34063 | 4.9  | Small glutamine-rich tetratricopeptide repeat-containing protein A                                                                                             |
| 1521 | O60711           | 4                    | 5              | 16.3                  | 386    | 43332 | 6    | Leupaxin                                                                                                                                                       |
| 1521 | Q53FW6           | 4                    | 5              | 16.3                  | 386    | 43346 | 6    | Leupaxin variant                                                                                                                                               |

| No.  | Accession Number | Unique Peptide Count | Spectrum Count | Sequence Coverage (%) | Length | MolWt | pI   | Descriptive Name                                                                                                                                                    |
|------|------------------|----------------------|----------------|-----------------------|--------|-------|------|---------------------------------------------------------------------------------------------------------------------------------------------------------------------|
| 1522 | Q96DH6-2         | 4                    | 10             | 21.1                  | 251    | 28421 | 8.5  | Isoform 2 of Q96DH6                                                                                                                                                 |
| 1522 | Q96DH6           | 4                    | 10             | 16.2                  | 328    | 35197 | 8.5  | RNA-binding protein Musashi homolog 2                                                                                                                               |
| 1523 | Q9H7Z7           | 4                    | 8              | 16.2                  | 377    | 41943 | 9.2  | Prostaglandin E synthase 2 (EC 5.3.99.3) (Microsomal prostaglandin E synthase 2) (mPGES-2) [Contains: Prostaglandin E synthase 2 truncated form]                    |
| 1524 | Q9UBE0           | 4                    | 19             | 16.2                  | 346    | 38450 | 5.3  | SUMO-activating enzyme subunit 1                                                                                                                                    |
| 1525 | Q15435-2         | 4                    | 11             | 18.3                  | 317    | 36837 | 5.2  | Isoform 2 of Q15435                                                                                                                                                 |
| 1525 | Q15435           | 4                    | 11             | 16.1                  | 360    | 41564 | 4.9  | Protein phosphatase 1 regulatory subunit 7                                                                                                                          |
| 1526 | Q8NBU5           | 4                    | 10             | 16.1                  | 361    | 40744 | 6.9  | ATPase family AAA domain-containing protein 1                                                                                                                       |
| 1527 | P62995-3         | 4                    | 34             | 24.5                  | 188    | 21935 | 10.2 | Isoform 3 of P62995                                                                                                                                                 |
| 1527 | Q68DZ9           | 4                    | 34             | 16.7                  | 276    | 32321 | 11.4 | Hypothetical protein DKFZp686F18120                                                                                                                                 |
| 1527 | Q59GA1           | 4                    | 34             | 16.5                  | 278    | 32274 | 11.1 | Splicing factor, arginine/serine-rich 10 (Transformer 2 homolog, Drosophila) variant                                                                                |
| 1527 | P62995           | 4                    | 34             | 16                    | 288    | 33666 | 11.2 | Arginine/serine-rich-splicing factor 10                                                                                                                             |
| 1527 | UPI0000D61BC0    | 4                    | 34             | 15.9                  | 289    | 33699 | 10.8 | Arginine/serine-rich-splicing factor 10 (Transformer-2-beta) (HTRA2-beta) (Transformer 2 protein homolog).                                                          |
| 1528 | Q12904           | 4                    | 10             | 16                    | 312    | 34353 | 8.4  | Multisynthetase complex auxiliary component p43 [Contains: Endothelial monocyte-activating polypeptide 2 (EMAP-II) (Small inducible cytokine subfamily E member 1)] |
| 1529 | Q9BYG3           | 4                    | 10             | 16                    | 293    | 34222 | 9.9  | MKI67 FHA domain-interacting nucleolar phosphoprotein                                                                                                               |
| 1529 | UPI000006F493    | 4                    | 10             | 16                    | 293    | 34253 | 9.9  | MKI67 (FHA domain) interacting nucleolar phosphoprotein                                                                                                             |
| 1530 | P53582           | 4                    | 7              | 15.8                  | 386    | 43215 | 7.2  | Methionine aminopeptidase 1                                                                                                                                         |
| 1531 | Q59FA6           | 4                    | 13             | 16.8                  | 303    | 33553 | 6.2  | SEC13-like 1 isoform b variant                                                                                                                                      |
| 1531 | P55735           | 4                    | 13             | 15.8                  | 322    | 35541 | 5.5  | Protein SEC13 homolog                                                                                                                                               |
| 1532 | O95861           | 4                    | 6              | 15.6                  | 308    | 33392 | 5.7  | 3'(2'),5'-bisphosphate nucleotidase 1                                                                                                                               |
| 1533 | Q9GZL7           | 4                    | 6              | 15.6                  | 423    | 47708 | 5.9  | WD repeat protein 12                                                                                                                                                |
| 1533 | UPI000015F4D0    | 4                    | 6              | 15.6                  | 423    | 47544 | 6    | WD repeat domain 12 protein                                                                                                                                         |
| 1534 | Q9NQG5           | 4                    | 5              | 15.6                  | 326    | 36900 | 6    | Uncharacterized protein C20orf77                                                                                                                                    |
| 1535 | O75251           | 4                    | 15             | 15.5                  | 213    | 23564 | 10   | NADH dehydrogenase [ubiquinone] iron-sulfur protein 7, mitochondrial precursor                                                                                      |
| 1535 | UPI0000130964    | 4                    | 15             | 15.5                  | 213    | 23580 | 10   | NADH-ubiquinone oxidoreductase Fe-S protein 7                                                                                                                       |
| 1535 | Q8NAS7           | 4                    | 15             | 15.5                  | 213    | 22962 | 9.4  | CDNA FLJ34850 fis, clone NT2NE2011758, highly similar to NADH- UBIQUINONE OXIDOREDUCTASE 20 kDa SUBUNIT                                                             |
| 1536 | Q6PD63           | 4                    | 23             | 15.5                  | 362    | 43160 | 8.9  | Protein tyrosine phosphatase-like A domain containing 1                                                                                                             |

| No.  | Accession Number | Unique Peptide Count | Spectrum Count | Sequence Coverage (%) | Length | MolWt | pI   | Descriptive Name                                                                             |
|------|------------------|----------------------|----------------|-----------------------|--------|-------|------|----------------------------------------------------------------------------------------------|
| 1536 | Q96T12           | 4                    | 23             | 15.5                  | 362    | 43159 | 9.1  | CDNA FLJ14515 fis, clone NT2RM1000800, weakly similar to Mus musculus partial B-IND1 protein |
| 1536 | Q8NC86           | 4                    | 23             | 15.5                  | 362    | 43126 | 8.9  | CDNA FLJ90417 fis, clone NT2RP3000171, weakly similar to Mus musculus partial B-IND1 protein |
| 1536 | Q8IUI5           | 4                    | 23             | 15.5                  | 361    | 42908 | 9    | PTPLAD1 protein                                                                              |
| 1536 | Q9NQA7           | 4                    | 23             | 15.1                  | 370    | 43543 | 8    | B-ind1 protein                                                                               |
| 1536 | UPI0000D61358    | 4                    | 23             | 15                    | 373    | 44323 | 9.2  | butyrate-induced transcript 1                                                                |
| 1536 | Q9P035           | 4                    | 23             | 15                    | 373    | 44423 | 9.1  | Protein-tyrosine phosphatase-like A domain-containing protein 1                              |
| 1537 | Q96FW1           | 4                    | 10             | 15.5                  | 271    | 31284 | 4.9  | Ubiquitin thioesterase OTUB1                                                                 |
| 1538 | UPI0000203595    | 4                    | 10             | 21.6                  | 236    | 26072 | 5.6  | regulator of G-protein signalling 19 interacting protein 1 isoform 2                         |
| 1538 | O14908           | 4                    | 10             | 15.3                  | 333    | 36049 | 6.3  | PDZ domain-containing protein GIPC1                                                          |
| 1539 | Q86XR1           | 4                    | 17             | 16                    | 238    | 26108 | 9.1  | Prion protein                                                                                |
| 1539 | Q540C4           | 4                    | 17             | 15.4                  | 246    | 26884 | 9.3  | Prion protein                                                                                |
| 1539 | A2A2V1           | 4                    | 17             | 15.3                  | 249    | 27279 | 9    | Prion protein                                                                                |
| 1539 | A1YVW6           | 4                    | 17             | 15                    | 253    | 27703 | 9.1  | Prion protein                                                                                |
| 1539 | Q6FGR8           | 4                    | 17             | 15                    | 253    | 27599 | 9.1  | PRNP protein                                                                                 |
| 1539 | Q6FGN5           | 4                    | 17             | 15                    | 253    | 27629 | 9    | Major prion protein                                                                          |
| 1539 | Q27H91           | 4                    | 17             | 15                    | 253    | 27635 | 9    | Prion protein PrP                                                                            |
| 1539 | P04156           | 4                    | 17             | 15                    | 253    | 27661 | 9    | Major prion protein precursor                                                                |
| 1539 | Q6SES1           | 4                    | 17             | 13.7                  | 277    | 29992 | 9    | Prion protein                                                                                |
| 1539 | O75942           | 4                    | 17             | 13.3                  | 285    | 30768 | 9    | Prion protein                                                                                |
| 1540 | Q08170           | 4                    | 13             | 15                    | 494    | 56678 | 11.5 | Splicing factor, arginine/serine-rich 4                                                      |
| 1541 | Q8NBJ7           | 4                    | 18             | 15                    | 301    | 33857 | 8    | Sulfatase-modifying factor 2 precursor                                                       |
| 1541 | UPI000013E405    | 4                    | 18             | 15                    | 301    | 33843 | 8    | Sulfatase-modifying factor 2 precursor (C-alpha-formylglycine-generating enzyme 2).          |
| 1541 | UPI0000DAC779    | 4                    | 18             | 14.8                  | 304    | 34290 | 8.4  | sulfatase modifying factor 2 isoform a precursor                                             |
| 1542 | Q9NUJ1           | 4                    | 18             | 15                    | 306    | 33933 | 8.6  | Abhydrolase domain-containing protein 10, mitochondrial precursor                            |
| 1543 | P31153           | 4                    | 23             | 14.7                  | 395    | 43661 | 6.5  | S-adenosylmethionine synthetase isoform type-2                                               |
| 1543 | UPI0000DB12F5    | 4                    | 23             | 14.6                  | 396    | 43748 | 6.5  | S-adenosylmethionine synthetase isoform type-                                                |
| 1544 | P19623           | 4                    | 10             | 14.6                  | 302    | 33825 | 5.5  | Spermidine synthase                                                                          |
| 1545 | P61201           | 4                    | 6              | 14.4                  | 443    | 51597 | 5.5  | COP9 signalosome complex subunit 2                                                           |
| 1545 | Q53HJ0           | 4                    | 6              | 14.4                  | 443    | 51570 | 5.5  | COP9 constitutive photomorphogenic homolog subunit 2 variant                                 |
| 1546 | Q05BK6           | 4                    | 9              | 14.2                  | 366    | 40691 | 6.4  | TFG protein                                                                                  |
| 1546 | Q7Z426           | 4                    | 9              | 13.1                  | 396    | 43006 | 5.2  | Putative MAPK activating protein                                                             |
| 1546 | Q969I2           | 4                    | 9              | 13                    | 400    | 43448 | 5.1  | TRK-fused gene                                                                               |
| 1546 | Q92734           | 4                    | 9              | 13                    | 400    | 43434 | 5.1  | Protein TFG                                                                                  |
| 1546 | Q8TDJ5           | 4                    | 9              | 6.5                   | 803    | 88671 | 6.3  | TRK-fused gene/anaplastic large cell lymphoma kinase extra long form                         |
| 1547 | Q15654           | 4                    | 8              | 14.1                  | 476    | 50288 | 7.4  | Thyroid receptor-interacting protein 6                                                       |

| No.  | Accession Number | Unique Peptide Count | Spectrum Count | Sequence Coverage (%) | Length | MolWt | pI   | Descriptive Name                                                                                                                                                                                                            |
|------|------------------|----------------------|----------------|-----------------------|--------|-------|------|-----------------------------------------------------------------------------------------------------------------------------------------------------------------------------------------------------------------------------|
| 1548 | UPI000006FDB9    | 4                    | 8              | 14.4                  | 397    | 41296 | 6.7  | acetyl-Coenzyme A acetyltransferase 2                                                                                                                                                                                       |
| 1548 | Q9BWD1           | 4                    | 8              | 14.4                  | 397    | 41351 | 6.9  | Acetyl-CoA acetyltransferase, cytosolic                                                                                                                                                                                     |
| 1548 | Q59GW6           | 4                    | 8              | 14.1                  | 404    | 42136 | 7.4  | Acetyl-CoA acetyltransferase, cytosolic variant                                                                                                                                                                             |
| 1549 | Q96G23           | 4                    | 6              | 13.9                  | 380    | 44876 | 9    | LAG1 longevity assurance homolog 2                                                                                                                                                                                          |
| 1550 | Q9H3N1           | 4                    | 26             | 13.9                  | 280    | 31791 | 5    | Thioredoxin domain-containing protein 1 precursor                                                                                                                                                                           |
| 1550 | UPI000006E5F1    | 4                    | 26             | 13.9                  | 280    | 31806 | 5    | thioredoxin domain containing                                                                                                                                                                                               |
| 1551 | Q9UI12-2         | 4                    | 12             | 14.4                  | 465    | 54151 | 6.5  | Isoform 2 of Q9UI12                                                                                                                                                                                                         |
| 1551 | Q9UI12           | 4                    | 12             | 13.9                  | 483    | 55883 | 6.5  | Vacuolar ATP synthase subunit H                                                                                                                                                                                             |
| 1552 | P48509           | 4                    | 35             | 13.8                  | 253    | 28295 | 7.5  | CD151 antigen                                                                                                                                                                                                               |
| 1553 | Q6FI81-3         | 4                    | 4              | 14.4                  | 299    | 32213 | 5.6  | Isoform 3 of Q6FI81                                                                                                                                                                                                         |
| 1553 | Q6FI81           | 4                    | 4              | 13.8                  | 312    | 33582 | 5.6  | Anamorsin                                                                                                                                                                                                                   |
| 1553 | UPI00000739FB    | 4                    | 4              | 11.7                  | 367    | 40003 | 5.8  | CPIN1_HUMAN Isoform 2 of Q6FI81 - Homo sapiens (Human)                                                                                                                                                                      |
| 1554 | UPI0000456DE4    | 4                    | 8              | 14.3                  | 280    | 32431 | 9.6  | 39S ribosomal protein L19, mitochondrial precursor (L19mt) (MRP-L19) (MRP-L15).                                                                                                                                             |
| 1554 | P49406           | 4                    | 8              | 13.7                  | 292    | 33535 | 9.5  | 39S ribosomal protein L19, mitochondrial precursor                                                                                                                                                                          |
| 1555 | Q2L696           | 4                    | 9              | 14.4                  | 390    | 46630 | 5.2  | Nucb2 splice variant                                                                                                                                                                                                        |
| 1555 | P80303           | 4                    | 9              | 13.3                  | 420    | 50223 | 5.1  | Nucleobindin-2 precursor                                                                                                                                                                                                    |
| 1555 | UPI00001AF3CE    | 4                    | 9              | 13.3                  | 420    | 50201 | 5.1  | Nucleobindin-2 precursor (DNA-binding protein NEFA) (Gastric cancer antigen Zg4).                                                                                                                                           |
| 1556 | Q07666-3         | 4                    | 24             | 14.6                  | 404    | 44027 | 7.3  | Isoform 3 of Q07666                                                                                                                                                                                                         |
| 1556 | Q07666           | 4                    | 24             | 13.3                  | 443    | 48227 | 8.7  | KH domain-containing, RNA-binding, signal transduction-associated protein 1                                                                                                                                                 |
| 1557 | Q13510           | 4                    | 50             | 13.2                  | 395    | 44650 | 7.6  | Acid ceramidase precursor (EC 3.5.1.23) (Acylsphingosine deacylase) (N-acylsphingosine amidohydrolase) (AC) (Putative 32 kDa heart protein) (PHP32) [Contains: Acid ceramidase subunit alpha; Acid ceramidase subunit beta] |
| 1557 | Q53H01           | 4                    | 50             | 13.2                  | 395    | 44692 | 7.6  | N-acylsphingosine amidohydrolase (Acid ceramidase) 1 preproprotein isoform a variant                                                                                                                                        |
| 1557 | UPI0000190976    | 4                    | 50             | 12.7                  | 411    | 46494 | 7.9  | N-acylsphingosine amidohydrolase (acid ceramidase) 1 isoform b                                                                                                                                                              |
| 1558 | P11172           | 4                    | 4              | 13.1                  | 480    | 52222 | 7.2  | Uridine 5'-monophosphate synthase (UMP synthase) [Includes: Orotate phosphoribosyltransferase (EC 2.4.2.10) (OPRTase); Orotidine 5'-phosphate decarboxylase (EC 4.1.1.23) (OMPdecase)]                                      |
| 1559 | Q9BVC6           | 4                    | 27             | 12.8                  | 243    | 26210 | 10.5 | Transmembrane protein 109 precursor                                                                                                                                                                                         |
| 1560 | Q9Y639           | 4                    | 13             | 12.8                  | 282    | 31291 | 6.9  | Neuroplastin precursor                                                                                                                                                                                                      |
| 1560 | Q9Y639-2         | 4                    | 13             | 9                     | 398    | 44387 | 8    | Isoform 2 of Q9Y639                                                                                                                                                                                                         |
| 1561 | UPI0000457335    | 4                    | 8              | 19.4                  | 304    | 32825 | 5.6  | proline-rich coiled-coil 1                                                                                                                                                                                                  |
| 1561 | Q8NEZ7           | 4                    | 8              | 19.3                  | 305    | 32896 | 5.6  | FLJ00410 protein                                                                                                                                                                                                            |

| No.  | Accession Number | Unique Peptide Count | Spectrum Count | Sequence Coverage (%) | Length | MolWt | pI  | Descriptive Name                                                                          |
|------|------------------|----------------------|----------------|-----------------------|--------|-------|-----|-------------------------------------------------------------------------------------------|
| 1561 | Q96M27           | 4                    | 8              | 13.3                  | 445    | 46701 | 5.8 | CDNA FLJ32875 fis, clone TESTI2004031                                                     |
| 1561 | Q8IVL4           | 4                    | 8              | 12.8                  | 462    | 48907 | 5.3 | Hypothetical protein                                                                      |
| 1561 | Q86Y42           | 4                    | 8              | 12.7                  | 464    | 48525 | 5.4 | Proline-rich coiled-coil protein 1                                                        |
| 1561 | UPI0000D61673    | 4                    | 8              | 12.7                  | 466    | 48637 | 5.5 | proline-rich coiled-coil 1                                                                |
| 1562 | Q9H0C8           | 4                    | 6              | 12.5                  | 392    | 42907 | 7.1 | Integrin-linked kinase-associated serine/threonine phosphatase 2C                         |
| 1563 | Q9HAB8           | 4                    | 6              | 12.5                  | 311    | 34005 | 6.7 | Phosphopantothenate--cysteine ligase                                                      |
| 1564 | Q9BUB1           | 4                    | 6              | 12.8                  | 382    | 43067 | 5.1 | PRKAR2A protein                                                                           |
| 1564 | P13861           | 4                    | 6              | 12.1                  | 404    | 45518 | 5.1 | cAMP-dependent protein kinase type II-alpha regulatory subunit                            |
| 1565 | Q0VDF9           | 4                    | 6              | 12                    | 509    | 54795 | 5.6 | Heat shock 70 kDa protein 14                                                              |
| 1565 | Q9UI07           | 4                    | 6              | 12                    | 509    | 54778 | 5.6 | Heat shock protein hsp70-related protein                                                  |
| 1565 | Q9P0X2           | 4                    | 6              | 12                    | 509    | 54824 | 5.5 | Heat shock protein HSP60                                                                  |
| 1566 | Q8N684-2         | 4                    | 10             | 12.1                  | 462    | 51096 | 7.8 | Isoform 2 of Q8N684                                                                       |
| 1566 | Q8N684           | 4                    | 10             | 11.9                  | 471    | 52050 | 8   | Cleavage and polyadenylation specificity factor 7                                         |
| 1567 | UPI0000D61B8E    | 4                    | 25             | 15.9                  | 258    | 28857 | 4.9 | Glycogenin-1 (EC 2.4.1.186).                                                              |
| 1567 | P46976-3         | 4                    | 25             | 15.8                  | 260    | 29057 | 4.9 | Isoform GN                                                                                |
| 1567 | Q8N5Y3           | 4                    | 25             | 12.4                  | 331    | 37246 | 5.4 | GYG1 protein                                                                              |
| 1567 | Q6FHZ1           | 4                    | 25             | 12.3                  | 333    | 37479 | 5.4 | GYG protein                                                                               |
| 1567 | P46976           | 4                    | 25             | 11.7                  | 350    | 39384 | 5.5 | Glycogenin-1                                                                              |
| 1568 | P82650           | 4                    | 5              | 11.7                  | 360    | 41280 | 7.9 | Mitochondrial 28S ribosomal protein S22                                                   |
| 1569 | UPI0000D62170    | 4                    | 10             | 13.9                  | 395    | 44603 | 5.6 | Ataxin-10 (Spinocerebellar ataxia type 10 protein) (Brain protein E46 homolog).           |
| 1569 | Q9UBB4           | 4                    | 10             | 11.6                  | 475    | 53489 | 5.2 | Ataxin-10                                                                                 |
| 1570 | UPI000014188D    | 4                    | 7              | 12.3                  | 439    | 46796 | 8.6 | UPI000014188D UniRef100 entry                                                             |
| 1570 | Q9UKX7           | 4                    | 7              | 11.5                  | 468    | 50144 | 7.1 | Nucleoporin 50 kDa                                                                        |
| 1571 | O75306           | 4                    | 5              | 11.2                  | 463    | 52546 | 7.6 | NADH dehydrogenase [ubiquinone] iron-sulfur protein 2, mitochondrial precursor            |
| 1571 | Q53HG2           | 4                    | 5              | 11.2                  | 463    | 52561 | 7.6 | NADH dehydrogenase (Ubiquinone) Fe-S protein 2, 49kDa (NADH-coenzyme Q reductase) variant |
| 1572 | P06865           | 4                    | 6              | 11.2                  | 529    | 60689 | 5.2 | Beta-hexosaminidase alpha chain precursor                                                 |
| 1572 | Q6AI32           | 4                    | 6              | 11.2                  | 529    | 60719 | 5.1 | Hypothetical protein DKFZp781C13106                                                       |
| 1572 | Q53HS8           | 4                    | 6              | 11.2                  | 529    | 60699 | 5.2 | Hexosaminidase A preproprotein variant                                                    |
| 1573 | Q9BR76           | 4                    | 7              | 11.2                  | 489    | 54235 | 5.9 | Coronin-1B                                                                                |
| 1574 | UPI0000071403    | 4                    | 9              | 11.4                  | 537    | 60540 | 8.8 | guanine nucleotide binding protein-like 3 isoform 2                                       |
| 1574 | Q5PU80           | 4                    | 9              | 11.1                  | 549    | 61957 | 9.1 | Nucleostemin                                                                              |
| 1574 | UPI000003C48A    | 4                    | 9              | 11.1                  | 549    | 61993 | 9.2 | guanine nucleotide binding protein-like 3 isoform 1                                       |
| 1574 | Q9BVP2           | 4                    | 9              | 11.1                  | 549    | 61997 | 9.1 | Guanine nucleotide-binding protein-like 3                                                 |



| No.  | Accession Number | Unique Peptide Count | Spectrum Count | Sequence Coverage (%) | Length | MolWt | pI  | Descriptive Name                                                                                                                                                                                                  |
|------|------------------|----------------------|----------------|-----------------------|--------|-------|-----|-------------------------------------------------------------------------------------------------------------------------------------------------------------------------------------------------------------------|
| 1575 | UPI0000D625AE    | 4                    | 17             | 11.2                  | 555    | 60357 | 6.4 | Tripeptidyl-peptidase 1 precursor (EC 3.4.14.9) (Tripeptidyl-peptidase I) (TPP-1) (TPP-I) (Tripeptidyl aminopeptidase) (Lysosomal pepstatin insensitive protease) (LPIC) (Cell growth-inhibiting gene 1 protein). |
| 1575 | O14773-3         | 4                    | 17             | 11.2                  | 556    | 60458 | 6.4 | Isoform 3 of O14773                                                                                                                                                                                               |
| 1575 | O14773           | 4                    | 17             | 11                    | 563    | 61248 | 6.5 | Tripeptidyl-peptidase 1 precursor                                                                                                                                                                                 |
| 1575 | Q53HP2           | 4                    | 17             | 11                    | 563    | 61213 | 6.5 | Tripeptidyl-peptidase I variant                                                                                                                                                                                   |
| 1576 | P36957           | 4                    | 18             | 11                    | 453    | 48640 | 8.8 | Dihydrolipoyllysine-residue succinyltransferase component of 2- oxoglutarate dehydrogenase complex, mitochondrial precursor                                                                                       |
| 1576 | Q7LDY7           | 4                    | 18             | 11                    | 453    | 48755 | 9   | Alpha-KG-E2                                                                                                                                                                                                       |
| 1577 | Q99541           | 4                    | 7              | 11                    | 437    | 48075 | 6.8 | Adipophilin                                                                                                                                                                                                       |
| 1578 | Q9H9J5           | 4                    | 8              | 10.9                  | 521    | 59844 | 6   | CDNA FLJ12694 fis, clone NT2RP1000358, highly similar to Homo sapiens mRNA; cDNA DKFZp564C186                                                                                                                     |
| 1578 | UPI000041820C    | 4                    | 8              | 7.6                   | 749    | 84919 | 5.6 | Nucleolar complex protein 2 homolog (Protein NOC2 homolog) (NOC2- like).                                                                                                                                          |
| 1578 | UPI0000161C39    | 4                    | 8              | 7.6                   | 749    | 84878 | 5.5 | nucleolar complex associated 2 homolog                                                                                                                                                                            |
| 1578 | Q9Y3T9           | 4                    | 8              | 7.6                   | 749    | 84905 | 5.6 | Nucleolar complex protein 2 homolog                                                                                                                                                                               |
| 1579 | Q6ZP32           | 4                    | 12             | 10.7                  | 448    | 52953 | 7.9 | CDNA FLJ26613 fis, clone MPB05565, highly similar to Serine/threonine protein phosphatase 2A, 55 kDa regulatory subunit B, alpha isoform                                                                          |
| 1579 | UPI0000D624A2    | 4                    | 12             | 10.7                  | 448    | 52925 | 7.9 | Dedicator of cytokinesis protein 5.                                                                                                                                                                               |
| 1580 | Q59FQ9           | 4                    | 7              | 16.3                  | 313    | 35616 | 7.9 | DDX19-like protein variant                                                                                                                                                                                        |
| 1580 | Q68DY7           | 4                    | 7              | 15.5                  | 328    | 37429 | 7.6 | Hypothetical protein DKFZp686C21137                                                                                                                                                                               |
| 1580 | Q69YM2           | 4                    | 7              | 14.2                  | 360    | 40711 | 7.3 | Hypothetical protein DKFZp762C1313                                                                                                                                                                                |
| 1580 | Q96KE7           | 4                    | 7              | 13.8                  | 370    | 41779 | 7.9 | Testicular DEAD-box helicase protein (DEAD (Asp-Glu-Ala-As) box polypeptide 19B)                                                                                                                                  |
| 1580 | Q9UMR2-2         | 4                    | 7              | 11.4                  | 448    | 50490 | 6.1 | Isoform 2 of Q9UMR2                                                                                                                                                                                               |
| 1580 | Q9NUU7           | 4                    | 7              | 10.7                  | 478    | 53975 | 6.6 | ATP-dependent RNA helicase DDX19A                                                                                                                                                                                 |
| 1580 | Q53G16           | 4                    | 7              | 10.6                  | 479    | 53914 | 6.5 | DEAD (Asp-Glu-Ala-As) box polypeptide 19 variant                                                                                                                                                                  |
| 1580 | Q9UMR2           | 4                    | 7              | 10.6                  | 479    | 53927 | 6.3 | ATP-dependent RNA helicase DDX19B                                                                                                                                                                                 |
| 1581 | Q8WUX9           | 4                    | 9              | 10.6                  | 453    | 50911 | 5.3 | Protein CHMP7                                                                                                                                                                                                     |
| 1582 | P43897           | 4                    | 7              | 10.5                  | 325    | 35391 | 8.4 | Elongation factor Ts, mitochondrial precursor                                                                                                                                                                     |
| 1583 | Q13867           | 4                    | 4              | 10.5                  | 455    | 52562 | 6.3 | Bleomycin hydrolase                                                                                                                                                                                               |

| No.  | Accession Number | Unique Peptide Count | Spectrum Count | Sequence Coverage (%) | Length | MolWt  | pI  | Descriptive Name                                                                                                                                                                                                                                                                                                                                                                                                                                |
|------|------------------|----------------------|----------------|-----------------------|--------|--------|-----|-------------------------------------------------------------------------------------------------------------------------------------------------------------------------------------------------------------------------------------------------------------------------------------------------------------------------------------------------------------------------------------------------------------------------------------------------|
| 1584 | O43252           | 4                    | 8              | 10.4                  | 624    | 70833  | 6.9 | Bifunctional 3'-phosphoadenosine 5'-phosphosulfate synthetase 1 (PAPS synthetase 1) (PAPSS 1) (Sulfurylase kinase 1) (SK1) (SK 1) [Includes: Sulfate adenyltransferase (EC 2.7.7.4) (Sulfate adenylate transferase) (SAT) (ATP-sulfurylase); Adenylyl-sulfate kinase (EC 2.7.1.25) (Adenylylsulfate 3'-phosphotransferase) (APS kinase) (Adenosine-5'-phosphosulfate 3'-phosphotransferase) (3'-phosphoadenosine-5'-phosphosulfate synthetase)] |
| 1585 | Q9UN86-2         | 4                    | 22             | 11.1                  | 449    | 50817  | 5.4 | Isoform B of Q9UN86                                                                                                                                                                                                                                                                                                                                                                                                                             |
| 1585 | Q9UN86           | 4                    | 22             | 10.4                  | 482    | 54121  | 5.6 | Ras GTPase-activating protein-binding protein 2                                                                                                                                                                                                                                                                                                                                                                                                 |
| 1586 | Q13619           | 4                    | 7              | 10.3                  | 759    | 87680  | 8.1 | Cullin-4A                                                                                                                                                                                                                                                                                                                                                                                                                                       |
| 1586 | UPI0000D61AB1    | 4                    | 7              | 10.2                  | 763    | 88235  | 8.1 | Cullin-4A (CUL-4A).                                                                                                                                                                                                                                                                                                                                                                                                                             |
| 1587 | Q15629           | 4                    | 20             | 10.2                  | 374    | 43072  | 9.6 | Translocation-associated membrane protein 1                                                                                                                                                                                                                                                                                                                                                                                                     |
| 1588 | Q15437           | 4                    | 6              | 10                    | 767    | 86479  | 6.9 | Protein transport protein Sec23B                                                                                                                                                                                                                                                                                                                                                                                                                |
| 1588 | Q503A9           | 4                    | 6              | 10                    | 767    | 86495  | 6.9 | Sec23 homolog B                                                                                                                                                                                                                                                                                                                                                                                                                                 |
| 1589 | P48637           | 4                    | 4              | 9.7                   | 474    | 52385  | 5.9 | Glutathione synthetase                                                                                                                                                                                                                                                                                                                                                                                                                          |
| 1590 | UPI000014FCE3    | 4                    | 8              | 12.4                  | 508    | 57508  | 8.8 | KIAA0020 (KIAA0020), mRNA                                                                                                                                                                                                                                                                                                                                                                                                                       |
| 1590 | Q15397           | 4                    | 8              | 9.7                   | 648    | 73584  | 9.6 | Protein KIAA0020                                                                                                                                                                                                                                                                                                                                                                                                                                |
| 1591 | Q8TB21           | 4                    | 9              | 9.7                   | 667    | 73533  | 9   | Stimulated by retinoic acid gene 6 homolog                                                                                                                                                                                                                                                                                                                                                                                                      |
| 1591 | Q9BX79           | 4                    | 9              | 9.7                   | 667    | 73503  | 9   | STRA6 isoform 1                                                                                                                                                                                                                                                                                                                                                                                                                                 |
| 1592 | Q5T2T8           | 4                    | 5              | 18.6                  | 204    | 22890  | 7.3 | Prion protein interacting protein                                                                                                                                                                                                                                                                                                                                                                                                               |
| 1592 | Q5TG35           | 4                    | 5              | 17.1                  | 222    | 25009  | 6.5 | Prion protein interacting protein                                                                                                                                                                                                                                                                                                                                                                                                               |
| 1592 | UPI0000D4E859    | 4                    | 5              | 10.4                  | 365    | 40077  | 8   | prion protein interacting protein                                                                                                                                                                                                                                                                                                                                                                                                               |
| 1592 | O43414           | 4                    | 5              | 9.6                   | 397    | 43076  | 8.7 | Prion protein-interacting protein                                                                                                                                                                                                                                                                                                                                                                                                               |
| 1593 | Q9UNH7           | 4                    | 6              | 9.6                   | 406    | 46649  | 6.2 | Sorting nexin-6                                                                                                                                                                                                                                                                                                                                                                                                                                 |
| 1594 | O14929           | 4                    | 6              | 9.5                   | 419    | 49513  | 5.7 | Histone acetyltransferase type B catalytic subunit                                                                                                                                                                                                                                                                                                                                                                                              |
| 1595 | Q05BU5           | 4                    | 8              | 9.5                   | 461    | 52106  | 9.7 | Hypothetical protein                                                                                                                                                                                                                                                                                                                                                                                                                            |
| 1595 | UPI0000D61501    | 4                    | 8              | 3.5                   | 1273   | 140703 | 8.3 | Putative RNA-binding protein 16 (RNA-binding motif protein 16).                                                                                                                                                                                                                                                                                                                                                                                 |
| 1595 | Q9UPN6           | 4                    | 8              | 3.5                   | 1271   | 140519 | 8.3 | Putative RNA-binding protein 16                                                                                                                                                                                                                                                                                                                                                                                                                 |
| 1595 | Q6NSK3           | 4                    | 8              | 3.5                   | 1271   | 140518 | 8.3 | RBM16 protein                                                                                                                                                                                                                                                                                                                                                                                                                                   |
| 1596 | Q9HB40           | 4                    | 12             | 9.5                   | 452    | 50831  | 5.8 | Retinoid-inducible serine carboxypeptidase precursor                                                                                                                                                                                                                                                                                                                                                                                            |
| 1597 | A4D118           | 4                    | 18             | 9.4                   | 561    | 64400  | 6.8 | Asparagine synthetase                                                                                                                                                                                                                                                                                                                                                                                                                           |
| 1597 | P08243           | 4                    | 18             | 9.4                   | 561    | 64370  | 6.9 | Asparagine synthetase [glutamine-hydrolyzing]                                                                                                                                                                                                                                                                                                                                                                                                   |
| 1598 | P48147           | 4                    | 5              | 9.4                   | 710    | 80764  | 5.8 | Prolyl endopeptidase                                                                                                                                                                                                                                                                                                                                                                                                                            |
| 1598 | Q9UM02           | 4                    | 5              | 9.4                   | 710    | 80734  | 5.9 | Prolyl endopeptidase                                                                                                                                                                                                                                                                                                                                                                                                                            |
| 1598 | Q8N6D4           | 4                    | 5              | 9.4                   | 710    | 80700  | 5.9 | Prolyl endopeptidase                                                                                                                                                                                                                                                                                                                                                                                                                            |
| 1599 | P13473           | 4                    | 104            | 9.3                   | 410    | 44961  | 5.6 | Lysosome-associated membrane glycoprotein 2 precursor                                                                                                                                                                                                                                                                                                                                                                                           |
| 1599 | Q9UD93           | 4                    | 104            | 9.3                   | 410    | 45043  | 5.9 | Lysosomal membrane glycoprotein LAMP-2 homolog                                                                                                                                                                                                                                                                                                                                                                                                  |
| 1599 | P13473-2         | 4                    | 104            | 9.3                   | 410    | 44956  | 5.7 | Isoform LAMP                                                                                                                                                                                                                                                                                                                                                                                                                                    |
| 1599 | Q6Q3G8           | 4                    | 104            | 9.2                   | 411    | 45170  | 5.9 | Lysosomal-associated membrane protein 2C                                                                                                                                                                                                                                                                                                                                                                                                        |

| No.  | Accession Number | Unique Peptide Count | Spectrum Count | Sequence Coverage (%) | Length | MolWt | pI  | Descriptive Name                                                                              |
|------|------------------|----------------------|----------------|-----------------------|--------|-------|-----|-----------------------------------------------------------------------------------------------|
| 1600 | Q2Z2K8           | 4                    | 7              | 9.3                   | 754    | 85562 | 5.8 | Endothelin-converting enzyme-1c                                                               |
| 1600 | P42892-2         | 4                    | 7              | 9.2                   | 758    | 85808 | 6.5 | Isoform A of P42892                                                                           |
| 1600 | P42892           | 4                    | 7              | 9.1                   | 770    | 87164 | 5.9 | Endothelin-converting enzyme 1                                                                |
| 1600 | P42892-4         | 4                    | 7              | 9.1                   | 767    | 87023 | 5.8 | Isoform D of P42892                                                                           |
| 1601 | Q8N2N3           | 4                    | 12             | 16.9                  | 243    | 27824 | 7.8 | CDNA FLJ90102 fis, clone HEMBA1006299, highly similar to Putative NFkB activating protein 373 |
| 1601 | Q5JRS7           | 4                    | 12             | 9.1                   | 450    | 51571 | 7.3 | G protein-coupled receptor 177                                                                |
| 1601 | Q5T9L3-2         | 4                    | 12             | 7.6                   | 543    | 62552 | 7.6 | Isoform 2 of Q5T9L3                                                                           |
| 1601 | Q5T9L3           | 4                    | 12             | 7.6                   | 541    | 62253 | 7.4 | Integral membrane protein GPR177 precursor                                                    |
| 1601 | Q8N108-9         | 4                    | 12             | 5.8                   | 710    | 81719 | 4.7 | Isoform 9 of Q8N108                                                                           |
| 1602 | O00400           | 4                    | 16             | 8.9                   | 549    | 60909 | 7.3 | Acetyl-coenzyme A transporter 1                                                               |
| 1603 | Q5BKZ1           | 4                    | 5              | 8.9                   | 582    | 65654 | 5.2 | Zinc finger protein 326                                                                       |
| 1604 | Q9NQW7-2         | 4                    | 15             | 9.2                   | 599    | 67227 | 5.8 | Isoform 2 of Q9NQW7                                                                           |
| 1604 | Q9NQW7           | 4                    | 15             | 8.8                   | 623    | 69918 | 5.7 | Xaa-Pro aminopeptidase 1                                                                      |
| 1605 | P49821-2         | 4                    | 8              | 8.8                   | 455    | 49868 | 8.2 | Isoform 2 of P49821                                                                           |
| 1605 | P49821           | 4                    | 8              | 8.6                   | 464    | 50817 | 8.2 | NADH dehydrogenase [ubiquinone] flavoprotein 1, mitochondrial precursor                       |
| 1605 | Q53G70           | 4                    | 8              | 8.6                   | 464    | 50801 | 8.2 | NADH dehydrogenase (Ubiquinone) flavoprotein 1, 51kDa variant                                 |
| 1606 | Q9HAB1           | 4                    | 12             | 9.4                   | 438    | 47170 | 6.8 | CDNA FLJ11863 fis, clone HEMBA1006926                                                         |
| 1606 | UPI000045716A    | 4                    | 12             | 9.3                   | 439    | 47299 | 6.8 | solute carrier family 41, member 3 isoform 4                                                  |
| 1606 | Q8NB27           | 4                    | 12             | 8.6                   | 478    | 51507 | 7.2 | CDNA FLJ34352 fis, clone FEBRA2011593                                                         |
| 1606 | UPI00003D2133    | 4                    | 12             | 8.4                   | 487    | 52449 | 6.9 | solute carrier family 41, member 3 isoform 2                                                  |
| 1606 | UPI00001AF113    | 4                    | 12             | 8.3                   | 496    | 53923 | 7.2 | solute carrier family 41, member 3 isoform 4                                                  |
| 1606 | UPI000013D523    | 4                    | 12             | 8.1                   | 507    | 54767 | 7.8 | solute carrier family 41, member 3 isoform 4                                                  |
| 1606 | Q96GZ6           | 4                    | 12             | 8.1                   | 507    | 54737 | 7.8 | Solute carrier family 41 member 3                                                             |
| 1607 | Q6FIA3           | 4                    | 12             | 8.5                   | 445    | 51353 | 5.4 | PACSIN2 protein                                                                               |
| 1607 | UPI000003EE3B    | 4                    | 12             | 7.8                   | 486    | 55905 | 5.2 | protein kinase C and casein kinase substrate in neurons 2                                     |
| 1607 | Q9UNF0           | 4                    | 12             | 7.8                   | 486    | 55739 | 5.2 | Protein kinase C and casein kinase substrate in neurons protein 2                             |
| 1608 | Q8TED0           | 4                    | 5              | 8.5                   | 518    | 58355 | 9.1 | U3 small nucleolar RNA-associated protein 15 homolog                                          |
| 1608 | UPI000020CADC    | 4                    | 5              | 8.5                   | 518    | 58415 | 9.1 | UTP15, U3 small nucleolar ribonucleoprotein, homolog                                          |
| 1609 | Q969Y5           | 4                    | 14             | 8.5                   | 635    | 68642 | 8.3 | Solute carrier family 5 (Sodium-dependent vitamin transporter), member 6                      |
| 1609 | Q9Y289           | 4                    | 14             | 8.5                   | 635    | 68702 | 8.3 | Sodium-dependent multivitamin transporter (Na(+)-dependent multivitamin transporter)          |
| 1610 | Q96CP5           | 4                    | 9              | 8.5                   | 480    | 53509 | 6.7 | PMPCB protein                                                                                 |
| 1610 | O75439           | 4                    | 9              | 8.4                   | 489    | 54366 | 6.8 | Mitochondrial-processing peptidase subunit beta, mitochondrial precursor                      |

| No.  | Accession Number | Unique Peptide Count | Spectrum Count | Sequence Coverage (%) | Length | MolWt | pI  | Descriptive Name                                                                                                                                                                      |
|------|------------------|----------------------|----------------|-----------------------|--------|-------|-----|---------------------------------------------------------------------------------------------------------------------------------------------------------------------------------------|
| 1610 | UPI0000D61CA8    | 4                    | 9              | 8.4                   | 491    | 54524 | 6.8 | Mitochondrial-processing peptidase subunit beta, mitochondrial precursor (EC 3.4.24.64) (Beta-MPP) (P-52).                                                                            |
| 1611 | Q14161-11        | 4                    | 8              | 10                    | 631    | 70183 | 6.6 | Isoform 11 of Q14161                                                                                                                                                                  |
| 1611 | UPI0000D6224B    | 4                    | 8              | 9.8                   | 646    | 71956 | 6.6 | ARF GTPase-activating protein GIT2 (G protein-coupled receptor kinase- interactor 2) (GRK-interacting protein 2) (Cool-interacting tyrosine-phosphorylated protein 2) (CAT2) (CAT-2). |
| 1611 | Q14161-7         | 4                    | 8              | 9.8                   | 646    | 71967 | 6.7 | Isoform 7 of Q14161                                                                                                                                                                   |
| 1611 | UPI0000D6224A    | 4                    | 8              | 9.5                   | 661    | 73392 | 6.7 | ARF GTPase-activating protein GIT2 (G protein-coupled receptor kinase- interactor 2) (GRK-interacting protein 2) (Cool-interacting tyrosine-phosphorylated protein 2) (CAT2) (CAT-2). |
| 1611 | Q14161-6         | 4                    | 8              | 9.5                   | 661    | 73403 | 6.7 | Isoform 6 of Q14161                                                                                                                                                                   |
| 1611 | UPI0000D62249    | 4                    | 8              | 9.3                   | 681    | 76061 | 7.3 | ARF GTPase-activating protein GIT2 (G protein-coupled receptor kinase- interactor 2) (GRK-interacting protein 2) (Cool-interacting tyrosine-phosphorylated protein 2) (CAT2) (CAT-2). |
| 1611 | UPI0000167B56    | 4                    | 8              | 9.3                   | 679    | 75734 | 7.2 | G protein-coupled receptor kinase-interactor 2 isoform 3                                                                                                                              |
| 1611 | Q14161-10        | 4                    | 8              | 9.3                   | 681    | 76072 | 7.5 | Isoform 10 of Q14161                                                                                                                                                                  |
| 1611 | Q14161-8         | 4                    | 8              | 9.1                   | 694    | 77518 | 7.3 | Isoform 8 of Q14161                                                                                                                                                                   |
| 1611 | UPI0000D62248    | 4                    | 8              | 8.9                   | 709    | 78943 | 7.3 | ARF GTPase-activating protein GIT2 (G protein-coupled receptor kinase- interactor 2) (GRK-interacting protein 2) (Cool-interacting tyrosine-phosphorylated protein 2) (CAT2) (CAT-2). |
| 1611 | Q14161-4         | 4                    | 8              | 8.9                   | 709    | 78954 | 7.5 | Isoform 4 of Q14161                                                                                                                                                                   |
| 1611 | UPI0000D62247    | 4                    | 8              | 8.6                   | 729    | 81311 | 6.9 | ARF GTPase-activating protein GIT2 (G protein-coupled receptor kinase- interactor 2) (GRK-interacting protein 2) (Cool-interacting tyrosine-phosphorylated protein 2) (CAT2) (CAT-2). |
| 1611 | Q14161-5         | 4                    | 8              | 8.6                   | 729    | 81322 | 7   | Isoform 5 of Q14161                                                                                                                                                                   |
| 1611 | Q14161-3         | 4                    | 8              | 8.5                   | 744    | 82759 | 7.1 | Isoform 3 of Q14161                                                                                                                                                                   |
| 1611 | Q14161           | 4                    | 8              | 8.3                   | 759    | 84543 | 7.2 | ARF GTPase-activating protein GIT2                                                                                                                                                    |
| 1611 | UPI0000D62246    | 4                    | 8              | 8.3                   | 759    | 84532 | 7.1 | ARF GTPase-activating protein GIT2 (G protein-coupled receptor kinase- interactor 2) (GRK-interacting protein 2) (Cool-interacting tyrosine-phosphorylated protein 2) (CAT2) (CAT-2). |
| 1612 | Q2TAY7           | 4                    | 8              | 8.2                   | 513    | 57544 | 7.2 | Smu-1 suppressor of mec-8 and unc-52 protein homolog                                                                                                                                  |
| 1613 | Q92544           | 4                    | 11             | 8.2                   | 625    | 72541 | 6.7 | Transmembrane 9 superfamily protein member 4                                                                                                                                          |
| 1614 | Q9H8H0           | 4                    | 4              | 8.1                   | 719    | 81124 | 6.1 | Nucleolar protein 11                                                                                                                                                                  |

| No.  | Accession Number | Unique Peptide Count | Spectrum Count | Sequence Coverage (%) | Length | MolWt | pI  | Descriptive Name                                                                                                                                                                                                 |
|------|------------------|----------------------|----------------|-----------------------|--------|-------|-----|------------------------------------------------------------------------------------------------------------------------------------------------------------------------------------------------------------------|
| 1615 | UPI0000366EEE    | 4                    | 19             | 8.6                   | 510    | 57391 | 8   | Interferon-induced, double-stranded RNA-activated protein kinase (EC 2.7.11.1) (Interferon-inducible RNA-dependent protein kinase) (Protein kinase RNA-activated) (PKR) (p68 kinase) (P1/eIF-2A protein kinase). |
| 1615 | Q8IW76           | 4                    | 19             | 8.6                   | 513    | 57620 | 8.3 | EIF2AK2 protein                                                                                                                                                                                                  |
| 1615 | Q7Z6F6           | 4                    | 19             | 8.6                   | 510    | 57478 | 8.2 | Interferon-inducible double-stranded RNA-dependent protein kinase                                                                                                                                                |
| 1615 | P19525           | 4                    | 19             | 8                     | 551    | 62094 | 8.4 | Interferon-induced, double-stranded RNA-activated protein kinase                                                                                                                                                 |
| 1616 | O75475           | 4                    | 6              | 7.9                   | 530    | 60103 | 9.1 | PC4 and SFRS1-interacting protein                                                                                                                                                                                |
| 1617 | Q9UG63           | 4                    | 13             | 7.9                   | 623    | 71290 | 7.4 | ATP-binding cassette sub-family F member 2                                                                                                                                                                       |
| 1618 | Q14554           | 4                    | 6              | 7.7                   | 519    | 59594 | 7.9 | Protein disulfide-isomerase A5 precursor                                                                                                                                                                         |
| 1619 | Q9H074-2         | 4                    | 5              | 9.2                   | 400    | 45631 | 4.5 | Isoform 2 of Q9H074                                                                                                                                                                                              |
| 1619 | Q9H074           | 4                    | 5              | 7.7                   | 479    | 53525 | 4.8 | Polyadenylate-binding protein-interacting protein 1 (Poly(A)-binding protein-interacting protein 1)                                                                                                              |
| 1620 | O95817           | 4                    | 5              | 7.5                   | 575    | 61595 | 7   | BAG family molecular chaperone regulator 3                                                                                                                                                                       |
| 1620 | Q53GY1           | 4                    | 5              | 7.5                   | 575    | 61604 | 7.4 | BCL2-associated athanogene 3 variant                                                                                                                                                                             |
| 1621 | Q53GW1           | 4                    | 5              | 7.5                   | 642    | 72308 | 6.4 | Vesicle transport-related protein isoform a variant                                                                                                                                                              |
| 1621 | Q8WVM8           | 4                    | 5              | 7.5                   | 642    | 72380 | 6.3 | Sec1 family domain-containing protein 1                                                                                                                                                                          |
| 1622 | O43395           | 4                    | 10             | 7.3                   | 683    | 77529 | 9.5 | U4/U6 small nuclear ribonucleoprotein Prp3                                                                                                                                                                       |
| 1622 | Q53GV6           | 4                    | 10             | 7.3                   | 683    | 77441 | 9.5 | PRP3 pre-mRNA processing factor 3 homolog                                                                                                                                                                        |
| 1622 | O43395-2         | 4                    | 10             | 7.3                   | 682    | 77472 | 9.5 | Isoform 2 of O43395                                                                                                                                                                                              |
| 1623 | O94776           | 4                    | 5              | 7.3                   | 668    | 75023 | 9.7 | Metastasis-associated protein MTA2                                                                                                                                                                               |
| 1624 | P51812           | 4                    | 6              | 7.3                   | 740    | 83736 | 6.9 | Ribosomal protein S6 kinase alpha-3                                                                                                                                                                              |
| 1625 | O94874           | 4                    | 10             | 7.2                   | 794    | 89595 | 6.8 | Uncharacterized protein KIAA0776                                                                                                                                                                                 |
| 1626 | P16435           | 4                    | 8              | 7.2                   | 677    | 76690 | 5.6 | NADPH--cytochrome P450 reductase                                                                                                                                                                                 |
| 1626 | Q63HL4           | 4                    | 8              | 7.2                   | 680    | 77018 | 5.6 | Hypothetical protein DKFZp686G04235                                                                                                                                                                              |
| 1627 | P50281           | 4                    | 5              | 7.2                   | 582    | 65884 | 7.8 | Matrix metalloproteinase-14 precursor                                                                                                                                                                            |
| 1627 | UPI0000048136    | 4                    | 5              | 7.2                   | 582    | 65894 | 7.8 | matrix metalloproteinase 14 preproprotein                                                                                                                                                                        |
| 1628 | Q6P1M0           | 4                    | 11             | 7.2                   | 643    | 72064 | 8.5 | Long-chain fatty acid transport protein 4                                                                                                                                                                        |
| 1629 | Q9NZW5           | 4                    | 5              | 7.2                   | 540    | 61117 | 6.2 | MAGUK p55 subfamily member 6                                                                                                                                                                                     |
| 1630 | Q9NVH1-3         | 4                    | 5              | 7.7                   | 507    | 57197 | 7.5 | Isoform 3 of Q9NVH1                                                                                                                                                                                              |
| 1630 | UPI0000D61E3A    | 4                    | 5              | 7.5                   | 523    | 59173 | 7.6 | DnaJ homolog subfamily C member 11.                                                                                                                                                                              |
| 1630 | Q9NVH1-2         | 4                    | 5              | 7.5                   | 521    | 58947 | 7.6 | Isoform 2 of Q9NVH1                                                                                                                                                                                              |
| 1630 | Q9NVH1           | 4                    | 5              | 7                     | 559    | 63278 | 8.4 | DnaJ homolog subfamily C member 11                                                                                                                                                                               |

| No.  | Accession Number | Unique Peptide Count | Spectrum Count | Sequence Coverage (%) | Length | MolWt  | pI   | Descriptive Name                                                                                                                                          |
|------|------------------|----------------------|----------------|-----------------------|--------|--------|------|-----------------------------------------------------------------------------------------------------------------------------------------------------------|
| 1630 | UPI000006D6B2    | 4                    | 5              | 7                     | 559    | 63336  | 8.4  | DnaJ (Hsp40) homolog, subfamily C, member 11                                                                                                              |
| 1631 | UPI000020A59A    | 4                    | 15             | 7                     | 660    | 76329  | 7.4  | hypothetical protein LOC55129                                                                                                                             |
| 1632 | A4D1C5           | 4                    | 16             | 6.9                   | 780    | 88106  | 5.6  | Protein tyrosine phosphatase, non-receptor type 12                                                                                                        |
| 1632 | Q05209           | 4                    | 16             | 6.9                   | 780    | 88120  | 5.6  | Tyrosine-protein phosphatase non-receptor type 12                                                                                                         |
| 1633 | Q6DCA8           | 4                    | 11             | 6.9                   | 680    | 77948  | 10.2 | BCLAF1 protein                                                                                                                                            |
| 1633 | Q9NYF8-4         | 4                    | 11             | 6.3                   | 747    | 85937  | 10.4 | Isoform 4 of Q9NYF8                                                                                                                                       |
| 1633 | UPI00004574B1    | 4                    | 11             | 5.4                   | 869    | 100202 | 10   | Bcl-2-associated transcription factor 1 (Btf).                                                                                                            |
| 1633 | Q9NYF8-3         | 4                    | 11             | 5.4                   | 869    | 100232 | 10   | Isoform 3 of Q9NYF8                                                                                                                                       |
| 1633 | Q9NYF8-2         | 4                    | 11             | 5.1                   | 918    | 105948 | 10   | Isoform 2 of Q9NYF8                                                                                                                                       |
| 1633 | Q9NYF8           | 4                    | 11             | 5.1                   | 920    | 106122 | 10   | Bcl-2-associated transcription factor 1                                                                                                                   |
| 1634 | P13798           | 4                    | 8              | 6.8                   | 732    | 81225  | 5.5  | Acylamino-acid-releasing enzyme                                                                                                                           |
| 1635 | Q15003           | 4                    | 11             | 6.7                   | 741    | 82563  | 5.1  | Condensin complex subunit 2                                                                                                                               |
| 1636 | Q86SZ6           | 4                    | 17             | 8.2                   | 489    | 55251  | 7.1  | Full-length cDNA clone CS0DJ012YD11 of T cells (Jurkat cell line) of Homo sapiens                                                                         |
| 1636 | O15321           | 4                    | 17             | 6.6                   | 606    | 68861  | 7.2  | Transmembrane 9 superfamily protein member 1 precursor                                                                                                    |
| 1637 | P40222           | 4                    | 4              | 6.6                   | 546    | 61891  | 6.5  | Alpha-taxilin                                                                                                                                             |
| 1638 | UPI0000DA4C59    | 4                    | 7              | 6.9                   | 750    | 80265  | 5.1  | calpastatin isoform f                                                                                                                                     |
| 1638 | UPI0000DA4C58    | 4                    | 7              | 6.9                   | 756    | 81169  | 5.2  | calpastatin isoform e                                                                                                                                     |
| 1638 | UPI0000DA4C5B    | 4                    | 7              | 6.8                   | 769    | 82437  | 5.2  | calpastatin isoform h                                                                                                                                     |
| 1638 | UPI0000DA4C5A    | 4                    | 7              | 6.7                   | 772    | 82771  | 5.3  | calpastatin isoform g                                                                                                                                     |
| 1638 | Q59HE3           | 4                    | 7              | 6.6                   | 784    | 84228  | 5.3  | Calpastatin isoform a variant                                                                                                                             |
| 1639 | P98194-2         | 4                    | 9              | 6.8                   | 888    | 96960  | 6.3  | Isoform 2 of P98194                                                                                                                                       |
| 1639 | P98194-4         | 4                    | 9              | 6.6                   | 903    | 98733  | 6.6  | Isoform 4 of P98194                                                                                                                                       |
| 1639 | P98194           | 4                    | 9              | 6.5                   | 919    | 100577 | 6.7  | Calcium-transporting ATPase type 2C member 1 (EC 3.6.3.8) (ATPase 2C1) (ATP-dependent Ca(2+) pump PMR1)                                                   |
| 1639 | P98194-3         | 4                    | 9              | 6.5                   | 923    | 101163 | 6.4  | Isoform 3 of P98194                                                                                                                                       |
| 1639 | P98194-5         | 4                    | 9              | 6.4                   | 939    | 103007 | 6.5  | Isoform 5 of P98194                                                                                                                                       |
| 1639 | UPI00001969A3    | 4                    | 9              | 6.3                   | 949    | 104032 | 6.4  | calcium-transporting ATPase 2C1 isoform 1d                                                                                                                |
| 1639 | P98194-6         | 4                    | 9              | 6.3                   | 959    | 105057 | 6.3  | Isoform 6 of P98194                                                                                                                                       |
| 1639 | UPI0000D61B7A    | 4                    | 9              | 6.2                   | 960    | 105298 | 6.1  | Calcium-transporting ATPase type 2C member 1 (EC 3.6.3.8) (ATPase 2C1) (ATP-dependent Ca(2+) pump PMR1).                                                  |
| 1640 | Q9Y5S1           | 4                    | 13             | 6.5                   | 764    | 85981  | 5.8  | Transient receptor potential cation channel subfamily V member 2                                                                                          |
| 1640 | UPI0000D622C9    | 4                    | 13             | 6.5                   | 766    | 86151  | 5.9  | Transient receptor potential cation channel subfamily V member 2 (TrpV2) (osm-9-like TRP channel 2) (OTRPC2) (Vanilloid receptor-like protein 1) (VRL-1). |
| 1641 | Q2TU89           | 4                    | 19             | 8                     | 701    | 79614  | 6.7  | Aging-associated protein 1                                                                                                                                |
| 1641 | Q2NKW9           | 4                    | 19             | 6.4                   | 869    | 98150  | 7    | Eukaryotic translation initiation factor 4 gamma, 2                                                                                                       |
| 1641 | P78344           | 4                    | 19             | 6.2                   | 907    | 102362 | 7.1  | Eukaryotic translation initiation factor 4 gamma 2                                                                                                        |

| No.  | Accession Number | Unique Peptide Count | Spectrum Count | Sequence Coverage (%) | Length | MolWt  | pI   | Descriptive Name                                                                                                                                                                                                                                                                                                                                    |
|------|------------------|----------------------|----------------|-----------------------|--------|--------|------|-----------------------------------------------------------------------------------------------------------------------------------------------------------------------------------------------------------------------------------------------------------------------------------------------------------------------------------------------------|
| 1641 | UPI000013C8BE    | 4                    | 19             | 6.2                   | 907    | 102330 | 7.1  | Eukaryotic translation initiation factor 4 gamma 2 (eIF-4-gamma 2) (eIF-4G 2) (eIF4G 2) (p97) (Death-associated protein 5) (DAP-5).                                                                                                                                                                                                                 |
| 1641 | Q49A79           | 4                    | 19             | 6.2                   | 907    | 102389 | 7.1  | Eukaryotic translation initiation factor 4 gamma, 2                                                                                                                                                                                                                                                                                                 |
| 1641 | Q0VH01           | 4                    | 19             | 6.2                   | 907    | 102335 | 7.1  | Eukaryotic translation initiation factor 4 gamma, 2                                                                                                                                                                                                                                                                                                 |
| 1641 | Q59G42           | 4                    | 19             | 6                     | 940    | 105828 | 7.4  | Eukaryotic translation initiation factor 4 gamma, 2 variant                                                                                                                                                                                                                                                                                         |
| 1642 | Q68E01           | 4                    | 12             | 6.2                   | 1043   | 118070 | 5.8  | Integrator complex subunit 3                                                                                                                                                                                                                                                                                                                        |
| 1642 | Q68E01-2         | 4                    | 12             | 6.2                   | 1042   | 118013 | 5.8  | Isoform 2 of Q68E01                                                                                                                                                                                                                                                                                                                                 |
| 1643 | Q96C62           | 4                    | 15             | 6.2                   | 682    | 76915  | 10   | Transmembrane protein 112B                                                                                                                                                                                                                                                                                                                          |
| 1643 | Q9BU23           | 4                    | 15             | 5.9                   | 707    | 79698  | 10.1 | Transmembrane protein 153                                                                                                                                                                                                                                                                                                                           |
| 1644 | O60502-2         | 4                    | 7              | 6.5                   | 849    | 95331  | 5    | Isoform 2 of O60502                                                                                                                                                                                                                                                                                                                                 |
| 1644 | O60502           | 4                    | 7              | 6                     | 916    | 102915 | 4.9  | Bifunctional protein NCOAT (Nuclear cytoplasmic O-GlcNAcase and acetyltransferase) (Meningioma-expressed antigen 5) [Includes: Beta- hexosaminidase (EC 3.2.1.52) (N-acetyl-beta-glucosaminidase) (Beta-N-acetylhexosaminidase) (Hexosaminidase C) (N-acetyl-beta-D- glucosaminidase) (O-GlcNAcase); Histone acetyltransferase (EC 2.3.1.48) (HAT)] |
| 1645 | UPI000015C445    | 4                    | 10             | 6.3                   | 875    | 98503  | 5.4  | aminopeptidase puromycin sensitive                                                                                                                                                                                                                                                                                                                  |
| 1645 | P55786           | 4                    | 10             | 6                     | 919    | 103276 | 5.7  | Puromycin-sensitive aminopeptidase                                                                                                                                                                                                                                                                                                                  |
| 1646 | P28340           | 4                    | 8              | 5.9                   | 1107   | 123631 | 7    | DNA polymerase delta catalytic subunit                                                                                                                                                                                                                                                                                                              |
| 1646 | UPI00001297C1    | 4                    | 8              | 5.9                   | 1107   | 123635 | 7    | polymerase (DNA directed), delta 1, catalytic subunit 125kDa                                                                                                                                                                                                                                                                                        |
| 1646 | Q308M6           | 4                    | 8              | 5.7                   | 1133   | 126338 | 7.4  | DNA-directed polymerase delta 1                                                                                                                                                                                                                                                                                                                     |
| 1647 | P33991           | 4                    | 13             | 5.9                   | 863    | 96558  | 6.7  | DNA replication licensing factor MCM4                                                                                                                                                                                                                                                                                                               |
| 1648 | O60341           | 4                    | 6              | 5.8                   | 852    | 92903  | 6.5  | Lysine-specific histone demethylase 1                                                                                                                                                                                                                                                                                                               |
| 1648 | UPI0000D61E80    | 4                    | 6              | 5.6                   | 876    | 95223  | 6.2  | Lysine-specific histone demethylase 1 (EC 1.-.-.) (Flavin-containing amine oxidase domain-containing protein 2) (BRAAF35-HDAC complex protein BHC110).                                                                                                                                                                                              |
| 1648 | O60341-2         | 4                    | 6              | 5.6                   | 876    | 95155  | 6.2  | Isoform 2 of O60341                                                                                                                                                                                                                                                                                                                                 |
| 1649 | P58215           | 4                    | 8              | 5.8                   | 753    | 83166  | 6.9  | Lysyl oxidase homolog 3 precursor                                                                                                                                                                                                                                                                                                                   |
| 1650 | Q63ZY3           | 4                    | 8              | 5.8                   | 851    | 91174  | 5.6  | Ankyrin repeat domain-containing protein 25                                                                                                                                                                                                                                                                                                         |
| 1650 | Q63ZY3-3         | 4                    | 8              | 5.8                   | 841    | 90044  | 6    | Isoform 3 of Q63ZY3                                                                                                                                                                                                                                                                                                                                 |
| 1651 | Q9BVJ6           | 4                    | 7              | 5.8                   | 771    | 87978  | 7.9  | U3 small nucleolar RNA-associated protein 14 homolog A                                                                                                                                                                                                                                                                                              |
| 1652 | Q96RP9           | 4                    | 11             | 5.7                   | 751    | 83472  | 7    | Elongation factor G 1, mitochondrial precursor                                                                                                                                                                                                                                                                                                      |

| No.  | Accession Number | Unique Peptide Count | Spectrum Count | Sequence Coverage (%) | Length | MolWt  | pI  | Descriptive Name                                                                                                                                                                |
|------|------------------|----------------------|----------------|-----------------------|--------|--------|-----|---------------------------------------------------------------------------------------------------------------------------------------------------------------------------------|
| 1652 | UPI0000D61B9E    | 4                    | 11             | 5.7                   | 753    | 83632  | 7   | Elongation factor G 1, mitochondrial precursor (mEF-G 1) (Elongation factor G1).                                                                                                |
| 1653 | P50416-2         | 4                    | 15             | 5.7                   | 756    | 86239  | 8.4 | Isoform 2 of P50416                                                                                                                                                             |
| 1653 | P50416           | 4                    | 15             | 5.6                   | 773    | 88368  | 8.7 | Carnitine O-palmitoyltransferase I, liver isoform                                                                                                                               |
| 1654 | Q92888-2         | 4                    | 13             | 6                     | 879    | 98768  | 5.6 | Isoform 2 of Q92888                                                                                                                                                             |
| 1654 | Q92888           | 4                    | 13             | 5.8                   | 912    | 102435 | 5.7 | Rho guanine nucleotide exchange factor 1                                                                                                                                        |
| 1654 | Q6NX52           | 4                    | 13             | 5.6                   | 948    | 105854 | 6.5 | ARHGEF1 protein                                                                                                                                                                 |
| 1654 | UPI0000D617B4    | 4                    | 13             | 5.6                   | 947    | 105660 | 6.6 | Rho guanine nucleotide exchange factor 1 (p115-RhoGEF) (p115RhoGEF) (115 kDa guanine nucleotide exchange factor) (Sub1.5).                                                      |
| 1655 | Q8N1F7           | 4                    | 14             | 5.6                   | 819    | 93488  | 5.7 | Nuclear pore complex protein Nup93                                                                                                                                              |
| 1655 | UPI0000070C22    | 4                    | 14             | 5.6                   | 819    | 93557  | 5.8 | nucleoporin 93kDa                                                                                                                                                               |
| 1656 | A4D169           | 4                    | 5              | 5.3                   | 856    | 97687  | 6.5 | Oxysterol binding protein-like 3                                                                                                                                                |
| 1656 | Q9H4L5           | 4                    | 5              | 5.1                   | 887    | 101224 | 6.9 | Oxysterol-binding protein-related protein 3                                                                                                                                     |
| 1657 | Q14CX7           | 4                    | 6              | 5.1                   | 972    | 112292 | 6.6 | Uncharacterized protein C12orf30                                                                                                                                                |
| 1657 | Q7Z4N6           | 4                    | 6              | 5.1                   | 972    | 112277 | 6.6 | P120                                                                                                                                                                            |
| 1658 | O94906           | 4                    | 7              | 5                     | 941    | 106925 | 8.3 | Pre-mRNA-processing factor 6                                                                                                                                                    |
| 1659 | P00533-4         | 4                    | 5              | 9.7                   | 628    | 69228  | 7.1 | Isoform 4 of P00533                                                                                                                                                             |
| 1659 | Q68GS6           | 4                    | 5              | 9.5                   | 645    | 70823  | 7.1 | Epidermal growth factor receptor                                                                                                                                                |
| 1659 | P00533           | 4                    | 5              | 5                     | 1210   | 134277 | 6.7 | Epidermal growth factor receptor precursor                                                                                                                                      |
| 1659 | Q2TTR7           | 4                    | 5              | 5                     | 1210   | 134323 | 6.7 | Cell growth inhibiting protein 40                                                                                                                                               |
| 1660 | Q59E90           | 4                    | 13             | 5                     | 1007   | 113305 | 7.2 | Mannosidase, alpha, class 2B, member 1 variant                                                                                                                                  |
| 1661 | Q7RTP6-2         | 4                    | 4              | 5.2                   | 948    | 106837 | 8.2 | Isoform 2 of Q7RTP6                                                                                                                                                             |
| 1661 | UPI0000DD85C8    | 4                    | 4              | 5.1                   | 963    | 108956 | 8.4 | PREDICTED: similar to Protein MICAL-3                                                                                                                                           |
| 1661 | Q7RTP6           | 4                    | 4              | 5                     | 976    | 109911 | 8.4 | Protein MICAL-3                                                                                                                                                                 |
| 1662 | O15451           | 4                    | 14             | 4.9                   | 1021   | 109140 | 4.3 | Proline and glutamic acid rich nuclear protein isoform                                                                                                                          |
| 1662 | UPI0000D622A9    | 4                    | 14             | 4.8                   | 1042   | 110225 | 4.3 | PELP1_HUMAN Isoform 2 of Q8IZL8 - Homo sapiens (Human)                                                                                                                          |
| 1662 | UPI00000740E9    | 4                    | 14             | 4.4                   | 1130   | 119624 | 4.3 | proline-, glutamic acid-, leucine-rich protein 1                                                                                                                                |
| 1662 | Q8IZL8           | 4                    | 14             | 4.4                   | 1130   | 119700 | 4.3 | Proline-, glutamic acid- and leucine-rich protein 1                                                                                                                             |
| 1662 | UPI000013E710    | 4                    | 14             | 3.9                   | 1272   | 135374 | 4.4 | PELP1_HUMAN Isoform 2 of Q8IZL8 - Homo sapiens (Human)                                                                                                                          |
| 1662 | Q8IZL8-2         | 4                    | 14             | 3.9                   | 1275   | 135495 | 4.4 | Isoform 2 of Q8IZL8                                                                                                                                                             |
| 1663 | Q8WTT2           | 4                    | 9              | 4.9                   | 800    | 92548  | 9.2 | Nucleolar complex protein 3 homolog                                                                                                                                             |
| 1663 | UPI0000D60F9F    | 4                    | 9              | 4.9                   | 800    | 92624  | 9.2 | Nucleolar complex protein 3 homolog (NOC3 protein homolog) (NOC3-like protein) (Nucleolar complex-associated protein 3-like protein) (Factor for adipocyte differentiation 24). |
| 1664 | Q96JM3           | 4                    | 5              | 4.9                   | 812    | 89099  | 8.4 | Zinc finger protein KIAA1802                                                                                                                                                    |
| 1665 | Q96T88           | 4                    | 5              | 4.9                   | 793    | 89814  | 7.6 | E3 ubiquitin-protein ligase UHRF1                                                                                                                                               |



| No.  | Accession Number | Unique Peptide Count | Spectrum Count | Sequence Coverage (%) | Length | MolWt  | pI  | Descriptive Name                                                                                                                                                                                                                                               |
|------|------------------|----------------------|----------------|-----------------------|--------|--------|-----|----------------------------------------------------------------------------------------------------------------------------------------------------------------------------------------------------------------------------------------------------------------|
| 1665 | UPI0000456BDE    | 4                    | 5              | 4.9                   | 792    | 89743  | 7.6 | E3 ubiquitin-protein ligase UHRF1 (EC 6.3.2.-) (Ubiquitin-like PHD and RING finger domain-containing protein 1) (Ubiquitin-like-containing PHD and RING finger domains protein 1) (Inverted CCAAT box-binding protein of 90 kDa) (Transcription factor ICBP90) |
| 1665 | UPI0000D48B65    | 4                    | 5              | 4.8                   | 806    | 91100  | 7.4 | ubiquitin-like, containing PHD and RING finger domains, 1 isoform 2                                                                                                                                                                                            |
| 1666 | Q9Y6Y8-2         | 4                    | 11             | 5.3                   | 924    | 102187 | 5.8 | Isoform 2 of Q9Y6Y8                                                                                                                                                                                                                                            |
| 1666 | Q9Y6Y8           | 4                    | 11             | 4.9                   | 1000   | 111076 | 5.5 | SEC23-interacting protein                                                                                                                                                                                                                                      |
| 1667 | A4D228           | 4                    | 4              | 4.7                   | 1156   | 132195 | 6.8 | More than blood homolog                                                                                                                                                                                                                                        |
| 1667 | Q86XI2           | 4                    | 4              | 4.7                   | 1143   | 130960 | 6.9 | Condensin-II complex subunit G2                                                                                                                                                                                                                                |
| 1668 | Q8NFA7           | 4                    | 4              | 5.1                   | 940    | 103581 | 7.1 | Transmembrane receptor PTK7-3                                                                                                                                                                                                                                  |
| 1668 | UPI0000457445    | 4                    | 4              | 4.7                   | 1015   | 112354 | 6.9 | Tyrosine-protein kinase-like 7 precursor (Colon carcinoma kinase 4) (CCK-4).                                                                                                                                                                                   |
| 1668 | Q8NFA8           | 4                    | 4              | 4.7                   | 1030   | 113805 | 7   | Transmembrane receptor PTK7-2                                                                                                                                                                                                                                  |
| 1668 | Q8NFA6           | 4                    | 4              | 4.7                   | 1014   | 112261 | 7   | Transmembrane receptor PTK7-4                                                                                                                                                                                                                                  |
| 1668 | Q13308           | 4                    | 4              | 4.5                   | 1070   | 118392 | 7.1 | Tyrosine-protein kinase-like 7 precursor                                                                                                                                                                                                                       |
| 1668 | Q6IQ54           | 4                    | 4              | 4.5                   | 1070   | 118376 | 7.1 | PTK7 protein tyrosine kinase 7                                                                                                                                                                                                                                 |
| 1669 | Q9HAU5           | 4                    | 6              | 4.5                   | 1272   | 147810 | 5.7 | Regulator of nonsense transcripts 2                                                                                                                                                                                                                            |
| 1670 | Q6PD62           | 4                    | 6              | 4.4                   | 1173   | 133502 | 6.8 | RNA polymerase-associated protein CTR9 homolog                                                                                                                                                                                                                 |
| 1671 | Q6NX72           | 4                    | 15             | 4.3                   | 1160   | 132322 | 5.8 | EHBP1 protein                                                                                                                                                                                                                                                  |
| 1671 | Q6QNV2           | 4                    | 15             | 4.2                   | 1196   | 136237 | 5.4 | EH domain binding protein 1                                                                                                                                                                                                                                    |
| 1671 | UPI000013D49A    | 4                    | 15             | 4.1                   | 1231   | 140017 | 5.3 | EH domain binding protein 1                                                                                                                                                                                                                                    |
| 1671 | Q8NDI1           | 4                    | 15             | 4.1                   | 1231   | 139858 | 5.4 | EH domain-binding protein 1                                                                                                                                                                                                                                    |
| 1672 | Q7Z7M9           | 4                    | 23             | 4.3                   | 940    | 106266 | 9.5 | Polypeptide N-acetylgalactosaminyltransferase 5                                                                                                                                                                                                                |
| 1673 | Q9UIA9           | 4                    | 18             | 4.3                   | 1087   | 123907 | 6.3 | Exportin-7                                                                                                                                                                                                                                                     |
| 1673 | UPI000049E0B7    | 4                    | 18             | 4.3                   | 1087   | 123975 | 6.3 | Exportin-7 (Exp7) (Ran-binding protein 16).                                                                                                                                                                                                                    |
| 1673 | UPI0000073676    | 4                    | 18             | 4.3                   | 1087   | 123953 | 6.3 | exportin 7                                                                                                                                                                                                                                                     |
| 1674 | Q59HA5           | 4                    | 12             | 4.6                   | 1196   | 130790 | 5.8 | Cyclin G-associated kinase variant                                                                                                                                                                                                                             |
| 1674 | Q5U4P5           | 4                    | 12             | 4.5                   | 1232   | 134410 | 5.8 | GAK protein                                                                                                                                                                                                                                                    |
| 1674 | O14976           | 4                    | 12             | 4.2                   | 1311   | 143190 | 5.7 | Cyclin G-associated kinase                                                                                                                                                                                                                                     |
| 1674 | UPI0000161B7C    | 4                    | 12             | 4.2                   | 1311   | 143164 | 5.7 | cyclin G associated kinase                                                                                                                                                                                                                                     |
| 1675 | P30876           | 4                    | 5              | 4.1                   | 1174   | 133896 | 6.9 | DNA-directed RNA polymerase II 140 kDa polypeptide                                                                                                                                                                                                             |
| 1676 | P56199           | 4                    | 8              | 4.1                   | 1179   | 130848 | 6.3 | Integrin alpha-1 precursor                                                                                                                                                                                                                                     |
| 1676 | UPI0000D61624    | 4                    | 8              | 4.1                   | 1180   | 130988 | 6.3 | Integrin alpha-1 precursor (Laminin and collagen receptor) (VLA-1) (CD49a antigen).                                                                                                                                                                            |
| 1677 | Q14527           | 4                    | 13             | 4.1                   | 1009   | 113928 | 8.6 | Helicase-like transcription factor                                                                                                                                                                                                                             |
| 1677 | Q59GQ7           | 4                    | 13             | 4.1                   | 992    | 111966 | 8.7 | SWI/SNF-related matrix-associated actin-dependent regulator of chromatin a3 variant                                                                                                                                                                            |
| 1678 | Q16706           | 4                    | 20             | 4                     | 1144   | 131084 | 7.6 | Alpha-mannosidase 2                                                                                                                                                                                                                                            |

| No.  | Accession Number | Unique Peptide Count | Spectrum Count | Sequence Coverage (%) | Length | MolWt  | pI  | Descriptive Name                                                                                                                                                                |
|------|------------------|----------------------|----------------|-----------------------|--------|--------|-----|---------------------------------------------------------------------------------------------------------------------------------------------------------------------------------|
| 1678 | UPI000013D193    | 4                    | 20             | 4                     | 1144   | 131140 | 7.6 | mannosidase, alpha, class 2A, member 1                                                                                                                                          |
| 1679 | Q6PL18           | 4                    | 8              | 4                     | 1390   | 158554 | 6.3 | ATPase family AAA domain-containing protein 2                                                                                                                                   |
| 1680 | O95197-3         | 4                    | 55             | 16.5                  | 236    | 25609  | 8.5 | Isoform 3 of O95197                                                                                                                                                             |
| 1680 | O95197-4         | 4                    | 55             | 15.3                  | 255    | 27568  | 8.2 | Isoform 4 of O95197                                                                                                                                                             |
| 1680 | UPI0000D62622    | 4                    | 55             | 15.2                  | 257    | 27753  | 8.2 | Reticulon-3 (Neuroendocrine-specific protein-like 2) (NSP-like protein II) (NSPLII).                                                                                            |
| 1680 | O95197           | 4                    | 55             | 3.8                   | 1032   | 112611 | 5   | Reticulon-3                                                                                                                                                                     |
| 1680 | UPI0000D62623    | 4                    | 55             | 3.8                   | 1034   | 112754 | 5   | Reticulon-3 (Neuroendocrine-specific protein-like 2) (NSP-like protein II) (NSPLII).                                                                                            |
| 1680 | O95197-2         | 4                    | 55             | 3.8                   | 1013   | 110652 | 5   | Isoform 2 of O95197                                                                                                                                                             |
| 1681 | Q9NVU3           | 4                    | 5              | 5.3                   | 864    | 96378  | 6.7 | CDNA FLJ10506 fis, clone NT2RP2000510                                                                                                                                           |
| 1681 | Q9BZH6           | 4                    | 5              | 3.8                   | 1224   | 136685 | 6.9 | Bromodomain and WD repeat domain-containing protein 2                                                                                                                           |
| 1682 | A0JP11           | 4                    | 5              | 3.7                   | 1358   | 153158 | 7.2 | Phosphoinositide-3-kinase, regulatory subunit 4, p150                                                                                                                           |
| 1682 | Q99570           | 4                    | 5              | 3.7                   | 1358   | 153103 | 7.2 | Phosphoinositide 3-kinase regulatory subunit 4                                                                                                                                  |
| 1683 | P35251           | 4                    | 7              | 3.6                   | 1148   | 128254 | 9.4 | Replication factor C subunit 1                                                                                                                                                  |
| 1683 | P35251-2         | 4                    | 7              | 3.6                   | 1147   | 128183 | 9.4 | Isoform 2 of P35251                                                                                                                                                             |
| 1684 | Q08AD0           | 4                    | 10             | 3.6                   | 1516   | 174700 | 6.9 | UDP-glucose ceramide glucosyltransferase-like 2                                                                                                                                 |
| 1684 | UPI00001FC9AA    | 4                    | 10             | 3.6                   | 1516   | 174734 | 6.9 | UDP-glucose:glycoprotein glucosyltransferase 2 precursor (EC 2.4.1.-) (UDP-glucose ceramide glucosyltransferase-like 1) (UDP-- Glc:glycoprotein glucosyltransferase 2) (HUGT2). |
| 1684 | UPI0000137AEE    | 4                    | 10             | 3.6                   | 1516   | 174760 | 6.9 | UDP-glucose:glycoprotein glucosyltransferase 2                                                                                                                                  |
| 1684 | Q9NYU1           | 4                    | 10             | 3.6                   | 1516   | 174718 | 6.9 | UDP-glucose:glycoprotein glucosyltransferase 2 precursor                                                                                                                        |
| 1685 | Q8WWM7-6         | 4                    | 11             | 3.9                   | 968    | 102895 | 8.6 | Isoform 6 of Q8WWM7                                                                                                                                                             |
| 1685 | Q63ZY4           | 4                    | 11             | 3.6                   | 1062   | 112091 | 8.7 | ATXN2L protein                                                                                                                                                                  |
| 1685 | UPI0000161370    | 4                    | 11             | 3.6                   | 1044   | 110143 | 8.8 | ataxin 2 related protein isoform E                                                                                                                                              |
| 1685 | UPI000015FF26    | 4                    | 11             | 3.6                   | 1062   | 111920 | 8.7 | ataxin 2 related protein isoform B                                                                                                                                              |
| 1685 | Q8WWM7-5         | 4                    | 11             | 3.6                   | 1044   | 110177 | 8.8 | Isoform 5 of Q8WWM7                                                                                                                                                             |
| 1685 | Q8WWM7-4         | 4                    | 11             | 3.6                   | 1044   | 110326 | 8.9 | Isoform 4 of Q8WWM7                                                                                                                                                             |
| 1685 | Q8WWM7-2         | 4                    | 11             | 3.6                   | 1062   | 111954 | 8.7 | Isoform 2 of Q8WWM7                                                                                                                                                             |
| 1685 | Q8WWM7-3         | 4                    | 11             | 3.5                   | 1097   | 115582 | 8.7 | Isoform 3 of Q8WWM7                                                                                                                                                             |
| 1685 | Q8WWM7           | 4                    | 11             | 3.5                   | 1075   | 113374 | 8.6 | Ataxin-2-like protein                                                                                                                                                           |
| 1686 | Q96K76-2         | 4                    | 5              | 3.7                   | 1287   | 147179 | 5.1 | Isoform 2 of Q96K76                                                                                                                                                             |
| 1686 | Q96K76           | 4                    | 5              | 3.5                   | 1375   | 157268 | 5.1 | Ubiquitin carboxyl-terminal hydrolase 47                                                                                                                                        |
| 1686 | UPI0000D625BB    | 4                    | 5              | 3.5                   | 1362   | 155859 | 5.1 | Ubiquitin carboxyl-terminal hydrolase 47 (EC 3.1.2.15) (Ubiquitin thioesterase 47) (Ubiquitin-specific-processing protease 47) (Deubiquitinating enzyme 47).                    |
| 1687 | UPI00001D7C42    | 4                    | 8              | 3.5                   | 1593   | 182774 | 8.4 | THO complex 2 isoform 1                                                                                                                                                         |
| 1688 | Q9H7M7           | 4                    | 14             | 3.6                   | 1415   | 148907 | 4.7 | FLJ00043 protein                                                                                                                                                                |
| 1688 | Q8N3D4           | 4                    | 14             | 3.4                   | 1510   | 160311 | 4.8 | EH domain-binding protein 1-like protein 1                                                                                                                                      |

| No.  | Accession Number | Unique Peptide Count | Spectrum Count | Sequence Coverage (%) | Length | MolWt  | pI  | Descriptive Name                                                                                                                                                    |
|------|------------------|----------------------|----------------|-----------------------|--------|--------|-----|---------------------------------------------------------------------------------------------------------------------------------------------------------------------|
| 1688 | UPI000013EE70    | 4                    | 14             | 3.4                   | 1510   | 160283 | 4.8 | Signal-induced proliferation-associated protein 1 (Sipa-1) (GTPase-activating protein Spa-1) (p130 SPA-1).                                                          |
| 1689 | P08572           | 4                    | 9              | 3.2                   | 1712   | 167553 | 8.7 | Collagen alpha-2(IV) chain precursor [Contains: Canstatin]                                                                                                          |
| 1689 | UPI0000D61AA5    | 4                    | 9              | 3.2                   | 1706   | 167211 | 8.6 | Collagen alpha-2(IV) chain precursor.                                                                                                                               |
| 1689 | UPI0000D61AA4    | 4                    | 9              | 3.2                   | 1712   | 167607 | 8.6 | Collagen alpha-2(IV) chain precursor.                                                                                                                               |
| 1689 | UPI00004588A6    | 4                    | 9              | 3.2                   | 1706   | 167157 | 8.6 | Collagen alpha-2(IV) chain precursor.                                                                                                                               |
| 1690 | UPI00004FCB0F    | 4                    | 8              | 3.3                   | 1400   | 159300 | 5   | Remodeling and spacing factor 1 (Rsf-1) (Hepatitis B virus X-associated protein) (HBV pX-associated protein 8) (p325 subunit of RSF chromatin remodelling complex). |
| 1690 | Q96T23-2         | 4                    | 8              | 3.3                   | 1400   | 159314 | 5   | Isoform 2 of Q96T23                                                                                                                                                 |
| 1690 | Q96T23           | 4                    | 8              | 3.2                   | 1431   | 163005 | 5   | Remodeling and spacing factor 1                                                                                                                                     |
| 1690 | UPI00001FB001    | 4                    | 8              | 3.2                   | 1441   | 163820 | 5   | remodeling and spacing factor 1                                                                                                                                     |
| 1691 | Q9BZF9           | 4                    | 7              | 3                     | 1416   | 162504 | 7   | Uveal autoantigen with coiled-coil domains and ankyrin repeats                                                                                                      |
| 1692 | Q29RG0           | 4                    | 6              | 2.9                   | 1392   | 156767 | 5.4 | CAP-GLY domain containing linker protein 1                                                                                                                          |
| 1692 | P30622-2         | 4                    | 6              | 2.9                   | 1392   | 156781 | 5.4 | Isoform Short of P30622                                                                                                                                             |
| 1692 | A0AVD3           | 4                    | 6              | 2.8                   | 1438   | 162246 | 5.4 | CLIP1 protein                                                                                                                                                       |
| 1692 | Q17RS4           | 4                    | 6              | 2.8                   | 1438   | 162270 | 5.4 | CLIP1 protein                                                                                                                                                       |
| 1692 | P30622           | 4                    | 6              | 2.8                   | 1427   | 160989 | 5.4 | CAP-Gly domain-containing linker protein 1                                                                                                                          |
| 1693 | P48634           | 4                    | 8              | 2.5                   | 2157   | 228858 | 9.5 | Large proline-rich protein BAT2                                                                                                                                     |
| 1693 | UPI000020E69E    | 4                    | 8              | 2.5                   | 2157   | 228829 | 9.5 | Large proline-rich protein BAT2 (HLA-B-associated transcript 2).                                                                                                    |
| 1693 | UPI000020E56F    | 4                    | 8              | 2.5                   | 2157   | 228861 | 9.5 | HLA-B associated transcript 2 (BAT2), transcript variant 1, mRNA                                                                                                    |
| 1693 | UPI00000703A1    | 4                    | 8              | 2.5                   | 2157   | 228869 | 9.5 | HLA-B associated transcript-2 isoform a                                                                                                                             |
| 1693 | Q05BK4           | 4                    | 8              | 2.5                   | 2157   | 228706 | 9.4 | BAT2 protein                                                                                                                                                        |
| 1694 | Q96N67           | 4                    | 7              | 2.3                   | 2140   | 242558 | 6.8 | Dedicator of cytokinesis protein 7                                                                                                                                  |
| 1694 | UPI0000D61F29    | 4                    | 7              | 2.3                   | 2107   | 239160 | 6.8 | Dedicator of cytokinesis protein 7.                                                                                                                                 |
| 1694 | Q96N67-6         | 4                    | 7              | 2.3                   | 2131   | 241670 | 6.8 | Isoform 6 of Q96N67                                                                                                                                                 |
| 1694 | Q96N67-5         | 4                    | 7              | 2.3                   | 2109   | 239420 | 6.8 | Isoform 5 of Q96N67                                                                                                                                                 |
| 1694 | Q96N67-4         | 4                    | 7              | 2.3                   | 2098   | 238272 | 6.8 | Isoform 4 of Q96N67                                                                                                                                                 |
| 1694 | Q96N67-3         | 4                    | 7              | 2.3                   | 2100   | 238532 | 6.8 | Isoform 3 of Q96N67                                                                                                                                                 |
| 1694 | Q96N67-2         | 4                    | 7              | 2.3                   | 2129   | 241410 | 6.8 | Isoform 2 of Q96N67                                                                                                                                                 |
| 1695 | Q5VTN2           | 4                    | 5              | 2.2                   | 2193   | 250502 | 7.2 | OTTHUMP00000016904                                                                                                                                                  |
| 1695 | UPI000014145A    | 4                    | 5              | 2.2                   | 2202   | 251458 | 7.1 | activating signal cointegrator 1 complex subunit 3 isoform a                                                                                                        |
| 1695 | Q8N3C0           | 4                    | 5              | 2.2                   | 2202   | 251488 | 7.1 | Activating signal cointegrator 1 complex subunit 3                                                                                                                  |
| 1696 | Q8WYP5           | 4                    | 7              | 1.9                   | 2275   | 253458 | 6.6 | AT-hook-containing transcription factor 1                                                                                                                           |
| 1696 | UPI0000DD79DA    | 4                    | 7              | 1.9                   | 2223   | 247774 | 6.7 | PREDICTED: similar to transcription factor ELYS                                                                                                                     |

| No.  | Accession Number | Unique Peptide Count | Spectrum Count | Sequence Coverage (%) | Length | MolWt  | pI  | Descriptive Name                                                                                                                                                                         |
|------|------------------|----------------------|----------------|-----------------------|--------|--------|-----|------------------------------------------------------------------------------------------------------------------------------------------------------------------------------------------|
| 1696 | UPI000059D0E4    | 4                    | 7              | 1.9                   | 2301   | 255998 | 6.6 | AT-hook-containing transcription factor 1 (Embryonic large molecule derived from yolk sac).                                                                                              |
| 1696 | UPI0000456336    | 4                    | 7              | 1.9                   | 2302   | 256411 | 7   | AT-hook-containing transcription factor 1 (Embryonic large molecule derived from yolk sac).                                                                                              |
| 1696 | Q8WYP5-2         | 4                    | 7              | 1.9                   | 2304   | 256273 | 6.6 | Isoform 2 of Q8WYP5                                                                                                                                                                      |
| 1697 | UPI0000366852    | 4                    | 21             | 2.2                   | 2136   | 225686 | 6.4 | Serine/threonine-protein kinase WNK1 (EC 2.7.11.1) (Protein kinase with no lysine 1) (Protein kinase, lysine-deficient 1) (Kinase deficient protein) (Erythrocyte 65 kDa protein) (p65). |
| 1697 | Q9H4A3-2         | 4                    | 21             | 2.2                   | 2136   | 225648 | 6.4 | Isoform 2 of Q9H4A3                                                                                                                                                                      |
| 1697 | Q9H4A3           | 4                    | 21             | 1.9                   | 2382   | 250753 | 6.3 | Serine/threonine-protein kinase WNK1                                                                                                                                                     |
| 1697 | UPI000013CD65    | 4                    | 21             | 1.9                   | 2382   | 250791 | 6.3 | Serine/threonine-protein kinase WNK1 (EC 2.7.11.1) (Protein kinase with no lysine 1) (Protein kinase, lysine-deficient 1) (Kinase deficient protein) (Erythrocyte 65 kDa protein) (p65). |
| 1698 | P42858           | 4                    | 6              | 1.8                   | 3144   | 347859 | 6.2 | Huntingtin                                                                                                                                                                               |
| 1698 | UPI0000D61535    | 4                    | 6              | 1.8                   | 3142   | 347775 | 6.2 | Huntingtin (Huntington disease protein) (HD protein).                                                                                                                                    |
| 1698 | UPI000013D567    | 4                    | 6              | 1.8                   | 3142   | 347603 | 6.2 | Huntingtin (Huntington disease protein) (HD protein).                                                                                                                                    |
| 1699 | Q5TBT1           | 4                    | 4              | 1.3                   | 5457   | 625004 | 5.7 | Dystonin                                                                                                                                                                                 |
| 1699 | UPI0000457907    | 4                    | 4              | 1.3                   | 5497   | 629750 | 5.7 | Bullous pemphigoid antigen 1, isoforms 1/2/3/4/5/8 (230 kDa bullous pemphigoid antigen) (BPA) (Hemidesmosomal plaque protein) (Dystonia musculorum protein) (Dystonin)                   |
| 1699 | UPI00001C1576    | 4                    | 4              | 1.3                   | 5497   | 629794 | 5.7 | dystonin isoform 1                                                                                                                                                                       |
| 1699 | UPI0000D626B7    | 4                    | 4              | 1                     | 7545   | 857472 | 5.2 | Bullous pemphigoid antigen 1, isoforms 1/2/3/4/5/8 (230 kDa bullous pemphigoid antigen) (BPA) (Hemidesmosomal plaque protein) (Dystonia musculorum protein) (Dystonin)                   |
| 1699 | Q5TBT2           | 4                    | 4              | 1                     | 7543   | 857331 | 5.2 | Dystonin                                                                                                                                                                                 |
| 1700 | Q709C8           | 4                    | 11             | 1.1                   | 3753   | 422393 | 6.8 | Vacuolar protein sorting-associated protein 13C                                                                                                                                          |
| 1700 | UPI000023BD43    | 4                    | 11             | 1.1                   | 3585   | 403087 | 6.4 | vacuolar protein sorting 13C protein isoform 1B                                                                                                                                          |
| 1700 | Q709C8-4         | 4                    | 11             | 1.1                   | 3584   | 402957 | 6.4 | Isoform 4 of Q709C8                                                                                                                                                                      |
| 1700 | Q709C8-3         | 4                    | 11             | 1.1                   | 3710   | 417279 | 6.6 | Isoform 3 of Q709C8                                                                                                                                                                      |
| 1700 | Q709C8-2         | 4                    | 11             | 1.1                   | 3627   | 408072 | 6.6 | Isoform 2 of Q709C8                                                                                                                                                                      |
| 1701 | P14618-2         | 3                    | 15             | 64.8                  | 531    | 58062  | 7.7 | Isoform M1 of P14618                                                                                                                                                                     |
| 1702 | O75506           | 3                    | 11             | 64.5                  | 76     | 8544   | 4.4 | Heat shock factor-binding protein 1                                                                                                                                                      |
| 1702 | UPI000013E5CF    | 3                    | 11             | 59                    | 83     | 9349   | 4.4 | Heat shock factor-binding protein 1 (Nasopharyngeal carcinoma-associated antigen 13) (NPC-A-13).                                                                                         |
| 1703 | P61960           | 3                    | 22             | 60                    | 85     | 9118   | 9.3 | Ubiquitin-fold modifier 1 precursor                                                                                                                                                      |

| No.  | Accession Number | Unique Peptide Count | Spectrum Count | Sequence Coverage (%) | Length | MolWt | pI   | Descriptive Name                                                |
|------|------------------|----------------------|----------------|-----------------------|--------|-------|------|-----------------------------------------------------------------|
| 1704 | UPI0000D621E1    | 3                    | 49             | 58.7                  | 448    | 49764 | 5.1  | Tubulin alpha-6 chain (Alpha-tubulin 6).                        |
| 1704 | Q53GA7           | 3                    | 49             | 58.6                  | 449    | 49823 | 5.1  | Tubulin alpha 6 variant                                         |
| 1704 | Q9BQE3           | 3                    | 49             | 58.6                  | 449    | 49895 | 5.1  | Tubulin alpha-6 chain                                           |
| 1705 | Q13885           | 3                    | 8              | 57.8                  | 445    | 49907 | 4.9  | Tubulin beta-2A chain                                           |
| 1706 | P61204           | 3                    | 60             | 53.6                  | 181    | 20601 | 7.4  | ADP-ribosylation factor 3                                       |
| 1706 | P84077           | 3                    | 60             | 53.6                  | 181    | 20697 | 6.8  | ADP-ribosylation factor 1                                       |
| 1707 | O95167           | 3                    | 14             | 50                    | 84     | 9279  | 8.5  | NADH dehydrogenase [ubiquinone] 1 alpha subcomplex subunit 3    |
| 1708 | P62857           | 3                    | 104            | 46.4                  | 69     | 7841  | 10.7 | 40S ribosomal protein S28                                       |
| 1708 | UPI000013E08B    | 3                    | 104            | 46.4                  | 69     | 7823  | 10.7 | ribosomal protein S28 (RPS28), mRNA                             |
| 1709 | Q9C005           | 3                    | 20             | 45.5                  | 99     | 11250 | 4.9  | Dpy-30-like protein                                             |
| 1710 | Q9Y281           | 3                    | 10             | 45.2                  | 166    | 18737 | 7.9  | Cofilin-2                                                       |
| 1711 | P62834           | 3                    | 7              | 45.1                  | 184    | 20987 | 6.6  | Ras-related protein Rap-1A precursor                            |
| 1712 | P62140           | 3                    | 13             | 43.4                  | 327    | 37187 | 6.2  | Serine/threonine-protein phosphatase PP1-beta catalytic subunit |
| 1713 | P04271           | 3                    | 64             | 40.2                  | 92     | 10713 | 4.6  | Protein S100-B                                                  |
| 1714 | Q9BZL1           | 3                    | 26             | 39.7                  | 73     | 8547  | 8.4  | Ubiquitin-like protein 5                                        |
| 1715 | Q9Y3D7           | 3                    | 10             | 39.2                  | 125    | 13825 | 9.7  | Mitochondrial import inner membrane translocase subunit TIM16   |
| 1716 | Q9BWJ5           | 3                    | 22             | 38.4                  | 86     | 10135 | 6.4  | Splicing factor 3B subunit 5                                    |
| 1717 | A4FU11           | 3                    | 8              | 38.2                  | 262    | 29294 | 10.2 | RPS4Y1 protein                                                  |
| 1717 | Q496E4           | 3                    | 8              | 38                    | 263    | 29426 | 10.2 | Ribosomal protein S4, Y-linked 1                                |
| 1717 | P22090           | 3                    | 8              | 38                    | 263    | 29456 | 10.2 | 40S ribosomal protein S4, Y isoform 1                           |
| 1718 | O00244           | 3                    | 21             | 38.2                  | 68     | 7402  | 7.2  | Copper transport protein ATOX1                                  |
| 1718 | UPI0000D6169C    | 3                    | 21             | 38.2                  | 68     | 7449  | 7.2  | Copper transport protein ATOX1 (Metal transport protein ATX1).  |
| 1718 | Q6IBA3           | 3                    | 21             | 38.2                  | 68     | 7388  | 7.2  | ATOX1 protein                                                   |
| 1719 | Q9Y5J7           | 3                    | 9              | 38.2                  | 89     | 10378 | 7.2  | Mitochondrial import inner membrane translocase subunit Tim9    |
| 1720 | P62304           | 3                    | 35             | 38                    | 92     | 10804 | 9.4  | Small nuclear ribonucleoprotein E                               |
| 1721 | P35244           | 3                    | 13             | 37.2                  | 121    | 13569 | 5.1  | Replication protein A 14 kDa subunit                            |
| 1722 | P05114           | 3                    | 10             | 37                    | 100    | 10659 | 9.6  | Nonhistone chromosomal protein HMG-14                           |
| 1723 | Q5RI17           | 3                    | 6              | 36.7                  | 723    | 79844 | 7.9  | Heterogeneous nuclear ribonucleoprotein U                       |
| 1724 | P14174           | 3                    | 28             | 36.5                  | 115    | 12476 | 7.9  | Macrophage migration inhibitory factor                          |
| 1725 | Q99622           | 3                    | 10             | 36.5                  | 126    | 13178 | 5.1  | Putative C10 protein                                            |
| 1726 | UPI000016062E    | 3                    | 4              | 36.4                  | 118    | 12951 | 9.6  | PREDICTED: similar to BC003940 protein                          |
| 1727 | Q99878           | 3                    | 232            | 36.7                  | 128    | 13936 | 10.9 | Histone H2A type 1-J                                            |
| 1727 | Q96KK5           | 3                    | 232            | 36.7                  | 128    | 13906 | 10.9 | Histone H2A type 1-H                                            |
| 1727 | Q9BTM1           | 3                    | 232            | 36.4                  | 129    | 14019 | 10.9 | H2A histone family, member J                                    |
| 1727 | Q16777           | 3                    | 232            | 36.4                  | 129    | 13988 | 10.9 | Histone H2A type 2-C                                            |
| 1727 | P0C0S8           | 3                    | 232            | 36.2                  | 130    | 14091 | 10.9 | Histone H2A type 1                                              |
| 1727 | Q6FI13           | 3                    | 232            | 36.2                  | 130    | 14095 | 10.9 | Histone H2A type 2-A                                            |
| 1727 | P20671           | 3                    | 232            | 36.2                  | 130    | 14107 | 10.9 | Histone H2A type 1-D                                            |
| 1727 | UPI000013C8E5    | 3                    | 232            | 30.3                  | 155    | 16610 | 10.2 | H2A histone family, member J isoform 2                          |

| No.  | Accession Number | Unique Peptide Count | Spectrum Count | Sequence Coverage (%) | Length | MolWt | pI   | Descriptive Name                                                                       |
|------|------------------|----------------------|----------------|-----------------------|--------|-------|------|----------------------------------------------------------------------------------------|
| 1728 | P61769           | 3                    | 35             | 35.3                  | 119    | 13715 | 6.5  | Beta-2-microglobulin precursor [Contains: Beta-2-microglobulin variant pI 5.3]         |
| 1728 | Q6IAT8           | 3                    | 35             | 35.3                  | 119    | 13697 | 6.5  | B2M protein                                                                            |
| 1729 | Q3ZQAQ7          | 3                    | 12             | 34.7                  | 101    | 11354 | 7.2  | Hypothetical protein LOC203547                                                         |
| 1730 | P63027           | 3                    | 40             | 34.5                  | 116    | 12649 | 8.1  | Vesicle-associated membrane protein 2                                                  |
| 1730 | Q9N0Y0           | 3                    | 40             | 34.5                  | 116    | 12663 | 8.1  | Vesicle-associated membrane protein 2                                                  |
| 1731 | A2VBZ8           | 3                    | 9              | 37.4                  | 273    | 31456 | 5.8  | MHC class I antigen                                                                    |
| 1731 | A0JKD2           | 3                    | 9              | 34.2                  | 298    | 34040 | 5.8  | MHC class I                                                                            |
| 1732 | P62306           | 3                    | 52             | 33.7                  | 86     | 9725  | 4.7  | Small nuclear ribonucleoprotein F                                                      |
| 1732 | Q6IBQ1           | 3                    | 52             | 33.7                  | 86     | 9711  | 4.7  | SNRPF protein                                                                          |
| 1733 | P84090           | 3                    | 47             | 33.7                  | 104    | 12259 | 5.9  | Enhancer of rudimentary homolog                                                        |
| 1734 | Q7Z7F7           | 3                    | 8              | 33.6                  | 128    | 15128 | 11.2 | 39S ribosomal protein L55, mitochondrial precursor                                     |
| 1735 | Q8NDD5           | 3                    | 7              | 43                    | 128    | 14098 | 5.9  | Hypothetical protein DKFZp586L2318                                                     |
| 1735 | UPI00001B5789    | 3                    | 7              | 40.1                  | 137    | 15614 | 4.6  | ubiquitin-conjugating enzyme E2G 2 isoform 2                                           |
| 1735 | P60604           | 3                    | 7              | 33.3                  | 165    | 18566 | 4.7  | Ubiquitin-conjugating enzyme E2 G2                                                     |
| 1736 | Q5T179           | 3                    | 5              | 38.8                  | 67     | 8027  | 6.4  | CDC28 protein kinase regulatory subunit 1B                                             |
| 1736 | P61024           | 3                    | 5              | 32.9                  | 79     | 9660  | 8.9  | Cyclin-dependent kinases regulatory subunit 1                                          |
| 1736 | UPI0000161698    | 3                    | 5              | 32.9                  | 79     | 9660  | 8.7  | PREDICTED: similar to Cyclin-dependent kinases regulatory subunit 1 (CKS-1) (Sid 1334) |
| 1737 | Q49AP7           | 3                    | 15             | 32.6                  | 92     | 10739 | 8.5  | C1orf212 protein                                                                       |
| 1738 | P07108           | 3                    | 23             | 32.2                  | 87     | 10044 | 6.5  | Acyl-CoA-binding protein                                                               |
| 1738 | Q4VWZ6           | 3                    | 23             | 31.8                  | 88     | 10145 | 6.5  | Diazepam binding inhibitor, splice form 1c                                             |
| 1738 | Q3I231           | 3                    | 23             | 26.9                  | 104    | 11793 | 5.5  | Diazepam-binding protein                                                               |
| 1739 | A2IDD8           | 3                    | 8              | 32.1                  | 140    | 16241 | 6.6  | Vesicle-associated membrane protein 4                                                  |
| 1739 | O75379           | 3                    | 8              | 31.9                  | 141    | 16397 | 7.4  | Vesicle-associated membrane protein 4                                                  |
| 1740 | Q8N4H5           | 3                    | 4              | 52.9                  | 51     | 6035  | 9.7  | Uncharacterized protein C9orf105                                                       |
| 1740 | Q5JRT7           | 3                    | 4              | 31.8                  | 85     | 9655  | 7.2  | Chromosome 9 open reading frame 105                                                    |
| 1741 | P62318           | 3                    | 26             | 31.7                  | 126    | 13916 | 10.3 | Small nuclear ribonucleoprotein Sm D3                                                  |
| 1742 | Q8WYJ5           | 3                    | 12             | 39.8                  | 128    | 13918 | 7    | Protein kinase C inhibitor-2                                                           |
| 1742 | Q53HJ8           | 3                    | 12             | 31.3                  | 163    | 17174 | 9.5  | PKCI-1-related HIT protein variant                                                     |
| 1742 | Q9BX68           | 3                    | 12             | 31.3                  | 163    | 17162 | 9.1  | Histidine triad nucleotide-binding protein 2                                           |
| 1743 | P62072           | 3                    | 9              | 31.1                  | 90     | 10333 | 6.3  | Mitochondrial import inner membrane translocase subunit Tim10                          |
| 1744 | O96033           | 3                    | 8              | 30.7                  | 88     | 9755  | 4.7  | Molybdenum cofactor synthesis protein 2 small subunit                                  |
| 1745 | Q53FH6           | 3                    | 11             | 30.6                  | 124    | 13563 | 7.4  | Mitogen-activated protein kinase kinase 1 interacting protein 1 variant                |
| 1745 | Q9UHA4           | 3                    | 11             | 30.6                  | 124    | 13623 | 7.4  | Mitogen-activated protein kinase kinase 1-interacting protein 1                        |

| No.  | Accession Number | Unique Peptide Count | Spectrum Count | Sequence Coverage (%) | Length | MolWt | pI   | Descriptive Name                                                                                                                                                                                                                                  |
|------|------------------|----------------------|----------------|-----------------------|--------|-------|------|---------------------------------------------------------------------------------------------------------------------------------------------------------------------------------------------------------------------------------------------------|
| 1746 | Q8N4V1           | 3                    | 7              | 30.5                  | 131    | 14686 | 9.1  | Transmembrane protein 32                                                                                                                                                                                                                          |
| 1747 | P83916           | 3                    | 10             | 30.3                  | 185    | 21418 | 4.9  | Chromobox protein homolog 1                                                                                                                                                                                                                       |
| 1748 | Q6P1L8           | 3                    | 10             | 29.7                  | 145    | 15948 | 10.2 | 39S ribosomal protein L14, mitochondrial precursor                                                                                                                                                                                                |
| 1749 | O43920           | 3                    | 20             | 29.2                  | 106    | 12517 | 9.1  | NADH dehydrogenase [ubiquinone] iron-sulfur protein 5                                                                                                                                                                                             |
| 1750 | O60783           | 3                    | 14             | 28.9                  | 128    | 15139 | 11.4 | Mitochondrial 28S ribosomal protein S14                                                                                                                                                                                                           |
| 1751 | P26885           | 3                    | 14             | 28.9                  | 142    | 15649 | 9.1  | FK506-binding protein 2 precursor                                                                                                                                                                                                                 |
| 1752 | O43676           | 3                    | 20             | 28.6                  | 98     | 11402 | 9.2  | NADH dehydrogenase [ubiquinone] 1 beta subcomplex subunit 3                                                                                                                                                                                       |
| 1753 | Q8N9N8           | 3                    | 3              | 28.5                  | 165    | 19053 | 5.2  | CDNA FLJ36810 fis, clone ASTRO2001249                                                                                                                                                                                                             |
| 1754 | Q9NQP4           | 3                    | 15             | 28.4                  | 134    | 15314 | 4.5  | Prefoldin subunit 4                                                                                                                                                                                                                               |
| 1755 | Q86U75           | 3                    | 8              | 28.3                  | 619    | 67017 | 6    | Dihydropyrimidinase-like 2                                                                                                                                                                                                                        |
| 1756 | Q86SX6           | 3                    | 16             | 28                    | 157    | 16628 | 6.8  | Glutaredoxin-related protein 5                                                                                                                                                                                                                    |
| 1757 | O15212           | 3                    | 5              | 27.9                  | 129    | 14583 | 8.9  | Prefoldin subunit 6                                                                                                                                                                                                                               |
| 1758 | P61020           | 3                    | 11             | 27.9                  | 215    | 23707 | 8.1  | Ras-related protein Rab-5B                                                                                                                                                                                                                        |
| 1759 | O95563           | 3                    | 8              | 27.6                  | 127    | 14279 | 10.4 | Brain protein 44                                                                                                                                                                                                                                  |
| 1760 | Q8N111           | 3                    | 6              | 27.5                  | 149    | 14954 | 9.2  | Cell cycle exit and neuronal differentiation protein 1                                                                                                                                                                                            |
| 1761 | P62910           | 3                    | 25             | 27.4                  | 135    | 15860 | 11.3 | 60S ribosomal protein L32                                                                                                                                                                                                                         |
| 1761 | UPI0000073979    | 3                    | 25             | 27.4                  | 135    | 15751 | 10.9 | PREDICTED: similar to 60S ribosomal protein L32                                                                                                                                                                                                   |
| 1762 | P42167           | 3                    | 10             | 26.9                  | 454    | 50670 | 9.4  | Lamina-associated polypeptide 2, isoforms beta/gamma (Thymopoietin, isoforms beta/gamma) (TP beta/gamma) (Thymopoietin-related peptide isoforms beta/gamma) (TPRP isoforms beta/gamma) [Contains: Thymopoietin (TP) (Splenin); Thymopentin (TP5)] |
| 1763 | Q9Y5R8           | 3                    | 3              | 26.9                  | 145    | 16832 | 9.2  | Trafficking protein particle complex subunit 1                                                                                                                                                                                                    |
| 1764 | O75607           | 3                    | 5              | 26.4                  | 178    | 19344 | 4.6  | Nucleoplasmin-3                                                                                                                                                                                                                                   |
| 1765 | Q7Z4G1           | 3                    | 3              | 38.8                  | 85     | 9638  | 6    | COMM domain-containing protein 6                                                                                                                                                                                                                  |
| 1765 | UPI000034ECDC    | 3                    | 3              | 33.7                  | 98     | 10908 | 6    | COMM domain containing 6 isoform a                                                                                                                                                                                                                |
| 1765 | Q5TBK3           | 3                    | 3              | 26.4                  | 125    | 14211 | 9.8  | COMM domain containing 6                                                                                                                                                                                                                          |
| 1765 | UPI0000D61A83    | 3                    | 3              | 26.4                  | 125    | 14257 | 9.8  | COMM domain-containing protein 6.                                                                                                                                                                                                                 |
| 1766 | Q9Y2R0           | 3                    | 22             | 26.4                  | 106    | 11731 | 9.6  | Coiled-coil domain-containing protein 56                                                                                                                                                                                                          |
| 1767 | P60866           | 3                    | 54             | 26.1                  | 119    | 13373 | 9.9  | 40S ribosomal protein S20                                                                                                                                                                                                                         |
| 1768 | P53999           | 3                    | 26             | 26                    | 127    | 14395 | 9.6  | Activated RNA polymerase II transcriptional coactivator p15                                                                                                                                                                                       |
| 1768 | UPI000006EEEC7   | 3                    | 26             | 26                    | 127    | 14365 | 9.6  | activated RNA polymerase II transcription cofactor 4                                                                                                                                                                                              |
| 1768 | Q59G24           | 3                    | 26             | 24.6                  | 134    | 15135 | 9.4  | Activated RNA polymerase II transcription cofactor 4 variant                                                                                                                                                                                      |
| 1769 | Q9NP97           | 3                    | 12             | 39.6                  | 96     | 10922 | 7.2  | Dynein light chain roadblock-type 1                                                                                                                                                                                                               |
| 1769 | Q5TC71           | 3                    | 12             | 25.7                  | 148    | 16253 | 7    | Dynein, light chain, roadblock-type 1                                                                                                                                                                                                             |
| 1770 | Q5JW33           | 3                    | 3              | 25.4                  | 134    | 15055 | 4.6  | ASF1 anti-silencing function 1 homolog A                                                                                                                                                                                                          |
| 1770 | UPI00004153B3    | 3                    | 3              | 20.2                  | 168    | 18809 | 4.5  | ASF1 anti-silencing function 1 homolog A                                                                                                                                                                                                          |

| No.  | Accession Number | Unique Peptide Count | Spectrum Count | Sequence Coverage (%) | Length | MolWt | pI   | Descriptive Name                                                                                                            |
|------|------------------|----------------------|----------------|-----------------------|--------|-------|------|-----------------------------------------------------------------------------------------------------------------------------|
| 1770 | UPI0000F24423    | 3                    | 3              | 19.4                  | 175    | 19812 | 4.5  | ASF1A protein                                                                                                               |
| 1770 | Q9Y294           | 3                    | 3              | 16.7                  | 204    | 22969 | 4.4  | Histone chaperone ASF1A                                                                                                     |
| 1771 | O60613           | 3                    | 24             | 25.3                  | 162    | 17743 | 5    | 15 kDa selenoprotein precursor                                                                                              |
| 1771 | UPI000034ECC1    | 3                    | 24             | 24.8                  | 165    | 17942 | 5    | 15 kDa selenoprotein isoform 1 precursor                                                                                    |
| 1772 | Q7Z7H5           | 3                    | 9              | 25.1                  | 227    | 25943 | 8.3  | Transmembrane emp24 domain-containing protein 4 precursor                                                                   |
| 1772 | UPI0000D61C37    | 3                    | 9              | 24.9                  | 229    | 26170 | 8.6  | Transmembrane emp24 domain-containing protein 4 precursor.                                                                  |
| 1773 | O75348           | 3                    | 22             | 24.6                  | 118    | 13758 | 8.8  | Vacuolar ATP synthase subunit G 1                                                                                           |
| 1774 | Q9H7C9           | 3                    | 4              | 24.6                  | 122    | 13332 | 8.4  | UPF0366 protein C11orf67                                                                                                    |
| 1775 | P06703           | 3                    | 134            | 24.4                  | 90     | 10180 | 5.5  | Protein S100-A6                                                                                                             |
| 1776 | P98179           | 3                    | 66             | 24.2                  | 157    | 17170 | 8.9  | Putative RNA-binding protein 3                                                                                              |
| 1777 | Q16540           | 3                    | 14             | 24.2                  | 153    | 17781 | 9.7  | Mitochondrial 39S ribosomal protein L23                                                                                     |
| 1777 | UPI0000D62587    | 3                    | 14             | 24.2                  | 153    | 17834 | 10   | Mitochondrial 39S ribosomal protein L23 (L23mt) (MRP-L23) (L23 mitochondrial-related protein) (Ribosomal protein L23-like). |
| 1777 | UPI00001678B9    | 3                    | 14             | 24.2                  | 153    | 17811 | 9.7  | mitochondrial ribosomal protein L23                                                                                         |
| 1777 | UPI00001F9AD4    | 3                    | 14             | 22.7                  | 163    | 18530 | 10.9 | Mitochondrial 39S ribosomal protein L23 (L23mt) (MRP-L23) (L23 mitochondrial-related protein) (Ribosomal protein L23-like). |
| 1778 | Q9NWU2           | 3                    | 4              | 23.7                  | 228    | 26749 | 5    | Protein C20orf11                                                                                                            |
| 1779 | Q13405           | 3                    | 14             | 23.5                  | 166    | 19198 | 9.5  | Mitochondrial 39S ribosomal protein L49                                                                                     |
| 1780 | Q86WX3           | 3                    | 5              | 23.5                  | 136    | 15434 | 10.7 | 40S ribosomal protein S19-binding protein 1                                                                                 |
| 1781 | Q9BRJ6           | 3                    | 9              | 23.2                  | 194    | 22083 | 9.6  | MGC11257 protein                                                                                                            |
| 1782 | O60925           | 3                    | 16             | 23                    | 122    | 14210 | 6.8  | Prefoldin subunit 1                                                                                                         |
| 1783 | Q53G62           | 3                    | 8              | 23                    | 187    | 20771 | 9.3  | Mitochondrial ribosomal protein S28 variant                                                                                 |
| 1783 | Q9Y2Q9           | 3                    | 8              | 23                    | 187    | 20843 | 9.1  | Mitochondrial 28S ribosomal protein S28                                                                                     |
| 1784 | UPI0000470085    | 3                    | 5              | 32.7                  | 104    | 11447 | 10.1 | DnaJ homolog subfamily C member 15 (Methylation-controlled J protein) (MCJ).                                                |
| 1784 | Q9Y5T4           | 3                    | 5              | 22.7                  | 150    | 16383 | 10.1 | DnaJ homolog subfamily C member 15                                                                                          |
| 1785 | P30049           | 3                    | 24             | 22.6                  | 168    | 17490 | 5.5  | ATP synthase delta chain, mitochondrial precursor                                                                           |
| 1786 | Q9UI09           | 3                    | 18             | 22.8                  | 145    | 17114 | 9.6  | NADH dehydrogenase [ubiquinone] 1 alpha subcomplex subunit 12                                                               |
| 1786 | Q53XX0           | 3                    | 18             | 22.8                  | 145    | 17084 | 9.6  | 13kDa differentiation-associated protein                                                                                    |
| 1786 | Q53HG1           | 3                    | 18             | 22.6                  | 146    | 17215 | 9.6  | 13kDa differentiation-associated protein variant                                                                            |
| 1787 | O95372           | 3                    | 7              | 22.5                  | 231    | 24737 | 7.2  | Acyl-protein thioesterase 2                                                                                                 |
| 1788 | P20962           | 3                    | 50             | 22.5                  | 102    | 11530 | 4.2  | Parathymosin                                                                                                                |
| 1789 | P82930           | 3                    | 7              | 22.5                  | 218    | 25650 | 10   | Mitochondrial 28S ribosomal protein S34                                                                                     |
| 1790 | Q6IAA8           | 3                    | 12             | 22.4                  | 161    | 17745 | 5.1  | UPF0404 protein C11orf59                                                                                                    |
| 1791 | P09417           | 3                    | 5              | 22.1                  | 244    | 25789 | 7.4  | Dihydropteridine reductase                                                                                                  |
| 1791 | UPI000004C79F    | 3                    | 5              | 22.1                  | 244    | 25804 | 7.4  | quinoid dihydropteridine reductase                                                                                          |



| No.  | Accession Number | Unique Peptide Count | Spectrum Count | Sequence Coverage (%) | Length | MolWt | pI   | Descriptive Name                                                                                                                                                                                                             |
|------|------------------|----------------------|----------------|-----------------------|--------|-------|------|------------------------------------------------------------------------------------------------------------------------------------------------------------------------------------------------------------------------------|
| 1792 | Q6GMR2           | 3                    | 5              | 22.1                  | 208    | 22808 | 11   | MGC70857 protein                                                                                                                                                                                                             |
| 1792 | Q6P2Q7           | 3                    | 5              | 21.3                  | 216    | 23889 | 9.1  | Similar to RIKEN cDNA C030006K11 gene                                                                                                                                                                                        |
| 1792 | Q6P1X6           | 3                    | 5              | 21.3                  | 216    | 23875 | 9.1  | Similar to RIKEN cDNA C030006K11 gene                                                                                                                                                                                        |
| 1793 | Q9BWN5           | 3                    | 8              | 23.7                  | 224    | 23195 | 8.3  | IIVB (Bacterial acetolactate synthase)-like                                                                                                                                                                                  |
| 1793 | UPI0000456C2D    | 3                    | 8              | 23.6                  | 225    | 23392 | 8.5  | ilvB (bacterial acetolactate synthase)-like isoform 1                                                                                                                                                                        |
| 1793 | A1L0T0           | 3                    | 8              | 22                    | 241    | 25613 | 9.6  | FLJ39061 protein                                                                                                                                                                                                             |
| 1793 | Q59GP4           | 3                    | 8              | 12.4                  | 427    | 45645 | 8.9  | IIVB (Bacterial acetolactate synthase)-like isoform 1 variant                                                                                                                                                                |
| 1793 | Q99651           | 3                    | 8              | 8.4                   | 632    | 67924 | 8.1  | Acetolactate synthase homolog                                                                                                                                                                                                |
| 1793 | Q96F08           | 3                    | 8              | 8.4                   | 632    | 67869 | 8    | IIVB (Bacterial acetolactate synthase)-like                                                                                                                                                                                  |
| 1793 | O43341           | 3                    | 8              | 8.4                   | 632    | 67868 | 8.1  | IIVB-like protein                                                                                                                                                                                                            |
| 1794 | A2IDC8           | 3                    | 7              | 22                    | 168    | 18601 | 10.9 | Non-metastatic cells 4, protein expressed in                                                                                                                                                                                 |
| 1794 | O00746           | 3                    | 7              | 19.8                  | 187    | 20659 | 10.3 | Nucleoside diphosphate kinase, mitochondrial precursor                                                                                                                                                                       |
| 1794 | Q4TT34           | 3                    | 7              | 19                    | 195    | 21522 | 10.6 | Non-metastatic cells 4, protein expressed in                                                                                                                                                                                 |
| 1795 | P52434           | 3                    | 19             | 22                    | 150    | 17143 | 4.7  | DNA-directed RNA polymerases I, II, and III 17.1 kDa polypeptide                                                                                                                                                             |
| 1796 | Q9Y5J5           | 3                    | 8              | 22                    | 127    | 13891 | 9.7  | Pleckstrin homology-like domain family A member 3                                                                                                                                                                            |
| 1797 | Q8WW12           | 3                    | 8              | 21.9                  | 178    | 18925 | 7.5  | PEST proteolytic signal-containing nuclear protein                                                                                                                                                                           |
| 1798 | Q5TGM0           | 3                    | 3              | 21.7                  | 249    | 27331 | 5.2  | Chromosome 6 open reading frame 55                                                                                                                                                                                           |
| 1798 | Q9NP79           | 3                    | 3              | 17.6                  | 307    | 33879 | 6.3  | Uncharacterized protein C6orf55                                                                                                                                                                                              |
| 1798 | Q6IAE8           | 3                    | 3              | 17.6                  | 307    | 33865 | 6.3  | C6orf55 protein                                                                                                                                                                                                              |
| 1799 | P63272           | 3                    | 11             | 21.4                  | 117    | 13193 | 8.1  | Transcription elongation factor SPT4                                                                                                                                                                                         |
| 1800 | Q9HBM1           | 3                    | 4              | 21.4                  | 224    | 26153 | 8    | Kinetochore protein Spc25                                                                                                                                                                                                    |
| 1801 | Q53EQ5           | 3                    | 5              | 21.2                  | 208    | 23144 | 9    | Hypothetical protein                                                                                                                                                                                                         |
| 1801 | Q8N511           | 3                    | 5              | 21.2                  | 208    | 23130 | 9    | Uncharacterized protein C17orf32                                                                                                                                                                                             |
| 1802 | Q9Y3C6           | 3                    | 8              | 21.1                  | 166    | 18237 | 8    | Peptidyl-prolyl cis-trans isomerase-like 1                                                                                                                                                                                   |
| 1803 | P55957           | 3                    | 15             | 21                    | 195    | 21995 | 5.4  | BH3-interacting domain death agonist (BID) (p22 BID) [Contains: BH3- interacting domain death agonist p15 (p15 BID); BH3-interacting domain death agonist p13 (p13 BID); BH3-interacting domain death agonist p11 (p11 BID)] |
| 1804 | Q9Y4Z0           | 3                    | 21             | 20.9                  | 139    | 15350 | 10   | U6 snRNA-associated Sm-like protein LSm4                                                                                                                                                                                     |
| 1805 | A1XKG3           | 3                    | 5              | 20.8                  | 260    | 29544 | 6.4  | Protein kinase CDK5 splicing variant                                                                                                                                                                                         |
| 1805 | Q6IAW3           | 3                    | 5              | 18.5                  | 292    | 33288 | 7.7  | CDK5 protein                                                                                                                                                                                                                 |
| 1805 | Q00535           | 3                    | 5              | 18.5                  | 292    | 33304 | 7.7  | Cell division protein kinase 5                                                                                                                                                                                               |
| 1806 | Q9BVJ7           | 3                    | 7              | 20.7                  | 150    | 16588 | 8.2  | Dual specificity protein phosphatase 23                                                                                                                                                                                      |
| 1807 | P52298           | 3                    | 7              | 20.5                  | 156    | 18001 | 8.2  | Nuclear cap-binding protein subunit 2                                                                                                                                                                                        |
| 1808 | Q9H2H8           | 3                    | 7              | 20.5                  | 161    | 18155 | 6.8  | Peptidyl-prolyl cis-trans isomerase-like 3                                                                                                                                                                                   |

| No.  | Accession Number | Unique Peptide Count | Spectrum Count | Sequence Coverage (%) | Length | MolWt | pI   | Descriptive Name                                                                 |
|------|------------------|----------------------|----------------|-----------------------|--------|-------|------|----------------------------------------------------------------------------------|
| 1809 | Q9NR77           | 3                    | 4              | 20.5                  | 195    | 22253 | 10.6 | Peroxisomal membrane protein 2                                                   |
| 1810 | O00161-2         | 3                    | 12             | 27.2                  | 158    | 17789 | 4.7  | Isoform SNAP                                                                     |
| 1810 | O00161           | 3                    | 12             | 20.4                  | 211    | 23354 | 5    | Synaptosomal-associated protein 23                                               |
| 1811 | UPI000059DB3B    | 3                    | 7              | 20.9                  | 158    | 18342 | 7.3  | Sorting nexin-12.                                                                |
| 1811 | Q3SYF1           | 3                    | 7              | 20.4                  | 162    | 18885 | 8.4  | Sorting nexin 12                                                                 |
| 1811 | UPI0000D61D89    | 3                    | 7              | 19.2                  | 172    | 19819 | 7.8  | Sorting nexin-12.                                                                |
| 1811 | Q9UMY4           | 3                    | 7              | 19.2                  | 172    | 19730 | 7.9  | Sorting nexin-12                                                                 |
| 1812 | Q9BZX2           | 3                    | 3              | 20.3                  | 261    | 29299 | 6.7  | Uridine-cytidine kinase 2                                                        |
| 1813 | Q99627           | 3                    | 11             | 20.1                  | 209    | 23226 | 5.4  | COP9 signalosome complex subunit 8                                               |
| 1814 | Q9GZS3           | 3                    | 21             | 20                    | 305    | 33581 | 5.5  | WD repeat protein 61                                                             |
| 1815 | Q96GN0           | 3                    | 10             | 19.9                  | 181    | 21210 | 7.5  | Regulator of G-protein signalling 10                                             |
| 1816 | Q8WW59           | 3                    | 7              | 19.8                  | 207    | 23098 | 6.9  | SPRY domain-containing protein 4                                                 |
| 1816 | UPI00001418EE    | 3                    | 7              | 19.8                  | 207    | 23129 | 6.9  | SPRY domain-containing protein 4.                                                |
| 1817 | P60510           | 3                    | 9              | 19.5                  | 307    | 35080 | 5.1  | Serine/threonine-protein phosphatase 4 catalytic subunit                         |
| 1818 | Q58P21           | 3                    | 8              | 21.3                  | 188    | 20917 | 7.8  | Tissue inhibitor of metalloproteinase 1                                          |
| 1818 | P01033           | 3                    | 8              | 19.3                  | 207    | 23171 | 8.1  | Metalloproteinase inhibitor 1 precursor                                          |
| 1819 | Q7Z7H8           | 3                    | 7              | 19.2                  | 261    | 29297 | 9.6  | 39S ribosomal protein L10, mitochondrial precursor                               |
| 1819 | UPI000004FA30    | 3                    | 7              | 19.2                  | 261    | 29283 | 9.6  | mitochondrial ribosomal protein L10 isoform a                                    |
| 1819 | UPI000013DFCA    | 3                    | 7              | 18.5                  | 271    | 30307 | 9.2  | mitochondrial ribosomal protein L10 isoform b                                    |
| 1820 | Q8WVJ2           | 3                    | 5              | 19.1                  | 157    | 17676 | 5.1  | NudC domain-containing protein 2                                                 |
| 1821 | Q9NX08           | 3                    | 7              | 19.1                  | 183    | 21090 | 5.4  | COMM domain-containing protein 8                                                 |
| 1822 | P10606           | 3                    | 33             | 18.6                  | 129    | 13696 | 8.8  | Cytochrome c oxidase subunit 5B, mitochondrial precursor                         |
| 1822 | Q6FHM4           | 3                    | 33             | 18.6                  | 129    | 13705 | 8.8  | COX5B protein                                                                    |
| 1823 | P30154           | 3                    | 4              | 18.5                  | 601    | 66214 | 4.9  | Serine/threonine-protein phosphatase 2A 65 kDa regulatory subunit A beta isoform |
| 1823 | Q8NHV8           | 3                    | 4              | 16.6                  | 667    | 73585 | 5.1  | Protein phosphatase 2 (Formerly 2A), regulatory subunit A, beta isoform          |
| 1824 | Q9BRJ7           | 3                    | 6              | 18.5                  | 211    | 23338 | 8.9  | Protein syndesmos                                                                |
| 1825 | Q9NQ50           | 3                    | 9              | 18.4                  | 206    | 24490 | 9.6  | 39S ribosomal protein L40, mitochondrial precursor                               |
| 1826 | Q16629-3         | 3                    | 31             | 32.6                  | 132    | 15257 | 9.6  | Isoform 3 of Q16629                                                              |
| 1826 | Q16629-2         | 3                    | 31             | 31.9                  | 135    | 15573 | 9.8  | Isoform 2 of Q16629                                                              |
| 1826 | UPI000013D48B    | 3                    | 31             | 31.4                  | 137    | 15763 | 9.8  | Splicing factor, arginine/serine-rich 7 (Splicing factor 9G8).                   |
| 1826 | Q16629           | 3                    | 31             | 18.1                  | 238    | 27367 | 11.8 | Splicing factor, arginine/serine-rich 7                                          |
| 1827 | Q8IW87           | 3                    | 5              | 18.1                  | 227    | 24434 | 6.9  | Candidate tumor suppressor in ovarian cancer 2                                   |
| 1827 | Q8WZ82           | 3                    | 5              | 18.1                  | 227    | 24418 | 6.9  | Candidate tumor suppressor OVCA2                                                 |
| 1828 | Q14197           | 3                    | 6              | 18                    | 206    | 23630 | 10.1 | Immature colon carcinoma transcript 1 protein precursor                          |
| 1829 | Q6UW68           | 3                    | 3              | 18                    | 189    | 21198 | 8.6  | MBC3205                                                                          |
| 1830 | Q9BY32           | 3                    | 6              | 18                    | 194    | 21446 | 5.6  | Inosine triphosphate pyrophosphatase                                             |

| No.  | Accession Number | Unique Peptide Count | Spectrum Count | Sequence Coverage (%) | Length | MolWt | pI   | Descriptive Name                                                                                                                                          |
|------|------------------|----------------------|----------------|-----------------------|--------|-------|------|-----------------------------------------------------------------------------------------------------------------------------------------------------------|
| 1831 | Q9NYL4           | 3                    | 17             | 17.9                  | 201    | 22180 | 9.4  | FK506-binding protein 11 precursor                                                                                                                        |
| 1832 | Q9UBX3           | 3                    | 3              | 17.8                  | 287    | 31282 | 9.5  | Mitochondrial dicarboxylate carrier                                                                                                                       |
| 1832 | Q9UBX3-2         | 3                    | 3              | 17.2                  | 296    | 32145 | 9.3  | Isoform 2 of Q9UBX3                                                                                                                                       |
| 1833 | UPI0000D61D3B    | 3                    | 7              | 19.6                  | 179    | 20084 | 9.4  | Protein FAM121B precursor.                                                                                                                                |
| 1833 | Q9BUR5-2         | 3                    | 7              | 19.4                  | 180    | 20199 | 9.3  | Isoform 2 of Q9BUR5                                                                                                                                       |
| 1833 | Q9BUR5           | 3                    | 7              | 17.7                  | 198    | 22285 | 9.1  | Apolipoprotein O precursor                                                                                                                                |
| 1834 | Q9H0A8-2         | 3                    | 5              | 25                    | 140    | 15458 | 8.3  | Isoform 2 of Q9H0A8                                                                                                                                       |
| 1834 | Q9H0A8           | 3                    | 5              | 17.6                  | 199    | 21764 | 7.3  | COMM domain-containing protein 4                                                                                                                          |
| 1835 | P04183           | 3                    | 6              | 17.5                  | 234    | 25469 | 8.5  | Thymidine kinase, cytosolic                                                                                                                               |
| 1835 | UPI0000F58EFA    | 3                    | 6              | 17.5                  | 234    | 25354 | 8.5  | Thymidine kinase                                                                                                                                          |
| 1835 | UPI0000161B4B    | 3                    | 6              | 17.5                  | 234    | 25501 | 8.5  | thymidine kinase 1, soluble                                                                                                                               |
| 1836 | P60903           | 3                    | 62             | 17.5                  | 97     | 11203 | 7.4  | Protein S100-A10                                                                                                                                          |
| 1836 | Q6FGE5           | 3                    | 62             | 17.5                  | 97     | 11187 | 7.4  | S100A10 protein                                                                                                                                           |
| 1837 | Q9CSU2           | 3                    | 17             | 20.8                  | 259    | 28772 | 7.1  | 10 days embryo whole body cDNA, RIKEN full-length enriched library, clone:2610303K13 product:26S proteasome-associated pad1 homolog, full insert sequence |
| 1837 | O00487           | 3                    | 17             | 17.4                  | 310    | 34577 | 6.5  | 26S proteasome non-ATPase regulatory subunit 14                                                                                                           |
| 1838 | Q9BU61           | 3                    | 15             | 17.4                  | 184    | 20350 | 8.2  | Uncharacterized protein C3orf60                                                                                                                           |
| 1839 | UPI000045652F    | 3                    | 7              | 19.1                  | 188    | 20857 | 10.1 | 39S ribosomal protein L21, mitochondrial precursor (L21mt) (MRP-L21).                                                                                     |
| 1839 | Q7Z2W9           | 3                    | 7              | 17.2                  | 209    | 23159 | 9.9  | 39S ribosomal protein L21, mitochondrial precursor                                                                                                        |
| 1840 | Q9UHY7           | 3                    | 8              | 17.2                  | 261    | 28933 | 4.8  | Enolase-phosphatase E1                                                                                                                                    |
| 1841 | Q16595           | 3                    | 7              | 17.1                  | 210    | 23135 | 8.7  | Frataxin, mitochondrial precursor (Friedreich ataxia protein) (Fxn) [Contains: Frataxin intermediate form]                                                |
| 1842 | Q5TIF0           | 3                    | 10             | 17.1                  | 234    | 26761 | 5    | Syntaxin 12                                                                                                                                               |
| 1842 | Q6LEU0           | 3                    | 10             | 14.9                  | 269    | 30878 | 5.8  | STX12 protein                                                                                                                                             |
| 1842 | Q86Y82           | 3                    | 10             | 14.5                  | 276    | 31642 | 5.6  | SYNTAXIN-12                                                                                                                                               |
| 1843 | Q8N0U8           | 3                    | 38             | 17                    | 176    | 19836 | 9.1  | Vitamin K epoxide reductase complex subunit 1-like protein 1                                                                                              |
| 1844 | Q9NR45           | 3                    | 4              | 17                    | 359    | 40308 | 6.7  | Sialic acid synthase                                                                                                                                      |
| 1845 | Q6P587           | 3                    | 8              | 18.8                  | 224    | 24843 | 7.4  | Fumarylacetoacetate hydrolase domain-containing protein 1                                                                                                 |
| 1845 | A2A2C3           | 3                    | 8              | 18.6                  | 226    | 24910 | 7.7  | Fumarylacetoacetate hydrolase domain containing 1                                                                                                         |
| 1845 | A2A2C2           | 3                    | 8              | 16.9                  | 248    | 27128 | 7.7  | Fumarylacetoacetate hydrolase domain containing 1                                                                                                         |
| 1846 | Q9Y3L5           | 3                    | 8              | 16.9                  | 183    | 20745 | 4.9  | Ras-related protein Rap-2c precursor                                                                                                                      |
| 1847 | Q9Y6M9           | 3                    | 8              | 16.8                  | 179    | 21831 | 8.4  | NADH dehydrogenase [ubiquinone] 1 beta subcomplex subunit 9                                                                                               |
| 1848 | A4FVB3           | 3                    | 9              | 16.7                  | 299    | 32568 | 7.9  | SPRY4 protein                                                                                                                                             |
| 1848 | Q9C004           | 3                    | 9              | 16.7                  | 299    | 32541 | 7.9  | Sprouty homolog 4                                                                                                                                         |
| 1849 | Q14919           | 3                    | 11             | 16.6                  | 205    | 22350 | 5.2  | Dr1-associated corepressor                                                                                                                                |
| 1849 | Q14919-2         | 3                    | 11             | 16.1                  | 211    | 23148 | 5.3  | Isoform 2 of Q14919                                                                                                                                       |
| 1849 | UPI0000D62635    | 3                    | 11             | 16                    | 212    | 23205 | 5.3  | Dr1-associated corepressor (Dr1-associated protein 1) (Negative co-factor 2 alpha) (NC2 alpha).                                                           |

| No.  | Accession Number | Unique Peptide Count | Spectrum Count | Sequence Coverage (%) | Length | MolWt | pI   | Descriptive Name                                                                                                                                                              |
|------|------------------|----------------------|----------------|-----------------------|--------|-------|------|-------------------------------------------------------------------------------------------------------------------------------------------------------------------------------|
| 1850 | Q96CT7           | 3                    | 9              | 16.6                  | 223    | 25835 | 9.5  | Coiled-coil domain-containing protein 124                                                                                                                                     |
| 1851 | O75608-2         | 3                    | 15             | 17.8                  | 214    | 22875 | 6.5  | Isoform 2 of O75608                                                                                                                                                           |
| 1851 | O75608           | 3                    | 15             | 16.5                  | 230    | 24670 | 6.8  | Acyl-protein thioesterase 1                                                                                                                                                   |
| 1852 | P07305           | 3                    | 22             | 16.5                  | 194    | 20863 | 10.8 | Histone H1.0 (Histone H1(0))                                                                                                                                                  |
| 1853 | P34741           | 3                    | 18             | 16.4                  | 201    | 22174 | 4.9  | Syndecan-2 precursor                                                                                                                                                          |
| 1853 | Q6PIS6           | 3                    | 18             | 16.4                  | 201    | 22160 | 4.9  | Syndecan 2                                                                                                                                                                    |
| 1854 | Q52LJ0           | 3                    | 12             | 16.4                  | 330    | 37191 | 6.3  | Protein FAM98B                                                                                                                                                                |
| 1854 | UPI0000DA182F    | 3                    | 12             | 12.5                  | 433    | 45547 | 8.7  | family with sequence similarity 98, member B isoform 1                                                                                                                        |
| 1855 | Q53GA4           | 3                    | 6              | 16.4                  | 152    | 17092 | 9.2  | Pleckstrin homology-like domain family A member 2                                                                                                                             |
| 1856 | Q5W111-2         | 3                    | 6              | 20.4                  | 157    | 17487 | 5.9  | Isoform 2 of Q5W111                                                                                                                                                           |
| 1856 | Q5W111           | 3                    | 6              | 16.3                  | 196    | 21666 | 6.7  | Chronic lymphocytic leukemia deletion region gene 6 protein                                                                                                                   |
| 1857 | Q01081           | 3                    | 17             | 16.2                  | 240    | 27872 | 8.8  | Splicing factor U2AF 35 kDa subunit                                                                                                                                           |
| 1858 | Q9NQR4           | 3                    | 4              | 15.6                  | 276    | 30608 | 7.2  | Nit protein 2                                                                                                                                                                 |
| 1859 | UPI00006C03F3    | 3                    | 6              | 19.5                  | 241    | 27027 | 4.9  | PREDICTED: hypothetical protein                                                                                                                                               |
| 1859 | Q658P1           | 3                    | 6              | 15.5                  | 304    | 34805 | 6.6  | Hypothetical protein DKFZp666C185                                                                                                                                             |
| 1859 | UPI000013EF67    | 3                    | 6              | 15.4                  | 306    | 34925 | 6.7  | PREDICTED: hypothetical protein LOC64853                                                                                                                                      |
| 1859 | Q9H9E8           | 3                    | 6              | 15.4                  | 306    | 34951 | 6.7  | CDNA FLJ12806 fis, clone NT2RP2002235                                                                                                                                         |
| 1859 | Q96BJ3           | 3                    | 6              | 15.4                  | 306    | 35023 | 6.6  | Uncharacterized protein C1orf80                                                                                                                                               |
| 1860 | O14561           | 3                    | 22             | 15.4                  | 156    | 17417 | 4.9  | Acyl carrier protein, mitochondrial precursor                                                                                                                                 |
| 1861 | UPI0000456EE0    | 3                    | 6              | 15.9                  | 220    | 23901 | 5.4  | Ribulose-phosphate 3-epimerase (EC 5.1.3.1) (Ribulose-5-phosphate-3- epimerase).                                                                                              |
| 1861 | Q96AT9-2         | 3                    | 6              | 15.9                  | 220    | 23924 | 5.6  | Isoform 2 of Q96AT9                                                                                                                                                           |
| 1861 | Q96AT9           | 3                    | 6              | 15.4                  | 228    | 24928 | 5.6  | Ribulose-phosphate 3-epimerase                                                                                                                                                |
| 1862 | Q53HV0           | 3                    | 5              | 15.3                  | 346    | 38954 | 7.9  | SPFH domain family, member 1 variant                                                                                                                                          |
| 1863 | A0PJ79           | 3                    | 6              | 15.2                  | 302    | 34446 | 9.4  | Hypothetical protein                                                                                                                                                          |
| 1863 | UPI0000D61582    | 3                    | 6              | 15.2                  | 303    | 34492 | 8.1  | 39S ribosomal protein L1, mitochondrial precursor (L1mt) (MRP-L1).                                                                                                            |
| 1863 | Q9BYD6           | 3                    | 6              | 15.2                  | 303    | 34453 | 8.1  | 39S ribosomal protein L1, mitochondrial precursor                                                                                                                             |
| 1864 | UPI00001B2F34    | 3                    | 16             | 18                    | 150    | 16676 | 8    | ubiquitin-conjugating enzyme E2C isoform 3                                                                                                                                    |
| 1864 | O00762           | 3                    | 16             | 15.1                  | 179    | 19652 | 7.4  | Ubiquitin-conjugating enzyme E2 C                                                                                                                                             |
| 1865 | O75934           | 3                    | 5              | 15.1                  | 225    | 26131 | 5.6  | Breast carcinoma amplified sequence 2                                                                                                                                         |
| 1866 | Q8N9N7           | 3                    | 4              | 15.1                  | 239    | 26754 | 8.4  | Leucine-rich repeat-containing protein 57                                                                                                                                     |
| 1866 | UPI000006FF78    | 3                    | 4              | 15.1                  | 239    | 26740 | 8.2  | leucine rich repeat containing 57                                                                                                                                             |
| 1867 | O15305           | 3                    | 10             | 15                    | 246    | 28082 | 6.8  | Phosphomannomutase 2                                                                                                                                                          |
| 1868 | Q12974           | 3                    | 5              | 15                    | 167    | 19127 | 8.4  | Protein tyrosine phosphatase type IVA protein 2 (EC 3.1.3.48) (Protein-tyrosine phosphatase 4a2) (Protein-tyrosine phosphatase of regenerating liver 2) (PRL-2) (PTP(CAAXII)) |
| 1869 | Q08257           | 3                    | 16             | 14.9                  | 329    | 35207 | 8.4  | Quinone oxidoreductase                                                                                                                                                        |

| No.  | Accession Number | Unique Peptide Count | Spectrum Count | Sequence Coverage (%) | Length | MolWt | pI   | Descriptive Name                                                                                                         |
|------|------------------|----------------------|----------------|-----------------------|--------|-------|------|--------------------------------------------------------------------------------------------------------------------------|
| 1870 | Q5SY58           | 3                    | 3              | 14.8                  | 243    | 26326 | 6.3  | Nitrilase 1                                                                                                              |
| 1870 | Q86X76-4         | 3                    | 3              | 11.5                  | 312    | 34323 | 7.4  | Isoform 5 of Q86X76                                                                                                      |
| 1870 | Q86X76           | 3                    | 3              | 11                    | 327    | 35896 | 7.7  | Nitrilase homolog 1                                                                                                      |
| 1870 | Q86X76-3         | 3                    | 3              | 9.8                   | 367    | 40200 | 6.9  | Isoform 4 of Q86X76                                                                                                      |
| 1871 | Q9ULC3           | 3                    | 4              | 14.8                  | 237    | 26659 | 6.6  | Ras-related protein Rab-23                                                                                               |
| 1872 | P62993           | 3                    | 6              | 14.7                  | 217    | 25206 | 6.3  | Growth factor receptor-bound protein 2                                                                                   |
| 1873 | P60673           | 3                    | 12             | 14.6                  | 137    | 14596 | 9.3  | Profilin-3                                                                                                               |
| 1874 | Q9GZZ9           | 3                    | 10             | 14.6                  | 404    | 44863 | 4.8  | Ubiquitin-activating enzyme E1 domain-containing protein 1                                                               |
| 1875 | Q59FM5           | 3                    | 5              | 14.6                  | 357    | 41891 | 5.7  | Guanine nucleotide-binding protein G, alpha subunit variant                                                              |
| 1875 | P29992           | 3                    | 5              | 14.5                  | 359    | 42123 | 5.7  | Guanine nucleotide-binding protein subunit alpha-11 (G alpha-11) (Guanine nucleotide-binding protein G(y) subunit alpha) |
| 1876 | UPI0000456B12    | 3                    | 18             | 16.2                  | 197    | 22761 | 11.9 | Splicing factor, arginine/serine-rich 2 (Splicing factor SC35) (SC-35) (Splicing component, 35 kDa) (Protein PR264).     |
| 1876 | Q01130           | 3                    | 18             | 14.5                  | 221    | 25476 | 11.9 | Splicing factor, arginine/serine-rich 2                                                                                  |
| 1876 | Q53FN0           | 3                    | 18             | 14.5                  | 221    | 25502 | 11.9 | Splicing factor, arginine/serine-rich 2 variant                                                                          |
| 1877 | Q15257-3         | 3                    | 4              | 17.7                  | 294    | 33467 | 6.3  | Isoform 3 of Q15257                                                                                                      |
| 1877 | Q15257-2         | 3                    | 4              | 16.1                  | 323    | 36775 | 6.3  | Isoform 1 of Q15257                                                                                                      |
| 1877 | Q15257           | 3                    | 4              | 14.5                  | 358    | 40668 | 5.9  | Serine/threonine-protein phosphatase 2A regulatory subunit B'                                                            |
| 1878 | UPI0000161188    | 3                    | 9              | 14.6                  | 316    | 33341 | 6.8  | pyrroline-5-carboxylate reductase 1 isoform 2                                                                            |
| 1878 | P32322           | 3                    | 9              | 14.4                  | 319    | 33361 | 7.6  | Pyrroline-5-carboxylate reductase 1                                                                                      |
| 1879 | P40937           | 3                    | 6              | 14.4                  | 340    | 38497 | 7.2  | Replication factor C subunit 5                                                                                           |
| 1879 | Q6LES9           | 3                    | 6              | 14.4                  | 340    | 38397 | 6.9  | RFC5 protein                                                                                                             |
| 1879 | Q59GW7           | 3                    | 6              | 14                    | 351    | 39643 | 7.8  | Replication factor C 5 isoform 1 variant                                                                                 |
| 1880 | P82664           | 3                    | 4              | 14.4                  | 201    | 22999 | 8    | Mitochondrial 28S ribosomal protein S10                                                                                  |
| 1881 | Q13243           | 3                    | 17             | 14.3                  | 272    | 31264 | 11.6 | Splicing factor, arginine/serine-rich 5                                                                                  |
| 1882 | Q561W0           | 3                    | 5              | 14.3                  | 258    | 29642 | 8.7  | TXNDC14 protein                                                                                                          |
| 1882 | Q9Y320           | 3                    | 5              | 12.5                  | 296    | 34038 | 8.7  | CGI-31 protein                                                                                                           |
| 1882 | Q5J7Q7           | 3                    | 5              | 12.5                  | 296    | 34012 | 8.7  | Proliferation-inducing gene 26 protein                                                                                   |
| 1882 | UPI000024706C    | 3                    | 5              | 10                    | 371    | 42472 | 8.6  | Catenin delta-1 (p120 catenin) (p120(ctn)) (Cadherin-associated Src substrate) (CAS) (p120(cas)).                        |
| 1882 | Q9H3L1           | 3                    | 5              | 9.9                   | 372    | 42478 | 8.7  | My009 protein                                                                                                            |
| 1882 | Q8NBP9           | 3                    | 5              | 9.9                   | 372    | 42543 | 8.6  | Thioredoxin domain-containing protein 14                                                                                 |
| 1883 | UPI00003667A5    | 3                    | 49             | 15.7                  | 242    | 26818 | 5.1  | CD82 antigen isoform 2                                                                                                   |
| 1883 | P27701           | 3                    | 49             | 14.2                  | 267    | 29626 | 5.2  | CD82 antigen                                                                                                             |
| 1883 | Q7Z2D4           | 3                    | 49             | 14.2                  | 267    | 29611 | 5.2  | CD82 molecule                                                                                                            |
| 1883 | Q6LETO           | 3                    | 49             | 14.2                  | 267    | 29644 | 5.2  | KAI1 protein                                                                                                             |
| 1884 | P84157-2         | 3                    | 5              | 17.1                  | 170    | 17493 | 4.1  | Isoform 2 of P84157                                                                                                      |
| 1884 | P84157-3         | 3                    | 5              | 16.4                  | 177    | 18207 | 4.1  | Isoform 3 of P84157                                                                                                      |
| 1884 | P84157           | 3                    | 5              | 14.2                  | 204    | 21466 | 4.3  | Matrix-remodelling-associated protein 7                                                                                  |
| 1885 | Q53GB6           | 3                    | 6              | 14.2                  | 365    | 40954 | 8    | Actin related protein 2/3 complex subunit 1A variant                                                                     |

| No.  | Accession Number | Unique Peptide Count | Spectrum Count | Sequence Coverage (%) | Length | MolWt | pI  | Descriptive Name                                                                                                                          |
|------|------------------|----------------------|----------------|-----------------------|--------|-------|-----|-------------------------------------------------------------------------------------------------------------------------------------------|
| 1885 | Q92747           | 3                    | 6              | 14.1                  | 370    | 41569 | 8.2 | Actin-related protein 2/3 complex subunit 1A                                                                                              |
| 1886 | Q5T1C6           | 3                    | 7              | 14.2                  | 240    | 27130 | 8.3 | Thioesterase superfamily member 4                                                                                                         |
| 1886 | Q96KR2           | 3                    | 7              | 14.2                  | 240    | 27173 | 8.4 | C-terminal modulator protein                                                                                                              |
| 1887 | Q9Y316           | 3                    | 7              | 14.1                  | 297    | 33733 | 7.2 | Protein memo                                                                                                                              |
| 1887 | Q5R2V8           | 3                    | 7              | 14                    | 300    | 34294 | 7.3 | Chromosome 2 open reading frame 4 short form                                                                                              |
| 1888 | Q9Y2R9           | 3                    | 9              | 14                    | 242    | 28162 | 10  | 28S ribosomal protein S7, mitochondrial precursor                                                                                         |
| 1888 | UPI000013CBA7    | 3                    | 9              | 14                    | 242    | 28134 | 10  | 28S ribosomal protein S7, mitochondrial precursor (S7mt) (MRP-S7) (bMRP27a) (bMRP-27a).                                                   |
| 1889 | UPI00005199BA    | 3                    | 6              | 14.3                  | 342    | 37980 | 5.7 | paraoxonase 2 isoform 2                                                                                                                   |
| 1889 | Q5FBX7           | 3                    | 6              | 14.3                  | 342    | 38022 | 5.7 | Paraoxonase nirs variant 1                                                                                                                |
| 1889 | UPI00004575B2    | 3                    | 6              | 13.9                  | 352    | 38946 | 5.5 | Serum paraoxonase/arylesterase 2 (EC 3.1.1.2) (EC 3.1.8.1) (PON 2) (Serum aryldialkylphosphatase 2) (A-esterase 2) (Aromatic esterase 2). |
| 1889 | A4D1H7           | 3                    | 6              | 13.8                  | 354    | 39381 | 5.6 | Paraoxonase 2                                                                                                                             |
| 1889 | Q15165-2         | 3                    | 6              | 13.8                  | 354    | 39397 | 5.6 | Isoform 2 of Q15165                                                                                                                       |
| 1889 | Q15165           | 3                    | 6              | 13.8                  | 354    | 39398 | 5.5 | Serum paraoxonase/arylesterase 2                                                                                                          |
| 1890 | Q9UEH5           | 3                    | 18             | 14.7                  | 231    | 25430 | 7.4 | 24-kDa subunit of complex I                                                                                                               |
| 1890 | P19404           | 3                    | 18             | 13.7                  | 249    | 27392 | 8.1 | NADH dehydrogenase [ubiquinone] flavoprotein 2, mitochondrial precursor                                                                   |
| 1890 | Q6IPW4           | 3                    | 18             | 13.7                  | 249    | 27364 | 8.1 | NADH dehydrogenase (Ubiquinone) flavoprotein 2, 24kDa                                                                                     |
| 1890 | Q6IB76           | 3                    | 18             | 13.7                  | 249    | 27349 | 8.1 | NDUFV2 protein                                                                                                                            |
| 1891 | P23258           | 3                    | 6              | 13.7                  | 451    | 51170 | 6.1 | Tubulin gamma-1 chain                                                                                                                     |
| 1891 | UPI0000456AAD    | 3                    | 6              | 13.7                  | 451    | 51006 | 5.7 | Tubulin gamma-2 chain (Gamma-2 tubulin).                                                                                                  |
| 1891 | Q9NRH3           | 3                    | 6              | 13.7                  | 451    | 51092 | 5.8 | Tubulin gamma-2 chain                                                                                                                     |
| 1892 | P49841           | 3                    | 4              | 13.6                  | 420    | 46744 | 8.8 | Glycogen synthase kinase-3 beta                                                                                                           |
| 1892 | P49841-2         | 3                    | 4              | 13.2                  | 433    | 48034 | 8.8 | Isoform 2 of P49841                                                                                                                       |
| 1893 | P48163           | 3                    | 9              | 13.5                  | 572    | 64150 | 6.1 | NADP-dependent malic enzyme                                                                                                               |
| 1894 | Q6FGR9           | 3                    | 3              | 14.4                  | 229    | 25695 | 7.6 | ARHE protein                                                                                                                              |
| 1894 | Q6FGN7           | 3                    | 3              | 14.4                  | 229    | 25637 | 7.8 | ARHE protein                                                                                                                              |
| 1894 | P61587           | 3                    | 3              | 13.5                  | 244    | 27368 | 8.5 | Rho-related GTP-binding protein RhoE precursor                                                                                            |
| 1894 | UPI0000D61248    | 3                    | 3              | 13.4                  | 247    | 27782 | 8.6 | Rho-related GTP-binding protein RhoE (Rho family GTPase 3) (Rnd3) (Rho8) (MemB protein).                                                  |
| 1895 | Q9NPD3           | 3                    | 10             | 13.5                  | 245    | 26383 | 6.5 | Exosome complex exonuclease RRP41                                                                                                         |
| 1895 | UPI0000D6251B    | 3                    | 10             | 13.4                  | 247    | 26610 | 6.7 | Exosome complex exonuclease RRP41 (EC 3.1.13.-) (Ribosomal RNA- processing protein 41) (Exosome component 4) (p12A).                      |
| 1896 | Q9UPY8-2         | 3                    | 5              | 14.3                  | 266    | 30380 | 5.3 | Isoform 2 of Q9UPY8                                                                                                                       |
| 1896 | Q9UPY8           | 3                    | 5              | 13.5                  | 281    | 31982 | 5.5 | Microtubule-associated protein RP/EB family member 3                                                                                      |
| 1897 | Q567R9           | 3                    | 5              | 18.7                  | 150    | 16830 | 9.7 | CIP29 protein                                                                                                                             |

| No.  | Accession Number | Unique Peptide Count | Spectrum Count | Sequence Coverage (%) | Length | MolWt | pI   | Descriptive Name                                                                                                                                              |
|------|------------------|----------------------|----------------|-----------------------|--------|-------|------|---------------------------------------------------------------------------------------------------------------------------------------------------------------|
| 1897 | P82979           | 3                    | 5              | 13.3                  | 210    | 23671 | 6.4  | Nuclear protein Hcc-1                                                                                                                                         |
| 1898 | Q96HS1           | 3                    | 6              | 13.3                  | 255    | 28006 | 7.3  | Phosphoglycerate mutase family member 5                                                                                                                       |
| 1898 | UPI00001400B6    | 3                    | 6              | 13.3                  | 255    | 28020 | 7.3  | Bcl-XL-binding protein v68                                                                                                                                    |
| 1899 | Q5RKV6           | 3                    | 6              | 13.2                  | 272    | 28235 | 6.3  | Exosome component 6                                                                                                                                           |
| 1900 | O00764           | 3                    | 10             | 13.1                  | 312    | 35102 | 6.1  | Pyridoxal kinase                                                                                                                                              |
| 1901 | Q13630           | 3                    | 11             | 13.1                  | 321    | 35893 | 6.6  | GDP-L-fucose synthetase (EC 1.1.1.271) (Protein FX) (Red cell NADP(H)- binding protein)                                                                       |
| 1902 | P28072           | 3                    | 29             | 13                    | 239    | 25358 | 4.9  | Proteasome subunit beta type 6 precursor                                                                                                                      |
| 1903 | P32970           | 3                    | 14             | 13                    | 193    | 21118 | 8.5  | Tumor necrosis factor ligand superfamily member 7                                                                                                             |
| 1904 | Q5JW12           | 3                    | 12             | 21.4                  | 159    | 17853 | 9.9  | Mitochondrial ribosomal protein L43                                                                                                                           |
| 1904 | Q5JW13           | 3                    | 12             | 20.7                  | 164    | 18311 | 9.7  | Mitochondrial ribosomal protein L43                                                                                                                           |
| 1904 | Q5JW14           | 3                    | 12             | 20.2                  | 168    | 18657 | 8.5  | Mitochondrial ribosomal protein L43                                                                                                                           |
| 1904 | Q5JW08           | 3                    | 12             | 18.5                  | 184    | 20539 | 10.3 | Mitochondrial ribosomal protein L43                                                                                                                           |
| 1904 | UPI000013E565    | 3                    | 12             | 17.3                  | 196    | 21780 | 9.5  | 39S ribosomal protein L43, mitochondrial precursor (L43mt) (MRP-L43) (Mitochondrial ribosomal protein bMRP36a).                                               |
| 1904 | Q8N983-5         | 3                    | 12             | 17.3                  | 197    | 21881 | 9.5  | Isoform 5 of Q8N983                                                                                                                                           |
| 1904 | Q5JW09           | 3                    | 12             | 16.8                  | 202    | 22580 | 9.3  | Mitochondrial ribosomal protein L43                                                                                                                           |
| 1904 | Q8N983           | 3                    | 12             | 15.8                  | 215    | 23431 | 8.6  | 39S ribosomal protein L43, mitochondrial precursor                                                                                                            |
| 1904 | UPI0000167F88    | 3                    | 12             | 14.5                  | 235    | 25862 | 9    | mitochondrial ribosomal protein L43 isoform d                                                                                                                 |
| 1904 | Q5JW07           | 3                    | 12             | 13                    | 261    | 28676 | 8.3  | Mitochondrial ribosomal protein L43                                                                                                                           |
| 1905 | Q6DRA6           | 3                    | 32             | 15.2                  | 164    | 18018 | 10.6 | Histone H2B type 2-D                                                                                                                                          |
| 1905 | Q6DN03           | 3                    | 32             | 13                    | 193    | 21472 | 10.7 | Histone H2B type 2-C                                                                                                                                          |
| 1906 | Q9HC03           | 3                    | 7              | 13                    | 324    | 36964 | 9.3  | Dolichyl-phosphate beta-glucosyltransferase                                                                                                                   |
| 1906 | Q9Y673           | 3                    | 7              | 13                    | 324    | 36946 | 9.3  | Dolichyl-phosphate beta-glucosyltransferase                                                                                                                   |
| 1907 | O95478           | 3                    | 4              | 12.7                  | 260    | 30065 | 10.3 | TGF-beta-inducible nuclear protein 1                                                                                                                          |
| 1908 | Q05DR2           | 3                    | 4              | 12.7                  | 308    | 34755 | 9.1  | RNASEH2B protein                                                                                                                                              |
| 1908 | UPI000006CECF    | 3                    | 4              | 12.5                  | 312    | 35105 | 9.1  | deleted in lymphocytic leukemia 8                                                                                                                             |
| 1908 | Q5TBB1           | 3                    | 4              | 12.5                  | 312    | 35139 | 9.1  | Ribonuclease H2 subunit B                                                                                                                                     |
| 1908 | UPI0000246C16    | 3                    | 4              | 11.8                  | 331    | 37360 | 9    | Ribonuclease H2 subunit B (RNase H2 subunit B) (Ribonuclease HI subunit B) (Aicardi-Goutieres syndrome 2 protein) (AGS2) (Deleted in lymphocytic leukemia 8). |
| 1908 | Q8N451           | 3                    | 4              | 11.8                  | 331    | 37359 | 9.1  | RNASEH2B protein                                                                                                                                              |
| 1909 | Q8N959           | 3                    | 11             | 15.5                  | 323    | 35226 | 6.3  | CDNA FLJ38330 fis, clone FCBBF3025280, highly similar to NDRG1 PROTEIN                                                                                        |
| 1909 | Q53EU7           | 3                    | 11             | 12.7                  | 394    | 42863 | 5.8  | N-myc downstream regulated gene 1 variant                                                                                                                     |

| No.  | Accession Number | Unique Peptide Count | Spectrum Count | Sequence Coverage (%) | Length | MolWt | pI  | Descriptive Name                                                                                                                                                                                                         |
|------|------------------|----------------------|----------------|-----------------------|--------|-------|-----|--------------------------------------------------------------------------------------------------------------------------------------------------------------------------------------------------------------------------|
| 1909 | UPI0000D62506    | 3                    | 11             | 12.7                  | 394    | 42834 | 5.8 | Protein NDRG1 (N-myc downstream-regulated gene 1 protein) (Differentiation-related gene 1 protein) (DRG-1) (Reducing agents and tunicamycin-responsive protein) (RTP) (Nickel-specific induction protein Cap43) (Rit42). |
| 1909 | Q92597           | 3                    | 11             | 12.7                  | 394    | 42835 | 5.8 | Protein NDRG1                                                                                                                                                                                                            |
| 1909 | Q597H1           | 3                    | 11             | 12.7                  | 394    | 42819 | 5.8 | Transformation-related protein 14                                                                                                                                                                                        |
| 1910 | O43681           | 3                    | 4              | 12.6                  | 348    | 38793 | 4.9 | Arsenical pump-driving ATPase                                                                                                                                                                                            |
| 1910 | UPI0000D61731    | 3                    | 4              | 12.1                  | 363    | 40226 | 5.1 | Arsenical pump-driving ATPase (EC 3.6.3.16) (Arsenite-translocating ATPase) (Arsenical resistance ATPase) (Arsenite-transporting ATPase) (ARSA) (ASNA-1).                                                                |
| 1911 | O95721           | 3                    | 11             | 12.4                  | 258    | 28970 | 5.8 | Synaptosomal-associated protein 29                                                                                                                                                                                       |
| 1912 | Q8NFV4-4         | 3                    | 11             | 12.7                  | 308    | 33863 | 9.2 | Isoform 4 of Q8NFV4                                                                                                                                                                                                      |
| 1912 | Q8NFV4           | 3                    | 11             | 12.4                  | 315    | 34690 | 9.5 | Abhydrolase domain-containing protein 11                                                                                                                                                                                 |
| 1913 | Q96E11-3         | 3                    | 8              | 14.7                  | 218    | 24115 | 9.6 | Isoform 3 of Q96E11                                                                                                                                                                                                      |
| 1913 | Q96E11           | 3                    | 8              | 12.2                  | 262    | 29277 | 9.8 | Ribosome recycling factor, mitochondrial precursor                                                                                                                                                                       |
| 1914 | P11310           | 3                    | 10             | 12.1                  | 421    | 46588 | 8.4 | Medium-chain specific acyl-CoA dehydrogenase, mitochondrial precursor                                                                                                                                                    |
| 1914 | Q5T4U5           | 3                    | 10             | 11.2                  | 454    | 50271 | 7.8 | Acyl-Coenzyme A dehydrogenase, C-4 to C-12 straight chain                                                                                                                                                                |
| 1914 | Q5HYG7           | 3                    | 10             | 11.2                  | 454    | 50309 | 7.8 | Hypothetical protein DKFZp686M24262                                                                                                                                                                                      |
| 1915 | P49593           | 3                    | 8              | 12.1                  | 454    | 49831 | 5.1 | Ca(2+)/calmodulin-dependent protein kinase phosphatase                                                                                                                                                                   |
| 1915 | Q6IPC0           | 3                    | 8              | 12.1                  | 453    | 49702 | 5.1 | Protein phosphatase 1F                                                                                                                                                                                                   |
| 1916 | Q8NBZ7           | 3                    | 10             | 12.1                  | 420    | 47577 | 8.9 | UDP-glucuronic acid decarboxylase 1                                                                                                                                                                                      |
| 1916 | UPI0000D6120F    | 3                    | 10             | 12                    | 425    | 48179 | 8.9 | UDP-glucuronic acid decarboxylase 1 (EC 4.1.1.35) (UDP-glucuronate decarboxylase 1) (UGD) (UXS-1).                                                                                                                       |
| 1916 | Q8NBZ7-2         | 3                    | 10             | 12                    | 425    | 48152 | 8.9 | Isoform 2 of Q8NBZ7                                                                                                                                                                                                      |
| 1917 | UPI0000456F5C    | 3                    | 13             | 12.1                  | 314    | 35595 | 5.2 | Uncharacterized protein C20orf116 precursor.                                                                                                                                                                             |
| 1918 | Q9Y277           | 3                    | 32             | 12                    | 283    | 30659 | 8.6 | Voltage-dependent anion-selective channel protein 3                                                                                                                                                                      |
| 1918 | Q9Y277-2         | 3                    | 32             | 12                    | 284    | 30790 | 8.6 | Isoform 2 of Q9Y277                                                                                                                                                                                                      |
| 1919 | Q9Y3Q3           | 3                    | 5              | 12                    | 217    | 24777 | 5.6 | Transmembrane emp24 domain-containing protein 3 precursor                                                                                                                                                                |
| 1920 | A1JUI9           | 3                    | 3              | 11.9                  | 505    | 54843 | 7.9 | WASL protein                                                                                                                                                                                                             |
| 1920 | O00401           | 3                    | 3              | 11.9                  | 505    | 54827 | 7.9 | Neural Wiskott-Aldrich syndrome protein                                                                                                                                                                                  |
| 1921 | P05026-2         | 3                    | 13             | 12                    | 301    | 34893 | 8.6 | Isoform 2 of P05026                                                                                                                                                                                                      |
| 1921 | P05026           | 3                    | 13             | 11.9                  | 303    | 35061 | 8.5 | Sodium/potassium-transporting ATPase subunit beta-1                                                                                                                                                                      |
| 1921 | Q6LEU2           | 3                    | 13             | 11.9                  | 303    | 35049 | 8.5 | ATP1B1 protein                                                                                                                                                                                                           |



| No.  | Accession Number | Unique Peptide Count | Spectrum Count | Sequence Coverage (%) | Length | MolWt  | pI   | Descriptive Name                                                                                         |
|------|------------------|----------------------|----------------|-----------------------|--------|--------|------|----------------------------------------------------------------------------------------------------------|
| 1921 | UPI0000D6203C    | 3                    | 13             | 11.8                  | 305    | 35246  | 8.5  | Sodium/potassium-transporting ATPase subunit beta-1 (Sodium/potassium- dependent ATPase beta-1 subunit). |
| 1922 | Q96D15           | 3                    | 9              | 11.9                  | 328    | 37493  | 4.9  | Reticulocalbin-3 precursor                                                                               |
| 1923 | Q9NPL8           | 3                    | 6              | 11.6                  | 285    | 32178  | 8.5  | Uncharacterized protein C3orf1                                                                           |
| 1924 | Q9UNE7           | 3                    | 4              | 11.6                  | 303    | 34856  | 5.9  | STIP1 homology and U box-containing protein 1                                                            |
| 1925 | Q8WXX5           | 3                    | 5              | 11.5                  | 260    | 29910  | 5.7  | DnaJ homolog subfamily C member 9                                                                        |
| 1926 | UPI000049E0CA    | 3                    | 13             | 12.2                  | 229    | 24770  | 7.9  | Collagen triple helix repeat-containing protein 1 precursor (NMTC1 protein).                             |
| 1926 | Q96CG8           | 3                    | 13             | 11.5                  | 243    | 26224  | 8    | Collagen triple helix repeat-containing protein 1 precursor                                              |
| 1927 | Q96GK7           | 3                    | 4              | 11.5                  | 314    | 34596  | 8.2  | Fumarylacetoacetate hydrolase domain-containing protein 2A                                               |
| 1927 | Q9Y3B0           | 3                    | 4              | 11.5                  | 314    | 34582  | 8.2  | CGI-105 protein                                                                                          |
| 1928 | O14656           | 3                    | 8              | 11.4                  | 332    | 37809  | 7    | Torsin A precursor                                                                                       |
| 1928 | UPI00004577BB    | 3                    | 8              | 11.4                  | 332    | 37812  | 7.2  | Torsin A precursor (Torsin family 1 member A) (Dystonia 1 protein).                                      |
| 1929 | Q00059           | 3                    | 5              | 11.4                  | 246    | 29097  | 9.7  | Transcription factor A, mitochondrial precursor                                                          |
| 1929 | Q6LES8           | 3                    | 5              | 11.4                  | 246    | 29083  | 9.7  | TFAM protein                                                                                             |
| 1930 | Q53FU2           | 3                    | 4              | 11.4                  | 342    | 36751  | 5.2  | Methylosome protein 50 variant                                                                           |
| 1930 | Q9BQA1           | 3                    | 4              | 11.4                  | 342    | 36724  | 5.2  | Methylosome protein 50                                                                                   |
| 1931 | Q5HYI8           | 3                    | 10             | 11.4                  | 236    | 26423  | 7.1  | Rab-like protein 3                                                                                       |
| 1931 | Q8WUD3           | 3                    | 10             | 11.4                  | 236    | 26308  | 6.8  | RAB, member of RAS oncogene family-like 3                                                                |
| 1932 | Q14151           | 3                    | 6              | 11.3                  | 953    | 107474 | 6.2  | Scaffold attachment factor B2                                                                            |
| 1933 | Q8NFK8           | 3                    | 13             | 11.3                  | 470    | 51263  | 5    | Torsin-1A-interacting protein 2                                                                          |
| 1934 | O96011           | 3                    | 8              | 11.2                  | 259    | 28431  | 9.8  | Peroxisomal membrane protein 11B                                                                         |
| 1935 | Q8N5M1           | 3                    | 3              | 11.1                  | 289    | 32772  | 7.1  | ATP synthase mitochondrial F1 complex assembly factor 2, mitochondrial precursor                         |
| 1935 | UPI0000456A37    | 3                    | 3              | 11                    | 290    | 32882  | 7.5  | ATP synthase mitochondrial F1 complex assembly factor 2, mitochondrial precursor (ATP12 homolog).        |
| 1936 | Q99848           | 3                    | 6              | 11.1                  | 306    | 34852  | 10.1 | Probable rRNA-processing protein EBP2                                                                    |
| 1936 | UPI0000129B3E    | 3                    | 6              | 11.1                  | 306    | 34820  | 10.1 | EBNA1 binding protein 2                                                                                  |
| 1937 | Q9NX58           | 3                    | 9              | 11.1                  | 379    | 43615  | 9.5  | Cell growth-regulating nucleolar protein                                                                 |
| 1937 | UPI0000037C40    | 3                    | 9              | 11.1                  | 379    | 43634  | 9.6  | hypothetical protein FLJ20425                                                                            |
| 1938 | UPI0000F2442B    | 3                    | 8              | 13.8                  | 195    | 22469  | 9.4  | EUKARYOTIC TRANSLATION INITIATION FACTOR 4E T                                                            |
| 1938 | Q59FE1           | 3                    | 8              | 11.1                  | 243    | 27829  | 7.5  | Eukaryotic translation initiation factor 4E member 2 variant                                             |
| 1938 | O60573           | 3                    | 8              | 11                    | 245    | 28362  | 8.9  | Eukaryotic translation initiation factor 4E type 2                                                       |

| No.  | Accession Number | Unique Peptide Count | Spectrum Count | Sequence Coverage (%) | Length | MolWt  | pI   | Descriptive Name                                                                                                                                                                                                                                                |
|------|------------------|----------------------|----------------|-----------------------|--------|--------|------|-----------------------------------------------------------------------------------------------------------------------------------------------------------------------------------------------------------------------------------------------------------------|
| 1938 | UPI0000D612CB    | 3                    | 8              | 10.6                  | 255    | 29289  | 8    | Eukaryotic translation initiation factor 4E type 2 (eIF4E type 2) (eIF-4E type 2) (mRNA cap-binding protein type 3) (Eukaryotic translation initiation factor 4E-like 3) (Eukaryotic translation initiation factor 4E homologous protein) (mRNA cap-binding pro |
| 1939 | P13995           | 3                    | 12             | 10.9                  | 350    | 37895  | 8.7  | Bifunctional methylenetetrahydrofolate dehydrogenase/cyclohydrolase, mitochondrial precursor [Includes: NAD-dependent methylenetetrahydrofolate dehydrogenase (EC 1.5.1.15); Methenyltetrahydrofolate cyclohydrolase (EC 3.5.4.9)]                              |
| 1940 | Q13572           | 3                    | 4              | 10.9                  | 414    | 45621  | 6.2  | Inositol-tetrakisphosphate 1-kinase (EC 2.7.1.134) (Inositol-triphosphate 5/6-kinase) (EC 2.7.1.159) (Inositol 1,3,4-trisphosphate 5/6-kinase) (Ins(1,3,4)P(3) 5/6-kinase)                                                                                      |
| 1941 | Q99536           | 3                    | 4              | 10.9                  | 393    | 41920  | 6.3  | Synaptic vesicle membrane protein VAT-1 homolog                                                                                                                                                                                                                 |
| 1942 | Q9H1E5           | 3                    | 10             | 10.9                  | 349    | 38952  | 4.4  | Thioredoxin domain-containing protein 13 precursor                                                                                                                                                                                                              |
| 1943 | Q14192           | 3                    | 11             | 10.8                  | 279    | 32193  | 7.5  | Four and a half LIM domains protein 2                                                                                                                                                                                                                           |
| 1943 | Q2TSB7           | 3                    | 11             | 10.8                  | 279    | 32246  | 7.7  | Aging-associated gene 11                                                                                                                                                                                                                                        |
| 1943 | UPI000023C3A9    | 3                    | 11             | 8.1                   | 372    | 42073  | 8    | Four and a half LIM domains protein 2 (FHL-2) (Skeletal muscle LIM- protein 3) (SLIM 3) (LIM domain protein DRAL).                                                                                                                                              |
| 1943 | Q2XQU9           | 3                    | 11             | 7.7                   | 389    | 44177  | 8.1  | FHL2 isoform 5                                                                                                                                                                                                                                                  |
| 1944 | Q96EP5           | 3                    | 6              | 10.8                  | 407    | 43383  | 8.6  | DAZ-associated protein 1                                                                                                                                                                                                                                        |
| 1945 | UPI0000D61DD0    | 3                    | 5              | 11.1                  | 1005   | 117261 | 8    | Probable global transcription activator SNF2L1 (EC 3.6.1.-) (Nucleosome remodeling factor subunit SNF2L) (ATP-dependent helicase SMARCA1) (SWI/SNF-related matrix-associated actin-dependent regulator of chromatin subfamily A member 1).                      |
| 1945 | Q5JZ57           | 3                    | 5              | 11.1                  | 1005   | 117265 | 7.8  | SWI/SNF related, matrix associated, actin dependent regulator of chromatin, subfamily a, member 1                                                                                                                                                               |
| 1945 | P28370-2         | 3                    | 5              | 10.7                  | 1042   | 121142 | 8.2  | Isoform 2 of P28370                                                                                                                                                                                                                                             |
| 1945 | P28370           | 3                    | 5              | 10.6                  | 1054   | 122605 | 8.1  | Probable global transcription activator SNF2L1                                                                                                                                                                                                                  |
| 1946 | P82914           | 3                    | 4              | 10.5                  | 257    | 29842  | 10.5 | 28S ribosomal protein S15, mitochondrial precursor                                                                                                                                                                                                              |
| 1947 | Q8TC12           | 3                    | 7              | 10.4                  | 318    | 35386  | 8.8  | Retinol dehydrogenase 11                                                                                                                                                                                                                                        |

| No.  | Accession Number | Unique Peptide Count | Spectrum Count | Sequence Coverage (%) | Length | MolWt | pI   | Descriptive Name                                                                                                                                                                                                   |
|------|------------------|----------------------|----------------|-----------------------|--------|-------|------|--------------------------------------------------------------------------------------------------------------------------------------------------------------------------------------------------------------------|
| 1947 | UPI0000D6241F    | 3                    | 7              | 10.4                  | 318    | 35415 | 8.9  | Retinol dehydrogenase 11 (EC 1.1.1.-) (Retinal reductase 1) (RalR1) (Prostate short-chain dehydrogenase/reductase 1) (Androgen-regulated short-chain dehydrogenase/reductase 1) (HCV core-binding protein HCBP12). |
| 1947 | UPI0000070F53    | 3                    | 7              | 10.4                  | 318    | 35414 | 8.8  | androgen-regulated short-chain dehydrogenase/reductase 1                                                                                                                                                           |
| 1948 | O43488           | 3                    | 12             | 10.3                  | 359    | 39589 | 7.2  | Aflatoxin B1 aldehyde reductase member 2                                                                                                                                                                           |
| 1949 | O95400           | 3                    | 3              | 10.3                  | 341    | 37646 | 4.6  | CD2 antigen cytoplasmic tail-binding protein 2                                                                                                                                                                     |
| 1950 | P35250-2         | 3                    | 9              | 11.2                  | 320    | 35244 | 5.5  | Isoform 2 of P35250                                                                                                                                                                                                |
| 1950 | P35250           | 3                    | 9              | 10.2                  | 354    | 39157 | 6.4  | Replication factor C subunit 2                                                                                                                                                                                     |
| 1951 | Q8IZ81           | 3                    | 10             | 10.2                  | 293    | 34961 | 8.1  | ELMO domain-containing protein 2                                                                                                                                                                                   |
| 1952 | P20645           | 3                    | 12             | 10.1                  | 277    | 30993 | 5.8  | Cation-dependent mannose-6-phosphate receptor precursor                                                                                                                                                            |
| 1952 | Q6I9U3           | 3                    | 12             | 10.1                  | 277    | 30975 | 5.8  | M6PR protein                                                                                                                                                                                                       |
| 1952 | Q53GY9           | 3                    | 12             | 10.1                  | 277    | 31019 | 5.8  | Cation-dependent mannose-6-phosphate receptor variant                                                                                                                                                              |
| 1953 | Q10588           | 3                    | 3              | 10.1                  | 318    | 35724 | 7.8  | ADP-ribosyl cyclase 2 precursor                                                                                                                                                                                    |
| 1953 | UPI0000126AFB    | 3                    | 3              | 10.1                  | 318    | 35738 | 7.8  | bone marrow stromal cell antigen 1 precursor                                                                                                                                                                       |
| 1953 | UPI000066D9E4    | 3                    | 3              | 9.6                   | 333    | 37482 | 8    | ADP-ribosyl cyclase 2 precursor (EC 3.2.2.5) (Cyclic ADP-ribose hydrolase 2) (cADPr hydrolase 2) (Bone marrow stromal antigen 1) (BST- 1) (CD157 antigen).                                                         |
| 1954 | UPI000045619C    | 3                    | 5              | 11.9                  | 370    | 38212 | 4.6  | Syndecan-3 (SYND3).                                                                                                                                                                                                |
| 1954 | O75056-2         | 3                    | 5              | 11.9                  | 370    | 38246 | 4.6  | Isoform 3 of O75056                                                                                                                                                                                                |
| 1954 | O75056-1         | 3                    | 5              | 11.5                  | 384    | 39636 | 4.6  | Isoform 2 of O75056                                                                                                                                                                                                |
| 1954 | O75056           | 3                    | 5              | 10                    | 442    | 45497 | 4.7  | Syndecan-3                                                                                                                                                                                                         |
| 1954 | UPI000006FA8A    | 3                    | 5              | 10                    | 442    | 45496 | 4.7  | syndecan 3                                                                                                                                                                                                         |
| 1954 | UPI0000DD798E    | 3                    | 5              | 9.4                   | 467    | 49600 | 4.9  | PREDICTED: similar to syndecan 3 isoform 2                                                                                                                                                                         |
| 1955 | Q969X5-2         | 3                    | 11             | 14.6                  | 198    | 22160 | 9.1  | Isoform 2 of Q969X5                                                                                                                                                                                                |
| 1955 | Q969X5           | 3                    | 11             | 10                    | 290    | 32592 | 7.1  | Endoplasmic reticulum-Golgi intermediate compartment protein 1                                                                                                                                                     |
| 1956 | Q92905           | 3                    | 7              | 9.9                   | 334    | 37579 | 6.5  | COP9 signalosome complex subunit 5                                                                                                                                                                                 |
| 1957 | Q14232           | 3                    | 5              | 9.8                   | 305    | 33712 | 7.3  | Translation initiation factor eIF-2B subunit alpha                                                                                                                                                                 |
| 1957 | UPI00004566B0    | 3                    | 5              | 9.8                   | 305    | 33648 | 6.9  | Translation initiation factor eIF-2B subunit alpha (eIF-2B GDP-GTP exchange factor subunit alpha).                                                                                                                 |
| 1958 | Q5VT94           | 3                    | 18             | 9.8                   | 325    | 35282 | 10.1 | Growth hormone inducible transmembrane protein                                                                                                                                                                     |
| 1958 | UPI0000D60F83    | 3                    | 18             | 9.8                   | 325    | 35169 | 10.1 | Growth hormone-inducible transmembrane protein (Dermal papilla-derived protein 2) (Transmembrane BAX inhibitor motif-containing protein 5).                                                                        |
| 1958 | Q9H3K2           | 3                    | 18             | 9.3                   | 345    | 37205 | 9.9  | Growth hormone-inducible transmembrane protein                                                                                                                                                                     |

| No.  | Accession Number | Unique Peptide Count | Spectrum Count | Sequence Coverage (%) | Length | MolWt | pI  | Descriptive Name                                                                                                                                                       |
|------|------------------|----------------------|----------------|-----------------------|--------|-------|-----|------------------------------------------------------------------------------------------------------------------------------------------------------------------------|
| 1958 | Q6FIA7           | 3                    | 18             | 9.3                   | 345    | 37279 | 10  | GHITM protein                                                                                                                                                          |
| 1959 | Q6PIU2           | 3                    | 19             | 9.8                   | 408    | 45808 | 7.2 | Arylacetamide deacetylase-like 1                                                                                                                                       |
| 1959 | UPI0000050344    | 3                    | 19             | 9.1                   | 440    | 49063 | 7.9 | arylacetamide deacetylase-like 1                                                                                                                                       |
| 1960 | Q59EQ4           | 3                    | 3              | 17.6                  | 262    | 29663 | 6.8 | Serine palmitoyltransferase subunit 1 isoform a variant                                                                                                                |
| 1960 | O15269           | 3                    | 3              | 9.7                   | 473    | 52744 | 6   | Serine palmitoyltransferase 1                                                                                                                                          |
| 1960 | Q6NUL7           | 3                    | 3              | 9                     | 513    | 57396 | 7.5 | SPTLC1 protein                                                                                                                                                         |
| 1961 | Q14914           | 3                    | 6              | 9.7                   | 329    | 35870 | 8.3 | NADP-dependent leukotriene B4 12-hydroxydehydrogenase                                                                                                                  |
| 1961 | UPI0000074210    | 3                    | 6              | 9.7                   | 329    | 35886 | 8.3 | NADP-dependent leukotriene B4 12-hydroxydehydrogenase                                                                                                                  |
| 1962 | Q8WVY7           | 3                    | 3              | 9.7                   | 318    | 36805 | 6.5 | Ubiquitin-like domain-containing CTD phosphatase 1                                                                                                                     |
| 1962 | UPI000007368C    | 3                    | 3              | 9.7                   | 318    | 36733 | 6.7 | ubiquitin-like domain containing CTD phosphatase 1                                                                                                                     |
| 1963 | Q96KP4           | 3                    | 4              | 9.7                   | 475    | 52878 | 6   | Cytosolic nonspecific dipeptidase                                                                                                                                      |
| 1963 | UPI0000D60EF3    | 3                    | 4              | 9.7                   | 475    | 52897 | 6   | Cytosolic nonspecific dipeptidase (Glutamate carboxypeptidase-like protein 1) (CNDP dipeptidase 2).                                                                    |
| 1963 | UPI0000049A46    | 3                    | 4              | 9.7                   | 475    | 52779 | 5.9 | CNDP dipeptidase 2 (metallopeptidase M20 family)                                                                                                                       |
| 1964 | Q5T7G5           | 3                    | 4              | 9.6                   | 324    | 35189 | 6.7 | Phosphoserine aminotransferase 1                                                                                                                                       |
| 1964 | Q9Y617           | 3                    | 4              | 8.4                   | 370    | 40423 | 7.7 | Phosphoserine aminotransferase                                                                                                                                         |
| 1965 | P30566           | 3                    | 6              | 9.5                   | 484    | 54889 | 7.1 | Adenylosuccinate lyase                                                                                                                                                 |
| 1965 | Q71UA4           | 3                    | 6              | 9.5                   | 484    | 54871 | 7.1 | Adenylosuccinate lyase                                                                                                                                                 |
| 1966 | Q99816           | 3                    | 6              | 9.5                   | 390    | 43944 | 6.4 | Tumor susceptibility gene 101 protein                                                                                                                                  |
| 1967 | O00151           | 3                    | 11             | 9.4                   | 329    | 36072 | 7   | PDZ and LIM domain protein 1                                                                                                                                           |
| 1968 | O75787           | 3                    | 6              | 9.4                   | 350    | 39008 | 6.1 | Renin receptor precursor (Renin/prorenin receptor) (ATPase H(+)-transporting lysosomal accessory protein 2) (ATPase H(+)-transporting lysosomal-interacting protein 2) |
| 1969 | O96008-2         | 3                    | 10             | 10.3                  | 329    | 34441 | 7.2 | Isoform 2 of O96008                                                                                                                                                    |
| 1969 | O96008           | 3                    | 10             | 9.4                   | 361    | 37893 | 7.3 | Probable mitochondrial import receptor subunit TOM40 homolog                                                                                                           |
| 1970 | P31321           | 3                    | 7              | 9.4                   | 381    | 43158 | 5.8 | cAMP-dependent protein kinase type I-beta regulatory subunit                                                                                                           |
| 1970 | UPI0000DD7E3F    | 3                    | 7              | 9.4                   | 381    | 43011 | 5.7 | PREDICTED: similar to protein kinase, cAMP-dependent, regulatory, type I, beta                                                                                         |
| 1970 | Q8N422           | 3                    | 7              | 9.4                   | 381    | 43073 | 5.7 | Protein kinase, cAMP-dependent, regulatory, type I, beta                                                                                                               |
| 1971 | Q8N367           | 3                    | 7              | 17.4                  | 213    | 23600 | 4.8 | HS1BP3 protein                                                                                                                                                         |
| 1971 | UPI000013CA23    | 3                    | 7              | 12.3                  | 302    | 32835 | 5.4 | HCLS1 binding protein 3                                                                                                                                                |
| 1971 | Q9H7U7           | 3                    | 7              | 12.3                  | 302    | 32888 | 6.1 | CDNA FLJ14249 fis, clone OVARC1001200, weakly similar to Mus musculus HS1 binding protein 3                                                                            |
| 1971 | Q53T59           | 3                    | 7              | 9.4                   | 392    | 42780 | 5   | HCLS1-binding protein 3                                                                                                                                                |
| 1971 | Q86VC2           | 3                    | 7              | 9.4                   | 392    | 42842 | 5   | HCLS1 binding protein 3                                                                                                                                                |
| 1972 | Q9NP81           | 3                    | 3              | 9.3                   | 518    | 58283 | 8.1 | Seryl-tRNA synthetase, mitochondrial precursor                                                                                                                         |

| No.  | Accession Number | Unique Peptide Count | Spectrum Count | Sequence Coverage (%) | Length | MolWt | pI  | Descriptive Name                                                                                                                                                               |
|------|------------------|----------------------|----------------|-----------------------|--------|-------|-----|--------------------------------------------------------------------------------------------------------------------------------------------------------------------------------|
| 1972 | UPI0000456CB2    | 3                    | 3              | 9.3                   | 518    | 58182 | 8.3 | Seryl-tRNA synthetase, mitochondrial precursor (EC 6.1.1.11) (Serine-- tRNA ligase) (SerRSmt).                                                                                 |
| 1973 | P53985           | 3                    | 4              | 9                     | 500    | 53958 | 8.7 | Monocarboxylate transporter 1                                                                                                                                                  |
| 1974 | Q6NVY7           | 3                    | 12             | 8.9                   | 359    | 38724 | 6.4 | Inositol monophosphatase domain-containing protein 1                                                                                                                           |
| 1974 | Q9NX62           | 3                    | 12             | 8.9                   | 359    | 38681 | 6.9 | CDNA FLJ20421 fis, clone KAT02467                                                                                                                                              |
| 1975 | UPI0000D6159B    | 3                    | 9              | 9.5                   | 515    | 56404 | 5.4 | Rap1 GTPase-GDP dissociation stimulator 1 (SMG P21 stimulatory GDP/GTP exchange protein) (SMG GDS protein) (Exchange factor smgGDS).                                           |
| 1975 | Q6U7G8           | 3                    | 9              | 9.5                   | 516    | 56488 | 5.4 | GTP-GDP dissociation stimulator 1 isoform A                                                                                                                                    |
| 1975 | Q499L7           | 3                    | 9              | 8.8                   | 559    | 61108 | 5.4 | RAP1GDS1 protein                                                                                                                                                               |
| 1975 | Q4KMV2           | 3                    | 9              | 8.8                   | 558    | 61037 | 5.4 | RAP1GDS1 protein                                                                                                                                                               |
| 1975 | UPI000004A01F    | 3                    | 9              | 8.1                   | 608    | 66388 | 5.3 | Rap1 GTPase-GDP dissociation stimulator 1 (SMG P21 stimulatory GDP/GTP exchange protein) (SMG GDS protein) (Exchange factor smgGDS).                                           |
| 1975 | Q9BUX6           | 3                    | 9              | 8.1                   | 607    | 66331 | 5.3 | RAP1, GTP-GDP dissociation stimulator 1                                                                                                                                        |
| 1975 | Q4QQI8           | 3                    | 9              | 8.1                   | 608    | 66316 | 5.4 | RAP1, GTP-GDP dissociation stimulator 1                                                                                                                                        |
| 1976 | O94766           | 3                    | 6              | 8.7                   | 335    | 37122 | 8.3 | Galactosylgalactosylxylosylprotein 3-beta-glucuronosyltransferase 3                                                                                                            |
| 1976 | Q5U676           | 3                    | 6              | 8.5                   | 341    | 37828 | 8.6 | B3GAT3 protein                                                                                                                                                                 |
| 1977 | P30533           | 3                    | 13             | 8.7                   | 357    | 41466 | 8.8 | Alpha-2-macroglobulin receptor-associated protein precursor                                                                                                                    |
| 1978 | UPI0000470A40    | 3                    | 4              | 11.7                  | 274    | 30220 | 5.1 | NSFL1 cofactor p47 (p97 cofactor p47).                                                                                                                                         |
| 1978 | Q5JXA4           | 3                    | 4              | 9.4                   | 339    | 37325 | 5.1 | NSFL1 (P97) cofactor                                                                                                                                                           |
| 1978 | Q53FE8           | 3                    | 4              | 8.6                   | 370    | 40572 | 5.1 | P47 protein isoform a variant                                                                                                                                                  |
| 1978 | Q9UNZ2           | 3                    | 4              | 8.6                   | 370    | 40573 | 5.1 | NSFL1 cofactor p47                                                                                                                                                             |
| 1978 | Q5JXA5           | 3                    | 4              | 8.6                   | 372    | 40816 | 5.1 | NSFL1 (P97) cofactor                                                                                                                                                           |
| 1978 | Q53FF5           | 3                    | 4              | 8.6                   | 370    | 40500 | 5.2 | P47 protein isoform a variant                                                                                                                                                  |
| 1979 | Q8WWH5           | 3                    | 3              | 8.6                   | 349    | 37253 | 8.3 | Probable tRNA pseudouridine synthase 1                                                                                                                                         |
| 1980 | Q9Y5A9-2         | 3                    | 4              | 9.5                   | 529    | 56877 | 8.9 | Isoform 2 of Q9Y5A9                                                                                                                                                            |
| 1980 | UPI0000456197    | 3                    | 4              | 8.8                   | 569    | 61192 | 9.1 | YTH domain family protein 2 (High-glucose-regulated protein 8) (CLL-associated antigen KW-14) (Renal carcinoma antigen NY-REN-2).                                              |
| 1980 | Q9Y5A9           | 3                    | 4              | 8.6                   | 579    | 62334 | 8.8 | YTH domain family protein 2                                                                                                                                                    |
| 1981 | P14324           | 3                    | 7              | 8.5                   | 353    | 40532 | 5.2 | Farnesyl pyrophosphate synthetase (FPP synthetase) (FPS) (Farnesyl diphosphate synthetase) [Includes: Dimethylallyltransferase (EC 2.5.1.1); Geranyltransferase (EC 2.5.1.10)] |
| 1982 | Q7Z3B4-2         | 3                    | 4              | 14.8                  | 291    | 33180 | 6.4 | Isoform 2 of Q7Z3B4                                                                                                                                                            |
| 1982 | Q53H29           | 3                    | 4              | 8.5                   | 508    | 55564 | 7   | Nucleoporin 54kDa variant                                                                                                                                                      |
| 1982 | Q7Z3B4           | 3                    | 4              | 8.5                   | 507    | 55436 | 7   | Nucleoporin p54                                                                                                                                                                |
| 1983 | Q7L5N2           | 3                    | 15             | 8.5                   | 471    | 52634 | 9   | LENG4 protein                                                                                                                                                                  |

| No.  | Accession Number | Unique Peptide Count | Spectrum Count | Sequence Coverage (%) | Length | MolWt | pI   | Descriptive Name                                                                                     |
|------|------------------|----------------------|----------------|-----------------------|--------|-------|------|------------------------------------------------------------------------------------------------------|
| 1983 | Q9BPV2           | 3                    | 15             | 8.5                   | 472    | 52765 | 9    | Leukocyte receptor cluster (LRC) member 4                                                            |
| 1983 | Q96N66           | 3                    | 15             | 8.5                   | 472    | 52775 | 9    | Leukocyte receptor cluster member 4                                                                  |
| 1984 | Q96CS3           | 3                    | 4              | 8.3                   | 445    | 52624 | 5.6  | UBX domain-containing protein 8                                                                      |
| 1985 | Q9NR56-3         | 3                    | 8              | 9.3                   | 302    | 33050 | 8.8  | Isoform EXP35 of Q9NR56                                                                              |
| 1985 | Q96RE3           | 3                    | 8              | 8.9                   | 314    | 34211 | 8.8  | 36 kDa muscleblind protein EXP36                                                                     |
| 1985 | Q86UV8           | 3                    | 8              | 8.2                   | 342    | 37074 | 8.6  | Muscleblind-like protein EXP41s                                                                      |
| 1985 | UPI0000246E53    | 3                    | 8              | 8.2                   | 340    | 36992 | 8.6  | muscleblind-like 1 isoform f                                                                         |
| 1985 | Q86UV9           | 3                    | 8              | 8.2                   | 341    | 37063 | 8.6  | Muscleblind-like protein EXP40s                                                                      |
| 1985 | Q9NR56-2         | 3                    | 8              | 7.6                   | 370    | 39831 | 8.8  | Isoform EXP40 of Q9NR56                                                                              |
| 1985 | Q96P92           | 3                    | 8              | 7.3                   | 382    | 40992 | 8.7  | Muscleblind 41kD isoform                                                                             |
| 1985 | Q9NR56           | 3                    | 8              | 7.2                   | 388    | 41817 | 8.9  | Muscleblind-like protein 1                                                                           |
| 1986 | Q9BTV4           | 3                    | 18             | 8.2                   | 400    | 44876 | 8.1  | Transmembrane protein 43                                                                             |
| 1987 | O00425           | 3                    | 9              | 8.1                   | 579    | 63720 | 8.9  | Insulin-like growth factor 2 mRNA-binding protein 3                                                  |
| 1987 | UPI0000D61C0E    | 3                    | 9              | 8.1                   | 583    | 64160 | 9    | insulin-like growth factor 2 mRNA binding protein 3                                                  |
| 1987 | UPI0000117172    | 3                    | 9              | 8.1                   | 579    | 63705 | 8.9  | insulin-like growth factor 2 mRNA binding protein 3                                                  |
| 1988 | Q53XA7           | 3                    | 3              | 9.7                   | 349    | 38614 | 7.2  | Hypothetical protein DKFZp686F13224                                                                  |
| 1988 | P16930           | 3                    | 3              | 8.1                   | 419    | 46374 | 6.9  | Fumarylacetoacetase                                                                                  |
| 1989 | Q05BU6           | 3                    | 8              | 15.9                  | 246    | 24847 | 6.3  | Hypothetical protein                                                                                 |
| 1989 | Q6PJY9           | 3                    | 8              | 15.8                  | 247    | 24976 | 6.8  | SFRS11 protein                                                                                       |
| 1989 | Q6PKC9           | 3                    | 8              | 12.1                  | 321    | 34277 | 11.5 | SFRS11 protein                                                                                       |
| 1989 | Q5T760           | 3                    | 8              | 10                    | 389    | 42316 | 11.7 | Splicing factor, arginine/serine-rich 11                                                             |
| 1989 | Q6PJB9           | 3                    | 8              | 9.9                   | 394    | 42957 | 11.7 | SFRS11 protein                                                                                       |
| 1989 | Q05519           | 3                    | 8              | 8.1                   | 484    | 53542 | 10.5 | Splicing factor arginine/serine-rich 11                                                              |
| 1989 | Q8IWE6           | 3                    | 8              | 8.1                   | 483    | 53414 | 10.5 | Splicing factor, arginine/serine-rich 11                                                             |
| 1990 | Q68E00           | 3                    | 11             | 10.5                  | 315    | 32580 | 6.8  | Hypothetical protein DKFZp686G2045                                                                   |
| 1990 | UPI0000D610D0    | 3                    | 11             | 8.5                   | 387    | 40237 | 5.1  | Adhesion-regulating molecule 1 precursor (110 kDa cell membrane glycoprotein) (Gp110).               |
| 1990 | Q16186           | 3                    | 11             | 8.1                   | 407    | 42153 | 5.1  | Adhesion-regulating molecule 1 precursor                                                             |
| 1991 | Q9BQ04           | 3                    | 7              | 8.1                   | 359    | 40150 | 6.7  | RNA-binding protein 4B                                                                               |
| 1991 | Q9BWF3           | 3                    | 7              | 8                     | 364    | 40314 | 7.1  | RNA-binding protein 4                                                                                |
| 1991 | UPI00001413BF    | 3                    | 7              | 7.9                   | 365    | 40841 | 8.2  | RNA binding motif protein 4 (RBM4), mRNA                                                             |
| 1992 | P48651           | 3                    | 19             | 8                     | 473    | 55528 | 8.4  | Phosphatidylserine synthase 1                                                                        |
| 1993 | Q13454-2         | 3                    | 7              | 8.1                   | 347    | 39558 | 10.1 | Isoform 2 of Q13454                                                                                  |
| 1993 | Q13454           | 3                    | 7              | 8                     | 348    | 39676 | 9.9  | Tumor suppressor candidate 3                                                                         |
| 1994 | Q6UWP7           | 3                    | 10             | 8                     | 414    | 48920 | 8.6  | Lysocardiolipin acyltransferase                                                                      |
| 1995 | Q9UHD9           | 3                    | 7              | 7.9                   | 624    | 65696 | 5.2  | Ubiquilin-2                                                                                          |
| 1996 | Q9Y302-2         | 3                    | 6              | 10.7                  | 335    | 38484 | 9.4  | Isoform 2 of Q9Y302                                                                                  |
| 1996 | UPI0000D4C36B    | 3                    | 6              | 9.5                   | 379    | 43772 | 9.4  | PREDICTED: similar to G protein-coupled receptor 89                                                  |
| 1996 | Q9Y302           | 3                    | 6              | 7.9                   | 455    | 52917 | 9.3  | Protein GPR89A                                                                                       |
| 1996 | UPI0000D61FC4    | 3                    | 6              | 7.9                   | 458    | 53279 | 9.3  | Protein GPR89A (Putative MAPK-activating protein PM01) (Putative NF- kappa-B-activating protein 90). |

| No.  | Accession Number | Unique Peptide Count | Spectrum Count | Sequence Coverage (%) | Length | MolWt | pI  | Descriptive Name                                    |
|------|------------------|----------------------|----------------|-----------------------|--------|-------|-----|-----------------------------------------------------|
| 1997 | UPI000012759A    | 3                    | 6              | 7.9                   | 469    | 51962 | 6.9 | sorting and assembly machinery component 50 homolog |
| 1998 | A0S2X6           | 3                    | 8              | 7.8                   | 603    | 67055 | 9   | NADH dehydrogenase subunit 5                        |
| 1998 | Q4F2Y8           | 3                    | 8              | 7.8                   | 603    | 66963 | 9   | NADH dehydrogenase subunit 5                        |
| 1998 | Q4F2K8           | 3                    | 8              | 7.8                   | 603    | 67012 | 9   | NADH dehydrogenase subunit 5                        |
| 1998 | Q4F2F6           | 3                    | 8              | 7.8                   | 603    | 67027 | 9   | NADH dehydrogenase subunit 5                        |
| 1998 | Q4F200           | 3                    | 8              | 7.8                   | 603    | 67043 | 9   | NADH dehydrogenase subunit 5                        |
| 1998 | Q4F1S2           | 3                    | 8              | 7.8                   | 603    | 67069 | 9   | NADH dehydrogenase subunit 5                        |
| 1998 | Q4F0F4           | 3                    | 8              | 7.8                   | 603    | 67011 | 9   | NADH dehydrogenase subunit 5                        |
| 1998 | Q4F050           | 3                    | 8              | 7.8                   | 603    | 67039 | 9   | NADH dehydrogenase subunit 5                        |
| 1998 | Q4EZT3           | 3                    | 8              | 7.8                   | 603    | 67013 | 9   | NADH dehydrogenase subunit 5                        |
| 1998 | Q4EZO0           | 3                    | 8              | 7.8                   | 603    | 67027 | 9   | NADH dehydrogenase subunit 5                        |
| 1998 | Q4EZP4           | 3                    | 8              | 7.8                   | 603    | 67041 | 9   | NADH dehydrogenase subunit 5                        |
| 1998 | Q4EZ36           | 3                    | 8              | 7.8                   | 603    | 67023 | 9   | NADH dehydrogenase subunit 5                        |
| 1998 | Q4EYP3           | 3                    | 8              | 7.8                   | 603    | 67000 | 9   | NADH dehydrogenase subunit 5                        |
| 1998 | Q4EY48           | 3                    | 8              | 7.8                   | 603    | 66981 | 9   | NADH dehydrogenase subunit 5                        |
| 1998 | Q4EXY9           | 3                    | 8              | 7.8                   | 603    | 66971 | 9   | NADH dehydrogenase subunit 5                        |
| 1998 | Q4EXW4           | 3                    | 8              | 7.8                   | 603    | 67018 | 9   | NADH dehydrogenase subunit 5                        |
| 1998 | Q4EXU5           | 3                    | 8              | 7.8                   | 603    | 67004 | 9   | NADH dehydrogenase subunit 5                        |
| 1998 | Q4EXP2           | 3                    | 8              | 7.8                   | 603    | 67040 | 9   | NADH dehydrogenase subunit 5                        |
| 1998 | Q4EXM9           | 3                    | 8              | 7.8                   | 603    | 67043 | 9.1 | NADH dehydrogenase subunit 5                        |
| 1998 | Q4EWD7           | 3                    | 8              | 7.8                   | 603    | 67023 | 9   | NADH dehydrogenase subunit 5                        |
| 1998 | Q3S9H4           | 3                    | 8              | 7.8                   | 603    | 67057 | 9   | NADH dehydrogenase subunit 5                        |
| 1998 | Q306C1           | 3                    | 8              | 7.8                   | 603    | 67013 | 9   | NADH dehydrogenase subunit 5                        |
| 1998 | Q305W9           | 3                    | 8              | 7.8                   | 603    | 67000 | 9   | NADH dehydrogenase subunit 5                        |
| 1998 | Q2LHU9           | 3                    | 8              | 7.8                   | 603    | 66997 | 9   | NADH dehydrogenase subunit 5                        |
| 1998 | Q2LHB7           | 3                    | 8              | 7.8                   | 603    | 67017 | 9   | NADH dehydrogenase subunit 5                        |
| 1998 | Q2LH26           | 3                    | 8              | 7.8                   | 603    | 67057 | 9   | NADH dehydrogenase subunit 5                        |
| 1998 | Q2L743           | 3                    | 8              | 7.8                   | 603    | 67057 | 9   | NADH dehydrogenase subunit 5                        |
| 1998 | Q2HKQ7           | 3                    | 8              | 7.8                   | 603    | 67025 | 9   | NADH dehydrogenase subunit 5                        |
| 1998 | Q2HKK5           | 3                    | 8              | 7.8                   | 603    | 67012 | 9   | NADH dehydrogenase subunit 5                        |
| 1998 | Q2HJQ6           | 3                    | 8              | 7.8                   | 603    | 66967 | 9   | NADH dehydrogenase subunit 5                        |

| No.  | Accession Number | Unique Peptide Count | Spectrum Count | Sequence Coverage (%) | Length | MolWt | pI  | Descriptive Name                       |
|------|------------------|----------------------|----------------|-----------------------|--------|-------|-----|----------------------------------------|
| 1998 | Q27H51           | 3                    | 8              | 7.8                   | 603    | 67057 | 9   | NADH dehydrogenase subunit 5           |
| 1998 | Q27H25           | 3                    | 8              | 7.8                   | 603    | 67043 | 9   | NADH dehydrogenase subunit 5           |
| 1998 | Q1ZY31           | 3                    | 8              | 7.8                   | 603    | 67072 | 9   | NADH dehydrogenase subunit 5           |
| 1998 | Q1W0U7           | 3                    | 8              | 7.8                   | 603    | 67042 | 9   | NADH dehydrogenase subunit 5           |
| 1998 | Q1ADM1           | 3                    | 8              | 7.8                   | 603    | 66998 | 9   | NADH dehydrogenase subunit 5           |
| 1998 | Q1ADK8           | 3                    | 8              | 7.8                   | 603    | 67040 | 9   | NADH dehydrogenase subunit 5           |
| 1998 | Q15I14           | 3                    | 8              | 7.8                   | 603    | 67013 | 9   | NADH dehydrogenase subunit 5           |
| 1998 | Q15ID2           | 3                    | 8              | 7.8                   | 603    | 67051 | 9   | NADH dehydrogenase subunit 5           |
| 1998 | Q15HM4           | 3                    | 8              | 7.8                   | 603    | 66986 | 9   | NADH dehydrogenase subunit 5           |
| 1998 | Q15HL1           | 3                    | 8              | 7.8                   | 603    | 67000 | 9   | NADH dehydrogenase subunit 5           |
| 1998 | Q15HH2           | 3                    | 8              | 7.8                   | 603    | 67042 | 9   | NADH dehydrogenase subunit 5           |
| 1998 | Q15HE6           | 3                    | 8              | 7.8                   | 603    | 67027 | 9   | NADH dehydrogenase subunit 5           |
| 1998 | Q15H42           | 3                    | 8              | 7.8                   | 603    | 66983 | 9   | NADH dehydrogenase subunit 5           |
| 1998 | Q15GZ0           | 3                    | 8              | 7.8                   | 603    | 67013 | 9   | NADH dehydrogenase subunit 5           |
| 1998 | Q15GW4           | 3                    | 8              | 7.8                   | 603    | 67013 | 9   | NADH dehydrogenase subunit 5           |
| 1998 | Q0ZK24           | 3                    | 8              | 7.8                   | 603    | 66997 | 9   | NADH dehydrogenase subunit 5           |
| 1998 | Q0ZFK3           | 3                    | 8              | 7.8                   | 603    | 67039 | 9   | NADH dehydrogenase subunit 5           |
| 1998 | Q0ZFC5           | 3                    | 8              | 7.8                   | 603    | 66999 | 9   | NADH dehydrogenase subunit 5           |
| 1998 | Q0Z7P8           | 3                    | 8              | 7.8                   | 603    | 66967 | 9   | NADH dehydrogenase subunit 5           |
| 1998 | Q0Z7K9           | 3                    | 8              | 7.8                   | 603    | 66971 | 9   | NADH dehydrogenase subunit 5           |
| 1998 | Q06V50           | 3                    | 8              | 7.8                   | 603    | 67000 | 9   | NADH dehydrogenase subunit 5           |
| 1998 | Q06UH9           | 3                    | 8              | 7.8                   | 603    | 67031 | 9   | NADH dehydrogenase subunit 5           |
| 1998 | Q06UC7           | 3                    | 8              | 7.8                   | 603    | 67000 | 9   | NADH dehydrogenase subunit 5           |
| 1998 | P03915           | 3                    | 8              | 7.8                   | 603    | 67027 | 9   | NADH-ubiquinone oxidoreductase chain 5 |
| 1998 | A3R0P4           | 3                    | 8              | 7.8                   | 603    | 67027 | 9   | NADH dehydrogenase subunit 5           |
| 1998 | A3R0N1           | 3                    | 8              | 7.8                   | 603    | 67069 | 9   | NADH dehydrogenase subunit 5           |
| 1998 | A3R0L8           | 3                    | 8              | 7.8                   | 603    | 67026 | 9.1 | NADH dehydrogenase subunit 5           |
| 1998 | A1Z550           | 3                    | 8              | 7.8                   | 603    | 67007 | 9   | NADH dehydrogenase subunit 5           |
| 1998 | A1Z4K5           | 3                    | 8              | 7.8                   | 603    | 67027 | 9   | NADH dehydrogenase subunit 5           |
| 1998 | A1Z4H9           | 3                    | 8              | 7.8                   | 603    | 67083 | 9   | NADH dehydrogenase subunit 5           |
| 1998 | A1Z4G6           | 3                    | 8              | 7.8                   | 603    | 66997 | 9   | NADH dehydrogenase subunit 5           |
| 1998 | A1E1L3           | 3                    | 8              | 7.8                   | 603    | 67005 | 9   | NADH dehydrogenase subunit 5           |



| No.  | Accession Number | Unique Peptide Count | Spectrum Count | Sequence Coverage (%) | Length | MolWt | pI  | Descriptive Name                                                                                  |
|------|------------------|----------------------|----------------|-----------------------|--------|-------|-----|---------------------------------------------------------------------------------------------------|
| 1998 | A1DVU9           | 3                    | 8              | 7.8                   | 603    | 67051 | 9   | NADH dehydrogenase subunit 5                                                                      |
| 1998 | A1DVT6           | 3                    | 8              | 7.8                   | 603    | 67054 | 9   | NADH dehydrogenase subunit 5                                                                      |
| 1998 | A1DVN4           | 3                    | 8              | 7.8                   | 603    | 67054 | 9   | NADH dehydrogenase subunit 5                                                                      |
| 1998 | A1DV00           | 3                    | 8              | 7.8                   | 603    | 67011 | 9   | NADH dehydrogenase subunit 5                                                                      |
| 1998 | A1DTY1           | 3                    | 8              | 7.8                   | 603    | 67044 | 9   | NADH dehydrogenase subunit 5                                                                      |
| 1998 | A1DTP0           | 3                    | 8              | 7.8                   | 603    | 67028 | 9   | NADH dehydrogenase subunit 5                                                                      |
| 1998 | A1DTE9           | 3                    | 8              | 7.8                   | 603    | 67000 | 9   | NADH dehydrogenase subunit 5                                                                      |
| 1998 | A1DTD6           | 3                    | 8              | 7.8                   | 603    | 67000 | 9   | NADH dehydrogenase subunit 5                                                                      |
| 1998 | A1DT71           | 3                    | 8              | 7.8                   | 603    | 67014 | 9   | NADH dehydrogenase subunit 5                                                                      |
| 1998 | A1DSY0           | 3                    | 8              | 7.8                   | 603    | 67070 | 9   | NADH dehydrogenase subunit 5                                                                      |
| 1998 | A1DSV4           | 3                    | 8              | 7.8                   | 603    | 67070 | 9   | NADH dehydrogenase subunit 5                                                                      |
| 1998 | A1DSU1           | 3                    | 8              | 7.8                   | 603    | 67026 | 9   | NADH dehydrogenase subunit 5                                                                      |
| 1998 | A1DSK0           | 3                    | 8              | 7.8                   | 603    | 67010 | 9   | NADH dehydrogenase subunit 5                                                                      |
| 1998 | A1DSD5           | 3                    | 8              | 7.8                   | 603    | 67010 | 9   | NADH dehydrogenase subunit 5                                                                      |
| 1998 | A0SBQ0           | 3                    | 8              | 7.8                   | 603    | 66953 | 8.9 | NADH dehydrogenase subunit 5                                                                      |
| 1998 | A0SBN6           | 3                    | 8              | 7.8                   | 603    | 66983 | 9   | NADH dehydrogenase subunit 5                                                                      |
| 1998 | A0SBJ7           | 3                    | 8              | 7.8                   | 603    | 67043 | 9   | NADH dehydrogenase subunit 5                                                                      |
| 1998 | A0SBH1           | 3                    | 8              | 7.8                   | 603    | 67017 | 9   | NADH dehydrogenase subunit 5                                                                      |
| 1998 | A0SB29           | 3                    | 8              | 7.8                   | 603    | 67087 | 9   | NADH dehydrogenase subunit 5                                                                      |
| 1998 | A0S952           | 3                    | 8              | 7.8                   | 603    | 67033 | 9   | NADH dehydrogenase subunit 5                                                                      |
| 1998 | A0S939           | 3                    | 8              | 7.8                   | 603    | 67033 | 9   | NADH dehydrogenase subunit 5                                                                      |
| 1998 | A0S8Q9           | 3                    | 8              | 7.8                   | 603    | 67081 | 9   | NADH dehydrogenase subunit 5                                                                      |
| 1998 | A0S811           | 3                    | 8              | 7.8                   | 603    | 67033 | 9   | NADH dehydrogenase subunit 5                                                                      |
| 1998 | A0S4F9           | 3                    | 8              | 7.8                   | 603    | 67015 | 9   | NADH dehydrogenase subunit 5                                                                      |
| 1998 | A0S481           | 3                    | 8              | 7.8                   | 603    | 66979 | 9   | NADH dehydrogenase subunit 5                                                                      |
| 1998 | A0S302           | 3                    | 8              | 7.8                   | 603    | 67041 | 9   | NADH dehydrogenase subunit 5                                                                      |
| 1999 | O43818           | 3                    | 10             | 7.8                   | 475    | 51841 | 7.9 | U3 small nucleolar RNA-interacting protein 2                                                      |
| 2000 | P33240-2         | 3                    | 7              | 8                     | 560    | 59251 | 6.8 | Isoform 2 of P33240                                                                               |
| 2000 | P33240           | 3                    | 7              | 7.8                   | 577    | 60959 | 6.8 | Cleavage stimulation factor 64 kDa subunit                                                        |
| 2000 | UPI0000D61DA0    | 3                    | 7              | 7.4                   | 611    | 64388 | 7.5 | Cleavage stimulation factor 64 kDa subunit (CSTF 64 kDa subunit) (CF-1 64 kDa subunit) (CstF-64). |
| 2001 | Q53GS9           | 3                    | 5              | 7.8                   | 565    | 65381 | 8.9 | U4/U6.U5 tri-snRNP-associated protein 2                                                           |
| 2002 | P35659           | 3                    | 5              | 7.7                   | 375    | 42674 | 8.6 | Protein DEK                                                                                       |

| No.  | Accession Number | Unique Peptide Count | Spectrum Count | Sequence Coverage (%) | Length | MolWt | pI  | Descriptive Name                                                                                                                                                                           |
|------|------------------|----------------------|----------------|-----------------------|--------|-------|-----|--------------------------------------------------------------------------------------------------------------------------------------------------------------------------------------------|
| 2003 | Q6P1S1           | 3                    | 3              | 7.7                   | 414    | 47611 | 6.2 | Mitochondrial ribosomal protein S27                                                                                                                                                        |
| 2004 | Q13895           | 3                    | 4              | 7.6                   | 437    | 49601 | 8.1 | Bystin                                                                                                                                                                                     |
| 2005 | UPI0000D612BA    | 3                    | 7              | 8.4                   | 367    | 41317 | 6.9 | WD repeat and FYVE domain-containing protein 1 (WD40- and FYVE domain-containing protein 1) (Phosphoinositide-binding protein 1) (FENS-1) (Zinc finger FYVE domain-containing protein 17). |
| 2005 | Q8IWB7           | 3                    | 7              | 7.6                   | 410    | 46324 | 7.3 | WD repeat and FYVE domain-containing protein 1                                                                                                                                             |
| 2006 | Q9Y5J1           | 3                    | 5              | 7.6                   | 556    | 62004 | 8.8 | U3 small nucleolar RNA-associated protein 18 homolog                                                                                                                                       |
| 2007 | Q59F45           | 3                    | 10             | 8.3                   | 386    | 43659 | 6.8 | MAD, mothers against decapentaplegic homolog 3 variant                                                                                                                                     |
| 2007 | P84022           | 3                    | 10             | 7.5                   | 425    | 48081 | 7.2 | Mothers against decapentaplegic homolog 3                                                                                                                                                  |
| 2008 | Q9Y5X2           | 3                    | 4              | 7.5                   | 465    | 52569 | 7.4 | Sorting nexin-8                                                                                                                                                                            |
| 2009 | Q2TU87           | 3                    | 4              | 10.8                  | 287    | 32821 | 6   | Growth-inhibiting protein 25                                                                                                                                                               |
| 2009 | P01011           | 3                    | 4              | 7.3                   | 423    | 47651 | 5.5 | Alpha-1-antichymotrypsin precursor (ACT) [Contains: Alpha-1- antichymotrypsin His-Pro-less]                                                                                                |
| 2010 | Q32MB2           | 3                    | 12             | 7.3                   | 381    | 42010 | 8.2 | KRT73 protein                                                                                                                                                                              |
| 2011 | Q6IP98           | 3                    | 14             | 7.2                   | 349    | 40317 | 4.9 | KRT17 protein                                                                                                                                                                              |
| 2012 | Q14738-3         | 3                    | 7              | 8.7                   | 496    | 58453 | 6.8 | Isoform Delta                                                                                                                                                                              |
| 2012 | Q59EF0           | 3                    | 7              | 8.5                   | 503    | 59336 | 7.4 | Delta isoform of regulatory subunit B56, protein phosphatase 2A isoform 1 variant                                                                                                          |
| 2012 | Q14738-2         | 3                    | 7              | 7.5                   | 570    | 66181 | 7.6 | Isoform Delta                                                                                                                                                                              |
| 2012 | Q14738           | 3                    | 7              | 7.1                   | 602    | 69992 | 8.1 | Serine/threonine-protein phosphatase 2A 56 kDa regulatory subunit delta isoform                                                                                                            |
| 2013 | O43172           | 3                    | 5              | 6.9                   | 522    | 58449 | 7.4 | U4/U6 small nuclear ribonucleoprotein Prp4                                                                                                                                                 |
| 2013 | Q6IAP9           | 3                    | 5              | 6.9                   | 521    | 58307 | 7.4 | PRPF4 protein                                                                                                                                                                              |
| 2013 | Q5T1M7           | 3                    | 5              | 6.9                   | 521    | 58321 | 7.4 | PRP4 pre-mRNA processing factor 4 homolog                                                                                                                                                  |
| 2013 | Q59EL4           | 3                    | 5              | 6.7                   | 537    | 60022 | 7.6 | PRPF4 protein variant                                                                                                                                                                      |
| 2014 | Q9UPE4           | 3                    | 3              | 7.5                   | 415    | 47366 | 7.4 | Putative mitochondrial inner membrane protein import receptor                                                                                                                              |
| 2014 | O43615           | 3                    | 3              | 6.9                   | 452    | 51356 | 8.3 | Import inner membrane translocase subunit TIM44, mitochondrial precursor                                                                                                                   |
| 2014 | Q53G69           | 3                    | 3              | 6.9                   | 452    | 51324 | 8.3 | Translocase of inner mitochondrial membrane 44 homolog                                                                                                                                     |
| 2015 | Q86VP5           | 3                    | 6              | 6.9                   | 507    | 58579 | 7.5 | SEPT10 protein                                                                                                                                                                             |
| 2015 | Q9P0V9           | 3                    | 6              | 6.8                   | 517    | 59982 | 7.1 | Septin-10                                                                                                                                                                                  |
| 2015 | UPI0000456E33    | 3                    | 6              | 6.7                   | 519    | 60191 | 6.9 | Septin-10.                                                                                                                                                                                 |
| 2015 | UPI0000D61215    | 3                    | 6              | 6.4                   | 547    | 63282 | 6.8 | Septin-10.                                                                                                                                                                                 |
| 2016 | Q9BV38           | 3                    | 6              | 6.9                   | 432    | 47405 | 6.7 | WD repeat protein 18                                                                                                                                                                       |
| 2017 | Q59EH7           | 3                    | 9              | 6.8                   | 483    | 55418 | 7.5 | DnaJ (Hsp40) homolog, subfamily C, member 7 variant                                                                                                                                        |
| 2017 | Q99615           | 3                    | 9              | 6.7                   | 494    | 56441 | 7   | DnaJ homolog subfamily C member 7                                                                                                                                                          |
| 2018 | UPI000045753E    | 3                    | 11             | 8.5                   | 520    | 57444 | 5.7 | KIAA0241 (KIAA0241), mRNA                                                                                                                                                                  |
| 2018 | Q8NBF6-2         | 3                    | 11             | 7.4                   | 591    | 65313 | 6   | Isoform 2 of Q8NBF6                                                                                                                                                                        |
| 2018 | Q8NBF6           | 3                    | 11             | 6.8                   | 648    | 71947 | 6.2 | Protein KIAA0241                                                                                                                                                                           |

| No.  | Accession Number | Unique Peptide Count | Spectrum Count | Sequence Coverage (%) | Length | MolWt  | pI  | Descriptive Name                                                                                                   |
|------|------------------|----------------------|----------------|-----------------------|--------|--------|-----|--------------------------------------------------------------------------------------------------------------------|
| 2019 | Q13131           | 3                    | 3              | 6.7                   | 550    | 62808  | 7.6 | 5'-AMP-activated protein kinase catalytic subunit alpha-1                                                          |
| 2019 | UPI000020C9F6    | 3                    | 3              | 6.6                   | 559    | 64009  | 8.1 | protein kinase, AMP-activated, alpha 1 catalytic subunit isoform 1                                                 |
| 2019 | UPI00002263A3    | 3                    | 3              | 6.5                   | 565    | 64322  | 7.7 | 5'-AMP-activated protein kinase catalytic subunit alpha-1 (EC 2.7.11.1) (AMPK alpha-1 chain).                      |
| 2019 | UPI00003529FB    | 3                    | 3              | 6.4                   | 574    | 65523  | 8.2 | protein kinase, AMP-activated, alpha 1 catalytic subunit isoform 2                                                 |
| 2019 | Q86VS1           | 3                    | 3              | 6.4                   | 574    | 65505  | 8.2 | Protein kinase, AMP-activated, alpha 1 catalytic subunit                                                           |
| 2020 | Q59GU6           | 3                    | 7              | 8.1                   | 432    | 50099  | 7   | Sorting nexin 1 isoform a variant                                                                                  |
| 2020 | Q13596-2         | 3                    | 7              | 7.7                   | 457    | 51813  | 5.6 | Isoform 1A of Q13596                                                                                               |
| 2020 | UPI0000D61352    | 3                    | 7              | 7.6                   | 460    | 52225  | 5.9 | Sorting nexin-1.                                                                                                   |
| 2020 | UPI000045686A    | 3                    | 7              | 7.4                   | 473    | 53189  | 5.1 | Sorting nexin-1.                                                                                                   |
| 2020 | UPI000013FEB0    | 3                    | 7              | 7.4                   | 474    | 53304  | 5   | sorting nexin 1 isoform c                                                                                          |
| 2020 | Q13596           | 3                    | 7              | 6.7                   | 522    | 59070  | 5.1 | Sorting nexin-1                                                                                                    |
| 2020 | UPI0000456869    | 3                    | 7              | 6.7                   | 521    | 58955  | 5.2 | Sorting nexin-1.                                                                                                   |
| 2020 | Q53HL9           | 3                    | 7              | 6.7                   | 522    | 59022  | 5.2 | Sorting nexin 1 isoform a variant                                                                                  |
| 2020 | Q53GY8           | 3                    | 7              | 6.7                   | 522    | 59012  | 5.2 | Sorting nexin 1 isoform a variant                                                                                  |
| 2021 | Q14258           | 3                    | 15             | 6.7                   | 630    | 70990  | 8.1 | Tripartite motif-containing protein 25                                                                             |
| 2021 | UPI00001AE6B8    | 3                    | 15             | 6.7                   | 630    | 70974  | 8.1 | tripartite motif-containing 25                                                                                     |
| 2021 | Q59GW5           | 3                    | 15             | 6.5                   | 644    | 72250  | 8.1 | Tripartite motif-containing 25 variant                                                                             |
| 2022 | Q7Z434           | 3                    | 9              | 6.7                   | 540    | 56528  | 5.5 | Mitochondrial antiviral-signaling protein                                                                          |
| 2023 | P07196           | 3                    | 3              | 6.6                   | 543    | 61517  | 4.6 | Neurofilament light polypeptide                                                                                    |
| 2023 | UPI0000246DBD    | 3                    | 3              | 6.6                   | 542    | 61430  | 4.6 | Neurofilament triplet L protein (68 kDa neurofilament protein) (Neurofilament light polypeptide) (NF-L).           |
| 2024 | Q16566           | 3                    | 3              | 6.6                   | 473    | 51926  | 5.8 | Calcium/calmodulin-dependent protein kinase type IV                                                                |
| 2025 | Q6P1A2           | 3                    | 5              | 6.6                   | 487    | 56035  | 8.7 | Membrane-bound O-acyltransferase domain-containing protein 5                                                       |
| 2026 | Q8NHP8           | 3                    | 9              | 6.6                   | 589    | 65472  | 7   | Hypothetical protein LOC196463                                                                                     |
| 2026 | UPI000013DC40    | 3                    | 9              | 6.6                   | 589    | 65472  | 6.8 | UPI000013DC40 UniRef100 entry                                                                                      |
| 2027 | Q8NG18           | 3                    | 3              | 6.5                   | 554    | 63522  | 5.1 | Chronic myelogenous leukemia tumor antigen 66 short form                                                           |
| 2027 | UPI000021048A    | 3                    | 3              | 6.2                   | 583    | 66756  | 5.1 | NudC domain containing 1                                                                                           |
| 2027 | Q9BVR5           | 3                    | 3              | 6.2                   | 583    | 66790  | 5.1 | NudC domain containing 1                                                                                           |
| 2027 | Q96S14           | 3                    | 3              | 6.2                   | 583    | 66729  | 5.1 | CDNA FLJ14991 fis, clone Y79AA1001781                                                                              |
| 2027 | Q96RS6           | 3                    | 3              | 6.2                   | 583    | 66776  | 5.1 | NudC domain-containing protein 1                                                                                   |
| 2028 | Q08AM6           | 3                    | 6              | 6.3                   | 782    | 87973  | 6.1 | Vac14 homolog                                                                                                      |
| 2028 | UPI0000DD83A9    | 3                    | 6              | 4                     | 1240   | 135879 | 8.6 | PREDICTED: similar to Vac14 homolog                                                                                |
| 2029 | P10515           | 3                    | 6              | 6.2                   | 614    | 65781  | 6.1 | Dihydrolipoyllysine-residue acetyltransferase component of pyruvate dehydrogenase complex, mitochondrial precursor |

| No.  | Accession Number | Unique Peptide Count | Spectrum Count | Sequence Coverage (%) | Length | MolWt  | pI   | Descriptive Name                                                                                                                                                                                                                                                                                                  |
|------|------------------|----------------------|----------------|-----------------------|--------|--------|------|-------------------------------------------------------------------------------------------------------------------------------------------------------------------------------------------------------------------------------------------------------------------------------------------------------------------|
| 2029 | Q86YI5           | 3                    | 6              | 5.9                   | 647    | 68997  | 7.8  | Dihydrolipoamide S-acetyltransferase                                                                                                                                                                                                                                                                              |
| 2029 | Q53EP3           | 3                    | 6              | 5.9                   | 647    | 68996  | 8    | Dihydrolipoamide S-acetyltransferase (E2 component of pyruvate dehydrogenase complex) variant                                                                                                                                                                                                                     |
| 2030 | P43007           | 3                    | 11             | 6.2                   | 532    | 55723  | 6.3  | Neutral amino acid transporter A                                                                                                                                                                                                                                                                                  |
| 2030 | Q53F03           | 3                    | 11             | 6.2                   | 532    | 55723  | 6.3  | Solute carrier family 1, member 4 variant                                                                                                                                                                                                                                                                         |
| 2031 | Q05BM8           | 3                    | 9              | 6.2                   | 499    | 57337  | 7.8  | GALNT1 protein                                                                                                                                                                                                                                                                                                    |
| 2031 | Q10472           | 3                    | 9              | 5.5                   | 559    | 64219  | 7.7  | Polypeptide N-acetylgalactosaminyltransferase 1 (EC 2.4.1.41) (Protein-UDP acetylgalactosaminyltransferase 1) (UDP-GalNAc:polypeptide N-acetylgalactosaminyltransferase 1) (Polypeptide GalNAc transferase 1) (GalNAc-T1) (pp-GaNTase 1) [Contains: Polypeptide N-acetylgalactosaminyltransferase 1 soluble form] |
| 2032 | Q5T2B5           | 3                    | 5              | 6.5                   | 706    | 82359  | 6.7  | Cullin 2                                                                                                                                                                                                                                                                                                          |
| 2032 | Q13617           | 3                    | 5              | 6.2                   | 745    | 86983  | 6.9  | Cullin-2                                                                                                                                                                                                                                                                                                          |
| 2033 | Q53HB9           | 3                    | 6              | 6.2                   | 547    | 61566  | 9.3  | DEAD (Asp-Glu-Ala-Asp) box polypeptide 56 variant                                                                                                                                                                                                                                                                 |
| 2033 | Q9NY93           | 3                    | 6              | 6.2                   | 547    | 61590  | 9.3  | Probable ATP-dependent RNA helicase DDX56                                                                                                                                                                                                                                                                         |
| 2033 | Q6IAE2           | 3                    | 6              | 6.2                   | 547    | 61640  | 9.3  | DDX56 protein                                                                                                                                                                                                                                                                                                     |
| 2034 | Q5R363           | 3                    | 6              | 6.2                   | 547    | 62033  | 5.7  | SFRS protein kinase 1                                                                                                                                                                                                                                                                                             |
| 2034 | UPI000020DBDD    | 3                    | 6              | 5.2                   | 655    | 74325  | 6.2  | SFRS protein kinase 1                                                                                                                                                                                                                                                                                             |
| 2034 | UPI000015FF90    | 3                    | 6              | 5.2                   | 654    | 74226  | 6.2  | Serine/threonine-protein kinase SRPK1 (EC 2.7.11.1) (Serine/arginine-rich protein-specific kinase 1) (SR-protein-specific kinase 1) (SFRS protein kinase 1).                                                                                                                                                      |
| 2034 | Q96SB4-2         | 3                    | 6              | 5.2                   | 655    | 74320  | 6.2  | Isoform 2 of Q96SB4                                                                                                                                                                                                                                                                                               |
| 2034 | UPI0000D61435    | 3                    | 6              | 4.1                   | 825    | 92447  | 7.9  | Serine/threonine-protein kinase SRPK1 (EC 2.7.11.1) (Serine/arginine-rich protein-specific kinase 1) (SR-protein-specific kinase 1) (SFRS protein kinase 1).                                                                                                                                                      |
| 2034 | Q96SB4           | 3                    | 6              | 4.1                   | 826    | 92407  | 7.7  | Serine/threonine-protein kinase SRPK1                                                                                                                                                                                                                                                                             |
| 2035 | Q96K12           | 3                    | 6              | 6.2                   | 515    | 59439  | 9.4  | Fatty acyl-CoA reductase 2                                                                                                                                                                                                                                                                                        |
| 2036 | Q8WXA9-2         | 3                    | 3              | 6.1                   | 624    | 71650  | 10.2 | Isoform 2 of Q8WXA9                                                                                                                                                                                                                                                                                               |
| 2037 | UPI00004572F1    | 3                    | 10             | 6                     | 974    | 112369 | 5.2  | Importin-11 (Imp11) (Ran-binding protein 11) (RanBP11).                                                                                                                                                                                                                                                           |
| 2037 | Q9UI26           | 3                    | 10             | 5.9                   | 975    | 112535 | 5.3  | Importin-11                                                                                                                                                                                                                                                                                                       |
| 2038 | Q53H59           | 3                    | 3              | 5.8                   | 756    | 84451  | 6.2  | Estrogen receptor binding protein variant                                                                                                                                                                                                                                                                         |
| 2038 | Q76MJ8           | 3                    | 3              | 5.8                   | 756    | 84469  | 6.2  | TdT interacting factor 2                                                                                                                                                                                                                                                                                          |
| 2038 | Q6TLI0           | 3                    | 3              | 5.8                   | 756    | 84444  | 6    | Estrogen receptor binding protein                                                                                                                                                                                                                                                                                 |
| 2038 | Q5QJE6           | 3                    | 3              | 5.8                   | 756    | 84455  | 6.2  | LPTS-RP2                                                                                                                                                                                                                                                                                                          |
| 2038 | Q5TFJ4           | 3                    | 3              | 5.4                   | 810    | 90670  | 6    | Deoxynucleotidyltransferase terminal-interacting protein 2                                                                                                                                                                                                                                                        |
| 2039 | P20839-2         | 3                    | 11             | 7                     | 489    | 52598  | 6.6  | Isoform 2 of P20839                                                                                                                                                                                                                                                                                               |

| No.  | Accession Number | Unique Peptide Count | Spectrum Count | Sequence Coverage (%) | Length | MolWt | pI  | Descriptive Name                                                                                                  |
|------|------------------|----------------------|----------------|-----------------------|--------|-------|-----|-------------------------------------------------------------------------------------------------------------------|
| 2039 | P20839           | 3                    | 11             | 6.6                   | 514    | 55406 | 6.9 | Inosine-5'-monophosphate dehydrogenase 1                                                                          |
| 2039 | UPI0000D61CCC    | 3                    | 11             | 6.4                   | 528    | 56788 | 7.1 | Inosine-5'-monophosphate dehydrogenase 1 (EC 1.1.1.205) (IMP dehydrogenase 1) (IMPDH-I) (IMPD 1).                 |
| 2039 | Q6ZNB1           | 3                    | 11             | 6.4                   | 530    | 57050 | 7.3 | CDNA FLJ16255 fis, clone HLUNG2015548, highly similar to INOSINE-5'- MONOPHOSPHATE DEHYDROGENASE 1                |
| 2039 | UPI0000D61CCB    | 3                    | 11             | 6.1                   | 561    | 60210 | 6.6 | Inosine-5'-monophosphate dehydrogenase 1 (EC 1.1.1.205) (IMP dehydrogenase 1) (IMPDH-I) (IMPD 1).                 |
| 2039 | UPI0000D61CCD    | 3                    | 11             | 5.8                   | 587    | 63025 | 6.7 | Inosine-5'-monophosphate dehydrogenase 1 (EC 1.1.1.205) (IMP dehydrogenase 1) (IMPDH-I) (IMPD 1).                 |
| 2039 | A4D0Z6           | 3                    | 11             | 5.7                   | 599    | 64320 | 7   | IMP (Inosine monophosphate) dehydrogenase 1                                                                       |
| 2039 | UPI0000D61CCA    | 3                    | 11             | 5.7                   | 597    | 64093 | 6.9 | Inosine-5'-monophosphate dehydrogenase 1 (EC 1.1.1.205) (IMP dehydrogenase 1) (IMPDH-I) (IMPD 1).                 |
| 2039 | Q5H9Q6           | 3                    | 11             | 5.7                   | 599    | 64537 | 8   | Hypothetical protein DKFZp781N0678                                                                                |
| 2040 | Q14680           | 3                    | 5              | 5.7                   | 651    | 74642 | 8.7 | Maternal embryonic leucine zipper kinase                                                                          |
| 2040 | Q53GX0           | 3                    | 5              | 5.7                   | 651    | 74642 | 8.7 | Maternal embryonic leucine zipper kinase variant                                                                  |
| 2041 | P27694           | 3                    | 8              | 5.5                   | 616    | 68138 | 7.2 | Replication protein A 70 kDa DNA-binding subunit                                                                  |
| 2042 | O95352           | 3                    | 9              | 5.4                   | 703    | 77960 | 6.2 | Autophagy-related protein 7                                                                                       |
| 2043 | Q8N9Z3           | 3                    | 52             | 6.6                   | 579    | 66047 | 7.3 | CDNA FLJ36025 fis, clone TESTI2016701, highly similar to TUMOR NECROSIS FACTOR TYPE 1 RECEPTOR ASSOCIATED PROTEIN |
| 2043 | Q12931           | 3                    | 52             | 5.4                   | 704    | 80110 | 8.2 | Heat shock protein 75 kDa, mitochondrial precursor                                                                |
| 2043 | UPI0000001C1A    | 3                    | 52             | 5.4                   | 704    | 80011 | 8   | TNF receptor-associated protein 1                                                                                 |
| 2043 | Q9BV61           | 3                    | 52             | 5.4                   | 699    | 79357 | 7.8 | TRAP1 protein                                                                                                     |
| 2043 | Q53G55           | 3                    | 52             | 5.4                   | 704    | 80039 | 8   | TNF receptor-associated protein 1 variant                                                                         |
| 2043 | Q53FS6           | 3                    | 52             | 5.4                   | 704    | 80091 | 8   | TNF receptor-associated protein 1 variant                                                                         |
| 2044 | Q9Y5X1           | 3                    | 3              | 5.4                   | 595    | 66592 | 5.6 | Sorting nexin-9                                                                                                   |
| 2045 | UPI0000160BED    | 3                    | 9              | 6                     | 583    | 61287 | 9.1 | Ewing sarcoma breakpoint region 1 isoform EWS-b                                                                   |
| 2045 | Q01844-2         | 3                    | 9              | 6                     | 583    | 61217 | 9.1 | Isoform EWS                                                                                                       |
| 2045 | UPI0000457066    | 3                    | 9              | 5.8                   | 600    | 62508 | 9.4 | RNA-binding protein EWS (EWS oncogene) (Ewing sarcoma breakpoint region 1 protein).                               |
| 2045 | Q96MN4           | 3                    | 9              | 5.8                   | 600    | 62478 | 9.4 | CDNA FLJ32119 fis, clone PEBLM1000034, highly similar to RNA-BINDING PROTEIN EWS                                  |
| 2045 | Q01844           | 3                    | 9              | 5.3                   | 656    | 68478 | 9.3 | RNA-binding protein EWS                                                                                           |

| No.  | Accession Number | Unique Peptide Count | Spectrum Count | Sequence Coverage (%) | Length | MolWt  | pI  | Descriptive Name                                                                                                                                                                                                                                                                                                                                                                                                                                                                                                                                                                                                                                                                                         |
|------|------------------|----------------------|----------------|-----------------------|--------|--------|-----|----------------------------------------------------------------------------------------------------------------------------------------------------------------------------------------------------------------------------------------------------------------------------------------------------------------------------------------------------------------------------------------------------------------------------------------------------------------------------------------------------------------------------------------------------------------------------------------------------------------------------------------------------------------------------------------------------------|
| 2045 | Q96MX4           | 3                    | 9              | 5.3                   | 661    | 68966  | 9.3 | CDNA FLJ31747 fis, clone NT2RI2007377, highly similar to RNA-BINDING PROTEIN EWS                                                                                                                                                                                                                                                                                                                                                                                                                                                                                                                                                                                                                         |
| 2045 | Q96FE8           | 3                    | 9              | 5.3                   | 655    | 68391  | 9.3 | Ewing sarcoma breakpoint region 1                                                                                                                                                                                                                                                                                                                                                                                                                                                                                                                                                                                                                                                                        |
| 2046 | Q3YEC7           | 3                    | 5              | 5.3                   | 729    | 79549  | 5.2 | Putative GTP-binding protein Parf                                                                                                                                                                                                                                                                                                                                                                                                                                                                                                                                                                                                                                                                        |
| 2046 | Q3YEC7-2         | 3                    | 5              | 5.3                   | 730    | 79636  | 5.2 | Isoform 2 of Q3YEC7                                                                                                                                                                                                                                                                                                                                                                                                                                                                                                                                                                                                                                                                                      |
| 2047 | Q5R914           | 3                    | 8              | 5.3                   | 511    | 57659  | 6.3 | Serine/threonine protein phosphatase                                                                                                                                                                                                                                                                                                                                                                                                                                                                                                                                                                                                                                                                     |
| 2048 | Q96ST2-2         | 3                    | 5              | 8.7                   | 494    | 56109  | 5.4 | Isoform 2 of Q96ST2                                                                                                                                                                                                                                                                                                                                                                                                                                                                                                                                                                                                                                                                                      |
| 2048 | Q96ST2-3         | 3                    | 5              | 7                     | 612    | 69108  | 4.9 | Isoform 3 of Q96ST2                                                                                                                                                                                                                                                                                                                                                                                                                                                                                                                                                                                                                                                                                      |
| 2048 | Q96ST2           | 3                    | 5              | 5.3                   | 819    | 91955  | 4.7 | IWS1 homolog                                                                                                                                                                                                                                                                                                                                                                                                                                                                                                                                                                                                                                                                                             |
| 2049 | P05067-3         | 3                    | 18             | 5.9                   | 677    | 76760  | 4.8 | Isoform L                                                                                                                                                                                                                                                                                                                                                                                                                                                                                                                                                                                                                                                                                                |
| 2049 | P05067-4         | 3                    | 18             | 5.8                   | 695    | 78663  | 4.8 | Isoform APP695 of P05067                                                                                                                                                                                                                                                                                                                                                                                                                                                                                                                                                                                                                                                                                 |
| 2049 | P05067-5         | 3                    | 18             | 5.7                   | 696    | 78866  | 4.8 | Isoform L                                                                                                                                                                                                                                                                                                                                                                                                                                                                                                                                                                                                                                                                                                |
| 2049 | P05067-6         | 3                    | 18             | 5.6                   | 714    | 80769  | 4.8 | Isoform APP714 of P05067                                                                                                                                                                                                                                                                                                                                                                                                                                                                                                                                                                                                                                                                                 |
| 2049 | P05067-7         | 3                    | 18             | 5.5                   | 733    | 82916  | 4.8 | Isoform L                                                                                                                                                                                                                                                                                                                                                                                                                                                                                                                                                                                                                                                                                                |
| 2049 | Q6GSC0           | 3                    | 18             | 5.3                   | 751    | 84819  | 4.8 | Amyloid beta (A4) protein                                                                                                                                                                                                                                                                                                                                                                                                                                                                                                                                                                                                                                                                                |
| 2049 | P05067-9         | 3                    | 18             | 5.3                   | 752    | 85040  | 4.8 | Isoform L                                                                                                                                                                                                                                                                                                                                                                                                                                                                                                                                                                                                                                                                                                |
| 2049 | P05067           | 3                    | 18             | 5.2                   | 770    | 86943  | 4.8 | Amyloid beta A4 protein precursor (APP) (ABPP) (Alzheimer disease amyloid protein) (Cerebral vascular amyloid peptide) (CVAP) (Protease nexin-II) (PN-II) (APPI) (PreA4) [Contains: Soluble APP-alpha (S-APP-alpha); Soluble APP-beta (S-APP-beta); C99; Beta-amyloid protein 42 (Beta-APP42); Beta-amyloid protein 40 (Beta-APP40); C83; P3(42); P3(40); Gamma-CTF(59) (Gamma-secretase C-terminal fragment 59) (Amyloid intracellular domain 59) (AID(59)) (AICD-59); Gamma-CTF(57) (Gamma-secretase C-terminal fragment 57) (Amyloid intracellular domain 57) (AID(57)) (AICD-57); Gamma-CTF(50) (Gamma-secretase C-terminal fragment 50) (Amyloid intracellular domain 50) (AID(50)) (AICD-50); C31] |
| 2050 | Q13416           | 3                    | 3              | 5.2                   | 577    | 65972  | 6.5 | Origin recognition complex subunit 2                                                                                                                                                                                                                                                                                                                                                                                                                                                                                                                                                                                                                                                                     |
| 2051 | Q9UBY2           | 3                    | 3              | 5.2                   | 712    | 77243  | 5.5 | Neurochondrin-2                                                                                                                                                                                                                                                                                                                                                                                                                                                                                                                                                                                                                                                                                          |
| 2051 | Q9UBB6           | 3                    | 3              | 5.1                   | 729    | 78864  | 5.5 | Neurochondrin-1                                                                                                                                                                                                                                                                                                                                                                                                                                                                                                                                                                                                                                                                                          |
| 2051 | Q9Y4D9           | 3                    | 3              | 5.1                   | 731    | 79158  | 5.6 | Neurochondrin                                                                                                                                                                                                                                                                                                                                                                                                                                                                                                                                                                                                                                                                                            |
| 2051 | Q9Y4A6           | 3                    | 3              | 5.1                   | 730    | 78963  | 5.5 | Hypothetical protein WUGSC:H_DJ0728D04.2                                                                                                                                                                                                                                                                                                                                                                                                                                                                                                                                                                                                                                                                 |
| 2052 | Q9Y2W2           | 3                    | 10             | 5.1                   | 641    | 69998  | 8.4 | WW domain-binding protein 11                                                                                                                                                                                                                                                                                                                                                                                                                                                                                                                                                                                                                                                                             |
| 2053 | P43121           | 3                    | 6              | 5                     | 646    | 71608  | 5.8 | Cell surface glycoprotein MUC18 precursor                                                                                                                                                                                                                                                                                                                                                                                                                                                                                                                                                                                                                                                                |
| 2054 | Q9H3U1-2         | 3                    | 14             | 5.1                   | 929    | 101675 | 6.1 | Isoform 2 of Q9H3U1                                                                                                                                                                                                                                                                                                                                                                                                                                                                                                                                                                                                                                                                                      |
| 2054 | Q9H3U1           | 3                    | 14             | 5                     | 944    | 103077 | 6.1 | UNC45 homolog A                                                                                                                                                                                                                                                                                                                                                                                                                                                                                                                                                                                                                                                                                          |
| 2055 | O95202           | 3                    | 12             | 4.9                   | 739    | 83354  | 6.7 | Leucine zipper-EF-hand-containing transmembrane protein 1, mitochondrial precursor                                                                                                                                                                                                                                                                                                                                                                                                                                                                                                                                                                                                                       |

| No.  | Accession Number | Unique Peptide Count | Spectrum Count | Sequence Coverage (%) | Length | MolWt  | pI  | Descriptive Name                                                                                                                                                                  |
|------|------------------|----------------------|----------------|-----------------------|--------|--------|-----|-----------------------------------------------------------------------------------------------------------------------------------------------------------------------------------|
| 2056 | O95834           | 3                    | 4              | 4.9                   | 649    | 70679  | 6.3 | Echinoderm microtubule-associated protein-like 2                                                                                                                                  |
| 2057 | P21399           | 3                    | 4              | 4.9                   | 889    | 98399  | 6.7 | Iron-responsive element-binding protein 1                                                                                                                                         |
| 2058 | O60518           | 3                    | 13             | 4.8                   | 1105   | 124713 | 5   | Ran-binding protein 6                                                                                                                                                             |
| 2059 | A4D1R2           | 3                    | 3              | 4.6                   | 699    | 77903  | 8.4 | Zinc finger CCCH type, antiviral 1                                                                                                                                                |
| 2059 | UPI0000457619    | 3                    | 3              | 3.5                   | 902    | 101444 | 8.3 | Zinc finger CCCH type antiviral protein 1 (Zinc finger CCCH domain-containing protein 2).                                                                                         |
| 2059 | Q7Z2W4           | 3                    | 3              | 3.5                   | 902    | 101444 | 8.3 | Zinc finger CCCH type antiviral protein 1                                                                                                                                         |
| 2059 | A4D1S4           | 3                    | 3              | 3.5                   | 902    | 101431 | 8.4 | Zinc finger CCCH type, antiviral 1                                                                                                                                                |
| 2060 | P33121-2         | 3                    | 4              | 4.7                   | 688    | 76871  | 7   | Isoform 2 of P33121                                                                                                                                                               |
| 2060 | P33121           | 3                    | 4              | 4.6                   | 698    | 77943  | 7.1 | Long-chain-fatty-acid--CoA ligase 1                                                                                                                                               |
| 2061 | Q6NX51           | 3                    | 5              | 4.5                   | 974    | 110498 | 6.5 | Exocyst complex component 4                                                                                                                                                       |
| 2061 | Q96A65           | 3                    | 5              | 4.5                   | 974    | 110498 | 6.5 | Exocyst complex component 4                                                                                                                                                       |
| 2062 | UPI0000141B4C    | 3                    | 25             | 4.9                   | 932    | 102639 | 6.4 | MMS19-like protein (hMMS19) (MET18 homolog).                                                                                                                                      |
| 2062 | Q96T76-5         | 3                    | 25             | 4.9                   | 932    | 102625 | 6.4 | Isoform 5 of Q96T76                                                                                                                                                               |
| 2062 | Q96T76           | 3                    | 25             | 4.5                   | 1030   | 113275 | 6.4 | MMS19-like protein                                                                                                                                                                |
| 2062 | UPI000013DDF7    | 3                    | 25             | 4.5                   | 1030   | 113289 | 6.4 | MMS19-like protein (hMMS19) (MET18 homolog).                                                                                                                                      |
| 2062 | UPI000007172D    | 3                    | 25             | 4.5                   | 1030   | 113318 | 6.3 | MMS19-like (MET18 homolog, <i>S. cerevisiae</i> )                                                                                                                                 |
| 2063 | Q8WUM9           | 3                    | 8              | 4.4                   | 679    | 73700  | 7.1 | Sodium-dependent phosphate transporter 1                                                                                                                                          |
| 2064 | Q9Y2J2-2         | 3                    | 5              | 5.5                   | 865    | 96514  | 5.4 | Isoform B of Q9Y2J2                                                                                                                                                               |
| 2064 | Q9Y2J2           | 3                    | 5              | 4.4                   | 1087   | 120677 | 5.2 | Band 4.1-like protein 3                                                                                                                                                           |
| 2065 | P43246           | 3                    | 6              | 4.3                   | 934    | 104743 | 5.8 | DNA mismatch repair protein Msh2                                                                                                                                                  |
| 2066 | Q14562           | 3                    | 9              | 4.3                   | 1220   | 139314 | 8.3 | ATP-dependent RNA helicase DHX8                                                                                                                                                   |
| 2066 | Q86YB2           | 3                    | 9              | 4.3                   | 1220   | 139314 | 8.4 | DEAH (Asp-Glu-Ala-His) box polypeptide 8                                                                                                                                          |
| 2066 | Q86X36           | 3                    | 9              | 4.3                   | 1220   | 139287 | 8.1 | DEAH (Asp-Glu-Ala-His) box polypeptide 8                                                                                                                                          |
| 2067 | Q9UPT8           | 3                    | 9              | 4.3                   | 1303   | 140256 | 6.3 | Zinc finger CCCH domain-containing protein C19orf7                                                                                                                                |
| 2067 | UPI0000D617DC    | 3                    | 9              | 4.3                   | 1317   | 141672 | 6.2 | Zinc finger CCCH domain-containing protein C19orf7.                                                                                                                               |
| 2068 | O15042-3         | 3                    | 25             | 6.9                   | 620    | 72524  | 7.6 | Isoform 3 of O15042                                                                                                                                                               |
| 2068 | O15042           | 3                    | 25             | 4.2                   | 1029   | 118292 | 8.5 | U2-associated protein SR140                                                                                                                                                       |
| 2068 | UPI0000457184    | 3                    | 25             | 4.2                   | 1029   | 118305 | 8.5 | U2-associated SR140 protein                                                                                                                                                       |
| 2068 | O15042-2         | 3                    | 25             | 4.2                   | 1028   | 118235 | 8.5 | Isoform 2 of O15042                                                                                                                                                               |
| 2069 | O43290           | 3                    | 7              | 4.2                   | 800    | 90255  | 6.1 | U4/U6.U5 tri-snRNP-associated protein 1                                                                                                                                           |
| 2069 | UPI0000D62637    | 3                    | 7              | 4.2                   | 800    | 90310  | 6.2 | U4/U6.U5 tri-snRNP-associated protein 1 (U4/U6.U5 tri-snRNP-associated 110 kDa protein) (Squamous cell carcinoma antigen recognized by T cells 1) (SART-1) (hSART-1) (hSnu66).    |
| 2070 | P08648           | 3                    | 3              | 4.2                   | 1049   | 114536 | 5.8 | Integrin alpha-5 precursor (Fibronectin receptor subunit alpha) (Integrin alpha-F) (VLA-5) (CD49e antigen) [Contains: Integrin alpha-5 heavy chain; Integrin alpha-5 light chain] |
| 2071 | UPI00004569D8    | 3                    | 5              | 5.3                   | 756    | 83908  | 5.6 | conserved nuclear protein NHN1                                                                                                                                                    |

| No.  | Accession Number | Unique Peptide Count | Spectrum Count | Sequence Coverage (%) | Length | MolWt  | pI  | Descriptive Name                                                                                                                  |
|------|------------------|----------------------|----------------|-----------------------|--------|--------|-----|-----------------------------------------------------------------------------------------------------------------------------------|
| 2071 | Q96MP7           | 3                    | 5              | 5.3                   | 757    | 84074  | 5.7 | CDNA FLJ32070 fis, clone OCBBF1000119                                                                                             |
| 2071 | Q86VM9           | 3                    | 5              | 4.2                   | 953    | 106359 | 8.2 | Conserved nuclear protein NHN1                                                                                                    |
| 2071 | UPI00001FF676    | 3                    | 5              | 4.2                   | 953    | 106379 | 8.3 | conserved nuclear protein NHN1                                                                                                    |
| 2072 | Q96QU8           | 3                    | 4              | 4.2                   | 1125   | 128883 | 6.4 | Exportin-6                                                                                                                        |
| 2073 | P49756           | 3                    | 6              | 4.3                   | 784    | 94122  | 6.2 | Probable RNA-binding protein 25                                                                                                   |
| 2073 | A0PJL9           | 3                    | 6              | 4.1                   | 839    | 99723  | 6.3 | RBM25 protein                                                                                                                     |
| 2073 | UPI0000373D58    | 3                    | 6              | 4                     | 843    | 100186 | 6.3 | RNA binding motif protein 25                                                                                                      |
| 2074 | P23588           | 3                    | 12             | 4.1                   | 611    | 69224  | 5.7 | Eukaryotic translation initiation factor 4B                                                                                       |
| 2074 | UPI0000D621F8    | 3                    | 12             | 4.1                   | 610    | 69167  | 5.8 | Eukaryotic translation initiation factor 4B (eIF-4B).                                                                             |
| 2074 | Q8WYK5           | 3                    | 12             | 4.1                   | 611    | 69151  | 5.7 | Eukaryotic initiation factor 4B                                                                                                   |
| 2074 | Q6IB46           | 3                    | 12             | 4.1                   | 611    | 69137  | 5.7 | EIF4B protein                                                                                                                     |
| 2074 | Q6GPH5           | 3                    | 12             | 4.1                   | 611    | 69166  | 5.7 | Eukaryotic translation initiation factor 4B                                                                                       |
| 2074 | Q53HQ2           | 3                    | 12             | 4.1                   | 611    | 69151  | 5.7 | Eukaryotic translation initiation factor 4B variant                                                                               |
| 2074 | Q4G0E3           | 3                    | 12             | 4.1                   | 611    | 69098  | 5.7 | Eukaryotic translation initiation factor 4B                                                                                       |
| 2075 | Q8N3F8           | 3                    | 3              | 4.1                   | 863    | 93441  | 7.2 | MICAL-like protein 1                                                                                                              |
| 2076 | Q93063-2         | 3                    | 6              | 4                     | 728    | 83598  | 6.4 | Isoform 2 of Q93063                                                                                                               |
| 2077 | Q0VG75           | 3                    | 5              | 3.9                   | 1124   | 127436 | 5.1 | Exportin 4                                                                                                                        |
| 2077 | Q9C0E2           | 3                    | 5              | 3.8                   | 1151   | 130139 | 5   | Exportin-4                                                                                                                        |
| 2078 | Q13488           | 3                    | 13             | 3.9                   | 830    | 92998  | 7   | Vacuolar proton translocating ATPase 116 kDa subunit a isoform 3                                                                  |
| 2078 | Q8WVC5           | 3                    | 13             | 3.9                   | 830    | 92968  | 7.1 | T-cell, immune regulator 1, ATPase, H <sup>+</sup> transporting, lysosomal V0 subunit A3                                          |
| 2079 | Q5H8A4-4         | 3                    | 5              | 8.2                   | 463    | 51267  | 7.6 | Isoform 4 of Q5H8A4                                                                                                               |
| 2079 | Q5H8A4           | 3                    | 5              | 3.9                   | 983    | 108173 | 7.1 | GPI ethanolamine phosphate transferase 2                                                                                          |
| 2079 | UPI000006FDE7    | 3                    | 5              | 3.9                   | 975    | 107284 | 7.3 | GPI7 protein                                                                                                                      |
| 2079 | Q5H8A4-2         | 3                    | 5              | 3.9                   | 975    | 107376 | 7.2 | Isoform 2 of Q5H8A4                                                                                                               |
| 2080 | UPI00004C2784    | 3                    | 4              | 3.9                   | 1506   | 164886 | 8.2 | CLIP-associating protein 2                                                                                                        |
| 2081 | O75150           | 3                    | 4              | 3.8                   | 1001   | 113678 | 6.3 | E3 ubiquitin-protein ligase BRE1B                                                                                                 |
| 2081 | UPI000013D2CF    | 3                    | 4              | 3.8                   | 1001   | 113650 | 6.2 | Ubiquitin-protein ligase BRE1B (EC 6.3.2.-) (BRE1-B) (RING finger protein 40) (95 kDa retinoblastoma-associated protein) (RBP95). |
| 2082 | Q5T8P6-5         | 3                    | 3              | 6.9                   | 534    | 60007  | 8.9 | Isoform 5 of Q5T8P6                                                                                                               |
| 2082 | Q5T8P6-4         | 3                    | 3              | 6.6                   | 558    | 62580  | 9.1 | Isoform 4 of Q5T8P6                                                                                                               |
| 2082 | Q5T8P6-3         | 3                    | 3              | 3.8                   | 980    | 110666 | 9.1 | Isoform 3 of Q5T8P6                                                                                                               |
| 2083 | Q8N3L8           | 3                    | 12             | 3.8                   | 1061   | 112497 | 7.4 | Hypothetical protein DKFZp761H0722                                                                                                |
| 2084 | Q8N596           | 3                    | 4              | 3.8                   | 811    | 90794  | 6.8 | Oxysterol binding protein-like 5                                                                                                  |
| 2084 | UPI0000366761    | 3                    | 4              | 3.8                   | 821    | 91898  | 6.9 | Oxysterol-binding protein-related protein 5 (OSBP-related protein 5) (ORP-5).                                                     |
| 2084 | UPI00001AF3AD    | 3                    | 4              | 3.5                   | 889    | 99721  | 7.6 | Oxysterol-binding protein-related protein 5 (OSBP-related protein 5) (ORP-5).                                                     |
| 2084 | Q9H0X9           | 3                    | 4              | 3.5                   | 879    | 98617  | 7.5 | Oxysterol-binding protein-related protein 5                                                                                       |
| 2085 | Q6DHz8           | 3                    | 9              | 3.7                   | 1102   | 123447 | 7.4 | Activity-dependent neuroprotector                                                                                                 |
| 2085 | Q9H2P0           | 3                    | 9              | 3.7                   | 1102   | 123563 | 7.3 | Activity-dependent neuroprotector                                                                                                 |



| No.  | Accession Number | Unique Peptide Count | Spectrum Count | Sequence Coverage (%) | Length | MolWt  | pI  | Descriptive Name                                                                                                                                                                   |
|------|------------------|----------------------|----------------|-----------------------|--------|--------|-----|------------------------------------------------------------------------------------------------------------------------------------------------------------------------------------|
| 2086 | Q96L67           | 3                    | 4              | 4.3                   | 948    | 108513 | 5   | Nardilysin                                                                                                                                                                         |
| 2086 | O43847           | 3                    | 4              | 3.6                   | 1150   | 131571 | 5   | Nardilysin precursor                                                                                                                                                               |
| 2086 | UPI0000458A54    | 3                    | 4              | 3.6                   | 1151   | 131700 | 5   | Nardilysin precursor (EC 3.4.24.61) (N-arginine dibasic convertase) (NRD convertase) (NRD-C).                                                                                      |
| 2086 | UPI00004561DA    | 3                    | 4              | 3.6                   | 1150   | 131572 | 5   | Nardilysin precursor (EC 3.4.24.61) (N-arginine dibasic convertase) (NRD convertase) (NRD-C).                                                                                      |
| 2086 | UPI000004EC94    | 3                    | 4              | 3.4                   | 1219   | 139328 | 5   | nardilysin (N-arginine dibasic convertase)                                                                                                                                         |
| 2086 | Q5VUL1           | 3                    | 4              | 3.4                   | 1219   | 139413 | 5   | Nardilysin                                                                                                                                                                         |
| 2086 | O43847-2         | 3                    | 4              | 3.4                   | 1218   | 139284 | 5   | Isoform 2 of O43847                                                                                                                                                                |
| 2087 | Q5VTR2           | 3                    | 5              | 3.6                   | 975    | 113662 | 5.9 | E3 ubiquitin-protein ligase BRE1A                                                                                                                                                  |
| 2087 | UPI000013DE3A    | 3                    | 5              | 3.6                   | 977    | 113977 | 6   | Ubiquitin-protein ligase BRE1A (EC 6.3.2.-) (BRE1-A) (hBRE1) (RING finger protein 20).                                                                                             |
| 2088 | Q9Y2U8           | 3                    | 5              | 3.6                   | 911    | 99997  | 7.5 | Inner nuclear membrane protein Man1                                                                                                                                                |
| 2089 | Q13563           | 3                    | 10             | 3.5                   | 968    | 109691 | 5.7 | Polycystin-2                                                                                                                                                                       |
| 2090 | O00267           | 3                    | 7              | 3.4                   | 1087   | 121000 | 5.1 | Transcription elongation factor SPT5                                                                                                                                               |
| 2090 | UPI0000D6179E    | 3                    | 7              | 3.4                   | 1083   | 120527 | 5.1 | Transcription elongation factor SPT5 (hSPT5) (DRB sensitivity-inducing factor large subunit) (DSIF large subunit) (DSIF p160) (Tat- cotransactivator 1 protein) (Tat-CT1 protein). |
| 2090 | UPI0000456CB7    | 3                    | 7              | 3.4                   | 1087   | 121028 | 5   | Transcription elongation factor SPT5 (hSPT5) (DRB sensitivity-inducing factor large subunit) (DSIF large subunit) (DSIF p160) (Tat- cotransactivator 1 protein) (Tat-CT1 protein). |
| 2090 | O00267-2         | 3                    | 7              | 3.4                   | 1083   | 120499 | 5.1 | Isoform 2 of O00267                                                                                                                                                                |
| 2091 | UPI000004729B    | 3                    | 8              | 3.6                   | 924    | 107568 | 8   | optic atrophy 1 isoform 2                                                                                                                                                          |
| 2091 | O60313-8         | 3                    | 8              | 3.5                   | 952    | 110721 | 7.6 | Isoform 8 of O60313                                                                                                                                                                |
| 2091 | O60313           | 3                    | 8              | 3.4                   | 960    | 111657 | 7.9 | Dynamin-like 120 kDa protein, mitochondrial precursor (Optic atrophy protein 1) [Contains: Dynamin-like 120 kDa protein, form S1]                                                  |
| 2091 | UPI000049DFC2    | 3                    | 8              | 3.4                   | 978    | 113490 | 7.8 | Dynamin-like 120 kDa protein, mitochondrial precursor (Optic atrophy protein 1) [Contains: Dynamin-like 120 kDa protein, form S1].                                                 |
| 2091 | UPI00000472A0    | 3                    | 8              | 3.4                   | 979    | 113681 | 7.9 | optic atrophy 1 isoform 6                                                                                                                                                          |
| 2091 | UPI000004729F    | 3                    | 8              | 3.4                   | 961    | 111821 | 8   | optic atrophy 1 isoform 4                                                                                                                                                          |
| 2091 | UPI000004729C    | 3                    | 8              | 3.4                   | 978    | 113517 | 7.8 | optic atrophy 1 isoform 5                                                                                                                                                          |
| 2091 | O60313-7         | 3                    | 8              | 3.4                   | 969    | 112524 | 7.5 | Isoform 7 of O60313                                                                                                                                                                |
| 2091 | O60313-4         | 3                    | 8              | 3.4                   | 977    | 113460 | 7.8 | Isoform 4 of O60313                                                                                                                                                                |
| 2091 | UPI0000422965    | 3                    | 8              | 3.3                   | 1015   | 117743 | 7.8 | Dynamin-like 120 kDa protein, mitochondrial precursor (Optic atrophy protein 1) [Contains: Dynamin-like 120 kDa protein, form S1].                                                 |

| No.  | Accession Number | Unique Peptide Count | Spectrum Count | Sequence Coverage (%) | Length | MolWt  | pI  | Descriptive Name                                                                                                                                                               |
|------|------------------|----------------------|----------------|-----------------------|--------|--------|-----|--------------------------------------------------------------------------------------------------------------------------------------------------------------------------------|
| 2091 | UPI0000422960    | 3                    | 8              | 3.3                   | 997    | 115884 | 7.9 | Dynamin-like 120 kDa protein, mitochondrial precursor (Optic atrophy protein 1) [Contains: Dynamin-like 120 kDa protein, form S1].                                             |
| 2091 | UPI00000472A1    | 3                    | 8              | 3.3                   | 1015   | 117770 | 7.8 | optic atrophy 1 isoform 8                                                                                                                                                      |
| 2091 | O60313-6         | 3                    | 8              | 3.3                   | 1014   | 117713 | 7.8 | Isoform 6 of O60313                                                                                                                                                            |
| 2091 | O60313-5         | 3                    | 8              | 3.3                   | 989    | 114975 | 7.6 | Isoform 5 of O60313                                                                                                                                                            |
| 2091 | O60313-3         | 3                    | 8              | 3.3                   | 1006   | 116777 | 7.5 | Isoform 3 of O60313                                                                                                                                                            |
| 2091 | O60313-2         | 3                    | 8              | 3.3                   | 997    | 115911 | 7.9 | Isoform 2 of O60313                                                                                                                                                            |
| 2092 | Q0VG08           | 3                    | 15             | 3.5                   | 1233   | 133629 | 7.4 | SEC24 related gene family, member B                                                                                                                                            |
| 2092 | O95487           | 3                    | 15             | 3.4                   | 1268   | 137789 | 6.7 | Protein transport protein Sec24B                                                                                                                                               |
| 2092 | UPI00004F6ED7    | 3                    | 15             | 3.4                   | 1268   | 137417 | 6.7 | SEC24 (S. cerevisiae) homolog B isoform a                                                                                                                                      |
| 2092 | UPI00001AE8CE    | 3                    | 15             | 3.4                   | 1266   | 137573 | 6.7 | Protein transport protein Sec24B (SEC24-related protein B).                                                                                                                    |
| 2093 | Q3MJA4           | 3                    | 3              | 3.4                   | 831    | 94132  | 6.8 | Solute carrier family 39 (Zinc transporter), member 10                                                                                                                         |
| 2093 | Q9ULF5           | 3                    | 3              | 3.4                   | 835    | 94559  | 6.8 | Solute carrier family 39 member 10                                                                                                                                             |
| 2093 | Q68CR5           | 3                    | 3              | 3.4                   | 831    | 94120  | 6.8 | Hypothetical protein DKFZp781L10106                                                                                                                                            |
| 2094 | Q9UFY1           | 3                    | 5              | 6.7                   | 629    | 71370  | 6   | Hypothetical protein DKFZp434N101                                                                                                                                              |
| 2094 | A2A284           | 3                    | 5              | 3.3                   | 1291   | 148660 | 6   | Phospholipase C, gamma 1                                                                                                                                                       |
| 2094 | P19174           | 3                    | 5              | 3.3                   | 1290   | 148532 | 6   | 1-phosphatidylinositol-4,5-bisphosphate phosphodiesterase gamma 1                                                                                                              |
| 2094 | UPI0000D61091    | 3                    | 5              | 3                     | 1412   | 161314 | 7.2 | 1-phosphatidylinositol-4,5-bisphosphate phosphodiesterase gamma 1 (EC 3.1.4.11) (Phosphoinositide phospholipase C) (PLC-gamma-1) (Phospholipase C-gamma-1) (PLC-II) (PLC-148). |
| 2094 | Q4LE43           | 3                    | 5              | 3                     | 1412   | 161302 | 7.2 | PLCG1 variant protein                                                                                                                                                          |
| 2095 | Q59ER0           | 3                    | 3              | 4.3                   | 1138   | 130427 | 6.4 | Rho GTPase activating protein 5 variant                                                                                                                                        |
| 2095 | Q05BU8           | 3                    | 3              | 4.1                   | 1189   | 136660 | 6.7 | Hypothetical protein                                                                                                                                                           |
| 2095 | Q05BE8           | 3                    | 3              | 3.3                   | 1502   | 172429 | 6.7 | ARHGAP5 protein                                                                                                                                                                |
| 2095 | UPI000057B85C    | 3                    | 3              | 3.3                   | 1502   | 172459 | 6.6 | Rho GTPase activating protein 5 isoform a                                                                                                                                      |
| 2095 | UPI000057B85B    | 3                    | 3              | 3.3                   | 1501   | 172331 | 6.6 | Rho GTPase activating protein 5 isoform b                                                                                                                                      |
| 2096 | O14974-4         | 3                    | 5              | 3.3                   | 971    | 109104 | 5.4 | Isoform 4 of O14974                                                                                                                                                            |
| 2096 | O14974-3         | 3                    | 5              | 3.3                   | 974    | 109728 | 5.3 | Isoform 3 of O14974                                                                                                                                                            |
| 2096 | O14974-2         | 3                    | 5              | 3.2                   | 995    | 111185 | 5.4 | Isoform 2 of O14974                                                                                                                                                            |
| 2096 | O14974           | 3                    | 5              | 3.1                   | 1030   | 115281 | 5.4 | Protein phosphatase 1 regulatory subunit 12A                                                                                                                                   |
| 2096 | Q2NKL4           | 3                    | 5              | 3.1                   | 1030   | 115281 | 5.4 | PPP1R12A protein                                                                                                                                                               |
| 2097 | Q9BUM6           | 3                    | 5              | 7.5                   | 425    | 47451  | 5.5 | COL6A2 protein                                                                                                                                                                 |
| 2097 | P12110           | 3                    | 5              | 3.1                   | 1019   | 108579 | 6.2 | Collagen alpha-2(VI) chain precursor                                                                                                                                           |
| 2098 | Q14146           | 3                    | 6              | 3.1                   | 1524   | 170569 | 7.3 | Uncharacterized protein KIAA0133                                                                                                                                               |
| 2098 | Q5VYC9           | 3                    | 6              | 3.1                   | 1524   | 170543 | 7.3 | KIAA0133                                                                                                                                                                       |
| 2099 | Q9HC35           | 3                    | 4              | 3.1                   | 981    | 108903 | 6.3 | Echinoderm microtubule-associated protein-like 4                                                                                                                               |

| No.  | Accession Number | Unique Peptide Count | Spectrum Count | Sequence Coverage (%) | Length | MolWt  | pI  | Descriptive Name                                                                                                                                                                                                                           |
|------|------------------|----------------------|----------------|-----------------------|--------|--------|-----|--------------------------------------------------------------------------------------------------------------------------------------------------------------------------------------------------------------------------------------------|
| 2099 | UPI0000140350    | 3                    | 4              | 3.1                   | 981    | 108916 | 6.4 | Echinoderm microtubule-associated protein-like 4 (EMAP-4) (Restrictedly overexpressed proliferation-associated protein) (Ropp 120).                                                                                                        |
| 2100 | O60524           | 3                    | 3              | 3                     | 1076   | 122970 | 6.3 | Serologically defined colon cancer antigen 1                                                                                                                                                                                               |
| 2100 | UPI0000246D16    | 3                    | 3              | 3                     | 1076   | 122954 | 6.3 | Serologically defined colon cancer antigen 1 (Antigen NY-CO-1).                                                                                                                                                                            |
| 2101 | Q9UDQ3           | 3                    | 3              | 4.4                   | 745    | 84397  | 5.3 | WUGSC:H_DJ0560O14.1 protein                                                                                                                                                                                                                |
| 2101 | UPI0000D61C7B    | 3                    | 3              | 3.1                   | 1071   | 121188 | 5.4 | Dihydropyridine-sensitive L-type calcium channel subunits alpha-2/delta precursor [Contains: L-type calcium channel subunit alpha-2; L-type calcium channel subunit delta].                                                                |
| 2101 | P54289           | 3                    | 3              | 3                     | 1091   | 123183 | 5.2 | Dihydropyridine-sensitive L-type calcium channel subunits alpha-2/delta precursor [Contains: L-type calcium channel subunit alpha-2; L-type calcium channel subunit delta]                                                                 |
| 2101 | Q9UIU0           | 3                    | 3              | 3                     | 1110   | 125308 | 5.4 | Dihydropyridine receptor alpha 2 subunit                                                                                                                                                                                                   |
| 2101 | Q17R45           | 3                    | 3              | 3                     | 1091   | 123183 | 5.2 | Calcium channel, voltage-dependent, alpha 2/delta subunit 1                                                                                                                                                                                |
| 2102 | Q12913           | 3                    | 7              | 3                     | 1337   | 145927 | 5.6 | Receptor-type tyrosine-protein phosphatase eta precursor                                                                                                                                                                                   |
| 2102 | UPI00004564C8    | 3                    | 7              | 3                     | 1337   | 145941 | 5.6 | Receptor-type tyrosine-protein phosphatase eta precursor (EC 3.1.3.48) (Protein-tyrosine phosphatase eta) (R-PTP-eta) (HPTP eta) (Protein- tyrosine phosphatase receptor type J) (Density-enhanced phosphatase 1) (DEP-1) (CD148 antigen). |
| 2103 | Q6WCQ1           | 3                    | 3              | 3                     | 1024   | 116446 | 6.2 | Myosin phosphatase Rho-interacting protein                                                                                                                                                                                                 |
| 2103 | UPI0000366BAD    | 3                    | 3              | 3                     | 1025   | 116533 | 6.2 | myosin phosphatase-Rho interacting protein isoform 2                                                                                                                                                                                       |
| 2103 | UPI0000200A77    | 3                    | 3              | 3                     | 1038   | 118103 | 6.4 | myosin phosphatase-Rho interacting protein isoform 1                                                                                                                                                                                       |
| 2103 | Q6WCQ1-2         | 3                    | 3              | 3                     | 1037   | 118016 | 6.4 | Isoform 2 of Q6WCQ1                                                                                                                                                                                                                        |
| 2104 | Q8IX12           | 3                    | 16             | 3                     | 1150   | 132821 | 5.8 | Cell division cycle and apoptosis regulator protein 1                                                                                                                                                                                      |
| 2105 | Q9H7L6           | 3                    | 7              | 3.6                   | 1310   | 141544 | 6.1 | FLJ00056 protein                                                                                                                                                                                                                           |
| 2105 | UPI00001FCFB7    | 3                    | 7              | 3.1                   | 1519   | 164657 | 6.1 | hypothetical protein LOC55701                                                                                                                                                                                                              |
| 2105 | Q8TER5           | 3                    | 7              | 3                     | 1546   | 167672 | 6.4 | FLJ00128 protein                                                                                                                                                                                                                           |
| 2106 | Q5VT52           | 3                    | 4              | 2.9                   | 1461   | 156019 | 7.4 | Uncharacterized protein KIAA0460                                                                                                                                                                                                           |
| 2106 | Q5VT52-3         | 3                    | 4              | 2.9                   | 1435   | 152875 | 7   | Isoform 3 of Q5VT52                                                                                                                                                                                                                        |
| 2107 | Q8TEQ8           | 3                    | 4              | 2.9                   | 1089   | 118699 | 8.1 | GPI ethanolamine phosphate transferase 3                                                                                                                                                                                                   |
| 2108 | P28290           | 3                    | 13             | 2.8                   | 1259   | 138386 | 5.2 | Sperm-specific antigen 2                                                                                                                                                                                                                   |
| 2109 | Q548W1           | 3                    | 3              | 3                     | 920    | 103012 | 6.9 | HRNT1                                                                                                                                                                                                                                      |
| 2109 | O15294           | 3                    | 3              | 2.7                   | 1046   | 116924 | 6.7 | UDP-N-acetylglucosamine--peptide N-acetylglucosaminyltransferase 110 kDa subunit                                                                                                                                                           |

| No.  | Accession Number | Unique Peptide Count | Spectrum Count | Sequence Coverage (%) | Length | MolWt  | pI  | Descriptive Name                                                                                                                                                                                                                                                |
|------|------------------|----------------------|----------------|-----------------------|--------|--------|-----|-----------------------------------------------------------------------------------------------------------------------------------------------------------------------------------------------------------------------------------------------------------------|
| 2109 | O15294-3         | 3                    | 3              | 2.7                   | 1036   | 115706 | 6.7 | Isoform 1 of O15294                                                                                                                                                                                                                                             |
| 2110 | O14981           | 3                    | 9              | 2.5                   | 1849   | 206886 | 6.5 | TATA-binding protein-associated factor 172 (EC 3.6.1.-) (ATP-dependent helicase BTAF1) (TBP-associated factor 172) (TAF-172) (TAF(II)170)                                                                                                                       |
| 2111 | Q7Z478           | 3                    | 13             | 2.5                   | 1369   | 155235 | 8.1 | Putative ATP-dependent RNA helicase DHX29                                                                                                                                                                                                                       |
| 2112 | P78357           | 3                    | 3              | 2.4                   | 1384   | 156266 | 7.1 | Contactin-associated protein 1 precursor                                                                                                                                                                                                                        |
| 2112 | UPI0000D62337    | 3                    | 3              | 2.4                   | 1384   | 156280 | 7.1 | Contactin-associated protein 1 precursor (Caspr) (Caspr1) (Neurexin 4) (Neurexin IV) (p190).                                                                                                                                                                    |
| 2113 | Q59GM0           | 3                    | 6              | 2.4                   | 1469   | 162246 | 6.7 | Nuclear receptor co-repressor 2 variant                                                                                                                                                                                                                         |
| 2113 | UPI0000E59244    | 3                    | 6              | 1.4                   | 2524   | 274674 | 7.6 | nuclear receptor co-repressor 2 isoform 1                                                                                                                                                                                                                       |
| 2113 | UPI0000E59243    | 3                    | 6              | 1.4                   | 2462   | 268358 | 7.8 | nuclear receptor co-repressor 2 isoform 2                                                                                                                                                                                                                       |
| 2113 | UPI0000D62278    | 3                    | 6              | 1.4                   | 2521   | 274528 | 7.5 | Nuclear receptor corepressor 2 (N-CoR2) (Silencing mediator of retinoic acid and thyroid hormone receptor) (SMRT) (SMRTe) (Thyroid-, retinoic-acid-receptor-associated corepressor) (T3 receptor- associating factor) (TRAC) (CTG repeat protein 26) (SMAP270). |
| 2113 | Q9Y618           | 3                    | 6              | 1.4                   | 2517   | 274032 | 8.1 | Nuclear receptor corepressor 2                                                                                                                                                                                                                                  |
| 2114 | Q96ST3           | 3                    | 7              | 2.4                   | 1273   | 145175 | 7.3 | Paired amphipathic helix protein Sin3a                                                                                                                                                                                                                          |
| 2115 | P39880           | 3                    | 5              | 2.3                   | 1505   | 164272 | 6   | Homeobox protein cut-like 1                                                                                                                                                                                                                                     |
| 2115 | UPI00004575CB    | 3                    | 5              | 2.3                   | 1494   | 163149 | 5.8 | Protein CASP.                                                                                                                                                                                                                                                   |
| 2115 | UPI0000246CDF    | 3                    | 5              | 2.3                   | 1505   | 164187 | 5.9 | Protein CASP.                                                                                                                                                                                                                                                   |
| 2115 | UPI00001A95D7    | 3                    | 5              | 2.3                   | 1505   | 164312 | 6   | CCAAT displacement protein isoform a                                                                                                                                                                                                                            |
| 2115 | P39880-5         | 3                    | 5              | 2.3                   | 1449   | 157980 | 5.8 | Isoform 6 of P39880                                                                                                                                                                                                                                             |
| 2115 | P39880-2         | 3                    | 5              | 2.3                   | 1483   | 161734 | 5.9 | Isoform 2 of P39880                                                                                                                                                                                                                                             |
| 2115 | P39880-3         | 3                    | 5              | 2.2                   | 1516   | 165687 | 5.9 | Isoform 3 of P39880                                                                                                                                                                                                                                             |
| 2116 | Q7LBC6           | 3                    | 7              | 2.3                   | 1761   | 191610 | 7.2 | JmjC domain-containing histone demethylation protein 2B                                                                                                                                                                                                         |
| 2116 | UPI000020C6A8    | 3                    | 7              | 2.3                   | 1761   | 191580 | 7.2 | JmjC domain-containing histone demethylation protein 2B (EC 1.14.11.-) (Jumonji domain-containing protein 1B) (Nuclear protein 5qNCA).                                                                                                                          |
| 2117 | Q8TCU6-3         | 3                    | 3              | 2.4                   | 1561   | 175847 | 6.8 | Isoform 3 of Q8TCU6                                                                                                                                                                                                                                             |
| 2117 | Q8TCU6           | 3                    | 3              | 2.2                   | 1659   | 186203 | 6.4 | Phosphatidylinositol 3,4,5-trisphosphate-dependent Rac exchanger 1 protein                                                                                                                                                                                      |
| 2117 | UPI000013D375    | 3                    | 3              | 2.2                   | 1659   | 186202 | 6.4 | Phosphatidylinositol 3,4,5-trisphosphate-dependent Rac exchanger 1 protein (P-Rex1 protein).                                                                                                                                                                    |
| 2118 | P42356           | 3                    | 6              | 2.1                   | 2044   | 231290 | 6.9 | Phosphatidylinositol 4-kinase alpha                                                                                                                                                                                                                             |

| No.  | Accession Number | Unique Peptide Count | Spectrum Count | Sequence Coverage (%) | Length | MolWt  | pI  | Descriptive Name                                                                                                                           |
|------|------------------|----------------------|----------------|-----------------------|--------|--------|-----|--------------------------------------------------------------------------------------------------------------------------------------------|
| 2118 | UPI00001AE78E    | 3                    | 6              | 2.1                   | 2044   | 231317 | 6.9 | Phosphatidylinositol 4-kinase alpha (EC 2.7.1.67) (PI4-kinase alpha) (PtdIns-4-kinase alpha) (PI4K-alpha).                                 |
| 2118 | Q4LE69           | 3                    | 6              | 2                     | 2121   | 238695 | 7.1 | PIK4CA variant protein                                                                                                                     |
| 2119 | Q5QD01           | 3                    | 4              | 2                     | 1581   | 180550 | 5.9 | SP-A receptor subunit SP-R210 alphaS                                                                                                       |
| 2120 | A1L4N4           | 3                    | 19             | 1.9                   | 1672   | 185545 | 6.8 | KIDINS220 protein                                                                                                                          |
| 2120 | Q9ULH0           | 3                    | 19             | 1.8                   | 1777   | 197210 | 6.7 | KIAA1250 protein                                                                                                                           |
| 2121 | Q68DX7           | 3                    | 13             | 1.9                   | 2127   | 239113 | 7   | Hypothetical protein DKFZp686E0722                                                                                                         |
| 2121 | Q7Z3K2           | 3                    | 13             | 1.9                   | 2150   | 241011 | 7.1 | CCR4-NOT transcription complex subunit 1                                                                                                   |
| 2121 | UPI00001FF2F6    | 3                    | 13             | 1.7                   | 2376   | 266937 | 7.1 | CCR4-NOT transcription complex, subunit 1 isoform a                                                                                        |
| 2122 | Q68CP7           | 3                    | 8              | 2.2                   | 1215   | 134927 | 6.6 | Hypothetical protein DKFZp781G125                                                                                                          |
| 2122 | P33527-8         | 3                    | 8              | 2                     | 1351   | 151631 | 7.6 | Isoform 8 of P33527                                                                                                                        |
| 2122 | UPI000059D323    | 3                    | 8              | 1.9                   | 1416   | 158948 | 7.4 | ATP-binding cassette, sub-family C, member 1 isoform 4                                                                                     |
| 2122 | UPI000013D386    | 3                    | 8              | 1.9                   | 1400   | 157240 | 7.5 | Multidrug resistance-associated protein 1 (ATP-binding cassette sub- family C member 1) (Leukotriene C(4) transporter) (LTC4 transporter). |
| 2122 | UPI000013D384    | 3                    | 8              | 1.9                   | 1456   | 163262 | 7.7 | Multidrug resistance-associated protein 1 (ATP-binding cassette sub- family C member 1) (Leukotriene C(4) transporter) (LTC4 transporter). |
| 2122 | UPI000013D383    | 3                    | 8              | 1.9                   | 1459   | 163861 | 7   | Multidrug resistance-associated protein 1 (ATP-binding cassette sub- family C member 1) (Leukotriene C(4) transporter) (LTC4 transporter). |
| 2122 | UPI000013D381    | 3                    | 8              | 1.9                   | 1450   | 162595 | 7.4 | Multidrug resistance-associated protein 1 (ATP-binding cassette sub- family C member 1) (Leukotriene C(4) transporter) (LTC4 transporter). |
| 2122 | Q9UQ98           | 3                    | 8              | 1.9                   | 1400   | 157210 | 7.5 | Multidrug resistance protein                                                                                                               |
| 2122 | P33527-7         | 3                    | 8              | 1.9                   | 1410   | 158251 | 7.1 | Isoform 7 of P33527                                                                                                                        |
| 2122 | P33527-6         | 3                    | 8              | 1.9                   | 1407   | 157652 | 7.8 | Isoform 6 of P33527                                                                                                                        |
| 2122 | A3RJX2           | 3                    | 8              | 1.8                   | 1531   | 171590 | 7.1 | ATP-binding cassette, sub-family C (CFTR/MRP), member 1                                                                                    |
| 2122 | UPI000059D326    | 3                    | 8              | 1.8                   | 1472   | 164970 | 7.6 | ATP-binding cassette, sub-family C, member 1 isoform 2                                                                                     |
| 2122 | UPI000059D325    | 3                    | 8              | 1.8                   | 1466   | 164303 | 7.3 | ATP-binding cassette, sub-family C, member 1 isoform 5                                                                                     |
| 2122 | UPI00004091AF    | 3                    | 8              | 1.8                   | 1475   | 165569 | 6.9 | ATP-binding cassette, sub-family C, member 1 isoform 3                                                                                     |
| 2122 | UPI00001604C7    | 3                    | 8              | 1.8                   | 1482   | 166166 | 7.3 | ATP-binding cassette, sub-family C, member 1 isoform 7                                                                                     |
| 2122 | UPI00001604C6    | 3                    | 8              | 1.8                   | 1489   | 166653 | 7.4 | ATP-binding cassette, sub-family C, member 1 isoform 6                                                                                     |

| No.  | Accession Number | Unique Peptide Count | Spectrum Count | Sequence Coverage (%) | Length | MolWt  | pI  | Descriptive Name                                                                                                                                                                                                                                                                                                                                                                            |
|------|------------------|----------------------|----------------|-----------------------|--------|--------|-----|---------------------------------------------------------------------------------------------------------------------------------------------------------------------------------------------------------------------------------------------------------------------------------------------------------------------------------------------------------------------------------------------|
| 2122 | UPI000013D385    | 3                    | 8              | 1.8                   | 1473   | 164975 | 7.6 | Multidrug resistance-associated protein 1 (ATP-binding cassette sub- family C member 1) (Leukotriene C(4) transporter) (LTC4 transporter).                                                                                                                                                                                                                                                  |
| 2122 | UPI000013D382    | 3                    | 8              | 1.8                   | 1466   | 164488 | 7.4 | Multidrug resistance-associated protein 1 (ATP-binding cassette sub- family C member 1) (Leukotriene C(4) transporter) (LTC4 transporter).                                                                                                                                                                                                                                                  |
| 2122 | UPI000013D380    | 3                    | 8              | 1.8                   | 1515   | 169882 | 7.2 | Multidrug resistance-associated protein 1 (ATP-binding cassette sub- family C member 1) (Leukotriene C(4) transporter) (LTC4 transporter).                                                                                                                                                                                                                                                  |
| 2122 | P33527-9         | 3                    | 8              | 1.8                   | 1541   | 172609 | 6.8 | Isoform 9 of P33527                                                                                                                                                                                                                                                                                                                                                                         |
| 2122 | P33527-4         | 3                    | 8              | 1.8                   | 1466   | 164273 | 7.3 | Isoform 4 of P33527                                                                                                                                                                                                                                                                                                                                                                         |
| 2122 | P33527-3         | 3                    | 8              | 1.8                   | 1475   | 165538 | 6.9 | Isoform 3 of P33527                                                                                                                                                                                                                                                                                                                                                                         |
| 2122 | P33527-2         | 3                    | 8              | 1.8                   | 1472   | 164940 | 7.6 | Isoform 2 of P33527                                                                                                                                                                                                                                                                                                                                                                         |
| 2122 | P33527           | 3                    | 8              | 1.8                   | 1531   | 171560 | 7.1 | Multidrug resistance-associated protein 1 (ATP-binding cassette sub- family C member 1) (Leukotriene C(4) transporter)                                                                                                                                                                                                                                                                      |
| 2123 | P12883           | 3                    | 3              | 1.8                   | 1935   | 223095 | 5.8 | Myosin-7                                                                                                                                                                                                                                                                                                                                                                                    |
| 2123 | UPI0000D623D8    | 3                    | 3              | 1.8                   | 1940   | 223470 | 5.8 | Myosin heavy chain, cardiac muscle beta isoform (MyHC-beta).                                                                                                                                                                                                                                                                                                                                |
| 2124 | O14578           | 3                    | 3              | 1.7                   | 2027   | 231429 | 6.6 | Citron Rho-interacting kinase                                                                                                                                                                                                                                                                                                                                                               |
| 2124 | Q2M5E1           | 3                    | 3              | 1.7                   | 2069   | 236605 | 6.7 | Citron                                                                                                                                                                                                                                                                                                                                                                                      |
| 2125 | O14646           | 3                    | 5              | 1.7                   | 1709   | 196517 | 7.2 | Chromodomain-helicase-DNA-binding protein 1                                                                                                                                                                                                                                                                                                                                                 |
| 2125 | UPI000013DD75    | 3                    | 5              | 1.7                   | 1710   | 196687 | 7.1 | chromodomain helicase DNA binding protein 1                                                                                                                                                                                                                                                                                                                                                 |
| 2125 | Q17RZ3           | 3                    | 5              | 1.7                   | 1709   | 196589 | 7.1 | Chromodomain helicase DNA binding protein 1                                                                                                                                                                                                                                                                                                                                                 |
| 2126 | Q8IVF4           | 3                    | 4              | 1.7                   | 3051   | 349503 | 5.9 | Ciliary dynein heavy chain 10                                                                                                                                                                                                                                                                                                                                                               |
| 2127 | O95071           | 3                    | 3              | 1.6                   | 2799   | 309352 | 5.8 | E3 ubiquitin-protein ligase EDD1                                                                                                                                                                                                                                                                                                                                                            |
| 2127 | UPI000052A0EC    | 3                    | 3              | 1.6                   | 2796   | 309192 | 6.1 | PREDICTED: similar to E3 ubiquitin protein ligase, HECT domain containing, 1                                                                                                                                                                                                                                                                                                                |
| 2127 | UPI00004576D7    | 3                    | 3              | 1.6                   | 2798   | 309307 | 5.9 | Ubiquitin-protein ligase EDD1 (EC 6.3.2.-) (Hyperplastic discs protein homolog) (hHYD) (Progesterin-induced protein).                                                                                                                                                                                                                                                                       |
| 2128 | P51610           | 3                    | 5              | 1.5                   | 2035   | 208840 | 7.5 | Host cell factor (HCF) (HCF-1) (C1 factor) (VP16 accessory protein) (VCAF) (CFF) [Contains: HCF N-terminal chain 1; HCF N-terminal chain 2; HCF N-terminal chain 3; HCF N-terminal chain 4; HCF N-terminal chain 5; HCF N-terminal chain 6; HCF C-terminal chain 1; HCF C-terminal chain 2; HCF C-terminal chain 3; HCF C-terminal chain 4; HCF C-terminal chain 5; HCF C-terminal chain 6] |

| No.  | Accession Number | Unique Peptide Count | Spectrum Count | Sequence Coverage (%) | Length | MolWt  | pI  | Descriptive Name                                                                                                                                                                                                                                                                            |
|------|------------------|----------------------|----------------|-----------------------|--------|--------|-----|---------------------------------------------------------------------------------------------------------------------------------------------------------------------------------------------------------------------------------------------------------------------------------------------|
| 2128 | UPI000059DBED    | 3                    | 5              | 1.5                   | 1980   | 202848 | 7.1 | Host cell factor (HCF) (HCF-1) (C1 factor) (VP16 accessory protein) (VCAF) (CFF) [Contains: HCF N-terminal chain 1; HCF N-terminal chain 2; HCF N-terminal chain 3; HCF N-terminal chain 4; HCF N-terminal chain 5; HCF N-terminal chain 6; HCF C-terminal chain 6; HCF C-terminal chain 6] |
| 2128 | UPI000059DBEB    | 3                    | 5              | 1.5                   | 1936   | 198175 | 7.2 | Host cell factor (HCF) (HCF-1) (C1 factor) (VP16 accessory protein) (VCAF) (CFF) [Contains: HCF N-terminal chain 1; HCF N-terminal chain 2; HCF N-terminal chain 3; HCF N-terminal chain 4; HCF N-terminal chain 5; HCF N-terminal chain 6; HCF C-terminal chain 6; HCF C-terminal chain 6] |
| 2128 | UPI000036779B    | 3                    | 5              | 1.5                   | 1966   | 201848 | 7.5 | Host cell factor (HCF) (HCF-1) (C1 factor) (VP16 accessory protein) (VCAF) (CFF) [Contains: HCF N-terminal chain 1; HCF N-terminal chain 2; HCF N-terminal chain 3; HCF N-terminal chain 4; HCF N-terminal chain 5; HCF N-terminal chain 6; HCF C-terminal chain 6; HCF C-terminal chain 6] |
| 2128 | UPI0000142F1F    | 3                    | 5              | 1.5                   | 2035   | 208730 | 7.5 | host cell factor 1                                                                                                                                                                                                                                                                          |
| 2128 | P51610-2         | 3                    | 5              | 1.5                   | 1966   | 201957 | 7.5 | Isoform 2 of P51610                                                                                                                                                                                                                                                                         |
| 2129 | Q59EW8           | 3                    | 3              | 2.6                   | 1310   | 152553 | 5.6 | Golgi autoantigen, golgin subfamily a, 4 variant                                                                                                                                                                                                                                            |
| 2129 | UPI0000367131    | 3                    | 3              | 1.6                   | 2184   | 255638 | 5.4 | Golgin subfamily A member 4 (Trans-Golgi p230) (256 kDa golgin) (Golgin-245) (Protein 72.1).                                                                                                                                                                                                |
| 2129 | Q13439-2         | 3                    | 3              | 1.6                   | 2185   | 255737 | 5.4 | Isoform 2 of Q13439                                                                                                                                                                                                                                                                         |
| 2129 | Q13439           | 3                    | 3              | 1.5                   | 2230   | 261137 | 5.4 | Golgin subfamily A member 4                                                                                                                                                                                                                                                                 |
| 2129 | Q13439-4         | 3                    | 3              | 1.5                   | 2228   | 260948 | 5.4 | Isoform 4 of Q13439                                                                                                                                                                                                                                                                         |
| 2129 | Q13439-3         | 3                    | 3              | 1.5                   | 2223   | 260322 | 5.4 | Isoform 3 of Q13439                                                                                                                                                                                                                                                                         |
| 2130 | UPI0000E8AC98    | 3                    | 15             | 1.5                   | 2610   | 289383 | 5.4 | HECT domain containing 1                                                                                                                                                                                                                                                                    |
| 2131 | P23471-2         | 3                    | 6              | 2.2                   | 1454   | 163443 | 5.2 | Isoform Short of P23471                                                                                                                                                                                                                                                                     |
| 2131 | P23471           | 3                    | 6              | 1.4                   | 2314   | 254528 | 4.9 | Receptor-type tyrosine-protein phosphatase zeta precursor                                                                                                                                                                                                                                   |
| 2132 | UPI000016001C    | 3                    | 4              | 1.6                   | 2288   | 259840 | 6.8 | transcriptional regulator ATRX isoform 3                                                                                                                                                                                                                                                    |
| 2132 | UPI0000D61D94    | 3                    | 4              | 1.5                   | 2424   | 274983 | 6.4 | Transcriptional regulator ATRX (EC 3.6.1.-) (ATP-dependent helicase ATRX) (X-linked helicase II) (X-linked nuclear protein) (XNP) (Znf- HX).                                                                                                                                                |
| 2132 | UPI000016001B    | 3                    | 4              | 1.5                   | 2454   | 278226 | 6.5 | transcriptional regulator ATRX isoform 2                                                                                                                                                                                                                                                    |
| 2132 | P46100-4         | 3                    | 4              | 1.5                   | 2454   | 278206 | 6.6 | Isoform 3 of P46100                                                                                                                                                                                                                                                                         |
| 2132 | P46100-3         | 3                    | 4              | 1.5                   | 2375   | 269789 | 7   | Isoform 2 of P46100                                                                                                                                                                                                                                                                         |
| 2132 | P46100           | 3                    | 4              | 1.4                   | 2492   | 282564 | 6.6 | Transcriptional regulator ATRX                                                                                                                                                                                                                                                              |
| 2132 | UPI0000DD8684    | 3                    | 4              | 1.4                   | 2493   | 282810 | 6.6 | PREDICTED: similar to transcriptional regulator ATRX isoform 1                                                                                                                                                                                                                              |
| 2132 | UPI0000161F78    | 3                    | 4              | 1.4                   | 2492   | 282584 | 6.6 | transcriptional regulator ATRX isoform 1                                                                                                                                                                                                                                                    |
| 2133 | O94915           | 3                    | 6              | 1.3                   | 3013   | 339598 | 5.6 | Protein furry homolog-like                                                                                                                                                                                                                                                                  |

| No.  | Accession Number | Unique Peptide Count | Spectrum Count | Sequence Coverage (%) | Length | MolWt  | pI   | Descriptive Name                                                                                                                                                                                        |
|------|------------------|----------------------|----------------|-----------------------|--------|--------|------|---------------------------------------------------------------------------------------------------------------------------------------------------------------------------------------------------------|
| 2134 | Q02224           | 3                    | 3              | 1.3                   | 2663   | 312089 | 5.6  | Centromeric protein E                                                                                                                                                                                   |
| 2134 | UPI0000D615A1    | 3                    | 3              | 1.3                   | 2585   | 302383 | 5.6  | centromere protein E                                                                                                                                                                                    |
| 2134 | UPI000020B28A    | 3                    | 3              | 1.3                   | 2701   | 316414 | 5.6  | centromere protein E                                                                                                                                                                                    |
| 2134 | Q4LE75           | 3                    | 3              | 1.3                   | 2585   | 302323 | 5.6  | CENPE variant protein                                                                                                                                                                                   |
| 2135 | Q6AI22           | 3                    | 6              | 1.1                   | 2810   | 318870 | 5    | Hypothetical protein DKFZp686H16106                                                                                                                                                                     |
| 2135 | Q9NU22           | 3                    | 6              | 0.6                   | 5596   | 632827 | 5.7  | Midasin                                                                                                                                                                                                 |
| 2136 | Q8WXH0           | 3                    | 3              | 0.5                   | 6885   | 796457 | 5.4  | Nesprin-2                                                                                                                                                                                               |
| 2136 | Q8WXH0-2         | 3                    | 3              | 0.5                   | 6907   | 798877 | 5.4  | Isoform 2 of Q8WXH0                                                                                                                                                                                     |
| 2137 | Q15149-4         | 2                    | 17             | 57                    | 4547   | 516174 | 5.8  | Isoform 4 of Q15149                                                                                                                                                                                     |
| 2137 | UPI0000233FD1    | 2                    | 17             | 57                    | 4547   | 516204 | 5.8  | plectin 1 isoform 11                                                                                                                                                                                    |
| 2138 | Q96G68           | 2                    | 19             | 48.7                  | 39     | 4414   | 9.7  | C1orf151 protein                                                                                                                                                                                        |
| 2139 | P12235           | 2                    | 11             | 47.7                  | 298    | 33064  | 9.8  | ADP/ATP translocase 1                                                                                                                                                                                   |
| 2140 | Q3LIF5           | 2                    | 25             | 46.7                  | 1018   | 110665 | 4.1  | Nestin                                                                                                                                                                                                  |
| 2141 | A2Q118           | 2                    | 13             | 44                    | 273    | 31636  | 5.8  | MHC class I antigen                                                                                                                                                                                     |
| 2141 | A2VBZ9           | 2                    | 13             | 44                    | 273    | 31799  | 6.1  | MHC class I antigen                                                                                                                                                                                     |
| 2142 | Q9HB66           | 2                    | 12             | 41.3                  | 63     | 7264   | 9.6  | PNAS-117                                                                                                                                                                                                |
| 2143 | Q71UM5           | 2                    | 20             | 39.3                  | 84     | 9477   | 9.5  | 40S ribosomal protein S27-like protein                                                                                                                                                                  |
| 2143 | UPI000049DDE1    | 2                    | 20             | 33                    | 100    | 11346  | 9.3  | 40S ribosomal protein S27-like protein.                                                                                                                                                                 |
| 2144 | O94925-3         | 2                    | 6              | 38.8                  | 598    | 65460  | 7.9  | Isoform GAC of O94925                                                                                                                                                                                   |
| 2145 | Q9UDW1           | 2                    | 12             | 38.1                  | 63     | 7308   | 9.5  | Ubiquinol-cytochrome c reductase complex 7.2 kDa protein                                                                                                                                                |
| 2146 | Q9Y5U9           | 2                    | 16             | 34.1                  | 82     | 8969   | 8.3  | Immediate early response 3-interacting protein 1                                                                                                                                                        |
| 2147 | Q14240           | 2                    | 2              | 33.9                  | 407    | 46402  | 5.5  | Eukaryotic initiation factor 4A-II                                                                                                                                                                      |
| 2147 | Q14240-2         | 2                    | 2              | 33.8                  | 408    | 46489  | 5.5  | Isoform 2 of Q14240                                                                                                                                                                                     |
| 2148 | UPI00004576A1    | 2                    | 15             | 33.3                  | 144    | 16384  | 8    | Ubiquitin-conjugating enzyme E2 variant 2 (MMS2) (Enterocyte differentiation-associated factor EDAF-1) (Enterocyte differentiation-promoting factor) (EDPF-1) (Vitamin D3-inducible protein) (DDVit 1). |
| 2148 | Q15819           | 2                    | 15             | 33.1                  | 145    | 16363  | 8    | Ubiquitin-conjugating enzyme E2 variant 2                                                                                                                                                               |
| 2149 | O43504           | 2                    | 5              | 33                    | 91     | 9614   | 4.9  | Hepatitis B virus X-interacting protein                                                                                                                                                                 |
| 2149 | UPI0000205288    | 2                    | 5              | 17.3                  | 173    | 18158  | 5.5  | hepatitis B virus x-interacting protein                                                                                                                                                                 |
| 2150 | P16104           | 2                    | 19             | 32.9                  | 143    | 15145  | 10.7 | Histone H2A.x                                                                                                                                                                                           |
| 2151 | Q8WVE3           | 2                    | 5              | 32.9                  | 85     | 9509   | 5.9  | MGC13017 protein                                                                                                                                                                                        |
| 2151 | Q96HQ2           | 2                    | 5              | 24.1                  | 116    | 13196  | 5    | Similar to RIKEN cDNA A430101B06 gene                                                                                                                                                                   |
| 2152 | Q9NPE3           | 2                    | 17             | 32.8                  | 64     | 7706   | 10   | H/ACA ribonucleoprotein complex subunit 3                                                                                                                                                               |
| 2153 | UPI000013ED5D    | 2                    | 7              | 32.6                  | 129    | 14687  | 10   | PREDICTED: similar to ribosomal protein S15a                                                                                                                                                            |
| 2154 | P59768           | 2                    | 11             | 32.4                  | 71     | 7850   | 8    | Guanine nucleotide-binding protein G(I)/G(S)/G(O) gamma-2 subunit precursor                                                                                                                             |
| 2155 | P61970           | 2                    | 11             | 32.3                  | 127    | 14478  | 5.4  | Nuclear transport factor 2                                                                                                                                                                              |
| 2156 | Q85KX8           | 2                    | 19             | 32.2                  | 227    | 25575  | 4.8  | Cytochrome oxidase subunit II                                                                                                                                                                           |
| 2157 | UPI0000140BDB    | 2                    | 2              | 31.2                  | 462    | 50154  | 9    | UPI0000140BDB UniRef100 entry                                                                                                                                                                           |
| 2158 | Q9BT73           | 2                    | 4              | 30.3                  | 122    | 13104  | 7.9  | Uncharacterized protein C7orf48                                                                                                                                                                         |
| 2159 | Q9HB72           | 2                    | 3              | 30.3                  | 76     | 8468   | 10.2 | PNAS-106                                                                                                                                                                                                |
| 2159 | Q9Y5V0           | 2                    | 3              | 30.3                  | 76     | 8498   | 10   | Zinc finger protein 706                                                                                                                                                                                 |



| No.  | Accession Number | Unique Peptide Count | Spectrum Count | Sequence Coverage (%) | Length | MolWt | pI   | Descriptive Name                                                                                                                       |
|------|------------------|----------------------|----------------|-----------------------|--------|-------|------|----------------------------------------------------------------------------------------------------------------------------------------|
| 2160 | UPI000006FE7A    | 2                    | 3              | 30.1                  | 156    | 17967 | 9.5  | PREDICTED: similar to ubiquitin and ribosomal protein S27a precursor                                                                   |
| 2161 | P62875           | 2                    | 14             | 29.9                  | 67     | 7645  | 7.8  | DNA-directed RNA polymerase II 7.6 kDa polypeptide                                                                                     |
| 2162 | UPI0000161022    | 2                    | 2              | 29.9                  | 157    | 17722 | 10.5 | PREDICTED: similar to 60S ribosomal protein L23a                                                                                       |
| 2163 | Q6FG99           | 2                    | 33             | 29.8                  | 114    | 11568 | 4.4  | RPLP1 protein                                                                                                                          |
| 2164 | UPI00001975C1    | 2                    | 12             | 29.5                  | 176    | 20867 | 10.8 | PREDICTED: similar to ribosomal protein L18a                                                                                           |
| 2165 | Q9H3K6           | 2                    | 8              | 29.1                  | 86     | 10117 | 6.5  | BolA-like protein 2                                                                                                                    |
| 2166 | Q13015           | 2                    | 10             | 28.9                  | 90     | 10061 | 4.5  | Protein AF1q                                                                                                                           |
| 2167 | Q5T123           | 2                    | 61             | 28.4                  | 88     | 9380  | 9.4  | SH3 domain binding glutamic acid-rich protein like 3                                                                                   |
| 2167 | Q9H299           | 2                    | 61             | 26.9                  | 93     | 10438 | 4.9  | SH3 domain-binding glutamic acid-rich-like protein 3                                                                                   |
| 2167 | UPI0000D61E9C    | 2                    | 61             | 11.1                  | 225    | 23699 | 9.1  | SH3 domain-binding glutamic acid-rich-like protein 3 (SH3 domain-binding protein 1) (SH3BP-1).                                         |
| 2167 | Q86Z22           | 2                    | 61             | 11.1                  | 226    | 23838 | 9.1  | Hypothetical protein                                                                                                                   |
| 2168 | O14907           | 2                    | 6              | 28.2                  | 124    | 13735 | 8.5  | Tax1-binding protein 3                                                                                                                 |
| 2169 | Q8NI22           | 2                    | 4              | 28.1                  | 146    | 16390 | 4.6  | Multiple coagulation factor deficiency protein 2 precursor                                                                             |
| 2170 | O15523           | 2                    | 2              | 28                    | 660    | 73154 | 7.6  | ATP-dependent RNA helicase DDX3Y                                                                                                       |
| 2171 | P14406           | 2                    | 23             | 27.7                  | 83     | 9396  | 9.7  | Cytochrome c oxidase polypeptide VIIa-liver/heart, mitochondrial precursor                                                             |
| 2171 | Q49610           | 2                    | 23             | 27.7                  | 83     | 9426  | 9.6  | Cytochrome c oxidase subunit VIIa polypeptide 2                                                                                        |
| 2171 | UPI000015A446    | 2                    | 23             | 20                    | 115    | 12844 | 9.1  | Cytochrome c oxidase polypeptide VIIa-liver/heart, mitochondrial precursor (EC 1.9.3.1) (Cytochrome c oxidase subunit VIIa-L) (VIIaL). |
| 2172 | Q567R0           | 2                    | 11             | 29.4                  | 85     | 9953  | 5.5  | UQCRH protein                                                                                                                          |
| 2172 | P07919           | 2                    | 11             | 27.5                  | 91     | 10739 | 4.4  | Ubiquinol-cytochrome c reductase complex 11 kDa protein, mitochondrial precursor                                                       |
| 2173 | Q86XF3           | 2                    | 18             | 38.8                  | 67     | 7371  | 4.9  | LSM8 protein                                                                                                                           |
| 2173 | O95777           | 2                    | 18             | 27.1                  | 96     | 10403 | 4.5  | U6 snRNA-associated Sm-like protein LSm8                                                                                               |
| 2174 | P62879           | 2                    | 14             | 27.1                  | 340    | 37331 | 6    | Guanine nucleotide-binding protein G(I)/G(S)/G(T) subunit beta 2                                                                       |
| 2175 | P62273           | 2                    | 9              | 26.8                  | 56     | 6677  | 10.1 | 40S ribosomal protein S29                                                                                                              |
| 2176 | O75380           | 2                    | 6              | 26.6                  | 124    | 13712 | 8.3  | NADH dehydrogenase [ubiquinone] iron-sulfur protein 6, mitochondrial precursor                                                         |
| 2177 | Q969Q0           | 2                    | 8              | 26.4                  | 106    | 12469 | 10.7 | 60S ribosomal protein L36a-like                                                                                                        |
| 2178 | Q9Y547           | 2                    | 5              | 25.7                  | 144    | 16297 | 5    | Placental protein 25                                                                                                                   |
| 2179 | Q6FIE5           | 2                    | 5              | 25.6                  | 125    | 13792 | 6.1  | PHP14 protein                                                                                                                          |
| 2179 | Q9NRX4           | 2                    | 5              | 25.6                  | 125    | 13833 | 6.1  | 14 kDa phosphohistidine phosphatase                                                                                                    |
| 2179 | UPI0000DD5CDC    | 2                    | 5              | 22.2                  | 144    | 16144 | 6.4  | 14 kDa phosphohistidine phosphatase                                                                                                    |
| 2180 | UPI000041A257    | 2                    | 90             | 43.6                  | 55     | 6295  | 8.9  | ATP synthase, H <sup>+</sup> transporting, mitochondrial F0 complex, subunit F2 isoform 2c                                             |
| 2180 | P56134-2         | 2                    | 90             | 27.3                  | 88     | 10363 | 9.9  | Isoform 2 of P56134                                                                                                                    |

| No.  | Accession Number | Unique Peptide Count | Spectrum Count | Sequence Coverage (%) | Length | MolWt | pI   | Descriptive Name                                                                                                                                       |
|------|------------------|----------------------|----------------|-----------------------|--------|-------|------|--------------------------------------------------------------------------------------------------------------------------------------------------------|
| 2180 | P56134           | 2                    | 90             | 25.5                  | 94     | 10918 | 9.7  | ATP synthase f chain, mitochondrial                                                                                                                    |
| 2181 | Q49AN9           | 2                    | 42             | 29.7                  | 64     | 7101  | 7.2  | SNRPG protein                                                                                                                                          |
| 2181 | P62308           | 2                    | 42             | 25                    | 76     | 8496  | 8.9  | Small nuclear ribonucleoprotein G                                                                                                                      |
| 2182 | Q8TBQ9           | 2                    | 26             | 25                    | 72     | 8060  | 9    | Transmembrane protein 167 precursor                                                                                                                    |
| 2183 | P63172           | 2                    | 13             | 24.8                  | 113    | 12452 | 5.1  | Dynein light chain Tctex-type 1                                                                                                                        |
| 2184 | O15155           | 2                    | 8              | 24.6                  | 118    | 13289 | 9.1  | BET1 homolog                                                                                                                                           |
| 2185 | P09972           | 2                    | 14             | 24.5                  | 364    | 39456 | 6.9  | Fructose-bisphosphate aldolase C                                                                                                                       |
| 2186 | O95139           | 2                    | 5              | 24.2                  | 128    | 15489 | 9.6  | NADH dehydrogenase [ubiquinone] 1 beta subcomplex subunit 6                                                                                            |
| 2187 | Q9NPA8           | 2                    | 5              | 23.8                  | 101    | 11529 | 9.3  | Enhancer of yellow 2 homolog                                                                                                                           |
| 2187 | UPI0000503EA4    | 2                    | 5              | 23.8                  | 101    | 11526 | 9.3  | enhancer of yellow 2 homolog                                                                                                                           |
| 2188 | P51808           | 2                    | 14             | 23.3                  | 116    | 13062 | 5.7  | Dynein light chain Tctex-type 3                                                                                                                        |
| 2188 | UPI0000211E80    | 2                    | 14             | 17.8                  | 152    | 16979 | 5.9  | Dynein light chain Tctex-type 3 (T-complex-associated testis-expressed 1-like) (Protein 91/23).                                                        |
| 2189 | UPI00001FD8B2    | 2                    | 6              | 31.5                  | 73     | 8322  | 9.5  | Acylphosphatase-1 (EC 3.6.1.7) (Acylphosphate phosphohydrolase 1) (Acylphosphatase, organ-common type isozyme) (Acylphosphatase, erythrocyte isozyme). |
| 2189 | P07311           | 2                    | 6              | 23.2                  | 99     | 11261 | 9.3  | Acylphosphatase-1                                                                                                                                      |
| 2190 | UPI000013CABC    | 2                    | 39             | 23.2                  | 164    | 18111 | 6.9  | PREDICTED: similar to peptidylprolyl isomerase A isoform 1                                                                                             |
| 2191 | P82921           | 2                    | 13             | 23                    | 87     | 10742 | 10.2 | Mitochondrial 28S ribosomal protein S21                                                                                                                |
| 2192 | O60220           | 2                    | 8              | 22.7                  | 97     | 10998 | 5.2  | Mitochondrial import inner membrane translocase subunit Tim8 A                                                                                         |
| 2193 | Q9NU23           | 2                    | 4              | 22.7                  | 88     | 10449 | 10.5 | LYR motif-containing protein 2                                                                                                                         |
| 2194 | UPI000013EB83    | 2                    | 10             | 22.6                  | 376    | 42003 | 5.6  | hypothetical protein LOC345651                                                                                                                         |
| 2195 | Q9Y6H1           | 2                    | 5              | 22.5                  | 151    | 15513 | 9.2  | Coiled-coil-helix-coiled-coil-helix domain-containing protein 2                                                                                        |
| 2196 | P00167-2         | 2                    | 5              | 30.6                  | 98     | 11268 | 5.1  | Isoform 2 of P00167                                                                                                                                    |
| 2196 | Q59F44           | 2                    | 5              | 22.7                  | 132    | 14572 | 5.7  | Cytochrome b-5 isoform 1 variant                                                                                                                       |
| 2196 | P00167           | 2                    | 5              | 22.4                  | 134    | 15330 | 5    | Cytochrome b5                                                                                                                                          |
| 2197 | Q9H0N5           | 2                    | 2              | 22.3                  | 103    | 11761 | 7.6  | Pterin-4-alpha-carbinolamine dehydratase 2                                                                                                             |
| 2197 | UPI000013F545    | 2                    | 2              | 17.7                  | 130    | 14365 | 9.1  | pterin-4 alpha-carbinolamine dehydratase 2                                                                                                             |
| 2198 | P61457           | 2                    | 5              | 22.1                  | 104    | 12000 | 6.8  | Pterin-4-alpha-carbinolamine dehydratase                                                                                                               |
| 2198 | Q6FGB3           | 2                    | 5              | 22.1                  | 104    | 12010 | 6.8  | PCBD protein                                                                                                                                           |
| 2199 | Q5RI15           | 2                    | 11             | 22                    | 118    | 13291 | 8.8  | Protein FAM36A                                                                                                                                         |
| 2199 | Q5RI15-2         | 2                    | 11             | 20                    | 130    | 14669 | 8.8  | Isoform 2 of Q5RI15                                                                                                                                    |
| 2200 | P60468           | 2                    | 67             | 21.9                  | 96     | 9974  | 11.6 | Protein transport protein Sec61 subunit beta                                                                                                           |
| 2201 | Q96B45           | 2                    | 5              | 21.9                  | 105    | 11564 | 6.8  | Uncharacterized protein C10orf32                                                                                                                       |
| 2201 | UPI00004563FD    | 2                    | 5              | 21.9                  | 105    | 11608 | 8    | Uncharacterized protein C10orf32.                                                                                                                      |
| 2202 | O15514           | 2                    | 11             | 21.8                  | 142    | 16311 | 4.8  | DNA-directed RNA polymerase II 16 kDa polypeptide                                                                                                      |

| No.  | Accession Number | Unique Peptide Count | Spectrum Count | Sequence Coverage (%) | Length | MolWt | pI   | Descriptive Name                                                                                                                                                                                                                     |
|------|------------------|----------------------|----------------|-----------------------|--------|-------|------|--------------------------------------------------------------------------------------------------------------------------------------------------------------------------------------------------------------------------------------|
| 2203 | Q9Y6G3           | 2                    | 6              | 21.8                  | 142    | 16661 | 8.4  | Mitochondrial 28S ribosomal protein S32, mitochondrial precursor                                                                                                                                                                     |
| 2203 | UPI000016020B    | 2                    | 6              | 21.8                  | 142    | 16602 | 7    | mitochondrial ribosomal protein L42 isoform b                                                                                                                                                                                        |
| 2204 | Q8N4D3           | 2                    | 7              | 23.5                  | 119    | 13921 | 9.8  | Hypothetical protein                                                                                                                                                                                                                 |
| 2204 | UPI000045715C    | 2                    | 7              | 23.3                  | 120    | 14026 | 9.8  | PREDICTED: similar to NADH dehydrogenase (ubiquinone) 1 beta subcomplex, 4, 15kDa isoform 1                                                                                                                                          |
| 2204 | O95168           | 2                    | 7              | 21.7                  | 129    | 15209 | 9.8  | NADH dehydrogenase [ubiquinone] 1 beta subcomplex subunit 4                                                                                                                                                                          |
| 2205 | P33947           | 2                    | 71             | 21.7                  | 212    | 24422 | 8.7  | ER lumen protein retaining receptor 2                                                                                                                                                                                                |
| 2206 | Q9Y5J9           | 2                    | 5              | 21.7                  | 83     | 9344  | 5.1  | Mitochondrial import inner membrane translocase subunit Tim8 B                                                                                                                                                                       |
| 2207 | O95183           | 2                    | 2              | 21.6                  | 116    | 12805 | 7.8  | Vesicle-associated membrane protein 5                                                                                                                                                                                                |
| 2208 | Q9NX14           | 2                    | 3              | 22.2                  | 153    | 17317 | 5.2  | NADH dehydrogenase [ubiquinone] 1 beta subcomplex subunit 11, mitochondrial precursor                                                                                                                                                |
| 2208 | Q7Z4X2           | 2                    | 3              | 21.5                  | 158    | 17942 | 5.4  | Neuronal protein                                                                                                                                                                                                                     |
| 2208 | Q9NX14-2         | 2                    | 3              | 20.9                  | 163    | 18364 | 5.2  | Isoform 2 of Q9NX14                                                                                                                                                                                                                  |
| 2209 | UPI00006C034D    | 2                    | 4              | 21.5                  | 293    | 32072 | 5.4  | PREDICTED: similar to Heterogeneous nuclear ribonucleoprotein C-like 1 (hnRNP core protein C-like 1)                                                                                                                                 |
| 2210 | Q7Z3H5           | 2                    | 4              | 24.8                  | 323    | 37501 | 7.1  | Hypothetical protein DKFZp686O0215                                                                                                                                                                                                   |
| 2210 | UPI0000140DA1    | 2                    | 4              | 23.9                  | 335    | 38275 | 6.2  | Mitogen-activated protein kinase 3 (EC 2.7.11.24) (Extracellular signal-regulated kinase 1) (ERK-1) (Insulin-stimulated MAP2 kinase) (MAP kinase 1) (MAPK 1) (p44-ERK1) (ERT2) (p44-MAPK) (Microtubule-associated protein 2 kinase). |
| 2210 | UPI0000D579B4    | 2                    | 4              | 22.4                  | 357    | 40088 | 7.5  | mitogen-activated protein kinase 3 isoform 2                                                                                                                                                                                         |
| 2210 | P27361           | 2                    | 4              | 21.1                  | 379    | 43136 | 6.8  | Mitogen-activated protein kinase 3                                                                                                                                                                                                   |
| 2211 | Q9BUE6           | 2                    | 5              | 20.9                  | 129    | 14179 | 9.1  | Iron-sulfur cluster assembly 1 homolog, mitochondrial precursor                                                                                                                                                                      |
| 2211 | UPI0000141215    | 2                    | 5              | 20.9                  | 129    | 14177 | 9.1  | OTTHUMP00000021591.                                                                                                                                                                                                                  |
| 2211 | UPI00006C0905    | 2                    | 5              | 20.5                  | 132    | 14630 | 9.9  | similar to HESB like domain containing 2                                                                                                                                                                                             |
| 2211 | UPI0000DD7CF0    | 2                    | 5              | 12.4                  | 218    | 24137 | 10.2 | PREDICTED: similar to HESB like domain containing 2 isoform 2                                                                                                                                                                        |
| 2212 | Q3MHD2           | 2                    | 4              | 20.6                  | 131    | 14328 | 5.9  | LSM12 protein                                                                                                                                                                                                                        |
| 2212 | Q96NL5           | 2                    | 4              | 13.8                  | 195    | 21701 | 7.8  | CDNA FLJ30656 fis, clone DFNES2000292                                                                                                                                                                                                |
| 2213 | P55854           | 2                    | 39             | 20.4                  | 103    | 11637 | 5.5  | Small ubiquitin-related modifier 3 precursor                                                                                                                                                                                         |
| 2214 | Q9NRF9           | 2                    | 4              | 20.4                  | 147    | 16860 | 4.7  | DNA polymerase epsilon subunit 3                                                                                                                                                                                                     |
| 2214 | UPI0000070E87    | 2                    | 4              | 20.4                  | 147    | 16872 | 4.7  | DNA polymerase epsilon subunit 3                                                                                                                                                                                                     |

| No.  | Accession Number | Unique Peptide Count | Spectrum Count | Sequence Coverage (%) | Length | MolWt | pI   | Descriptive Name                                                                                                                                                       |
|------|------------------|----------------------|----------------|-----------------------|--------|-------|------|------------------------------------------------------------------------------------------------------------------------------------------------------------------------|
| 2215 | Q9NZ45           | 2                    | 6              | 20.4                  | 108    | 12199 | 9.1  | Zinc finger CDGSH domain-containing protein 1                                                                                                                          |
| 2216 | UPI0000F0A512    | 2                    | 5              | 20.6                  | 350    | 40110 | 5.7  | Guanine nucleotide-binding protein G(k) subun                                                                                                                          |
| 2216 | P08754           | 2                    | 5              | 20.3                  | 354    | 40532 | 5.7  | Guanine nucleotide-binding protein G(k) subunit alpha (G(i) alpha-3)                                                                                                   |
| 2217 | Q96C01           | 2                    | 8              | 20.3                  | 138    | 15641 | 7.6  | Hypothetical protein FLJ14668                                                                                                                                          |
| 2218 | O14519           | 2                    | 13             | 20                    | 115    | 12365 | 9.4  | Cyclin-dependent kinase 2-associated protein 1                                                                                                                         |
| 2219 | P81605           | 2                    | 3              | 20                    | 110    | 11284 | 6.5  | Dermcidin precursor (Preproteolysin) [Contains: Survival-promoting peptide; DCD-1]                                                                                     |
| 2220 | Q53HB4           | 2                    | 4              | 20                    | 160    | 18995 | 5.3  | M-phase phosphoprotein 6 variant                                                                                                                                       |
| 2220 | UPI00001AE7AB    | 2                    | 4              | 20                    | 160    | 19024 | 5.2  | M-phase phosphoprotein 6                                                                                                                                               |
| 2220 | Q99547           | 2                    | 4              | 20                    | 160    | 18996 | 5.2  | M-phase phosphoprotein 6                                                                                                                                               |
| 2221 | Q9BV81           | 2                    | 3              | 20                    | 110    | 12017 | 10.1 | Transmembrane protein 93                                                                                                                                               |
| 2222 | P11234           | 2                    | 2              | 19.9                  | 206    | 23409 | 6.6  | Ras-related protein Ral-B precursor                                                                                                                                    |
| 2222 | Q6ZS74           | 2                    | 2              | 18.1                  | 227    | 25710 | 8.7  | CDNA FLJ45773 fis, clone NETRP2003448, highly similar to Ras-related protein RAL-B                                                                                     |
| 2223 | P68014           | 2                    | 6              | 19.9                  | 146    | 15808 | 8.4  | Hemoglobin subunit delta                                                                                                                                               |
| 2224 | Q96RP6           | 2                    | 11             | 24.6                  | 118    | 13635 | 8.3  | Ubiquitin-conjugating enzyme                                                                                                                                           |
| 2224 | P61077           | 2                    | 11             | 19.7                  | 147    | 16687 | 7.8  | Ubiquitin-conjugating enzyme E2 D3 (EC 6.3.2.19) (Ubiquitin-protein ligase D3) (Ubiquitin carrier protein D3) (Ubiquitin-conjugating enzyme E2-17 kDa 3) (E2(17)KB 3)  |
| 2224 | P62837           | 2                    | 11             | 19.7                  | 147    | 16735 | 7.8  | Ubiquitin-conjugating enzyme E2 D2 (EC 6.3.2.19) (Ubiquitin-protein ligase D2) (Ubiquitin carrier protein D2) (Ubiquitin-conjugating enzyme E2-17 kDa 2) (E2(17)KB 2)  |
| 2224 | Q8N924           | 2                    | 11             | 19.6                  | 148    | 16785 | 7.3  | CDNA FLJ38503 fis, clone HCHON2000056, highly similar to UBIQUITIN- CONJUGATING ENZYME E2-17 kDa 3                                                                     |
| 2224 | UPI00001B31EA    | 2                    | 11             | 19.5                  | 149    | 16893 | 7.8  | ubiquitin-conjugating enzyme E2D 3 isoform 3                                                                                                                           |
| 2224 | UPI0000D6159F    | 2                    | 11             | 19.3                  | 150    | 16910 | 6.8  | Ubiquitin-conjugating enzyme E2 D3 (EC 6.3.2.19) (Ubiquitin-protein ligase D3) (Ubiquitin carrier protein D3) (Ubiquitin-conjugating enzyme E2-17 kDa 3) (E2(17)KB 3). |
| 2224 | UPI0000D6159E    | 2                    | 11             | 19.3                  | 150    | 16943 | 7.3  | Ubiquitin-conjugating enzyme E2 D3 (EC 6.3.2.19) (Ubiquitin-protein ligase D3) (Ubiquitin carrier protein D3) (Ubiquitin-conjugating enzyme E2-17 kDa 3) (E2(17)KB 3). |
| 2225 | Q6P5R6           | 2                    | 10             | 19.7                  | 122    | 14606 | 9.4  | Ribosomal protein L22-like 1                                                                                                                                           |
| 2226 | P61803           | 2                    | 37             | 19.5                  | 113    | 12497 | 7.1  | Dolichyl-diphosphooligosaccharide-protein glycosyltransferase subunit DAD1                                                                                             |
| 2227 | Q9P2X0           | 2                    | 19             | 23.9                  | 92     | 10094 | 5.9  | Dolichol-phosphate mannosyltransferase subunit 3                                                                                                                       |
| 2227 | Q6P184           | 2                    | 19             | 20.8                  | 106    | 11564 | 6    | DPM3 protein                                                                                                                                                           |

| No.  | Accession Number | Unique Peptide Count | Spectrum Count | Sequence Coverage (%) | Length | MolWt | pI   | Descriptive Name                                                                                                                                                             |
|------|------------------|----------------------|----------------|-----------------------|--------|-------|------|------------------------------------------------------------------------------------------------------------------------------------------------------------------------------|
| 2227 | Q3SX58           | 2                    | 19             | 19.5                  | 113    | 12339 | 6    | DPM3 protein                                                                                                                                                                 |
| 2228 | Q15714           | 2                    | 2              | 19.4                  | 144    | 15680 | 5.2  | TSC22 domain family protein 1                                                                                                                                                |
| 2229 | O14548           | 2                    | 6              | 19.3                  | 114    | 12615 | 9.4  | Cytochrome c oxidase subunit VIIa-related protein, mitochondrial precursor                                                                                                   |
| 2230 | O14966           | 2                    | 2              | 19.2                  | 203    | 23155 | 7.2  | Ras-related protein Rab-7L1                                                                                                                                                  |
| 2230 | Q53EX5           | 2                    | 2              | 19.2                  | 203    | 23139 | 7.2  | RAB7, member RAS oncogene family-like 1 variant                                                                                                                              |
| 2231 | O95295           | 2                    | 5              | 19.1                  | 136    | 14874 | 9.3  | SNARE-associated protein Snapin                                                                                                                                              |
| 2232 | P18077           | 2                    | 23             | 19.1                  | 110    | 12538 | 11.1 | 60S ribosomal protein L35a                                                                                                                                                   |
| 2233 | Q9NX24           | 2                    | 8              | 19                    | 153    | 17201 | 8.2  | H/ACA ribonucleoprotein complex subunit 2                                                                                                                                    |
| 2234 | UPI0000D610B1    | 2                    | 2              | 19                    | 189    | 20461 | 5.8  | Breast carcinoma amplified sequence 4.                                                                                                                                       |
| 2235 | UPI00001AE467    | 2                    | 13             | 20.6                  | 102    | 11138 | 7.3  | blocked early in transport 1 homolog ( <i>S. cerevisiae</i> ) like                                                                                                           |
| 2235 | Q9NYM9           | 2                    | 13             | 18.9                  | 111    | 12388 | 8.2  | BET1-like protein                                                                                                                                                            |
| 2236 | Q9P0S2           | 2                    | 3              | 18.9                  | 106    | 12293 | 9.5  | COX16-like protein C14orf112, mitochondrial precursor                                                                                                                        |
| 2237 | O15173           | 2                    | 8              | 18.8                  | 223    | 23818 | 4.9  | Membrane-associated progesterone receptor component 2                                                                                                                        |
| 2238 | UPI0000DD7B6E    | 2                    | 40             | 33.3                  | 72     | 8132  | 11.1 | PREDICTED: similar to 60S ribosomal protein L22 (Heparin-binding protein HBp15)                                                                                              |
| 2238 | P35268           | 2                    | 40             | 18.8                  | 128    | 14787 | 9.2  | 60S ribosomal protein L22                                                                                                                                                    |
| 2238 | Q7Z4W8           | 2                    | 40             | 18.8                  | 128    | 14818 | 9.3  | Heparin-binding protein HBp15                                                                                                                                                |
| 2239 | P62861           | 2                    | 13             | 18.6                  | 59     | 6648  | 12.1 | 40S ribosomal protein S30                                                                                                                                                    |
| 2240 | Q93096           | 2                    | 4              | 18.5                  | 173    | 19815 | 9    | Protein tyrosine phosphatase type IVA protein 1 (EC 3.1.3.48) (Protein-tyrosine phosphatase 4a1) (Protein-tyrosine phosphatase of regenerating liver 1) (PRL-1) (PTP(CAAXI)) |
| 2241 | Q9NQ29-2         | 2                    | 2              | 20.9                  | 325    | 38405 | 10   | Isoform 2 of Q9NQ29                                                                                                                                                          |
| 2241 | Q9NQ29-3         | 2                    | 2              | 19.2                  | 354    | 41929 | 9.9  | Isoform 3 of Q9NQ29                                                                                                                                                          |
| 2241 | Q9NQ29           | 2                    | 2              | 18.3                  | 371    | 43728 | 9.9  | Putative RNA-binding protein Luc7-like 1                                                                                                                                     |
| 2242 | Q96A26           | 2                    | 14             | 18.2                  | 154    | 17342 | 9.8  | E2-induced gene 5 protein                                                                                                                                                    |
| 2243 | Q9Y3E0           | 2                    | 60             | 18.1                  | 138    | 15426 | 10.3 | Vesicle transport protein GOT1B                                                                                                                                              |
| 2244 | O14880           | 2                    | 32             | 17.8                  | 152    | 16516 | 9.4  | Microsomal glutathione S-transferase 3                                                                                                                                       |
| 2244 | Q53GB9           | 2                    | 32             | 17.8                  | 152    | 16530 | 9.4  | Microsomal glutathione S-transferase 3 variant                                                                                                                               |
| 2245 | P45973           | 2                    | 7              | 17.8                  | 191    | 22225 | 5.9  | Chromobox protein homolog 5                                                                                                                                                  |
| 2246 | Q75M90           | 2                    | 2              | 17.7                  | 113    | 12749 | 10.1 | Hypothetical protein HSPC268                                                                                                                                                 |
| 2246 | Q96HJ9           | 2                    | 2              | 17.7                  | 113    | 12733 | 10.1 | Hypothetical protein HSPC268                                                                                                                                                 |
| 2247 | P05161           | 2                    | 2              | 17.6                  | 165    | 17887 | 7.5  | Interferon-induced 17 kDa protein precursor [Contains: Ubiquitin cross-reactive protein (hUCRP) (Interferon-induced 15 kDa protein)]                                         |
| 2248 | P39210           | 2                    | 4              | 17.6                  | 176    | 19733 | 9.5  | Protein Mpv17                                                                                                                                                                |
| 2249 | P78537           | 2                    | 2              | 17.6                  | 125    | 14311 | 8.2  | Biogenesis of lysosome-related organelles complex-1 subunit 1                                                                                                                |
| 2250 | Q5TDQ4           | 2                    | 5              | 17.6                  | 170    | 19550 | 5.6  | HD domain containing 2                                                                                                                                                       |
| 2250 | Q9Y3D1           | 2                    | 5              | 17.6                  | 170    | 19491 | 5.4  | CGI-130 protein                                                                                                                                                              |
| 2250 | Q6NZ49           | 2                    | 5              | 14.7                  | 204    | 23419 | 5.7  | HD domain containing 2                                                                                                                                                       |
| 2250 | Q9BTT2           | 2                    | 5              | 13.8                  | 218    | 24850 | 6.2  | HD domain-containing protein 2                                                                                                                                               |

| No.  | Accession Number | Unique Peptide Count | Spectrum Count | Sequence Coverage (%) | Length | MolWt  | pI   | Descriptive Name                                                                                                                                                             |
|------|------------------|----------------------|----------------|-----------------------|--------|--------|------|------------------------------------------------------------------------------------------------------------------------------------------------------------------------------|
| 2251 | Q4R6Q8           | 2                    | 6              | 17.5                  | 171    | 18756  | 9    | Testis cDNA, clone: QtsA-17369, similar to human 1-acylglycerol-3-phosphate O-acyltransferase 1(lysophosphatidic acid acyltransferase, alpha) (AGPAT1),transcript variant 2, |
| 2251 | Q71VH6           | 2                    | 6              | 12.3                  | 244    | 27083  | 9.4  | Hypothetical protein                                                                                                                                                         |
| 2251 | Q99943           | 2                    | 6              | 10.6                  | 283    | 31717  | 9.4  | 1-acyl-sn-glycerol-3-phosphate acyltransferase alpha                                                                                                                         |
| 2252 | Q9BX83           | 2                    | 3              | 24                    | 100    | 10710  | 7.7  | Hemoglobin alpha 1 globin chain                                                                                                                                              |
| 2252 | Q4ZGM8           | 2                    | 3              | 24                    | 100    | 10796  | 9    | Hemoglobin alpha-2 globin mutant                                                                                                                                             |
| 2252 | P69905           | 2                    | 3              | 16.9                  | 142    | 15258  | 8.7  | Hemoglobin subunit alpha                                                                                                                                                     |
| 2252 | Q53F97           | 2                    | 3              | 16.9                  | 142    | 15281  | 8.7  | Alpha 2 globin variant                                                                                                                                                       |
| 2252 | Q1HDT5           | 2                    | 3              | 16.9                  | 142    | 15272  | 9    | Hemoglobin alpha 1-2 hybrid                                                                                                                                                  |
| 2253 | P83876           | 2                    | 3              | 16.9                  | 142    | 16786  | 5.8  | Thioredoxin-like protein 4A                                                                                                                                                  |
| 2254 | P84101           | 2                    | 5              | 16.9                  | 59     | 6900   | 10.4 | Small EDRK-rich factor 2                                                                                                                                                     |
| 2255 | Q8NCS4           | 2                    | 2              | 16.9                  | 154    | 16885  | 9.2  | ZMYM6 protein                                                                                                                                                                |
| 2256 | Q53EN2           | 2                    | 4              | 16.8                  | 190    | 21307  | 6.2  | MURR1 variant                                                                                                                                                                |
| 2256 | Q8N668           | 2                    | 4              | 16.8                  | 190    | 21178  | 6.2  | COMM domain-containing protein 1                                                                                                                                             |
| 2257 | UPI000016176F    | 2                    | 3              | 18.6                  | 264    | 30084  | 9.1  | cyclin-dependent kinase 2 isoform 2                                                                                                                                          |
| 2257 | P24941           | 2                    | 3              | 16.4                  | 298    | 33930  | 8.7  | Cell division protein kinase 2                                                                                                                                               |
| 2258 | O60282           | 2                    | 4              | 16.1                  | 957    | 109495 | 6.2  | Kinesin heavy chain isoform 5C                                                                                                                                               |
| 2259 | O75915           | 2                    | 50             | 16                    | 188    | 21615  | 9.8  | PRA1 family protein 3                                                                                                                                                        |
| 2260 | Q9NPJ3           | 2                    | 13             | 15.7                  | 140    | 14960  | 9.1  | Thioesterase superfamily member 2                                                                                                                                            |
| 2261 | Q9BY50           | 2                    | 12             | 15.6                  | 192    | 21542  | 9.2  | Signal peptidase complex catalytic subunit SEC11C                                                                                                                            |
| 2262 | Q9Y237           | 2                    | 3              | 16.8                  | 131    | 13810  | 9.8  | Peptidyl-prolyl cis-trans isomerase NIMA-interacting 4                                                                                                                       |
| 2262 | Q3MHV0           | 2                    | 3              | 15.6                  | 141    | 14892  | 9.9  | PIN4 protein                                                                                                                                                                 |
| 2262 | Q0D2H3           | 2                    | 3              | 15.5                  | 142    | 15069  | 9.8  | PIN4 protein                                                                                                                                                                 |
| 2262 | UPI00002263A9    | 2                    | 3              | 14.1                  | 156    | 16608  | 10   | protein (peptidyl-prolyl cis/trans isomerase) NIMA-interacting, 4 (parvulin)                                                                                                 |
| 2263 | Q9BRT6           | 2                    | 8              | 15.5                  | 129    | 15225  | 10.4 | Uncharacterized protein C12orf31                                                                                                                                             |
| 2264 | UPI0000D616EE    | 2                    | 6              | 15.7                  | 102    | 11528  | 5.3  | U6 snRNA-associated Sm-like protein LSm7.                                                                                                                                    |
| 2264 | Q9UK45           | 2                    | 6              | 15.5                  | 103    | 11602  | 5.3  | U6 snRNA-associated Sm-like protein LSm7                                                                                                                                     |
| 2265 | P42766           | 2                    | 20             | 15.4                  | 123    | 14551  | 11   | 60S ribosomal protein L35                                                                                                                                                    |
| 2266 | P63098           | 2                    | 13             | 15.3                  | 170    | 19300  | 4.8  | Calcineurin subunit B isoform 1                                                                                                                                              |
| 2266 | P63100-2         | 2                    | 13             | 12                    | 216    | 24979  | 5.2  | Isoform 2 of P63100                                                                                                                                                          |
| 2266 | Q86YQ0           | 2                    | 13             | 3.4                   | 765    | 84721  | 8.1  | HZGJ                                                                                                                                                                         |
| 2267 | Q9NZZ4           | 2                    | 5              | 19.4                  | 139    | 16059  | 6.8  | HSPC176                                                                                                                                                                      |
| 2267 | Q9UL33           | 2                    | 5              | 19.3                  | 140    | 16146  | 6.8  | Trafficking protein particle complex 2-like protein                                                                                                                          |
| 2267 | Q6ZTA7           | 2                    | 5              | 15.3                  | 177    | 20021  | 8.2  | CDNA FLJ44827 fis, clone BRACE3046837                                                                                                                                        |
| 2268 | Q9NQT4           | 2                    | 4              | 15.3                  | 235    | 25249  | 7.6  | Exosome complex exonuclease RRP46                                                                                                                                            |
| 2269 | Q05BV9           | 2                    | 5              | 15.2                  | 138    | 15774  | 5.2  | Hypothetical protein                                                                                                                                                         |
| 2269 | Q05DM1           | 2                    | 5              | 15.1                  | 139    | 15901  | 5.5  | Hypothetical protein                                                                                                                                                         |
| 2269 | UPI0000456571    | 2                    | 5              | 9.2                   | 228    | 26510  | 5.7  | Adrenal gland protein AD-002 (Hypothetical protein HSPC148) (Hypothetical protein ORF5).                                                                                     |

| No.  | Accession Number | Unique Peptide Count | Spectrum Count | Sequence Coverage (%) | Length | MolWt | pI   | Descriptive Name                                                                           |
|------|------------------|----------------------|----------------|-----------------------|--------|-------|------|--------------------------------------------------------------------------------------------|
| 2269 | Q9UI29           | 2                    | 5              | 9.2                   | 229    | 26624 | 5.7  | Adrenal gland protein AD-002                                                               |
| 2269 | Q9P013           | 2                    | 5              | 9.2                   | 229    | 26610 | 5.7  | HSPC148                                                                                    |
| 2270 | Q8N5N7           | 2                    | 2              | 15.2                  | 158    | 18325 | 7.9  | Mitochondrial 39S ribosomal protein L50                                                    |
| 2271 | Q8TDP1-2         | 2                    | 7              | 15.3                  | 163    | 17712 | 4.9  | Isoform 2 of Q8TDP1                                                                        |
| 2271 | Q8TDP1           | 2                    | 7              | 15.2                  | 164    | 17840 | 5    | Ribonuclease H2 subunit C                                                                  |
| 2272 | Q96AB3           | 2                    | 3              | 15.1                  | 205    | 22337 | 7.8  | Isochorismatase domain-containing protein 2, mitochondrial precursor                       |
| 2272 | Q96AB3-2         | 2                    | 3              | 14                    | 221    | 24097 | 7.8  | Isoform 2 of Q96AB3                                                                        |
| 2273 | P51151           | 2                    | 2              | 14.9                  | 201    | 22838 | 5.5  | Ras-related protein Rab-9                                                                  |
| 2274 | Q6PII1           | 2                    | 2              | 14.9                  | 174    | 19423 | 5.9  | GPR180 protein                                                                             |
| 2274 | Q86V85           | 2                    | 2              | 5.9                   | 440    | 49395 | 7.4  | Integral membrane protein GPR180 precursor                                                 |
| 2275 | Q5T091           | 2                    | 25             | 15.5                  | 187    | 21024 | 8.7  | RER1 retention in endoplasmic reticulum 1 homolog                                          |
| 2275 | O15258           | 2                    | 25             | 14.8                  | 196    | 22958 | 9.5  | Protein RER1                                                                               |
| 2275 | UPI000049DC68    | 2                    | 25             | 14.1                  | 205    | 23050 | 6.9  | Protein RER1.                                                                              |
| 2275 | UPI0000D61E27    | 2                    | 25             | 13.6                  | 213    | 24689 | 9.6  | Protein RER1.                                                                              |
| 2275 | Q9P0H9           | 2                    | 25             | 13.6                  | 214    | 24817 | 9.6  | RER1 protein                                                                               |
| 2276 | P52657           | 2                    | 14             | 14.7                  | 109    | 12457 | 6.8  | Transcription initiation factor IIA gamma chain                                            |
| 2277 | P17568           | 2                    | 9              | 14.6                  | 137    | 16402 | 8.9  | NADH dehydrogenase [ubiquinone] 1 beta subcomplex subunit 7                                |
| 2278 | UPI000015FD55    | 2                    | 23             | 14.8                  | 155    | 17219 | 11.1 | PREDICTED: similar to 60S ribosomal protein L29 (Cell surface heparin-binding protein HIP) |
| 2278 | P47914           | 2                    | 23             | 14.5                  | 159    | 17752 | 11.7 | 60S ribosomal protein L29                                                                  |
| 2278 | Q6IPI1           | 2                    | 23             | 14.3                  | 161    | 17951 | 11.7 | Ribosomal protein L29                                                                      |
| 2279 | P82663           | 2                    | 7              | 14.5                  | 173    | 20116 | 8.8  | Mitochondrial 28S ribosomal protein S25                                                    |
| 2280 | Q16495           | 2                    | 2              | 14.5                  | 145    | 15156 | 11.3 | Thyroid peroxidase                                                                         |
| 2281 | Q5TBA5           | 2                    | 9              | 14.5                  | 275    | 30009 | 5.3  | OTTHUMP00000018264                                                                         |
| 2281 | Q96B26           | 2                    | 9              | 14.5                  | 276    | 30040 | 5.3  | Exosome complex exonuclease RRP43                                                          |
| 2282 | Q9BV57           | 2                    | 4              | 14.5                  | 179    | 21498 | 5.7  | 1,2-dihydroxy-3-keto-5-methylthiopentene dioxygenase                                       |
| 2282 | UPI0000070FDE    | 2                    | 4              | 14.5                  | 179    | 21483 | 5.7  | membrane-type 1 matrix metalloproteinase cytoplasmic tail binding protein-1                |
| 2283 | Q9BW83           | 2                    | 8              | 14.5                  | 186    | 20480 | 5.4  | Putative GTP-binding protein RAY-like                                                      |
| 2283 | UPI000013C6D3    | 2                    | 8              | 14.4                  | 187    | 20424 | 5.6  | Putative GTP-binding protein RAY-like (Rab-like protein 4).                                |
| 2284 | Q5HYD9           | 2                    | 13             | 19.6                  | 107    | 11873 | 4.8  | Hypothetical protein DKFzP686M0619                                                         |
| 2284 | O43169           | 2                    | 13             | 14.4                  | 146    | 16332 | 5    | Cytochrome b5 type B precursor                                                             |
| 2285 | P49006           | 2                    | 7              | 14.4                  | 195    | 19529 | 4.7  | MARCKS-related protein                                                                     |
| 2286 | Q8WY22           | 2                    | 2              | 14.3                  | 251    | 27836 | 9.4  | BR13-binding protein                                                                       |
| 2287 | Q9HBL7           | 2                    | 7              | 14.3                  | 147    | 17201 | 9.6  | Uncharacterized protein C9orf46                                                            |
| 2287 | UPI0000073DFC    | 2                    | 7              | 14.3                  | 147    | 17229 | 9.7  | hypothetical protein LOC55848                                                              |
| 2288 | Q9Y3C4           | 2                    | 11             | 14.3                  | 175    | 19661 | 6.8  | TP53RK-binding protein                                                                     |
| 2288 | Q9Y3C4-3         | 2                    | 11             | 11.7                  | 214    | 23854 | 7.4  | Isoform 3 of Q9Y3C4                                                                        |
| 2289 | A2BEH4           | 2                    | 16             | 15.8                  | 196    | 20942 | 4.9  | Proteasome (Prosome, macropain) subunit beta type 9                                        |
| 2289 | P28065-2         | 2                    | 16             | 14.8                  | 209    | 22328 | 5    | Isoform LMP2.S of P28065                                                                   |
| 2289 | A2BEH1           | 2                    | 16             | 14.2                  | 219    | 23245 | 5    | Proteasome (Prosome, macropain) subunit beta type 9                                        |

| No.  | Accession Number | Unique Peptide Count | Spectrum Count | Sequence Coverage (%) | Length | MolWt | pI  | Descriptive Name                                                                                                                                                                                    |
|------|------------------|----------------------|----------------|-----------------------|--------|-------|-----|-----------------------------------------------------------------------------------------------------------------------------------------------------------------------------------------------------|
| 2289 | P28065           | 2                    | 16             | 14.2                  | 219    | 23264 | 5   | Proteasome subunit beta type 9 precursor                                                                                                                                                            |
| 2290 | O43752           | 2                    | 5              | 14.1                  | 255    | 29176 | 4.9 | Syntaxin-6                                                                                                                                                                                          |
| 2291 | O43716           | 2                    | 2              | 14                    | 136    | 15086 | 5   | Putative protein 15E1.2                                                                                                                                                                             |
| 2292 | P00374           | 2                    | 10             | 13.9                  | 187    | 21453 | 7.4 | Dihydrofolate reductase                                                                                                                                                                             |
| 2293 | P63279           | 2                    | 23             | 13.9                  | 158    | 18007 | 8.7 | SUMO-conjugating enzyme UBC9                                                                                                                                                                        |
| 2293 | UPI00001AF46D    | 2                    | 23             | 12                    | 184    | 20458 | 8.5 | SUMO-conjugating enzyme UBC9 (EC 6.3.2.-) (SUMO-protein ligase) (Ubiquitin-conjugating enzyme E2 I) (Ubiquitin-protein ligase I) (Ubiquitin carrier protein I) (Ubiquitin carrier protein 9) (p18). |
| 2293 | Q7KZS0           | 2                    | 23             | 12                    | 184    | 20444 | 8.5 | Ubiquitin-conjugating enzyme E2I                                                                                                                                                                    |
| 2294 | Q496C9           | 2                    | 4              | 13.9                  | 209    | 23484 | 8.3 | D-tyrosyl-tRNA deacylase 1 homolog                                                                                                                                                                  |
| 2294 | Q8TEA8           | 2                    | 4              | 13.9                  | 209    | 23424 | 8.2 | Probable D-tyrosyl-tRNA(Tyr) deacylase 1                                                                                                                                                            |
| 2295 | UPI0000D624C1    | 2                    | 4              | 14.2                  | 134    | 15535 | 8.1 | Golgin subfamily A member 7 (Golgi complex-associated protein of 16 kDa).                                                                                                                           |
| 2295 | Q7Z5G4-2         | 2                    | 4              | 14.2                  | 134    | 15578 | 8.4 | Isoform 2 of Q7Z5G4                                                                                                                                                                                 |
| 2295 | Q7Z5G4           | 2                    | 4              | 13.9                  | 137    | 15824 | 7   | Golgin subfamily A member 7                                                                                                                                                                         |
| 2296 | Q9H0U6           | 2                    | 8              | 13.9                  | 180    | 20577 | 9.5 | 39S ribosomal protein L18, mitochondrial precursor                                                                                                                                                  |
| 2297 | Q9Y2R5           | 2                    | 2              | 13.8                  | 130    | 14502 | 9.8 | 28S ribosomal protein S17, mitochondrial precursor                                                                                                                                                  |
| 2298 | Q5JYY5           | 2                    | 2              | 16.8                  | 185    | 20217 | 5.6 | Proteasome (Prosome, macropain) 26S subunit, non-ATPase, 10                                                                                                                                         |
| 2298 | Q5JYY4           | 2                    | 2              | 16.1                  | 193    | 20808 | 6.6 | Proteasome (Prosome, macropain) 26S subunit, non-ATPase, 10                                                                                                                                         |
| 2298 | O75832           | 2                    | 2              | 13.7                  | 226    | 24428 | 6.1 | 26S proteasome non-ATPase regulatory subunit 10                                                                                                                                                     |
| 2299 | Q13084           | 2                    | 5              | 13.7                  | 256    | 30157 | 8.3 | 39S ribosomal protein L28, mitochondrial precursor                                                                                                                                                  |
| 2299 | Q4TT38           | 2                    | 5              | 13.7                  | 256    | 30046 | 8   | Mitochondrial ribosomal protein L28                                                                                                                                                                 |
| 2300 | Q7LG56           | 2                    | 7              | 13.7                  | 351    | 40737 | 5   | Ribonucleoside-diphosphate reductase M2 subunit B                                                                                                                                                   |
| 2301 | Q0VAE4           | 2                    | 3              | 13.6                  | 235    | 26879 | 9.2 | MORF4L1 protein                                                                                                                                                                                     |
| 2301 | Q9Y690           | 2                    | 3              | 13.6                  | 235    | 26733 | 8.4 | Transcription factor-like protein MORF4                                                                                                                                                             |
| 2301 | Q569V4           | 2                    | 3              | 9.9                   | 323    | 37231 | 9.2 | Mortality factor 4 like 1                                                                                                                                                                           |
| 2301 | Q9UBU8           | 2                    | 3              | 8.8                   | 362    | 41474 | 9.3 | Mortality factor 4-like protein 1                                                                                                                                                                   |
| 2302 | Q16576           | 2                    | 6              | 13.6                  | 425    | 47820 | 5   | Histone-binding protein RBBP7                                                                                                                                                                       |
| 2303 | Q5QP91           | 2                    | 2              | 13.6                  | 221    | 24843 | 8.1 | Eukaryotic translation initiation factor 2B, subunit 3 gamma, 58kDa                                                                                                                                 |
| 2304 | Q7RTV0           | 2                    | 11             | 13.6                  | 110    | 12405 | 8.4 | PHD finger-like domain-containing protein 5A                                                                                                                                                        |
| 2305 | Q6IQ22           | 2                    | 3              | 13.5                  | 244    | 27248 | 8.4 | Ras-related protein Rab-12                                                                                                                                                                          |
| 2306 | Q9NRP0           | 2                    | 34             | 13.4                  | 149    | 16829 | 9.1 | DC2                                                                                                                                                                                                 |
| 2306 | Q9P1R4           | 2                    | 34             | 12.5                  | 160    | 17895 | 9.5 | HDCMD45P                                                                                                                                                                                            |
| 2306 | Q9P075           | 2                    | 34             | 12                    | 167    | 18667 | 9.5 | HSPC307                                                                                                                                                                                             |
| 2307 | Q9H2D1           | 2                    | 5              | 13.3                  | 315    | 35407 | 9.5 | Mitochondrial folate transporter/carrier                                                                                                                                                            |
| 2308 | Q9NWM8           | 2                    | 2              | 13.3                  | 211    | 24172 | 6.1 | FK506-binding protein 14 precursor                                                                                                                                                                  |



| No.  | Accession Number | Unique Peptide Count | Spectrum Count | Sequence Coverage (%) | Length | MolWt | pI   | Descriptive Name                                                                                              |
|------|------------------|----------------------|----------------|-----------------------|--------|-------|------|---------------------------------------------------------------------------------------------------------------|
| 2309 | P09234           | 2                    | 23             | 13.2                  | 159    | 17394 | 9.7  | U1 small nuclear ribonucleoprotein C                                                                          |
| 2309 | Q53G33           | 2                    | 23             | 13.2                  | 159    | 17452 | 9.6  | Small nuclear ribonucleoprotein polypeptide C variant                                                         |
| 2309 | Q5TAL3           | 2                    | 23             | 11.7                  | 180    | 19687 | 9.6  | Small nuclear ribonucleoprotein polypeptide C                                                                 |
| 2310 | UPI000013EC4C    | 2                    | 17             | 13.3                  | 181    | 20792 | 9.6  | jagunal homolog 1                                                                                             |
| 2310 | Q8N5M9           | 2                    | 17             | 13.1                  | 183    | 21125 | 9.7  | Protein jagunal homolog 1                                                                                     |
| 2310 | Q96SW1           | 2                    | 17             | 13.1                  | 183    | 21072 | 9.6  | CDNA FLJ14602 fis, clone NT2RP1000191                                                                         |
| 2311 | O15347           | 2                    | 9              | 13                    | 200    | 22980 | 8.4  | High mobility group protein B3                                                                                |
| 2311 | UPI0000DD7F4E    | 2                    | 9              | 12.5                  | 208    | 23744 | 8.8  | PREDICTED: similar to high-mobility group box 3                                                               |
| 2312 | Q00169           | 2                    | 3              | 13                    | 270    | 31806 | 6.5  | Phosphatidylinositol transfer protein alpha isoform                                                           |
| 2312 | UPI00004569F0    | 2                    | 3              | 12.9                  | 271    | 31934 | 6.7  | Phosphatidylinositol transfer protein alpha isoform (PtdIns transfer protein alpha) (PtdInsTP) (PI-TP-alpha). |
| 2312 | Q6NUL6           | 2                    | 3              | 11.1                  | 316    | 35900 | 8    | PITPNA protein                                                                                                |
| 2313 | Q5T6Z8           | 2                    | 5              | 13                    | 192    | 21860 | 5.3  | Transmembrane protein 59                                                                                      |
| 2313 | Q6P5R1           | 2                    | 5              | 10.5                  | 239    | 27100 | 5    | TMEM59 protein                                                                                                |
| 2313 | Q9BXS4           | 2                    | 5              | 7.7                   | 323    | 36223 | 5.1  | Transmembrane protein 59 precursor                                                                            |
| 2314 | Q9Y2V2           | 2                    | 6              | 12.9                  | 147    | 15892 | 8.2  | Calcium-regulated heat stable protein 1                                                                       |
| 2315 | Q04323           | 2                    | 2              | 12.8                  | 297    | 33325 | 5.3  | SAPK substrate protein 1                                                                                      |
| 2316 | Q6MZY9           | 2                    | 5              | 12.8                  | 172    | 19092 | 6.5  | Hypothetical protein DKFZp686M14237                                                                           |
| 2316 | UPI0000229DA7    | 2                    | 5              | 12.8                  | 172    | 19036 | 6.5  | CDNA FLJ11151 fis, clone PLACE1006883.                                                                        |
| 2316 | UPI000013D1D1    | 2                    | 5              | 7                     | 314    | 35548 | 6.2  | CDNA FLJ11151 fis, clone PLACE1006883.                                                                        |
| 2316 | Q9H9M9           | 2                    | 5              | 7                     | 314    | 35624 | 6.3  | CDNA FLJ12648 fis, clone NT2RM4002018                                                                         |
| 2316 | Q9BRF8           | 2                    | 5              | 7                     | 314    | 35620 | 6.1  | Hypothetical protein FLJ11151                                                                                 |
| 2317 | A2TDT2           | 2                    | 3              | 12.7                  | 157    | 18221 | 6.5  | Mutant B-cell CLL/lymphoma 10                                                                                 |
| 2317 | O95999           | 2                    | 3              | 8.6                   | 233    | 26252 | 5.8  | B-cell lymphoma/leukemia 10                                                                                   |
| 2318 | Q561V6           | 2                    | 14             | 17.5                  | 137    | 15667 | 7.6  | NDUFB5 protein                                                                                                |
| 2318 | O43674           | 2                    | 14             | 12.7                  | 189    | 21750 | 9.6  | NADH dehydrogenase [ubiquinone] 1 beta subcomplex subunit 5, mitochondrial precursor                          |
| 2319 | Q96IP9           | 2                    | 2              | 12.7                  | 213    | 22079 | 5.8  | CDV3 protein                                                                                                  |
| 2319 | Q9UKY7           | 2                    | 2              | 10.5                  | 258    | 27335 | 6.4  | Protein CDV3 homolog                                                                                          |
| 2320 | Q00534           | 2                    | 2              | 12.6                  | 326    | 36938 | 6.5  | Cell division protein kinase 6                                                                                |
| 2321 | Q9NRG7-2         | 2                    | 5              | 12.6                  | 293    | 31077 | 9    | Isoform 2 of Q9NRG7                                                                                           |
| 2321 | UPI000059D223    | 2                    | 5              | 12.6                  | 293    | 31077 | 9    | hypothetical protein LOC56948                                                                                 |
| 2322 | Q96HR9           | 2                    | 20             | 12.5                  | 184    | 20733 | 8.6  | Receptor expression-enhancing protein 6                                                                       |
| 2323 | Q9P0S3           | 2                    | 5              | 12.4                  | 153    | 17371 | 9.6  | ORM1-like protein 1                                                                                           |
| 2324 | UPI000006FB06    | 2                    | 6              | 13.4                  | 292    | 33242 | 4.6  | BRCA2 and CDKN1A-interacting protein isoform C                                                                |
| 2324 | Q9P287-3         | 2                    | 6              | 13.4                  | 292    | 33442 | 4.6  | Isoform 3 of Q9P287                                                                                           |
| 2324 | Q9P287           | 2                    | 6              | 12.4                  | 314    | 35979 | 4.6  | BRCA2 and CDKN1A-interacting protein                                                                          |
| 2324 | Q9P287-2         | 2                    | 6              | 12.1                  | 322    | 36215 | 4.7  | Isoform 2 of Q9P287                                                                                           |
| 2325 | O14949           | 2                    | 24             | 12.2                  | 82     | 9906  | 10.1 | Ubiquinol-cytochrome c reductase complex ubiquinone-binding protein QP-C                                      |

| No.  | Accession Number | Unique Peptide Count | Spectrum Count | Sequence Coverage (%) | Length | MolWt | pI   | Descriptive Name                                                                                    |
|------|------------------|----------------------|----------------|-----------------------|--------|-------|------|-----------------------------------------------------------------------------------------------------|
| 2326 | P62487           | 2                    | 2              | 12.2                  | 172    | 19294 | 5.5  | DNA-directed RNA polymerase II 19 kDa polypeptide                                                   |
| 2327 | Q16539           | 2                    | 4              | 12.2                  | 360    | 41293 | 5.8  | Mitogen-activated protein kinase 14                                                                 |
| 2327 | Q95NE7           | 2                    | 4              | 12.2                  | 360    | 41493 | 5.9  | Mitogen-activated protein kinase 14                                                                 |
| 2327 | UPI0000E8DA32    | 2                    | 4              | 12                    | 367    | 42109 | 6.4  | Mitogen-activated protein kinase 14                                                                 |
| 2327 | UPI0000E8DA31    | 2                    | 4              | 12                    | 367    | 42143 | 6.4  | Mitogen-activated protein kinase 14                                                                 |
| 2327 | UPI0000E8DA30    | 2                    | 4              | 12                    | 367    | 42083 | 6.4  | Mitogen-activated protein kinase 14                                                                 |
| 2328 | Q9H2W6           | 2                    | 4              | 12.2                  | 279    | 31705 | 7    | 39S ribosomal protein L46, mitochondrial precursor                                                  |
| 2329 | P11441           | 2                    | 5              | 12.1                  | 157    | 17776 | 8.7  | Ubiquitin-like protein 4A                                                                           |
| 2329 | Q5HY81           | 2                    | 5              | 10.6                  | 180    | 20570 | 9.7  | Ubiquitin-like 4                                                                                    |
| 2330 | Q5T0S6           | 2                    | 10             | 13.3                  | 279    | 30743 | 7.9  | Palmitoyl-protein thioesterase 1                                                                    |
| 2330 | P50897           | 2                    | 10             | 12.1                  | 306    | 34193 | 6.5  | Palmitoyl-protein thioesterase 1 precursor                                                          |
| 2331 | Q567U8           | 2                    | 12             | 12.1                  | 248    | 27317 | 5.5  | COPS7A protein                                                                                      |
| 2331 | Q9UBW8           | 2                    | 12             | 10.9                  | 275    | 30277 | 8.2  | COP9 signalosome complex subunit 7a                                                                 |
| 2332 | Q5T653           | 2                    | 6              | 12.1                  | 305    | 33301 | 11.3 | 39S ribosomal protein L2, mitochondrial precursor                                                   |
| 2333 | Q96LJ7           | 2                    | 6              | 12.1                  | 313    | 33909 | 7.8  | Dehydrogenase/reductase SDR family member 1                                                         |
| 2334 | Q9P000           | 2                    | 3              | 12.1                  | 198    | 21819 | 5.9  | COMM domain-containing protein 9                                                                    |
| 2334 | UPI00000731DD    | 2                    | 3              | 12.1                  | 198    | 21918 | 6.2  | COMM domain containing 9                                                                            |
| 2335 | P02511           | 2                    | 2              | 12                    | 175    | 20159 | 7.3  | Alpha crystallin B chain (Alpha(B)-crystallin)                                                      |
| 2336 | P40855           | 2                    | 5              | 12                    | 299    | 32807 | 4.3  | Peroxisomal biogenesis factor 19                                                                    |
| 2337 | Q5VXM9           | 2                    | 4              | 12                    | 208    | 24158 | 9.5  | Brix domain containing 1                                                                            |
| 2337 | Q9H7B2           | 2                    | 4              | 8.2                   | 306    | 35583 | 10   | Brix domain-containing protein 1                                                                    |
| 2338 | UPI00001400A6    | 2                    | 4              | 12.2                  | 164    | 18593 | 8.9  | 28S ribosomal protein S24, mitochondrial precursor (S24mt) (MRP-S24) (bMRP47) (bMRP-47).            |
| 2338 | Q96EL2           | 2                    | 4              | 12                    | 167    | 19015 | 9.4  | 28S ribosomal protein S24, mitochondrial precursor                                                  |
| 2339 | Q6ZRV1           | 2                    | 14             | 11.9                  | 243    | 26419 | 8    | CDNA FLJ46073 fis, clone TESTI2001364, highly similar to Homo sapiens lactate dehydrogenase A -like |
| 2340 | Q9Y3B8           | 2                    | 11             | 11.8                  | 237    | 26833 | 6.9  | Oligoribonuclease, mitochondrial precursor                                                          |
| 2340 | UPI0000130E83    | 2                    | 11             | 11.8                  | 237    | 26861 | 6.9  | small fragment nuclease                                                                             |
| 2341 | Q96EY5-2         | 2                    | 2              | 13.7                  | 233    | 24532 | 8.3  | Isoform 2 of Q96EY5                                                                                 |
| 2341 | Q96EY5-3         | 2                    | 2              | 12.5                  | 257    | 27050 | 9.4  | Isoform 3 of Q96EY5                                                                                 |
| 2341 | Q96EY5           | 2                    | 2              | 11.7                  | 273    | 28783 | 8.9  | Protein FAM125A                                                                                     |
| 2342 | Q587I9           | 2                    | 3              | 11.6                  | 215    | 21790 | 9.9  | Vesicle transport protein SFT2C                                                                     |
| 2343 | Q969T4           | 2                    | 7              | 11.6                  | 207    | 22913 | 7.2  | Ubiquitin-conjugating enzyme E2 E3                                                                  |
| 2344 | Q9Y324           | 2                    | 2              | 11.6                  | 198    | 23370 | 9.7  | rRNA-processing protein FCF1 homolog                                                                |
| 2345 | Q2MD55           | 2                    | 2              | 11.5                  | 174    | 20081 | 5.1  | B-cell linker protein                                                                               |
| 2346 | Q9BTE1           | 2                    | 10             | 11.5                  | 182    | 20127 | 8    | Dynactin subunit 5                                                                                  |
| 2347 | Q12981           | 2                    | 2              | 11.4                  | 228    | 26132 | 8.9  | Vesicle transport protein SEC20                                                                     |

| No.  | Accession Number | Unique Peptide Count | Spectrum Count | Sequence Coverage (%) | Length | MolWt | pI  | Descriptive Name                                                                                                            |
|------|------------------|----------------------|----------------|-----------------------|--------|-------|-----|-----------------------------------------------------------------------------------------------------------------------------|
| 2347 | UPI000002AF30    | 2                    | 2              | 11.4                  | 228    | 26217 | 9.1 | BCL2/adenovirus E1B 19kD interacting protein 1 isoform BNIP1                                                                |
| 2347 | UPI000013019D    | 2                    | 2              | 9.6                   | 271    | 31198 | 9.1 | BCL2/adenovirus E1B 19kD interacting protein 1 isoform BNIP1-b                                                              |
| 2347 | Q12981-1         | 2                    | 2              | 9.6                   | 271    | 31113 | 8.9 | Isoform 3 of Q12981                                                                                                         |
| 2348 | P35754           | 2                    | 5              | 11.3                  | 106    | 11776 | 8.1 | Glutaredoxin-1                                                                                                              |
| 2349 | Q16763           | 2                    | 4              | 11.3                  | 222    | 23845 | 8.4 | Ubiquitin-conjugating enzyme E2 S                                                                                           |
| 2350 | P61599           | 2                    | 8              | 11.2                  | 178    | 20368 | 5   | N-acetyltransferase 5                                                                                                       |
| 2351 | Q6NVV8           | 2                    | 9              | 11.7                  | 231    | 25635 | 6.6 | IAH1 protein                                                                                                                |
| 2351 | Q6PCA9           | 2                    | 9              | 11.5                  | 234    | 25845 | 6   | IAH1 protein                                                                                                                |
| 2351 | Q05D21           | 2                    | 9              | 11.2                  | 240    | 26443 | 6.5 | IAH1 protein                                                                                                                |
| 2351 | Q2TAA2           | 2                    | 9              | 10.9                  | 248    | 27599 | 5.3 | Isoamyl acetate-hydrolyzing esterase 1 homolog                                                                              |
| 2352 | Q53FT3           | 2                    | 5              | 11.2                  | 197    | 21628 | 5.5 | Uncharacterized protein C11orf73                                                                                            |
| 2353 | Q6FIG5           | 2                    | 2              | 11.2                  | 197    | 21963 | 7.4 | FN3KRP protein                                                                                                              |
| 2353 | Q9HA64           | 2                    | 2              | 7.1                   | 309    | 34412 | 7.3 | Ketosamine-3-kinase                                                                                                         |
| 2354 | Q9Y5Z4-2         | 2                    | 3              | 12.5                  | 184    | 20859 | 4.8 | Isoform 2 of Q9Y5Z4                                                                                                         |
| 2354 | Q9Y5Z4           | 2                    | 3              | 11.2                  | 205    | 22875 | 4.6 | Heme-binding protein 2                                                                                                      |
| 2355 | Q8WZA0           | 2                    | 6              | 11.1                  | 190    | 21495 | 4.9 | Protein LZIC                                                                                                                |
| 2356 | Q9HC07           | 2                    | 7              | 11.1                  | 324    | 34906 | 7   | Transmembrane protein 165                                                                                                   |
| 2357 | Q08AR5           | 2                    | 3              | 11                    | 246    | 27857 | 8.5 | ZRF1 protein                                                                                                                |
| 2357 | UPI00001AE640    | 2                    | 3              | 4.8                   | 568    | 65914 | 9.1 | Zuotin-related factor 1 (M-phase phosphoprotein 11).                                                                        |
| 2357 | Q99543-2         | 2                    | 3              | 4.8                   | 568    | 65814 | 9   | Isoform 2 of Q99543                                                                                                         |
| 2357 | UPI000020F858    | 2                    | 3              | 4.3                   | 621    | 71996 | 8.7 | zuotin related factor 1                                                                                                     |
| 2357 | Q99543           | 2                    | 3              | 4.3                   | 621    | 71897 | 8.6 | DnaJ homolog subfamily C member 2                                                                                           |
| 2358 | Q9UMS0           | 2                    | 7              | 14.3                  | 196    | 21802 | 4.3 | NFU1 iron-sulfur cluster scaffold homolog                                                                                   |
| 2358 | Q7Z5B1           | 2                    | 7              | 12.2                  | 230    | 25924 | 4.7 | Cytosolic iron-sulfur cluster scaffold protein Nfu                                                                          |
| 2358 | Q7Z2Y4           | 2                    | 7              | 11.6                  | 242    | 27114 | 6   | Hypothetical protein DKFZp686H1983                                                                                          |
| 2358 | Q6VNZ8           | 2                    | 7              | 11                    | 254    | 28460 | 5.2 | NifU-like protein HIRIP5                                                                                                    |
| 2358 | Q7Z5B2           | 2                    | 7              | 11                    | 254    | 28463 | 5.1 | Iron-sulfur cluster scaffold protein Nfu                                                                                    |
| 2359 | Q5W145           | 2                    | 3              | 12.9                  | 155    | 18479 | 5.5 | NADH dehydrogenase (Ubiquinone) 1 beta subcomplex, 8, 19kDa                                                                 |
| 2359 | O95169           | 2                    | 3              | 10.8                  | 186    | 21766 | 6.8 | NADH dehydrogenase [ubiquinone] 1 beta subcomplex subunit 8, mitochondrial precursor                                        |
| 2360 | P08397           | 2                    | 8              | 10.8                  | 361    | 39330 | 7.2 | Porphobilinogen deaminase                                                                                                   |
| 2361 | Q9Y3C8           | 2                    | 4              | 10.8                  | 167    | 19458 | 7.4 | Ufm1-conjugating enzyme 1                                                                                                   |
| 2361 | UPI0000167880    | 2                    | 4              | 10.8                  | 167    | 19467 | 7.5 | Ufm1-conjugating enzyme 1                                                                                                   |
| 2362 | Q53EX1           | 2                    | 5              | 10.7                  | 419    | 47535 | 7.9 | BCS1-like variant                                                                                                           |
| 2362 | Q9Y276           | 2                    | 5              | 10.7                  | 419    | 47534 | 8.5 | Mitochondrial chaperone BCS1                                                                                                |
| 2363 | Q9GZQ3           | 2                    | 2              | 10.7                  | 224    | 24670 | 7   | COMM domain-containing protein 5                                                                                            |
| 2364 | O14494           | 2                    | 4              | 10.6                  | 284    | 32156 | 8   | Lipid phosphate phosphohydrolase 1                                                                                          |
| 2365 | P31483           | 2                    | 8              | 10.6                  | 386    | 42961 | 8.2 | Nucleolysin TIA-1 isoform p40 (RNA-binding protein TIA-1) (p40-TIA-1) [Contains: Nucleolysin TIA-1 isoform p15 (p15-TIA-1)] |
| 2365 | UPI0000161C6C    | 2                    | 8              | 10.6                  | 386    | 42962 | 8   | TIA1 protein isoform 2                                                                                                      |
| 2365 | Q53SS9           | 2                    | 8              | 10.6                  | 386    | 42963 | 7.8 | Hypothetical protein TIA1                                                                                                   |
| 2365 | Q59G98           | 2                    | 8              | 8.8                   | 464    | 51330 | 7.8 | TIA1 protein variant                                                                                                        |

| No.  | Accession Number | Unique Peptide Count | Spectrum Count | Sequence Coverage (%) | Length | MolWt  | pI   | Descriptive Name                                                                                                                                                      |
|------|------------------|----------------------|----------------|-----------------------|--------|--------|------|-----------------------------------------------------------------------------------------------------------------------------------------------------------------------|
| 2366 | Q00765           | 2                    | 38             | 10.6                  | 189    | 21493  | 8.1  | Receptor expression-enhancing protein 5                                                                                                                               |
| 2367 | Q86WV7           | 2                    | 5              | 10.6                  | 227    | 25564  | 4.9  | Hypothetical protein                                                                                                                                                  |
| 2367 | UPI0000456ABD    | 2                    | 5              | 10.6                  | 227    | 25757  | 5    | Coiled-coil domain-containing protein 43.                                                                                                                             |
| 2368 | P35249           | 2                    | 3              | 10.5                  | 363    | 39682  | 8    | Replication factor C subunit 4                                                                                                                                        |
| 2369 | P08590           | 2                    | 22             | 10.3                  | 195    | 21932  | 5.1  | Myosin light polypeptide 3                                                                                                                                            |
| 2370 | P63302           | 2                    | 2              | 10.3                  | 87     | 9401   | 9.1  | Selenoprotein W                                                                                                                                                       |
| 2370 | UPI0000161B36    | 2                    | 2              | 10.3                  | 87     | 9298   | 9.2  | selenoprotein W, 1                                                                                                                                                    |
| 2370 | UPI0000456CEF    | 2                    | 2              | 10.1                  | 89     | 9561   | 8.9  | Selenoprotein W.                                                                                                                                                      |
| 2371 | Q9BUH6           | 2                    | 4              | 10.3                  | 204    | 21640  | 5.5  | Uncharacterized protein C9orf142                                                                                                                                      |
| 2372 | O75935-3         | 2                    | 9              | 12                    | 158    | 18001  | 6    | Isoform 3 of O75935                                                                                                                                                   |
| 2372 | O75935           | 2                    | 9              | 10.2                  | 186    | 21119  | 5.5  | Dynactin subunit 3                                                                                                                                                    |
| 2373 | Q8N6S5           | 2                    | 3              | 10.2                  | 226    | 24676  | 6.3  | ADP-ribosylation-like factor 6 interacting protein 6                                                                                                                  |
| 2374 | O00194           | 2                    | 3              | 10.1                  | 218    | 24608  | 5.5  | Ras-related protein Rab-27B                                                                                                                                           |
| 2375 | Q5VXF4           | 2                    | 4              | 10.1                  | 326    | 35290  | 6.6  | Fibronectin type III domain containing 3A                                                                                                                             |
| 2375 | UPI00001C1F5D    | 2                    | 4              | 2.9                   | 1142   | 125822 | 7.1  | fibronectin type III domain containing 3A isoform 2                                                                                                                   |
| 2375 | Q9Y2H6           | 2                    | 4              | 2.9                   | 1134   | 125054 | 7.1  | Fibronectin type-III domain-containing protein 3a                                                                                                                     |
| 2375 | Q6EVH4           | 2                    | 4              | 2.8                   | 1198   | 131852 | 6.7  | Gene expressed in odontoblast protein                                                                                                                                 |
| 2376 | Q712K3           | 2                    | 4              | 10.1                  | 238    | 27166  | 4.4  | Ubiquitin-conjugating enzyme E2 R2                                                                                                                                    |
| 2377 | Q96H20           | 2                    | 4              | 10.1                  | 258    | 28864  | 6.7  | Vacuolar sorting protein SNF8                                                                                                                                         |
| 2377 | Q96H20-2         | 2                    | 4              | 10.1                  | 257    | 28736  | 6.4  | Isoform 2 of Q96H20                                                                                                                                                   |
| 2378 | Q9BT09           | 2                    | 8              | 10.1                  | 278    | 30748  | 5.5  | Trinucleotide repeat-containing protein 5                                                                                                                             |
| 2379 | P24311           | 2                    | 15             | 10                    | 80     | 9160   | 10.3 | Cytochrome c oxidase polypeptide VIIb, mitochondrial precursor                                                                                                        |
| 2380 | P51159-2         | 2                    | 4              | 10.3                  | 213    | 24041  | 5.7  | Isoform Short of P51159                                                                                                                                               |
| 2380 | P51159           | 2                    | 4              | 10                    | 221    | 24868  | 5.2  | Ras-related protein Rab-27A                                                                                                                                           |
| 2380 | Q6IAS8           | 2                    | 4              | 10                    | 221    | 24898  | 5.2  | RAB27A protein                                                                                                                                                        |
| 2381 | Q16563           | 2                    | 14             | 10                    | 259    | 28565  | 8.4  | Synaptophysin-like protein 1                                                                                                                                          |
| 2382 | UPI0000411C6A    | 2                    | 3              | 11.6                  | 258    | 29140  | 8    | RCD1 required for cell differentiation1 homolog                                                                                                                       |
| 2382 | UPI0000ED4E8A    | 2                    | 3              | 11.2                  | 268    | 30485  | 8    | RCD1 required for cell differentiation1 homol                                                                                                                         |
| 2382 | Q92600           | 2                    | 3              | 10                    | 299    | 33631  | 8    | Protein RCD1 homolog                                                                                                                                                  |
| 2383 | P45877           | 2                    | 6              | 9.9                   | 212    | 22763  | 8.4  | Peptidyl-prolyl cis-trans isomerase C                                                                                                                                 |
| 2384 | Q9BZK7           | 2                    | 4              | 9.9                   | 514    | 55595  | 5.6  | F-box-like/WD repeat protein TBL1XR1                                                                                                                                  |
| 2384 | UPI00004571A4    | 2                    | 4              | 9.9                   | 514    | 55573  | 5.5  | F-box-like/WD repeat protein TBL1XR1 (Transducin beta-like 1X-related protein 1) (Nuclear receptor corepressor/HDAC3 complex subunit TBLR1) (TBL1-related protein 1). |
| 2385 | Q9H1E3           | 2                    | 3              | 9.9                   | 243    | 27296  | 5.1  | Nuclear ubiquitous casein and cyclin-dependent kinases substrate                                                                                                      |
| 2386 | P10109           | 2                    | 37             | 9.8                   | 184    | 19393  | 5.8  | Adrenodoxin, mitochondrial precursor                                                                                                                                  |
| 2387 | P50461           | 2                    | 2              | 9.8                   | 194    | 20969  | 8.5  | Cysteine and glycine-rich protein 3                                                                                                                                   |
| 2388 | Q7Z2Q5           | 2                    | 3              | 10                    | 429    | 46405  | 6.6  | C-terminal binding protein 1                                                                                                                                          |
| 2388 | Q13363           | 2                    | 3              | 9.8                   | 440    | 47535  | 6.8  | C-terminal-binding protein 1                                                                                                                                          |
| 2388 | Q4KMQ8           | 2                    | 3              | 9.8                   | 440    | 47501  | 6.8  | C-terminal binding protein 1                                                                                                                                          |

| No.  | Accession Number | Unique Peptide Count | Spectrum Count | Sequence Coverage (%) | Length | MolWt  | pI  | Descriptive Name                                                                                                       |
|------|------------------|----------------------|----------------|-----------------------|--------|--------|-----|------------------------------------------------------------------------------------------------------------------------|
| 2389 | Q9BSK0           | 2                    | 2              | 9.8                   | 173    | 18914  | 9.6 | MARVEL domain-containing protein 1                                                                                     |
| 2390 | UPI0000F58EC8    | 2                    | 10             | 9.8                   | 1075   | 121363 | 6.2 | protein expressed in prostate, ovary, testis, and placenta 2                                                           |
| 2391 | Q96N63           | 2                    | 19             | 19.8                  | 121    | 13202  | 7.2 | CDNA FLJ31361 fis, clone MESAN2008460, highly similar to Homo sapiens SL15 protein mRNA                                |
| 2391 | Q96K24           | 2                    | 19             | 19                    | 126    | 13431  | 9   | CDNA FLJ14836 fis, clone OVARC1001702                                                                                  |
| 2391 | UPI000013E72D    | 2                    | 19             | 18.9                  | 127    | 13615  | 9   | Mannose-P-dolichol utilization defect 1 protein (Suppressor of Lec15 and Lec35 glycosylation mutation homolog) (SL15). |
| 2391 | Q9H3L2           | 2                    | 19             | 11.4                  | 211    | 22609  | 8.3 | My008 protein                                                                                                          |
| 2391 | O75352           | 2                    | 19             | 9.7                   | 247    | 26707  | 9.1 | Mannose-P-dolichol utilization defect 1 protein                                                                        |
| 2391 | UPI000013CCA4    | 2                    | 19             | 9.7                   | 247    | 26638  | 8.9 | mannose-P-dolichol utilization defect 1                                                                                |
| 2391 | Q9BUU8           | 2                    | 19             | 9.7                   | 247    | 26668  | 8.9 | Mannose-P-dolichol utilization defect 1                                                                                |
| 2391 | Q1HDL3           | 2                    | 19             | 8                     | 299    | 32006  | 7.6 | HBeAg-binding protein 2 binding protein A                                                                              |
| 2392 | Q96PJ7           | 2                    | 3              | 11.8                  | 211    | 23758  | 8.7 | Ras-related GTP-binding protein RAB39                                                                                  |
| 2392 | UPI0000D622F3    | 2                    | 3              | 11.7                  | 213    | 23958  | 8.5 | Ras-related protein Rab-34 (Rab-39) (Ras-related protein Rah).                                                         |
| 2392 | Q6NXT3           | 2                    | 3              | 9.7                   | 259    | 29071  | 7.9 | RAB34 protein                                                                                                          |
| 2392 | UPI000015D94E    | 2                    | 3              | 9.7                   | 259    | 29058  | 7.9 | RAB39                                                                                                                  |
| 2392 | Q9BZG1           | 2                    | 3              | 9.7                   | 259    | 29044  | 7.9 | Ras-related protein Rab-34                                                                                             |
| 2393 | P46109           | 2                    | 3              | 9.6                   | 303    | 33777  | 6.7 | Crk-like protein                                                                                                       |
| 2394 | Q7Z677           | 2                    | 2              | 11.4                  | 132    | 15554  | 4.9 | Hypothetical protein DKFZp779P0659                                                                                     |
| 2394 | Q53YA7           | 2                    | 2              | 11.3                  | 133    | 16011  | 8.1 | Adaptor-related protein complex 1, sigma 1 subunit                                                                     |
| 2394 | UPI000013E6B0    | 2                    | 2              | 10.3                  | 146    | 17448  | 7.1 | UPI000013E6B0 UniRef100 entry                                                                                          |
| 2394 | P56377           | 2                    | 2              | 9.6                   | 157    | 18615  | 5.5 | AP-1 complex subunit sigma-2                                                                                           |
| 2394 | P61966           | 2                    | 2              | 9.5                   | 158    | 18733  | 5.7 | AP-1 complex subunit sigma-1A                                                                                          |
| 2394 | UPI00006C18A3    | 2                    | 2              | 7.2                   | 207    | 24133  | 9.3 | PREDICTED: similar to adaptor-related protein complex 1 sigma 2 subunit                                                |
| 2394 | UPI00006C17F0    | 2                    | 2              | 7.2                   | 207    | 24192  | 9.4 | PREDICTED: similar to adaptor-related protein complex 1 sigma 2 subunit                                                |
| 2395 | Q6PI78           | 2                    | 5              | 9.6                   | 240    | 25543  | 8.8 | Transmembrane protein 65                                                                                               |
| 2395 | UPI00003675D1    | 2                    | 5              | 9.6                   | 240    | 25498  | 8.6 | Transmembrane protein 65.                                                                                              |
| 2396 | Q9H3H3           | 2                    | 5              | 9.6                   | 251    | 27383  | 5.6 | Uncharacterized protein C11orf68                                                                                       |
| 2396 | UPI0000228EAB    | 2                    | 5              | 9.6                   | 251    | 27355  | 5.5 | Uncharacterized protein C11orf68 (Basophilic leukemia expressed protein Bles03) (Protein p5326).                       |
| 2397 | A2A2Q2           | 2                    | 5              | 9.5                   | 221    | 25490  | 9.1 | Chromosome 20 open reading frame 44                                                                                    |
| 2397 | Q5T347           | 2                    | 5              | 8.6                   | 243    | 27909  | 9.1 | Chromosome 20 open reading frame 44                                                                                    |
| 2397 | Q5T352           | 2                    | 5              | 8.4                   | 249    | 28939  | 8.8 | Chromosome 20 open reading frame 44                                                                                    |
| 2397 | UPI0000456F84    | 2                    | 5              | 7.7                   | 273    | 31546  | 9   | Basic FGF-repressed Zic-binding protein (bFZb).                                                                        |
| 2397 | Q9NVA1-2         | 2                    | 5              | 7.7                   | 273    | 31517  | 8.8 | Isoform 2 of Q9NVA1                                                                                                    |

| No.  | Accession Number | Unique Peptide Count | Spectrum Count | Sequence Coverage (%) | Length | MolWt | pI  | Descriptive Name                                                                                                            |
|------|------------------|----------------------|----------------|-----------------------|--------|-------|-----|-----------------------------------------------------------------------------------------------------------------------------|
| 2397 | Q9NVA1           | 2                    | 5              | 7                     | 299    | 34572 | 8.8 | Basic FGF-repressed Zic-binding protein                                                                                     |
| 2397 | Q3KRB6           | 2                    | 5              | 7                     | 299    | 34600 | 8.9 | Chromosome 20 open reading frame 44                                                                                         |
| 2397 | UPI0000D61074    | 2                    | 5              | 6.7                   | 313    | 36249 | 8.6 | Basic FGF-repressed Zic-binding protein (bFZb).                                                                             |
| 2398 | UPI0000DD79EA    | 2                    | 27             | 9.5                   | 273    | 30193 | 8.6 | PREDICTED: similar to peptidylprolyl isomerase A isoform 1                                                                  |
| 2399 | Q15427           | 2                    | 15             | 9.4                   | 424    | 44386 | 8.6 | Splicing factor 3B subunit 4                                                                                                |
| 2399 | Q53FG6           | 2                    | 15             | 9.4                   | 424    | 44387 | 8.2 | Splicing factor 3b, subunit 4 variant                                                                                       |
| 2400 | Q0QEY7           | 2                    | 2              | 10.2                  | 255    | 28906 | 8.5 | Succinate dehydrogenase complex subunit B                                                                                   |
| 2400 | P21912           | 2                    | 2              | 9.3                   | 280    | 31630 | 8.8 | Succinate dehydrogenase [ubiquinone] iron-sulfur subunit, mitochondrial precursor                                           |
| 2401 | Q9HD15           | 2                    | 8              | 9.3                   | 236    | 25673 | 7   | Steroid receptor RNA activator 1                                                                                            |
| 2402 | O75940           | 2                    | 7              | 9.2                   | 238    | 26711 | 7.3 | Survival of motor neuron-related-splicing factor 30                                                                         |
| 2403 | Q9C064           | 2                    | 7              | 13.4                  | 276    | 28417 | 7.6 | LYST-interacting protein LIP4                                                                                               |
| 2403 | UPI0000457118    | 2                    | 7              | 13.2                  | 280    | 28857 | 7.6 | Poly(rC)-binding protein 4 (Alpha-CP4).                                                                                     |
| 2403 | P57723-2         | 2                    | 7              | 10.3                  | 360    | 37078 | 8.7 | Isoform 2 of P57723                                                                                                         |
| 2403 | Q9HCU2           | 2                    | 7              | 10                    | 369    | 37858 | 8.4 | RNA binding protein MCG10                                                                                                   |
| 2403 | UPI0000457119    | 2                    | 7              | 9.8                   | 377    | 38834 | 7.2 | Poly(rC)-binding protein 4 (Alpha-CP4).                                                                                     |
| 2403 | Q7Z4Y9           | 2                    | 7              | 9.3                   | 397    | 41345 | 7.9 | CBP                                                                                                                         |
| 2403 | P57723           | 2                    | 7              | 9.2                   | 403    | 41482 | 8.2 | Poly(rC)-binding protein 4                                                                                                  |
| 2403 | Q9GZT1           | 2                    | 7              | 8.7                   | 424    | 43869 | 8.4 | RNA binding protein MCG10                                                                                                   |
| 2404 | Q6UX59           | 2                    | 4              | 9.7                   | 310    | 33524 | 9.3 | DFIT212                                                                                                                     |
| 2404 | Q6IAN0           | 2                    | 4              | 9.2                   | 325    | 35089 | 9.6 | Dehydrogenase/reductase SDR family member 7B                                                                                |
| 2404 | Q9UFM6           | 2                    | 4              | 9.2                   | 325    | 35069 | 9.5 | Hypothetical protein DKFZp566O084                                                                                           |
| 2404 | Q9BTF9           | 2                    | 4              | 9.2                   | 325    | 35119 | 9.6 | Dehydrogenase/reductase (SDR family) member 7B                                                                              |
| 2405 | UPI0000F0A4D4    | 2                    | 5              | 11.7                  | 196    | 21694 | 6.8 | Cob(I)yrinic acid a,c-diamide adenosyltransferase                                                                           |
| 2405 | Q96EY8           | 2                    | 5              | 9.2                   | 250    | 27388 | 8.6 | Cob(I)yrinic acid a,c-diamide adenosyltransferase, mitochondrial precursor (EC 2.5.1.17) (Cob(I)alamin adenosyltransferase) |
| 2406 | Q9GZP9           | 2                    | 8              | 9.2                   | 239    | 27567 | 7.3 | Derlin-2                                                                                                                    |
| 2407 | Q9NYK5           | 2                    | 3              | 9.2                   | 338    | 38722 | 7.6 | Mitochondrial 39S ribosomal protein L39                                                                                     |
| 2407 | UPI00001AEE66    | 2                    | 3              | 9.2                   | 338    | 38712 | 7.6 | Mitochondrial 39S ribosomal protein L39 (L39mt) (MRP-L39) (MRP-L5).                                                         |
| 2407 | UPI00001AEAC0    | 2                    | 3              | 8.8                   | 353    | 40458 | 7.9 | Mitochondrial 39S ribosomal protein L39 (L39mt) (MRP-L39) (MRP-L5).                                                         |
| 2407 | Q9NYK5-2         | 2                    | 3              | 8.8                   | 353    | 40468 | 7.9 | Isoform 2 of Q9NYK5                                                                                                         |
| 2408 | P48507           | 2                    | 3              | 9.1                   | 274    | 30727 | 6   | Glutamate-cysteine ligase regulatory subunit                                                                                |
| 2409 | Q5TZX9           | 2                    | 4              | 9.1                   | 232    | 26616 | 9.2 | Vesicle transport through interaction with t-SNAREs homolog 1B                                                              |
| 2409 | Q9UEU0           | 2                    | 4              | 9.1                   | 232    | 26688 | 9   | Vesicle transport through interaction with t-SNAREs homolog 1B                                                              |

| No.  | Accession Number | Unique Peptide Count | Spectrum Count | Sequence Coverage (%) | Length | MolWt  | pI  | Descriptive Name                                                                                                                                                                   |
|------|------------------|----------------------|----------------|-----------------------|--------|--------|-----|------------------------------------------------------------------------------------------------------------------------------------------------------------------------------------|
| 2410 | Q96IZ0           | 2                    | 2              | 9.1                   | 340    | 36568  | 5.4 | PRKC apoptosis WT1 regulator protein                                                                                                                                               |
| 2411 | Q9H5L2           | 2                    | 6              | 9.1                   | 418    | 46982  | 6.7 | CDNA: FLJ23330 fis, clone HEP12654                                                                                                                                                 |
| 2411 | Q9Y2T2           | 2                    | 6              | 9.1                   | 418    | 46939  | 6.9 | AP-3 complex subunit mu-1                                                                                                                                                          |
| 2412 | Q96DI7           | 2                    | 2              | 9                     | 357    | 39311  | 8.1 | WD repeat protein 57                                                                                                                                                               |
| 2413 | UPI0000D616A3    | 2                    | 4              | 9.2                   | 1256   | 145905 | 7   | cytoplasmic FMR1 interacting protein 2                                                                                                                                             |
| 2413 | Q96F07-2         | 2                    | 4              | 9.2                   | 1253   | 145673 | 7.1 | Isoform 2 of Q96F07                                                                                                                                                                |
| 2413 | UPI0000D616A2    | 2                    | 4              | 9.1                   | 1258   | 146231 | 7.1 | cytoplasmic FMR1 interacting protein 2                                                                                                                                             |
| 2413 | Q96F07           | 2                    | 4              | 9                     | 1278   | 148398 | 7.3 | Cytoplasmic FMR1-interacting protein 2                                                                                                                                             |
| 2414 | Q99757           | 2                    | 10             | 9                     | 166    | 18383  | 8.3 | Thioredoxin, mitochondrial precursor                                                                                                                                               |
| 2415 | Q9BUT1           | 2                    | 3              | 9                     | 245    | 26724  | 7.6 | 3-hydroxybutyrate dehydrogenase type 2                                                                                                                                             |
| 2416 | O43731           | 2                    | 8              | 8.9                   | 214    | 25027  | 8.9 | ER lumen protein retaining receptor 3                                                                                                                                              |
| 2416 | Q4V750           | 2                    | 8              | 8.6                   | 220    | 25648  | 8.1 | KDEL (Lys-Asp-Glu-Leu) endoplasmic reticulum protein retention receptor 3                                                                                                          |
| 2416 | O43731-2         | 2                    | 8              | 8.6                   | 220    | 25690  | 8.1 | Isoform 2 of O43731                                                                                                                                                                |
| 2417 | P14550           | 2                    | 12             | 8.9                   | 325    | 36573  | 6.8 | Alcohol dehydrogenase [NADP+]                                                                                                                                                      |
| 2418 | P48729           | 2                    | 3              | 8.9                   | 337    | 38915  | 9.6 | Casein kinase I isoform alpha                                                                                                                                                      |
| 2418 | Q5U046           | 2                    | 3              | 8.9                   | 337    | 38905  | 9.6 | Casein kinase 1, alpha 1                                                                                                                                                           |
| 2418 | P67962           | 2                    | 3              | 8.9                   | 337    | 38901  | 9.6 | Casein kinase I isoform alpha                                                                                                                                                      |
| 2418 | UPI000053FD0F    | 2                    | 3              | 8.2                   | 365    | 41937  | 9.6 | casein kinase 1, alpha 1 isoform 1                                                                                                                                                 |
| 2418 | Q4JJA0           | 2                    | 3              | 8.2                   | 365    | 41938  | 9.5 | Casein kinase 1 alpha 1                                                                                                                                                            |
| 2419 | Q14331           | 2                    | 2              | 8.9                   | 258    | 29172  | 9   | Protein FRG1                                                                                                                                                                       |
| 2420 | Q15041           | 2                    | 50             | 8.9                   | 203    | 23363  | 9.3 | ARL-6-interacting protein 1                                                                                                                                                        |
| 2421 | Q9H0P0           | 2                    | 2              | 8.9                   | 336    | 37948  | 7.1 | Cytosolic 5'-nucleotidase III                                                                                                                                                      |
| 2422 | P17900           | 2                    | 9              | 8.8                   | 193    | 20822  | 5.3 | Ganglioside GM2 activator precursor (GM2-AP) (Cerebroside sulfate activator protein) (Shingolipid activator protein 3) (SAP-3) [Contains: Ganglioside GM2 activator isoform short] |
| 2422 | UPI00001AEC37    | 2                    | 9              | 8.8                   | 193    | 20838  | 5.3 | GM2 ganglioside activator precursor                                                                                                                                                |
| 2423 | Q0P5W4           | 2                    | 2              | 8.8                   | 329    | 35350  | 9.2 | RCE1 protein                                                                                                                                                                       |
| 2424 | UPI00005D556B    | 2                    | 2              | 9.1                   | 296    | 33321  | 7   | ubiquitin fusion degradation 1-like isoform B                                                                                                                                      |
| 2424 | Q541A5           | 2                    | 2              | 8.8                   | 307    | 34500  | 6.7 | Ubiquitin fusion degradation 1-like                                                                                                                                                |
| 2424 | Q92890           | 2                    | 2              | 7.9                   | 343    | 38725  | 6.3 | Ubiquitin fusion degradation protein 1 homolog                                                                                                                                     |
| 2425 | Q9BUB7           | 2                    | 11             | 8.8                   | 260    | 28969  | 8.9 | Transmembrane protein 70                                                                                                                                                           |
| 2426 | P19387           | 2                    | 5              | 8.7                   | 275    | 31441  | 4.9 | DNA-directed RNA polymerase II 33 kDa polypeptide                                                                                                                                  |
| 2427 | P80217           | 2                    | 4              | 8.7                   | 286    | 31514  | 6.1 | Interferon-induced 35 kDa protein                                                                                                                                                  |
| 2427 | UPI0000200E4E    | 2                    | 4              | 8.7                   | 288    | 31777  | 6.1 | Interferon-induced 35 kDa protein (IFP 35).                                                                                                                                        |
| 2427 | P80217-2         | 2                    | 4              | 8.7                   | 288    | 31745  | 6.1 | Isoform 2 of P80217                                                                                                                                                                |
| 2428 | Q4W5A9           | 2                    | 4              | 8.7                   | 309    | 34359  | 4.7 | Hypothetical protein SET7                                                                                                                                                          |
| 2428 | Q8WTS6           | 2                    | 4              | 7.4                   | 366    | 40721  | 4.6 | Histone-lysine N-methyltransferase, H3 lysine-4 specific SET7                                                                                                                      |
| 2429 | UPI000066DA0A    | 2                    | 3              | 9.8                   | 430    | 49916  | 6.2 | Septin-8.                                                                                                                                                                          |
| 2429 | Q92599-2         | 2                    | 3              | 9.8                   | 429    | 49814  | 6.1 | Isoform 2 of Q92599                                                                                                                                                                |

| No.  | Accession Number | Unique Peptide Count | Spectrum Count | Sequence Coverage (%) | Length | MolWt | pI  | Descriptive Name                                                                                                                                   |
|------|------------------|----------------------|----------------|-----------------------|--------|-------|-----|----------------------------------------------------------------------------------------------------------------------------------------------------|
| 2429 | UPI000066DA0B    | 2                    | 3              | 9.5                   | 440    | 50928 | 6.2 | Septin-8.                                                                                                                                          |
| 2429 | UPI000020C588    | 2                    | 3              | 9.5                   | 442    | 51178 | 6.2 | Septin-8.                                                                                                                                          |
| 2429 | UPI000066DA0C    | 2                    | 3              | 9.1                   | 460    | 53163 | 6.5 | Septin-8.                                                                                                                                          |
| 2429 | Q92599           | 2                    | 3              | 8.7                   | 483    | 55756 | 6.3 | Septin-8                                                                                                                                           |
| 2429 | UPI0000457340    | 2                    | 3              | 8.6                   | 487    | 55908 | 6.4 | Septin-8.                                                                                                                                          |
| 2430 | Q96SD6           | 2                    | 4              | 8.7                   | 393    | 44071 | 4.8 | Putative TCPTP-interacting protein                                                                                                                 |
| 2430 | Q9NVQ6           | 2                    | 4              | 7.2                   | 470    | 52118 | 5.1 | CDNA FLJ10579 fis, clone NT2RP2003446                                                                                                              |
| 2430 | Q96TC7           | 2                    | 4              | 7.2                   | 470    | 52070 | 5.1 | Protein FAM82C                                                                                                                                     |
| 2431 | Q0QVZ1           | 2                    | 4              | 9.6                   | 376    | 43217 | 8.7 | Caspase-5/b                                                                                                                                        |
| 2431 | P51878           | 2                    | 4              | 8.6                   | 418    | 47814 | 9   | Caspase-5 precursor (EC 3.4.22.58) (CASP-5) (ICH-3 protease) (TY protease) (ICE(rel)-III) [Contains: Caspase-5 subunit p20; Caspase-5 subunit p10] |
| 2431 | UPI000013D0C0    | 2                    | 4              | 8.6                   | 418    | 47859 | 9   | Caspase-5 precursor (EC 3.4.22.-) (CASP-5) (ICH-3 protease) (TY protease) (ICE(rel)-III) [Contains: Caspase-5 subunit p20; Caspase-5 subunit p10]. |
| 2431 | Q6DJV7           | 2                    | 4              | 8.6                   | 418    | 47829 | 9   | Caspase 5, apoptosis-related cysteine peptidase                                                                                                    |
| 2431 | Q1HBJ3           | 2                    | 4              | 8.6                   | 418    | 47845 | 9   | Caspase 5, apoptosis-related cysteine peptidase                                                                                                    |
| 2431 | Q14DD6           | 2                    | 4              | 8.6                   | 418    | 47775 | 8.9 | Caspase 5, apoptosis-related cysteine peptidase                                                                                                    |
| 2431 | Q0QVZ2           | 2                    | 4              | 8.3                   | 434    | 49692 | 9.2 | Caspase-5/a                                                                                                                                        |
| 2432 | Q92665           | 2                    | 3              | 8.6                   | 395    | 45319 | 9.3 | 28S ribosomal protein S31, mitochondrial precursor                                                                                                 |
| 2432 | UPI0000167B37    | 2                    | 3              | 8.6                   | 395    | 45318 | 9.4 | mitochondrial ribosomal protein S31                                                                                                                |
| 2433 | O43813           | 2                    | 8              | 8.5                   | 399    | 45283 | 7.8 | LanC-like protein 1                                                                                                                                |
| 2433 | Q6FHH6           | 2                    | 8              | 8.5                   | 399    | 45267 | 7.8 | LANCL1 protein                                                                                                                                     |
| 2434 | Q15773           | 2                    | 4              | 8.5                   | 248    | 28147 | 6.9 | Myeloid leukemia factor 2                                                                                                                          |
| 2435 | Q8IUR0           | 2                    | 2              | 8.5                   | 188    | 20783 | 9.7 | Trafficking protein particle complex subunit 5                                                                                                     |
| 2436 | Q9BTY7           | 2                    | 3              | 8.5                   | 390    | 42129 | 4.8 | Brain protein 16                                                                                                                                   |
| 2436 | UPI000013EBB5    | 2                    | 3              | 8.5                   | 390    | 42128 | 4.8 | PREDICTED: similar to brain protein 16                                                                                                             |
| 2437 | Q5VWZ2           | 2                    | 4              | 8.4                   | 237    | 26316 | 7.8 | Lysophospholipase-like protein 1                                                                                                                   |
| 2437 | UPI00000709FC    | 2                    | 4              | 8.4                   | 237    | 26334 | 7.8 | lysophospholipase-like 1                                                                                                                           |
| 2438 | O75911           | 2                    | 4              | 8.3                   | 302    | 33548 | 8.8 | Short-chain dehydrogenase/reductase 3                                                                                                              |
| 2439 | O95456-2         | 2                    | 2              | 9                     | 267    | 30288 | 7.8 | Isoform 2 of O95456                                                                                                                                |
| 2439 | O95456           | 2                    | 2              | 8.3                   | 288    | 32854 | 7.2 | Down syndrome critical region protein 2                                                                                                            |
| 2439 | Q6FHA3           | 2                    | 2              | 8.3                   | 288    | 32840 | 7.2 | DSCR2 protein                                                                                                                                      |
| 2440 | O95758           | 2                    | 3              | 8.3                   | 521    | 56502 | 9.2 | Regulator of differentiation 1                                                                                                                     |
| 2440 | Q5T8V9           | 2                    | 3              | 8.2                   | 524    | 56821 | 9.2 | ROD1 regulator of differentiation 1                                                                                                                |
| 2440 | Q5T4E6           | 2                    | 3              | 7.8                   | 552    | 59690 | 9   | ROD1 regulator of differentiation 1                                                                                                                |
| 2440 | O95758-2         | 2                    | 3              | 7                     | 614    | 66234 | 9.5 | Isoform 2 of O95758                                                                                                                                |
| 2441 | P06730           | 2                    | 6              | 8.3                   | 217    | 25097 | 6.1 | Eukaryotic translation initiation factor 4E                                                                                                        |
| 2441 | Q32Q75           | 2                    | 6              | 8.3                   | 217    | 25067 | 6.1 | Eukaryotic translation initiation factor 4E                                                                                                        |
| 2442 | UPI0000DD7AE9    | 2                    | 10             | 10.1                  | 268    | 31695 | 8.8 | PREDICTED: similar to LIM and senescent cell antigen-like domains 1                                                                                |



| No.  | Accession Number | Unique Peptide Count | Spectrum Count | Sequence Coverage (%) | Length | MolWt | pI  | Descriptive Name                                                                                                                                                                                                           |
|------|------------------|----------------------|----------------|-----------------------|--------|-------|-----|----------------------------------------------------------------------------------------------------------------------------------------------------------------------------------------------------------------------------|
| 2442 | P48059           | 2                    | 10             | 8.3                   | 325    | 37251 | 8   | LIM and senescent cell antigen-like containing domain protein 1                                                                                                                                                            |
| 2442 | UPI0000207FB5    | 2                    | 10             | 7                     | 387    | 44390 | 8   | LIM and senescent cell antigen-like containing domain protein 1 (Particularly interesting new Cys-His protein 1) (PINCH-1) (Renal carcinoma antigen NY-REN-48).                                                            |
| 2442 | UPI0000DBEE50    | 2                    | 10             | 6.8                   | 396    | 45508 | 7.9 | LIM and senescent cell antigen-like containing domain protein 3 (Particularly interesting new Cys-His protein 3) (PINCH-3).                                                                                                |
| 2443 | Q7Z5U4           | 2                    | 7              | 8.3                   | 277    | 32166 | 9.4 | SDAD1 protein                                                                                                                                                                                                              |
| 2443 | Q32Q11           | 2                    | 7              | 8.2                   | 279    | 32423 | 9.5 | Hypothetical protein                                                                                                                                                                                                       |
| 2444 | Q86TR7           | 2                    | 13             | 8.2                   | 279    | 30962 | 4.8 | Uncharacterized protein C14orf151                                                                                                                                                                                          |
| 2445 | Q8N4L2           | 2                    | 2              | 8.2                   | 257    | 28081 | 8.7 | Transmembrane protein 55A                                                                                                                                                                                                  |
| 2446 | UPI0000D6168C    | 2                    | 4              | 14.8                  | 142    | 16349 | 4.2 | Protein YIPF5 (YIP1 family member 5) (YPT-interacting protein 1 A) (Five-pass transmembrane protein localizing in the Golgi apparatus and the endoplasmic reticulum 5) (Smooth muscle cell-associated protein 5) (SMAP-5). |
| 2446 | Q969M3           | 2                    | 4              | 8.2                   | 257    | 27989 | 4.4 | Protein YIPF5                                                                                                                                                                                                              |
| 2446 | Q969M3-3         | 2                    | 4              | 7.9                   | 265    | 29107 | 4.5 | Isoform 3 of Q969M3                                                                                                                                                                                                        |
| 2446 | UPI0000D6168B    | 2                    | 4              | 7.8                   | 270    | 29739 | 4.5 | Protein YIPF5 (YIP1 family member 5) (YPT-interacting protein 1 A) (Five-pass transmembrane protein localizing in the Golgi apparatus and the endoplasmic reticulum 5) (Smooth muscle cell-associated protein 5) (SMAP-5). |
| 2447 | Q9HD42           | 2                    | 3              | 8.2                   | 196    | 21703 | 8.1 | Charged multivesicular body protein 1a                                                                                                                                                                                     |
| 2448 | P57764           | 2                    | 9              | 8.1                   | 484    | 52801 | 5.1 | Gasdermin domain-containing protein 1                                                                                                                                                                                      |
| 2449 | Q15300           | 2                    | 2              | 8.1                   | 593    | 67050 | 6.2 | RET tyrosine kinase/cAMP protein kinase A subunit RI                                                                                                                                                                       |
| 2450 | Q9NZJ9           | 2                    | 5              | 10.6                  | 180    | 20306 | 6.4 | Diphosphoinositol polyphosphate phosphohydrolase 2                                                                                                                                                                         |
| 2450 | Q4AEJ6           | 2                    | 5              | 8.1                   | 234    | 25951 | 6.8 | KIAA0487 protein                                                                                                                                                                                                           |
| 2451 | Q9NXR1-2         | 2                    | 4              | 8.4                   | 335    | 37721 | 5.2 | Isoform 2 of Q9NXR1                                                                                                                                                                                                        |
| 2451 | Q9NXR1           | 2                    | 4              | 8.1                   | 346    | 38808 | 5.3 | Nuclear distribution protein nudE homolog 1                                                                                                                                                                                |
| 2452 | O94903           | 2                    | 3              | 8                     | 275    | 30344 | 7.5 | Proline synthetase co-transcribed bacterial homolog protein                                                                                                                                                                |
| 2453 | Q53GS5           | 2                    | 4              | 8                     | 352    | 39934 | 4.5 | SYAP1 protein variant                                                                                                                                                                                                      |
| 2453 | Q96A49           | 2                    | 4              | 8                     | 352    | 39933 | 4.5 | Synapse-associated protein 1                                                                                                                                                                                               |
| 2454 | Q5XKR6           | 2                    | 14             | 8                     | 373    | 41385 | 7.9 | AUP1 protein                                                                                                                                                                                                               |
| 2454 | UPI0000D611C1    | 2                    | 14             | 8                     | 375    | 41670 | 8.3 | Ancient ubiquitous protein 1 precursor.                                                                                                                                                                                    |
| 2454 | Q68CX8           | 2                    | 14             | 8                     | 375    | 41587 | 8.3 | Hypothetical protein DKFZp686P12272                                                                                                                                                                                        |
| 2454 | Q9Y679-2         | 2                    | 14             | 7.3                   | 410    | 45787 | 8.6 | Isoform Short of Q9Y679                                                                                                                                                                                                    |

| No.  | Accession Number | Unique Peptide Count | Spectrum Count | Sequence Coverage (%) | Length | MolWt | pI   | Descriptive Name                                                                                                                     |
|------|------------------|----------------------|----------------|-----------------------|--------|-------|------|--------------------------------------------------------------------------------------------------------------------------------------|
| 2454 | UPI000013CFAF    | 2                    | 14             | 6.3                   | 474    | 52751 | 7.9  | Ancient ubiquitous protein 1 precursor.                                                                                              |
| 2454 | Q9Y679           | 2                    | 14             | 6.3                   | 476    | 53028 | 8.1  | Ancient ubiquitous protein 1 precursor                                                                                               |
| 2455 | Q6ZWP6           | 2                    | 3              | 8                     | 288    | 31024 | 9.1  | CDNA FLJ90159 fis, clone HEMBB1002465, weakly similar to ACYL-COA DEHYDROGENASE                                                      |
| 2455 | Q9UKU7           | 2                    | 3              | 5.5                   | 415    | 45070 | 7.9  | Acyl-CoA dehydrogenase family member 8, mitochondrial precursor                                                                      |
| 2456 | Q9BTE7           | 2                    | 2              | 8                     | 237    | 27508 | 5.6  | DCN1-like protein 5                                                                                                                  |
| 2457 | P51553           | 2                    | 3              | 7.9                   | 393    | 42794 | 8.5  | Isocitrate dehydrogenase [NAD] subunit gamma, mitochondrial precursor (EC 1.1.1.41) (Isocitric dehydrogenase) (NAD(+)-specific ICDH) |
| 2458 | Q05048           | 2                    | 2              | 7.9                   | 431    | 48358 | 6.6  | Cleavage stimulation factor 50 kDa subunit                                                                                           |
| 2459 | Q2LE81           | 2                    | 3              | 9                     | 244    | 25882 | 9.2  | NADP(H)-dependent retinol dehydrogenase/reductase B1 isoform                                                                         |
| 2459 | Q9BTZ2           | 2                    | 3              | 8.5                   | 260    | 27572 | 7.8  | Dehydrogenase/reductase SDR family member 4                                                                                          |
| 2459 | Q20CR0           | 2                    | 3              | 7.9                   | 278    | 29537 | 8.5  | NADP(H)-dependent retinol dehydrogenase/reductase short isoform                                                                      |
| 2459 | Q71UQ6           | 2                    | 3              | 7.9                   | 278    | 29531 | 8.5  | Hep27-like protein                                                                                                                   |
| 2460 | O60684           | 2                    | 2              | 7.8                   | 536    | 60030 | 5    | Importin alpha-7 subunit                                                                                                             |
| 2460 | UPI0000D61EBB    | 2                    | 2              | 7.8                   | 539    | 60342 | 5    | Importin alpha-7 subunit (Karyopherin alpha-6).                                                                                      |
| 2461 | Q15102           | 2                    | 5              | 7.8                   | 231    | 25734 | 6.8  | Platelet-activating factor acetylhydrolase IB subunit gamma                                                                          |
| 2462 | Q96KB5           | 2                    | 5              | 7.8                   | 322    | 36085 | 5.1  | T-lymphokine-activated killer cell-originated protein kinase                                                                         |
| 2463 | Q9NVT9           | 2                    | 8              | 7.8                   | 282    | 31281 | 5.8  | Armadillo repeat-containing protein 1                                                                                                |
| 2464 | O95218-2         | 2                    | 5              | 8.4                   | 311    | 35304 | 8.8  | Isoform ZIS                                                                                                                          |
| 2464 | Q59F92           | 2                    | 5              | 8.2                   | 316    | 36032 | 9.8  | Zinc finger protein 265 isoform 1 variant                                                                                            |
| 2464 | Q5VV33           | 2                    | 5              | 8.1                   | 320    | 36318 | 9.8  | Zinc finger, RAN-binding domain containing 2                                                                                         |
| 2464 | Q5VV34           | 2                    | 5              | 7.9                   | 330    | 37404 | 10   | Zinc finger, RAN-binding domain containing 2                                                                                         |
| 2464 | Q53GS3           | 2                    | 5              | 7.9                   | 330    | 37332 | 10.1 | Zinc finger protein 265 isoform 1 variant                                                                                            |
| 2464 | O95218           | 2                    | 5              | 7.7                   | 337    | 38223 | 8.7  | Zinc finger Ran-binding domain-containing protein 2                                                                                  |
| 2464 | UPI000013F68D    | 2                    | 5              | 7.7                   | 336    | 38136 | 8.7  | Zinc finger Ran-binding domain-containing protein 2 (Zinc finger protein 265) (Zinc finger, splicing).                               |
| 2465 | P27707           | 2                    | 3              | 7.7                   | 260    | 30519 | 5.2  | Deoxycytidine kinase                                                                                                                 |
| 2465 | Q5TZY7           | 2                    | 3              | 7.7                   | 260    | 30509 | 5.2  | Deoxycytidine kinase                                                                                                                 |
| 2465 | UPI0000F0E9A9    | 2                    | 3              | 7.1                   | 280    | 32618 | 6.1  | deoxycytidine kinase                                                                                                                 |
| 2466 | Q6P147           | 2                    | 14             | 7.7                   | 286    | 31668 | 8.8  | Cytochrome b reductase 1                                                                                                             |
| 2466 | Q9H0Q8           | 2                    | 14             | 7.7                   | 286    | 31638 | 9    | Hypothetical protein DKFZp564E227                                                                                                    |
| 2467 | Q8NFH5           | 2                    | 2              | 7.7                   | 326    | 34774 | 9.1  | Nucleoporin NUP53                                                                                                                    |
| 2468 | UPI000041C7E5    | 2                    | 6              | 8.9                   | 305    | 34756 | 8.4  | replication factor C 3 isoform 2                                                                                                     |
| 2468 | P40938           | 2                    | 6              | 7.6                   | 356    | 40556 | 8.3  | Replication factor C subunit 3                                                                                                       |

| No.  | Accession Number | Unique Peptide Count | Spectrum Count | Sequence Coverage (%) | Length | MolWt | pI  | Descriptive Name                                                                                                                                                  |
|------|------------------|----------------------|----------------|-----------------------|--------|-------|-----|-------------------------------------------------------------------------------------------------------------------------------------------------------------------|
| 2468 | Q5U0C2           | 2                    | 6              | 7.6                   | 356    | 40570 | 8.3 | Replication factor C (Activator 1) 3, 38kDa                                                                                                                       |
| 2469 | P42126-2         | 2                    | 6              | 8.1                   | 285    | 30896 | 8.9 | Isoform 2 of P42126                                                                                                                                               |
| 2469 | P42126           | 2                    | 6              | 7.6                   | 302    | 32816 | 8.6 | 3,2-trans-enoyl-CoA isomerase, mitochondrial precursor (EC 5.3.3.8) (Dodecenoyl-CoA isomerase) (Delta(3),Delta(2)-enoyl-CoA isomerase)                            |
| 2470 | Q13557-8         | 2                    | 6              | 7.9                   | 478    | 54128 | 7.3 | Isoform Delta 6 of Q13557                                                                                                                                         |
| 2470 | UPI0000D615AE    | 2                    | 6              | 7.8                   | 489    | 55378 | 7.7 | Calcium/calmodulin-dependent protein kinase type II delta chain (EC 2.7.11.17) (CaM-kinase II delta chain) (CaM kinase II subunit delta) (CaMK-II subunit delta). |
| 2470 | Q13557-9         | 2                    | 6              | 7.8                   | 488    | 55250 | 7.6 | Isoform Delta 7 of Q13557                                                                                                                                         |
| 2470 | Q13557           | 2                    | 6              | 7.6                   | 499    | 56369 | 7.2 | Calcium/calmodulin-dependent protein kinase type II delta chain                                                                                                   |
| 2470 | Q13557-5         | 2                    | 6              | 7.6                   | 497    | 56102 | 7.3 | Isoform Delta 8 of Q13557                                                                                                                                         |
| 2470 | Q13557-11        | 2                    | 6              | 7.6                   | 498    | 56298 | 7.2 | Isoform Delta 11 of Q13557                                                                                                                                        |
| 2470 | Q13557-3         | 2                    | 6              | 7.5                   | 509    | 57492 | 7.5 | Isoform Delta 3 of Q13557                                                                                                                                         |
| 2470 | Q13557-6         | 2                    | 6              | 7.4                   | 512    | 57773 | 7   | Isoform Delta 9 of Q13557                                                                                                                                         |
| 2470 | Q13557-4         | 2                    | 6              | 7.3                   | 518    | 58344 | 7.2 | Isoform Delta 4 of Q13557                                                                                                                                         |
| 2471 | Q53HT2           | 2                    | 21             | 7.5                   | 279    | 32633 | 9.6 | Elongation of very long chain fatty acids (FEN1/Elo2, SUR4/Elo3, yeast)-like 1 variant                                                                            |
| 2471 | Q9BW60           | 2                    | 21             | 7.5                   | 279    | 32663 | 9.6 | Elongation of very long chain fatty acids protein 1                                                                                                               |
| 2471 | Q8WXU3           | 2                    | 21             | 7.5                   | 279    | 32637 | 9.6 | SSC1/ELOVL1                                                                                                                                                       |
| 2472 | Q7Z528           | 2                    | 4              | 7.5                   | 266    | 30425 | 5.2 | E3-16                                                                                                                                                             |
| 2472 | Q9Y287           | 2                    | 4              | 7.5                   | 266    | 30338 | 5.1 | Integral membrane protein 2B (Transmembrane protein BRI) [Contains: ABri/ADan amyloid peptide]                                                                    |
| 2472 | Q9NX12           | 2                    | 4              | 7.5                   | 266    | 30312 | 5.2 | CDNA FLJ20496 fis, clone KAT08729                                                                                                                                 |
| 2472 | Q96B24           | 2                    | 4              | 7.5                   | 266    | 30368 | 5.1 | Integral membrane protein 2B                                                                                                                                      |
| 2473 | Q8IVD9           | 2                    | 6              | 7.5                   | 361    | 40822 | 5.3 | NudC domain-containing protein 3                                                                                                                                  |
| 2474 | Q8IVM0           | 2                    | 3              | 7.5                   | 306    | 35822 | 6.7 | Coiled-coil domain-containing protein 50                                                                                                                          |
| 2474 | Q8IVM0-2         | 2                    | 3              | 4.8                   | 482    | 56340 | 8.2 | Isoform 2 of Q8IVM0                                                                                                                                               |
| 2475 | Q9H446           | 2                    | 4              | 7.4                   | 243    | 27939 | 4.2 | RWD domain-containing protein 1                                                                                                                                   |
| 2476 | A0SZW4           | 2                    | 3              | 7.5                   | 322    | 36792 | 6.4 | Aryl hydrocarbon receptor interacting protein                                                                                                                     |
| 2476 | A0SZW3           | 2                    | 3              | 7.3                   | 330    | 37666 | 6.2 | Aryl hydrocarbon receptor interacting protein                                                                                                                     |
| 2476 | UPI000013DBC1    | 2                    | 3              | 7.3                   | 330    | 37636 | 6.3 | AH receptor-interacting protein (AIP) (Aryl-hydrocarbon receptor-interacting protein) (Immunophilin homolog ARA9) (HBV-X-associated protein 2).                   |
| 2476 | O00170           | 2                    | 3              | 7.3                   | 330    | 37664 | 6.5 | AH receptor-interacting protein                                                                                                                                   |
| 2476 | A0SZW6           | 2                    | 3              | 7.3                   | 330    | 37617 | 6.2 | Aryl hydrocarbon receptor interacting protein                                                                                                                     |
| 2476 | A0SZW5           | 2                    | 3              | 7.3                   | 330    | 37637 | 6   | Aryl hydrocarbon receptor interacting protein                                                                                                                     |
| 2477 | Q5T6G5           | 2                    | 2              | 9                     | 268    | 29411 | 4.6 | DNAation factor, 45kDa, alpha polypeptide                                                                                                                         |

| No.  | Accession Number | Unique Peptide Count | Spectrum Count | Sequence Coverage (%) | Length | MolWt | pI  | Descriptive Name                                                                                                                          |
|------|------------------|----------------------|----------------|-----------------------|--------|-------|-----|-------------------------------------------------------------------------------------------------------------------------------------------|
| 2477 | O00273           | 2                    | 2              | 7.3                   | 331    | 36522 | 4.8 | DNA fragmentation factor subunit alpha                                                                                                    |
| 2477 | Q53HN4           | 2                    | 2              | 7.3                   | 331    | 36594 | 4.8 | DNAaction factor, 45kDa, alpha polypeptide isoform 1 variant                                                                              |
| 2478 | P49023-2         | 2                    | 4              | 7.7                   | 557    | 60937 | 6.4 | Isoform Alpha of P49023                                                                                                                   |
| 2478 | P49023           | 2                    | 4              | 7.3                   | 591    | 64533 | 6.1 | Paxillin                                                                                                                                  |
| 2478 | UPI00001AE664    | 2                    | 4              | 7.3                   | 587    | 64031 | 6.4 | Paxillin.                                                                                                                                 |
| 2478 | UPI0000D62268    | 2                    | 4              | 7.2                   | 601    | 65738 | 6.5 | Paxillin.                                                                                                                                 |
| 2478 | P49023-3         | 2                    | 4              | 7.1                   | 605    | 66183 | 6.4 | Isoform Gamma of P49023                                                                                                                   |
| 2479 | O00115           | 2                    | 5              | 7.2                   | 360    | 39581 | 8   | Deoxyribonuclease-2-alpha precursor                                                                                                       |
| 2480 | O00625           | 2                    | 12             | 7.2                   | 290    | 32113 | 6.9 | Pirin                                                                                                                                     |
| 2480 | Q6FHD2           | 2                    | 12             | 7.2                   | 290    | 32157 | 6.8 | PIR protein                                                                                                                               |
| 2481 | UPI0000D61CD4    | 2                    | 3              | 7.9                   | 430    | 47710 | 5.1 | Nuclear-interacting partner of ALK (Nuclear-interacting partner of anaplastic lymphoma kinase) (hNIPA) (Zinc finger C3HC-type protein 1). |
| 2481 | Q86WB0-3         | 2                    | 3              | 7.9                   | 431    | 47771 | 5.2 | Isoform 3 of Q86WB0                                                                                                                       |
| 2481 | A4D1L4           | 2                    | 3              | 7.1                   | 481    | 53603 | 6.2 | Nuclear interacting partner of anaplastic lymphoma kinase                                                                                 |
| 2481 | UPI0000457601    | 2                    | 3              | 7.1                   | 480    | 53498 | 6.2 | Nuclear-interacting partner of ALK (Nuclear-interacting partner of anaplastic lymphoma kinase) (hNIPA) (Zinc finger C3HC-type protein 1). |
| 2481 | Q86WB0-2         | 2                    | 3              | 7.1                   | 481    | 53559 | 6.4 | Isoform 2 of Q86WB0                                                                                                                       |
| 2481 | UPI0000457602    | 2                    | 3              | 6.8                   | 501    | 55200 | 5.5 | Nuclear-interacting partner of ALK (Nuclear-interacting partner of anaplastic lymphoma kinase) (hNIPA) (Zinc finger C3HC-type protein 1). |
| 2481 | Q86WB0           | 2                    | 3              | 6.8                   | 502    | 55262 | 5.6 | Nuclear-interacting partner of ALK                                                                                                        |
| 2482 | Q6FIC8           | 2                    | 10             | 9.5                   | 241    | 26900 | 7.6 | DNAJB6 protein (DnaJ (Hsp40) homolog, subfamily B, member 6)                                                                              |
| 2482 | O75190           | 2                    | 10             | 7.1                   | 326    | 36087 | 9.1 | DnaJ homolog subfamily B member 6                                                                                                         |
| 2482 | Q53EN8           | 2                    | 10             | 7.1                   | 326    | 36117 | 9.1 | DnaJ (Hsp40) homolog, subfamily B, member 6 isoform a variant                                                                             |
| 2482 | Q59EF2           | 2                    | 10             | 6.9                   | 335    | 36772 | 7.2 | DnaJ (Hsp40) homolog, subfamily B, member 6 isoform a variant                                                                             |
| 2483 | Q5TAW7           | 2                    | 4              | 7.1                   | 280    | 32424 | 7.5 | Calcium binding protein 39-like                                                                                                           |
| 2483 | Q9H9S4           | 2                    | 4              | 5.9                   | 337    | 39088 | 8.4 | Calcium-binding protein 39-like                                                                                                           |
| 2484 | Q96EM0           | 2                    | 3              | 7.1                   | 354    | 38168 | 6.6 | Uncharacterized protein C14orf149                                                                                                         |
| 2484 | Q96LJ5           | 2                    | 3              | 7.1                   | 354    | 38138 | 6.7 | CDNA FLJ25436 fis, clone TST08261                                                                                                         |
| 2485 | O60362           | 2                    | 3              | 7                     | 242    | 27310 | 8.9 | Hypothetical protein 44M2.1                                                                                                               |
| 2485 | Q9NXG2           | 2                    | 3              | 4.8                   | 353    | 39315 | 7.9 | THUMP domain-containing protein 1                                                                                                         |
| 2485 | UPI000059D337    | 2                    | 3              | 3.9                   | 439    | 48549 | 8.8 | THUMP domain-containing protein 1.                                                                                                        |
| 2485 | Q6MZT3           | 2                    | 3              | 3.9                   | 439    | 48491 | 8.9 | Hypothetical protein DKFZp686C1054                                                                                                        |
| 2486 | Q15813           | 2                    | 2              | 7                     | 527    | 59346 | 6.8 | Tubulin-specific chaperone E                                                                                                              |
| 2487 | Q16254           | 2                    | 2              | 7                     | 413    | 43960 | 4.7 | Transcription factor E2F4                                                                                                                 |

| No.  | Accession Number | Unique Peptide Count | Spectrum Count | Sequence Coverage (%) | Length | MolWt | pI  | Descriptive Name                                                                                                                                                                                     |
|------|------------------|----------------------|----------------|-----------------------|--------|-------|-----|------------------------------------------------------------------------------------------------------------------------------------------------------------------------------------------------------|
| 2487 | UPI0000D61A05    | 2                    | 2              | 7                     | 417    | 44403 | 4.8 | Transcription factor E2F4 (E2F-4).                                                                                                                                                                   |
| 2488 | Q7L5D6           | 2                    | 3              | 7                     | 327    | 36504 | 5.4 | UPF0363 protein C7orf20                                                                                                                                                                              |
| 2489 | A2AB02           | 2                    | 5              | 6.9                   | 261    | 29460 | 8.6 | Nurim                                                                                                                                                                                                |
| 2489 | Q8IXM6           | 2                    | 5              | 6.9                   | 262    | 29379 | 8.6 | Nurim                                                                                                                                                                                                |
| 2490 | P42574           | 2                    | 11             | 6.9                   | 277    | 31608 | 6.5 | Caspase-3 precursor (EC 3.4.22.56) (CASP-3) (Apopain) (Cysteine protease CPP32) (Yama protein) (CPP-32) (SREBP cleavage activity 1) (SCA-1) [Contains: Caspase-3 p17 subunit; Caspase-3 p12 subunit] |
| 2491 | Q9NZX8           | 2                    | 2              | 9.1                   | 352    | 40091 | 5   | HSPC058                                                                                                                                                                                              |
| 2491 | Q6AI06           | 2                    | 2              | 8.1                   | 394    | 45424 | 8.8 | Hypothetical protein DKFZp781F2227                                                                                                                                                                   |
| 2491 | Q3ZTU1           | 2                    | 2              | 6.9                   | 466    | 52985 | 6.4 | CTD small phosphatase-like protein 2                                                                                                                                                                 |
| 2491 | Q9P030           | 2                    | 2              | 6.9                   | 466    | 53129 | 6.6 | HSPC129                                                                                                                                                                                              |
| 2491 | Q8IYI9           | 2                    | 2              | 6.9                   | 466    | 52999 | 6.4 | CTDSPL2 protein                                                                                                                                                                                      |
| 2492 | Q5T7L6           | 2                    | 2              | 10.3                  | 242    | 28001 | 5.1 | Stromal cell derived factor 4                                                                                                                                                                        |
| 2492 | UPI000045610D    | 2                    | 2              | 9.8                   | 254    | 27868 | 5.8 | 45 kDa calcium-binding protein precursor (Cab45) (Stromal cell-derived factor 4) (SDF-4).                                                                                                            |
| 2492 | Q9UN53           | 2                    | 2              | 9.8                   | 254    | 27826 | 5.8 | Calcium binding protein                                                                                                                                                                              |
| 2492 | Q5T7L8           | 2                    | 2              | 7.2                   | 348    | 39608 | 5.1 | Stromal cell derived factor 4                                                                                                                                                                        |
| 2492 | Q53G52           | 2                    | 2              | 6.9                   | 362    | 41819 | 4.9 | Calcium binding protein Cab45 variant                                                                                                                                                                |
| 2492 | Q9BRK5           | 2                    | 2              | 6.9                   | 362    | 41807 | 4.9 | 45 kDa calcium-binding protein precursor                                                                                                                                                             |
| 2492 | Q53HQ9           | 2                    | 2              | 6.9                   | 362    | 41777 | 4.9 | Calcium binding protein Cab45 variant                                                                                                                                                                |
| 2493 | Q5JB52           | 2                    | 3              | 7.3                   | 508    | 56467 | 7.6 | Stromal RNA regulating factor                                                                                                                                                                        |
| 2493 | Q5JB51           | 2                    | 3              | 6.9                   | 537    | 59648 | 7.7 | Stromal RNA regulating factor                                                                                                                                                                        |
| 2493 | Q8WVV9           | 2                    | 3              | 6.8                   | 542    | 60083 | 7.7 | Heterogeneous nuclear ribonucleoprotein L-like                                                                                                                                                       |
| 2494 | Q86U42-2         | 2                    | 7              | 7.1                   | 296    | 31497 | 5   | Isoform 2 of Q86U42                                                                                                                                                                                  |
| 2494 | Q86U42           | 2                    | 7              | 6.9                   | 306    | 32749 | 5.1 | Polyadenylate-binding protein 2 (Poly(A)-binding protein 2) (Poly(A)-binding protein II) (PABII) (Polyadenylate-binding nuclear protein 1) (Nuclear poly(A)-binding protein 1)                       |
| 2495 | Q9H0V9           | 2                    | 4              | 6.9                   | 348    | 39711 | 8.4 | VIP36-like protein precursor                                                                                                                                                                         |
| 2495 | Q9H0V9-2         | 2                    | 4              | 6.7                   | 359    | 40982 | 8.9 | Isoform 2 of Q9H0V9                                                                                                                                                                                  |
| 2496 | Q9H9J2           | 2                    | 4              | 6.9                   | 332    | 37535 | 8.4 | 39S ribosomal protein L44, mitochondrial precursor                                                                                                                                                   |
| 2497 | Q9NQZ2           | 2                    | 6              | 6.9                   | 479    | 54558 | 5.6 | Something about silencing protein 10                                                                                                                                                                 |
| 2498 | A0AUJ8           | 2                    | 3              | 6.8                   | 365    | 41750 | 9   | MGC21874 protein                                                                                                                                                                                     |
| 2499 | O43819           | 2                    | 8              | 6.8                   | 266    | 29810 | 8.9 | SCO2 protein homolog, mitochondrial precursor                                                                                                                                                        |
| 2499 | UPI0000167B35    | 2                    | 8              | 6.8                   | 266    | 29751 | 8.6 | cytochrome oxidase deficient homolog 2                                                                                                                                                               |
| 2500 | Q8TAF6           | 2                    | 5              | 7.2                   | 670    | 74422 | 8   | Acyl-CoA synthetase 4                                                                                                                                                                                |
| 2500 | O60488           | 2                    | 5              | 6.8                   | 711    | 79188 | 8.4 | Long-chain-fatty-acid--CoA ligase 4                                                                                                                                                                  |
| 2501 | P51398           | 2                    | 2              | 6.8                   | 398    | 45566 | 8.9 | Mitochondrial 28S ribosomal protein S29                                                                                                                                                              |
| 2502 | Q13287           | 2                    | 2              | 6.8                   | 307    | 35057 | 5.3 | N-myc-interactor                                                                                                                                                                                     |
| 2502 | UPI000002FDB7    | 2                    | 2              | 6.8                   | 307    | 35117 | 5.3 | N-myc and STAT interactor                                                                                                                                                                            |
| 2502 | Q8WTW2           | 2                    | 2              | 6.8                   | 307    | 35085 | 5.3 | N-myc (And STAT) interactor                                                                                                                                                                          |
| 2503 | Q96SI1           | 2                    | 3              | 6.7                   | 283    | 31942 | 7.4 | BTB/POZ domain-containing protein KCTD15                                                                                                                                                             |

| No.  | Accession Number | Unique Peptide Count | Spectrum Count | Sequence Coverage (%) | Length | MolWt | pI   | Descriptive Name                                                                                                                                                                                                                                                  |
|------|------------------|----------------------|----------------|-----------------------|--------|-------|------|-------------------------------------------------------------------------------------------------------------------------------------------------------------------------------------------------------------------------------------------------------------------|
| 2504 | Q9UNQ2           | 2                    | 2              | 6.7                   | 313    | 35236 | 10   | Probable dimethyladenosine transferase (EC 2.1.1.-) (S-adenosylmethionine-6-N',N'-adenosyl(rRNA) dimethyltransferase)                                                                                                                                             |
| 2505 | O00743           | 2                    | 2              | 6.6                   | 305    | 35144 | 5.7  | Serine/threonine-protein phosphatase 6                                                                                                                                                                                                                            |
| 2505 | Q9UIC9           | 2                    | 2              | 6.6                   | 303    | 34814 | 5.9  | Serine/threonine protein phosphatase catalytic subunit                                                                                                                                                                                                            |
| 2506 | P20933           | 2                    | 2              | 6.6                   | 346    | 37194 | 6.3  | N(4)-(beta-N-acetylglucosaminy)-L-asparaginase precursor (EC 3.5.1.26) (Glycosylasparaginase) (Aspartylglucosaminidase) (N4-(N-acetyl-beta-glucosaminy)-L-asparagine amidase) (AGA) [Contains: Glycosylasparaginase alpha chain; Glycosylasparaginase beta chain] |
| 2506 | UPI000013D53C    | 2                    | 2              | 6.6                   | 346    | 37208 | 6.3  | N(4)-(beta-N-acetylglucosaminy)-L-asparaginase precursor (EC 3.5.1.26) (Glycosylasparaginase) (Aspartylglucosaminidase) (N4-(N-acetyl-beta-glucosaminy)-L-asparagine amidase) (AGA) [Contains: Glycosylasparaginase alpha chain; Glycosylasparaginase beta c      |
| 2507 | P29279           | 2                    | 2              | 6.6                   | 349    | 38091 | 8    | Connective tissue growth factor precursor                                                                                                                                                                                                                         |
| 2507 | Q6FHL8           | 2                    | 2              | 6.6                   | 349    | 38129 | 7.9  | CTGF protein                                                                                                                                                                                                                                                      |
| 2507 | Q5M8T4           | 2                    | 2              | 6.6                   | 349    | 38069 | 7.9  | Connective tissue growth factor                                                                                                                                                                                                                                   |
| 2508 | P30740           | 2                    | 2              | 6.6                   | 379    | 42742 | 6.3  | Leukocyte elastase inhibitor                                                                                                                                                                                                                                      |
| 2509 | Q15007           | 2                    | 3              | 6.6                   | 396    | 44244 | 5.2  | Wilms' tumor 1-associating protein (WT1-associated protein) (Putative pre-mRNA-splicing regulator female-lethal(2D) homolog)                                                                                                                                      |
| 2510 | UPI0000DD7C47    | 2                    | 5              | 9.5                   | 211    | 24434 | 11.8 | PREDICTED: similar to ribonucleic acid binding protein S1 isoform 1                                                                                                                                                                                               |
| 2510 | UPI00006C085C    | 2                    | 5              | 7.1                   | 282    | 31610 | 11.9 | PREDICTED: similar to ribonucleic acid binding protein S1 isoform 7                                                                                                                                                                                               |
| 2510 | UPI0000237318    | 2                    | 5              | 7.1                   | 282    | 31591 | 11.8 | PREDICTED: similar to ribonucleic acid binding protein S1                                                                                                                                                                                                         |
| 2510 | Q15287-2         | 2                    | 5              | 7.1                   | 282    | 31709 | 11.9 | Isoform 2 of Q15287                                                                                                                                                                                                                                               |
| 2510 | Q15287           | 2                    | 5              | 6.6                   | 305    | 34208 | 11.8 | RNA-binding protein with serine-rich domain 1                                                                                                                                                                                                                     |
| 2510 | UPI00006C085B    | 2                    | 5              | 6.6                   | 305    | 34109 | 11.8 | PREDICTED: similar to ribonucleic acid binding protein S1 isoform 3                                                                                                                                                                                               |
| 2510 | UPI00001618F9    | 2                    | 5              | 6.6                   | 305    | 34090 | 11.8 | PREDICTED: similar to ribonucleic acid binding protein S1                                                                                                                                                                                                         |
| 2511 | Q86XZ2           | 2                    | 4              | 7.1                   | 435    | 50738 | 6.7  | PPP2R5E protein                                                                                                                                                                                                                                                   |
| 2511 | Q58EX4           | 2                    | 4              | 7                     | 441    | 51523 | 7.4  | PPP2R5E protein                                                                                                                                                                                                                                                   |

| No.  | Accession Number | Unique Peptide Count | Spectrum Count | Sequence Coverage (%) | Length | MolWt | pI   | Descriptive Name                                                                         |
|------|------------------|----------------------|----------------|-----------------------|--------|-------|------|------------------------------------------------------------------------------------------|
| 2511 | Q16537           | 2                    | 4              | 6.6                   | 467    | 54699 | 6.9  | Serine/threonine-protein phosphatase 2A 56 kDa regulatory subunit epsilon isoform        |
| 2511 | Q562F2           | 2                    | 4              | 6.6                   | 467    | 54681 | 6.9  | Protein phosphatase 2, regulatory subunit B', epsilon isoform                            |
| 2511 | Q3ZCW9           | 2                    | 4              | 6.6                   | 467    | 54704 | 7.2  | PPP2R5E protein                                                                          |
| 2511 | Q59EK0           | 2                    | 4              | 6.2                   | 501    | 57956 | 8.2  | Epsilon isoform of regulatory subunit B56, protein phosphatase 2A variant                |
| 2512 | Q9UBP9           | 2                    | 2              | 6.6                   | 304    | 34490 | 7.9  | GULP engulfment adaptor PTB domain-containing protein 1                                  |
| 2513 | Q9UMY1           | 2                    | 2              | 6.6                   | 257    | 29426 | 9.7  | Nucleolar protein 7                                                                      |
| 2514 | Q9H0E2           | 2                    | 9              | 8.4                   | 274    | 30282 | 6    | Toll-interacting protein                                                                 |
| 2514 | Q59FB9           | 2                    | 9              | 6.5                   | 352    | 38895 | 8.5  | Toll interacting protein variant                                                         |
| 2514 | UPI0000D6257D    | 2                    | 9              | 6.5                   | 355    | 39151 | 8.8  | Toll-interacting protein.                                                                |
| 2515 | Q5HYL6           | 2                    | 5              | 6.5                   | 352    | 39555 | 5.2  | Hypothetical protein DKFZp686E1899                                                       |
| 2515 | Q9NYL9           | 2                    | 5              | 6.5                   | 352    | 39595 | 5.2  | Tropomodulin-3                                                                           |
| 2516 | Q6UXH1-3         | 2                    | 2              | 8.1                   | 284    | 30712 | 5.1  | Isoform 3 of Q6UXH1                                                                      |
| 2516 | Q6UXH1-2         | 2                    | 2              | 7.2                   | 321    | 34958 | 4.6  | Isoform 2 of Q6UXH1                                                                      |
| 2516 | Q6UXH1-4         | 2                    | 2              | 7.1                   | 325    | 35288 | 4.7  | Isoform 4 of Q6UXH1                                                                      |
| 2516 | Q6UXH1           | 2                    | 2              | 6.5                   | 353    | 38192 | 4.6  | Cysteine-rich with EGF-like domain protein 2 precursor                                   |
| 2516 | UPI000018CEC3    | 2                    | 2              | 6.5                   | 353    | 38104 | 4.6  | cysteine-rich with EGF-like domains 2                                                    |
| 2516 | Q6UXH1-6         | 2                    | 2              | 6.2                   | 373    | 40491 | 4.8  | Isoform 6 of Q6UXH1                                                                      |
| 2516 | Q6UXH1-5         | 2                    | 2              | 5.7                   | 402    | 43579 | 4.8  | Isoform 5 of Q6UXH1                                                                      |
| 2517 | Q96MH6-2         | 2                    | 3              | 8.2                   | 257    | 29542 | 7.4  | Isoform 2 of Q96MH6                                                                      |
| 2517 | Q96MH6           | 2                    | 3              | 6.5                   | 324    | 37425 | 7.9  | Transmembrane protein 68                                                                 |
| 2518 | Q9C0B1           | 2                    | 8              | 6.5                   | 507    | 58456 | 5.2  | KIAA1752 protein                                                                         |
| 2518 | UPI000013D7B3    | 2                    | 8              | 6.5                   | 505    | 58282 | 5.2  | fatso                                                                                    |
| 2519 | Q6ZTV1           | 2                    | 2              | 10.8                  | 362    | 39472 | 5.9  | CDNA FLJ44194 fis, clone THYMU2040975, weakly similar to PTB- ASSOCIATED SPLICING FACTOR |
| 2519 | A2AIB8           | 2                    | 2              | 6.4                   | 613    | 68042 | 5.5  | KIAA1949                                                                                 |
| 2519 | UPI00006C0AE4    | 2                    | 2              | 6.4                   | 613    | 67844 | 5.4  | PREDICTED: similar to Protein KIAA1949 isoform 7                                         |
| 2519 | Q6NYC8           | 2                    | 2              | 6.4                   | 613    | 67943 | 5.4  | Uncharacterized protein KIAA1949                                                         |
| 2520 | O75683           | 2                    | 4              | 6.4                   | 361    | 41450 | 10.6 | Surfeit locus protein 6                                                                  |
| 2521 | Q53GI6           | 2                    | 8              | 6.4                   | 437    | 50409 | 4.8  | Synaptonemal complex protein SC65 variant                                                |
| 2521 | Q92791           | 2                    | 8              | 6.4                   | 437    | 50381 | 4.8  | Nucleolar autoantigen No55                                                               |
| 2522 | O14817           | 2                    | 5              | 6.3                   | 238    | 26118 | 6.5  | Tetraspanin-4                                                                            |
| 2523 | P15586           | 2                    | 3              | 6.3                   | 552    | 62082 | 8.3  | N-acetylglucosamine-6-sulfatase precursor                                                |
| 2524 | P25774           | 2                    | 6              | 6.3                   | 331    | 37496 | 8.3  | Cathepsin S precursor                                                                    |
| 2524 | Q6FHS5           | 2                    | 6              | 6.3                   | 331    | 37526 | 8.2  | CTSS protein                                                                             |
| 2525 | Q86WV4           | 2                    | 4              | 8.3                   | 302    | 35148 | 9.1  | MRPS9 protein                                                                            |
| 2525 | P82933           | 2                    | 4              | 6.3                   | 396    | 45823 | 9.6  | 28S ribosomal protein S9, mitochondrial precursor                                        |
| 2525 | Q6PG40           | 2                    | 4              | 6.3                   | 396    | 45835 | 9.5  | Mitochondrial ribosomal protein S9                                                       |
| 2526 | Q9NWL0           | 2                    | 2              | 8.2                   | 280    | 31863 | 5.3  | CDNA FLJ20758 fis, clone HEP01508                                                        |
| 2526 | Q597H0           | 2                    | 2              | 6.3                   | 367    | 41893 | 6.3  | Transformation-related protein 15                                                        |
| 2526 | Q658Y9           | 2                    | 2              | 6.3                   | 367    | 41919 | 6.3  | Hypothetical protein DKFZp666K071                                                        |
| 2526 | Q9BUZ8           | 2                    | 2              | 5.7                   | 402    | 46050 | 6.2  | PTCD3 protein                                                                            |

| No.  | Accession Number | Unique Peptide Count | Spectrum Count | Sequence Coverage (%) | Length | MolWt  | pI  | Descriptive Name                                                                                |
|------|------------------|----------------------|----------------|-----------------------|--------|--------|-----|-------------------------------------------------------------------------------------------------|
| 2526 | UPI0000456DED    | 2                    | 2              | 3.3                   | 690    | 78624  | 6.4 | Pentatricopeptide repeat domain 3                                                               |
| 2526 | Q96EY7           | 2                    | 2              | 3.3                   | 689    | 78550  | 6.4 | Pentatricopeptide repeat domain-containing protein 3                                            |
| 2527 | Q05D88           | 2                    | 4              | 6.2                   | 453    | 53181  | 9.4 | Hypothetical protein                                                                            |
| 2527 | Q9Y5B6-2         | 2                    | 4              | 3.4                   | 815    | 93170  | 5.7 | Isoform B of Q9Y5B6                                                                             |
| 2527 | Q9Y5B6           | 2                    | 4              | 3.1                   | 917    | 104804 | 5.7 | GC-rich sequence DNA-binding factor homolog                                                     |
| 2528 | Q13190-3         | 2                    | 2              | 8.2                   | 267    | 29887  | 9.2 | Isoform 3 of Q13190                                                                             |
| 2528 | UPI0000DD80F5    | 2                    | 2              | 7.5                   | 295    | 33137  | 8   | PREDICTED: similar to Syntaxin-5                                                                |
| 2528 | Q13190           | 2                    | 2              | 6.2                   | 355    | 39673  | 9.2 | Syntaxin-5                                                                                      |
| 2529 | Q92604           | 2                    | 2              | 6.2                   | 370    | 43089  | 8.9 | Acyl-CoA:lysophosphatidylglycerol acyltransferase 1                                             |
| 2530 | Q96G21           | 2                    | 3              | 6.2                   | 291    | 33757  | 9.5 | U3 small nucleolar ribonucleoprotein protein IMP4                                               |
| 2531 | Q96JY6           | 2                    | 7              | 6.2                   | 352    | 37459  | 8.7 | PDZ and LIM domain protein 2                                                                    |
| 2531 | Q96JY6-3         | 2                    | 7              | 6                     | 366    | 39181  | 8.9 | Isoform 3 of Q96JY6                                                                             |
| 2532 | Q9BRJ2           | 2                    | 4              | 6.2                   | 306    | 35351  | 9   | 39S ribosomal protein L45, mitochondrial precursor                                              |
| 2532 | UPI00001AEFFB    | 2                    | 4              | 6.2                   | 306    | 35243  | 9   | mitochondrial ribosomal protein L45                                                             |
| 2533 | Q9NX31           | 2                    | 5              | 6.2                   | 292    | 31779  | 8.5 | Uncharacterized protein C20orf111                                                               |
| 2534 | Q8WYK3           | 2                    | 2              | 6.8                   | 279    | 31759  | 7   | Thymidylate synthase                                                                            |
| 2534 | P04818           | 2                    | 2              | 6.1                   | 313    | 35716  | 7   | Thymidylate synthase                                                                            |
| 2534 | Q53FB7           | 2                    | 2              | 6.1                   | 313    | 35717  | 6.8 | Thymidylate synthetase variant                                                                  |
| 2535 | P09110           | 2                    | 13             | 6.1                   | 424    | 44292  | 8.4 | 3-ketoacyl-CoA thiolase, peroxisomal precursor                                                  |
| 2536 | Q53GY5           | 2                    | 3              | 6.1                   | 570    | 64487  | 6.7 | DiGeorge syndrome critical region gene 8 variant                                                |
| 2537 | Q6N049           | 2                    | 8              | 6.1                   | 477    | 54252  | 6.9 | Hypothetical protein DKFZp686A05136                                                             |
| 2537 | Q8N404           | 2                    | 8              | 6.1                   | 477    | 54224  | 6.8 | ZWILCH protein                                                                                  |
| 2537 | UPI000013EC73    | 2                    | 8              | 4.9                   | 591    | 67214  | 6.3 | Zwilch                                                                                          |
| 2537 | Q9H900           | 2                    | 8              | 4.9                   | 591    | 67283  | 6.3 | Protein zwilch homolog                                                                          |
| 2538 | O00330           | 2                    | 8              | 6                     | 501    | 54122  | 8.7 | Pyruvate dehydrogenase protein X component, mitochondrial precursor                             |
| 2538 | UPI0000168268    | 2                    | 8              | 6                     | 501    | 54208  | 8.8 | pyruvate dehydrogenase complex, component X                                                     |
| 2539 | P42785           | 2                    | 8              | 6                     | 496    | 55800  | 7.2 | Lysosomal Pro-X carboxypeptidase precursor                                                      |
| 2539 | UPI00001FB052    | 2                    | 8              | 5.8                   | 517    | 58100  | 7.4 | prolylcarboxypeptidase isoform 2 preproprotein                                                  |
| 2540 | Q13547           | 2                    | 8              | 6                     | 482    | 55103  | 5.5 | Histone deacetylase 1                                                                           |
| 2541 | Q59FY9           | 2                    | 10             | 6                     | 600    | 66739  | 5.7 | LEPREL2 protein variant                                                                         |
| 2541 | UPI00001AF55A    | 2                    | 10             | 4.9                   | 735    | 81723  | 6.3 | Probable G-protein coupled receptor 162 (Gene-rich cluster gene A protein).                     |
| 2541 | Q8IVL6           | 2                    | 10             | 4.9                   | 736    | 81837  | 6.3 | Prolyl 3-hydroxylase 3 precursor                                                                |
| 2542 | Q5TDH0           | 2                    | 2              | 6                     | 399    | 44523  | 5   | DNA-damage inducible protein 2                                                                  |
| 2542 | Q7RTZ0           | 2                    | 2              | 5.7                   | 419    | 46571  | 5.1 | Protein DDI1 homolog 2                                                                          |
| 2543 | Q9Y2S7           | 2                    | 2              | 6                     | 368    | 42033  | 8.6 | Polymerase delta-interacting protein 2                                                          |
| 2543 | UPI000013C4D8    | 2                    | 2              | 6                     | 367    | 41934  | 8.6 | Polymerase delta-interacting protein 2 (38 kDa DNA polymerase delta interaction protein) (p38). |
| 2544 | Q8N6T3-3         | 2                    | 6              | 6.1                   | 396    | 43776  | 8.5 | Isoform 3 of Q8N6T3                                                                             |



| No.  | Accession Number | Unique Peptide Count | Spectrum Count | Sequence Coverage (%) | Length | MolWt | pI  | Descriptive Name                                                                                                                                             |
|------|------------------|----------------------|----------------|-----------------------|--------|-------|-----|--------------------------------------------------------------------------------------------------------------------------------------------------------------|
| 2544 | Q53F62           | 2                    | 6              | 5.9                   | 406    | 44669 | 5.4 | ADP-ribosylation factor GTPase activating protein 1 isoform a variant                                                                                        |
| 2544 | Q8N6T3           | 2                    | 6              | 5.9                   | 406    | 44668 | 5.7 | ADP-ribosylation factor GTPase-activating protein 1                                                                                                          |
| 2544 | Q8N6T3-2         | 2                    | 6              | 5.8                   | 414    | 45676 | 5.8 | Isoform 2 of Q8N6T3                                                                                                                                          |
| 2545 | Q53FV3           | 2                    | 4              | 5.9                   | 406    | 46268 | 6.1 | COP9 signalosome subunit 4 variant                                                                                                                           |
| 2545 | Q9BT78           | 2                    | 4              | 5.9                   | 406    | 46269 | 5.8 | COP9 signalosome complex subunit 4                                                                                                                           |
| 2546 | A4D0U6           | 2                    | 5              | 5.8                   | 412    | 46910 | 7.6 | Testis derived transcript                                                                                                                                    |
| 2546 | Q9UGI8           | 2                    | 5              | 5.7                   | 421    | 47996 | 7.7 | Testin                                                                                                                                                       |
| 2547 | Q9NYD2           | 2                    | 3              | 10.8                  | 195    | 21589 | 8.8 | Hepatocellular carcinoma-associated antigen 64                                                                                                               |
| 2547 | Q59E94           | 2                    | 3              | 9.1                   | 232    | 25830 | 7.2 | Peroxisomal D3,D2-enoyl-CoA isomerase isoform 1 variant                                                                                                      |
| 2547 | O75521           | 2                    | 3              | 5.8                   | 359    | 39609 | 8.6 | Peroxisomal 3,2-trans-enoyl-CoA isomerase (EC 5.3.3.8)<br>(Dodecenoyl-CoA isomerase)<br>(Delta(3),delta(2)-enoyl-CoA isomerase)                              |
| 2547 | Q6IBN4           | 2                    | 3              | 5.8                   | 364    | 40193 | 8.8 | PECI protein                                                                                                                                                 |
| 2547 | Q53HG3           | 2                    | 3              | 5.8                   | 364    | 40111 | 8.9 | Peroxisomal D3,D2-enoyl-CoA isomerase isoform 1 variant                                                                                                      |
| 2547 | Q53GC8           | 2                    | 3              | 5.8                   | 364    | 40211 | 8.8 | Peroxisomal D3,D2-enoyl-CoA isomerase isoform 1 variant                                                                                                      |
| 2548 | Q13325           | 2                    | 2              | 5.8                   | 482    | 55847 | 7.4 | Interferon-induced protein with tetratricopeptide repeats 5                                                                                                  |
| 2548 | Q6IAX3           | 2                    | 2              | 5.8                   | 482    | 55874 | 7.4 | IFIT5 protein                                                                                                                                                |
| 2549 | Q6P1J9           | 2                    | 2              | 5.8                   | 531    | 60577 | 9.6 | Parafibromin                                                                                                                                                 |
| 2549 | UPI0000D62067    | 2                    | 2              | 5.8                   | 531    | 60577 | 9.7 | Parafibromin (Cell division cycle protein 73 homolog)<br>(Hyperparathyroidism 2 protein).                                                                    |
| 2550 | Q9UFF2           | 2                    | 2              | 8.4                   | 237    | 25759 | 8.3 | Hypothetical protein<br>DKFZp434L2027                                                                                                                        |
| 2550 | Q9H686           | 2                    | 2              | 5.8                   | 347    | 37754 | 9   | CDNA: FLJ22500 fis, clone<br>HRC11301                                                                                                                        |
| 2550 | Q9NWS9           | 2                    | 2              | 4.4                   | 450    | 48957 | 6.1 | Zinc finger protein 446                                                                                                                                      |
| 2551 | Q9Y6X3-3         | 2                    | 2              | 15.9                  | 189    | 21268 | 6.7 | Isoform 3 of Q9Y6X3                                                                                                                                          |
| 2551 | Q9Y6X3-2         | 2                    | 2              | 13.8                  | 218    | 24654 | 6.7 | Isoform 2 of Q9Y6X3                                                                                                                                          |
| 2551 | Q9Y4B3           | 2                    | 2              | 5.8                   | 514    | 58310 | 6.8 | R29828_1                                                                                                                                                     |
| 2551 | UPI0000456C51    | 2                    | 2              | 5.8                   | 513    | 58097 | 6.8 | K0892_HUMAN Isoform 2 of<br>Q9Y6X3 - Homo sapiens (Human)                                                                                                    |
| 2551 | Q9Y6X3           | 2                    | 2              | 4.9                   | 613    | 69082 | 7.3 | Uncharacterized protein KIAA0892 precursor                                                                                                                   |
| 2552 | UPI00005A6223    | 2                    | 9              | 5.8                   | 394    | 43882 | 5.3 | AP-3 complex subunit sigma-2<br>(Adapter-related protein complex 3 sigma- 2 subunit) (Sigma-adaptin 3b) (AP-3 complex sigma-3B subunit) (Sigma- 3B-adaptin). |
| 2553 | Q5TDC2           | 2                    | 2              | 5.9                   | 357    | 39099 | 7.3 | Mitochondrial carrier homolog 1                                                                                                                              |
| 2553 | UPI0000140C95    | 2                    | 2              | 5.8                   | 362    | 39884 | 8.9 | Mitochondrial carrier homolog 1<br>(Presenilin-associated protein).                                                                                          |
| 2553 | Q9Y374           | 2                    | 2              | 5.8                   | 363    | 40039 | 8.9 | CGI-64 protein                                                                                                                                               |
| 2553 | A4FVA6           | 2                    | 2              | 5.7                   | 370    | 39759 | 9.5 | MTCH1 protein                                                                                                                                                |
| 2553 | Q9NZJ7-2         | 2                    | 2              | 5.6                   | 372    | 39920 | 9.5 | Isoform 2 of Q9NZJ7                                                                                                                                          |
| 2553 | Q9NZJ7           | 2                    | 2              | 5.4                   | 389    | 41544 | 9.3 | Mitochondrial carrier homolog 1                                                                                                                              |

| No.  | Accession Number | Unique Peptide Count | Spectrum Count | Sequence Coverage (%) | Length | MolWt  | pI   | Descriptive Name                                                                                                                                                                                                                             |
|------|------------------|----------------------|----------------|-----------------------|--------|--------|------|----------------------------------------------------------------------------------------------------------------------------------------------------------------------------------------------------------------------------------------------|
| 2553 | UPI0000D6143C    | 2                    | 2              | 5.1                   | 409    | 44618  | 9    | Mitochondrial carrier homolog 1 (Presenilin-associated protein).                                                                                                                                                                             |
| 2553 | Q8IW90           | 2                    | 2              | 5.1                   | 409    | 44619  | 9.1  | MTCH1 protein                                                                                                                                                                                                                                |
| 2554 | Q8NFG7           | 2                    | 5              | 6                     | 318    | 36157  | 9.2  | Alpha 2,3 sialyltransferase IV type A2-12                                                                                                                                                                                                    |
| 2554 | Q11206-3         | 2                    | 5              | 5.9                   | 322    | 36745  | 9.2  | Isoform 3 of Q11206                                                                                                                                                                                                                          |
| 2554 | Q8N6A6           | 2                    | 5              | 5.8                   | 328    | 37228  | 9.2  | Alpha 2,3-sialyltransferase IV type A1-12                                                                                                                                                                                                    |
| 2554 | Q6IBE6           | 2                    | 5              | 5.8                   | 329    | 37458  | 9.4  | SIAT4C protein                                                                                                                                                                                                                               |
| 2554 | Q11206           | 2                    | 5              | 5.7                   | 333    | 38045  | 9.4  | CMP-N-acetylneuraminate-beta-galactosamide-alpha-2,3-sialyltransferase                                                                                                                                                                       |
| 2554 | Q11206-2         | 2                    | 5              | 5.7                   | 332    | 37816  | 9.2  | Isoform 2 of Q11206                                                                                                                                                                                                                          |
| 2554 | UPI00004565A6    | 2                    | 5              | 5.6                   | 339    | 38649  | 9.3  | CMP-N-acetylneuraminate-beta-galactosamide-alpha-2,3-sialyltransferase (EC 2.4.99.-) (Beta-galactoside alpha-2,3-sialyltransferase) (Alpha 2,3-sialyltransferase IV) (Alpha 2,3-ST) (Gal-NAc6S) (STZ) (SIAT4-C) (ST3Gal III) (SAT-3) (ST-4). |
| 2554 | Q8NFD3           | 2                    | 5              | 5.6                   | 338    | 38431  | 9.2  | Alpha-2,3-sialyltransferase IV type A1+18                                                                                                                                                                                                    |
| 2554 | Q11206-4         | 2                    | 5              | 5.6                   | 339    | 38660  | 9.4  | Isoform 4 of Q11206                                                                                                                                                                                                                          |
| 2554 | UPI000013CA87    | 2                    | 5              | 5.3                   | 356    | 40914  | 9.4  | CMP-N-acetylneuraminate-beta-galactosamide-alpha-2,3-sialyltransferase (EC 2.4.99.-) (Beta-galactoside alpha-2,3-sialyltransferase) (Alpha 2,3-sialyltransferase IV) (Alpha 2,3-ST) (Gal-NAc6S) (STZ) (SIAT4-C) (ST3Gal III) (SAT-3) (ST-4). |
| 2554 | Q9HAA9           | 2                    | 5              | 5.3                   | 356    | 40930  | 9.4  | CDNA FLJ11867 fis, clone HEMBA1006976, weakly similar to H.sapiens Gal-beta(1-3/1-4)GlcNAc alpha-2.3-sialyltransferase                                                                                                                       |
| 2555 | Q14376           | 2                    | 5              | 5.7                   | 348    | 38282  | 6.7  | UDP-glucose 4-epimerase                                                                                                                                                                                                                      |
| 2556 | Q15035           | 2                    | 4              | 5.7                   | 370    | 43328  | 9.2  | Translocation-associated membrane protein 2                                                                                                                                                                                                  |
| 2557 | Q9NUM4           | 2                    | 9              | 6.6                   | 274    | 31127  | 7    | Transmembrane protein 106B                                                                                                                                                                                                                   |
| 2557 | Q8N353           | 2                    | 9              | 5.7                   | 314    | 35137  | 8.2  | TMEM106B protein                                                                                                                                                                                                                             |
| 2558 | Q9H3P7           | 2                    | 2              | 5.7                   | 528    | 60593  | 5.1  | Golgi resident protein GCP60                                                                                                                                                                                                                 |
| 2559 | O95905           | 2                    | 4              | 5.6                   | 644    | 72758  | 4.9  | SGT1 protein                                                                                                                                                                                                                                 |
| 2559 | Q6I9U8           | 2                    | 4              | 5.6                   | 644    | 72710  | 4.9  | HSGT1 protein                                                                                                                                                                                                                                |
| 2560 | Q658J0           | 2                    | 3              | 6.3                   | 332    | 37029  | 6.5  | Hypothetical protein DKFZp762L015                                                                                                                                                                                                            |
| 2560 | Q9GZT8           | 2                    | 3              | 6                     | 350    | 38984  | 6.4  | NIF3-like protein 1                                                                                                                                                                                                                          |
| 2560 | Q53TX4           | 2                    | 3              | 5.6                   | 377    | 41968  | 6.7  | Hypothetical protein NIF3L1                                                                                                                                                                                                                  |
| 2561 | Q9BT22           | 2                    | 4              | 5.6                   | 464    | 52518  | 7.2  | Chitobiosyldiphosphodolichol beta-mannosyltransferase                                                                                                                                                                                        |
| 2562 | Q9Y4G6           | 2                    | 4              | 5.6                   | 2542   | 271553 | 5.6  | Talin-2                                                                                                                                                                                                                                      |
| 2562 | UPI0000D6134E    | 2                    | 4              | 5.6                   | 2544   | 271795 | 5.6  | Talin-2.                                                                                                                                                                                                                                     |
| 2562 | UPI00001FE5FC    | 2                    | 4              | 5.6                   | 2542   | 271611 | 5.6  | Talin-2.                                                                                                                                                                                                                                     |
| 2563 | UPI0000DD81F6    | 2                    | 3              | 5.6                   | 378    | 38876  | 10.5 | PREDICTED: similar to coiled-coil domain containing 86                                                                                                                                                                                       |
| 2564 | O60678           | 2                    | 5              | 5.5                   | 531    | 59903  | 5.3  | Protein arginine N-methyltransferase 3                                                                                                                                                                                                       |

| No.  | Accession Number | Unique Peptide Count | Spectrum Count | Sequence Coverage (%) | Length | MolWt | pI  | Descriptive Name                                                                                                                |
|------|------------------|----------------------|----------------|-----------------------|--------|-------|-----|---------------------------------------------------------------------------------------------------------------------------------|
| 2564 | UPI0000198DED    | 2                    | 5              | 5.5                   | 531    | 59876 | 5.3 | Protein arginine N-methyltransferase 3 (EC 2.1.1.-) (Heterogeneous nuclear ribonucleoprotein methyltransferase-like protein 3). |
| 2564 | UPI00001AFD06    | 2                    | 5              | 5.3                   | 548    | 61841 | 7.3 | Protein arginine N-methyltransferase 3 (EC 2.1.1.-) (Heterogeneous nuclear ribonucleoprotein methyltransferase-like protein 3). |
| 2564 | Q8WUV3           | 2                    | 5              | 5.3                   | 548    | 61967 | 7.4 | PRMT3 protein                                                                                                                   |
| 2565 | Q13685           | 2                    | 2              | 5.5                   | 434    | 46751 | 4.4 | Angio-associated migratory cell protein                                                                                         |
| 2566 | UPI0000074015    | 2                    | 2              | 5.6                   | 359    | 39303 | 5.2 | hsp70-interacting protein                                                                                                       |
| 2566 | Q9NZL4           | 2                    | 2              | 5.5                   | 362    | 39474 | 5.2 | Hsp70-binding protein 1                                                                                                         |
| 2567 | P41236           | 2                    | 3              | 5.4                   | 205    | 23015 | 4.7 | Protein phosphatase inhibitor 2                                                                                                 |
| 2567 | UPI000013EC9E    | 2                    | 3              | 5.4                   | 205    | 23106 | 4.9 | protein phosphatase 1, regulatory (inhibitor) subunit 2 pseudogene 3 (PPP1R2P3) on chromosome 5                                 |
| 2567 | Q6NXS1           | 2                    | 3              | 5.4                   | 205    | 23048 | 4.9 | PPP1R2P3 protein                                                                                                                |
| 2568 | Q14318           | 2                    | 3              | 5.4                   | 355    | 38408 | 7.7 | FK506-binding protein 8                                                                                                         |
| 2568 | Q53GU3           | 2                    | 3              | 5.1                   | 372    | 40464 | 5.7 | FK506-binding protein 8 variant                                                                                                 |
| 2568 | UPI000020376E    | 2                    | 3              | 4.6                   | 413    | 44649 | 4.8 | FK506-binding protein 8                                                                                                         |
| 2568 | Q86YK6           | 2                    | 3              | 4.6                   | 412    | 44562 | 4.8 | FK506-binding protein 38                                                                                                        |
| 2568 | Q7Z349           | 2                    | 3              | 4.2                   | 451    | 48636 | 5   | Hypothetical protein DKFZp686M22160                                                                                             |
| 2569 | Q53FA7           | 2                    | 2              | 5.4                   | 332    | 35536 | 7.2 | Putative quinone oxidoreductase                                                                                                 |
| 2570 | UPI0000D61A38    | 2                    | 2              | 5.4                   | 316    | 33124 | 7.2 | procollagen (type III) N-endopeptidase (PCOLN3), mRNA                                                                           |
| 2571 | Q59EJ1           | 2                    | 6              | 10.3                  | 185    | 21279 | 9.3 | Etoposide-induced protein 2.4 variant                                                                                           |
| 2571 | UPI0000D6269D    | 2                    | 6              | 7.3                   | 261    | 29994 | 9.7 | Etoposide-induced protein 2.4 (p53-induced protein 8).                                                                          |
| 2571 | UPI00004703AE    | 2                    | 6              | 7.3                   | 262    | 30107 | 9.7 | etoposide induced 2.4 isoform 2                                                                                                 |
| 2571 | Q9BUQ1           | 2                    | 6              | 5.6                   | 340    | 38965 | 9.7 | Etoposide induced 2.4 mRNA                                                                                                      |
| 2571 | O14681           | 2                    | 6              | 5.3                   | 359    | 40979 | 9.5 | Etoposide-induced protein 2.4                                                                                                   |
| 2571 | UPI0000140B73    | 2                    | 6              | 5.3                   | 356    | 40694 | 9.4 | Etoposide-induced protein 2.4 (p53-induced protein 8).                                                                          |
| 2572 | O95219           | 2                    | 4              | 5.3                   | 450    | 51909 | 6   | Sorting nexin-4                                                                                                                 |
| 2573 | P36551           | 2                    | 3              | 5.3                   | 454    | 50152 | 8.3 | Coproporphyrinogen III oxidase, mitochondrial precursor                                                                         |
| 2573 | Q53F08           | 2                    | 3              | 5.3                   | 454    | 50166 | 8.3 | Coproporphyrinogen oxidase variant                                                                                              |
| 2574 | Q10713           | 2                    | 8              | 5.3                   | 525    | 58253 | 6.9 | Mitochondrial-processing peptidase alpha subunit, mitochondrial precursor                                                       |
| 2575 | Q86VS8           | 2                    | 6              | 5.3                   | 718    | 83126 | 5.2 | Hook homolog 3                                                                                                                  |
| 2576 | Q96NA3           | 2                    | 5              | 5.3                   | 434    | 48705 | 8.9 | CDNA FLJ31187 fis, clone KIDNE2000349, moderately similar to Mus musculus putative lysophosphatidic acid acyltransferase mRNA   |
| 2577 | Q9NXG7           | 2                    | 21             | 5.3                   | 525    | 55145 | 4.9 | CDNA FLJ20261 fis, clone COLF7630                                                                                               |
| 2578 | O43670-2         | 2                    | 9              | 5.4                   | 463    | 49692 | 9.1 | Isoform 2 of O43670                                                                                                             |
| 2578 | O43670           | 2                    | 9              | 5.2                   | 478    | 50751 | 9.1 | Zinc finger protein 207                                                                                                         |
| 2578 | Q59G94           | 2                    | 9              | 5                     | 496    | 52856 | 9   | Zinc finger protein 207 variant                                                                                                 |

| No.  | Accession Number | Unique Peptide Count | Spectrum Count | Sequence Coverage (%) | Length | MolWt | pI  | Descriptive Name                                                                                                                 |
|------|------------------|----------------------|----------------|-----------------------|--------|-------|-----|----------------------------------------------------------------------------------------------------------------------------------|
| 2579 | Q16850           | 2                    | 11             | 5.2                   | 503    | 56806 | 8.5 | Cytochrome P450 51A1                                                                                                             |
| 2580 | Q8IWE2           | 2                    | 4              | 5.2                   | 563    | 60825 | 4.7 | Protein NOXP20                                                                                                                   |
| 2580 | UPI00001DFE17    | 2                    | 4              | 5.2                   | 563    | 60742 | 4.7 | family with sequence similarity 114, member A1 (FAM114A1), mRNA                                                                  |
| 2581 | Q9HCC0-2         | 2                    | 2              | 5.5                   | 525    | 57519 | 7.7 | Isoform 2 of Q9HCC0                                                                                                              |
| 2581 | Q9HCC0           | 2                    | 2              | 5.2                   | 563    | 61333 | 7.7 | Methylcrotonoyl-CoA carboxylase beta chain, mitochondrial precursor                                                              |
| 2582 | Q96HS5           | 2                    | 4              | 11.2                  | 179    | 21021 | 7.9 | PSCD3 protein                                                                                                                    |
| 2582 | Q75MW6           | 2                    | 4              | 5.2                   | 387    | 45231 | 5.9 | Hypothetical protein PSCD3                                                                                                       |
| 2582 | A4D2N8           | 2                    | 4              | 5                     | 399    | 46292 | 5.5 | Pleckstrin homology, Sec7 and coiled-coil domains 3                                                                              |
| 2582 | O43739           | 2                    | 4              | 5                     | 400    | 46349 | 5.5 | Cytohesin-3                                                                                                                      |
| 2583 | Q8N1G4           | 2                    | 8              | 5                     | 583    | 63473 | 8.3 | Leucine-rich repeat-containing protein 47                                                                                        |
| 2584 | Q8NBN3-3         | 2                    | 3              | 5.7                   | 494    | 56774 | 5.7 | Isoform 3 of Q8NBN3                                                                                                              |
| 2584 | Q8NBN3           | 2                    | 3              | 5                     | 555    | 63430 | 6.7 | Transmembrane protein 87A precursor                                                                                              |
| 2584 | UPI000045682C    | 2                    | 3              | 5                     | 562    | 64144 | 7   | Transmembrane protein 87A precursor.                                                                                             |
| 2585 | UPI0000D625C4    | 2                    | 5              | 7.6                   | 342    | 38322 | 8.3 | Fatty acyl-CoA reductase 1 (EC 1.2.1.-) (Male sterility domain-containing protein 2).                                            |
| 2585 | Q9H600           | 2                    | 5              | 7.6                   | 342    | 38379 | 8.8 | CDNA: FLJ22728 fis, clone HSI15617                                                                                               |
| 2585 | Q8WVX9           | 2                    | 5              | 5                     | 515    | 59357 | 9.2 | Fatty acyl-CoA reductase 1                                                                                                       |
| 2585 | UPI0000D625C5    | 2                    | 5              | 5                     | 518    | 59629 | 9.2 | Fatty acyl-CoA reductase 1 (EC 1.2.1.-) (Male sterility domain-containing protein 2).                                            |
| 2586 | Q92685           | 2                    | 7              | 5                     | 438    | 50126 | 9.4 | Dolichyl-P-Man:Man(5)GlcNAc(2)-PP-dolichyl mannosyltransferase (EC 2.4.1.-) (Dol-P-Man-dependent alpha(1-3)-mannosyltransferase) |
| 2587 | Q9H936           | 2                    | 3              | 5                     | 323    | 34470 | 9.3 | Mitochondrial glutamate carrier 1 (GC-1) (Glutamate/H(+) symporter 1)                                                            |
| 2588 | Q9UHY1           | 2                    | 2              | 5                     | 535    | 59845 | 5.1 | Nuclear receptor-binding protein                                                                                                 |
| 2589 | P53990-2         | 2                    | 7              | 5.4                   | 335    | 36622 | 5.4 | Isoform 2 of P53990                                                                                                              |
| 2589 | P53990-3         | 2                    | 7              | 5                     | 360    | 39928 | 7.8 | Isoform 3 of P53990                                                                                                              |
| 2589 | P53990           | 2                    | 7              | 4.9                   | 364    | 39751 | 5.3 | Uncharacterized protein KIAA0174                                                                                                 |
| 2589 | Q3SYM4           | 2                    | 7              | 4.9                   | 366    | 39979 | 5.3 | KIAA0174 protein                                                                                                                 |
| 2590 | Q5J8M4           | 2                    | 7              | 5.1                   | 352    | 39479 | 7.8 | Migration-inducing gene 14                                                                                                       |
| 2590 | P78406           | 2                    | 7              | 4.9                   | 368    | 40968 | 7.8 | mRNA-associated protein mrnp 41                                                                                                  |
| 2591 | Q969G3-2         | 2                    | 5              | 5.5                   | 363    | 41780 | 6   | Isoform 2 of Q969G3                                                                                                              |
| 2591 | Q969G3           | 2                    | 5              | 4.9                   | 411    | 46649 | 4.9 | SWI/SNF-related matrix-associated actin-dependent regulator of chromatin subfamily E member 1                                    |
| 2592 | Q9BQ39           | 2                    | 3              | 4.9                   | 737    | 82565 | 9.2 | ATP-dependent RNA helicase DDX50                                                                                                 |
| 2593 | Q9NRX5           | 2                    | 6              | 4.9                   | 453    | 50495 | 5.8 | Serine incorporator 1                                                                                                            |
| 2594 | O94919           | 2                    | 5              | 4.8                   | 500    | 55017 | 5.7 | Endonuclease domain-containing 1 protein precursor                                                                               |
| 2595 | Q4G0D9           | 2                    | 2              | 6.3                   | 567    | 64081 | 9.3 | BOP1 protein                                                                                                                     |
| 2595 | Q14137           | 2                    | 2              | 4.8                   | 746    | 83630 | 6.2 | Ribosome biogenesis protein BOP1                                                                                                 |
| 2596 | Q86YF0           | 2                    | 3              | 4.8                   | 481    | 50803 | 8.3 | ALDH16A1 protein                                                                                                                 |

| No.  | Accession Number | Unique Peptide Count | Spectrum Count | Sequence Coverage (%) | Length | MolWt  | pI  | Descriptive Name                                                                                                            |
|------|------------------|----------------------|----------------|-----------------------|--------|--------|-----|-----------------------------------------------------------------------------------------------------------------------------|
| 2596 | UPI000013E0FF    | 2                    | 3              | 2.9                   | 802    | 85127  | 6.8 | aldehyde dehydrogenase 16 family, member A1                                                                                 |
| 2596 | Q8IZ83           | 2                    | 3              | 2.9                   | 802    | 85113  | 6.8 | Aldehyde dehydrogenase family 16 member A1                                                                                  |
| 2597 | Q8NCH0           | 2                    | 4              | 4.8                   | 376    | 42997  | 9.5 | Carbohydrate sulfotransferase D4ST1                                                                                         |
| 2598 | Q8WX92           | 2                    | 2              | 4.8                   | 580    | 65697  | 6.1 | Negative elongation factor B                                                                                                |
| 2599 | Q9H173           | 2                    | 5              | 4.8                   | 461    | 52085  | 5.4 | Nucleotide exchange factor SIL1 precursor                                                                                   |
| 2600 | Q9H490-2         | 2                    | 3              | 5.1                   | 415    | 47611  | 8.2 | Isoform 2 of Q9H490                                                                                                         |
| 2600 | Q9H490           | 2                    | 3              | 4.8                   | 435    | 50052  | 7.7 | GPI transamidase component PIG-U                                                                                            |
| 2601 | Q9HA77           | 2                    | 8              | 4.8                   | 564    | 62224  | 8.3 | Probable cysteinyl-tRNA synthetase, mitochondrial precursor                                                                 |
| 2602 | Q9NYB0           | 2                    | 4              | 4.8                   | 399    | 44260  | 4.7 | Telomeric repeat-binding factor 2-interacting protein 1                                                                     |
| 2603 | Q9UJW0           | 2                    | 3              | 4.8                   | 460    | 52337  | 7.3 | Dynactin subunit 4                                                                                                          |
| 2604 | A2VDI4           | 2                    | 12             | 4.7                   | 674    | 76138  | 6.5 | KIAA0143 protein                                                                                                            |
| 2604 | UPI000041A085    | 2                    | 12             | 4.1                   | 785    | 88802  | 6.5 | hypothetical protein LOC23167                                                                                               |
| 2604 | Q14156-3         | 2                    | 12             | 4.1                   | 777    | 87580  | 6.6 | Isoform 3 of Q14156                                                                                                         |
| 2604 | Q14156           | 2                    | 12             | 3.9                   | 821    | 92924  | 6.7 | Protein EFR3-like                                                                                                           |
| 2605 | Q05D48           | 2                    | 6              | 5.4                   | 771    | 87140  | 5.1 | Hypothetical protein                                                                                                        |
| 2605 | O14787           | 2                    | 6              | 4.7                   | 897    | 101387 | 5   | Transportin-2                                                                                                               |
| 2605 | UPI000013F0EA    | 2                    | 6              | 4.7                   | 897    | 101388 | 5   | Transportin-2 (Karyopherin beta-2b).                                                                                        |
| 2605 | Q6IN77           | 2                    | 6              | 4.7                   | 887    | 100408 | 5   | Transportin 2                                                                                                               |
| 2605 | O14787-2         | 2                    | 6              | 4.7                   | 887    | 100403 | 5   | Isoform 2 of O14787                                                                                                         |
| 2605 | Q4LE60           | 2                    | 6              | 4                     | 1051   | 117677 | 5.6 | TNPO2 variant protein                                                                                                       |
| 2606 | UPI000013CA9C    | 2                    | 5              | 5.2                   | 481    | 52839  | 5.8 | solute carrier family 39 (zinc transporter), member 14                                                                      |
| 2606 | Q96BB3           | 2                    | 5              | 5.2                   | 481    | 52823  | 5.8 | SLC39A14 protein                                                                                                            |
| 2606 | UPI0000457680    | 2                    | 5              | 5.1                   | 492    | 54057  | 5.1 | solute carrier family 39 (zinc transporter), member 14                                                                      |
| 2606 | Q15043           | 2                    | 5              | 4.7                   | 531    | 58417  | 5.4 | Solute carrier family 39 member 14                                                                                          |
| 2607 | Q8IXH7-4         | 2                    | 2              | 4.8                   | 581    | 65479  | 5.1 | Isoform NELF                                                                                                                |
| 2607 | Q8IXH7           | 2                    | 2              | 4.7                   | 590    | 66247  | 5.1 | Negative elongation factor C/D                                                                                              |
| 2608 | O00186           | 2                    | 7              | 4.6                   | 592    | 67574  | 8   | Syntaxin-binding protein 3                                                                                                  |
| 2608 | Q5VTL6           | 2                    | 7              | 4.6                   | 592    | 67764  | 7.8 | Syntaxin binding protein 3                                                                                                  |
| 2608 | Q53FW1           | 2                    | 7              | 4.6                   | 592    | 67730  | 7.8 | Syntaxin binding protein 3 variant                                                                                          |
| 2609 | O75525-2         | 2                    | 2              | 5.9                   | 271    | 30250  | 9.5 | Isoform 2 of O75525                                                                                                         |
| 2609 | O75525           | 2                    | 2              | 4.6                   | 346    | 38800  | 7.6 | KH domain-containing, RNA-binding, signal transduction-associated protein 3                                                 |
| 2610 | O95470           | 2                    | 2              | 4.6                   | 568    | 63524  | 9.2 | Sphingosine-1-phosphate lyase 1                                                                                             |
| 2611 | P37198           | 2                    | 11             | 4.6                   | 522    | 53255  | 5.3 | Nuclear pore glycoprotein p62                                                                                               |
| 2612 | P56182           | 2                    | 4              | 4.6                   | 461    | 52839  | 9.3 | RRP1-like protein                                                                                                           |
| 2612 | UPI000013E05F    | 2                    | 4              | 4.6                   | 461    | 52942  | 9.4 | NNP-1 protein (Novel nuclear protein 1) (Nucleolar protein Nop52) (D21S2056E).                                              |
| 2612 | Q53FR7           | 2                    | 4              | 4.6                   | 461    | 52853  | 9.4 | Nucleolar protein NOP52 variant                                                                                             |
| 2612 | Q6PJJ2           | 2                    | 4              | 4.5                   | 466    | 53413  | 9.5 | D21S2056E protein                                                                                                           |
| 2613 | Q05CS9           | 2                    | 3              | 4.6                   | 632    | 69119  | 9.2 | Hypothetical protein                                                                                                        |
| 2614 | UPI000000CBC7    | 2                    | 4              | 4.8                   | 419    | 46663  | 9.2 | Inner membrane protein OXA1L, mitochondrial precursor (Oxidase assembly 1-like protein) (OXA1-like protein) (OXA1Hs) (Hsa). |
| 2614 | Q15070-2         | 2                    | 4              | 4.8                   | 419    | 46692  | 9.2 | Isoform 2 of Q15070                                                                                                         |

| No.  | Accession Number | Unique Peptide Count | Spectrum Count | Sequence Coverage (%) | Length | MolWt | pI  | Descriptive Name                                                                                                            |
|------|------------------|----------------------|----------------|-----------------------|--------|-------|-----|-----------------------------------------------------------------------------------------------------------------------------|
| 2614 | Q15070           | 2                    | 4              | 4.6                   | 435    | 48548 | 9.4 | Inner membrane protein OXA1L, mitochondrial precursor                                                                       |
| 2614 | UPI000013DE11    | 2                    | 4              | 4                     | 495    | 55270 | 9.7 | Inner membrane protein OXA1L, mitochondrial precursor (Oxidase assembly 1-like protein) (OXA1-like protein) (OXA1Hs) (Hsa). |
| 2614 | UPI0000130F58    | 2                    | 4              | 4                     | 495    | 55298 | 9.7 | oxidase (cytochrome c) assembly 1-like                                                                                      |
| 2614 | Q2M1J6           | 2                    | 4              | 4                     | 496    | 55385 | 9.7 | Oxidase (Cytochrome c) assembly 1-like                                                                                      |
| 2615 | Q5T8B5           | 2                    | 4              | 4.6                   | 571    | 59481 | 8.6 | Interferon regulatory factor 2 binding protein 2                                                                            |
| 2615 | Q5T8B6           | 2                    | 4              | 4.4                   | 587    | 61025 | 8.7 | Interferon regulatory factor 2-binding protein 2                                                                            |
| 2616 | Q6PJG6           | 2                    | 2              | 4.6                   | 821    | 88119 | 5.3 | HEAT repeat domain-containing protein C7orf27 precursor                                                                     |
| 2616 | UPI0000001C11    | 2                    | 2              | 4.6                   | 821    | 88020 | 5.2 | hypothetical protein LOC221927                                                                                              |
| 2617 | Q9UH65           | 2                    | 3              | 4.6                   | 585    | 68998 | 5.9 | Switch-associated protein 70                                                                                                |
| 2618 | Q86TN5           | 2                    | 8              | 4.7                   | 676    | 78276 | 7.8 | Similar to Origin recognition complex subunit 3                                                                             |
| 2618 | A2A2T5           | 2                    | 8              | 4.5                   | 712    | 82325 | 7.6 | Origin recognition complex, subunit 3-like                                                                                  |
| 2618 | Q9UBD5           | 2                    | 8              | 4.5                   | 711    | 82254 | 7.6 | Origin recognition complex subunit 3                                                                                        |
| 2618 | Q53GY6           | 2                    | 8              | 4.5                   | 711    | 82332 | 7.6 | Origin recognition complex, subunit 3 isoform 2 variant                                                                     |
| 2619 | Q8IWA4-2         | 2                    | 3              | 5.4                   | 370    | 41883 | 6.4 | Isoform 2 of Q8IWA4                                                                                                         |
| 2619 | Q05CV7           | 2                    | 3              | 4.5                   | 447    | 50948 | 6.6 | Hypothetical protein                                                                                                        |
| 2619 | Q8IWA4-3         | 2                    | 3              | 3.2                   | 630    | 71401 | 6.3 | Isoform 3 of Q8IWA4                                                                                                         |
| 2619 | UPI000013D495    | 2                    | 3              | 2.7                   | 741    | 84100 | 6.3 | Mitofusin-1 (EC 3.6.5.-) (Transmembrane GTPase MFN1) (Fzo homolog).                                                         |
| 2619 | Q8IWA4           | 2                    | 3              | 2.7                   | 741    | 84159 | 6.3 | Mitofusin-1                                                                                                                 |
| 2619 | Q4AEJ4           | 2                    | 3              | 2.6                   | 769    | 86994 | 6.4 | Mitochondrial transmembrane GTPase FZO-2                                                                                    |
| 2620 | Q9ULA6           | 2                    | 3              | 8.4                   | 287    | 33463 | 9.3 | Homo sapiens chromosome 14 BAC containing genes for ABH and nuclear receptor coactivator NCoA-62, complete sequence         |
| 2620 | Q13573           | 2                    | 3              | 4.5                   | 536    | 61495 | 9.5 | SNW domain-containing protein 1                                                                                             |
| 2620 | Q6I9S2           | 2                    | 3              | 4.5                   | 536    | 61449 | 9.5 | SNW1 protein                                                                                                                |
| 2621 | Q308M8           | 2                    | 3              | 4.5                   | 494    | 52937 | 4.9 | RAN binding protein 3 transcript variant a                                                                                  |
| 2621 | UPI00001619DB    | 2                    | 3              | 4.4                   | 499    | 53481 | 4.8 | RAN binding protein 3 isoform RANBP3-b                                                                                      |
| 2621 | Q9H6Z4-3         | 2                    | 3              | 4.4                   | 499    | 53411 | 4.8 | Isoform 3 of Q9H6Z4                                                                                                         |
| 2621 | UPI00001AE593    | 2                    | 3              | 3.9                   | 560    | 59465 | 4.8 | Ran-binding protein 3 (RanBP3).                                                                                             |
| 2621 | UPI000006EF22    | 2                    | 3              | 3.9                   | 562    | 59622 | 4.8 | RAN binding protein 3 isoform RANBP3-a                                                                                      |
| 2621 | Q9H6Z4-2         | 2                    | 3              | 3.9                   | 562    | 59694 | 4.8 | Isoform 2 of Q9H6Z4                                                                                                         |
| 2621 | Q9H6Z4           | 2                    | 3              | 3.9                   | 567    | 60210 | 4.8 | Ran-binding protein 3                                                                                                       |
| 2622 | UPI00000622B6    | 2                    | 6              | 5.6                   | 665    | 75579 | 5.5 | armadillo repeat containing 9                                                                                               |
| 2622 | Q7Z3E5           | 2                    | 6              | 4.5                   | 817    | 91762 | 6.2 | LisH domain-containing protein ARMC9                                                                                        |
| 2623 | Q9UNS2           | 2                    | 9              | 4.5                   | 423    | 47873 | 6.7 | COP9 signalosome complex subunit 3                                                                                          |
| 2624 | O75168           | 2                    | 6              | 4.4                   | 844    | 92602 | 6   | TEL2 homolog                                                                                                                |

| No.  | Accession Number | Unique Peptide Count | Spectrum Count | Sequence Coverage (%) | Length | MolWt  | pI   | Descriptive Name                                               |
|------|------------------|----------------------|----------------|-----------------------|--------|--------|------|----------------------------------------------------------------|
| 2624 | Q9Y4R8           | 2                    | 6              | 4.4                   | 837    | 91775  | 5.8  | Hypothetical protein DKFZp434A073                              |
| 2624 | Q7LDV4           | 2                    | 6              | 4.4                   | 837    | 91747  | 5.8  | KIAA0683                                                       |
| 2625 | P35813-2         | 2                    | 2              | 6.5                   | 324    | 35958  | 5.8  | Isoform Alpha                                                  |
| 2625 | Q4J6C2           | 2                    | 2              | 6.4                   | 327    | 36313  | 5.5  | PPM1B beta isoform variant 4                                   |
| 2625 | Q4J6C1           | 2                    | 2              | 5.5                   | 380    | 42086  | 5.4  | PPM1B beta isoform variant 5                                   |
| 2625 | P35813           | 2                    | 2              | 5.5                   | 382    | 42448  | 5.4  | Protein phosphatase 2C isoform alpha                           |
| 2625 | Q461Q2           | 2                    | 2              | 5.4                   | 387    | 42771  | 5.2  | PPM1B beta isoform variant 2                                   |
| 2625 | UPI0000D61192    | 2                    | 2              | 4.9                   | 431    | 47769  | 6    | Protein phosphatase 2C isoform beta (EC 3.1.3.16) (PP2C-beta). |
| 2625 | Q4J6C0           | 2                    | 2              | 4.9                   | 431    | 47810  | 6.1  | PPM1B beta isoform variant 6                                   |
| 2625 | O75688           | 2                    | 2              | 4.4                   | 479    | 52643  | 5    | Protein phosphatase 2C isoform beta                            |
| 2626 | UPI0000246FF6    | 2                    | 3              | 6.5                   | 417    | 47287  | 6.3  | Serum albumin precursor.                                       |
| 2626 | P02768-2         | 2                    | 3              | 6.5                   | 417    | 47361  | 6.3  | Isoform 2 of P02768                                            |
| 2626 | P02768           | 2                    | 3              | 4.4                   | 609    | 69367  | 6.3  | Serum albumin precursor                                        |
| 2626 | Q56G89           | 2                    | 3              | 4.4                   | 609    | 69084  | 6.2  | Serum albumin                                                  |
| 2626 | UPI0000D61578    | 2                    | 3              | 4.3                   | 626    | 71576  | 6.7  | Serum albumin precursor.                                       |
| 2627 | P31749           | 2                    | 2              | 4.4                   | 480    | 55686  | 6.1  | RAC-alpha serine/threonine-protein kinase                      |
| 2628 | Q86X55           | 2                    | 5              | 4.4                   | 585    | 63460  | 6.6  | Histone-arginine methyltransferase CARM1                       |
| 2628 | UPI000004B825    | 2                    | 5              | 4.3                   | 608    | 65854  | 6.7  | coactivator-associated arginine methyltransferase 1            |
| 2629 | Q9H174           | 2                    | 2              | 4.5                   | 493    | 55040  | 8.1  | Alanine:glyoxylate aminotransferase 2 homolog 1, splice form 1 |
| 2629 | Q8TBG4           | 2                    | 2              | 4.4                   | 499    | 55671  | 8.1  | Alanine-glyoxylate aminotransferase 2-like protein 1           |
| 2630 | UPI00000372F2    | 2                    | 2              | 5.6                   | 514    | 58604  | 6.2  | WD repeat domain 26                                            |
| 2630 | Q9H7D7-2         | 2                    | 2              | 4.5                   | 645    | 70460  | 6.2  | Isoform 2 of Q9H7D7                                            |
| 2630 | Q9H7D7           | 2                    | 2              | 4.4                   | 661    | 72124  | 6.2  | WD repeat protein 26                                           |
| 2631 | A1A693           | 2                    | 3              | 4.3                   | 913    | 99578  | 9.9  | RNA binding motif protein 15 isoform L2                        |
| 2631 | Q96T37-2         | 2                    | 3              | 4.1                   | 957    | 104755 | 10.1 | Isoform 2 of Q96T37                                            |
| 2631 | Q86VW9           | 2                    | 3              | 4.1                   | 959    | 105284 | 10.1 | RBM15 protein                                                  |
| 2631 | Q96T37           | 2                    | 3              | 4                     | 977    | 107188 | 10.1 | Putative RNA-binding protein 15                                |
| 2631 | Q4V760           | 2                    | 3              | 4                     | 969    | 106366 | 10.1 | RBM15 protein                                                  |
| 2631 | Q3ZB86           | 2                    | 3              | 4                     | 969    | 106365 | 10.1 | RBM15 protein                                                  |
| 2632 | Q5TBH8           | 2                    | 5              | 4.9                   | 587    | 67046  | 6.3  | Glyceronephosphate O-acyltransferase                           |
| 2632 | O15228           | 2                    | 5              | 4.3                   | 680    | 77188  | 6.6  | Dihydroxyacetone phosphate acyltransferase                     |
| 2632 | Q53H08           | 2                    | 5              | 4.3                   | 680    | 77162  | 6.6  | Glyceronephosphate O-acyltransferase variant                   |
| 2632 | Q53F12           | 2                    | 5              | 4.3                   | 680    | 77089  | 6.4  | Glyceronephosphate O-acyltransferase variant                   |
| 2633 | Q59H76           | 2                    | 10             | 4.3                   | 627    | 72827  | 6.2  | Leucyl/cystinyl aminopeptidase variant                         |
| 2633 | Q9UIQ6           | 2                    | 10             | 2.6                   | 1025   | 117349 | 5.7  | Leucyl-cystinyl aminopeptidase                                 |
| 2634 | Q9NRV2           | 2                    | 2              | 6.2                   | 273    | 31841  | 8.9  | X 010 protein                                                  |
| 2634 | Q8NBL1           | 2                    | 2              | 4.3                   | 392    | 46189  | 8.7  | KTEL motif-containing protein 1 precursor                      |
| 2634 | UPI0000073BBD    | 2                    | 2              | 4.3                   | 392    | 46221  | 8.7  | chromosome 3 open reading frame 9                              |

| No.  | Accession Number | Unique Peptide Count | Spectrum Count | Sequence Coverage (%) | Length | MolWt  | pI  | Descriptive Name                                                                                                                                                                                                   |
|------|------------------|----------------------|----------------|-----------------------|--------|--------|-----|--------------------------------------------------------------------------------------------------------------------------------------------------------------------------------------------------------------------|
| 2635 | UPI000046FEE5    | 2                    | 5              | 4.4                   | 571    | 65202  | 5.2 | Optineurin (Optic neuropathy-inducing protein) (E3-14.7K-interacting protein) (FIP-2) (Huntingtin-interacting protein HYPL) (NEMO-related protein) (Transcription factor IIIA-interacting protein) (TFIIIA- IntP). |
| 2635 | Q96CV9-2         | 2                    | 5              | 4.4                   | 571    | 65203  | 5.1 | Isoform 2 of Q96CV9                                                                                                                                                                                                |
| 2635 | Q96CV9           | 2                    | 5              | 4.3                   | 577    | 65922  | 5.2 | Optineurin                                                                                                                                                                                                         |
| 2635 | UPI000013D38D    | 2                    | 5              | 4.3                   | 577    | 65921  | 5.2 | Optineurin (Optic neuropathy-inducing protein) (E3-14.7K-interacting protein) (FIP-2) (Huntingtin-interacting protein HYPL) (NEMO-related protein) (Transcription factor IIIA-interacting protein) (TFIIIA- IntP). |
| 2636 | A2CEE0           | 2                    | 5              | 4.2                   | 698    | 77529  | 7.7 | Quiescin Q6-like 1                                                                                                                                                                                                 |
| 2636 | UPI0000D6194B    | 2                    | 5              | 4.2                   | 698    | 77420  | 7.4 | Sulfhydryl oxidase 2 precursor (EC 1.8.3.2) (Quiescin Q6-like protein 1) (Neuroblastoma-derived sulfhydryl oxidase).                                                                                               |
| 2636 | Q6ZRP7           | 2                    | 5              | 4.2                   | 698    | 77543  | 7.7 | Sulfhydryl oxidase 2 precursor                                                                                                                                                                                     |
| 2636 | UPI0000D6194A    | 2                    | 5              | 4.1                   | 700    | 77756  | 7.7 | Sulfhydryl oxidase 2 precursor (EC 1.8.3.2) (Quiescin Q6-like protein 1) (Neuroblastoma-derived sulfhydryl oxidase).                                                                                               |
| 2637 | A4D2L3           | 2                    | 3              | 4.2                   | 521    | 58443  | 7   | Transforming growth factor beta regulator 4                                                                                                                                                                        |
| 2637 | Q969Z0           | 2                    | 3              | 3.5                   | 631    | 70738  | 7.4 | Protein TBRG4                                                                                                                                                                                                      |
| 2638 | O00592           | 2                    | 2              | 4.2                   | 528    | 55596  | 5.6 | Podocalyxin-like protein 1 precursor                                                                                                                                                                               |
| 2638 | UPI0000D61CD8    | 2                    | 2              | 4.2                   | 526    | 55347  | 5.7 | Podocalyxin-like protein 1 precursor.                                                                                                                                                                              |
| 2638 | Q96N83           | 2                    | 2              | 4.2                   | 518    | 54577  | 5.6 | CDNA FLJ31254 fis, clone KIDNE2005526, highly similar to Homo sapiens podocalyxin-like protein mRNA                                                                                                                |
| 2638 | Q53ER6           | 2                    | 2              | 4.2                   | 526    | 55400  | 5.6 | Podocalyxin-like variant                                                                                                                                                                                           |
| 2638 | Q52LZ7           | 2                    | 2              | 4.2                   | 526    | 55386  | 5.6 | Podocalyxin-like                                                                                                                                                                                                   |
| 2638 | UPI000042467C    | 2                    | 2              | 3.9                   | 558    | 58635  | 5.5 | podocalyxin-like precursor isoform 1                                                                                                                                                                               |
| 2639 | O94964           | 2                    | 2              | 4.2                   | 518    | 55761  | 9.1 | Uncharacterized protein C20orf117                                                                                                                                                                                  |
| 2639 | Q5T2J2           | 2                    | 2              | 1.3                   | 1661   | 183857 | 6.5 | Novel protein                                                                                                                                                                                                      |
| 2640 | Q9BPW0           | 2                    | 5              | 4.3                   | 484    | 55096  | 6.2 | PPP5C protein                                                                                                                                                                                                      |
| 2640 | P53041           | 2                    | 5              | 4.2                   | 499    | 56879  | 6.3 | Serine/threonine-protein phosphatase 5                                                                                                                                                                             |
| 2640 | Q53FR0           | 2                    | 5              | 4.2                   | 499    | 56907  | 6.3 | Protein phosphatase 5, catalytic subunit variant                                                                                                                                                                   |
| 2641 | Q6P1Q2           | 2                    | 3              | 4.8                   | 484    | 52550  | 8.8 | N-PAC protein                                                                                                                                                                                                      |
| 2641 | Q9BT11           | 2                    | 3              | 4.4                   | 523    | 57215  | 9.2 | Similar to RIKEN cDNA 3930401K13 gene                                                                                                                                                                              |
| 2641 | UPI000059D307    | 2                    | 3              | 4.3                   | 536    | 58637  | 9.2 | cytokine-like nuclear factor n-pac                                                                                                                                                                                 |
| 2641 | Q49A26           | 2                    | 3              | 4.2                   | 553    | 60606  | 9.2 | Cytokine-like nuclear factor n-pac                                                                                                                                                                                 |
| 2641 | UPI00001FF8EE    | 2                    | 3              | 4.2                   | 553    | 60556  | 9.2 | cytokine-like nuclear factor n-pac                                                                                                                                                                                 |
| 2641 | Q6V3W7           | 2                    | 3              | 4.2                   | 553    | 60547  | 9.2 | Cytokine-like nuclear factor n-pac-like protein                                                                                                                                                                    |
| 2641 | Q5U632           | 2                    | 3              | 4.2                   | 553    | 60548  | 9.1 | Cytokine-like nuclear factor n-pac                                                                                                                                                                                 |



| No.  | Accession Number | Unique Peptide Count | Spectrum Count | Sequence Coverage (%) | Length | MolWt | pI  | Descriptive Name                                                                                                                                                                                                                                 |
|------|------------------|----------------------|----------------|-----------------------|--------|-------|-----|--------------------------------------------------------------------------------------------------------------------------------------------------------------------------------------------------------------------------------------------------|
| 2642 | Q96DP0           | 2                    | 2              | 4.4                   | 456    | 49245 | 9   | CDNA FLJ31479 fis, clone NT2NE2001634, moderately similar to NADH- UBIQUINONE OXIDOREDUCTASE 9 KD SUBUNIT                                                                                                                                        |
| 2642 | Q8WU60           | 2                    | 2              | 4.2                   | 473    | 50983 | 9.2 | NADH dehydrogenase (Ubiquinone) flavoprotein 3, 10kDa                                                                                                                                                                                            |
| 2642 | UPI000037848B    | 2                    | 2              | 4.2                   | 473    | 50984 | 9.2 | NADH-ubiquinone oxidoreductase flavoprotein 3 isoform a precursor                                                                                                                                                                                |
| 2643 | Q96D46           | 2                    | 4              | 4.2                   | 503    | 57603 | 7.1 | Protein NMD3 homolog                                                                                                                                                                                                                             |
| 2643 | Q9Y2Z6           | 2                    | 4              | 4.2                   | 503    | 57585 | 7.1 | CGI-07 protein                                                                                                                                                                                                                                   |
| 2644 | P17405           | 2                    | 2              | 4.1                   | 629    | 69851 | 7.4 | Sphingomyelin phosphodiesterase precursor                                                                                                                                                                                                        |
| 2644 | UPI000013E592    | 2                    | 2              | 4.1                   | 631    | 69936 | 7.3 | sphingomyelin phosphodiesterase 1, acid lysosomal isoform 1 precursor                                                                                                                                                                            |
| 2644 | UPI0000D625A9    | 2                    | 2              | 3.9                   | 664    | 73082 | 7.5 | Sphingomyelin phosphodiesterase precursor (EC 3.1.4.12) (Acid sphingomyelinase) (aSMase).                                                                                                                                                        |
| 2644 | Q59EN6           | 2                    | 2              | 3.9                   | 664    | 73054 | 7.5 | Sphingomyelin phosphodiesterase 1, acid lysosomal isoform 1 variant                                                                                                                                                                              |
| 2645 | Q85KV2           | 2                    | 8              | 4.1                   | 459    | 51623 | 9.4 | NADH dehydrogenase subunit 4                                                                                                                                                                                                                     |
| 2646 | UPI000014077B    | 2                    | 2              | 4.3                   | 414    | 47829 | 8.5 | tRNA-nucleotidyltransferase 1, mitochondrial precursor (EC 2.7.7.25) (Mitochondrial tRNA nucleotidyl transferase, CCA-adding) (mt tRNA adenyltransferase) (mt tRNA CCA-pyrophosphorylase) (mt tRNA CCA- diphosphorylase) (mt CCA-adding enzyme). |
| 2646 | Q96Q11-2         | 2                    | 2              | 4.3                   | 414    | 47845 | 8.5 | Isoform 2 of Q96Q11                                                                                                                                                                                                                              |
| 2646 | Q96Q11           | 2                    | 2              | 4.1                   | 434    | 50144 | 8.1 | tRNA-nucleotidyltransferase 1, mitochondrial precursor                                                                                                                                                                                           |
| 2646 | UPI000013CD08    | 2                    | 2              | 4.1                   | 434    | 50128 | 8.1 | tRNA-nucleotidyltransferase 1, mitochondrial precursor (EC 2.7.7.25) (Mitochondrial tRNA nucleotidyl transferase, CCA-adding) (mt tRNA adenyltransferase) (mt tRNA CCA-pyrophosphorylase) (mt tRNA CCA- diphosphorylase) (mt CCA-adding enzyme). |
| 2647 | Q9NY61           | 2                    | 3              | 4.1                   | 560    | 63133 | 4.9 | Protein AATF                                                                                                                                                                                                                                     |
| 2647 | UPI000013C869    | 2                    | 3              | 4.1                   | 562    | 63291 | 4.9 | Protein AATF (Apoptosis-antagonizing transcription factor) (Rb-binding protein Che-1).                                                                                                                                                           |
| 2648 | P40763           | 2                    | 9              | 4                     | 770    | 88068 | 6.3 | Signal transducer and activator of transcription 3                                                                                                                                                                                               |
| 2648 | P40763-2         | 2                    | 9              | 4                     | 769    | 87981 | 6.3 | Isoform Del                                                                                                                                                                                                                                      |
| 2649 | UPI000045647B    | 2                    | 2              | 4.6                   | 439    | 49848 | 7.2 | Tripartite motif-containing protein 22 (RING finger protein 94) (50 kDa-stimulated trans-acting factor) (Staf-50).                                                                                                                               |
| 2649 | Q05CQ0           | 2                    | 2              | 4                     | 498    | 56946 | 7.8 | Tripartite motif-containing 22                                                                                                                                                                                                                   |

| No.  | Accession Number | Unique Peptide Count | Spectrum Count | Sequence Coverage (%) | Length | MolWt  | pI   | Descriptive Name                                                                                                                                                                                |
|------|------------------|----------------------|----------------|-----------------------|--------|--------|------|-------------------------------------------------------------------------------------------------------------------------------------------------------------------------------------------------|
| 2649 | UPI000045647A    | 2                    | 2              | 4                     | 496    | 56398  | 7.5  | Tripartite motif-containing protein 22 (RING finger protein 94) (50 kDa-stimulated trans-acting factor) (Staf-50).                                                                              |
| 2649 | Q8IYM9-2         | 2                    | 2              | 4                     | 494    | 56429  | 7.7  | Isoform 2 of Q8IYM9                                                                                                                                                                             |
| 2649 | Q8IYM9           | 2                    | 2              | 4                     | 498    | 56947  | 7.7  | Tripartite motif-containing protein 22                                                                                                                                                          |
| 2650 | Q5T4Q0           | 2                    | 2              | 7.3                   | 316    | 36595  | 5.3  | Vacuolar protein sorting 45A                                                                                                                                                                    |
| 2650 | Q53FR8           | 2                    | 2              | 4                     | 570    | 65070  | 8.2  | Vacuolar protein sorting 45A variant                                                                                                                                                            |
| 2650 | Q9NRW7           | 2                    | 2              | 4                     | 570    | 65077  | 8.2  | Vacuolar protein sorting-associated protein 45                                                                                                                                                  |
| 2651 | Q9BYH2           | 2                    | 16             | 4                     | 494    | 54424  | 9.2  | Cystine/glutamate exchanger                                                                                                                                                                     |
| 2651 | Q9UPY5           | 2                    | 16             | 4                     | 501    | 55423  | 9.2  | Cystine/glutamate transporter                                                                                                                                                                   |
| 2652 | Q13112           | 2                    | 3              | 3.9                   | 559    | 61493  | 7.5  | Chromatin assembly factor 1 subunit B                                                                                                                                                           |
| 2653 | Q6DEN2           | 2                    | 4              | 3.9                   | 684    | 73910  | 6.6  | DPYSL3 protein                                                                                                                                                                                  |
| 2653 | UPI000020CF0E    | 2                    | 4              | 3.9                   | 684    | 73911  | 6.4  | Dihydropyrimidinase-related protein 3 (DRP-3) (Unc-33-like phosphoprotein) (ULIP protein) (Collapsin response mediator protein 4) (CRMP-4).                                                     |
| 2654 | Q8ND56           | 2                    | 2              | 3.9                   | 463    | 50530  | 9.5  | LSM14 protein homolog A                                                                                                                                                                         |
| 2654 | UPI000006F08C    | 2                    | 2              | 3.9                   | 463    | 50526  | 9.4  | LSM14 homolog A                                                                                                                                                                                 |
| 2654 | Q8ND56-2         | 2                    | 2              | 3.9                   | 463    | 50554  | 9.5  | Isoform 2 of Q8ND56                                                                                                                                                                             |
| 2655 | UPI0000456DE5    | 2                    | 2              | 3.9                   | 768    | 88810  | 9.3  | GC-rich sequence DNA-binding factor (GCF) (Transcription factor 9) (TCF-9).                                                                                                                     |
| 2656 | Q12873           | 2                    | 2              | 3.8                   | 2000   | 226590 | 7.3  | Chromodomain helicase-DNA-binding protein 3                                                                                                                                                     |
| 2656 | UPI00004432F5    | 2                    | 2              | 3.7                   | 2045   | 231360 | 6.4  | chromodomain helicase DNA binding protein 3 isoform 3                                                                                                                                           |
| 2657 | Q14694           | 2                    | 2              | 3.8                   | 798    | 87134  | 5.3  | Ubiquitin carboxyl-terminal hydrolase 10                                                                                                                                                        |
| 2658 | Q86VT2           | 2                    | 2              | 3.9                   | 511    | 55943  | 9    | FAAH2 protein                                                                                                                                                                                   |
| 2658 | Q6GMR7           | 2                    | 2              | 3.8                   | 532    | 58304  | 9.1  | Fatty acid amide hydrolase 2                                                                                                                                                                    |
| 2658 | Q96N98           | 2                    | 2              | 3.8                   | 532    | 58332  | 9.1  | CDNA FLJ31204 fis, clone KIDNE2003305, weakly similar to PUTATIVE AMIDASE AF1954                                                                                                                |
| 2659 | Q96KG9-5         | 2                    | 2              | 5                     | 626    | 69238  | 8.7  | Isoform 5 of Q96KG9                                                                                                                                                                             |
| 2659 | Q96KG9-3         | 2                    | 2              | 4.4                   | 707    | 78696  | 8.4  | Isoform 3 of Q96KG9                                                                                                                                                                             |
| 2659 | UPI0000D62632    | 2                    | 2              | 4                     | 783    | 85686  | 8    | N-terminal kinase-like protein (SCY1-like protein 1) (Teratoma-associated tyrosine kinase) (Telomerase transcriptional element- interacting factor) (Telomerase regulation-associated protein). |
| 2659 | Q96KG9-4         | 2                    | 2              | 4                     | 781    | 86312  | 6.6  | Isoform 4 of Q96KG9                                                                                                                                                                             |
| 2659 | Q96KG9-6         | 2                    | 2              | 3.9                   | 787    | 86371  | 8.7  | Isoform 6 of Q96KG9                                                                                                                                                                             |
| 2659 | Q96KG9-2         | 2                    | 2              | 3.9                   | 791    | 88089  | 6.3  | Isoform 2 of Q96KG9                                                                                                                                                                             |
| 2659 | Q96KG9           | 2                    | 2              | 3.8                   | 808    | 89631  | 6.3  | N-terminal kinase-like protein                                                                                                                                                                  |
| 2660 | UPI0000DD8621    | 2                    | 2              | 3.8                   | 560    | 57049  | 9.3  | PREDICTED: hypothetical protein                                                                                                                                                                 |
| 2661 | Q12884           | 2                    | 3              | 3.7                   | 760    | 87794  | 6.8  | Seprase                                                                                                                                                                                         |
| 2661 | Q53TP5           | 2                    | 3              | 3.7                   | 760    | 87713  | 6.6  | Hypothetical protein FAP                                                                                                                                                                        |
| 2662 | Q13427-2         | 2                    | 3              | 7.8                   | 357    | 40299  | 9.7  | Isoform 2 of Q13427                                                                                                                                                                             |
| 2662 | Q6GMS9           | 2                    | 3              | 7                     | 402    | 46174  | 10.1 | PPIG protein                                                                                                                                                                                    |
| 2662 | Q32LZ0           | 2                    | 3              | 6.2                   | 448    | 51715  | 10.2 | Hypothetical protein                                                                                                                                                                            |
| 2662 | Q2NKQ6           | 2                    | 3              | 3.8                   | 739    | 87103  | 10.3 | PPIG protein                                                                                                                                                                                    |
| 2662 | Q13427           | 2                    | 3              | 3.7                   | 754    | 88618  | 10.3 | Peptidyl-prolyl cis-trans isomerase G                                                                                                                                                           |

| No.  | Accession Number | Unique Peptide Count | Spectrum Count | Sequence Coverage (%) | Length | MolWt  | pI   | Descriptive Name                                                                                                                                                                                                                                               |
|------|------------------|----------------------|----------------|-----------------------|--------|--------|------|----------------------------------------------------------------------------------------------------------------------------------------------------------------------------------------------------------------------------------------------------------------|
| 2662 | UPI000013D124    | 2                    | 3              | 3.7                   | 754    | 88617  | 10.3 | peptidyl-prolyl isomerase G (cyclophilin G)                                                                                                                                                                                                                    |
| 2663 | UPI0000EF7C5E    | 2                    | 2              | 3.7                   | 674    | 77378  | 6.2  | Thimet oligopeptidase                                                                                                                                                                                                                                          |
| 2663 | P52888           | 2                    | 2              | 3.6                   | 689    | 78840  | 6    | Thimet oligopeptidase                                                                                                                                                                                                                                          |
| 2663 | Q96CV8           | 2                    | 2              | 3.6                   | 689    | 78824  | 6    | Thimet oligopeptidase 1                                                                                                                                                                                                                                        |
| 2664 | Q9NVT0           | 2                    | 4              | 4.4                   | 656    | 75118  | 5.6  | CDNA FLJ10534 fis, clone NT2RP2001065                                                                                                                                                                                                                          |
| 2664 | Q8WUY5           | 2                    | 4              | 3.8                   | 759    | 86857  | 6.3  | TSR1 protein                                                                                                                                                                                                                                                   |
| 2664 | Q2NL82           | 2                    | 4              | 3.6                   | 804    | 91810  | 7.4  | TSR1, 20S rRNA accumulation, homolog                                                                                                                                                                                                                           |
| 2664 | Q9P2E6           | 2                    | 4              | 3.4                   | 853    | 97049  | 8    | Pre-rRNA-processing protein TSR1 homolog                                                                                                                                                                                                                       |
| 2665 | Q9UBU9           | 2                    | 8              | 3.6                   | 619    | 70182  | 8.5  | Nuclear RNA export factor 1                                                                                                                                                                                                                                    |
| 2666 | Q5UW38           | 2                    | 4              | 3.5                   | 596    | 64028  | 8.2  | L9                                                                                                                                                                                                                                                             |
| 2666 | UPI00004C9B11    | 2                    | 4              | 3.5                   | 596    | 64002  | 8.2  | PDZ and LIM domain 5 isoform a                                                                                                                                                                                                                                 |
| 2666 | UPI00001401C7    | 2                    | 4              | 3.5                   | 596    | 63945  | 8.2  | PDZ and LIM domain protein 5 (Enigma homolog) (Enigma-like PDZ and LIM domains protein).                                                                                                                                                                       |
| 2666 | Q96HC4           | 2                    | 4              | 3.5                   | 596    | 63972  | 8.2  | PDZ and LIM domain protein 5                                                                                                                                                                                                                                   |
| 2667 | Q8IUH4           | 2                    | 4              | 3.5                   | 622    | 70889  | 8.1  | Probable palmitoyltransferase ZDHHC13                                                                                                                                                                                                                          |
| 2667 | UPI0000D625CD    | 2                    | 4              | 3.5                   | 622    | 70818  | 8    | Probable palmitoyltransferase ZDHHC13 (EC 2.3.1.-) (Zinc finger DHHC domain-containing protein 13) (DHHC-13) (Huntingtin-interacting protein 14-related protein) (HIP14-related protein) (Huntingtin-interacting protein HIP3RP) (Putative NF-kappa-B-activati |
| 2667 | UPI000015F967    | 2                    | 4              | 3.5                   | 622    | 70861  | 8.1  | zinc finger, DHHC domain containing 13 isoform 1                                                                                                                                                                                                               |
| 2668 | Q99459           | 2                    | 5              | 3.5                   | 802    | 92251  | 8.2  | Cell division cycle 5-like protein                                                                                                                                                                                                                             |
| 2669 | O60645-2         | 2                    | 9              | 4.1                   | 641    | 73797  | 7.1  | Isoform 2 of O60645                                                                                                                                                                                                                                            |
| 2669 | O60645           | 2                    | 9              | 3.4                   | 756    | 86845  | 6.1  | Exocyst complex component 3                                                                                                                                                                                                                                    |
| 2670 | P35240-4         | 2                    | 3              | 3.9                   | 507    | 59096  | 7.2  | Isoform 4 of P35240                                                                                                                                                                                                                                            |
| 2670 | P35240-8         | 2                    | 3              | 3.6                   | 561    | 65350  | 6.6  | Isoform 8 of P35240                                                                                                                                                                                                                                            |
| 2670 | P35240-6         | 2                    | 3              | 3.6                   | 548    | 63997  | 6.2  | Isoform 6 of P35240                                                                                                                                                                                                                                            |
| 2670 | P35240-5         | 2                    | 3              | 3.6                   | 549    | 64189  | 8.2  | Isoform 5 of P35240                                                                                                                                                                                                                                            |
| 2670 | P35240           | 2                    | 3              | 3.4                   | 595    | 69690  | 6.5  | Merlin                                                                                                                                                                                                                                                         |
| 2670 | P35240-3         | 2                    | 3              | 3.4                   | 590    | 69090  | 6.7  | Isoform 3 of P35240                                                                                                                                                                                                                                            |
| 2670 | UPI0000457069    | 2                    | 3              | 3.2                   | 617    | 72107  | 7.3  | Merlin (Moesin-ezrin-radixin-like protein) (Neurofibromin-2) (Schwannomin) (Schwannomerlin).                                                                                                                                                                   |
| 2670 | P35240-2         | 2                    | 3              | 3.2                   | 620    | 72514  | 7.1  | Isoform 2 of P35240                                                                                                                                                                                                                                            |
| 2671 | Q56A80           | 2                    | 2              | 4.2                   | 523    | 58330  | 8.8  | IDUA protein                                                                                                                                                                                                                                                   |
| 2671 | P35475           | 2                    | 2              | 3.4                   | 653    | 72670  | 9.1  | Alpha-L-iduronidase precursor                                                                                                                                                                                                                                  |
| 2672 | Q12929           | 2                    | 7              | 3.4                   | 822    | 91882  | 7.5  | Epidermal growth factor receptor kinase substrate 8                                                                                                                                                                                                            |
| 2672 | UPI000013DC63    | 2                    | 7              | 3.4                   | 824    | 92040  | 7.5  | Epidermal growth factor receptor kinase substrate 8.                                                                                                                                                                                                           |
| 2673 | Q4G0J3           | 2                    | 3              | 3.4                   | 582    | 66899  | 9.6  | La-related protein 7                                                                                                                                                                                                                                           |
| 2674 | Q5RKV4           | 2                    | 3              | 6.4                   | 487    | 54778  | 6.2  | Ankyrin repeat and FYVE domain containing 1                                                                                                                                                                                                                    |
| 2674 | Q5H9P4           | 2                    | 3              | 3.4                   | 924    | 99824  | 6.3  | Hypothetical protein DKFZp686M19106                                                                                                                                                                                                                            |
| 2674 | UPI00004569F8    | 2                    | 3              | 2.7                   | 1168   | 128295 | 6.1  | Ankyrin repeat and FYVE domain-containing protein 1 (Ankyrin repeats hooked to a zinc finger motif).                                                                                                                                                           |

| No.  | Accession Number | Unique Peptide Count | Spectrum Count | Sequence Coverage (%) | Length | MolWt  | pI  | Descriptive Name                                                                                                           |
|------|------------------|----------------------|----------------|-----------------------|--------|--------|-----|----------------------------------------------------------------------------------------------------------------------------|
| 2674 | Q9P2R3           | 2                    | 3              | 2.7                   | 1169   | 128399 | 6.1 | Ankyrin repeat and FYVE domain-containing protein 1                                                                        |
| 2674 | UPI0000D4BE3E    | 2                    | 3              | 2.6                   | 1170   | 128486 | 6.1 | ankyrin repeat and FYVE domain containing 1 isoform 1                                                                      |
| 2675 | Q9BTX1-4         | 2                    | 2              | 4.2                   | 542    | 61009  | 8.9 | Isoform 4 of Q9BTX1                                                                                                        |
| 2675 | Q9BTX1           | 2                    | 2              | 3.4                   | 674    | 76305  | 9.1 | Nucleoporin NDC1                                                                                                           |
| 2675 | UPI000006DFC8    | 2                    | 2              | 3.4                   | 674    | 76363  | 9   | transmembrane protein 48                                                                                                   |
| 2675 | Q9BTX1-2         | 2                    | 2              | 3.4                   | 673    | 76234  | 9.1 | Isoform 2 of Q9BTX1                                                                                                        |
| 2676 | UPI0000131B9E    | 2                    | 4              | 3.7                   | 738    | 80827  | 6.1 | phospholipase A2-activating protein isoform 2                                                                              |
| 2676 | Q9Y263           | 2                    | 4              | 3.4                   | 795    | 87157  | 6.4 | Phospholipase A-2-activating protein                                                                                       |
| 2677 | Q9Y4W2-3         | 2                    | 2              | 3.7                   | 675    | 76845  | 4.7 | Isoform 3 of Q9Y4W2                                                                                                        |
| 2677 | Q9Y4W2-2         | 2                    | 2              | 3.5                   | 717    | 81243  | 4.7 | Isoform 2 of Q9Y4W2                                                                                                        |
| 2677 | Q9Y4W2           | 2                    | 2              | 3.4                   | 734    | 83065  | 4.7 | LAS1-like protein                                                                                                          |
| 2678 | P23786           | 2                    | 2              | 3.3                   | 658    | 73777  | 8.2 | Carnitine O-palmitoyltransferase 2, mitochondrial precursor                                                                |
| 2679 | Q6NUM9-2         | 2                    | 10             | 4.2                   | 481    | 52439  | 8   | Isoform 2 of Q6NUM9                                                                                                        |
| 2679 | Q6NUM9           | 2                    | 10             | 3.3                   | 610    | 66820  | 8.3 | All-trans-retinol 13,14-reductase precursor                                                                                |
| 2679 | UPI0000072C67    | 2                    | 10             | 3.3                   | 610    | 66793  | 8.3 | all-trans-13,14-dihydroretinol saturase                                                                                    |
| 2680 | Q9P263           | 2                    | 2              | 3.3                   | 785    | 83604  | 5.7 | Immunoglobulin superfamily containing leucine-rich repeat 2                                                                |
| 2681 | O60231           | 2                    | 2              | 3.2                   | 1041   | 119263 | 6.8 | Putative pre-mRNA-splicing factor ATP-dependent RNA helicase DHX16                                                         |
| 2681 | UPI0000161FB0    | 2                    | 2              | 3.2                   | 1041   | 119172 | 6.7 | DEAH (Asp-Glu-Ala-His) box polypeptide 16                                                                                  |
| 2682 | O76031           | 2                    | 6              | 3.2                   | 633    | 69224  | 7.6 | ATP-dependent Clp protease ATP-binding subunit ClpX-like, mitochondrial precursor                                          |
| 2683 | Q9BSN5           | 2                    | 5              | 6                     | 517    | 57070  | 6.3 | Hypothetical protein                                                                                                       |
| 2683 | Q2VPA0           | 2                    | 5              | 3.7                   | 848    | 95097  | 6.7 | PRSS15 protein                                                                                                             |
| 2683 | Q8N8K8           | 2                    | 5              | 3.5                   | 895    | 100397 | 6.7 | CDNA FLJ39307 fis, clone OCBBF2013208, highly similar to MITOCHONDRIAL LON PROTEASE                                        |
| 2683 | P36776           | 2                    | 5              | 3.2                   | 959    | 106489 | 6.4 | Lon protease homolog, mitochondrial precursor                                                                              |
| 2684 | Q58F15           | 2                    | 4              | 3.4                   | 949    | 105744 | 6.2 | EPHA4 protein                                                                                                              |
| 2684 | P54764           | 2                    | 4              | 3.2                   | 986    | 109860 | 6.6 | Ephrin type-A receptor 4 precursor                                                                                         |
| 2685 | Q6PJE1           | 2                    | 5              | 4.4                   | 686    | 79971  | 5.3 | NUP107 protein                                                                                                             |
| 2685 | P57740           | 2                    | 5              | 3.2                   | 925    | 106374 | 5.4 | Nuclear pore complex protein Nup107                                                                                        |
| 2686 | Q9NPH3-3         | 2                    | 4              | 5.2                   | 346    | 39743  | 6.3 | Isoform 3 of Q9NPH3                                                                                                        |
| 2686 | Q9NPH3-2         | 2                    | 4              | 5.1                   | 356    | 41019  | 7.3 | Isoform 2 of Q9NPH3                                                                                                        |
| 2686 | Q9NPH3           | 2                    | 4              | 3.2                   | 570    | 65419  | 8.1 | Interleukin-1 receptor accessory protein precursor                                                                         |
| 2687 | UPI0000457706    | 2                    | 2              | 3.4                   | 563    | 61132  | 7.9 | Glycosylphosphatidylinositol anchor attachment 1 protein (GPI anchor attachment protein 1) (GAA1 protein homolog) (hGAA1). |
| 2687 | O43292           | 2                    | 2              | 3.1                   | 621    | 67623  | 8.1 | Glycosylphosphatidylinositol anchor attachment 1 protein                                                                   |
| 2687 | UPI0000457705    | 2                    | 2              | 3                     | 623    | 67657  | 8.2 | Glycosylphosphatidylinositol anchor attachment 1 protein (GPI anchor attachment protein 1) (GAA1 protein homolog) (hGAA1). |

| No.  | Accession Number | Unique Peptide Count | Spectrum Count | Sequence Coverage (%) | Length | MolWt  | pI  | Descriptive Name                                                                                                                                             |
|------|------------------|----------------------|----------------|-----------------------|--------|--------|-----|--------------------------------------------------------------------------------------------------------------------------------------------------------------|
| 2688 | Q04446           | 2                    | 6              | 3.1                   | 702    | 80460  | 6.3 | 1,4-alpha-glucan branching enzyme                                                                                                                            |
| 2688 | UPI0000457142    | 2                    | 6              | 3.1                   | 702    | 80540  | 6.3 | 1,4-alpha-glucan branching enzyme (EC 2.4.1.18) (Glycogen branching enzyme) (Brancher enzyme).                                                               |
| 2688 | UPI0000209A24    | 2                    | 6              | 3.1                   | 702    | 80474  | 6.3 | glucan (1,4-alpha-), branching enzyme 1                                                                                                                      |
| 2689 | Q86SW2           | 2                    | 2              | 8.1                   | 273    | 31287  | 5.2 | Full-length cDNA 5-PRIME end of clone CS0DK005YC03 of HeLa cells of Homo sapiens                                                                             |
| 2689 | Q13330-2         | 2                    | 2              | 5.1                   | 430    | 49017  | 5.5 | Isoform Short of Q13330                                                                                                                                      |
| 2689 | Q13330           | 2                    | 2              | 3.1                   | 715    | 80788  | 9.3 | Metastasis-associated protein MTA1                                                                                                                           |
| 2689 | UPI00003669FD    | 2                    | 2              | 3.1                   | 715    | 80786  | 9.3 | metastasis associated protein                                                                                                                                |
| 2690 | Q2UZW3           | 2                    | 3              | 3.1                   | 818    | 91329  | 5.3 | XB130                                                                                                                                                        |
| 2690 | Q8N4X5-2         | 2                    | 3              | 3.1                   | 814    | 90860  | 5.3 | Isoform 2 of Q8N4X5                                                                                                                                          |
| 2690 | Q8N4X5           | 2                    | 3              | 3.1                   | 818    | 91300  | 5.3 | Actin filament-associated protein 1-like 2                                                                                                                   |
| 2691 | Q9H078-2         | 2                    | 2              | 3.2                   | 677    | 75449  | 9   | Isoform 2 of Q9H078                                                                                                                                          |
| 2691 | Q9H078           | 2                    | 2              | 3.1                   | 707    | 78729  | 9   | Caseinolytic peptidase B protein homolog                                                                                                                     |
| 2692 | Q8TEG6           | 2                    | 35             | 8.2                   | 354    | 38908  | 5.2 | FLJ00231 protein                                                                                                                                             |
| 2692 | Q6ZVG3           | 2                    | 35             | 8.2                   | 352    | 38486  | 6.3 | CDNA FLJ42617 fis, clone BRACE3014807                                                                                                                        |
| 2692 | UPI0000199C26    | 2                    | 35             | 5.9                   | 491    | 54139  | 5.3 | tweety 3                                                                                                                                                     |
| 2692 | Q9C0H2           | 2                    | 35             | 5.2                   | 558    | 61119  | 6.1 | Tweety homolog 3                                                                                                                                             |
| 2692 | A4D201           | 2                    | 35             | 3                     | 951    | 102588 | 7.2 | Tweety homolog 3                                                                                                                                             |
| 2693 | O43772           | 2                    | 3              | 3                     | 301    | 32944  | 9.4 | Mitochondrial carnitine/acylcarnitine carrier protein                                                                                                        |
| 2693 | UPI00006C071D    | 2                    | 3              | 3                     | 303    | 33298  | 9.3 | PREDICTED: similar to Mitochondrial carnitine/acylcarnitine carrier protein (Carnitine/acylcarnitine translocase) (CAC) (Solute carrier family 25 member 20) |
| 2694 | P23677           | 2                    | 2              | 3                     | 461    | 51009  | 7.7 | Inositol-trisphosphate 3-kinase A                                                                                                                            |
| 2695 | P48960-2         | 2                    | 11             | 3.4                   | 742    | 81743  | 7.1 | Isoform 2 of P48960                                                                                                                                          |
| 2695 | P48960-3         | 2                    | 11             | 3.2                   | 786    | 86628  | 6.9 | Isoform 3 of P48960                                                                                                                                          |
| 2695 | P48960           | 2                    | 11             | 3                     | 835    | 91869  | 6.9 | CD97 antigen precursor                                                                                                                                       |
| 2696 | Q8N2B3           | 2                    | 4              | 6.5                   | 491    | 54656  | 6   | CDNA FLJ33559 fis, clone BRAMY2009528                                                                                                                        |
| 2696 | Q96JJ0           | 2                    | 4              | 5                     | 639    | 70428  | 5.7 | KIAA1837 protein                                                                                                                                             |
| 2696 | Q9H7V0           | 2                    | 4              | 4.6                   | 691    | 76234  | 5.7 | CDNA FLJ14225 fis, clone NT2RP3004051                                                                                                                        |
| 2696 | Q7L1C9           | 2                    | 4              | 4.6                   | 699    | 77176  | 5.7 | KIAA0319L protein                                                                                                                                            |
| 2696 | Q8NDA0           | 2                    | 4              | 4.3                   | 746    | 82461  | 5.5 | Hypothetical protein DKFZp434C0829                                                                                                                           |
| 2696 | Q8WYZ5           | 2                    | 4              | 3.4                   | 946    | 103879 | 5.9 | Hypothetical protein                                                                                                                                         |
| 2696 | UPI00001B5642    | 2                    | 4              | 3.2                   | 996    | 109752 | 6.1 | polycystic kidney disease 1-like isoform b                                                                                                                   |
| 2696 | UPI000003F081    | 2                    | 4              | 3.1                   | 1049   | 115658 | 6   | polycystic kidney disease 1-like isoform a                                                                                                                   |
| 2696 | Q8WY39           | 2                    | 4              | 3.1                   | 1049   | 115732 | 6   | PP791 protein                                                                                                                                                |
| 2696 | Q8IZA0           | 2                    | 4              | 3.1                   | 1049   | 115718 | 6.1 | Polycystic kidney disease 1-related protein                                                                                                                  |
| 2696 | Q6PJJ7           | 2                    | 4              | 3.1                   | 1049   | 115584 | 6   | KIAA0319-like                                                                                                                                                |
| 2696 | Q5T225           | 2                    | 4              | 3                     | 1058   | 116614 | 6   | Protein KIAA0319-like                                                                                                                                        |
| 2697 | Q8N0X7           | 2                    | 2              | 3                     | 666    | 72833  | 5.9 | Spartin                                                                                                                                                      |
| 2698 | Q9H330-4         | 2                    | 13             | 5.4                   | 503    | 55419  | 9.3 | Isoform 4 of Q9H330                                                                                                                                          |
| 2698 | UPI0000D618E3    | 2                    | 13             | 3.1                   | 871    | 96251  | 8.8 | Uncharacterized protein C9orf5 (Protein CG-2).                                                                                                               |

| No.  | Accession Number | Unique Peptide Count | Spectrum Count | Sequence Coverage (%) | Length | MolWt  | pI  | Descriptive Name                                                               |
|------|------------------|----------------------|----------------|-----------------------|--------|--------|-----|--------------------------------------------------------------------------------|
| 2698 | Q9H330-2         | 2                    | 13             | 3.1                   | 879    | 97357  | 8.9 | Isoform 2 of Q9H330                                                            |
| 2698 | Q9H330           | 2                    | 13             | 3                     | 911    | 100945 | 8.9 | Uncharacterized protein C9orf5                                                 |
| 2698 | UPI000045778C    | 2                    | 13             | 3                     | 908    | 100541 | 8.9 | Uncharacterized protein C9orf5 (Protein CG-2).                                 |
| 2699 | Q9BXJ9-4         | 2                    | 4              | 3.4                   | 526    | 61602  | 8.2 | Isoform 2 of Q9BXJ9                                                            |
| 2699 | Q58F05           | 2                    | 4              | 2.9                   | 614    | 72387  | 8.4 | NARG1 protein                                                                  |
| 2699 | Q9BXJ9           | 2                    | 4              | 2.1                   | 866    | 101272 | 7.4 | NMDA receptor-regulated protein 1                                              |
| 2700 | Q96A78           | 2                    | 2              | 3                     | 808    | 89035  | 6.9 | TBL3 protein (Transducin (Beta)-like 3)                                        |
| 2700 | Q8IVB7           | 2                    | 2              | 3                     | 808    | 88936  | 6.9 | Transducin (Beta)-like 3                                                       |
| 2700 | Q59GD6           | 2                    | 2              | 2.9                   | 832    | 91238  | 7   | Transducin beta-like 3 variant                                                 |
| 2701 | UPI0000141B46    | 2                    | 3              | 6                     | 418    | 47480  | 5   | Leucine-rich repeat and IQ domain-containing protein 2.                        |
| 2701 | Q8NA71           | 2                    | 3              | 6                     | 418    | 47514  | 5   | CDNA FLJ35781 fis, clone TESTI2005395                                          |
| 2701 | Q8IW35           | 2                    | 3              | 2.9                   | 865    | 96981  | 5   | Leucine-rich repeat and IQ domain-containing protein 2                         |
| 2702 | Q8NFP3           | 2                    | 2              | 2.9                   | 622    | 71762  | 8.8 | Gag protein                                                                    |
| 2703 | UPI000059DB76    | 2                    | 2              | 3.2                   | 597    | 68393  | 8.1 | Angiomotin.                                                                    |
| 2703 | A2BDD9           | 2                    | 2              | 2.8                   | 676    | 72637  | 6.7 | AMOT protein                                                                   |
| 2703 | Q4VCS5           | 2                    | 2              | 1.8                   | 1084   | 118085 | 7.6 | Angiomotin                                                                     |
| 2704 | Q06124-3         | 2                    | 2              | 3.7                   | 460    | 52828  | 7.4 | Isoform 3 of Q06124                                                            |
| 2704 | Q06124-2         | 2                    | 2              | 2.9                   | 593    | 68011  | 7.3 | Isoform 2 of Q06124                                                            |
| 2704 | Q06124           | 2                    | 2              | 2.8                   | 597    | 68436  | 7.3 | Tyrosine-protein phosphatase non-receptor type 11                              |
| 2705 | Q13586           | 2                    | 2              | 2.8                   | 685    | 77493  | 6.7 | Stromal interaction molecule 1 precursor                                       |
| 2705 | Q8N382           | 2                    | 2              | 2.8                   | 685    | 77423  | 6.7 | Stromal interaction molecule 1                                                 |
| 2706 | Q86UE8-3         | 2                    | 2              | 3.1                   | 718    | 82348  | 8.3 | Isoform 3 of Q86UE8                                                            |
| 2706 | Q86UE8-2         | 2                    | 2              | 2.9                   | 750    | 85444  | 8.4 | Isoform 2 of Q86UE8                                                            |
| 2706 | Q86UE8           | 2                    | 2              | 2.8                   | 772    | 87661  | 8.4 | Serine/threonine-protein kinase tousled-like 2                                 |
| 2707 | Q9P0V3           | 2                    | 2              | 2.8                   | 963    | 107496 | 7.7 | SH3 domain-binding protein 4                                                   |
| 2708 | Q9P253           | 2                    | 2              | 2.8                   | 973    | 110186 | 6.1 | Vacuolar protein sorting-associated protein 18 homolog                         |
| 2709 | Q9P2I0           | 2                    | 10             | 2.8                   | 782    | 88487  | 5.1 | Cleavage and polyadenylation specificity factor subunit 2                      |
| 2710 | P11498           | 2                    | 2              | 2.7                   | 1178   | 129634 | 6.8 | Pyruvate carboxylase, mitochondrial precursor                                  |
| 2711 | Q08174           | 2                    | 2              | 2.7                   | 1026   | 111270 | 5   | Protocadherin-1 precursor                                                      |
| 2711 | UPI000045735F    | 2                    | 2              | 2.7                   | 1031   | 111812 | 5   | Protocadherin-1 precursor (Protocadherin-42) (PC42) (Cadherin-like protein 1). |
| 2711 | Q08174-2         | 2                    | 2              | 2.7                   | 1030   | 111704 | 5   | Isoform 2 of Q08174                                                            |
| 2711 | Q8IUP2           | 2                    | 2              | 2.6                   | 1060   | 114743 | 5   | Protocadherin 1                                                                |
| 2711 | UPI000016158F    | 2                    | 2              | 2.3                   | 1237   | 133722 | 5.1 | protocadherin 1 isoform 2 precursor                                            |
| 2712 | Q6VY07           | 2                    | 3              | 2.7                   | 963    | 104898 | 7.7 | Phosphofurin acidic cluster sorting protein 1                                  |
| 2712 | Q6VY07-2         | 2                    | 3              | 2.6                   | 1008   | 109342 | 7.4 | Isoform 2 of Q6VY07                                                            |
| 2713 | Q9BZQ6           | 2                    | 3              | 2.7                   | 889    | 100305 | 4.9 | ER degradation-enhancing alpha-mannosidase-like 3                              |
| 2714 | Q9Y3E9           | 2                    | 2              | 5.2                   | 404    | 45005  | 8.5 | CGI-151 protein                                                                |
| 2714 | Q9Y2J6           | 2                    | 2              | 2.7                   | 772    | 83643  | 7.7 | KIAA0992 protein                                                               |
| 2715 | Q9Y4E8           | 2                    | 2              | 2.7                   | 981    | 112419 | 5.2 | Ubiquitin carboxyl-terminal hydrolase 15                                       |
| 2715 | Q9Y4E8-3         | 2                    | 2              | 2.7                   | 956    | 109796 | 5.2 | Isoform 3 of Q9Y4E8                                                            |
| 2715 | Q9Y4E8-2         | 2                    | 2              | 2.7                   | 952    | 109297 | 5.2 | Isoform 2 of Q9Y4E8                                                            |
| 2716 | UPI0000074697    | 2                    | 2              | 2.7                   | 669    | 76394  | 7.5 | EF hand domain family, member B                                                |
| 2716 | UPI0000DBEEB5    | 2                    | 2              | 2.7                   | 669    | 76368  | 7.5 | EF-hand domain-containing family member B.                                     |

| No.  | Accession Number | Unique Peptide Count | Spectrum Count | Sequence Coverage (%) | Length | MolWt  | pI   | Descriptive Name                                                                                                      |
|------|------------------|----------------------|----------------|-----------------------|--------|--------|------|-----------------------------------------------------------------------------------------------------------------------|
| 2716 | UPI0000D61ADD    | 2                    | 2              | 2.7                   | 670    | 76467  | 7.5  | EF-hand domain-containing family member B.                                                                            |
| 2716 | UPI0000D61ADC    | 2                    | 2              | 2.6                   | 704    | 79671  | 7    | EF-hand domain-containing family member B.                                                                            |
| 2717 | P14735           | 2                    | 5              | 2.6                   | 1019   | 118022 | 6.8  | Insulin-degrading enzyme                                                                                              |
| 2717 | Q5T5N2           | 2                    | 5              | 2.6                   | 1019   | 117968 | 6.6  | Insulin-degrading enzyme                                                                                              |
| 2718 | Q6ZR79           | 2                    | 2              | 14.9                  | 154    | 17257  | 10.5 | CDNA FLJ46573 fis, clone THYMU3041603, moderately similar to Homo sapiens tubulin, gamma complex associated protein 2 |
| 2718 | UPI000045899B    | 2                    | 2              | 3.2                   | 721    | 82604  | 6.8  | Gamma-tubulin complex component 2 (GCP-2) (Spindle pole body protein Spc97 homolog) (hSpc97) (hGCP2) (h103p).         |
| 2718 | Q53EQ3           | 2                    | 2              | 2.6                   | 901    | 102449 | 6.8  | Tubulin, gamma complex associated protein 2 variant                                                                   |
| 2718 | Q9BSJ2           | 2                    | 2              | 2.5                   | 902    | 102534 | 6.8  | Gamma-tubulin complex component 2                                                                                     |
| 2719 | Q53H65           | 2                    | 4              | 2.6                   | 759    | 85666  | 9.2  | RNA binding motif protein 28 variant                                                                                  |
| 2719 | UPI000006F4A6    | 2                    | 4              | 2.6                   | 759    | 85766  | 9.2  | RNA binding motif protein 28                                                                                          |
| 2719 | Q9NW13           | 2                    | 4              | 2.6                   | 759    | 85738  | 9.2  | RNA-binding protein 28                                                                                                |
| 2720 | Q4G0Y5           | 2                    | 3              | 11.4                  | 193    | 21981  | 5.7  | CHERP protein                                                                                                         |
| 2720 | O00302           | 2                    | 3              | 2.5                   | 884    | 100015 | 9.2  | ERPROT 213-21                                                                                                         |
| 2720 | Q8WU30           | 2                    | 3              | 2.5                   | 884    | 99992  | 9.2  | Calcium homeostasis endoplasmic reticulum protein                                                                     |
| 2720 | UPI00001AE5BE    | 2                    | 3              | 2.4                   | 916    | 103702 | 9    | calcium homeostasis endoplasmic reticulum protein                                                                     |
| 2720 | Q8IWX8           | 2                    | 3              | 2.4                   | 916    | 103596 | 8.9  | Calcium homeostasis endoplasmic reticulum protein                                                                     |
| 2721 | P06400           | 2                    | 2              | 2.5                   | 928    | 106159 | 7.9  | Retinoblastoma-associated protein                                                                                     |
| 2721 | Q59HH0           | 2                    | 2              | 2.4                   | 960    | 109774 | 8.2  | Retinoblastoma-associated protein variant                                                                             |
| 2722 | UPI000006F9CB    | 2                    | 2              | 2.6                   | 1452   | 158481 | 9.7  | cell division cycle 2-like 5 isoform 2                                                                                |
| 2722 | Q14004-2         | 2                    | 2              | 2.6                   | 1452   | 158434 | 9.7  | Isoform 2 of Q14004                                                                                                   |
| 2722 | Q14004           | 2                    | 2              | 2.5                   | 1512   | 164922 | 9.7  | Cell division cycle 2-like protein kinase 5                                                                           |
| 2722 | UPI000006DA35    | 2                    | 2              | 2.5                   | 1512   | 164969 | 9.7  | cell division cycle 2-like 5 isoform 1                                                                                |
| 2723 | Q6P5Y2           | 2                    | 2              | 2.5                   | 609    | 68927  | 6.6  | MLL5 protein                                                                                                          |
| 2723 | Q9NWE7           | 2                    | 2              | 2.5                   | 594    | 67514  | 6.9  | CDNA FLJ10078 fis, clone HEMBA1001869                                                                                 |
| 2723 | Q8NFF8           | 2                    | 2              | 0.8                   | 1858   | 204786 | 7.6  | MLL5                                                                                                                  |
| 2723 | Q8IZD2           | 2                    | 2              | 0.8                   | 1858   | 204963 | 7.6  | Myeloid/lymphoid or mixed-lineage leukemia protein 5                                                                  |
| 2724 | Q7Z2Z2           | 2                    | 2              | 2.5                   | 1069   | 119889 | 5.8  | Elongation factor Tu GTP-binding domain-containing protein 1                                                          |
| 2724 | UPI00001FEA3A    | 2                    | 2              | 2.5                   | 1069   | 119887 | 5.8  | elongation factor Tu GTP binding domain containing 1 isoform 2                                                        |
| 2724 | UPI00001FEA35    | 2                    | 2              | 2.4                   | 1120   | 125430 | 5.9  | elongation factor Tu GTP binding domain containing 1 isoform 1                                                        |
| 2725 | Q8TA92           | 2                    | 4              | 2.5                   | 812    | 90194  | 9.1  | Similar to AFG3 ATPase family gene 3-like 2                                                                           |
| 2725 | Q9Y4W6           | 2                    | 4              | 2.5                   | 797    | 88584  | 8.7  | AFG3-like protein 2                                                                                                   |
| 2726 | Q8TD19           | 2                    | 2              | 2.5                   | 979    | 107168 | 5.7  | Serine/threonine-protein kinase Nek9                                                                                  |
| 2726 | UPI0000070F8F    | 2                    | 2              | 2.5                   | 979    | 107034 | 5.7  | NIMA related kinase 9                                                                                                 |

| No.  | Accession Number | Unique Peptide Count | Spectrum Count | Sequence Coverage (%) | Length | MolWt  | pI  | Descriptive Name                                                                                                             |
|------|------------------|----------------------|----------------|-----------------------|--------|--------|-----|------------------------------------------------------------------------------------------------------------------------------|
| 2727 | Q59F19           | 2                    | 2              | 2.8                   | 949    | 102591 | 9   | Proto-oncogene tyrosine-protein kinase ABL1 variant                                                                          |
| 2727 | P00519           | 2                    | 2              | 2.4                   | 1130   | 122872 | 8.7 | Proto-oncogene tyrosine-protein kinase ABL1                                                                                  |
| 2727 | Q59FK4           | 2                    | 2              | 2.3                   | 1167   | 127257 | 8.9 | V-abl Abelson murine leukemia viral oncogene homolog 1 isoform b variant                                                     |
| 2728 | P20936-2         | 2                    | 4              | 2.9                   | 870    | 100398 | 7.6 | Isoform 2 of P20936                                                                                                          |
| 2728 | P20936           | 2                    | 4              | 2.4                   | 1047   | 116403 | 6.5 | Ras GTPase-activating protein 1                                                                                              |
| 2728 | UPI000013DA03    | 2                    | 4              | 2.4                   | 1047   | 116391 | 6.5 | Ras GTPase-activating protein 1 (GTPase-activating protein) (GAP) (Ras p21 protein activator) (p120GAP) (RasGAP).            |
| 2729 | Q9BTX0           | 2                    | 3              | 2.6                   | 852    | 94370  | 6.7 | RNA binding motif protein 10                                                                                                 |
| 2729 | Q5JRR2           | 2                    | 3              | 2.6                   | 853    | 94469  | 6.7 | RNA binding motif protein 10                                                                                                 |
| 2729 | P98175           | 2                    | 3              | 2.4                   | 929    | 103459 | 6   | RNA-binding protein 10                                                                                                       |
| 2729 | Q9BTE4           | 2                    | 3              | 2.4                   | 930    | 103533 | 6   | RNA binding motif protein 10                                                                                                 |
| 2729 | Q7Z3D7           | 2                    | 3              | 2.2                   | 995    | 110338 | 6.2 | Hypothetical protein DKFZp686E2459                                                                                           |
| 2730 | Q6ZMZ3           | 2                    | 4              | 2.4                   | 975    | 112216 | 6.2 | Nesprin-3                                                                                                                    |
| 2730 | UPI0000225CD0    | 2                    | 4              | 2.4                   | 975    | 112244 | 6.2 | nesprin-3                                                                                                                    |
| 2730 | Q6ZMZ3-2         | 2                    | 4              | 2.4                   | 970    | 111677 | 6.2 | Isoform 2 of Q6ZMZ3                                                                                                          |
| 2731 | Q8TD16           | 2                    | 2              | 2.4                   | 824    | 93533  | 5.4 | Protein bicaudal D homolog 2                                                                                                 |
| 2731 | Q8TD16-2         | 2                    | 2              | 2.3                   | 855    | 96806  | 5.4 | Isoform 2 of Q8TD16                                                                                                          |
| 2732 | Q9H2K8           | 2                    | 2              | 2.4                   | 898    | 105406 | 7.3 | Serine/threonine-protein kinase TAO3                                                                                         |
| 2732 | UPI0000070EFD    | 2                    | 2              | 2.4                   | 898    | 105433 | 7.3 | TAO kinase 3                                                                                                                 |
| 2733 | UPI000013E31F    | 2                    | 3              | 2.5                   | 1035   | 117309 | 5.3 | retinoblastoma-associated protein 140                                                                                        |
| 2733 | Q9H2F7           | 2                    | 3              | 2.5                   | 1035   | 117350 | 5.3 | CTCL tumor antigen se89-1                                                                                                    |
| 2733 | A1L3A4           | 2                    | 3              | 2.3                   | 1116   | 126444 | 6.1 | C3orf63 protein                                                                                                              |
| 2733 | UPI000013E320    | 2                    | 3              | 2.1                   | 1233   | 139998 | 5.6 | retinoblastoma-associated protein 140                                                                                        |
| 2733 | Q9UK61           | 2                    | 3              | 2.1                   | 1233   | 139954 | 5.7 | Protein C3orf63                                                                                                              |
| 2734 | UPI000059D1C3    | 2                    | 9              | 2.8                   | 680    | 76423  | 6.6 | Fibroblast growth factor receptor 2 precursor (EC 2.7.10.1) (FGFR-2) (keratiocyte growth factor receptor 2) (CD332 antigen). |
| 2734 | P21802-4         | 2                    | 9              | 2.8                   | 682    | 76705  | 6.9 | Isoform 4 of P21802                                                                                                          |
| 2734 | UPI0000D60FEA    | 2                    | 9              | 2.7                   | 709    | 79843  | 5.8 | Fibroblast growth factor receptor 2 precursor (EC 2.7.10.1) (FGFR-2) (keratiocyte growth factor receptor 2) (CD332 antigen). |
| 2734 | UPI0000D60FE8    | 2                    | 9              | 2.7                   | 707    | 79500  | 6.8 | Fibroblast growth factor receptor 2 precursor (EC 2.7.10.1) (FGFR-2) (keratiocyte growth factor receptor 2) (CD332 antigen). |
| 2734 | UPI000059D1C5    | 2                    | 9              | 2.7                   | 707    | 79490  | 6.8 | Fibroblast growth factor receptor 2 precursor (EC 2.7.10.1) (FGFR-2) (keratiocyte growth factor receptor 2) (CD332 antigen). |
| 2734 | UPI000013D40D    | 2                    | 9              | 2.7                   | 705    | 79290  | 6.8 | Fibroblast growth factor receptor 2 precursor (EC 2.7.10.1) (FGFR-2) (keratiocyte growth factor receptor 2) (CD332 antigen). |
| 2734 | Q8IXC7           | 2                    | 9              | 2.7                   | 709    | 79833  | 5.8 | Isoform of FGFR2                                                                                                             |
| 2734 | P21802-20        | 2                    | 9              | 2.7                   | 704    | 79197  | 6.6 | Isoform 20 of P21802                                                                                                         |



| No.  | Accession Number | Unique Peptide Count | Spectrum Count | Sequence Coverage (%) | Length | MolWt  | pI  | Descriptive Name                                                                                                             |
|------|------------------|----------------------|----------------|-----------------------|--------|--------|-----|------------------------------------------------------------------------------------------------------------------------------|
| 2734 | P21802-15        | 2                    | 9              | 2.7                   | 705    | 79212  | 5.6 | Isoform 15 of P21802                                                                                                         |
| 2734 | UPI0000167E2D    | 2                    | 9              | 2.6                   | 731    | 82118  | 6.1 | Fibroblast growth factor receptor 2 precursor (EC 2.7.10.1) (FGFR-2) (keratiocyte growth factor receptor 2) (CD332 antigen). |
| 2734 | P21802-8         | 2                    | 9              | 2.5                   | 766    | 85929  | 6.3 | Isoform 8 of P21802                                                                                                          |
| 2734 | P21802-2         | 2                    | 9              | 2.5                   | 768    | 86130  | 6.3 | Isoform 2 of P21802                                                                                                          |
| 2734 | P21802-17        | 2                    | 9              | 2.5                   | 769    | 86223  | 6.5 | Isoform 17 of P21802                                                                                                         |
| 2734 | P21802-12        | 2                    | 9              | 2.5                   | 771    | 86407  | 6.5 | Isoform 12 of P21802                                                                                                         |
| 2734 | UPI0000456416    | 2                    | 9              | 2.4                   | 788    | 88505  | 6.1 | Fibroblast growth factor receptor 2 precursor (EC 2.7.10.1) (FGFR-2) (keratiocyte growth factor receptor 2) (CD332 antigen). |
| 2734 | Q1KHY5           | 2                    | 9              | 2.4                   | 785    | 88181  | 6   | Fibroblast growth factor receptor 2                                                                                          |
| 2734 | P21802           | 2                    | 9              | 2.3                   | 821    | 92025  | 5.9 | Fibroblast growth factor receptor 2 precursor                                                                                |
| 2734 | UPI0000D60FE9    | 2                    | 9              | 2.3                   | 821    | 92035  | 5.9 | Fibroblast growth factor receptor 2 precursor (EC 2.7.10.1) (FGFR-2) (keratiocyte growth factor receptor 2) (CD332 antigen). |
| 2734 | UPI0000D60FE7    | 2                    | 9              | 2.3                   | 822    | 92128  | 6   | Fibroblast growth factor receptor 2 precursor (EC 2.7.10.1) (FGFR-2) (keratiocyte growth factor receptor 2) (CD332 antigen). |
| 2734 | UPI0000D60FE6    | 2                    | 9              | 2.3                   | 819    | 91536  | 6.3 | Fibroblast growth factor receptor 2 precursor (EC 2.7.10.1) (FGFR-2) (keratiocyte growth factor receptor 2) (CD332 antigen). |
| 2734 | P21802-9         | 2                    | 9              | 2.3                   | 819    | 91566  | 6.3 | Isoform 9 of P21802                                                                                                          |
| 2734 | P21802-7         | 2                    | 9              | 2.3                   | 817    | 91620  | 7.1 | Isoform 7 of P21802                                                                                                          |
| 2734 | P21802-5         | 2                    | 9              | 2.3                   | 819    | 91825  | 5.9 | Isoform 5 of P21802                                                                                                          |
| 2734 | P21802-3         | 2                    | 9              | 2.3                   | 822    | 92118  | 6   | Isoform 3 of P21802                                                                                                          |
| 2734 | P21802-18        | 2                    | 9              | 2.3                   | 820    | 91918  | 6   | Isoform 18 of P21802                                                                                                         |
| 2734 | P21802-16        | 2                    | 9              | 2.3                   | 822    | 92165  | 6   | Isoform 16 of P21802                                                                                                         |
| 2734 | P21802-11        | 2                    | 9              | 2.3                   | 830    | 92733  | 6.9 | Isoform 11 of P21802                                                                                                         |
| 2734 | P21802-10        | 2                    | 9              | 2.3                   | 819    | 91641  | 6.5 | Isoform 10 of P21802                                                                                                         |
| 2735 | Q69YM3           | 2                    | 2              | 2.5                   | 651    | 68890  | 9.1 | Hypothetical protein DKFZp762H2012                                                                                           |
| 2735 | Q13207           | 2                    | 2              | 2.3                   | 702    | 74068  | 9.1 | T-box transcription factor TBX2                                                                                              |
| 2736 | UPI00004572D4    | 2                    | 3              | 5.1                   | 408    | 46390  | 8.6 | PR domain zinc finger protein 9 (PR domain-containing protein 9).                                                            |
| 2736 | UPI00004572D5    | 2                    | 3              | 3                     | 695    | 80062  | 9.3 | PR domain zinc finger protein 9 (PR domain-containing protein 9).                                                            |
| 2736 | Q9NQV7           | 2                    | 3              | 3                     | 689    | 79475  | 9.3 | PR domain zinc finger protein 9                                                                                              |
| 2736 | Q27Q50           | 2                    | 3              | 2.3                   | 894    | 103377 | 9.2 | PR domain-containing 9                                                                                                       |
| 2737 | Q2TAM4           | 2                    | 2              | 2.3                   | 952    | 107812 | 7.7 | POLR1B protein                                                                                                               |
| 2737 | Q9H9Y6-2         | 2                    | 2              | 2                     | 1079   | 121988 | 7.6 | Isoform 2 of Q9H9Y6                                                                                                          |
| 2737 | Q9H9Y6           | 2                    | 2              | 1.9                   | 1135   | 128229 | 7.8 | DNA-directed RNA polymerase I 135 kDa polypeptide                                                                            |
| 2738 | Q5JSZ5           | 2                    | 2              | 2.3                   | 1535   | 165526 | 8.8 | Uncharacterized protein KIAA0515                                                                                             |
| 2739 | Q96AP3           | 2                    | 2              | 3.8                   | 532    | 59372  | 9.1 | CC2D1B protein                                                                                                               |
| 2739 | Q5T0G1           | 2                    | 2              | 3.2                   | 627    | 69549  | 8.6 | Coiled-coil and C2 domain containing 1B                                                                                      |

| No.  | Accession Number | Unique Peptide Count | Spectrum Count | Sequence Coverage (%) | Length | MolWt  | pI  | Descriptive Name                                                                                                                                                                               |
|------|------------------|----------------------|----------------|-----------------------|--------|--------|-----|------------------------------------------------------------------------------------------------------------------------------------------------------------------------------------------------|
| 2739 | Q5T0G0           | 2                    | 2              | 2.6                   | 771    | 85030  | 5.6 | Coiled-coil and C2 domain containing 1B                                                                                                                                                        |
| 2739 | Q5T0F8           | 2                    | 2              | 2.3                   | 852    | 93595  | 5.2 | Coiled-coil and C2 domain containing 1B                                                                                                                                                        |
| 2739 | Q5T0F9           | 2                    | 2              | 2.3                   | 858    | 94224  | 5.3 | Coiled-coil and C2 domain-containing protein 1B                                                                                                                                                |
| 2740 | Q9H6M7           | 2                    | 2              | 3.5                   | 774    | 84408  | 7.6 | CDNA: FLJ22087 fis, clone HEP15918                                                                                                                                                             |
| 2740 | Q9H6B3           | 2                    | 2              | 3.5                   | 774    | 84378  | 7.6 | CDNA: FLJ22417 fis, clone HRC08579                                                                                                                                                             |
| 2740 | Q8TDM9           | 2                    | 2              | 2.7                   | 1013   | 110352 | 7.3 | Amplified in breast cancer 1                                                                                                                                                                   |
| 2740 | Q6AI08           | 2                    | 2              | 2.3                   | 1181   | 128781 | 7   | Hypothetical protein DKFZp686D22141                                                                                                                                                            |
| 2740 | Q6MZX1           | 2                    | 2              | 2.3                   | 1181   | 128707 | 7.1 | Hypothetical protein DKFZp686B03209                                                                                                                                                            |
| 2741 | Q6NUQ2           | 2                    | 7              | 2.3                   | 1002   | 111640 | 4.9 | Calmin                                                                                                                                                                                         |
| 2741 | Q96JQ2           | 2                    | 7              | 2.3                   | 1002   | 111651 | 4.9 | Calmin                                                                                                                                                                                         |
| 2742 | Q86VQ0           | 2                    | 2              | 2.3                   | 697    | 80554  | 7.7 | Uncharacterized protein C6orf152                                                                                                                                                               |
| 2742 | UPI00001907F9    | 2                    | 2              | 2.3                   | 697    | 80530  | 7.7 | hypothetical protein LOC167691                                                                                                                                                                 |
| 2743 | Q8NEE8           | 2                    | 2              | 2.3                   | 873    | 98309  | 9   | Tetratricopeptide repeat protein 16                                                                                                                                                            |
| 2744 | A1L3A9           | 2                    | 6              | 2.2                   | 1232   | 138540 | 5.3 | TBC1 domain family, member 9B                                                                                                                                                                  |
| 2744 | UPI000034ECFF    | 2                    | 6              | 2.2                   | 1250   | 140525 | 5.3 | TBC1 domain family, member 9B (with GRAM domain) isoform a                                                                                                                                     |
| 2744 | UPI000020CCFB    | 2                    | 6              | 2.2                   | 1233   | 138670 | 5.3 | TBC1 domain family, member 9B (with GRAM domain) isoform b                                                                                                                                     |
| 2744 | UPI000013D22E    | 2                    | 6              | 2.1                   | 1261   | 141519 | 5.3 | TBC1 domain family, member 9B (with GRAM domain) isoform b                                                                                                                                     |
| 2744 | O75163           | 2                    | 6              | 2.1                   | 1262   | 141589 | 5.3 | TBC1 domain family member 9B                                                                                                                                                                   |
| 2745 | Q9Y6D9           | 2                    | 2              | 2.5                   | 718    | 83067  | 5.9 | Mitotic spindle assembly checkpoint protein MAD1                                                                                                                                               |
| 2745 | A4D218           | 2                    | 2              | 2.2                   | 803    | 91721  | 8.1 | MAD1 mitotic arrest deficient-like 1                                                                                                                                                           |
| 2745 | UPI0000140415    | 2                    | 2              | 2.2                   | 803    | 91771  | 8.1 | Mitotic spindle assembly checkpoint protein MAD1 (Mitotic arrest deficient-like protein 1) (MAD1-like 1) (Mitotic checkpoint MAD1 protein-homolog) (HsMAD1) (hMAD1) (Tax-binding protein 181). |
| 2745 | Q9Y6D9-2         | 2                    | 2              | 2.2                   | 804    | 91859  | 8.1 | Isoform 2 of Q9Y6D9                                                                                                                                                                            |
| 2746 | P19838           | 2                    | 2              | 2.2                   | 968    | 105356 | 5.4 | Nuclear factor NF-kappa-B p105 subunit (DNA-binding factor KBF1) (EBP- 1) [Contains: Nuclear factor NF-kappa-B p50 subunit]                                                                    |
| 2746 | P19838-2         | 2                    | 2              | 2.2                   | 969    | 105427 | 5.4 | Isoform 2 of P19838                                                                                                                                                                            |
| 2747 | P49916-2         | 2                    | 2              | 2.3                   | 862    | 95802  | 9   | Isoform Beta of P49916                                                                                                                                                                         |
| 2747 | P49916           | 2                    | 2              | 2.2                   | 922    | 102691 | 8.8 | DNA ligase 3                                                                                                                                                                                   |
| 2748 | Q86V48-3         | 2                    | 2              | 2.3                   | 1053   | 117555 | 8.9 | Isoform 3 of Q86V48                                                                                                                                                                            |
| 2748 | Q86V48-2         | 2                    | 2              | 2.3                   | 1026   | 114588 | 8.9 | Isoform 2 of Q86V48                                                                                                                                                                            |
| 2748 | Q86V48           | 2                    | 2              | 2.2                   | 1076   | 120275 | 8.5 | Leucine zipper protein 1                                                                                                                                                                       |
| 2748 | UPI0000445E0E    | 2                    | 2              | 2.2                   | 1076   | 120304 | 8.6 | leucine zipper protein 1                                                                                                                                                                       |
| 2749 | UPI0000457488    | 2                    | 5              | 2.4                   | 981    | 108579 | 6.5 | NEDD9-interacting protein with calponin homology and LIM domains (Molecule interacting with CasL protein 1).                                                                                   |

| No.  | Accession Number | Unique Peptide Count | Spectrum Count | Sequence Coverage (%) | Length | MolWt  | pI  | Descriptive Name                                                                                                                                              |
|------|------------------|----------------------|----------------|-----------------------|--------|--------|-----|---------------------------------------------------------------------------------------------------------------------------------------------------------------|
| 2749 | Q8TDZ2-2         | 2                    | 5              | 2.4                   | 981    | 108552 | 6.5 | Isoform 2 of Q8TDZ2                                                                                                                                           |
| 2749 | Q8TDZ2           | 2                    | 5              | 2.2                   | 1067   | 117875 | 6.4 | NEDD9-interacting protein with calponin homology and LIM domains                                                                                              |
| 2749 | UPI0000457487    | 2                    | 5              | 2.2                   | 1067   | 117902 | 6.4 | NEDD9-interacting protein with calponin homology and LIM domains (Molecule interacting with CasL protein 1).                                                  |
| 2749 | UPI000012F0E5    | 2                    | 5              | 2.2                   | 1067   | 117932 | 6.5 | microtubule associated monooxygenase, calponin and LIM domain containing 1                                                                                    |
| 2750 | Q8WXD9           | 2                    | 12             | 2.2                   | 1431   | 149813 | 9.1 | Caskin-1                                                                                                                                                      |
| 2750 | UPI00004568FC    | 2                    | 12             | 2.2                   | 1432   | 149857 | 9.2 | Caskin-1 (CASK-interacting protein 1).                                                                                                                        |
| 2751 | Q9H165           | 2                    | 2              | 2.2                   | 835    | 91197  | 6.6 | B-cell lymphoma/leukemia 11A                                                                                                                                  |
| 2751 | Q9H165-6         | 2                    | 2              | 2.2                   | 801    | 87554  | 6.5 | Isoform 6 of Q9H165                                                                                                                                           |
| 2752 | O75762           | 2                    | 2              | 2.1                   | 1119   | 127379 | 7   | Transient receptor potential cation channel subfamily A member 1                                                                                              |
| 2752 | UPI00004576B7    | 2                    | 2              | 2.1                   | 1117   | 127274 | 7.1 | Transient receptor potential cation channel subfamily A member 1 (Ankyrin-like with transmembrane domains protein 1) (Transformation sensitive-protein p120). |
| 2752 | UPI000021081A    | 2                    | 2              | 2.1                   | 1119   | 127501 | 7.1 | ankyrin-like protein 1                                                                                                                                        |
| 2753 | Q17RV9           | 2                    | 2              | 2.1                   | 1291   | 149769 | 6.1 | KIF15 protein                                                                                                                                                 |
| 2753 | Q9NS87           | 2                    | 2              | 1.9                   | 1388   | 160159 | 6   | Kinesin-like protein KIF15                                                                                                                                    |
| 2754 | Q641R2           | 2                    | 5              | 2.6                   | 728    | 82554  | 7.1 | OSBPL8 protein                                                                                                                                                |
| 2754 | UPI0000130E99    | 2                    | 5              | 2.2                   | 847    | 96956  | 7.5 | oxysterol-binding protein-like protein 8 isoform b                                                                                                            |
| 2754 | Q9BZF1-2         | 2                    | 5              | 2.2                   | 874    | 99714  | 7.1 | Isoform 2 of Q9BZF1                                                                                                                                           |
| 2754 | Q68D75           | 2                    | 5              | 2.2                   | 847    | 96924  | 7.5 | Oxysterol-binding protein                                                                                                                                     |
| 2754 | Q5HYM3           | 2                    | 5              | 2.1                   | 890    | 101298 | 7.1 | Oxysterol-binding protein                                                                                                                                     |
| 2754 | Q9BZF1           | 2                    | 5              | 2.1                   | 889    | 101196 | 7   | Oxysterol-binding protein-related protein 8                                                                                                                   |
| 2755 | Q7L590           | 2                    | 4              | 2.1                   | 875    | 98183  | 8.8 | Protein MCM10 homolog                                                                                                                                         |
| 2756 | Q9H7N4           | 2                    | 2              | 2.1                   | 1343   | 142483 | 9.4 | FLJ00034 protein                                                                                                                                              |
| 2756 | Q9NR59           | 2                    | 2              | 2.1                   | 1312   | 139269 | 9.2 | Ser/arg-rich pre-mRNA splicing factor SR-A1                                                                                                                   |
| 2757 | Q9Y6X7           | 2                    | 2              | 2.1                   | 1402   | 158411 | 5.1 | KIAA0864 protein                                                                                                                                              |
| 2757 | UPI000013F560    | 2                    | 2              | 2.1                   | 1402   | 158412 | 5.1 | Myosin phosphatase Rho-interacting protein (Rho-interacting protein 3) (M-RIP) (RIP3) (p116Rip).                                                              |
| 2758 | Q5TAX2           | 2                    | 23             | 3.6                   | 907    | 102314 | 6.3 | Zinc finger, CCHC domain containing 11                                                                                                                        |
| 2758 | A2RRP0           | 2                    | 23             | 2                     | 1645   | 185251 | 8   | Zinc finger, CCHC domain containing 11                                                                                                                        |
| 2758 | UPI000016057B    | 2                    | 23             | 2                     | 1640   | 184704 | 8   | zinc finger, CCHC domain containing 11 isoform c                                                                                                              |
| 2758 | Q5TAX3           | 2                    | 23             | 2                     | 1644   | 185164 | 8   | Zinc finger CCHC domain-containing protein 11                                                                                                                 |
| 2759 | Q53TS3           | 2                    | 2              | 2.4                   | 808    | 91286  | 5.4 | Hypothetical protein NRP2                                                                                                                                     |
| 2759 | UPI0000456EDD    | 2                    | 2              | 2.1                   | 901    | 101497 | 5.6 | Neuropilin-2 precursor (Vascular endothelial cell growth factor 165 receptor 2).                                                                              |
| 2759 | UPI0000456EDC    | 2                    | 2              | 2.1                   | 909    | 102231 | 5.3 | Neuropilin-2 precursor (Vascular endothelial cell growth factor 165 receptor 2).                                                                              |
| 2759 | UPI0000456EDB    | 2                    | 2              | 2.1                   | 926    | 104304 | 5.2 | Neuropilin-2 precursor (Vascular endothelial cell growth factor 165 receptor 2).                                                                              |

| No.  | Accession Number | Unique Peptide Count | Spectrum Count | Sequence Coverage (%) | Length | MolWt  | pI  | Descriptive Name                                                                                                                                                                                                                                                 |
|------|------------------|----------------------|----------------|-----------------------|--------|--------|-----|------------------------------------------------------------------------------------------------------------------------------------------------------------------------------------------------------------------------------------------------------------------|
| 2759 | UPI0000140230    | 2                    | 2              | 2.1                   | 906    | 101985 | 5.6 | Neuropilin-2 precursor (Vascular endothelial cell growth factor 165 receptor 2).                                                                                                                                                                                 |
| 2759 | Q9H2E4           | 2                    | 2              | 2.1                   | 901    | 101380 | 5.8 | Neuropilin-2b                                                                                                                                                                                                                                                    |
| 2759 | Q9H2E3           | 2                    | 2              | 2.1                   | 906    | 101956 | 5.8 | Neuropilin-2b                                                                                                                                                                                                                                                    |
| 2759 | Q9H2D5           | 2                    | 2              | 2.1                   | 901    | 101381 | 5.6 | Neuropilin-2b                                                                                                                                                                                                                                                    |
| 2759 | Q9H2D4           | 2                    | 2              | 2.1                   | 906    | 101957 | 5.6 | Neuropilin-2b                                                                                                                                                                                                                                                    |
| 2759 | Q7LBX6           | 2                    | 2              | 2.1                   | 926    | 104255 | 5.2 | Neuropilin-2a                                                                                                                                                                                                                                                    |
| 2759 | O60462-2         | 2                    | 2              | 2.1                   | 909    | 102215 | 5.3 | Isoform A0 of O60462                                                                                                                                                                                                                                             |
| 2759 | O60462           | 2                    | 2              | 2                     | 931    | 104831 | 5.2 | Neuropilin-2 precursor                                                                                                                                                                                                                                           |
| 2759 | UPI000014020F    | 2                    | 2              | 2                     | 931    | 104859 | 5.2 | Neuropilin-2 precursor (Vascular endothelial cell growth factor 165 receptor 2).                                                                                                                                                                                 |
| 2760 | Q5TER5           | 2                    | 3              | 2.1                   | 860    | 98089  | 8.4 | Exosome component 10                                                                                                                                                                                                                                             |
| 2760 | Q01780           | 2                    | 3              | 2                     | 885    | 100831 | 8.5 | Exosome component 10                                                                                                                                                                                                                                             |
| 2761 | Q05481           | 2                    | 3              | 2                     | 1191   | 137226 | 9.3 | Zinc finger protein 91                                                                                                                                                                                                                                           |
| 2761 | UPI00002038F9    | 2                    | 3              | 2                     | 1191   | 137217 | 9.3 | zinc finger protein 91                                                                                                                                                                                                                                           |
| 2762 | Q96QC0           | 2                    | 5              | 2                     | 940    | 99058  | 9.2 | Serine/threonine-protein phosphatase 1 regulatory subunit 10                                                                                                                                                                                                     |
| 2763 | O75151           | 2                    | 2              | 1.9                   | 1101   | 121232 | 9.2 | PHD finger protein 2                                                                                                                                                                                                                                             |
| 2763 | UPI0000D618C2    | 2                    | 2              | 1.9                   | 1095   | 120501 | 9.4 | PHD finger protein 2 (GRC5).                                                                                                                                                                                                                                     |
| 2763 | Q4VXB9           | 2                    | 2              | 1.9                   | 1096   | 120775 | 9.2 | PHD finger protein 2                                                                                                                                                                                                                                             |
| 2764 | Q3LIC4           | 2                    | 2              | 1.9                   | 1072   | 118427 | 8.7 | Hypothetical protein Nbla00003                                                                                                                                                                                                                                   |
| 2764 | Q7Z3K3-3         | 2                    | 2              | 1.5                   | 1366   | 151213 | 7.3 | Isoform 3 of Q7Z3K3                                                                                                                                                                                                                                              |
| 2764 | Q7Z3K3-2         | 2                    | 2              | 1.5                   | 1357   | 150129 | 7.3 | Isoform 2 of Q7Z3K3                                                                                                                                                                                                                                              |
| 2764 | Q5SZS1           | 2                    | 2              | 1.5                   | 1315   | 145295 | 7.2 | Pogo transposable element with ZNF domain                                                                                                                                                                                                                        |
| 2764 | Q7Z3K3           | 2                    | 2              | 1.4                   | 1410   | 155343 | 7.4 | Pogo transposable element with ZNF domain                                                                                                                                                                                                                        |
| 2765 | Q59G54           | 2                    | 2              | 1.9                   | 1188   | 136621 | 6   | Bromodomain adjacent to zinc finger domain, 1A isoform b variant                                                                                                                                                                                                 |
| 2765 | UPI0000D623EF    | 2                    | 2              | 1.4                   | 1525   | 175440 | 6.9 | Bromodomain adjacent to zinc finger domain protein 1A (ATP-utilizing chromatin assembly and remodeling factor 1) (hACF1) (ATP-dependent chromatin remodelling protein) (Williams syndrome transcription factor-related chromatin-remodeling factor 180) (WCRF18) |
| 2765 | UPI0000D623EE    | 2                    | 2              | 1.4                   | 1557   | 178758 | 6.6 | Bromodomain adjacent to zinc finger domain protein 1A (ATP-utilizing chromatin assembly and remodeling factor 1) (hACF1) (ATP-dependent chromatin remodelling protein) (Williams syndrome transcription factor-related chromatin-remodeling factor 180) (WCRF18) |
| 2765 | Q9NRL2-2         | 2                    | 2              | 1.4                   | 1524   | 175384 | 6.8 | Isoform 2 of Q9NRL2                                                                                                                                                                                                                                              |
| 2765 | Q9NRL2           | 2                    | 2              | 1.4                   | 1556   | 178702 | 6.6 | Bromodomain adjacent to zinc finger domain protein 1A                                                                                                                                                                                                            |
| 2766 | Q6PJM4           | 2                    | 2              | 2.6                   | 915    | 105772 | 8.1 | ZNFX1 protein                                                                                                                                                                                                                                                    |
| 2766 | Q5JXR6           | 2                    | 2              | 1.9                   | 1270   | 146226 | 8.4 | Zinc finger, NFX1-type containing 1                                                                                                                                                                                                                              |
| 2766 | Q9P2E3           | 2                    | 2              | 1.3                   | 1918   | 220225 | 7.3 | NFX1-type zinc finger-containing protein 1                                                                                                                                                                                                                       |
| 2767 | Q6DD85           | 2                    | 2              | 3.6                   | 662    | 74085  | 4.8 | FKBP15 protein                                                                                                                                                                                                                                                   |
| 2767 | Q5T1M5           | 2                    | 2              | 1.9                   | 1244   | 136273 | 5.2 | FK506-binding protein 15                                                                                                                                                                                                                                         |
| 2767 | Q9Y4D0           | 2                    | 2              | 1.9                   | 1234   | 135179 | 5.2 | KIAA0674 protein                                                                                                                                                                                                                                                 |

| No.  | Accession Number | Unique Peptide Count | Spectrum Count | Sequence Coverage (%) | Length | MolWt  | pI  | Descriptive Name                                                                                 |
|------|------------------|----------------------|----------------|-----------------------|--------|--------|-----|--------------------------------------------------------------------------------------------------|
| 2767 | UPI0000DD7F7E    | 2                    | 2              | 1.8                   | 1342   | 146538 | 5.6 | PREDICTED: similar to Golgin subfamily A member 6 (Golgin linked to PML) (Golgin-like protein)   |
| 2768 | Q8IWR0           | 2                    | 2              | 1.9                   | 971    | 110538 | 7.3 | Zinc finger CCCH domain-containing protein 7A                                                    |
| 2769 | Q2NLD0           | 2                    | 5              | 2.1                   | 891    | 100275 | 6.6 | ATP9A protein                                                                                    |
| 2769 | O75110           | 2                    | 5              | 1.8                   | 1047   | 118582 | 7.8 | Probable phospholipid-transporting ATPase IIA                                                    |
| 2770 | O94909-2         | 2                    | 2              | 2.1                   | 989    | 109861 | 5.5 | Isoform 2 of O94909                                                                              |
| 2770 | O94909           | 2                    | 2              | 1.8                   | 1142   | 126526 | 5   | Uncharacterized protein KIAA0819                                                                 |
| 2771 | Q5TCZ1           | 2                    | 2              | 1.8                   | 1133   | 125289 | 8.9 | SH3 and PX domain-containing protein 2A                                                          |
| 2772 | Q86Y65           | 2                    | 7              | 3.3                   | 900    | 104487 | 5.2 | KIAA1529 protein                                                                                 |
| 2772 | Q5VV25           | 2                    | 7              | 1.8                   | 1646   | 191099 | 6   | KIAA1529                                                                                         |
| 2772 | UPI0000D618D4    | 2                    | 7              | 1.8                   | 1708   | 198116 | 6   | KIAA1529 (KIAA1529), mRNA                                                                        |
| 2772 | Q9P1Z9           | 2                    | 7              | 1.8                   | 1680   | 194698 | 6.1 | KIAA1529 protein                                                                                 |
| 2772 | Q68DP5           | 2                    | 7              | 1.8                   | 1708   | 198122 | 6   | Protein KIAA1529                                                                                 |
| 2773 | Q96FS4           | 2                    | 4              | 1.8                   | 1042   | 112149 | 6.6 | Signal-induced proliferation-associated protein 1                                                |
| 2773 | UPI0000163B1E    | 2                    | 4              | 1.8                   | 1042   | 112116 | 6.6 | signal-induced proliferation-associated protein 1                                                |
| 2774 | Q68DI5           | 2                    | 3              | 2.3                   | 983    | 111509 | 6.3 | Hypothetical protein DKFZp781H1425                                                               |
| 2774 | O95163           | 2                    | 3              | 1.7                   | 1332   | 150191 | 6   | Elongator complex protein 1                                                                      |
| 2774 | Q8N516           | 2                    | 3              | 1.7                   | 1332   | 150223 | 6   | Inhibitor of kappa light polypeptide gene enhancer in B-cells, kinase complex-associated protein |
| 2774 | Q4LE38           | 2                    | 3              | 1.7                   | 1342   | 151455 | 6   | IKBKAP variant protein                                                                           |
| 2775 | UPI0000D61533    | 2                    | 2              | 1.8                   | 1224   | 135907 | 6.5 | Uncharacterized protein C4orf8 (Protein IT14).                                                   |
| 2775 | P78312-2         | 2                    | 2              | 1.8                   | 1224   | 135964 | 6.5 | Isoform 2 of P78312                                                                              |
| 2775 | P78312           | 2                    | 2              | 1.7                   | 1265   | 139988 | 6.5 | Uncharacterized protein C4orf8                                                                   |
| 2775 | UPI0000D61532    | 2                    | 2              | 1.7                   | 1265   | 139972 | 6.5 | Uncharacterized protein C4orf8 (Protein IT14).                                                   |
| 2776 | Q14126           | 2                    | 4              | 1.7                   | 1117   | 122385 | 5.3 | Desmoglein-2 precursor                                                                           |
| 2776 | Q4KKU6           | 2                    | 4              | 1.7                   | 1118   | 122294 | 5.2 | Desmoglein 2                                                                                     |
| 2777 | UPI0000074057    | 2                    | 10             | 2                     | 1518   | 170600 | 8.3 | poly (ADP-ribose) polymerase family, member 14                                                   |
| 2777 | Q460N5-4         | 2                    | 10             | 2                     | 1517   | 170718 | 7.5 | Isoform 4 of Q460N5                                                                              |
| 2777 | Q460N5-2         | 2                    | 10             | 1.8                   | 1638   | 184342 | 7.9 | Isoform 2 of Q460N5                                                                              |
| 2777 | Q460N5           | 2                    | 10             | 1.7                   | 1720   | 193752 | 8   | Poly [ADP-ribose] polymerase 14                                                                  |
| 2778 | Q6ZV73           | 2                    | 10             | 1.7                   | 1430   | 160816 | 7   | FYVE, RhoGEF and PH domain-containing protein 6                                                  |
| 2778 | UPI00001C0A5D    | 2                    | 10             | 1.7                   | 1430   | 160825 | 7   | FYVE, RhoGEF and PH domain containing 6                                                          |
| 2779 | Q8TEQ6           | 2                    | 7              | 1.7                   | 1508   | 168560 | 6.6 | Gem-associated protein 5                                                                         |
| 2779 | UPI000020D072    | 2                    | 7              | 1.7                   | 1508   | 168589 | 6.6 | Gem-associated protein 5 (Gemin5).                                                               |
| 2780 | UPI0000D6160C    | 2                    | 2              | 2                     | 1192   | 138141 | 8   | Ribonuclease III (EC 3.1.26.3) (RNase III) (Drosha) (p241).                                      |
| 2780 | Q9NRR4-3         | 2                    | 2              | 2                     | 1192   | 138157 | 8   | Isoform 3 of Q9NRR4                                                                              |
| 2780 | Q9NRR4-2         | 2                    | 2              | 1.8                   | 1306   | 151296 | 7.6 | Isoform 2 of Q9NRR4                                                                              |
| 2780 | Q9NRR4           | 2                    | 2              | 1.7                   | 1374   | 159315 | 7.9 | Ribonuclease 3                                                                                   |
| 2780 | UPI000049E005    | 2                    | 2              | 1.7                   | 1373   | 159184 | 7.9 | Ribonuclease III (EC 3.1.26.3) (RNase III) (Drosha) (p241).                                      |
| 2780 | UPI0000163BD8    | 2                    | 2              | 1.7                   | 1374   | 159244 | 7.8 | ribonuclease III, nuclear                                                                        |
| 2781 | Q9UPX6           | 2                    | 3              | 1.7                   | 916    | 102993 | 7.3 | UPF0258 protein KIAA1024                                                                         |
| 2782 | A2RUB6           | 2                    | 2              | 1.6                   | 949    | 109526 | 8.3 | CCDC66 protein                                                                                   |
| 2783 | O14672           | 2                    | 2              | 1.6                   | 748    | 84142  | 7.8 | ADAM 10 precursor                                                                                |

| No.  | Accession Number | Unique Peptide Count | Spectrum Count | Sequence Coverage (%) | Length | MolWt  | pI  | Descriptive Name                                                            |
|------|------------------|----------------------|----------------|-----------------------|--------|--------|-----|-----------------------------------------------------------------------------|
| 2784 | O60266           | 2                    | 3              | 1.6                   | 1144   | 128960 | 6.6 | Adenylate cyclase type 3                                                    |
| 2784 | UPI0000052BD3    | 2                    | 3              | 1.6                   | 1144   | 128970 | 6.6 | adenylate cyclase 3                                                         |
| 2785 | O94913           | 2                    | 2              | 1.6                   | 1654   | 183980 | 8.9 | Pre-mRNA cleavage complex 2 protein Pcf11                                   |
| 2786 | Q6ZUT7           | 2                    | 2              | 1.6                   | 1281   | 145809 | 6.9 | CDNA FLJ43337 fis, clone NT2RI3007158                                       |
| 2786 | UPI0000D62441    | 2                    | 2              | 0.8                   | 2458   | 275431 | 6.3 | KIAA1409 (KIAA1409), mRNA                                                   |
| 2786 | UPI000059F076    | 2                    | 2              | 0.8                   | 2458   | 275473 | 6.3 | hypothetical protein LOC57578                                               |
| 2786 | UPI0000231CA2    | 2                    | 2              | 0.8                   | 2508   | 281190 | 6.3 | KIAA1409 (KIAA1409), mRNA                                                   |
| 2786 | Q9P2D8           | 2                    | 2              | 0.8                   | 2461   | 275484 | 6.3 | Protein KIAA1409                                                            |
| 2787 | Q8IZH2           | 2                    | 4              | 1.6                   | 1706   | 194106 | 7.2 | 5'-3' exoribonuclease 1                                                     |
| 2787 | UPI0000480180    | 2                    | 4              | 1.6                   | 1693   | 192713 | 7.3 | 5'''-3''' exoribonuclease 1 isoform b                                       |
| 2787 | Q8IZH2-2         | 2                    | 4              | 1.6                   | 1694   | 192842 | 7.3 | Isoform 2 of Q8IZH2                                                         |
| 2788 | Q8WXR4-3         | 2                    | 2              | 1.8                   | 1251   | 141339 | 7.6 | Isoform 3 of Q8WXR4                                                         |
| 2788 | UPI0000D61265    | 2                    | 2              | 1.7                   | 1314   | 148838 | 7.9 | Myosin IIIB (EC 2.7.11.1).                                                  |
| 2788 | UPI0000D61263    | 2                    | 2              | 1.7                   | 1278   | 144818 | 8.1 | Myosin IIIB (EC 2.7.11.1).                                                  |
| 2788 | UPI0000D61262    | 2                    | 2              | 1.7                   | 1275   | 144552 | 8.2 | Myosin IIIB (EC 2.7.11.1).                                                  |
| 2788 | UPI0000074403    | 2                    | 2              | 1.7                   | 1314   | 148590 | 7.7 | myosin IIIB isoform 1                                                       |
| 2788 | Q8WXR4-5         | 2                    | 2              | 1.7                   | 1275   | 144287 | 8.1 | Isoform 5 of Q8WXR4                                                         |
| 2788 | Q8WXR4-4         | 2                    | 2              | 1.7                   | 1314   | 148573 | 7.7 | Isoform 4 of Q8WXR4                                                         |
| 2788 | Q8WXR4-2         | 2                    | 2              | 1.7                   | 1278   | 144552 | 8   | Isoform 2 of Q8WXR4                                                         |
| 2788 | Q8WXR4           | 2                    | 2              | 1.6                   | 1341   | 151786 | 8.1 | Myosin-IIIB                                                                 |
| 2788 | UPI0000D61264    | 2                    | 2              | 1.6                   | 1341   | 152051 | 8.2 | Myosin IIIB (EC 2.7.11.1).                                                  |
| 2788 | UPI0000074402    | 2                    | 2              | 1.6                   | 1341   | 151803 | 8.1 | myosin IIIB isoform 2                                                       |
| 2788 | Q8WXR4-7         | 2                    | 2              | 1.6                   | 1350   | 152756 | 8.2 | Isoform 7 of Q8WXR4                                                         |
| 2789 | Q9Y2H0           | 2                    | 2              | 1.6                   | 989    | 107567 | 7.3 | Disks large-associated protein 4                                            |
| 2789 | Q9Y2H0-2         | 2                    | 2              | 1.6                   | 992    | 108012 | 7.1 | Isoform 2 of Q9Y2H0                                                         |
| 2790 | UPI0000DD7D5C    | 2                    | 3              | 1.6                   | 1977   | 209273 | 8.5 | PREDICTED: similar to NHS-like 1 isoform 1                                  |
| 2791 | Q96RT1-7         | 2                    | 2              | 1.6                   | 1302   | 146086 | 5.3 | Isoform 7 of Q96RT1                                                         |
| 2791 | Q96RT1-6         | 2                    | 2              | 1.6                   | 1340   | 150601 | 5.5 | Isoform 6 of Q96RT1                                                         |
| 2791 | Q96RT1-4         | 2                    | 2              | 1.6                   | 1346   | 151251 | 5.4 | Isoform 4 of Q96RT1                                                         |
| 2791 | A0AVR1           | 2                    | 2              | 1.5                   | 1371   | 153952 | 5.5 | ErbB2 interacting protein                                                   |
| 2791 | UPI0000D61630    | 2                    | 2              | 1.5                   | 1361   | 152723 | 5.4 | Protein LAP2 (ErbB2-interacting protein) (Erbin) (Densin-180-like protein). |
| 2791 | Q96RT1-5         | 2                    | 2              | 1.5                   | 1356   | 152290 | 5.4 | Isoform 5 of Q96RT1                                                         |
| 2791 | Q96RT1-3         | 2                    | 2              | 1.5                   | 1360   | 152652 | 5.4 | Isoform 3 of Q96RT1                                                         |
| 2791 | Q96RT1-2         | 2                    | 2              | 1.5                   | 1371   | 153926 | 5.5 | Isoform 2 of Q96RT1                                                         |
| 2791 | Q96RT1           | 2                    | 2              | 1.5                   | 1412   | 158297 | 5.5 | Protein LAP2                                                                |
| 2791 | Q1RMD0           | 2                    | 2              | 1.5                   | 1371   | 153788 | 5.5 | ErbB2 interacting protein                                                   |
| 2791 | Q1RMC9           | 2                    | 2              | 1.5                   | 1367   | 153515 | 5.5 | ERBB2IP protein                                                             |
| 2792 | A1LOS8           | 2                    | 8              | 1.5                   | 1132   | 129465 | 5.3 | CROCC protein                                                               |
| 2792 | A1LOS9           | 2                    | 8              | 1.5                   | 1132   | 129524 | 5.3 | CROCC protein                                                               |
| 2792 | Q5TZA0           | 2                    | 8              | 0.9                   | 1898   | 214564 | 5.5 | Ciliary rootlet coiled-coil, rootletin                                      |
| 2792 | UPI0000DBEEE1    | 2                    | 8              | 0.8                   | 2009   | 227616 | 5.6 | Rootletin (Ciliary rootlet coiled-coil protein).                            |
| 2792 | UPI000042B0BB    | 2                    | 8              | 0.8                   | 2017   | 228422 | 5.5 | ciliary rootlet coiled-coil, rootletin                                      |
| 2792 | Q5TZA2           | 2                    | 8              | 0.8                   | 2017   | 228521 | 5.5 | Rootletin                                                                   |
| 2793 | UPI000045728B    | 2                    | 3              | 1.6                   | 1386   | 154670 | 6.8 | KIAA0922 (KIAA0922), mRNA                                                   |
| 2793 | Q86Y92           | 2                    | 3              | 1.6                   | 1387   | 154717 | 6.8 | Protein KIAA0922                                                            |
| 2793 | A2VDJ0           | 2                    | 3              | 1.5                   | 1461   | 163446 | 7.1 | KIAA0922                                                                    |
| 2793 | UPI00001D1AD9    | 2                    | 3              | 1.5                   | 1462   | 163517 | 7.1 | hypothetical protein LOC23240                                               |
| 2794 | O60885-2         | 2                    | 3              | 2.8                   | 722    | 80463  | 8.6 | Isoform 2 of O60885                                                         |
| 2794 | Q4G0X8           | 2                    | 3              | 2.5                   | 794    | 88289  | 8.4 | BRD4 protein                                                                |
| 2794 | O60885           | 2                    | 3              | 1.5                   | 1362   | 152218 | 9.2 | Bromodomain-containing protein 4                                            |
| 2794 | Q86YS8           | 2                    | 3              | 1.1                   | 1846   | 200087 | 6.4 | BRD4-NUT fusion oncoprotein                                                 |

| No.  | Accession Number | Unique Peptide Count | Spectrum Count | Sequence Coverage (%) | Length | MolWt  | pI  | Descriptive Name                                                                                                                                  |
|------|------------------|----------------------|----------------|-----------------------|--------|--------|-----|---------------------------------------------------------------------------------------------------------------------------------------------------|
| 2795 | UPI00004570A3    | 2                    | 6              | 2.8                   | 1007   | 111775 | 5.7 | SET-binding factor 1 (Sbf1) (Myotubularin-related protein 5).                                                                                     |
| 2795 | O95248-2         | 2                    | 6              | 2.8                   | 1007   | 111702 | 5.7 | Isoform 2 of O95248                                                                                                                               |
| 2795 | O95248           | 2                    | 6              | 1.5                   | 1866   | 208255 | 7.2 | SET-binding factor 1                                                                                                                              |
| 2795 | UPI0000D6217C    | 2                    | 6              | 1.5                   | 1893   | 211075 | 7.1 | SET-binding factor 1 (Sbf1) (Myotubularin-related protein 5).                                                                                     |
| 2795 | UPI00004570A2    | 2                    | 6              | 1.5                   | 1864   | 208137 | 7.2 | SET-binding factor 1 (Sbf1) (Myotubularin-related protein 5).                                                                                     |
| 2795 | O95248-4         | 2                    | 6              | 1.5                   | 1893   | 211047 | 7.1 | Isoform 4 of O95248                                                                                                                               |
| 2795 | O95248-3         | 2                    | 6              | 1.5                   | 1867   | 208313 | 6.9 | Isoform 3 of O95248                                                                                                                               |
| 2796 | UPI00004577B6    | 2                    | 6              | 1.6                   | 1638   | 182237 | 6.9 | nucleoporin 188kDa                                                                                                                                |
| 2796 | Q7Z3K8           | 2                    | 6              | 1.6                   | 1639   | 182478 | 6.9 | Hypothetical protein DKFZp686L1653                                                                                                                |
| 2796 | Q14675           | 2                    | 6              | 1.5                   | 1745   | 195697 | 6.7 | KIAA0169 protein                                                                                                                                  |
| 2796 | Q5SRE5           | 2                    | 6              | 1.5                   | 1749   | 196041 | 6.7 | 188 kDa nucleoporin                                                                                                                               |
| 2797 | Q504Q3           | 2                    | 3              | 1.5                   | 1202   | 135367 | 6   | PAB-dependent poly(A)-specific ribonuclease subunit 2                                                                                             |
| 2797 | UPI0000577D0A    | 2                    | 3              | 1.5                   | 1202   | 135367 | 6   | ubiquitin specific protease 52                                                                                                                    |
| 2797 | UPI00001AE7A6    | 2                    | 3              | 1.5                   | 1198   | 135008 | 5.9 | ubiquitin specific protease 52                                                                                                                    |
| 2797 | UPI000007464B    | 2                    | 3              | 1.5                   | 1198   | 135035 | 5.9 | ubiquitin specific protease 52                                                                                                                    |
| 2797 | Q504Q3-3         | 2                    | 3              | 1.5                   | 1201   | 135280 | 6   | Isoform 3 of Q504Q3                                                                                                                               |
| 2797 | Q504Q3-2         | 2                    | 3              | 1.5                   | 1198   | 135008 | 5.9 | Isoform 2 of Q504Q3                                                                                                                               |
| 2798 | Q92954-4         | 2                    | 2              | 1.7                   | 1270   | 136547 | 9.5 | Isoform D of Q92954                                                                                                                               |
| 2798 | Q92954-3         | 2                    | 2              | 1.6                   | 1311   | 141106 | 9.4 | Isoform C of Q92954                                                                                                                               |
| 2798 | Q92954           | 2                    | 2              | 1.5                   | 1404   | 151076 | 9.5 | Proteoglycan-4 precursor (Lubricin) (Megakaryocyte-stimulating factor) (Superficial zone proteoglycan) [Contains: Proteoglycan-4 C-terminal part] |
| 2798 | Q92954-6         | 2                    | 2              | 1.5                   | 1361   | 146467 | 9.5 | Isoform F of Q92954                                                                                                                               |
| 2798 | Q92954-2         | 2                    | 2              | 1.5                   | 1363   | 146517 | 9.6 | Isoform B of Q92954                                                                                                                               |
| 2799 | O15056-3         | 2                    | 2              | 1.6                   | 1288   | 143445 | 7.6 | Isoform 2A of O15056                                                                                                                              |
| 2799 | O15056           | 2                    | 2              | 1.4                   | 1496   | 165537 | 7.3 | Synaptojanin-2                                                                                                                                    |
| 2799 | UPI0000D61505    | 2                    | 2              | 1.4                   | 1451   | 160403 | 7.3 | Synaptojanin-2 (EC 3.1.3.36) (Synaptic inositol-1,4,5-trisphosphate 5- phosphatase 2).                                                            |
| 2799 | O15056-2         | 2                    | 2              | 1.4                   | 1451   | 160433 | 7.3 | Isoform 2B1 of O15056                                                                                                                             |
| 2800 | O95811           | 2                    | 7              | 1.4                   | 1580   | 179670 | 6.8 | Retinoblastoma binding protein 2 homolog 1                                                                                                        |
| 2800 | UPI00001AE68F    | 2                    | 7              | 1.4                   | 1580   | 179408 | 6.8 | Jumonji, AT rich interactive domain 1B (RBP2-like)                                                                                                |
| 2800 | Q9Y3Q5           | 2                    | 7              | 1.4                   | 1544   | 175657 | 6.7 | PLU-1 protein                                                                                                                                     |
| 2800 | UPI00001AE781    | 2                    | 7              | 1.3                   | 1680   | 190102 | 7.4 | Jumonji, AT rich interactive domain 1B (RBP2-like)                                                                                                |
| 2800 | Q9UGL1           | 2                    | 7              | 1.3                   | 1681   | 190118 | 7.4 | Jumonji/ARID domain-containing protein 1B                                                                                                         |
| 2801 | Q5VVH4           | 2                    | 4              | 1.4                   | 1821   | 206688 | 8.8 | Pleckstrin homology domain-interacting protein                                                                                                    |
| 2801 | Q8WWQ0           | 2                    | 4              | 1.4                   | 1821   | 206646 | 8.8 | WD repeat domain 11 protein                                                                                                                       |
| 2802 | UPI0000140BED    | 2                    | 4              | 1.8                   | 997    | 104697 | 9.7 | Nuclear factor related to kappa-B-binding protein (DNA-binding protein R kappa-B).                                                                |
| 2802 | Q6P4R8           | 2                    | 4              | 1.4                   | 1299   | 139001 | 9.2 | Nuclear factor related to kappa-B-binding protein                                                                                                 |
| 2802 | Q6P4R8-2         | 2                    | 4              | 1.4                   | 1324   | 141860 | 9   | Isoform 2 of Q6P4R8                                                                                                                               |
| 2803 | Q9P2M7           | 2                    | 2              | 1.4                   | 1197   | 136386 | 5.5 | Cingulin                                                                                                                                          |
| 2804 | Q5VW08           | 2                    | 2              | 2.3                   | 1039   | 116940 | 8.2 | OTTHUMP00000018324                                                                                                                                |
| 2804 | A3KMH1           | 2                    | 2              | 1.3                   | 1872   | 210922 | 7   | KIAA0564 protein                                                                                                                                  |

| No.  | Accession Number | Unique Peptide Count | Spectrum Count | Sequence Coverage (%) | Length | MolWt  | pI  | Descriptive Name                                                                                         |
|------|------------------|----------------------|----------------|-----------------------|--------|--------|-----|----------------------------------------------------------------------------------------------------------|
| 2804 | UPI00001606AC    | 2                    | 2              | 1.3                   | 1905   | 214823 | 7.4 | hypothetical protein LOC23078 isoform a                                                                  |
| 2805 | O60287           | 2                    | 3              | 1.3                   | 2248   | 252316 | 6.4 | Nucleolar preribosomal-associated protein 1                                                              |
| 2806 | Q5JPV5           | 2                    | 3              | 1.6                   | 1501   | 169350 | 6.3 | Myeloid/lymphoid or mixed-lineage leukemia (Trithorax homolog, Drosophila); translocated to, 4           |
| 2806 | UPI0000711FD9    | 2                    | 3              | 1.5                   | 1651   | 187671 | 6.5 | myeloid/lymphoid or mixed-lineage leukemia (trithorax homolog, Drosophila); translocated to, 4 isoform 2 |
| 2806 | Q5TIG7           | 2                    | 3              | 1.5                   | 1612   | 181998 | 6.5 | Myeloid/lymphoid or mixed-lineage leukemia (Trithorax homolog, Drosophila); translocated to, 4           |
| 2806 | Q59FP0           | 2                    | 3              | 1.5                   | 1639   | 186298 | 6.5 | Afadin variant                                                                                           |
| 2806 | P55196-2         | 2                    | 3              | 1.5                   | 1611   | 181899 | 6.5 | Isoform 1 of P55196                                                                                      |
| 2806 | UPI0000D61519    | 2                    | 3              | 1.4                   | 1665   | 189138 | 6.5 | Afadin (Protein AF-6).                                                                                   |
| 2806 | Q5TIG5           | 2                    | 3              | 1.4                   | 1665   | 189153 | 6.5 | Myeloid/lymphoid or mixed-lineage leukemia (Trithorax homolog, Drosophila); translocated to, 4           |
| 2806 | P55196-3         | 2                    | 3              | 1.4                   | 1743   | 197652 | 6.5 | Isoform 3 of P55196                                                                                      |
| 2806 | P55196           | 2                    | 3              | 1.3                   | 1816   | 205604 | 6.8 | Afadin                                                                                                   |
| 2806 | UPI0000D61518    | 2                    | 3              | 1.3                   | 1824   | 206788 | 6.5 | Afadin (Protein AF-6).                                                                                   |
| 2806 | UPI00004574E7    | 2                    | 3              | 1.3                   | 1816   | 205589 | 6.8 | Afadin (Protein AF-6).                                                                                   |
| 2806 | P55196-4         | 2                    | 3              | 1.3                   | 1824   | 206803 | 6.5 | Isoform 4 of P55196                                                                                      |
| 2807 | Q4G0A5           | 2                    | 3              | 2.1                   | 992    | 112857 | 7   | KIF14 protein                                                                                            |
| 2807 | Q14CI8           | 2                    | 3              | 1.3                   | 1648   | 186464 | 7.9 | Kinesin family member 14                                                                                 |
| 2807 | UPI00004562CC    | 2                    | 3              | 1.3                   | 1648   | 186615 | 7.9 | Kinesin-like protein KIF14.                                                                              |
| 2807 | Q15058           | 2                    | 3              | 1.3                   | 1648   | 186490 | 7.9 | Kinesin-like protein KIF14                                                                               |
| 2808 | Q9C0D5           | 2                    | 2              | 1.3                   | 1644   | 179425 | 8.4 | Tetratricopeptide repeat, ankyrin repeat and coiled-coil-containing protein 1                            |
| 2808 | UPI0000D61252    | 2                    | 2              | 1.2                   | 1861   | 202244 | 8.3 | TPR domain, ankyrin-repeat and coiled-coil-containing                                                    |
| 2808 | UPI00004B247A    | 2                    | 2              | 1.2                   | 1861   | 202191 | 8.3 | TPR domain, ankyrin-repeat and coiled-coil-containing                                                    |
| 2809 | Q9UHB7-2         | 2                    | 16             | 1.7                   | 900    | 98205  | 9.3 | Isoform 2 of Q9UHB7                                                                                      |
| 2809 | Q9UHB7           | 2                    | 16             | 1.3                   | 1163   | 127459 | 9.3 | AF4/FMR2 family member 4                                                                                 |
| 2810 | Q5T5E1           | 2                    | 2              | 1.5                   | 1206   | 134308 | 7.9 | Zinc finger, MYM-type 4                                                                                  |
| 2810 | A0JP20           | 2                    | 2              | 1.5                   | 1224   | 136344 | 8.1 | ZMYM4 protein                                                                                            |
| 2810 | O43308           | 2                    | 2              | 1.4                   | 1270   | 141148 | 8.1 | KIAA0425 protein                                                                                         |
| 2810 | Q7L3Q4           | 2                    | 2              | 1.3                   | 1434   | 160264 | 8   | ZMYM4 protein                                                                                            |
| 2810 | A0JP19           | 2                    | 2              | 1.2                   | 1516   | 169250 | 6.9 | ZMYM4 protein                                                                                            |
| 2810 | Q5VZL5           | 2                    | 2              | 1.2                   | 1548   | 172787 | 6.8 | Zinc finger MYM-type protein 4                                                                           |
| 2811 | Q2TAZ4           | 2                    | 7              | 3.3                   | 788    | 85874  | 5   | MDC1 protein                                                                                             |
| 2811 | UPI0000D6113B    | 2                    | 7              | 1.4                   | 1825   | 197569 | 5.7 | UPI0000D6113B UniRef100 entry                                                                            |
| 2811 | A2BF04           | 2                    | 7              | 1.2                   | 2089   | 226606 | 5.5 | Mediator of DNA damage checkpoint 1                                                                      |
| 2811 | UPI00004A3B34    | 2                    | 7              | 1.2                   | 2089   | 226636 | 5.5 | UPI00004A3B34 UniRef100 entry                                                                            |
| 2811 | Q14676           | 2                    | 7              | 1.2                   | 2089   | 226664 | 5.5 | Mediator of DNA damage checkpoint protein 1                                                              |
| 2811 | Q0EFC2           | 2                    | 7              | 1.2                   | 2089   | 226680 | 5.5 | KIAA0170 protein                                                                                         |
| 2812 | Q6DT37           | 2                    | 2              | 1.2                   | 1551   | 172517 | 6.3 | Serine/threonine-protein kinase MRCK gamma                                                               |



| No.  | Accession Number | Unique Peptide Count | Spectrum Count | Sequence Coverage (%) | Length | MolWt  | pI  | Descriptive Name                                                                                                                                                                                                                            |
|------|------------------|----------------------|----------------|-----------------------|--------|--------|-----|---------------------------------------------------------------------------------------------------------------------------------------------------------------------------------------------------------------------------------------------|
| 2812 | UPI000047C9E2    | 2                    | 2              | 1.2                   | 1551   | 172458 | 6.3 | Serine/threonine-protein kinase MRCK gamma (EC 2.7.11.1) (CDC42-binding protein kinase gamma) (Myotonic dystrophy kinase-related CDC42-binding kinase gamma) (Myotonic dystrophy protein kinase-like alpha) (MRCK gamma) (DMPK-like gamma). |
| 2813 | Q96Q89-4         | 2                    | 4              | 1.3                   | 1722   | 199862 | 5.2 | Isoform 4 of Q96Q89                                                                                                                                                                                                                         |
| 2813 | Q96Q89           | 2                    | 4              | 1.2                   | 1820   | 210681 | 5.7 | M-phase phosphoprotein 1                                                                                                                                                                                                                    |
| 2813 | UPI00001F9377    | 2                    | 4              | 1.2                   | 1780   | 206134 | 5.8 | M-phase phosphoprotein 1                                                                                                                                                                                                                    |
| 2813 | UPI000013D104    | 2                    | 4              | 1.2                   | 1820   | 210628 | 5.7 | M-phase phosphoprotein 1 (MPP1) (Kinesin-related motor interacting with PIN1).                                                                                                                                                              |
| 2813 | Q96Q89-3         | 2                    | 4              | 1.2                   | 1780   | 206187 | 5.8 | Isoform 3 of Q96Q89                                                                                                                                                                                                                         |
| 2813 | Q96Q89-2         | 2                    | 4              | 1.2                   | 1853   | 214327 | 5.9 | Isoform 2 of Q96Q89                                                                                                                                                                                                                         |
| 2814 | Q9P2K8           | 2                    | 2              | 1.2                   | 1649   | 186837 | 6.3 | Eukaryotic translation initiation factor 2-alpha kinase 4                                                                                                                                                                                   |
| 2814 | UPI0000160791    | 2                    | 2              | 1.2                   | 1649   | 186909 | 6.3 | eukaryotic translation initiation factor 2 alpha kinase 4                                                                                                                                                                                   |
| 2814 | Q9P2K8-2         | 2                    | 2              | 1.2                   | 1621   | 183644 | 6.5 | Isoform 2 of Q9P2K8                                                                                                                                                                                                                         |
| 2815 | A1YCA4           | 2                    | 2              | 1.1                   | 2154   | 231133 | 5.7 | SEC16L                                                                                                                                                                                                                                      |
| 2815 | O15027-3         | 2                    | 2              | 1.1                   | 2159   | 231249 | 5.6 | Isoform 3 of O15027                                                                                                                                                                                                                         |
| 2815 | O15027-2         | 2                    | 2              | 1.1                   | 2134   | 228868 | 5.6 | Isoform 2 of O15027                                                                                                                                                                                                                         |
| 2815 | O15027           | 2                    | 2              | 1.1                   | 2179   | 233515 | 5.6 | Uncharacterized protein KIAA0310                                                                                                                                                                                                            |
| 2816 | Q2VPJ7           | 2                    | 2              | 4                     | 657    | 73637  | 6.4 | NAG protein                                                                                                                                                                                                                                 |
| 2816 | A2RRP1           | 2                    | 2              | 1.1                   | 2371   | 268583 | 6   | Neuroblastoma-amplified protein                                                                                                                                                                                                             |
| 2816 | UPI00001AEA68    | 2                    | 2              | 1.1                   | 2371   | 268569 | 6   | neuroblastoma-amplified protein                                                                                                                                                                                                             |
| 2816 | Q8NFY8           | 2                    | 2              | 1.1                   | 2371   | 268466 | 5.9 | Neuroblastoma-amplified protein                                                                                                                                                                                                             |
| 2817 | Q3LIB1           | 2                    | 3              | 2.2                   | 905    | 103147 | 6.1 | Hypothetical protein Nbla00445                                                                                                                                                                                                              |
| 2817 | O15031           | 2                    | 3              | 1.1                   | 1838   | 205126 | 6.2 | Plexin-B2 precursor                                                                                                                                                                                                                         |
| 2817 | UPI00006C1B9B    | 2                    | 3              | 1.1                   | 1884   | 209692 | 6.5 | PREDICTED: similar to Plexin-B2 precursor (MM1)                                                                                                                                                                                             |
| 2818 | UPI0000D6255B    | 2                    | 2              | 1.5                   | 1339   | 135917 | 6.5 | Collagen alpha-1(XVIII) chain precursor [Contains: Endostatin].                                                                                                                                                                             |
| 2818 | UPI00004F6EDB    | 2                    | 2              | 1.5                   | 1336   | 135510 | 6.5 | alpha 1 type XVIII collagen isoform 2 precursor                                                                                                                                                                                             |
| 2818 | P39060-2         | 2                    | 2              | 1.5                   | 1339   | 135761 | 6.5 | Isoform 3 of P39060                                                                                                                                                                                                                         |
| 2818 | UPI0000D6255C    | 2                    | 2              | 1.4                   | 1476   | 150048 | 5.7 | Collagen alpha-1(XVIII) chain precursor [Contains: Endostatin].                                                                                                                                                                             |
| 2818 | UPI0000DB273B    | 2                    | 2              | 1.3                   | 1516   | 153767 | 5.7 | alpha 1 type XVIII collagen isoform 1 precursor                                                                                                                                                                                             |
| 2818 | P39060-1         | 2                    | 2              | 1.3                   | 1519   | 154018 | 5.7 | Isoform 2 of P39060                                                                                                                                                                                                                         |
| 2818 | P39060           | 2                    | 2              | 1.1                   | 1754   | 178159 | 6   | Collagen alpha-1(XVIII) chain precursor [Contains: Endostatin]                                                                                                                                                                              |
| 2818 | UPI0000D6255D    | 2                    | 2              | 1.1                   | 1755   | 178377 | 6.1 | Collagen alpha-1(XVIII) chain precursor [Contains: Endostatin].                                                                                                                                                                             |
| 2819 | P42345           | 2                    | 3              | 1.1                   | 2549   | 288890 | 7.2 | FKBP12-rapamycin complex-associated protein                                                                                                                                                                                                 |

| No.  | Accession Number | Unique Peptide Count | Spectrum Count | Sequence Coverage (%) | Length | MolWt  | pI  | Descriptive Name                                                                                                                                                                          |
|------|------------------|----------------------|----------------|-----------------------|--------|--------|-----|-------------------------------------------------------------------------------------------------------------------------------------------------------------------------------------------|
| 2819 | UPI000049DC6B    | 2                    | 3              | 1.1                   | 2551   | 289062 | 7.2 | FKBP12-rapamycin complex-associated protein (FK506-binding protein 12- rapamycin complex-associated protein 1) (Rapamycin target protein) (RAPT1) (Mammalian target of rapamycin) (mTOR). |
| 2819 | Q4LE76           | 2                    | 3              | 1                     | 2583   | 292863 | 7.6 | FRAP1 variant protein                                                                                                                                                                     |
| 2820 | Q14571           | 2                    | 3              | 1.1                   | 2701   | 308076 | 6.5 | Inositol 1,4,5-trisphosphate receptor type 2                                                                                                                                              |
| 2820 | UPI0000D621C2    | 2                    | 3              | 1.1                   | 2703   | 308290 | 6.4 | Inositol 1,4,5-trisphosphate receptor type 2 (Type 2 inositol 1,4,5- trisphosphate receptor) (Type 2 InsP3 receptor) (IP3 receptor isoform 2) (InsP3R2).                                  |
| 2820 | UPI00001FB7D2    | 2                    | 3              | 1.1                   | 2701   | 308062 | 6.4 | inositol 1,4,5-triphosphate receptor, type 2                                                                                                                                              |
| 2821 | UPI0000E4C8FD    | 2                    | 2              | 1.2                   | 1794   | 197398 | 6.5 | myosin light chain kinase isoform 3B                                                                                                                                                      |
| 2821 | Q15746-4         | 2                    | 2              | 1.2                   | 1794   | 197631 | 6.8 | Isoform 3B of Q15746                                                                                                                                                                      |
| 2821 | Q15746           | 2                    | 2              | 1.1                   | 1914   | 210772 | 6.2 | Myosin light chain kinase, smooth muscle                                                                                                                                                  |
| 2821 | UPI0000E4C8FC    | 2                    | 2              | 1.1                   | 1845   | 203054 | 6.2 | myosin light chain kinase isoform 2                                                                                                                                                       |
| 2821 | UPI0000D61B67    | 2                    | 2              | 1.1                   | 1842   | 202643 | 6.1 | Myosin light chain kinase, smooth muscle (EC 2.7.11.18) (MLCK) (Telokin) (Kinase-related protein) (KRP).                                                                                  |
| 2821 | UPI0000D61B66    | 2                    | 2              | 1.1                   | 1864   | 205349 | 6.8 | Myosin light chain kinase, smooth muscle (EC 2.7.11.18) (MLCK) (Telokin) (Kinase-related protein) (KRP).                                                                                  |
| 2821 | UPI0000457165    | 2                    | 2              | 1.1                   | 1845   | 203085 | 6.1 | Myosin light chain kinase, smooth muscle (EC 2.7.11.18) (MLCK) (Telokin) (Kinase-related protein) (KRP).                                                                                  |
| 2821 | UPI0000457163    | 2                    | 2              | 1.1                   | 1914   | 210744 | 6.1 | Myosin light chain kinase, smooth muscle (EC 2.7.11.18) (MLCK) (Telokin) (Kinase-related protein) (KRP).                                                                                  |
| 2821 | UPI000020A0AE    | 2                    | 2              | 1.1                   | 1914   | 210713 | 6.2 | myosin light chain kinase isoform 1                                                                                                                                                       |
| 2821 | UPI000013E30E    | 2                    | 2              | 1.1                   | 1863   | 205057 | 6.5 | myosin light chain kinase isoform 3A                                                                                                                                                      |
| 2821 | Q15746-6         | 2                    | 2              | 1.1                   | 1913   | 210643 | 6.2 | Isoform Del                                                                                                                                                                               |
| 2821 | Q15746-5         | 2                    | 2              | 1.1                   | 1841   | 202568 | 6.2 | Isoform 4 of Q15746                                                                                                                                                                       |
| 2821 | Q15746-3         | 2                    | 2              | 1.1                   | 1863   | 205277 | 6.8 | Isoform 3A of Q15746                                                                                                                                                                      |
| 2821 | Q15746-2         | 2                    | 2              | 1.1                   | 1845   | 203127 | 6.2 | Isoform 2 of Q15746                                                                                                                                                                       |
| 2822 | Q96J14           | 2                    | 20             | 1.1                   | 1778   | 200950 | 6.8 | KIAA1843 protein                                                                                                                                                                          |
| 2823 | Q9HCK1           | 2                    | 4              | 1.1                   | 1779   | 200909 | 6.3 | KIAA1571 protein                                                                                                                                                                          |
| 2824 | UPI00001FC8BF    | 2                    | 2              | 1.1                   | 1672   | 190329 | 5.5 | RING finger protein 17.                                                                                                                                                                   |
| 2825 | A0JP21           | 2                    | 2              | 1                     | 1770   | 198626 | 5.5 | KIF13A protein                                                                                                                                                                            |
| 2825 | UPI0000D613F5    | 2                    | 2              | 1                     | 1759   | 197274 | 5.6 | Kinesin-like protein KIF13A (Kinesin-like protein RBKIN).                                                                                                                                 |
| 2825 | UPI0000D613F4    | 2                    | 2              | 1                     | 1768   | 198431 | 5.5 | Kinesin-like protein KIF13A (Kinesin-like protein RBKIN).                                                                                                                                 |
| 2825 | UPI0000D613F3    | 2                    | 2              | 1                     | 1772   | 198816 | 5.5 | Kinesin-like protein KIF13A (Kinesin-like protein RBKIN).                                                                                                                                 |
| 2825 | UPI00004708ED    | 2                    | 2              | 1                     | 1768   | 198440 | 5.5 | Kinesin-like protein KIF13A (Kinesin-like protein RBKIN).                                                                                                                                 |
| 2825 | Q9H1H9-3         | 2                    | 2              | 1                     | 1749   | 196069 | 5.7 | Isoform 3 of Q9H1H9                                                                                                                                                                       |
| 2825 | A0JP22           | 2                    | 2              | 1                     | 1757   | 197084 | 5.6 | KIF13A protein                                                                                                                                                                            |
| 2825 | UPI00004708EC    | 2                    | 2              | 0.9                   | 1803   | 202121 | 5.6 | Kinesin-like protein KIF13A (Kinesin-like protein RBKIN).                                                                                                                                 |

| No.  | Accession Number | Unique Peptide Count | Spectrum Count | Sequence Coverage (%) | Length | MolWt  | pI  | Descriptive Name                                                           |
|------|------------------|----------------------|----------------|-----------------------|--------|--------|-----|----------------------------------------------------------------------------|
| 2825 | UPI00004573C6    | 2                    | 2              | 0.9                   | 1807   | 202497 | 5.6 | Kinesin-like protein KIF13A (Kinesin-like protein RBKIN).                  |
| 2825 | UPI000012DAD8    | 2                    | 2              | 0.9                   | 1805   | 202258 | 5.6 | kinesin family member 13A                                                  |
| 2825 | Q9H1H9           | 2                    | 2              | 0.9                   | 1805   | 202307 | 5.6 | Kinesin-like protein KIF13A                                                |
| 2826 | Q4LE74           | 2                    | 5              | 1.1                   | 2028   | 229712 | 8.6 | MYO9B variant protein                                                      |
| 2826 | Q13459-2         | 2                    | 5              | 1.1                   | 2023   | 229298 | 8.5 | Isoform Short of Q13459                                                    |
| 2826 | Q13459           | 2                    | 5              | 1                     | 2158   | 243555 | 8.7 | Myosin-IXb                                                                 |
| 2826 | UPI0000D61740    | 2                    | 5              | 1                     | 2157   | 243354 | 8.8 | Myosin-9B (Myosin IXb) (Unconventional myosin-9b).                         |
| 2826 | UPI00001B55A5    | 2                    | 5              | 1                     | 2157   | 243398 | 8.8 | myosin IXB                                                                 |
| 2827 | UPI000037848A    | 2                    | 2              | 1.2                   | 1851   | 203621 | 6.8 | sidekick 2                                                                 |
| 2827 | Q58EX2-2         | 2                    | 2              | 1.1                   | 1919   | 210903 | 7.1 | Isoform 2 of Q58EX2                                                        |
| 2827 | Q58EX2           | 2                    | 2              | 1                     | 2170   | 239118 | 7   | Protein sidekick-2 precursor                                               |
| 2827 | Q58EX2-4         | 2                    | 2              | 1                     | 2214   | 244092 | 7.1 | Isoform 4 of Q58EX2                                                        |
| 2827 | Q58EX2-3         | 2                    | 2              | 1                     | 2151   | 236894 | 7   | Isoform 3 of Q58EX2                                                        |
| 2828 | Q7Z3P7           | 2                    | 2              | 2                     | 1004   | 111594 | 8.7 | Hypothetical protein DKFZp686D219                                          |
| 2828 | Q8N3A2           | 2                    | 2              | 1.5                   | 1321   | 146863 | 6.9 | Hypothetical protein DKFZp761J031                                          |
| 2828 | Q5T5U3           | 2                    | 2              | 1                     | 1957   | 217329 | 7.8 | Rho GTPase-activating protein 21                                           |
| 2828 | Q9P2C3           | 2                    | 2              | 1                     | 1944   | 215997 | 7.8 | KIAA1424 protein                                                           |
| 2828 | Q8NI19           | 2                    | 2              | 1                     | 1957   | 217325 | 7.8 | Rho-GTPase activating protein 10                                           |
| 2829 | Q8IYT8           | 2                    | 2              | 1                     | 1036   | 112726 | 8.5 | Serine/threonine-protein kinase ULK2                                       |
| 2829 | UPI0000167B55    | 2                    | 2              | 1                     | 1036   | 112756 | 8.5 | unc-51-like kinase 2                                                       |
| 2829 | UPI000013D19B    | 2                    | 2              | 1                     | 1036   | 112694 | 8.5 | Serine/threonine-protein kinase ULK2 (EC 2.7.11.1) (Unc-51-like kinase 2). |
| 2830 | Q8WXQ5           | 2                    | 3              | 1                     | 993    | 108961 | 8.6 | Serine/threonine protein kinase kkiatre-like 1                             |
| 2831 | Q9ULI4           | 2                    | 2              | 1                     | 1840   | 190320 | 8.8 | Kinesin-like protein KIF26A                                                |
| 2832 | UPI0000DBEEC3    | 2                    | 2              | 1                     | 2122   | 236458 | 6.3 | CDNA FLJ46511 fis, clone THYMU3031868.                                     |
| 2832 | Q8N201           | 2                    | 2              | 1                     | 2190   | 244295 | 6.1 | Integrator complex subunit 1                                               |
| 2832 | A4D212           | 2                    | 2              | 0.9                   | 2394   | 265754 | 6.7 | DKFZP586J0619 protein                                                      |
| 2832 | UPI0000DD7DB8    | 2                    | 2              | 0.9                   | 2381   | 264069 | 6.6 | integrator complex subunit 1                                               |
| 2832 | A4D213           | 2                    | 2              | 0.9                   | 2408   | 266641 | 6.7 | DKFZP586J0619 protein                                                      |
| 2833 | Q5S007           | 2                    | 3              | 0.9                   | 2527   | 286055 | 6.8 | Leucine-rich repeat serine/threonine-protein kinase 2                      |
| 2834 | Q6Q759           | 2                    | 3              | 0.9                   | 2223   | 251739 | 6.2 | Sperm-associated antigen 17                                                |
| 2835 | Q9H2D6-5         | 2                    | 3              | 3.5                   | 593    | 68041  | 6.1 | Isoform 1 of Q9H2D6                                                        |
| 2835 | Q9H2D6           | 2                    | 3              | 0.9                   | 2365   | 261373 | 8.5 | TRIO and F-actin-binding protein                                           |
| 2835 | Q9H2D6-2         | 2                    | 3              | 0.9                   | 2267   | 250721 | 8.2 | Isoform 3 of Q9H2D6                                                        |
| 2836 | UPI000045890A    | 2                    | 2              | 0.9                   | 2884   | 315868 | 5.3 | Collagen alpha-1(XII) chain precursor.                                     |
| 2836 | Q5VYK1           | 2                    | 2              | 0.8                   | 3063   | 333147 | 5.5 | Collagen type XII alpha 1                                                  |
| 2836 | UPI0000457469    | 2                    | 2              | 0.8                   | 3063   | 333256 | 5.6 | Collagen alpha-1(XII) chain precursor.                                     |
| 2836 | Q99715           | 2                    | 2              | 0.8                   | 3063   | 333194 | 5.5 | Collagen alpha-1(XII) chain precursor                                      |
| 2837 | Q6V0I7           | 2                    | 4              | 0.8                   | 3222   | 351192 | 5.1 | FAT tumor suppressor homolog 4                                             |
| 2837 | UPI0000DB85F8    | 2                    | 4              | 0.5                   | 4924   | 536560 | 4.9 | FAT tumor suppressor homolog 4                                             |
| 2838 | Q96Q15-2         | 2                    | 2              | 0.9                   | 3521   | 395454 | 6.3 | Isoform 2 of Q96Q15                                                        |
| 2838 | Q96Q15           | 2                    | 2              | 0.8                   | 3657   | 410262 | 6.5 | Serine/threonine-protein kinase SMG1                                       |

| No.  | Accession Number | Unique Peptide Count | Spectrum Count | Sequence Coverage (%) | Length | MolWt  | pI  | Descriptive Name                                                                                                                                              |
|------|------------------|----------------------|----------------|-----------------------|--------|--------|-----|---------------------------------------------------------------------------------------------------------------------------------------------------------------|
| 2838 | UPI0000DBEEA7    | 2                    | 2              | 0.8                   | 3665   | 410958 | 6.5 | Serine/threonine-protein kinase SMG1 (EC 2.7.11.1) (SMG-1) (hSMG-1) (Lambda/iota protein kinase C-interacting protein) (Lambda-interacting protein) (61E3.4). |
| 2838 | UPI00004F8E22    | 2                    | 2              | 0.8                   | 3661   | 410501 | 6.5 | PI-3-kinase-related kinase SMG-1                                                                                                                              |
| 2839 | UPI00006C201C    | 2                    | 2              | 0.8                   | 4307   | 492627 | 6.5 | PREDICTED: similar to dynein, cytoplasmic, heavy chain 2 isoform 3                                                                                            |
| 2840 | P21359-4         | 2                    | 2              | 1.3                   | 1598   | 180212 | 7   | Isoform 4 of P21359                                                                                                                                           |
| 2840 | P21359           | 2                    | 2              | 0.7                   | 2839   | 319372 | 7.4 | Neurofibromin (Neurofibromatosis-related protein NF-1) [Contains: Neurofibromin truncated]                                                                    |
| 2840 | P21359-2         | 2                    | 2              | 0.7                   | 2818   | 317032 | 7.3 | Isoform 1 of P21359                                                                                                                                           |
| 2841 | Q5VUA4           | 2                    | 3              | 0.7                   | 2099   | 231993 | 6.4 | Zinc finger protein 318                                                                                                                                       |
| 2842 | P98161           | 2                    | 2              | 0.6                   | 4303   | 462573 | 6.7 | Polycystin-1 precursor                                                                                                                                        |
| 2842 | UPI00001B0454    | 2                    | 2              | 0.6                   | 4303   | 462534 | 6.7 | polycystin 1 isoform 1 precursor                                                                                                                              |
| 2842 | UPI0000156133    | 2                    | 2              | 0.6                   | 4302   | 462422 | 6.7 | polycystin 1 isoform 2 precursor                                                                                                                              |
| 2842 | P98161-3         | 2                    | 2              | 0.6                   | 4302   | 462445 | 6.7 | Isoform 3 of P98161                                                                                                                                           |
| 2842 | P98161-2         | 2                    | 2              | 0.6                   | 4292   | 461409 | 6.8 | Isoform 2 of P98161                                                                                                                                           |
| 2843 | UPI00006C1DAD    | 2                    | 2              | 0.8                   | 2011   | 229391 | 7.3 | PREDICTED: similar to ataxia telangiectasia and Rad3 related protein                                                                                          |
| 2843 | Q13535           | 2                    | 2              | 0.6                   | 2644   | 301365 | 7.4 | Serine/threonine-protein kinase ATR                                                                                                                           |
| 2843 | UPI0000DD7BC9    | 2                    | 2              | 0.6                   | 2612   | 298136 | 7.6 | PREDICTED: similar to Serine/threonine-protein kinase ATR (Ataxia telangiectasia and Rad3-related protein) (FRAP-related protein 1)                           |
| 2843 | UPI0000D61B87    | 2                    | 2              | 0.6                   | 2582   | 294417 | 7.5 | Serine/threonine-protein kinase ATR (EC 2.7.11.1) (Ataxia telangiectasia and Rad3-related protein) (FRAP-related protein 1).                                  |
| 2843 | UPI0000D61B86    | 2                    | 2              | 0.6                   | 2646   | 301564 | 7.5 | Serine/threonine-protein kinase ATR (EC 2.7.11.1) (Ataxia telangiectasia and Rad3-related protein) (FRAP-related protein 1).                                  |
| 2843 | UPI000002E542    | 2                    | 2              | 0.6                   | 2644   | 301450 | 7.5 | ataxia telangiectasia and Rad3 related protein                                                                                                                |
| 2843 | Q13535-2         | 2                    | 2              | 0.6                   | 2580   | 294217 | 7.4 | Isoform 2 of Q13535                                                                                                                                           |
| 2844 | P49454           | 2                    | 4              | 0.5                   | 3210   | 367595 | 5.1 | Centromere protein F                                                                                                                                          |
| 2844 | Q5VVM7           | 2                    | 4              | 0.5                   | 3114   | 357527 | 5.1 | Centromere protein F, 350/400ka                                                                                                                               |
| 2845 | Q5VT06           | 2                    | 2              | 0.5                   | 3117   | 350931 | 6.3 | Centrosome-associated protein 350                                                                                                                             |
| 2845 | UPI00004562B9    | 2                    | 2              | 0.5                   | 3117   | 351007 | 6.3 | Centrosome-associated protein 350 (Centrosome-associated protein of 350 kDa).                                                                                 |
| 2845 | UPI0000203C9B    | 2                    | 2              | 0.5                   | 3116   | 350860 | 6.3 | centrosome-associated protein 350                                                                                                                             |
| 2846 | Q9NR09           | 2                    | 3              | 0.5                   | 4829   | 527615 | 6   | Baculoviral IAP repeat-containing protein 6                                                                                                                   |
| 2846 | UPI0000DBEF4D    | 2                    | 3              | 0.5                   | 4829   | 527615 | 6   | Baculoviral IAP repeat-containing protein 6 (Ubiquitin-conjugating BIR domain enzyme apollon).                                                                |

| No.  | Accession Number | Unique Peptide Count | Spectrum Count | Sequence Coverage (%) | Length | MolWt  | pI  | Descriptive Name                                                                               |
|------|------------------|----------------------|----------------|-----------------------|--------|--------|-----|------------------------------------------------------------------------------------------------|
| 2846 | UPI00004EC29E    | 2                    | 3              | 0.5                   | 4829   | 527629 | 6   | baculoviral IAP repeat-containing 6                                                            |
| 2846 | UPI00004578FF    | 2                    | 3              | 0.5                   | 4829   | 527683 | 6.1 | Baculoviral IAP repeat-containing protein 6 (Ubiquitin-conjugating BIR domain enzyme apollon). |
| 2847 | P20929           | 2                    | 2              | 0.4                   | 6669   | 773230 | 9.1 | Nebulin                                                                                        |
| 2847 | UPI0000E445E4    | 2                    | 2              | 0.4                   | 6669   | 772918 | 9.1 | nebulin                                                                                        |
| 2847 | UPI0000D626AB    | 2                    | 2              | 0.4                   | 6669   | 772957 | 9.1 | Nebulin.                                                                                       |
| 2848 | Q96JB1           | 2                    | 5              | 0.4                   | 4490   | 514668 | 6.3 | Ciliary dynein heavy chain 8                                                                   |
| 2848 | UPI0000D626B6    | 2                    | 5              | 0.4                   | 4699   | 537743 | 6.2 | Ciliary dynein heavy chain 8 (Axonemal beta dynein heavy chain 8).                             |
| 2848 | Q96JB1-2         | 2                    | 5              | 0.4                   | 4454   | 510452 | 6.3 | Isoform 2 of Q96JB1                                                                            |
| 2849 | UPI0000141B94    | 2                    | 2              | 0.4                   | 4563   | 515611 | 7   | Apolipoprotein B-100 precursor (Apo B-100) [Contains: Apolipoprotein B-48 (Apo B-48)].         |
| 2849 | UPI0000D820D0    | 2                    | 2              | 0.4                   | 4563   | 515537 | 7   | apolipoprotein B precursor                                                                     |
| 2850 | UPI0000DD87BC    | 2                    | 6              | 0.4                   | 5048   | 534427 | 5.3 | PREDICTED: similar to AHNAK nucleoprotein isoform 1 isoform 1                                  |

**Supplemental Table 3.** Protein list of 3-D dataset

uniref100 database (May, 2007); DTASelect v1.9  
At least two unique peptide sequences

| No. | Accession Number | Unique Peptide Count | Spectrum Count | Sequence Coverage (%) | Length | MolWt  | pI  | Descriptive Name                                                                                                                                                                                                                                                |
|-----|------------------|----------------------|----------------|-----------------------|--------|--------|-----|-----------------------------------------------------------------------------------------------------------------------------------------------------------------------------------------------------------------------------------------------------------------|
| 1   | Q15149           | 229                  | 4235           | 52.6                  | 4684   | 531738 | 5.9 | Plectin-1                                                                                                                                                                                                                                                       |
| 1   | UPI0000457911    | 229                  | 4235           | 52.6                  | 4684   | 531668 | 5.9 | Plectin-1 (PLTN) (PCN) (Hemidesmosomal protein 1) (HD1).                                                                                                                                                                                                        |
| 1   | Q6S380           | 229                  | 4235           | 52.6                  | 4684   | 531796 | 6   | Plectin 6                                                                                                                                                                                                                                                       |
| 2   | UPI00004EC29C    | 187                  | 4256           | 36.8                  | 5890   | 629114 | 6.1 | AHNAK nucleoprotein isoform 1                                                                                                                                                                                                                                   |
| 3   | P78527           | 105                  | 1094           | 28.5                  | 4128   | 469093 | 7.1 | DNA-dependent protein kinase catalytic subunit                                                                                                                                                                                                                  |
| 3   | UPI000045790C    | 105                  | 1094           | 28.5                  | 4127   | 468980 | 7.1 | DNA-dependent protein kinase catalytic subunit (EC 2.7.11.1) (DNA-PK catalytic subunit) (DNA-PKcs) (DNPK1) (p460).                                                                                                                                              |
| 4   | Q13813           | 103                  | 712            | 47.4                  | 2472   | 284538 | 5.3 | Spectrin alpha chain, brain                                                                                                                                                                                                                                     |
| 4   | Q13813-2         | 103                  | 712            | 47.3                  | 2477   | 285093 | 5.4 | Isoform 2 of Q13813                                                                                                                                                                                                                                             |
| 4   | UPI00004577B5    | 103                  | 712            | 47.2                  | 2480   | 285480 | 5.4 | Spectrin alpha chain, brain (Spectrin, non-erythroid alpha chain) (Alpha-II spectrin) (Fodrin alpha chain).                                                                                                                                                     |
| 4   | UPI0000D61917    | 103                  | 712            | 47.1                  | 2485   | 286012 | 5.4 | Spectrin alpha chain, brain (Spectrin, non-erythroid alpha chain) (Alpha-II spectrin) (Fodrin alpha chain).                                                                                                                                                     |
| 5   | P35579           | 102                  | 1675           | 54.1                  | 1960   | 226530 | 5.6 | Myosin-9                                                                                                                                                                                                                                                        |
| 6   | Q14204           | 97                   | 574            | 24.2                  | 4646   | 532412 | 6.4 | Dynein heavy chain, cytosolic                                                                                                                                                                                                                                   |
| 6   | UPI000021D4C1    | 97                   | 574            | 24.2                  | 4647   | 532371 | 6.4 | Dynein heavy chain, cytosolic (DYHC) (Cytoplasmic dynein heavy chain 1) (DHC1) (Dynein heavy chain 1, cytoplasmic 1).                                                                                                                                           |
| 7   | UPI0000D61DF7    | 94                   | 1337           | 47.3                  | 2639   | 280044 | 6   | Filamin-A (Alpha-filamin) (Filamin-1) (Endothelial actin-binding protein) (Actin-binding protein 280) (ABP-280) (Nonmuscle filamin).                                                                                                                            |
| 7   | Q5HY53           | 94                   | 1337           | 47.3                  | 2639   | 280016 | 6   | Filamin A, alpha                                                                                                                                                                                                                                                |
| 7   | P21333           | 94                   | 1337           | 47.1                  | 2647   | 280737 | 6.1 | Filamin-A                                                                                                                                                                                                                                                       |
| 7   | UPI00004578B4    | 94                   | 1337           | 47.1                  | 2647   | 280765 | 6   | Filamin-A (Alpha-filamin) (Filamin-1) (Endothelial actin-binding protein) (Actin-binding protein 280) (ABP-280) (Nonmuscle filamin).                                                                                                                            |
| 8   | Q53R99           | 88                   | 692            | 46.8                  | 2314   | 268714 | 5.6 | Hypothetical protein SPTBN1                                                                                                                                                                                                                                     |
| 8   | Q1082            | 88                   | 692            | 45.9                  | 2364   | 274608 | 5.6 | Spectrin beta chain, brain 1                                                                                                                                                                                                                                    |
| 8   | Q59ER3           | 88                   | 692            | 45.6                  | 2377   | 276168 | 5.5 | Spectrin, beta, non-erythrocytic 1 isoform 1 variant                                                                                                                                                                                                            |
| 9   | Q9Y490           | 83                   | 747            | 45.9                  | 2541   | 269765 | 6.1 | Talin-1                                                                                                                                                                                                                                                         |
| 9   | UPI0000167B7F    | 83                   | 747            | 45.9                  | 2541   | 269665 | 6   | talin 1                                                                                                                                                                                                                                                         |
| 10  | Q00610-2         | 73                   | 891            | 53.9                  | 1639   | 187889 | 5.7 | Isoform 2 of Q00610                                                                                                                                                                                                                                             |
| 10  | Q00610           | 73                   | 891            | 52.7                  | 1675   | 191613 | 5.7 | Clathrin heavy chain 1                                                                                                                                                                                                                                          |
| 11  | Q5SYZ6           | 72                   | 1573           | 51.7                  | 1621   | 177438 | 4.4 | Nestin                                                                                                                                                                                                                                                          |
| 12  | Q9NZM1-6         | 70                   | 435            | 40.9                  | 2048   | 233474 | 6.2 | Isoform 6 of Q9NZM1                                                                                                                                                                                                                                             |
| 12  | Q9NZM1           | 70                   | 435            | 40.6                  | 2061   | 234706 | 6.2 | Myoferlin                                                                                                                                                                                                                                                       |
| 13  | UPI0000457129    | 64                   | 439            | 32.2                  | 2578   | 275692 | 5.8 | Filamin-B (FLN-B) (Beta-filamin) (Actin-binding-like protein) (Thyroid autoantigen) (Truncated actin-binding protein) (Truncated ABP) (ABP- 280 homolog) (ABP-278) (Filamin 3) (Filamin homolog 1) (Fh1).                                                       |
| 13  | O75369-2         | 64                   | 439            | 32.2                  | 2578   | 275697 | 5.8 | Isoform 2 of O75369                                                                                                                                                                                                                                             |
| 13  | Q60FE7           | 64                   | 439            | 32                    | 2591   | 276936 | 5.7 | Filamin B                                                                                                                                                                                                                                                       |
| 13  | O75369           | 64                   | 439            | 31.9                  | 2602   | 278193 | 5.7 | Filamin-B                                                                                                                                                                                                                                                       |
| 13  | UPI0000457128    | 64                   | 439            | 31.9                  | 2602   | 278188 | 5.7 | Filamin-B (FLN-B) (Beta-filamin) (Actin-binding-like protein) (Thyroid autoantigen) (Truncated actin-binding protein) (Truncated ABP) (ABP- 280 homolog) (ABP-278) (Filamin 3) (Filamin homolog 1) (Fh1).                                                       |
| 13  | UPI00001AEC01    | 64                   | 439            | 31.9                  | 2602   | 278162 | 5.7 | filamin B, beta (actin binding protein 278)                                                                                                                                                                                                                     |
| 14  | Q4LE68           | 58                   | 311            | 45.5                  | 1791   | 192381 | 4.4 | AKAP12 variant protein                                                                                                                                                                                                                                          |
| 15  | O43707           | 57                   | 994            | 70.1                  | 911    | 104854 | 5.4 | Alpha-actinin-4                                                                                                                                                                                                                                                 |
| 16  | P35580           | 56                   | 316            | 42.2                  | 1976   | 228937 | 5.5 | Myosin-10                                                                                                                                                                                                                                                       |
| 16  | Q149N4           | 56                   | 316            | 42.2                  | 1976   | 228981 | 5.5 | Myosin, heavy chain 10, non-muscle                                                                                                                                                                                                                              |
| 16  | Q149N3           | 56                   | 316            | 42.2                  | 1976   | 228997 | 5.5 | Myosin, heavy chain 10, non-muscle                                                                                                                                                                                                                              |
| 16  | P35580-3         | 56                   | 316            | 41.7                  | 1997   | 231307 | 5.5 | Isoform 3 of P35580                                                                                                                                                                                                                                             |
| 17  | P46940           | 56                   | 355            | 41.5                  | 1657   | 189251 | 6.5 | Ras GTPase-activating-like protein IQGAP1                                                                                                                                                                                                                       |
| 18  | Q6ZUD8           | 53                   | 244            | 45.4                  | 1394   | 157961 | 6.1 | CDNA FLJ43793 fis, clone TESTI4000014, highly similar to 130 kDa leucine-rich protein                                                                                                                                                                           |
| 19  | Q4LE83           | 50                   | 334            | 26.3                  | 2548   | 277368 | 6.6 | FASN variant protein                                                                                                                                                                                                                                            |
| 19  | UPI0000D623B2    | 50                   | 334            | 26.3                  | 2548   | 277428 | 6.6 | Fatty acid synthase (EC 2.3.1.85) [Includes: [Acyl-carrier-protein] S- acetyltransferase (EC 2.3.1.38); [Acyl-carrier-protein] S- malonyltransferase (EC 2.3.1.39); 3-oxoacyl-[acyl-carrier-protein] synthase (EC 2.3.1.41); 3-oxoacyl-[acyl-carrier-protein] r |
| 20  | P46821           | 49                   | 222            | 27.6                  | 2468   | 270618 | 4.8 | Microtubule-associated protein 1B (MAP 1B) [Contains: MAP1 light chain LC1]                                                                                                                                                                                     |
| 20  | UPI000013E382    | 49                   | 222            | 27.6                  | 2468   | 270632 | 4.8 | Microtubule-associated protein 1B (MAP 1B) [Contains: MAP1 light chain LC1].                                                                                                                                                                                    |
| 21  | Q5CAQ5           | 47                   | 664            | 58                    | 802    | 92340  | 4.9 | Tumor rejection antigen (Gp96) 1                                                                                                                                                                                                                                |
| 21  | P14625           | 47                   | 664            | 57.9                  | 803    | 92469  | 4.8 | Endoplasmic precursor                                                                                                                                                                                                                                           |

| No. | Accession Number | Unique Peptide Count | Spectrum Count | Sequence Coverage (%) | Length | MolWt  | pI  | Descriptive Name                                                                                                                                                                                                                                                |
|-----|------------------|----------------------|----------------|-----------------------|--------|--------|-----|-----------------------------------------------------------------------------------------------------------------------------------------------------------------------------------------------------------------------------------------------------------------|
| 22  | O75643           | 46                   | 196            | 24                    | 2136   | 244505 | 6.1 | U5 small nuclear ribonucleoprotein 200 kDa helicase                                                                                                                                                                                                             |
| 23  | Q9P2E9           | 45                   | 623            | 38.4                  | 1410   | 152472 | 8.6 | Ribosome-binding protein 1                                                                                                                                                                                                                                      |
| 24  | Q5T201           | 44                   | 178            | 45                    | 1224   | 138345 | 7.7 | Coatomer protein complex, subunit alpha                                                                                                                                                                                                                         |
| 25  | P11216           | 43                   | 457            | 58.8                  | 843    | 96696  | 6.9 | Glycogen phosphorylase, brain form                                                                                                                                                                                                                              |
| 26  | P18206-2         | 43                   | 175            | 48.5                  | 1066   | 116722 | 6.1 | Isoform 1 of P18206                                                                                                                                                                                                                                             |
| 26  | P18206           | 43                   | 175            | 45.6                  | 1134   | 123799 | 5.7 | Vinculin                                                                                                                                                                                                                                                        |
| 27  | Q9NYU2           | 43                   | 195            | 34.2                  | 1531   | 174976 | 5.6 | UDP-glucose:glycoprotein glucosyltransferase 1 precursor                                                                                                                                                                                                        |
| 27  | UPI0000D61230    | 43                   | 195            | 33.7                  | 1557   | 177373 | 5.6 | UDP-glucose:glycoprotein glucosyltransferase 1 precursor (EC 2.4.1.-) (UDP-glucose ceramide glucosyltransferase-like 1) (UDP-- Glc:glycoprotein glucosyltransferase) (HUGT1).                                                                                   |
| 27  | UPI00000707D8    | 43                   | 195            | 33.7                  | 1555   | 177189 | 5.6 | UDP-glucose ceramide glucosyltransferase-like 1 isoform 1                                                                                                                                                                                                       |
| 28  | Q00341           | 42                   | 211            | 40.5                  | 1268   | 141439 | 6.9 | Vigilin                                                                                                                                                                                                                                                         |
| 29  | Q08211           | 42                   | 388            | 39.1                  | 1270   | 140958 | 6.8 | ATP-dependent RNA helicase A                                                                                                                                                                                                                                    |
| 29  | UPI0000D62059    | 42                   | 388            | 37.7                  | 1315   | 146474 | 6.9 | ATP-dependent RNA helicase A (EC 3.6.1.-) (Nuclear DNA helicase II) (NDH II) (DEAH box protein 9).                                                                                                                                                              |
| 30  | P08670           | 41                   | 2866           | 78.8                  | 466    | 53652  | 5.1 | Vimentin                                                                                                                                                                                                                                                        |
| 31  | P02545           | 41                   | 712            | 60.2                  | 664    | 74140  | 7   | Lamin A/C                                                                                                                                                                                                                                                       |
| 31  | Q5I6Y6           | 41                   | 712            | 60.2                  | 664    | 74082  | 7.2 | Lamin A/C transcript variant 1                                                                                                                                                                                                                                  |
| 32  | UPI000004D059    | 41                   | 170            | 47.4                  | 1048   | 116052 | 5.7 | integrin alpha-V precursor                                                                                                                                                                                                                                      |
| 33  | P13639           | 39                   | 551            | 50.7                  | 858    | 95338  | 6.8 | Elongation factor 2                                                                                                                                                                                                                                             |
| 34  | Q14152           | 39                   | 212            | 29.5                  | 1382   | 166569 | 6.8 | Eukaryotic translation initiation factor 3 subunit 10                                                                                                                                                                                                           |
| 34  | Q24JU4           | 39                   | 212            | 29.5                  | 1382   | 166470 | 6.7 | Eukaryotic translation initiation factor 3, subunit 10 theta, 150/170kDa                                                                                                                                                                                        |
| 35  | P55072           | 38                   | 349            | 59.4                  | 806    | 89322  | 5.3 | Transitional endoplasmic reticulum ATPase (TER ATPase) (15S Mg(2+)- ATPase p97 subunit)                                                                                                                                                                         |
| 35  | Q0V924           | 38                   | 349            | 59.4                  | 806    | 89344  | 5.3 | Valosin-containing protein                                                                                                                                                                                                                                      |
| 36  | Q9Y4L1           | 37                   | 257            | 46.1                  | 999    | 111335 | 5.2 | 150 kDa oxygen-regulated protein precursor                                                                                                                                                                                                                      |
| 37  | UPI000014054E    | 37                   | 214            | 25.8                  | 1600   | 175618 | 5.3 | Eukaryotic translation initiation factor 4 gamma 1 (eIF-4-gamma 1) (eIF-4G1) (eIF-4G 1) (p220).                                                                                                                                                                 |
| 38  | P10809           | 35                   | 856            | 71.4                  | 573    | 61055  | 5.9 | 60 kDa heat shock protein, mitochondrial precursor                                                                                                                                                                                                              |
| 38  | UPI000013D97A    | 35                   | 856            | 71.1                  | 575    | 61213  | 5.9 | 60 kDa heat shock protein, mitochondrial precursor (Hsp60) (60 kDa chaperonin) (CPN60) (Heat shock protein 60) (HSP-60) (Mitochondrial matrix protein P1) (P60 lymphocyte protein) (HuCHA60).                                                                   |
| 39  | P14618           | 35                   | 817            | 66.9                  | 531    | 57937  | 7.8 | Pyruvate kinase isozymes M1/M2                                                                                                                                                                                                                                  |
| 39  | Q53GK4           | 35                   | 817            | 66.9                  | 531    | 57984  | 8.1 | Pyruvate kinase 3 isoform 1 variant                                                                                                                                                                                                                             |
| 40  | P13667           | 35                   | 328            | 56.7                  | 645    | 72933  | 5.1 | Protein disulfide-isomerase A4 precursor                                                                                                                                                                                                                        |
| 41  | P08238           | 35                   | 704            | 51.5                  | 724    | 83264  | 5   | Heat shock protein HSP 90-beta                                                                                                                                                                                                                                  |
| 41  | UPI00001AE8D8    | 35                   | 704            | 50.7                  | 736    | 84758  | 5.4 | Heat shock protein HSP 90-beta (HSP 84) (HSP 90).                                                                                                                                                                                                               |
| 42  | UPI0000225CC0    | 35                   | 144            | 38.7                  | 1091   | 119772 | 7.3 | ATP citrate lyase isoform 2                                                                                                                                                                                                                                     |
| 42  | P53396           | 35                   | 144            | 38.3                  | 1101   | 120839 | 7.3 | ATP-citrate synthase (EC 2.3.3.8) (ATP-citrate (pro-S)-lyase)                                                                                                                                                                                                   |
| 43  | P05023           | 35                   | 467            | 37.1                  | 1023   | 112896 | 5.5 | Sodium/potassium-transporting ATPase alpha-1 chain precursor (EC 3.6.3.9) (Sodium pump 1) (Na(+)/K(+) ATPase 1)                                                                                                                                                 |
| 44  | P12814           | 34                   | 303            | 66.3                  | 892    | 103058 | 5.4 | Alpha-actinin-1                                                                                                                                                                                                                                                 |
| 45  | Q92598           | 34                   | 149            | 49.2                  | 858    | 96865  | 5.4 | Heat-shock protein 105 kDa                                                                                                                                                                                                                                      |
| 46  | P33176           | 34                   | 124            | 43.7                  | 963    | 109685 | 6.5 | Kinesin heavy chain                                                                                                                                                                                                                                             |
| 47  | Q7KZF4           | 34                   | 279            | 45.4                  | 910    | 101997 | 7.2 | Staphylococcal nuclease domain-containing protein 1                                                                                                                                                                                                             |
| 47  | Q59FF0           | 34                   | 279            | 42.8                  | 964    | 107433 | 7.5 | EBNA-2 co-activator variant                                                                                                                                                                                                                                     |
| 48  | P27816           | 34                   | 178            | 38.2                  | 1152   | 121019 | 5.4 | Microtubule-associated protein 4                                                                                                                                                                                                                                |
| 48  | UPI000020A6A4    | 34                   | 178            | 38.2                  | 1152   | 121005 | 5.4 | microtubule-associated protein 4 isoform 1                                                                                                                                                                                                                      |
| 48  | Q59FT2           | 34                   | 178            | 37.8                  | 1163   | 122941 | 6.7 | Microtubule-associated protein 4 isoform 1 variant                                                                                                                                                                                                              |
| 49  | A0AVA9           | 34                   | 160            | 27.8                  | 1512   | 170590 | 7.3 | EPRS protein                                                                                                                                                                                                                                                    |
| 50  | Q6UVK1           | 34                   | 219            | 20                    | 2322   | 250494 | 5.5 | Chondroitin sulfate proteoglycan 4 precursor                                                                                                                                                                                                                    |
| 50  | UPI00001AEEB6    | 34                   | 219            | 20                    | 2322   | 250534 | 5.5 | chondroitin sulfate proteoglycan 4                                                                                                                                                                                                                              |
| 51  | UPI00003677FD    | 34                   | 130            | 19.5                  | 2330   | 256509 | 5.8 | fibronectin 1 isoform 4 preproprotein                                                                                                                                                                                                                           |
| 51  | UPI0000167B25    | 34                   | 130            | 19.3                  | 2355   | 259223 | 5.7 | fibronectin 1 isoform 3 preproprotein                                                                                                                                                                                                                           |
| 51  | P02751-3         | 34                   | 130            | 19.3                  | 2355   | 259195 | 5.7 | Isoform 3 of P02751                                                                                                                                                                                                                                             |
| 51  | P02751           | 34                   | 130            | 19.1                  | 2386   | 262604 | 5.7 | Fibronectin precursor                                                                                                                                                                                                                                           |
| 52  | Q4LE33           | 34                   | 178            | 18.5                  | 2233   | 244402 | 4.9 | TNC variant protein                                                                                                                                                                                                                                             |
| 53  | P11717           | 33                   | 126            | 13.6                  | 2491   | 274274 | 5.9 | Cation-independent mannose-6-phosphate receptor precursor                                                                                                                                                                                                       |
| 53  | UPI0000072478    | 33                   | 126            | 13.6                  | 2491   | 274373 | 5.9 | Cation-independent mannose-6-phosphate receptor precursor (Cl Man-6-P receptor) (Cl-MPR) (M6PR) (Insulin-like growth factor 2 receptor) (Insulin-like growth factor II receptor) (IGF-II receptor) (M6P/IGF2 receptor) (M6P/IGF2R) (300 kDa mannose 6-phosphate |
| 54  | P11142           | 32                   | 585            | 55                    | 646    | 70898  | 5.5 | Heat shock cognate 71 kDa protein                                                                                                                                                                                                                               |
| 55  | P31948           | 32                   | 79             | 52.1                  | 543    | 62639  | 6.8 | Stress-induced-phosphoprotein 1                                                                                                                                                                                                                                 |
| 56  | Q9Y678           | 32                   | 187            | 52.1                  | 874    | 97718  | 5.5 | Coatomer subunit gamma                                                                                                                                                                                                                                          |

| No. | Accession Number | Unique Peptide Count | Spectrum Count | Sequence Coverage (%) | Length | MolWt  | pI  | Descriptive Name                                                                                                                                                                                                                                               |
|-----|------------------|----------------------|----------------|-----------------------|--------|--------|-----|----------------------------------------------------------------------------------------------------------------------------------------------------------------------------------------------------------------------------------------------------------------|
| 57  | Q2TAL4           | 32                   | 144            | 50.7                  | 840    | 94331  | 5.2 | Heat shock 70kDa protein 4                                                                                                                                                                                                                                     |
| 58  | Q86UP2-2         | 32                   | 117            | 25.8                  | 1300   | 149610 | 5.7 | Isoform 2 of Q86UP2                                                                                                                                                                                                                                            |
| 58  | Q86UP2           | 32                   | 117            | 24.7                  | 1357   | 156275 | 5.6 | Kinectin                                                                                                                                                                                                                                                       |
| 59  | P09874           | 31                   | 96             | 36.1                  | 1014   | 113084 | 8.9 | Poly [ADP-ribose] polymerase 1 (EC 2.4.2.30) (PARP-1) (ADPRT) (NAD(+) ADP-ribosyltransferase 1)                                                                                                                                                                |
| 60  | Q14683           | 31                   | 84             | 23.9                  | 1233   | 143233 | 7.6 | Structural maintenance of chromosomes protein 1A                                                                                                                                                                                                               |
| 61  | P50395           | 30                   | 154            | 76.9                  | 445    | 50663  | 6.5 | Rab GDP dissociation inhibitor beta                                                                                                                                                                                                                            |
| 62  | P50990           | 30                   | 154            | 64.8                  | 548    | 59621  | 5.6 | T-complex protein 1 subunit theta                                                                                                                                                                                                                              |
| 63  | P27824           | 30                   | 576            | 48.8                  | 592    | 67568  | 4.6 | Calnexin precursor                                                                                                                                                                                                                                             |
| 64  | Q15075           | 30                   | 38             | 25.9                  | 1411   | 162465 | 5.7 | Early endosome antigen 1                                                                                                                                                                                                                                       |
| 64  | UPI000013C754    | 30                   | 38             | 25.9                  | 1411   | 162465 | 5.7 | Early endosome antigen 1 (Endosome-associated protein p162) (Zinc finger FYVE domain-containing protein 2).                                                                                                                                                    |
| 65  | Q14697           | 29                   | 136            | 35.1                  | 944    | 106874 | 6.1 | Neutral alpha-glucosidase AB precursor                                                                                                                                                                                                                         |
| 65  | UPI00003667D2    | 29                   | 136            | 35.1                  | 944    | 106847 | 6.2 | Neutral alpha-glucosidase AB precursor (EC 3.2.1.84) (Glucosidase II subunit alpha).                                                                                                                                                                           |
| 66  | UPI00001B03B3    | 29                   | 72             | 23.5                  | 1564   | 172738 | 5.2 | Desmuslin.                                                                                                                                                                                                                                                     |
| 66  | UPI0000DC3AA9    | 29                   | 72             | 23.5                  | 1565   | 172867 | 5.2 | desmuslin isoform A                                                                                                                                                                                                                                            |
| 67  | P07237           | 28                   | 371            | 61.8                  | 508    | 57116  | 4.9 | Protein disulfide-isomerase precursor                                                                                                                                                                                                                          |
| 68  | Q16658           | 28                   | 256            | 59.8                  | 493    | 54530  | 7.2 | Fascin                                                                                                                                                                                                                                                         |
| 68  | UPI0000D61BF6    | 28                   | 256            | 59.8                  | 493    | 54640  | 7.8 | Fascin (Singed-like protein) (55 kDa actin-bundling protein) (p55).                                                                                                                                                                                            |
| 68  | Q96IH1           | 28                   | 256            | 59                    | 500    | 55136  | 7.2 | FSCN1 protein                                                                                                                                                                                                                                                  |
| 69  | P40939           | 28                   | 106            | 52.6                  | 763    | 83000  | 9   | Trifunctional enzyme subunit alpha, mitochondrial precursor (TP-alpha) (78 kDa gastrin-binding protein) [Includes: Long-chain enoyl-CoA hydratase (EC 4.2.1.17); Long chain 3-hydroxyacyl-CoA dehydrogenase (EC 1.1.1.211)]                                    |
| 70  | O00571           | 28                   | 127            | 50.5                  | 662    | 73244  | 7.2 | ATP-dependent RNA helicase DDX3X                                                                                                                                                                                                                               |
| 71  | P11021           | 28                   | 377            | 48.9                  | 654    | 72333  | 5.2 | 78 kDa glucose-regulated protein precursor (GRP78) (Heat shock 70 kDa protein 5) (Immunoglobulin heavy chain-binding protein) (BiP) (Endoplasmic reticulum luminal Ca(2+)-binding protein grp78)                                                               |
| 72  | P26038           | 28                   | 242            | 48.2                  | 577    | 67820  | 6.4 | Moesin                                                                                                                                                                                                                                                         |
| 73  | Q05682-5         | 28                   | 203            | 47.7                  | 532    | 61213  | 6.7 | Isoform 5 of Q05682                                                                                                                                                                                                                                            |
| 73  | Q05682-4         | 28                   | 203            | 47.2                  | 538    | 62663  | 6.4 | Isoform 4 of Q05682                                                                                                                                                                                                                                            |
| 74  | P38646           | 28                   | 147            | 47                    | 679    | 73681  | 6.2 | Stress-70 protein, mitochondrial precursor                                                                                                                                                                                                                     |
| 75  | Q9NR30           | 28                   | 85             | 42.7                  | 783    | 87344  | 9.3 | Nucleolar RNA helicase 2                                                                                                                                                                                                                                       |
| 76  | P53618           | 28                   | 136            | 39                    | 953    | 107142 | 6   | Coatomeer subunit beta                                                                                                                                                                                                                                         |
| 77  | Q14764           | 28                   | 94             | 39                    | 893    | 99327  | 5.5 | Major vault protein                                                                                                                                                                                                                                            |
| 78  | Q16531           | 28                   | 40             | 26.8                  | 1140   | 126968 | 5.3 | DNA damage-binding protein 1                                                                                                                                                                                                                                   |
| 78  | UPI0000D62613    | 28                   | 40             | 26.8                  | 1140   | 126966 | 5.3 | DNA damage-binding protein 1 (Damage-specific DNA-binding protein 1) (UV-damaged DNA-binding factor) (DDB p127 subunit) (DDBa) (UV-damaged DNA-binding protein 1) (UV-DDB 1) (Xeroderma pigmentosum group E- complementing protein) (XPc) (XPE-binding factor) |
| 79  | P26640           | 28                   | 82             | 24.8                  | 1264   | 140476 | 7.6 | Valyl-tRNA synthetase                                                                                                                                                                                                                                          |
| 79  | UPI0000457409    | 28                   | 82             | 24.8                  | 1264   | 140376 | 7.8 | Valyl-tRNA synthetase (EC 6.1.1.9) (Valine--tRNA ligase) (ValRS) (Protein G7a).                                                                                                                                                                                |
| 80  | Q6P2Q9           | 28                   | 106            | 13.3                  | 2335   | 273599 | 8.8 | Pre-mRNA-processing-splicing factor 8                                                                                                                                                                                                                          |
| 81  | Q07065           | 27                   | 348            | 51.7                  | 602    | 66023  | 5.9 | Cytoskeleton-associated protein 4                                                                                                                                                                                                                              |
| 82  | P26639           | 27                   | 108            | 48.7                  | 723    | 83435  | 6.7 | Threonyl-tRNA synthetase, cytoplasmic                                                                                                                                                                                                                          |
| 82  | Q53GX7           | 27                   | 108            | 48.7                  | 723    | 83445  | 6.7 | Threonyl-tRNA synthetase variant                                                                                                                                                                                                                               |
| 83  | P52272-2         | 27                   | 206            | 45.6                  | 691    | 73621  | 8.8 | Isoform 2 of P52272                                                                                                                                                                                                                                            |
| 83  | P52272           | 27                   | 206            | 43.2                  | 730    | 77516  | 8.7 | Heterogeneous nuclear ribonucleoprotein M                                                                                                                                                                                                                      |
| 84  | Q16891-2         | 27                   | 72             | 42.8                  | 747    | 82625  | 6.6 | Isoform 2 of Q16891                                                                                                                                                                                                                                            |
| 85  | P22314           | 27                   | 139            | 39.1                  | 1058   | 117849 | 5.8 | Ubiquitin-activating enzyme E1                                                                                                                                                                                                                                 |
| 86  | Q86VX4           | 27                   | 60             | 26                    | 1217   | 141507 | 7.2 | Structural maintenance of chromosomes 3                                                                                                                                                                                                                        |
| 86  | UPI0000D60FCC    | 27                   | 60             | 26                    | 1217   | 141557 | 7.4 | Structural maintenance of chromosomes protein 3 (Chondroitin sulfate proteoglycan 6) (Chromosome-associated polypeptide) (hCAP) (Bamacan) (Basement membrane-associated chondroitin proteoglycan).                                                             |
| 86  | Q9UQE7           | 27                   | 60             | 26                    | 1217   | 141541 | 7.2 | Structural maintenance of chromosomes protein 3                                                                                                                                                                                                                |
| 87  | Q6YHK3           | 27                   | 129            | 23.5                  | 1445   | 161688 | 5.8 | CD109 antigen precursor                                                                                                                                                                                                                                        |
| 88  | Q9NTJ3           | 27                   | 73             | 21.8                  | 1288   | 147182 | 6.8 | Structural maintenance of chromosomes protein 4                                                                                                                                                                                                                |
| 89  | P07355           | 26                   | 647            | 73.5                  | 339    | 38604  | 7.8 | Annexin A2                                                                                                                                                                                                                                                     |
| 89  | Q8TBV2           | 26                   | 647            | 73.5                  | 339    | 38576  | 7.8 | Annexin A2                                                                                                                                                                                                                                                     |
| 89  | UPI0000366A50    | 26                   | 647            | 69.7                  | 357    | 40411  | 8.4 | annexin A2 isoform 1                                                                                                                                                                                                                                           |
| 90  | Q2Q9H2           | 26                   | 81             | 66.5                  | 475    | 54825  | 7.1 | Glucose-6-phosphate 1-dehydrogenase                                                                                                                                                                                                                            |
| 91  | UPI0000D61699    | 26                   | 85             | 48.5                  | 670    | 75529  | 5.6 | Annexin A6 (Annexin VI) (Lipocortin VI) (P68) (P70) (Protein III) (Chromobindin-20) (67 kDa calelectrin) (Calphobindin-II) (CPB-II).                                                                                                                           |
| 91  | P08133           | 26                   | 85             | 48.3                  | 673    | 75873  | 5.6 | Annexin A6                                                                                                                                                                                                                                                     |
| 92  | A4D210           | 26                   | 101            | 39.2                  | 775    | 88681  | 5.1 | Eukaryotic translation initiation factor 3, subunit 9 eta, 116kDa                                                                                                                                                                                              |



| No. | Accession Number | Unique Peptide Count | Spectrum Count | Sequence Coverage (%) | Length | MolWt  | pI  | Descriptive Name                                                                                                                                                                                                                                                  |
|-----|------------------|----------------------|----------------|-----------------------|--------|--------|-----|-------------------------------------------------------------------------------------------------------------------------------------------------------------------------------------------------------------------------------------------------------------------|
| 92  | A4D208           | 26                   | 101            | 37.3                  | 814    | 92482  | 5   | Eukaryotic translation initiation factor 3, subunit 9 eta, 116kDa                                                                                                                                                                                                 |
| 92  | P55884           | 26                   | 101            | 37.3                  | 814    | 92492  | 5   | Eukaryotic translation initiation factor 3 subunit 9                                                                                                                                                                                                              |
| 92  | P55884-2         | 26                   | 101            | 34.8                  | 873    | 99039  | 5.1 | Isoform 2 of P55884                                                                                                                                                                                                                                               |
| 93  | O43143           | 26                   | 96             | 37                    | 795    | 90933  | 7.5 | Putative pre-mRNA-splicing factor ATP-dependent RNA helicase DHX15                                                                                                                                                                                                |
| 94  | P16615-2         | 26                   | 404            | 34.1                  | 997    | 109691 | 5.4 | Isoform SERCA2A of P16615                                                                                                                                                                                                                                         |
| 94  | P16615           | 26                   | 404            | 32.6                  | 1042   | 114757 | 5.3 | Sarcoplasmic/endoplasmic reticulum calcium ATPase 2 (EC 3.6.3.8) (Calcium pump 2) (SERCA2) (SR Ca(2+)-ATPase 2) (Calcium-transporting ATPase sarcoplasmic reticulum type, slow twitch skeletal muscle isoform) (Endoplasmic reticulum class 1/2 Ca(2+) ATPase)    |
| 95  | P55060-3         | 26                   | 127            | 31.6                  | 945    | 107777 | 5.8 | Isoform 3 of P55060                                                                                                                                                                                                                                               |
| 95  | P55060           | 26                   | 127            | 30.8                  | 971    | 110417 | 5.8 | Exportin-2                                                                                                                                                                                                                                                        |
| 96  | Q86VP6           | 26                   | 125            | 25.7                  | 1230   | 136375 | 5.8 | Cullin-associated NEDD8-dissociated protein 1                                                                                                                                                                                                                     |
| 97  | Q14839           | 26                   | 68             | 15.4                  | 1912   | 217989 | 5.9 | Chromodomain helicase-DNA-binding protein 4                                                                                                                                                                                                                       |
| 97  | UPI000013C8EF    | 26                   | 68             | 15.4                  | 1912   | 218003 | 5.9 | chromodomain helicase DNA binding protein 4                                                                                                                                                                                                                       |
| 97  | UPI00001AE66A    | 26                   | 68             | 15.2                  | 1940   | 220846 | 6   | Chromodomain helicase-DNA-binding protein 4 (EC 3.6.1.-) (ATP- dependent helicase CHD4) (CHD-4) (Mi-2 autoantigen 218 kDa protein) (Mi2-beta).                                                                                                                    |
| 97  | Q14839-2         | 26                   | 68             | 15.2                  | 1940   | 220832 | 6   | Isoform 2 of Q14839                                                                                                                                                                                                                                               |
| 98  | P12270           | 26                   | 74             | 13.1                  | 2349   | 265598 | 5.1 | Nucleoprotein TPR                                                                                                                                                                                                                                                 |
| 98  | Q5SWY0           | 26                   | 74             | 13                    | 2363   | 267290 | 5   | Translocated promoter region                                                                                                                                                                                                                                      |
| 99  | P00558           | 25                   | 133            | 68.1                  | 417    | 44615  | 8.1 | Phosphoglycerate kinase 1                                                                                                                                                                                                                                         |
| 100 | P30101           | 25                   | 249            | 56.8                  | 505    | 56782  | 6.4 | Protein disulfide-isomerase A3 precursor                                                                                                                                                                                                                          |
| 101 | Q5SZY0           | 25                   | 118            | 53.6                  | 522    | 57972  | 6.9 | Chaperonin containing TCP1, subunit 3                                                                                                                                                                                                                             |
| 101 | UPI00004CA9C4    | 25                   | 118            | 51.5                  | 544    | 60463  | 6.5 | chaperonin containing TCP1, subunit 3 isoform b                                                                                                                                                                                                                   |
| 101 | P49368           | 25                   | 118            | 51.4                  | 545    | 60534  | 6.5 | T-complex protein 1 subunit gamma                                                                                                                                                                                                                                 |
| 102 | P29401           | 25                   | 160            | 48.2                  | 623    | 67878  | 7.7 | Transketolase                                                                                                                                                                                                                                                     |
| 102 | Q53EM5           | 25                   | 160            | 48.2                  | 623    | 67906  | 7.8 | Transketolase variant                                                                                                                                                                                                                                             |
| 103 | Q53T76           | 25                   | 80             | 46.3                  | 693    | 77252  | 6.9 | Hypothetical protein GPD2                                                                                                                                                                                                                                         |
| 103 | P43304           | 25                   | 80             | 44.2                  | 727    | 80834  | 7.5 | Glycerol-3-phosphate dehydrogenase, mitochondrial precursor                                                                                                                                                                                                       |
| 104 | Q00839-2         | 25                   | 230            | 32.1                  | 806    | 88980  | 5.8 | Isoform Short of Q00839                                                                                                                                                                                                                                           |
| 104 | Q00839           | 25                   | 230            | 31.4                  | 824    | 90514  | 6   | Heterogeneous nuclear ribonucleoprotein U                                                                                                                                                                                                                         |
| 105 | UPI0000F0A52B    | 25                   | 90             | 27.2                  | 1044   | 119628 | 9.5 | myosin IC isoform b                                                                                                                                                                                                                                               |
| 106 | P11388           | 25                   | 85             | 18.8                  | 1531   | 174384 | 8.7 | DNA topoisomerase 2-alpha                                                                                                                                                                                                                                         |
| 106 | P11388-2         | 25                   | 85             | 18.5                  | 1557   | 177500 | 8.8 | Isoform 2 of P11388                                                                                                                                                                                                                                               |
| 106 | UPI0000D6231D    | 25                   | 85             | 18.4                  | 1568   | 178882 | 8.7 | TOP2A_HUMAN Isoform 2 of P11388 - Homo sapiens (Human)                                                                                                                                                                                                            |
| 106 | P11388-3         | 25                   | 85             | 18.4                  | 1567   | 178711 | 8.8 | Isoform 3 of P11388                                                                                                                                                                                                                                               |
| 106 | P11388-4         | 25                   | 85             | 17.9                  | 1612   | 182680 | 8.6 | Isoform 4 of P11388                                                                                                                                                                                                                                               |
| 107 | P07437           | 24                   | 612            | 72.5                  | 444    | 49671  | 4.9 | Tubulin beta chain                                                                                                                                                                                                                                                |
| 108 | P35998           | 24                   | 68             | 62.6                  | 433    | 48634  | 5.9 | 26S protease regulatory subunit 7                                                                                                                                                                                                                                 |
| 108 | Q3LIA5           | 24                   | 68             | 62.6                  | 433    | 48618  | 6.1 | Hypothetical protein Nbla10058                                                                                                                                                                                                                                    |
| 109 | P09493-3         | 24                   | 194            | 55.6                  | 284    | 32876  | 4.8 | Isoform 3 of P09493                                                                                                                                                                                                                                               |
| 110 | P25705           | 24                   | 148            | 52.4                  | 553    | 59751  | 9.1 | ATP synthase subunit alpha, mitochondrial precursor                                                                                                                                                                                                               |
| 111 | P04843           | 24                   | 591            | 48.6                  | 607    | 68569  | 6.4 | Dolichyl-diphosphooligosaccharide--protein glycosyltransferase 67 kDa subunit precursor                                                                                                                                                                           |
| 111 | Q6IBR0           | 24                   | 591            | 48.6                  | 607    | 68607  | 6.4 | RPN1 protein                                                                                                                                                                                                                                                      |
| 111 | Q53EP4           | 24                   | 591            | 48.6                  | 607    | 68580  | 6.4 | Ribophorin I variant                                                                                                                                                                                                                                              |
| 112 | P49748           | 24                   | 75             | 48.4                  | 655    | 70390  | 8.8 | Very-long-chain specific acyl-CoA dehydrogenase, mitochondrial precursor                                                                                                                                                                                          |
| 113 | Q5U4P6           | 24                   | 97             | 41.7                  | 710    | 72897  | 7.9 | KHSRP protein                                                                                                                                                                                                                                                     |
| 113 | UPI0000D61707    | 24                   | 97             | 41.3                  | 717    | 73805  | 8.1 | Far upstream element-binding protein 2 (FUSE-binding protein 2) (KH type-splicing regulatory protein) (KSRP) (p75).                                                                                                                                               |
| 114 | P11940           | 24                   | 100            | 41.4                  | 636    | 70671  | 9.5 | Polyadenylate-binding protein 1 (Poly(A)-binding protein 1)                                                                                                                                                                                                       |
| 115 | Q14974           | 24                   | 183            | 37                    | 876    | 97170  | 4.8 | Importin beta-1 subunit                                                                                                                                                                                                                                           |
| 116 | Q13200           | 24                   | 84             | 34                    | 908    | 100200 | 5.2 | 26S proteasome non-ATPase regulatory subunit 2                                                                                                                                                                                                                    |
| 116 | Q53XQ4           | 24                   | 84             | 34                    | 908    | 100249 | 5.2 | Proteasome (Prosome, macropain) 26S subunit, non-ATPase, 2                                                                                                                                                                                                        |
| 116 | Q59EG8           | 24                   | 84             | 33.8                  | 913    | 100588 | 5.2 | Proteasome 26S non-ATPase subunit 2 variant                                                                                                                                                                                                                       |
| 117 | UPI0000161B5A    | 24                   | 62             | 34.3                  | 835    | 93394  | 5.1 | Ubiquitin isopeptidase T                                                                                                                                                                                                                                          |
| 117 | P45974-2         | 24                   | 62             | 34.3                  | 835    | 93308  | 5.1 | Isoform Short of P45974                                                                                                                                                                                                                                           |
| 117 | P45974           | 24                   | 62             | 33.3                  | 858    | 95786  | 5   | Ubiquitin carboxyl-terminal hydrolase 5                                                                                                                                                                                                                           |
| 118 | Q12906           | 24                   | 113            | 32.6                  | 894    | 95339  | 8.8 | Interleukin enhancer-binding factor 3                                                                                                                                                                                                                             |
| 119 | Q4W4Y1           | 24                   | 62             | 31                    | 868    | 96079  | 6.5 | Dopamine receptor interacting protein 4                                                                                                                                                                                                                           |
| 119 | Q8WUM4           | 24                   | 62             | 31                    | 868    | 96023  | 6.5 | Programmed cell death 6-interacting protein                                                                                                                                                                                                                       |
| 119 | Q6NUS1           | 24                   | 62             | 30.8                  | 873    | 96818  | 6.5 | PDCD6IP protein                                                                                                                                                                                                                                                   |
| 120 | UPI0000456CFE    | 24                   | 62             | 29                    | 955    | 105371 | 7.9 | AP-2 complex subunit alpha-1 (Adapter-related protein complex 2 alpha- 1 subunit) (Alpha-adaptin A) (Adaptor protein complex AP-2 alpha-1 subunit) (Clathrin assembly protein complex 2 alpha-A subunit chain) (100 kDa coated vesicle protein A) (Plasma membran |

| No. | Accession Number | Unique Peptide Count | Spectrum Count | Sequence Coverage (%) | Length | MolWt  | pI  | Descriptive Name                                                                                                                                                                                                                                                                                  |
|-----|------------------|----------------------|----------------|-----------------------|--------|--------|-----|---------------------------------------------------------------------------------------------------------------------------------------------------------------------------------------------------------------------------------------------------------------------------------------------------|
| 120 | UPI0000037C08    | 24                   | 62             | 29                    | 955    | 105361 | 7.7 | adaptor-related protein complex 2, alpha 1 subunit isoform 2                                                                                                                                                                                                                                      |
| 120 | O95782-2         | 24                   | 62             | 29                    | 955    | 105370 | 7.7 | Isoform B of O95782                                                                                                                                                                                                                                                                               |
| 120 | O95782           | 24                   | 62             | 28.4                  | 977    | 107555 | 7.1 | AP-2 complex subunit alpha-1                                                                                                                                                                                                                                                                      |
| 120 | UPI0000456CFD    | 24                   | 62             | 28.4                  | 977    | 107555 | 7.3 | AP-2 complex subunit alpha-1 (Adapter-related protein complex 2 alpha-1 subunit) (Alpha-adaptin A) (Adaptor protein complex AP-2 alpha-1 subunit) (Clathrin assembly protein complex 2 alpha-A large chain) (100 kDa coated vesicle protein A) (Plasma membran                                    |
| 120 | UPI0000167B50    | 24                   | 62             | 28.4                  | 977    | 107546 | 7   | adaptor-related protein complex 2, alpha 1 subunit isoform 1                                                                                                                                                                                                                                      |
| 121 | Q86W92-2         | 24                   | 57             | 28.4                  | 1005   | 113181 | 5.7 | Isoform 2 of Q86W92                                                                                                                                                                                                                                                                               |
| 122 | O75533           | 24                   | 110            | 24.2                  | 1304   | 145815 | 7   | Splicing factor 3B subunit 1                                                                                                                                                                                                                                                                      |
| 122 | UPI000013D493    | 24                   | 110            | 24.2                  | 1304   | 145830 | 7.1 | splicing factor 3b, subunit 1 isoform 1                                                                                                                                                                                                                                                           |
| 123 | P41252           | 24                   | 64             | 21.2                  | 1266   | 144958 | 6.2 | Isoleucyl-tRNA synthetase, cytoplasmic                                                                                                                                                                                                                                                            |
| 123 | Q59G75           | 24                   | 64             | 21                    | 1279   | 146344 | 6.4 | Isoleucyl-tRNA synthetase, cytoplasmic variant                                                                                                                                                                                                                                                    |
| 124 | Q53SY7           | 24                   | 71             | 14.2                  | 2151   | 235175 | 6.6 | Hypothetical protein CAD                                                                                                                                                                                                                                                                          |
| 124 | P27708           | 24                   | 71             | 13.7                  | 2225   | 242981 | 6.5 | CAD protein [Includes: Glutamine-dependent carbamoyl-phosphate synthase (EC 6.3.5.5); Aspartate carbamoyltransferase (EC 2.1.3.2); Dihydroorotase (EC 3.5.2.3)]                                                                                                                                   |
| 125 | P31939           | 23                   | 61             | 54.1                  | 592    | 64616  | 6.7 | Bifunctional purine biosynthesis protein PURH [Includes: Phosphoribosylaminoimidazolecarboxamide formyltransferase (EC 2.1.2.3) (5-aminoimidazole-4-carboxamide ribonucleotide formyltransferase) (AICAR transformylase); IMP cyclohydrolase (EC 3.5.4.10) (Inosinicase) (IMP synthetase) (ATIC)] |
| 126 | P47895           | 23                   | 87             | 53.9                  | 512    | 56109  | 7.3 | Aldehyde dehydrogenase 1A3                                                                                                                                                                                                                                                                        |
| 126 | UPI0000129264    | 23                   | 87             | 53.9                  | 512    | 56009  | 7   | aldehyde dehydrogenase 1A3                                                                                                                                                                                                                                                                        |
| 127 | Q53G71           | 23                   | 164            | 53.2                  | 406    | 46919  | 4.4 | Calreticulin variant                                                                                                                                                                                                                                                                              |
| 127 | P27797           | 23                   | 164            | 51.8                  | 417    | 48142  | 4.4 | Calreticulin precursor                                                                                                                                                                                                                                                                            |
| 128 | O60506-2         | 23                   | 130            | 48.5                  | 588    | 65682  | 8.6 | Isoform 2 of O60506                                                                                                                                                                                                                                                                               |
| 128 | O60506           | 23                   | 130            | 45.7                  | 623    | 69603  | 8.6 | Heterogeneous nuclear ribonucleoprotein Q                                                                                                                                                                                                                                                         |
| 129 | P12956           | 23                   | 145            | 43.3                  | 609    | 69843  | 6.6 | ATP-dependent DNA helicase 2 subunit 1                                                                                                                                                                                                                                                            |
| 129 | UPI000045708A    | 23                   | 145            | 43.3                  | 609    | 69870  | 6.6 | ATP-dependent DNA helicase 2 subunit 1 (ATP-dependent DNA helicase II 70 kDa subunit) (Lupus Ku autoantigen protein p70) (Ku70) (70 kDa subunit of Ku antigen) (Thyroid-lupus autoantigen) (TLAA) (CTC box- binding factor 75 kDa subunit) (CTCBF) (CTC75) (DNA                                   |
| 129 | Q6FG89           | 23                   | 145            | 43.3                  | 609    | 69873  | 6.6 | G22P1 protein                                                                                                                                                                                                                                                                                     |
| 130 | O00429-4         | 23                   | 101            | 43.3                  | 699    | 78100  | 6.8 | Isoform 4 of O00429                                                                                                                                                                                                                                                                               |
| 130 | UPI0000D621CC    | 23                   | 101            | 42.7                  | 710    | 79224  | 7.1 | Dynamin-1-like protein (EC 3.6.5.5) (Dynamin-like protein) (Dnm1p/Vps1p-like protein) (DVLP) (Dynamin family member proline-rich carboxyl-terminal domain less) (Dymple) (Dynamin-related protein 1) (Dynamin-like protein 4) (Dynamin-like protein IV) (HdynIV                                   |
| 130 | O00429-5         | 23                   | 101            | 42.7                  | 710    | 79109  | 6.9 | Isoform 5 of O00429                                                                                                                                                                                                                                                                               |
| 130 | O00429-3         | 23                   | 101            | 42.7                  | 710    | 79442  | 6.9 | Isoform 3 of O00429                                                                                                                                                                                                                                                                               |
| 130 | O00429-2         | 23                   | 101            | 41.8                  | 725    | 80536  | 6.7 | Isoform 2 of O00429                                                                                                                                                                                                                                                                               |
| 130 | O00429           | 23                   | 101            | 41.2                  | 736    | 81877  | 6.8 | Dynamin-1-like protein                                                                                                                                                                                                                                                                            |
| 130 | Q59GN9           | 23                   | 101            | 40.3                  | 751    | 83579  | 7.7 | Dynamin-like protein DYNIV-11 variant                                                                                                                                                                                                                                                             |
| 131 | Q5CAQ7           | 23                   | 309            | 40.2                  | 854    | 98113  | 5.2 | Heat shock protein HSP 90-alpha 2                                                                                                                                                                                                                                                                 |
| 132 | Q01813           | 23                   | 74             | 38                    | 784    | 85596  | 7.6 | 6-phosphofructokinase type C                                                                                                                                                                                                                                                                      |
| 133 | P43243           | 23                   | 166            | 34.6                  | 847    | 94623  | 6.3 | Matrin-3                                                                                                                                                                                                                                                                                          |
| 134 | P19338-2         | 23                   | 229            | 33.5                  | 687    | 74397  | 4.6 | Isoform 2 of P19338                                                                                                                                                                                                                                                                               |
| 134 | P19338           | 23                   | 229            | 32.4                  | 710    | 76615  | 4.7 | Nucleolin                                                                                                                                                                                                                                                                                         |
| 135 | P63010           | 23                   | 83             | 30.6                  | 937    | 104553 | 5.4 | AP-2 complex subunit beta-1                                                                                                                                                                                                                                                                       |
| 135 | UPI0000456A82    | 23                   | 83             | 30.6                  | 939    | 104711 | 5.4 | AP-2 complex subunit beta-1 (Adapter-related protein complex 2 beta-1 subunit) (Beta-adaptin) (Plasma membrane adaptor HA2/AP2 adaptin beta subunit) (Clathrin assembly protein complex 2 beta large chain) (AP105B).                                                                             |
| 135 | Q3ZB97           | 23                   | 83             | 30.2                  | 951    | 105692 | 5.3 | Ap2b1 protein                                                                                                                                                                                                                                                                                     |
| 135 | UPI0000456A83    | 23                   | 83             | 30.1                  | 953    | 105850 | 5.3 | AP-2 complex subunit beta-1 (Adapter-related protein complex 2 beta-1 subunit) (Beta-adaptin) (Plasma membrane adaptor HA2/AP2 adaptin beta subunit) (Clathrin assembly protein complex 2 beta large chain) (AP105B).                                                                             |
| 136 | Q9BSJ8           | 23                   | 148            | 29.9                  | 1104   | 122856 | 5.8 | Protein FAM62A                                                                                                                                                                                                                                                                                    |
| 136 | Q9BSJ8-2         | 23                   | 148            | 29.6                  | 1114   | 124003 | 5.8 | Isoform 2 of Q9BSJ8                                                                                                                                                                                                                                                                               |
| 137 | UPI000013E942    | 23                   | 117            | 29                    | 905    | 101085 | 6.9 | Hexokinase-1 (EC 2.7.1.1) (Hexokinase type I) (HK I) (Brain form hexokinase).                                                                                                                                                                                                                     |
| 137 | P19367-4         | 23                   | 117            | 29                    | 905    | 101104 | 7   | Isoform 4 of P19367                                                                                                                                                                                                                                                                               |
| 137 | P19367           | 23                   | 117            | 28.6                  | 917    | 102486 | 6.8 | Hexokinase-1                                                                                                                                                                                                                                                                                      |

| No. | Accession Number | Unique Peptide Count | Spectrum Count | Sequence Coverage (%) | Length | MolWt  | pI  | Descriptive Name                                                                                                                                                                                                                    |
|-----|------------------|----------------------|----------------|-----------------------|--------|--------|-----|-------------------------------------------------------------------------------------------------------------------------------------------------------------------------------------------------------------------------------------|
| 138 | UPI0000456DC8    | 23                   | 97             | 27.8                  | 1070   | 123299 | 6.1 | Exportin-1 (Exp1) (Chromosome region maintenance 1 protein homolog).                                                                                                                                                                |
| 138 | O14980           | 23                   | 97             | 27.7                  | 1071   | 123386 | 6.1 | Exportin-1                                                                                                                                                                                                                          |
| 139 | O00410           | 23                   | 121            | 26                    | 1097   | 123630 | 4.9 | Importin beta-3                                                                                                                                                                                                                     |
| 139 | UPI0000163C1C    | 23                   | 121            | 25.6                  | 1115   | 125545 | 4.9 | RAN binding protein 5                                                                                                                                                                                                               |
| 140 | P78347-2         | 23                   | 56             | 26.6                  | 957    | 107970 | 7.9 | Isoform 2 of P78347                                                                                                                                                                                                                 |
| 140 | P78347-4         | 23                   | 56             | 26.1                  | 977    | 110106 | 7.4 | Isoform 4 of P78347                                                                                                                                                                                                                 |
| 140 | P78347-3         | 23                   | 56             | 26.1                  | 978    | 110280 | 6.7 | Isoform 3 of P78347                                                                                                                                                                                                                 |
| 140 | P78347           | 23                   | 56             | 25.6                  | 998    | 112416 | 6.4 | General transcription factor II-I                                                                                                                                                                                                   |
| 141 | P11586           | 23                   | 61             | 25.3                  | 935    | 101559 | 7.3 | C-1-tetrahydrofolate synthase, cytoplasmic (C1-THF synthase) [Includes: Methylenetetrahydrofolate dehydrogenase (EC 1.5.1.5); Methenyltetrahydrofolate cyclohydrolase (EC 3.5.4.9); Formyltetrahydrofolate synthetase (EC 6.3.4.3)] |
| 141 | UPI0000161BEA    | 23                   | 61             | 25.3                  | 935    | 101531 | 7.2 | methylenetetrahydrofolate dehydrogenase 1                                                                                                                                                                                           |
| 142 | Q8IUD2           | 23                   | 38             | 21                    | 1116   | 128086 | 6   | ELKS/RAB6-interacting/CAST family member 1                                                                                                                                                                                          |
| 143 | O95347           | 23                   | 38             | 20.4                  | 1197   | 135780 | 8.6 | Structural maintenance of chromosomes protein 2                                                                                                                                                                                     |
| 143 | UPI0000457786    | 23                   | 38             | 20.4                  | 1195   | 135549 | 8.6 | Structural maintenance of chromosomes protein 2 (Chromosome-associated protein E) (hCAP-E) (XCAP-E homolog).                                                                                                                        |
| 143 | Q6IEE0           | 23                   | 38             | 20.4                  | 1197   | 135656 | 8.4 | SMC2 protein                                                                                                                                                                                                                        |
| 144 | P11047           | 23                   | 51             | 16.7                  | 1609   | 177606 | 5.1 | Laminin subunit gamma-1 precursor                                                                                                                                                                                                   |
| 144 | UPI0000034928    | 23                   | 51             | 16.7                  | 1609   | 177572 | 5.1 | laminin, gamma 1 precursor                                                                                                                                                                                                          |
| 144 | Q5VYE7           | 23                   | 51             | 16.7                  | 1609   | 177602 | 5.1 | Laminin, gamma 1                                                                                                                                                                                                                    |
| 145 | Q14690           | 23                   | 54             | 13.7                  | 1871   | 208699 | 8.9 | RRP5 protein homolog                                                                                                                                                                                                                |
| 146 | Q14980-2         | 23                   | 49             | 13.2                  | 2101   | 236513 | 5.8 | Isoform 2 of Q14980                                                                                                                                                                                                                 |
| 147 | P06733           | 22                   | 486            | 69.1                  | 434    | 47169  | 7.4 | Alpha-enolase                                                                                                                                                                                                                       |
| 147 | Q53FT9           | 22                   | 486            | 69.1                  | 434    | 47197  | 7.4 | Enolase 1 variant                                                                                                                                                                                                                   |
| 148 | P06576           | 22                   | 275            | 63.7                  | 529    | 56560  | 5.4 | ATP synthase subunit beta, mitochondrial precursor                                                                                                                                                                                  |
| 149 | Q02790           | 22                   | 49             | 53.8                  | 459    | 51805  | 5.4 | FK506-binding protein 4                                                                                                                                                                                                             |
| 150 | Q16851           | 22                   | 105            | 50.6                  | 508    | 56940  | 8.1 | UTP--glucose-1-phosphate uridylyltransferase 2                                                                                                                                                                                      |
| 151 | P78371           | 22                   | 113            | 50.1                  | 535    | 57488  | 6.4 | T-complex protein 1 subunit beta                                                                                                                                                                                                    |
| 152 | UPI0000E9BBC7    | 22                   | 93             | 48.8                  | 582    | 64677  | 5.2 | Protein phosphatase 2                                                                                                                                                                                                               |
| 152 | P30153           | 22                   | 93             | 48.2                  | 589    | 65309  | 5.1 | Serine/threonine-protein phosphatase 2A 65 kDa regulatory subunit A alpha isoform                                                                                                                                                   |
| 153 | P17655           | 22                   | 72             | 45.4                  | 700    | 80009  | 5   | Calpain-2 catalytic subunit precursor                                                                                                                                                                                               |
| 153 | UPI000003475E    | 22                   | 72             | 45.4                  | 700    | 80007  | 5   | calpain 2, large subunit                                                                                                                                                                                                            |
| 153 | Q59EF6           | 22                   | 72             | 43.6                  | 729    | 83109  | 5.1 | Calpain 2, large [catalytic] subunit variant                                                                                                                                                                                        |
| 154 | P46063           | 22                   | 69             | 45                    | 649    | 73456  | 8.1 | ATP-dependent DNA helicase Q1                                                                                                                                                                                                       |
| 154 | UPI0000167E2F    | 22                   | 69             | 45                    | 649    | 73457  | 7.9 | RecQ protein-like isoform 1                                                                                                                                                                                                         |
| 155 | P49915           | 22                   | 48             | 40                    | 693    | 76715  | 6.9 | GMP synthase [glutamine-hydrolyzing]                                                                                                                                                                                                |
| 156 | Q15393           | 22                   | 78             | 23.8                  | 1217   | 135577 | 5.3 | Splicing factor 3B subunit 3                                                                                                                                                                                                        |
| 157 | Q7L576           | 22                   | 102            | 19.4                  | 1253   | 145182 | 6.9 | Cytoplasmic FMR1-interacting protein 1                                                                                                                                                                                              |
| 158 | UPI000013F255    | 22                   | 64             | 13.2                  | 1972   | 218524 | 8.1 | colonic and hepatic tumor over-expressed protein isoform b                                                                                                                                                                          |
| 158 | Q0VAX8           | 22                   | 64             | 12.8                  | 2032   | 225493 | 7.8 | Cytoskeleton associated protein 5                                                                                                                                                                                                   |
| 158 | Q14008           | 22                   | 64             | 12.8                  | 2032   | 225507 | 7.9 | Cytoskeleton-associated protein 5                                                                                                                                                                                                   |
| 159 | P46013           | 22                   | 111            | 7.3                   | 3256   | 358695 | 9.4 | Antigen KI-67                                                                                                                                                                                                                       |
| 160 | P08758           | 21                   | 228            | 75                    | 320    | 35937  | 5   | Annexin A5                                                                                                                                                                                                                          |
| 161 | P04075           | 21                   | 223            | 69                    | 364    | 39420  | 8.1 | Fructose-bisphosphate aldolase A                                                                                                                                                                                                    |
| 162 | Q6FI31           | 21                   | 92             | 58.6                  | 497    | 54575  | 6.5 | TXNRD1 protein                                                                                                                                                                                                                      |
| 163 | P68363           | 21                   | 517            | 58.5                  | 451    | 50152  | 5.1 | Tubulin alpha-ubiquitous chain                                                                                                                                                                                                      |
| 164 | P50454           | 21                   | 210            | 54.8                  | 418    | 46441  | 8.7 | Serpin H1 precursor                                                                                                                                                                                                                 |
| 165 | P17987           | 21                   | 67             | 47.1                  | 556    | 60344  | 6.1 | T-complex protein 1 subunit alpha                                                                                                                                                                                                   |
| 166 | P48643           | 21                   | 99             | 45.3                  | 541    | 59671  | 5.6 | T-complex protein 1 subunit epsilon                                                                                                                                                                                                 |
| 167 | P49321           | 21                   | 46             | 41.5                  | 788    | 85238  | 4.3 | Nuclear autoantigenic sperm protein                                                                                                                                                                                                 |
| 168 | P20700           | 21                   | 68             | 39.9                  | 586    | 66408  | 5.2 | Lamin-B1                                                                                                                                                                                                                            |
| 169 | P13010           | 21                   | 120            | 39.8                  | 732    | 82705  | 5.8 | ATP-dependent DNA helicase 2 subunit 2                                                                                                                                                                                              |
| 170 | Q92499           | 21                   | 73             | 37.4                  | 740    | 82432  | 7.2 | ATP-dependent RNA helicase DDX1                                                                                                                                                                                                     |
| 171 | P17844           | 21                   | 114            | 37                    | 614    | 69148  | 8.9 | Probable ATP-dependent RNA helicase DDX5                                                                                                                                                                                            |
| 172 | UPI0000136C97    | 21                   | 180            | 34.3                  | 760    | 84901  | 6.6 | transferrin receptor                                                                                                                                                                                                                |
| 173 | Q1KMD3           | 21                   | 66             | 32.8                  | 747    | 85105  | 4.9 | Heterogeneous nuclear ribonucleoprotein U-like protein 2                                                                                                                                                                            |
| 174 | P49588           | 21                   | 60             | 25.8                  | 968    | 106810 | 5.5 | Alanyl-tRNA synthetase, cytoplasmic                                                                                                                                                                                                 |
| 174 | UPI0000D61A0F    | 21                   | 60             | 25.8                  | 968    | 106710 | 5.5 | Alanyl-tRNA synthetase, cytoplasmic (EC 6.1.1.7) (Alanine--tRNA ligase) (AlaRS) (Renal carcinoma antigen NY-REN-42).                                                                                                                |
| 175 | Q8WUM6           | 21                   | 146            | 26.4                  | 798    | 88415  | 5.4 | Integrin, beta 1                                                                                                                                                                                                                    |
| 175 | Q7Z3V1           | 21                   | 146            | 25.6                  | 823    | 91131  | 5.5 | Integrin beta                                                                                                                                                                                                                       |
| 176 | Q9P2J5           | 21                   | 47             | 22.3                  | 1176   | 134466 | 7.3 | Leucyl-tRNA synthetase, cytoplasmic                                                                                                                                                                                                 |
| 177 | Q14203           | 21                   | 43             | 20.5                  | 1278   | 141694 | 5.8 | Dynactin-1                                                                                                                                                                                                                          |
| 178 | P07942           | 21                   | 46             | 14                    | 1786   | 198065 | 5   | Laminin subunit beta-1 precursor                                                                                                                                                                                                    |
| 179 | Q5T3Q7           | 21                   | 82             | 11.6                  | 2063   | 233274 | 6.6 | Protein BAP28                                                                                                                                                                                                                       |
| 179 | Q9H583           | 21                   | 82             | 11.2                  | 2144   | 242368 | 6.5 | HEAT repeat-containing protein 1                                                                                                                                                                                                    |
| 180 | P04083           | 20                   | 206            | 62.4                  | 346    | 38714  | 7   | Annexin A1                                                                                                                                                                                                                          |
| 181 | P00338           | 20                   | 304            | 62                    | 332    | 36689  | 8.3 | L-lactate dehydrogenase A chain                                                                                                                                                                                                     |
| 182 | P60842           | 20                   | 131            | 57.6                  | 406    | 46154  | 5.5 | Eukaryotic initiation factor 4A-I                                                                                                                                                                                                   |

| No. | Accession Number | Unique Peptide Count | Spectrum Count | Sequence Coverage (%) | Length | MolWt  | pI  | Descriptive Name                                                                                                                                                                                                                                                                                                      |
|-----|------------------|----------------------|----------------|-----------------------|--------|--------|-----|-----------------------------------------------------------------------------------------------------------------------------------------------------------------------------------------------------------------------------------------------------------------------------------------------------------------------|
| 183 | Q59ET3           | 20                   | 103            | 51.6                  | 529    | 57762  | 6.7 | Chaperonin containing TCP1, subunit 6A isoform a variant                                                                                                                                                                                                                                                              |
| 183 | P40227           | 20                   | 103            | 51.4                  | 531    | 58024  | 6.7 | T-complex protein 1 subunit zeta                                                                                                                                                                                                                                                                                      |
| 184 | P08107           | 20                   | 110            | 51.3                  | 641    | 70038  | 5.6 | Heat shock 70 kDa protein 1                                                                                                                                                                                                                                                                                           |
| 184 | UPI000013C67D    | 20                   | 110            | 51.3                  | 641    | 70025  | 5.6 | heat shock 70kDa protein 1B                                                                                                                                                                                                                                                                                           |
| 184 | Q5JQI4           | 20                   | 110            | 51.3                  | 641    | 70052  | 5.6 | Heat shock 70kDa protein 1A                                                                                                                                                                                                                                                                                           |
| 184 | Q59EJ3           | 20                   | 110            | 46.4                  | 709    | 77496  | 6.3 | Heat shock 70kDa protein 1A variant                                                                                                                                                                                                                                                                                   |
| 185 | P50991           | 20                   | 76             | 49                    | 539    | 57924  | 7.8 | T-complex protein 1 subunit delta                                                                                                                                                                                                                                                                                     |
| 186 | P14866           | 20                   | 75             | 48.6                  | 558    | 60187  | 7.1 | Heterogeneous nuclear ribonucleoprotein L                                                                                                                                                                                                                                                                             |
| 186 | Q6NTA2           | 20                   | 75             | 48.6                  | 558    | 60233  | 7.1 | HNRPL protein                                                                                                                                                                                                                                                                                                         |
| 186 | UPI00004432FA    | 20                   | 75             | 46                    | 589    | 64133  | 8.2 | heterogeneous nuclear ribonucleoprotein L isoform a                                                                                                                                                                                                                                                                   |
| 187 | O60701           | 20                   | 33             | 47.4                  | 494    | 55024  | 7.1 | UDP-glucose 6-dehydrogenase                                                                                                                                                                                                                                                                                           |
| 188 | P68104           | 20                   | 615            | 46.1                  | 462    | 50141  | 9   | Elongation factor 1-alpha 1                                                                                                                                                                                                                                                                                           |
| 188 | Q6IPT9           | 20                   | 615            | 46.1                  | 462    | 50185  | 9.1 | Eukaryotic translation elongation factor 1 alpha 1                                                                                                                                                                                                                                                                    |
| 188 | Q6IPN6           | 20                   | 615            | 46.1                  | 462    | 50123  | 9   | Eukaryotic translation elongation factor 1 alpha 1                                                                                                                                                                                                                                                                    |
| 188 | Q5VTE0           | 20                   | 615            | 46.1                  | 462    | 50185  | 9.1 | Eukaryotic translation elongation factor 1 alpha-like 3                                                                                                                                                                                                                                                               |
| 188 | Q53HR5           | 20                   | 615            | 46.1                  | 462    | 50125  | 9   | Eukaryotic translation elongation factor 1 alpha 1 variant                                                                                                                                                                                                                                                            |
| 188 | Q53HQ7           | 20                   | 615            | 46.1                  | 462    | 50199  | 8.9 | Eukaryotic translation elongation factor 1 alpha 1 variant                                                                                                                                                                                                                                                            |
| 188 | Q53HM9           | 20                   | 615            | 46.1                  | 462    | 50142  | 8.9 | Eukaryotic translation elongation factor 1 alpha 1 variant                                                                                                                                                                                                                                                            |
| 188 | Q53G85           | 20                   | 615            | 46.1                  | 462    | 50113  | 9   | Eukaryotic translation elongation factor 1 alpha 1 variant                                                                                                                                                                                                                                                            |
| 189 | UPI0000D6239D    | 20                   | 89             | 45.9                  | 562    | 62865  | 8.4 | Septin-9 (MLL septin-like fusion protein) (MLL septin-like fusion protein MSF-A) (Ovarian/Breast septin) (Ov/Br septin) (Septin D1).                                                                                                                                                                                  |
| 189 | Q9UHD8-2         | 20                   | 89             | 45.4                  | 568    | 63666  | 8.4 | Isoform 2 of Q9UHD8                                                                                                                                                                                                                                                                                                   |
| 189 | Q9UHD8-5         | 20                   | 89             | 44.6                  | 579    | 64682  | 7.6 | Isoform 5 of Q9UHD8                                                                                                                                                                                                                                                                                                   |
| 189 | Q9UHD8           | 20                   | 89             | 44                    | 586    | 65402  | 9   | Septin-9                                                                                                                                                                                                                                                                                                              |
| 190 | UPI0000D6261A    | 20                   | 109            | 40.2                  | 435    | 49917  | 6.7 | Elongation factor 1-gamma (EF-1-gamma) (eEF-1B gamma).                                                                                                                                                                                                                                                                |
| 190 | UPI0000D6261B    | 20                   | 109            | 40.1                  | 436    | 50016  | 6.7 | Elongation factor 1-gamma (EF-1-gamma) (eEF-1B gamma).                                                                                                                                                                                                                                                                |
| 190 | P26641           | 20                   | 109            | 40                    | 437    | 50119  | 6.7 | Elongation factor 1-gamma                                                                                                                                                                                                                                                                                             |
| 191 | Q53FJ5           | 20                   | 103            | 38.2                  | 524    | 58141  | 5.2 | Prosaposin (Variant Gaucher disease and variant metachromatic leukodystrophy) variant                                                                                                                                                                                                                                 |
| 192 | P23246           | 20                   | 102            | 37.5                  | 707    | 76150  | 9.4 | Splicing factor, proline- and glutamine-rich                                                                                                                                                                                                                                                                          |
| 193 | P54136           | 20                   | 46             | 37.1                  | 660    | 75379  | 6.7 | Arginyl-tRNA synthetase, cytoplasmic                                                                                                                                                                                                                                                                                  |
| 194 | O95573           | 20                   | 168            | 35.8                  | 720    | 80420  | 8.4 | Long-chain-fatty-acid--CoA ligase 3                                                                                                                                                                                                                                                                                   |
| 195 | Q99798           | 20                   | 48             | 36.4                  | 780    | 85425  | 7.6 | Aconitate hydratase, mitochondrial precursor                                                                                                                                                                                                                                                                          |
| 195 | Q8TAQ6           | 20                   | 48             | 36.4                  | 780    | 85565  | 7.7 | Aconitase 2, mitochondrial                                                                                                                                                                                                                                                                                            |
| 195 | Q6FHX0           | 20                   | 48             | 36.4                  | 780    | 85467  | 7.5 | ACO2 protein                                                                                                                                                                                                                                                                                                          |
| 195 | A2A274           | 20                   | 48             | 35.3                  | 805    | 87820  | 7.4 | Aconitase 2, mitochondrial                                                                                                                                                                                                                                                                                            |
| 196 | UPI0000161BCB    | 20                   | 68             | 34.7                  | 681    | 76747  | 6.9 | glucosamine-fructose-6-phosphate aminotransferase                                                                                                                                                                                                                                                                     |
| 196 | Q06210-2         | 20                   | 68             | 34.7                  | 681    | 76759  | 6.9 | Isoform 2 of Q06210                                                                                                                                                                                                                                                                                                   |
| 196 | Q06210           | 20                   | 68             | 33.8                  | 699    | 78806  | 7.1 | Glucosamine--fructose-6-phosphate aminotransferase [isomerizing] 1                                                                                                                                                                                                                                                    |
| 197 | P47897           | 20                   | 38             | 31.6                  | 775    | 87799  | 7.2 | Glutamyl-tRNA synthetase                                                                                                                                                                                                                                                                                              |
| 197 | Q53HS0           | 20                   | 38             | 31.6                  | 775    | 87711  | 7.2 | Glutamyl-tRNA synthetase variant                                                                                                                                                                                                                                                                                      |
| 198 | P54886           | 20                   | 65             | 31.1                  | 795    | 87302  | 7.1 | Delta 1-pyrroline-5-carboxylate synthetase (P5CS) (Aldehyde dehydrogenase 18 family member A1) [Includes: Glutamate 5-kinase (EC 2.7.2.11) (Gamma-glutamyl kinase) (GK); Gamma-glutamyl phosphate reductase (GPR) (EC 1.2.1.41) (Glutamate-5-semialdehyde dehydrogenase) (Glutamyl-gamma-semialdehyde dehydrogenase)] |
| 198 | Q5T567           | 20                   | 65             | 31.1                  | 793    | 87089  | 7.1 | Aldehyde dehydrogenase 18 family, member A1                                                                                                                                                                                                                                                                           |
| 199 | Q9GZV0           | 20                   | 33             | 32.2                  | 767    | 85730  | 6.3 | CDNA FLJ12466 fis, clone NT2RM1000826, highly similar to UNR PROTEIN                                                                                                                                                                                                                                                  |
| 199 | O75534-2         | 20                   | 33             | 32.2                  | 767    | 85747  | 6.2 | Isoform Short of O75534                                                                                                                                                                                                                                                                                               |
| 199 | O75534           | 20                   | 33             | 31                    | 798    | 88885  | 6.2 | Cold shock domain-containing protein E1                                                                                                                                                                                                                                                                               |
| 199 | Q68DF1           | 20                   | 33             | 30.4                  | 813    | 90555  | 6.5 | Hypothetical protein DKFZp779B0247                                                                                                                                                                                                                                                                                    |
| 200 | Q15459           | 20                   | 41             | 29.3                  | 793    | 88886  | 5.2 | Splicing factor 3 subunit 1                                                                                                                                                                                                                                                                                           |
| 201 | Q13263           | 20                   | 96             | 29                    | 835    | 88550  | 5.8 | Transcription intermediary factor 1-beta                                                                                                                                                                                                                                                                              |
| 202 | Q99460-2         | 20                   | 45             | 27.8                  | 922    | 102258 | 5.3 | Isoform 2 of Q99460                                                                                                                                                                                                                                                                                                   |
| 202 | Q99460           | 20                   | 45             | 26.9                  | 953    | 105836 | 5.4 | 26S proteasome non-ATPase regulatory subunit 1                                                                                                                                                                                                                                                                        |
| 203 | Q9UDX0           | 20                   | 59             | 24.7                  | 1023   | 115935 | 6.9 | Oxoglutarate (Alpha-ketoglutarate) dehydrogenase                                                                                                                                                                                                                                                                      |
| 204 | O60264           | 20                   | 57             | 19.4                  | 1052   | 121905 | 8.1 | SWI/SNF-related matrix-associated actin-dependent regulator of chromatin subfamily A member 5                                                                                                                                                                                                                         |
| 204 | UPI0000161FA8    | 20                   | 57             | 19.4                  | 1052   | 121933 | 8.1 | SWI/SNF-related matrix-associated actin-dependent regulator of chromatin a5                                                                                                                                                                                                                                           |
| 205 | P29144           | 20                   | 41             | 18.9                  | 1249   | 138349 | 6.3 | Tripeptidyl-peptidase 2                                                                                                                                                                                                                                                                                               |
| 205 | UPI0000137276    | 20                   | 41             | 18.9                  | 1249   | 138449 | 6.4 | tripeptidyl peptidase II                                                                                                                                                                                                                                                                                              |
| 205 | Q5VZU9           | 20                   | 41             | 18.7                  | 1262   | 139765 | 6.5 | Tripeptidyl peptidase II                                                                                                                                                                                                                                                                                              |
| 206 | P62258           | 19                   | 349            | 69.4                  | 255    | 29174  | 4.7 | 14-3-3 protein epsilon                                                                                                                                                                                                                                                                                                |

| No. | Accession Number | Unique Peptide Count | Spectrum Count | Sequence Coverage (%) | Length | MolWt  | pI  | Descriptive Name                                                                                                                                                                                                   |
|-----|------------------|----------------------|----------------|-----------------------|--------|--------|-----|--------------------------------------------------------------------------------------------------------------------------------------------------------------------------------------------------------------------|
| 207 | UPI0000247080    | 19                   | 288            | 64.2                  | 352    | 37298  | 9.1 | Heterogeneous nuclear ribonucleoproteins A2/B1 (hnRNP A2 / hnRNP B1).                                                                                                                                              |
| 207 | P22626           | 19                   | 288            | 64                    | 353    | 37430  | 8.9 | Heterogeneous nuclear ribonucleoproteins A2/B1                                                                                                                                                                     |
| 208 | Q6PIN5           | 19                   | 78             | 61.1                  | 373    | 41681  | 7.5 | PA2G4 protein                                                                                                                                                                                                      |
| 208 | Q9UQ80           | 19                   | 78             | 57.9                  | 394    | 43787  | 6.6 | Proliferation-associated protein 2G4                                                                                                                                                                               |
| 209 | P61158           | 19                   | 88             | 60.8                  | 418    | 47371  | 5.9 | Actin-like protein 3                                                                                                                                                                                               |
| 210 | P62136           | 19                   | 93             | 60.3                  | 330    | 37512  | 6.3 | Serine/threonine-protein phosphatase PP1-alpha catalytic subunit                                                                                                                                                   |
| 211 | Q9HDC9           | 19                   | 50             | 57                    | 416    | 46480  | 6.2 | Adipocyte plasma membrane-associated protein                                                                                                                                                                       |
| 212 | Q53HV2           | 19                   | 76             | 51.9                  | 543    | 59341  | 7.6 | Chaperonin containing TCP1, subunit 7 (Eta) variant                                                                                                                                                                |
| 212 | Q99832           | 19                   | 76             | 51.9                  | 543    | 59367  | 7.6 | T-complex protein 1 subunit eta                                                                                                                                                                                    |
| 213 | Q96124           | 19                   | 42             | 50.9                  | 572    | 61640  | 8.4 | Far upstream element-binding protein 3                                                                                                                                                                             |
| 214 | P37837           | 19                   | 146            | 47.5                  | 337    | 37540  | 6.8 | Transaldolase                                                                                                                                                                                                      |
| 215 | P48444           | 19                   | 66             | 42.7                  | 511    | 57210  | 6.2 | Coatomer subunit delta                                                                                                                                                                                             |
| 215 | UPI000049DD56    | 19                   | 66             | 39.5                  | 552    | 61626  | 5.8 | Coatomer subunit delta (Delta-coat protein) (Delta-COP) (Archain).                                                                                                                                                 |
| 215 | Q6MZV5           | 19                   | 66             | 39.5                  | 552    | 61598  | 5.8 | Hypothetical protein DKFZp686M09245                                                                                                                                                                                |
| 216 | O60568           | 19                   | 81             | 33.6                  | 738    | 84785  | 6.1 | Procollagen-lysine,2-oxoglutarate 5-dioxygenase 3 precursor                                                                                                                                                        |
| 217 | P33993           | 19                   | 32             | 31.4                  | 719    | 81308  | 6.5 | DNA replication licensing factor MCM7                                                                                                                                                                              |
| 218 | P35221           | 19                   | 58             | 29.1                  | 906    | 100071 | 6.3 | Catenin alpha-1                                                                                                                                                                                                    |
| 219 | Q9Y5B9           | 19                   | 76             | 22                    | 1047   | 119914 | 5.7 | FACT complex subunit SPT16                                                                                                                                                                                         |
| 220 | Q13045           | 19                   | 71             | 17.6                  | 1269   | 144751 | 6.1 | Protein flightless-1 homolog                                                                                                                                                                                       |
| 221 | Q5XG74           | 19                   | 84             | 17.7                  | 1106   | 121651 | 6.9 | SEC31 homolog A                                                                                                                                                                                                    |
| 221 | Q17RR5           | 19                   | 84             | 16.3                  | 1205   | 131534 | 6.9 | SEC31 homolog A                                                                                                                                                                                                    |
| 221 | Q9UM05           | 19                   | 84             | 16.1                  | 1220   | 133031 | 6.9 | ABP130                                                                                                                                                                                                             |
| 221 | Q7LCX9           | 19                   | 84             | 16.1                  | 1220   | 133015 | 6.9 | Sec31 protein                                                                                                                                                                                                      |
| 221 | O94979           | 19                   | 84             | 15.9                  | 1229   | 134238 | 7   | SEC31 homolog A                                                                                                                                                                                                    |
| 222 | Q9BQG0           | 19                   | 79             | 15.5                  | 1328   | 148854 | 9.3 | Myb-binding protein 1A                                                                                                                                                                                             |
| 222 | Q9BQG0-2         | 19                   | 79             | 15.5                  | 1332   | 149366 | 9.3 | Isoform 2 of Q9BQG0                                                                                                                                                                                                |
| 223 | Q92616           | 19                   | 74             | 9.7                   | 2671   | 292742 | 7.4 | GCN1-like protein 1                                                                                                                                                                                                |
| 223 | UPI0000451CA7    | 19                   | 74             | 9.7                   | 2671   | 292708 | 7.4 | GCN1 general control of amino-acid synthesis 1-like 1                                                                                                                                                              |
| 224 | P63244           | 18                   | 105            | 75.4                  | 317    | 35077  | 7.7 | Guanine nucleotide-binding protein subunit beta 2-like 1                                                                                                                                                           |
| 224 | Q5VLR4           | 18                   | 105            | 68.9                  | 347    | 37889  | 8.2 | Lung cancer oncogene 7                                                                                                                                                                                             |
| 225 | Q96HG5           | 18                   | 1024           | 67.1                  | 368    | 41005  | 5.8 | Actin, beta                                                                                                                                                                                                        |
| 225 | P60709           | 18                   | 1024           | 65.9                  | 375    | 41737  | 5.5 | Actin, cytoplasmic 1                                                                                                                                                                                               |
| 225 | Q53GK6           | 18                   | 1024           | 65.9                  | 375    | 41723  | 5.5 | Beta actin variant                                                                                                                                                                                                 |
| 225 | Q53G99           | 18                   | 1024           | 65.9                  | 375    | 41765  | 5.6 | Beta actin variant                                                                                                                                                                                                 |
| 225 | Q53G76           | 18                   | 1024           | 65.9                  | 375    | 41721  | 5.5 | Beta actin variant                                                                                                                                                                                                 |
| 225 | P63261           | 18                   | 1024           | 65.9                  | 375    | 41793  | 5.5 | Actin, cytoplasmic 2                                                                                                                                                                                               |
| 226 | P40926           | 18                   | 119            | 65.4                  | 338    | 35531  | 8.7 | Malate dehydrogenase, mitochondrial precursor                                                                                                                                                                      |
| 226 | UPI000013DA68    | 18                   | 119            | 65.4                  | 338    | 35503  | 8.7 | mitochondrial malate dehydrogenase precursor                                                                                                                                                                       |
| 226 | Q6FHZ0           | 18                   | 119            | 65.4                  | 338    | 35559  | 8.7 | MDH2 protein                                                                                                                                                                                                       |
| 227 | P13489           | 18                   | 35             | 61.4                  | 461    | 49974  | 4.8 | Ribonuclease inhibitor                                                                                                                                                                                             |
| 228 | O43852           | 18                   | 191            | 59.4                  | 315    | 37107  | 4.6 | Calumenin precursor                                                                                                                                                                                                |
| 229 | O00231           | 18                   | 44             | 50.9                  | 422    | 47464  | 6.5 | 26S proteasome non-ATPase regulatory subunit 11                                                                                                                                                                    |
| 230 | Q16555           | 18                   | 51             | 49                    | 572    | 62294  | 6.4 | Dihydropyrimidinase-related protein 2                                                                                                                                                                              |
| 230 | Q59GB4           | 18                   | 51             | 44.6                  | 628    | 68184  | 6.2 | Dihydropyrimidinase-like 2 variant                                                                                                                                                                                 |
| 231 | UPI0000126EBE    | 18                   | 119            | 48.4                  | 475    | 51673  | 8   | adenylyl cyclase-associated protein                                                                                                                                                                                |
| 232 | P28838           | 18                   | 39             | 46.1                  | 519    | 56166  | 7.9 | Cytosol aminopeptidase                                                                                                                                                                                             |
| 233 | Q5T6W5           | 18                   | 260            | 47.9                  | 428    | 47557  | 5.6 | Heterogeneous nuclear ribonucleoprotein K                                                                                                                                                                          |
| 233 | P61978-3         | 18                   | 260            | 46.6                  | 440    | 48562  | 5.5 | Isoform 3 of P61978                                                                                                                                                                                                |
| 233 | P61978           | 18                   | 260            | 44.3                  | 463    | 50976  | 5.5 | Heterogeneous nuclear ribonucleoprotein K                                                                                                                                                                          |
| 233 | Q6IBN1           | 18                   | 260            | 44.2                  | 464    | 51028  | 5.3 | HNRPK protein                                                                                                                                                                                                      |
| 234 | Q9Y230           | 18                   | 65             | 41.9                  | 463    | 51157  | 5.6 | RuvB-like 2                                                                                                                                                                                                        |
| 235 | P23526           | 18                   | 63             | 41.4                  | 432    | 47716  | 6.3 | Adenosylhomocysteinase                                                                                                                                                                                             |
| 236 | Q15233           | 18                   | 104            | 41.4                  | 471    | 54232  | 8.9 | Non-POU domain-containing octamer-binding protein (NonO protein) (54 kDa nuclear RNA- and DNA-binding protein) (p54(nrb))                                                                                          |
| 237 | P14868           | 18                   | 32             | 40.3                  | 501    | 57136  | 6.5 | Aspartyl-tRNA synthetase, cytoplasmic                                                                                                                                                                              |
| 238 | O94925           | 18                   | 88             | 39.3                  | 669    | 73461  | 7.8 | Glutaminase kidney isoform, mitochondrial precursor                                                                                                                                                                |
| 238 | UPI0000163E16    | 18                   | 88             | 39.3                  | 669    | 73427  | 7.8 | glutaminase C                                                                                                                                                                                                      |
| 239 | Q96AY3           | 18                   | 56             | 39.2                  | 582    | 64245  | 5.6 | FK506-binding protein 10 precursor                                                                                                                                                                                 |
| 239 | UPI000015C65C    | 18                   | 56             | 39.2                  | 582    | 64305  | 5.6 | FK506 binding protein 10, 65 kDa                                                                                                                                                                                   |
| 240 | P42166           | 18                   | 55             | 37.9                  | 694    | 75492  | 7.7 | Lamina-associated polypeptide 2 isoform alpha (Thymopoietin isoform alpha) (TP alpha) (Thymopoietin-related peptide isoform alpha) (TPRP isoform alpha) [Contains: Thymopoietin (TP) (Splenin); Thymopentin (TP5)] |
| 241 | Q7RTQ9           | 18                   | 29             | 37.4                  | 538    | 61202  | 5.8 | Kinesin light chain 1A                                                                                                                                                                                             |
| 241 | Q7RTQ7           | 18                   | 29             | 36.7                  | 547    | 62192  | 5.7 | Kinesin light chain 1F                                                                                                                                                                                             |
| 241 | Q07866-8         | 18                   | 29             | 36.7                  | 547    | 62302  | 6   | Isoform S of Q07866                                                                                                                                                                                                |
| 241 | Q07866-2         | 18                   | 29             | 36.2                  | 556    | 63293  | 5.9 | Isoform C of Q07866                                                                                                                                                                                                |
| 241 | UPI00004567D3    | 18                   | 29             | 36                    | 559    | 63686  | 5.9 | Kinesin light chain 1 (KLC 1).                                                                                                                                                                                     |
| 241 | Q07866-3         | 18                   | 29             | 35.9                  | 560    | 63796  | 6.4 | Isoform G of Q07866                                                                                                                                                                                                |
| 241 | UPI00004567D1    | 18                   | 29             | 35.4                  | 568    | 64656  | 6.4 | Kinesin light chain 1 (KLC 1).                                                                                                                                                                                     |

| No. | Accession Number | Unique Peptide Count | Spectrum Count | Sequence Coverage (%) | Length | MolWt  | pI  | Descriptive Name                                                                                                                   |
|-----|------------------|----------------------|----------------|-----------------------|--------|--------|-----|------------------------------------------------------------------------------------------------------------------------------------|
| 241 | Q07866           | 18                   | 29             | 35.3                  | 569    | 64786  | 6.3 | Kinesin light chain 1                                                                                                              |
| 241 | UPI0000D62453    | 18                   | 29             | 34.7                  | 579    | 65565  | 6   | Kinesin light chain 1 (KLC 1).                                                                                                     |
| 241 | Q07866-7         | 18                   | 29             | 34.7                  | 580    | 65768  | 6   | Isoform P of Q07866                                                                                                                |
| 241 | Q7RTQ8           | 18                   | 29             | 33.1                  | 607    | 68964  | 7.3 | Kinesin light chain 1O                                                                                                             |
| 241 | Q7RTQ2           | 18                   | 29             | 33                    | 609    | 68762  | 6   | Kinesin light chain 1E                                                                                                             |
| 241 | Q7RTQ3           | 18                   | 29             | 32.7                  | 614    | 69242  | 6   | Kinesin light chain 1D                                                                                                             |
| 241 | UPI0000D62452    | 18                   | 29             | 32.6                  | 616    | 69894  | 7.3 | Kinesin light chain 1 (KLC 1).                                                                                                     |
| 241 | Q7RTQ1           | 18                   | 29             | 32.6                  | 616    | 69954  | 7.1 | Kinesin light chain 1K                                                                                                             |
| 241 | Q7RTQ0           | 18                   | 29             | 32.2                  | 624    | 70496  | 6.8 | Kinesin light chain 1N                                                                                                             |
| 241 | Q07866-6         | 18                   | 29             | 32.2                  | 624    | 70482  | 6.8 | Isoform N of Q07866                                                                                                                |
| 241 | UPI00004567D4    | 18                   | 29             | 31.8                  | 632    | 71342  | 6.8 | Kinesin light chain 1 (KLC 1).                                                                                                     |
| 241 | Q7RTP8           | 18                   | 29             | 31.8                  | 633    | 71487  | 6.7 | Kinesin light chain 1J                                                                                                             |
| 241 | Q07866-4         | 18                   | 29             | 31.8                  | 633    | 71473  | 6.7 | Isoform J of Q07866                                                                                                                |
| 241 | UPI00004567D2    | 18                   | 29             | 31.7                  | 634    | 71744  | 7.8 | Kinesin light chain 1 (KLC 1).                                                                                                     |
| 241 | Q07866-9         | 18                   | 29             | 31.7                  | 635    | 71874  | 7.7 | Isoform I of Q07866                                                                                                                |
| 242 | A2A418           | 18                   | 82             | 34.9                  | 731    | 80641  | 5.8 | Gelsolin                                                                                                                           |
| 242 | P06396           | 18                   | 82             | 32.6                  | 782    | 85697  | 6.3 | Gelsolin precursor                                                                                                                 |
| 243 | Q02809           | 18                   | 71             | 31.4                  | 727    | 83550  | 6.9 | Procollagen-lysine,2-oxoglutarate 5-dioxygenase 1 precursor                                                                        |
| 244 | Q32MZ4-3         | 18                   | 67             | 33.2                  | 752    | 82689  | 4.6 | Isoform 3 of Q32MZ4                                                                                                                |
| 244 | UPI000006DC73    | 18                   | 67             | 31.9                  | 784    | 86438  | 4.7 | leucine rich repeat (in FLII) interacting protein 1                                                                                |
| 244 | Q32MZ4-2         | 18                   | 67             | 31.9                  | 784    | 86404  | 4.7 | Isoform 2 of Q32MZ4                                                                                                                |
| 244 | Q32MZ4           | 18                   | 67             | 30.9                  | 808    | 89253  | 4.7 | Leucine-rich repeat flightless-interacting protein 1                                                                               |
| 245 | Q8NBJ5           | 18                   | 86             | 29.9                  | 622    | 71636  | 7.3 | Glycosyltransferase 25 domain-containing protein 1                                                                                 |
| 246 | Q96AM8           | 18                   | 30             | 29.2                  | 678    | 74762  | 8.4 | Solute carrier family 25 (Mitochondrial carrier, Aralar), member 12                                                                |
| 247 | Q15029           | 18                   | 55             | 26.1                  | 972    | 109436 | 5   | 116 kDa U5 small nuclear ribonucleoprotein component                                                                               |
| 247 | UPI0000169E0D    | 18                   | 55             | 26.1                  | 972    | 109478 | 5   | U5 snRNP-specific protein, 116 kD                                                                                                  |
| 247 | Q6IBM8           | 18                   | 55             | 26.1                  | 972    | 109460 | 5   | U5-116KD protein                                                                                                                   |
| 248 | P25205           | 18                   | 36             | 25.1                  | 808    | 90981  | 5.8 | DNA replication licensing factor MCM3                                                                                              |
| 248 | Q53HJ4           | 18                   | 36             | 25.1                  | 808    | 90981  | 5.7 | Minichromosome maintenance protein 3 variant                                                                                       |
| 249 | P05106           | 18                   | 51             | 25                    | 788    | 87058  | 5.2 | Integrin beta-3 precursor                                                                                                          |
| 250 | P35606           | 18                   | 70             | 24.1                  | 906    | 102487 | 5.3 | Coatomer subunit beta'                                                                                                             |
| 251 | Q43491           | 18                   | 44             | 23.5                  | 1005   | 112588 | 5.4 | Band 4.1-like protein 2                                                                                                            |
| 252 | O60313-8         | 18                   | 33             | 21.1                  | 952    | 110721 | 7.6 | Isoform 8 of O60313                                                                                                                |
| 252 | O60313           | 18                   | 33             | 20.9                  | 960    | 111657 | 7.9 | Dynamin-like 120 kDa protein, mitochondrial precursor (Optic atrophy protein 1) [Contains: Dynamin-like 120 kDa protein, form S1]  |
| 252 | O60313-7         | 18                   | 33             | 20.7                  | 969    | 112524 | 7.5 | Isoform 7 of O60313                                                                                                                |
| 252 | O60313-4         | 18                   | 33             | 20.6                  | 977    | 113460 | 7.8 | Isoform 4 of O60313                                                                                                                |
| 252 | O60313-5         | 18                   | 33             | 20.3                  | 989    | 114975 | 7.6 | Isoform 5 of O60313                                                                                                                |
| 252 | UPI0000422960    | 18                   | 33             | 20.2                  | 997    | 115884 | 7.9 | Dynamin-like 120 kDa protein, mitochondrial precursor (Optic atrophy protein 1) [Contains: Dynamin-like 120 kDa protein, form S1]. |
| 252 | O60313-2         | 18                   | 33             | 20.2                  | 997    | 115911 | 7.9 | Isoform 2 of O60313                                                                                                                |
| 252 | O60313-3         | 18                   | 33             | 20                    | 1006   | 116777 | 7.5 | Isoform 3 of O60313                                                                                                                |
| 252 | O60313-6         | 18                   | 33             | 19.8                  | 1014   | 117713 | 7.8 | Isoform 6 of O60313                                                                                                                |
| 253 | Q9H0A0           | 18                   | 53             | 20                    | 1025   | 115704 | 8.3 | N-acetyltransferase 10                                                                                                             |
| 253 | UPI000015F46F    | 18                   | 53             | 20                    | 1025   | 115748 | 8.3 | N-acetyltransferase-like protein                                                                                                   |
| 253 | UPI000013CF8E    | 18                   | 53             | 20                    | 1025   | 115730 | 8.3 | N-acetyltransferase 10 (EC 2.3.1.-).                                                                                               |
| 254 | P07996           | 18                   | 35             | 17.5                  | 1170   | 129383 | 4.9 | Thrombospondin-1 precursor                                                                                                         |
| 254 | Q59E99           | 18                   | 35             | 16.7                  | 1225   | 134849 | 5   | Thrombospondin 1 variant                                                                                                           |
| 255 | P17301           | 18                   | 55             | 17.5                  | 1181   | 129295 | 5.3 | Integrin alpha-2 precursor                                                                                                         |
| 255 | UPI0000169C36    | 18                   | 55             | 17.5                  | 1181   | 129296 | 5.3 | integrin alpha 2 precursor                                                                                                         |
| 256 | Q68CZ2           | 18                   | 56             | 17.4                  | 1445   | 155237 | 6.8 | Tensin-3                                                                                                                           |
| 256 | UPI0000457557    | 18                   | 56             | 17.4                  | 1445   | 155293 | 6.8 | tensin-like SH2 domain containing 1                                                                                                |
| 256 | UPI00001AE9DA    | 18                   | 56             | 17.4                  | 1445   | 155265 | 6.8 | tensin 3                                                                                                                           |
| 256 | Q8IZW7           | 18                   | 56             | 17.4                  | 1445   | 155277 | 6.8 | Tensin 3                                                                                                                           |
| 257 | Q92900-2         | 18                   | 54             | 17.4                  | 1118   | 123036 | 6.7 | Isoform 2 of Q92900                                                                                                                |
| 257 | Q92900           | 18                   | 54             | 17.3                  | 1129   | 124345 | 6.6 | Regulator of nonsense transcripts 1                                                                                                |
| 258 | O60610           | 18                   | 68             | 16.3                  | 1248   | 138978 | 5.4 | Protein diaphanous homolog 1                                                                                                       |
| 258 | UPI0000EA87E7    | 18                   | 68             | 16.1                  | 1263   | 140289 | 5.4 | diaphanous 1 isoform 2                                                                                                             |
| 258 | UPI0000DBEE89    | 18                   | 68             | 16.1                  | 1263   | 140255 | 5.4 | Protein diaphanous homolog 1 (Diaphanous-related formin-1) (DRF1).                                                                 |
| 258 | UPI0000DBEE88    | 18                   | 68             | 16.1                  | 1264   | 140416 | 5.4 | Protein diaphanous homolog 1 (Diaphanous-related formin-1) (DRF1).                                                                 |
| 258 | Q17RN4           | 18                   | 68             | 16.1                  | 1262   | 140192 | 5.4 | Diaphanous homolog 1                                                                                                               |
| 258 | Q6URC4           | 18                   | 68             | 16                    | 1272   | 141303 | 5.5 | Diaphanous 1                                                                                                                       |
| 258 | Q59FH8           | 18                   | 68             | 15.6                  | 1299   | 143786 | 5.4 | Diaphanous 1 variant                                                                                                               |
| 259 | P60174           | 17                   | 211            | 84.7                  | 249    | 26669  | 6.9 | Triosephosphate isomerase                                                                                                          |
| 260 | P23396           | 17                   | 179            | 74.5                  | 243    | 26688  | 9.7 | 40S ribosomal protein S3                                                                                                           |
| 261 | P23528           | 17                   | 171            | 70.5                  | 166    | 18502  | 8.1 | Cofilin-1                                                                                                                          |
| 262 | P38117           | 17                   | 52             | 58.8                  | 255    | 27844  | 8.1 | Electron transfer flavoprotein subunit beta                                                                                        |
| 263 | P05198           | 17                   | 70             | 57.5                  | 315    | 36112  | 5.1 | Eukaryotic translation initiation factor 2 subunit 1                                                                               |
| 264 | Q5TZT4           | 17                   | 49             | 57.4                  | 350    | 38380  | 5.2 | Unr-interacting protein                                                                                                            |
| 264 | Q9Y3F4           | 17                   | 49             | 57.4                  | 350    | 38438  | 5.1 | Serine-threonine kinase receptor-associated protein                                                                                |
| 264 | Q9NTK0           | 17                   | 49             | 57.4                  | 350    | 38452  | 5.1 | Hypothetical protein DKFZp564N1778                                                                                                 |
| 265 | P05455           | 17                   | 82             | 44.4                  | 408    | 46837  | 7.1 | Lupus La protein                                                                                                                   |

| No. | Accession Number | Unique Peptide Count | Spectrum Count | Sequence Coverage (%) | Length | MolWt  | pI   | Descriptive Name                                                                                                                                                             |
|-----|------------------|----------------------|----------------|-----------------------|--------|--------|------|------------------------------------------------------------------------------------------------------------------------------------------------------------------------------|
| 266 | Q9Y2X3           | 17                   | 49             | 42.5                  | 529    | 59578  | 8.9  | Nucleolar protein NOP5                                                                                                                                                       |
| 267 | P00367           | 17                   | 50             | 38.7                  | 558    | 61398  | 7.8  | Glutamate dehydrogenase 1, mitochondrial precursor                                                                                                                           |
| 268 | Q86UE4           | 17                   | 191            | 36.4                  | 582    | 63837  | 9.3  | Protein LYRIC                                                                                                                                                                |
| 269 | Q53H17           | 17                   | 55             | 35.6                  | 606    | 66228  | 6.7  | WD repeat-containing protein 1 isoform 1 variant                                                                                                                             |
| 269 | Q59ER5           | 17                   | 55             | 34.6                  | 624    | 68171  | 7.2  | WD repeat-containing protein 1 isoform 1 variant                                                                                                                             |
| 270 | P13797           | 17                   | 32             | 35.1                  | 627    | 70436  | 5.8  | Plastin-3                                                                                                                                                                    |
| 270 | UPI000000D962    | 17                   | 32             | 34.9                  | 630    | 70811  | 5.6  | plastin 3                                                                                                                                                                    |
| 271 | Q86UX7-2         | 17                   | 38             | 34.2                  | 663    | 75430  | 6.8  | Isoform 2 of Q86UX7                                                                                                                                                          |
| 271 | Q86UX7           | 17                   | 38             | 34                    | 667    | 75953  | 7    | Unc-112-related protein 2                                                                                                                                                    |
| 272 | UPI0000378489    | 17                   | 93             | 33.3                  | 525    | 59178  | 4.4  | protein kinase C substrate 80K-H isoform 2                                                                                                                                   |
| 273 | Q53HQ1           | 17                   | 83             | 31.6                  | 564    | 66696  | 6.2  | Eukaryotic translation initiation factor 3 subunit 6 interacting protein variant                                                                                             |
| 273 | Q9Y262           | 17                   | 83             | 31.6                  | 564    | 66727  | 6.3  | Eukaryotic translation initiation factor 3 subunit 6-interacting protein                                                                                                     |
| 273 | Q5QTR1           | 17                   | 83             | 31.6                  | 564    | 66739  | 6.3  | MSTP005                                                                                                                                                                      |
| 273 | Q53HT4           | 17                   | 83             | 31.6                  | 564    | 66753  | 6.3  | Eukaryotic translation initiation factor 3 subunit 6 interacting protein variant                                                                                             |
| 273 | Q6ICD2           | 17                   | 83             | 29.3                  | 607    | 70902  | 6.7  | DJ1014D13.1 protein                                                                                                                                                          |
| 274 | Q15436           | 17                   | 73             | 30.6                  | 765    | 86161  | 7.1  | Protein transport protein Sec23A                                                                                                                                             |
| 275 | UPI0000161B4F    | 17                   | 77             | 32                    | 685    | 77531  | 6.2  | Glycyl-tRNA synthetase (EC 6.1.1.14) (Glycine--tRNA ligase) (GlyRS).                                                                                                         |
| 275 | P41250           | 17                   | 77             | 29.6                  | 739    | 83140  | 7    | Glycyl-tRNA synthetase                                                                                                                                                       |
| 275 | UPI00005A885C    | 17                   | 77             | 29.6                  | 739    | 83166  | 7    | glycyl-tRNA synthetase                                                                                                                                                       |
| 275 | UPI0000D61C1A    | 17                   | 77             | 29.2                  | 749    | 84392  | 7.5  | Glycyl-tRNA synthetase (EC 6.1.1.14) (Glycine--tRNA ligase) (GlyRS).                                                                                                         |
| 276 | Q16643           | 17                   | 43             | 28.7                  | 649    | 71425  | 4.5  | Drebrin                                                                                                                                                                      |
| 276 | UPI0000457394    | 17                   | 43             | 28.7                  | 649    | 71429  | 4.5  | Drebrin (Developmentally-regulated brain protein).                                                                                                                           |
| 276 | UPI000013E0B5    | 17                   | 43             | 28.7                  | 649    | 71439  | 4.5  | drebrin 1 isoform a                                                                                                                                                          |
| 277 | Q16666-2         | 17                   | 59             | 27.6                  | 729    | 82096  | 9.3  | Isoform 2 of Q16666                                                                                                                                                          |
| 277 | Q16666           | 17                   | 59             | 25.6                  | 785    | 88256  | 9.3  | Gamma-interferon-inducible protein Irfi-16                                                                                                                                   |
| 278 | P11387           | 17                   | 58             | 24.2                  | 765    | 90726  | 9.3  | DNA topoisomerase 1                                                                                                                                                          |
| 279 | Q9NSE4           | 17                   | 55             | 21.5                  | 1012   | 113791 | 7.2  | Isoleucyl-tRNA synthetase, mitochondrial precursor                                                                                                                           |
| 280 | A1KYQ7           | 17                   | 75             | 21.2                  | 913    | 105404 | 5.7  | Cell migration-inducing protein 17                                                                                                                                           |
| 280 | Q99613           | 17                   | 75             | 21.2                  | 913    | 105344 | 5.7  | Eukaryotic translation initiation factor 3 subunit 8                                                                                                                         |
| 281 | UPI0000136781    | 17                   | 106            | 20.2                  | 955    | 108694 | 10.2 | thyroid hormone receptor associated protein 3                                                                                                                                |
| 282 | O95373           | 17                   | 126            | 19.7                  | 1038   | 119516 | 4.8  | Importin-7                                                                                                                                                                   |
| 282 | UPI0000D625B4    | 17                   | 126            | 19.6                  | 1040   | 119702 | 4.8  | Importin-7 (Imp7) (Ran-binding protein 7) (RanBP7).                                                                                                                          |
| 283 | O60841           | 17                   | 51             | 14.8                  | 1220   | 138799 | 5.5  | Eukaryotic translation initiation factor 5B                                                                                                                                  |
| 283 | UPI0000D61206    | 17                   | 51             | 14.8                  | 1220   | 138681 | 5.6  | Eukaryotic translation initiation factor 5B (eIF-5B) (Translation initiation factor IF-2).                                                                                   |
| 283 | UPI0000207EC7    | 17                   | 51             | 14.8                  | 1220   | 138827 | 5.5  | eukaryotic translation initiation factor 5B                                                                                                                                  |
| 283 | Q8N5A0           | 17                   | 51             | 14.8                  | 1220   | 138800 | 5.5  | Eukaryotic translation initiation factor 5B                                                                                                                                  |
| 284 | Q92878           | 17                   | 22             | 13.7                  | 1312   | 153892 | 6.9  | DNA repair protein RAD50                                                                                                                                                     |
| 284 | UPI000045733E    | 17                   | 22             | 13.7                  | 1311   | 153750 | 6.9  | DNA repair protein RAD50 (EC 3.6.-.-) (hRAD50).                                                                                                                              |
| 284 | Q92878-2         | 17                   | 22             | 13.7                  | 1318   | 154587 | 6.9  | Isoform 2 of Q92878                                                                                                                                                          |
| 285 | P26358           | 17                   | 42             | 13                    | 1616   | 183164 | 7.8  | DNA (cytosine-5)-methyltransferase 1                                                                                                                                         |
| 285 | A0AV63           | 17                   | 42             | 12.9                  | 1632   | 184818 | 7.9  | DNMT1 protein                                                                                                                                                                |
| 286 | UPI0000D626C7    | 17                   | 37             | 3.9                   | 5300   | 606141 | 5.4  | Microtubule-actin cross-linking factor 1, isoforms 1/2/3/5 (Actin cross-linking family protein 7) (Macrophin-1) (Trabeculin-alpha) (620 kDa actin-binding protein) (ABP620). |
| 286 | Q9UPN3           | 17                   | 37             | 3.8                   | 5430   | 620426 | 5.4  | Microtubule-actin cross-linking factor 1, isoforms 1/2/3/5                                                                                                                   |
| 286 | UPI0000D626C8    | 17                   | 37             | 3.8                   | 5374   | 614212 | 5.4  | Microtubule-actin cross-linking factor 1, isoforms 1/2/3/5 (Actin cross-linking family protein 7) (Macrophin-1) (Trabeculin-alpha) (620 kDa actin-binding protein) (ABP620). |
| 286 | UPI00004578EC    | 17                   | 37             | 3.8                   | 5430   | 620397 | 5.4  | Microtubule-actin cross-linking factor 1, isoforms 1/2/3/5 (Actin cross-linking family protein 7) (Macrophin-1) (Trabeculin-alpha) (620 kDa actin-binding protein) (ABP620). |
| 286 | Q9UPN3-1         | 17                   | 37             | 3.8                   | 5374   | 614160 | 5.4  | Isoform 1 of Q9UPN3                                                                                                                                                          |
| 287 | P21796           | 16                   | 168            | 70.7                  | 283    | 30773  | 8.5  | Voltage-dependent anion-selective channel protein 1                                                                                                                          |
| 288 | P35232           | 16                   | 94             | 68.8                  | 272    | 29804  | 5.8  | Prohibitin                                                                                                                                                                   |
| 288 | Q6FHP5           | 16                   | 94             | 68.8                  | 272    | 29832  | 5.8  | PHB protein                                                                                                                                                                  |
| 289 | Q9HB71           | 16                   | 46             | 63.2                  | 228    | 26210  | 8.2  | Calcyclin-binding protein                                                                                                                                                    |
| 290 | P09525           | 16                   | 68             | 53.9                  | 319    | 35883  | 6.1  | Annexin A4                                                                                                                                                                   |
| 291 | UPI0000D62378    | 16                   | 53             | 50.5                  | 402    | 45292  | 8.2  | 26S protease regulatory subunit 8 (Proteasome 26S subunit ATPase 5) (Proteasome subunit p45) (p45/SUG) (Thyroid hormone receptor- interacting protein 1) (TRIP1).            |
| 291 | P62195           | 16                   | 53             | 50                    | 406    | 45626  | 7.5  | 26S protease regulatory subunit 8                                                                                                                                            |
| 292 | UPI00006D1D75    | 16                   | 138            | 57.5                  | 320    | 34223  | 9.2  | Heterogeneous nuclear ribonucleoprotein A1 (Helix-destabilizing protein) (Single-strand RNA-binding protein) (hnRNP core protein A1).                                        |
| 292 | P49312           | 16                   | 138            | 57.5                  | 320    | 34196  | 9.2  | Heterogeneous nuclear ribonucleoprotein A1                                                                                                                                   |
| 292 | P09651           | 16                   | 138            | 49.5                  | 372    | 38846  | 9.2  | Heterogeneous nuclear ribonucleoprotein A1                                                                                                                                   |

| No. | Accession Number | Unique Peptide Count | Spectrum Count | Sequence Coverage (%) | Length | MolWt  | pI   | Descriptive Name                                                                                                                  |
|-----|------------------|----------------------|----------------|-----------------------|--------|--------|------|-----------------------------------------------------------------------------------------------------------------------------------|
| 292 | UPI0000161BF2    | 16                   | 138            | 49.5                  | 372    | 38747  | 9.1  | heterogeneous nuclear ribonucleoprotein A1 isoform b                                                                              |
| 293 | P62333           | 16                   | 42             | 45.8                  | 389    | 44173  | 7.5  | 26S protease regulatory subunit S10B                                                                                              |
| 294 | P62495           | 16                   | 34             | 43                    | 437    | 49031  | 5.7  | Eukaryotic peptide chain release factor subunit 1                                                                                 |
| 295 | P35241           | 16                   | 81             | 37.4                  | 583    | 68564  | 6.4  | Radixin                                                                                                                           |
| 296 | O15355           | 16                   | 54             | 36.4                  | 546    | 59272  | 4.4  | Protein phosphatase 2C isoform gamma                                                                                              |
| 297 | P06744           | 16                   | 87             | 33.3                  | 558    | 63147  | 8.3  | Glucose-6-phosphate isomerase                                                                                                     |
| 298 | P21980           | 16                   | 40             | 32.5                  | 687    | 77329  | 5.2  | Protein-glutamine gamma-glutamyltransferase 2 (EC 2.3.2.13) (Tissue transglutaminase) (TGase C) (TGC) (TG(C))                     |
| 299 | O00567           | 16                   | 47             | 32                    | 594    | 66050  | 9.2  | Nucleolar protein Nop56                                                                                                           |
| 300 | Q03252           | 16                   | 54             | 31.2                  | 600    | 67689  | 5.3  | Lamin-B2                                                                                                                          |
| 301 | Q14247           | 16                   | 57             | 30.5                  | 550    | 61636  | 5.4  | Src substrate cortactin                                                                                                           |
| 301 | UPI0000D62647    | 16                   | 57             | 30.5                  | 551    | 61762  | 5.4  | Src substrate cortactin (Amplixin) (Oncogene EMS1).                                                                               |
| 301 | UPI000013D657    | 16                   | 57             | 30.5                  | 550    | 61586  | 5.4  | cortactin isoform a                                                                                                               |
| 301 | Q53HG7           | 16                   | 57             | 30.5                  | 550    | 61558  | 5.4  | Cortactin isoform a variant                                                                                                       |
| 302 | P07384           | 16                   | 29             | 25.9                  | 714    | 81890  | 5.7  | Calpain-1 catalytic subunit                                                                                                       |
| 302 | Q6DHV4           | 16                   | 29             | 25.9                  | 714    | 81831  | 5.6  | CAPN1 protein                                                                                                                     |
| 303 | Q92973           | 16                   | 37             | 24.8                  | 890    | 101310 | 5    | Transportin-1                                                                                                                     |
| 303 | UPI000020CAB6    | 16                   | 37             | 24.6                  | 898    | 102355 | 5    | transportin 1 isoform 1                                                                                                           |
| 304 | P50570-2         | 16                   | 32             | 23.8                  | 866    | 97652  | 7.6  | Isoform 2 of P50570                                                                                                               |
| 304 | P50570           | 16                   | 32             | 23.7                  | 870    | 98064  | 7.5  | Dynamin-2                                                                                                                         |
| 305 | P55265-3         | 16                   | 37             | 15.9                  | 1181   | 131099 | 8.6  | Isoform 3 of P55265                                                                                                               |
| 305 | P55265-2         | 16                   | 37             | 15.7                  | 1200   | 133203 | 8.5  | Isoform 2 of P55265                                                                                                               |
| 305 | P55265           | 16                   | 37             | 15.3                  | 1226   | 135995 | 8.6  | Double-stranded RNA-specific adenosine deaminase                                                                                  |
| 305 | Q59EC0           | 16                   | 37             | 15.1                  | 1244   | 137833 | 8.5  | Adenosine deaminase, RNA-specific isoform ADAR-a variant                                                                          |
| 306 | P52701           | 16                   | 50             | 14.5                  | 1360   | 152785 | 6.9  | DNA mismatch repair protein MSH6                                                                                                  |
| 307 | Q9UKK3           | 16                   | 31             | 10.3                  | 1724   | 192587 | 5.7  | Poly [ADP-ribose] polymerase 4 (EC 2.4.2.30) (PARP-4) (Vault poly(ADP-ribose) polymerase)                                         |
| 308 | Q07954           | 16                   | 41             | 3.8                   | 4544   | 504579 | 5.4  | Low-density lipoprotein receptor-related protein 1 precursor                                                                      |
| 308 | UPI00001B044F    | 16                   | 41             | 3.8                   | 4544   | 504610 | 5.4  | low density lipoprotein-related protein 1                                                                                         |
| 309 | P61106           | 15                   | 106            | 84.7                  | 215    | 23897  | 6.2  | Ras-related protein Rab-14                                                                                                        |
| 310 | P51149           | 15                   | 148            | 77.8                  | 207    | 23490  | 6.7  | Ras-related protein Rab-7a                                                                                                        |
| 311 | P51858           | 15                   | 53             | 70                    | 240    | 26788  | 4.7  | Hepatoma-derived growth factor                                                                                                    |
| 312 | P12004           | 15                   | 101            | 66.7                  | 261    | 28769  | 4.7  | Proliferating cell nuclear antigen                                                                                                |
| 313 | P16152           | 15                   | 48             | 65.3                  | 277    | 30375  | 8.3  | Carbonyl reductase [NADPH] 1 (EC 1.1.1.184) (NADPH-dependent carbonyl reductase 1) (Prostaglandin-E(2) 9-reductase)               |
| 314 | P63104           | 15                   | 421            | 65.3                  | 245    | 27745  | 4.8  | 14-3-3 protein zeta/delta                                                                                                         |
| 315 | UPI00001AF1AB    | 15                   | 39             | 58.4                  | 389    | 42931  | 5.3  | Interleukin enhancer-binding factor 2 (Nuclear factor of activated T- cells 45 kDa).                                              |
| 315 | Q12905           | 15                   | 39             | 58.2                  | 390    | 43062  | 5.3  | Interleukin enhancer-binding factor 2                                                                                             |
| 316 | P62701           | 15                   | 135            | 55.1                  | 263    | 29598  | 10.2 | 40S ribosomal protein S4, X isoform                                                                                               |
| 317 | Q99623           | 15                   | 73             | 54.8                  | 299    | 33296  | 9.8  | Prohibitin-2                                                                                                                      |
| 318 | Q6QA25           | 15                   | 99             | 50.8                  | 248    | 29033  | 4.8  | Tropomyosin 3                                                                                                                     |
| 318 | UPI000020489E    | 15                   | 99             | 50.8                  | 248    | 29079  | 4.8  | Tropomyosin alpha-3 chain (Tropomyosin-3) (Tropomyosin gamma) (hTM5).                                                             |
| 319 | P07195           | 15                   | 292            | 46.1                  | 334    | 36639  | 6.1  | L-lactate dehydrogenase B chain                                                                                                   |
| 320 | P43034           | 15                   | 34             | 45.9                  | 410    | 46638  | 7.4  | Platelet-activating factor acetylhydrolase IB subunit alpha                                                                       |
| 321 | P52209           | 15                   | 46             | 44.9                  | 483    | 53140  | 7.2  | 6-phosphogluconate dehydrogenase, decarboxylating                                                                                 |
| 322 | Q15942           | 15                   | 57             | 44.2                  | 572    | 61277  | 6.7  | Zyxin                                                                                                                             |
| 323 | O00232           | 15                   | 28             | 41                    | 456    | 52904  | 7.6  | 26S proteasome non-ATPase regulatory subunit 12                                                                                   |
| 324 | Q53GL9           | 15                   | 74             | 41.1                  | 428    | 49019  | 5.8  | HLA-B associated transcript 1 variant                                                                                             |
| 324 | Q13838           | 15                   | 74             | 41.1                  | 428    | 48991  | 5.7  | Spliceosome RNA helicase BAT1                                                                                                     |
| 324 | Q0EFA1           | 15                   | 74             | 39.7                  | 443    | 50679  | 5.9  | BAT1 protein                                                                                                                      |
| 325 | Q15008           | 15                   | 52             | 39.1                  | 389    | 45531  | 5.6  | 26S proteasome non-ATPase regulatory subunit 6                                                                                    |
| 326 | Q6DD88           | 15                   | 49             | 38.4                  | 541    | 60542  | 5.7  | DKFZP564J0863 protein                                                                                                             |
| 327 | Q96AE4           | 15                   | 46             | 35.1                  | 644    | 67560  | 7.6  | Far upstream element-binding protein 1                                                                                            |
| 327 | UPI00004561FD    | 15                   | 46             | 34.7                  | 651    | 68491  | 7.3  | Far upstream element-binding protein 1 (FUSE-binding protein 1) (FBP) (DNA helicase V) (HDH V).                                   |
| 327 | Q96AE4-2         | 15                   | 46             | 34.6                  | 653    | 68605  | 7.3  | Isoform 2 of Q96AE4                                                                                                               |
| 327 | UPI000059CFF9    | 15                   | 46             | 34.5                  | 655    | 68904  | 7.9  | Far upstream element-binding protein 1 (FUSE-binding protein 1) (FBP) (DNA helicase V) (HDH V).                                   |
| 328 | UPI00003670EA    | 15                   | 39             | 34                    | 729    | 80255  | 8.3  | Probable ATP-dependent RNA helicase DDX17 (EC 3.6.1.-) (DEAD box protein 17) (RNA-dependent helicase p72) (DEAD box protein p72). |
| 328 | UPI000021BFBA    | 15                   | 39             | 34                    | 729    | 80273  | 8.3  | DEAD box polypeptide 17 isoform p82                                                                                               |
| 328 | Q59F66           | 15                   | 39             | 33.6                  | 737    | 81068  | 7.9  | DEAD box polypeptide 17 isoform p82 variant                                                                                       |
| 329 | Q53G58           | 15                   | 44             | 31.6                  | 474    | 53281  | 7.1  | Coronin, actin binding protein, 1C variant                                                                                        |
| 329 | Q9ULV4           | 15                   | 44             | 31.6                  | 474    | 53249  | 7.1  | Coronin-1C                                                                                                                        |
| 330 | Q15046           | 15                   | 46             | 27.1                  | 597    | 68048  | 6.4  | Lysyl-tRNA synthetase                                                                                                             |
| 330 | UPI00001405CB    | 15                   | 46             | 25.9                  | 625    | 71497  | 6.8  | Lysyl-tRNA synthetase (EC 6.1.1.6) (Lysine--tRNA ligase) (LysRS).                                                                 |



| No. | Accession Number | Unique Peptide Count | Spectrum Count | Sequence Coverage (%) | Length | MolWt  | pI  | Descriptive Name                                                                                                                                                                                                                                                                                                                                                                                                                                                         |
|-----|------------------|----------------------|----------------|-----------------------|--------|--------|-----|--------------------------------------------------------------------------------------------------------------------------------------------------------------------------------------------------------------------------------------------------------------------------------------------------------------------------------------------------------------------------------------------------------------------------------------------------------------------------|
| 330 | Q9HB23           | 15                   | 46             | 25.9                  | 625    | 71384  | 6.7 | Lysyl-tRNA synthetase                                                                                                                                                                                                                                                                                                                                                                                                                                                    |
| 331 | Q08J23           | 15                   | 41             | 27                    | 767    | 86499  | 6.9 | Putative 5-methylcytosine methyltransferase                                                                                                                                                                                                                                                                                                                                                                                                                              |
| 331 | UPI000020BF2B    | 15                   | 41             | 27                    | 767    | 86471  | 6.8 | NOL1/NOP2/Sun domain family 2 protein                                                                                                                                                                                                                                                                                                                                                                                                                                    |
| 332 | P06737           | 15                   | 39             | 26.1                  | 847    | 97149  | 7.2 | Glycogen phosphorylase, liver form                                                                                                                                                                                                                                                                                                                                                                                                                                       |
| 332 | UPI0000D62406    | 15                   | 39             | 26                    | 849    | 97334  | 7.2 | Glycogen phosphorylase, liver form (EC 2.4.1.1).                                                                                                                                                                                                                                                                                                                                                                                                                         |
| 333 | Q96PK6           | 15                   | 24             | 25                    | 669    | 69492  | 9.7 | RNA-binding protein 14                                                                                                                                                                                                                                                                                                                                                                                                                                                   |
| 334 | UPI0000D62355    | 15                   | 26             | 24                    | 739    | 82092  | 6.8 | Vesicle-fusing ATPase (EC 3.6.4.6) (Vesicular-fusion protein NSF) (N-ethylmaleimide sensitive fusion protein) (NEM-sensitive fusion protein).                                                                                                                                                                                                                                                                                                                            |
| 334 | P46459           | 15                   | 26             | 23.8                  | 744    | 82560  | 7   | Vesicle-fusing ATPase                                                                                                                                                                                                                                                                                                                                                                                                                                                    |
| 335 | P08582           | 15                   | 41             | 23.2                  | 738    | 80242  | 6   | Melanotransferrin precursor                                                                                                                                                                                                                                                                                                                                                                                                                                              |
| 335 | UPI000013E329    | 15                   | 41             | 23.2                  | 738    | 80215  | 5.9 | melanoma-associated antigen p97 isoform 1, precursor                                                                                                                                                                                                                                                                                                                                                                                                                     |
| 336 | P23921           | 15                   | 29             | 21.8                  | 792    | 90070  | 7.1 | Ribonucleoside-diphosphate reductase large subunit                                                                                                                                                                                                                                                                                                                                                                                                                       |
| 336 | Q53GZ5           | 15                   | 29             | 21.8                  | 792    | 89972  | 7.3 | Ribonucleoside-diphosphate reductase M1 chain variant                                                                                                                                                                                                                                                                                                                                                                                                                    |
| 337 | Q9Y6C2           | 15                   | 36             | 20.8                  | 1016   | 106695 | 5.2 | EMILIN-1 precursor                                                                                                                                                                                                                                                                                                                                                                                                                                                       |
| 338 | Q13435           | 15                   | 45             | 20.2                  | 872    | 97657  | 5.7 | Splicing factor 3B subunit 2                                                                                                                                                                                                                                                                                                                                                                                                                                             |
| 338 | Q7Z627           | 15                   | 45             | 20.1                  | 877    | 98116  | 5.5 | SF3B2 protein                                                                                                                                                                                                                                                                                                                                                                                                                                                            |
| 338 | Q9BWD2           | 15                   | 45             | 19.7                  | 894    | 100097 | 5.7 | SF3B2 protein                                                                                                                                                                                                                                                                                                                                                                                                                                                            |
| 339 | Q6NT74           | 15                   | 59             | 19.8                  | 812    | 92194  | 5.8 | ARS2 protein                                                                                                                                                                                                                                                                                                                                                                                                                                                             |
| 339 | Q9BXP5-2         | 15                   | 59             | 18.5                  | 872    | 100276 | 6   | Isoform B of Q9BXP5                                                                                                                                                                                                                                                                                                                                                                                                                                                      |
| 339 | Q32MI4           | 15                   | 59             | 18.5                  | 871    | 100147 | 6   | ARS2 protein                                                                                                                                                                                                                                                                                                                                                                                                                                                             |
| 339 | A4D2E5           | 15                   | 59             | 18.4                  | 875    | 100537 | 6   | Arsenate resistance protein ARS2                                                                                                                                                                                                                                                                                                                                                                                                                                         |
| 339 | Q9BXP5           | 15                   | 59             | 18.4                  | 876    | 100667 | 6   | Arsenite-resistance protein 2                                                                                                                                                                                                                                                                                                                                                                                                                                            |
| 339 | UPI000013C800    | 15                   | 59             | 18.2                  | 884    | 101567 | 6.1 | Arsenite-resistance protein 2.                                                                                                                                                                                                                                                                                                                                                                                                                                           |
| 340 | Q9Y2L1           | 15                   | 32             | 18.3                  | 958    | 109003 | 7.1 | Exosome complex exonuclease RRP44                                                                                                                                                                                                                                                                                                                                                                                                                                        |
| 340 | UPI00001610C4    | 15                   | 32             | 18.3                  | 958    | 108976 | 7.1 | KIAA1008                                                                                                                                                                                                                                                                                                                                                                                                                                                                 |
| 340 | UPI0000D61A7F    | 15                   | 32             | 18.2                  | 960    | 109187 | 7.1 | Exosome complex exonuclease RRP44 (EC 3.1.13.-) (Ribosomal RNA- processing protein 44) (DIS3 protein homolog).                                                                                                                                                                                                                                                                                                                                                           |
| 341 | P22102           | 15                   | 47             | 17.9                  | 1010   | 107767 | 6.7 | Trifunctional purine biosynthetic protein adenosine-3 [Includes: Phosphoribosylamine-glycine ligase (EC 6.3.4.13) (GARS) (Glycinamide ribonucleotide synthetase) (Phosphoribosylglycinamide synthetase); Phosphoribosylformylglycinamide cyclo-ligase (EC 6.3.3.1) (AIRS) (Phosphoribosyl-aminoimidazole synthetase) (AIR synthase); Phosphoribosylglycinamide formyltransferase (EC 2.1.2.2) (GART) (GAR transformylase) (5'-phosphoribosylglycinamide transformylase)] |
| 341 | Q3B7A7           | 15                   | 47             | 17.9                  | 1010   | 107723 | 6.8 | Phosphoribosylglycinamide formyltransferase, phosphoribosylglycinamide synthetase, phosphoribosylaminoimidazole synthetase                                                                                                                                                                                                                                                                                                                                               |
| 341 | Q59HH3           | 15                   | 47             | 17.3                  | 1046   | 112138 | 7.4 | Phosphoribosylglycinamide formyltransferase, phosphoribosylglycinamide synthetase, phosphoribosylaminoimidazole synthetase isoform 1 variant                                                                                                                                                                                                                                                                                                                             |
| 342 | Q5T665           | 15                   | 81             | 17.9                  | 956    | 106077 | 8.3 | Inter-alpha inhibitor H5                                                                                                                                                                                                                                                                                                                                                                                                                                                 |
| 342 | UPI00003B5D4F    | 15                   | 81             | 17.9                  | 956    | 106017 | 8.3 | inter-alpha trypsin inhibitor heavy chain precursor 5 isoform 1                                                                                                                                                                                                                                                                                                                                                                                                          |
| 343 | P26006-2         | 15                   | 47             | 17.9                  | 1051   | 116612 | 6.8 | Isoform Alpha                                                                                                                                                                                                                                                                                                                                                                                                                                                            |
| 343 | P26006           | 15                   | 47             | 17.6                  | 1066   | 118698 | 7   | Integrin alpha-3 precursor (Galactoprotein B3) (GAPB3) (VLA-3 alpha chain) (FRP-2) (CD49c antigen) [Contains: Integrin alpha-3 heavy chain; Integrin alpha-3 light chain]                                                                                                                                                                                                                                                                                                |
| 343 | UPI0000140781    | 15                   | 47             | 17.6                  | 1066   | 118756 | 7   | integrin alpha 3 isoform b, precursor                                                                                                                                                                                                                                                                                                                                                                                                                                    |
| 344 | Q2NKKW9          | 15                   | 39             | 18.4                  | 869    | 98150  | 7   | Eukaryotic translation initiation factor 4 gamma, 2                                                                                                                                                                                                                                                                                                                                                                                                                      |
| 344 | P78344           | 15                   | 39             | 17.6                  | 907    | 102362 | 7.1 | Eukaryotic translation initiation factor 4 gamma 2                                                                                                                                                                                                                                                                                                                                                                                                                       |
| 344 | UPI000013C8BE    | 15                   | 39             | 17.6                  | 907    | 102330 | 7.1 | Eukaryotic translation initiation factor 4 gamma 2 (eIF-4-gamma 2) (eIF-4G 2) (eIF4G 2) (p97) (Death-associated protein 5) (DAP-5).                                                                                                                                                                                                                                                                                                                                      |
| 344 | Q49A79           | 15                   | 39             | 17.6                  | 907    | 102389 | 7.1 | Eukaryotic translation initiation factor 4 gamma, 2                                                                                                                                                                                                                                                                                                                                                                                                                      |
| 344 | Q0VH01           | 15                   | 39             | 17.6                  | 907    | 102335 | 7.1 | Eukaryotic translation initiation factor 4 gamma, 2                                                                                                                                                                                                                                                                                                                                                                                                                      |
| 344 | Q59G42           | 15                   | 39             | 17                    | 940    | 105828 | 7.4 | Eukaryotic translation initiation factor 4 gamma, 2 variant                                                                                                                                                                                                                                                                                                                                                                                                              |
| 345 | P23229-4         | 15                   | 32             | 18.1                  | 1068   | 119074 | 7.3 | Isoform Alpha                                                                                                                                                                                                                                                                                                                                                                                                                                                            |
| 345 | Q53RX7           | 15                   | 32             | 18                    | 1073   | 119476 | 6.8 | Hypothetical protein ITGA6                                                                                                                                                                                                                                                                                                                                                                                                                                               |
| 345 | P23229-2         | 15                   | 32             | 18                    | 1073   | 119462 | 6.8 | Isoform Alpha                                                                                                                                                                                                                                                                                                                                                                                                                                                            |
| 345 | UPI0000366FA3    | 15                   | 32             | 17.8                  | 1086   | 121665 | 7.4 | Integrin alpha-6 precursor (VLA-6) (CD49f antigen) [Contains: Integrin alpha-6 heavy chain; Integrin alpha-6 light chain].                                                                                                                                                                                                                                                                                                                                               |
| 345 | P23229-5         | 15                   | 32             | 17.8                  | 1086   | 121678 | 7.6 | Isoform Alpha                                                                                                                                                                                                                                                                                                                                                                                                                                                            |
| 345 | UPI0000EA87E5    | 15                   | 32             | 17.7                  | 1091   | 122053 | 6.8 | integrin alpha chain, alpha 6 isoform a precursor                                                                                                                                                                                                                                                                                                                                                                                                                        |
| 345 | P23229-3         | 15                   | 32             | 17.7                  | 1091   | 122066 | 7   | Isoform Alpha                                                                                                                                                                                                                                                                                                                                                                                                                                                            |
| 345 | UPI0000D6126A    | 15                   | 32             | 17.4                  | 1112   | 124028 | 6.6 | Integrin alpha-6 precursor (VLA-6) (CD49f antigen) [Contains: Integrin alpha-6 heavy chain; Integrin alpha-6 light chain].                                                                                                                                                                                                                                                                                                                                               |

| No. | Accession Number | Unique Peptide Count | Spectrum Count | Sequence Coverage (%) | Length | MolWt  | pI   | Descriptive Name                                                                                                                                                                                |
|-----|------------------|----------------------|----------------|-----------------------|--------|--------|------|-------------------------------------------------------------------------------------------------------------------------------------------------------------------------------------------------|
| 345 | P23229-6         | 15                   | 32             | 17.4                  | 1112   | 124014 | 6.6  | Isoform Alpha                                                                                                                                                                                   |
| 345 | P23229           | 15                   | 32             | 17.1                  | 1130   | 126618 | 6.8  | Integrin alpha-6 precursor (VLA-6) (CD49f antigen) [Contains: Integrin alpha-6 heavy chain; Integrin alpha-6 light chain]                                                                       |
| 345 | UPI000013D4BA    | 15                   | 32             | 17.1                  | 1130   | 126605 | 6.6  | Integrin alpha-6 precursor (VLA-6) (CD49f antigen) [Contains: Integrin alpha-6 heavy chain; Integrin alpha-6 light chain].                                                                      |
| 346 | Q15021           | 15                   | 49             | 13.3                  | 1401   | 157168 | 6.6  | Condensin complex subunit 1                                                                                                                                                                     |
| 346 | UPI000013C8CA    | 15                   | 49             | 13.3                  | 1401   | 157182 | 6.6  | Condensin complex subunit 1 (Non-SMC condensin I complex subunit D2) (Chromosome condensation-related SMC-associated protein 1) (Chromosome-associated protein D2) (hCAP-D2) (XCAP-D2 homolog). |
| 347 | Q71UH4           | 15                   | 33             | 12.5                  | 1598   | 180613 | 7.9  | DNA topoisomerase II beta                                                                                                                                                                       |
| 347 | Q02880           | 15                   | 33             | 12.3                  | 1626   | 183266 | 8    | DNA topoisomerase 2-beta                                                                                                                                                                        |
| 347 | Q02880-2         | 15                   | 33             | 12.3                  | 1621   | 182661 | 8.1  | Isoform Beta                                                                                                                                                                                    |
| 348 | Q9C0C2           | 15                   | 33             | 10.5                  | 1729   | 181780 | 4.9  | 182 kDa tankyrase 1-binding protein                                                                                                                                                             |
| 348 | UPI000013DB72    | 15                   | 33             | 10.5                  | 1729   | 181795 | 4.9  | tankyrase 1-binding protein 1                                                                                                                                                                   |
| 349 | Q92621           | 15                   | 33             | 8.1                   | 2012   | 227918 | 6.2  | Nuclear pore complex protein Nup205                                                                                                                                                             |
| 349 | UPI00001D74D8    | 15                   | 33             | 8.1                   | 2012   | 227919 | 6.2  | Nuclear pore complex protein Nup205 (Nucleoporin Nup205) (205 kDa nucleoporin).                                                                                                                 |
| 350 | Q9UQ35           | 15                   | 57             | 7.3                   | 2752   | 299616 | 12.1 | Serine/arginine repetitive matrix protein 2                                                                                                                                                     |
| 351 | P49792           | 15                   | 47             | 5.2                   | 3224   | 358201 | 6.2  | E3 SUMO-protein ligase RanBP2                                                                                                                                                                   |
| 351 | UPI0000167B4B    | 15                   | 47             | 5.2                   | 3224   | 358173 | 6.2  | RAN binding protein 2                                                                                                                                                                           |
| 352 | P30041           | 14                   | 88             | 66.5                  | 224    | 25035  | 6.4  | Peroxiredoxin-6                                                                                                                                                                                 |
| 353 | Q15365           | 14                   | 94             | 59.3                  | 356    | 37498  | 7.1  | Poly(rC)-binding protein 1                                                                                                                                                                      |
| 353 | UPI00001313C8    | 14                   | 94             | 59.3                  | 356    | 37526  | 7.1  | poly(rC) binding protein 1                                                                                                                                                                      |
| 354 | Q13162           | 14                   | 61             | 59                    | 271    | 30540  | 6.3  | Peroxiredoxin-4                                                                                                                                                                                 |
| 355 | Q13347           | 14                   | 51             | 57.8                  | 325    | 36502  | 5.6  | Eukaryotic translation initiation factor 3 subunit 2                                                                                                                                            |
| 356 | Q5TAM6           | 14                   | 49             | 57.1                  | 333    | 37805  | 5.2  | SGT1, suppressor of G2 allele of SKP1                                                                                                                                                           |
| 357 | UPI00006C059A    | 14                   | 84             | 62.5                  | 293    | 31445  | 7.6  | PREDICTED: similar to voltage-dependent anion channel 2                                                                                                                                         |
| 357 | UPI000013EEEE0   | 14                   | 84             | 62.5                  | 293    | 31479  | 7.6  | PREDICTED: similar to voltage-dependent anion channel 2                                                                                                                                         |
| 357 | P45880-5         | 14                   | 84             | 62.2                  | 294    | 31566  | 7.6  | Isoform 5 of P45880                                                                                                                                                                             |
| 357 | UPI0000D611B0    | 14                   | 84             | 61.8                  | 296    | 31721  | 7.6  | UPI0000D611B0 UniRef100 entry                                                                                                                                                                   |
| 357 | UPI00003666E7    | 14                   | 84             | 55.3                  | 331    | 36232  | 6.7  | Voltage-dependent anion-selective channel protein 2 (VDAC-2) (hVDAC2) (Outer mitochondrial membrane protein porin 2).                                                                           |
| 357 | P45880-3         | 14                   | 84             | 55.1                  | 332    | 36288  | 6.7  | Isoform 3 of P45880                                                                                                                                                                             |
| 358 | P27695           | 14                   | 32             | 55                    | 318    | 35554  | 8.1  | DNA-(apurinic or apyrimidinic site) lyase                                                                                                                                                       |
| 359 | P04406           | 14                   | 967            | 54.3                  | 335    | 36053  | 8.5  | Glyceraldehyde-3-phosphate dehydrogenase                                                                                                                                                        |
| 360 | UPI00004115F3    | 14                   | 30             | 60.6                  | 188    | 21064  | 8.7  | PREDICTED: similar to deoxythymidylate kinase (thymidylate kinase) isoform 1                                                                                                                    |
| 360 | P23919           | 14                   | 30             | 53.8                  | 212    | 23819  | 8.3  | Thymidylate kinase                                                                                                                                                                              |
| 361 | P61247           | 14                   | 169            | 53.4                  | 264    | 29945  | 9.7  | 40S ribosomal protein S3a                                                                                                                                                                       |
| 361 | Q6NXR8           | 14                   | 169            | 53.4                  | 264    | 29975  | 9.7  | Ribosomal protein S3A                                                                                                                                                                           |
| 362 | P29692           | 14                   | 144            | 51.6                  | 281    | 31122  | 5    | Elongation factor 1-delta                                                                                                                                                                       |
| 362 | Q96I38           | 14                   | 144            | 22.4                  | 647    | 71422  | 6.4  | EEF1D protein                                                                                                                                                                                   |
| 363 | P04899           | 14                   | 60             | 50.7                  | 355    | 40451  | 5.5  | Guanine nucleotide-binding protein G(i), alpha-2 subunit                                                                                                                                        |
| 364 | Q53GN6           | 14                   | 37             | 47.9                  | 376    | 42917  | 5.7  | Proteasome 26S non-ATPase subunit 13 isoform 1 variant                                                                                                                                          |
| 364 | UPI0000158430    | 14                   | 37             | 47.9                  | 376    | 42946  | 5.8  | 26S proteasome non-ATPase regulatory subunit 13 (26S proteasome regulatory subunit S11) (26S proteasome regulatory subunit p40.5).                                                              |
| 364 | Q9UNM6           | 14                   | 37             | 47.9                  | 376    | 42918  | 5.8  | 26S proteasome non-ATPase regulatory subunit 13                                                                                                                                                 |
| 365 | O00154           | 14                   | 76             | 47.6                  | 380    | 41796  | 8.5  | Cytosolic acyl coenzyme A thioester hydrolase                                                                                                                                                   |
| 366 | P17174           | 14                   | 23             | 45.3                  | 413    | 46248  | 7    | Aspartate aminotransferase, cytoplasmic                                                                                                                                                         |
| 367 | Q02878           | 14                   | 244            | 45.1                  | 288    | 32728  | 10.6 | 60S ribosomal protein L6                                                                                                                                                                        |
| 367 | Q8TBK5           | 14                   | 244            | 45.1                  | 288    | 32742  | 10.6 | Ribosomal protein L6                                                                                                                                                                            |
| 367 | Q8N5Z7           | 14                   | 244            | 45.1                  | 288    | 32726  | 10.6 | Ribosomal protein L6                                                                                                                                                                            |
| 367 | Q9HBB3           | 14                   | 244            | 45                    | 289    | 32891  | 10.6 | DNA-binding protein TAXREB107                                                                                                                                                                   |
| 368 | O15144           | 14                   | 98             | 45                    | 300    | 34333  | 7.3  | Actin-related protein 2/3 complex subunit 2                                                                                                                                                     |
| 369 | Q32Q68           | 14                   | 57             | 44.9                  | 272    | 30629  | 6    | Capping protein (Actin filament) muscle Z-line, beta                                                                                                                                            |
| 369 | Q5VVZ5           | 14                   | 57             | 40.5                  | 301    | 33781  | 6.4  | Capping protein (Actin filament) muscle Z-line, beta                                                                                                                                            |
| 370 | P23381           | 14                   | 44             | 43.9                  | 471    | 53165  | 6.2  | Tryptophanyl-tRNA synthetase, cytoplasmic                                                                                                                                                       |
| 371 | Q15084           | 14                   | 133            | 43                    | 440    | 48121  | 5.1  | Protein disulfide-isomerase A6 precursor                                                                                                                                                        |
| 371 | Q15084-2         | 14                   | 133            | 38.4                  | 492    | 53901  | 5.3  | Isoform 2 of Q15084                                                                                                                                                                             |
| 372 | P31930           | 14                   | 34             | 41.9                  | 480    | 52646  | 6.4  | Ubiquinol-cytochrome-c reductase complex core protein 1, mitochondrial precursor                                                                                                                |
| 373 | O75874           | 14                   | 28             | 41.1                  | 414    | 46659  | 7    | Isocitrate dehydrogenase [NADP] cytoplasmic (EC 1.1.1.42) (Cytosolic NADP-isocitrate dehydrogenase) (Oxalosuccinate decarboxylase) (IDH) (NADP(+)-specific ICDH)                                |
| 373 | Q6FIA4           | 14                   | 28             | 41.1                  | 414    | 46568  | 6.8  | IDH1 protein                                                                                                                                                                                    |
| 374 | P26599           | 14                   | 85             | 39.4                  | 531    | 57221  | 9.2  | Polypyrimidine tract-binding protein 1                                                                                                                                                          |
| 374 | P26599-2         | 14                   | 85             | 38                    | 550    | 59037  | 9.2  | Isoform 2 of P26599                                                                                                                                                                             |

| No. | Accession Number | Unique Peptide Count | Spectrum Count | Sequence Coverage (%) | Length | MolWt  | pI   | Descriptive Name                                                                                                                                  |
|-----|------------------|----------------------|----------------|-----------------------|--------|--------|------|---------------------------------------------------------------------------------------------------------------------------------------------------|
| 374 | UPI0000D616E2    | 14                   | 85             | 37.5                  | 557    | 59693  | 9.2  | Polypyrimidine tract-binding protein 1 (PTB) (Heterogeneous nuclear ribonucleoprotein I) (hnRNP I) (57 kDa RNA-binding protein PPTB-1).           |
| 374 | Q9BUQ0           | 14                   | 85             | 37.5                  | 557    | 59633  | 9.2  | Polypyrimidine tract binding protein 1                                                                                                            |
| 375 | UPI000013EC8B    | 14                   | 151            | 39                    | 426    | 47566  | 11.1 | 60S ribosomal protein L4 (L1).                                                                                                                    |
| 375 | P36578           | 14                   | 151            | 38.9                  | 427    | 47697  | 11.1 | 60S ribosomal protein L4                                                                                                                          |
| 375 | Q59GY2           | 14                   | 151            | 37.6                  | 441    | 48996  | 11   | Ribosomal protein L4 variant                                                                                                                      |
| 376 | Q8TC62           | 14                   | 52             | 39.6                  | 417    | 48659  | 8.6  | Septin 7                                                                                                                                          |
| 376 | Q3LIE9           | 14                   | 52             | 39.5                  | 418    | 48774  | 8.6  | Predicted protein product of Nbla02942                                                                                                            |
| 376 | A4GY8            | 14                   | 52             | 38.1                  | 433    | 50263  | 8.6  | Hypothetical protein DKFZp686F17268                                                                                                               |
| 376 | Q16181-2         | 14                   | 52             | 37.8                  | 436    | 50581  | 8.6  | Isoform 2 of Q16181                                                                                                                               |
| 376 | Q16181           | 14                   | 52             | 37.8                  | 437    | 50680  | 8.6  | Septin-7                                                                                                                                          |
| 376 | UPI0000D61C26    | 14                   | 52             | 37.7                  | 438    | 50809  | 8.5  | Septin-7 (CDC10 protein homolog).                                                                                                                 |
| 377 | P49411           | 14                   | 46             | 38.1                  | 452    | 49542  | 7.6  | Elongation factor Tu, mitochondrial precursor                                                                                                     |
| 378 | Q9NTK5           | 14                   | 37             | 37.9                  | 396    | 44744  | 7.8  | Putative GTP-binding protein 9                                                                                                                    |
| 379 | P21589           | 14                   | 66             | 37.6                  | 574    | 63368  | 7    | 5'-nucleotidase precursor                                                                                                                         |
| 379 | Q6NZX3           | 14                   | 66             | 37.6                  | 574    | 63308  | 7    | 5'-nucleotidase, ecto                                                                                                                             |
| 379 | Q53Z63           | 14                   | 66             | 37.6                  | 574    | 63338  | 7    | 5'-nucleotidase                                                                                                                                   |
| 380 | Q9Y265           | 14                   | 41             | 37.5                  | 456    | 50228  | 6.4  | RuvB-like 1                                                                                                                                       |
| 381 | Q6NUK1           | 14                   | 22             | 36.1                  | 477    | 53338  | 6.3  | Solute carrier family 25 member 24                                                                                                                |
| 381 | UPI00001BDC72    | 14                   | 22             | 36.1                  | 476    | 53251  | 6.3  | solute carrier family 25 member 24 isoform 1                                                                                                      |
| 381 | Q6PJ9            | 14                   | 22             | 36.1                  | 477    | 53354  | 6.3  | Solute carrier family 25 (Mitochondrial carrier; phosphate carrier), member 24                                                                    |
| 382 | P00505           | 14                   | 40             | 36                    | 430    | 47476  | 9    | Aspartate aminotransferase, mitochondrial precursor                                                                                               |
| 382 | UPI000013CB99    | 14                   | 40             | 36                    | 430    | 47518  | 9    | aspartate aminotransferase 2 precursor                                                                                                            |
| 382 | Q53FL3           | 14                   | 40             | 36                    | 430    | 47548  | 9    | Aspartate aminotransferase 2 variant                                                                                                              |
| 383 | P60228           | 14                   | 90             | 36                    | 445    | 52221  | 6    | Eukaryotic translation initiation factor 3 subunit 6                                                                                              |
| 383 | Q6IAX5           | 14                   | 90             | 36                    | 445    | 52206  | 6    | EIF3S6 protein                                                                                                                                    |
| 384 | Q7Z4H8           | 14                   | 35             | 35.9                  | 507    | 58573  | 8.2  | KDEL motif-containing protein 2 precursor                                                                                                         |
| 385 | Q9NVA2           | 14                   | 47             | 35.9                  | 429    | 49398  | 6.8  | Septin-11                                                                                                                                         |
| 386 | UPI0000D61084    | 14                   | 179            | 37.6                  | 599    | 65668  | 5.5  | Dolichyl-diphosphooligosaccharide--protein glycosyltransferase 63 kDa subunit precursor (EC 2.4.1.119) (Ribophorin II) (RPN-II) (RIBIIR).         |
| 386 | Q5JYR6           | 14                   | 179            | 36.6                  | 615    | 67723  | 6.1  | Ribophorin II                                                                                                                                     |
| 386 | P04844           | 14                   | 179            | 35.7                  | 631    | 69284  | 5.7  | Dolichyl-diphosphooligosaccharide--protein glycosyltransferase 63 kDa subunit precursor                                                           |
| 387 | P41091           | 14                   | 23             | 35                    | 472    | 51110  | 8.4  | Eukaryotic translation initiation factor 2 subunit 3                                                                                              |
| 388 | P55809           | 14                   | 30             | 33.8                  | 520    | 56158  | 7.5  | Succinyl-CoA:3-ketoacid-coenzyme A transferase 1, mitochondrial precursor                                                                         |
| 389 | P38606           | 14                   | 22             | 33.1                  | 617    | 68304  | 5.5  | Vacuolar ATP synthase catalytic subunit A                                                                                                         |
| 390 | P08195           | 14                   | 266            | 32.3                  | 529    | 57945  | 5.3  | 4F2 cell-surface antigen heavy chain                                                                                                              |
| 390 | UPI0000405902    | 14                   | 266            | 28.5                  | 599    | 64873  | 5.1  | solute carrier family 3 (activators of dibasic and neutral amino acid transport), member 2 isoform d                                              |
| 390 | UPI00004EC298    | 14                   | 266            | 27.1                  | 631    | 68101  | 5    | solute carrier family 3 (activators of dibasic and neutral amino acid transport), member 2 isoform b                                              |
| 390 | UPI000013E757    | 14                   | 266            | 27.1                  | 630    | 67994  | 5    | solute carrier family 3 (activators of dibasic and neutral amino acid transport), member 2 isoform c                                              |
| 390 | UPI00004EC297    | 14                   | 266            | 25.9                  | 661    | 71123  | 5    | solute carrier family 3 (activators of dibasic and neutral amino acid transport), member 2 isoform a                                              |
| 391 | P27694           | 14                   | 27             | 29.5                  | 616    | 68138  | 7.2  | Replication protein A 70 kDa DNA-binding subunit                                                                                                  |
| 392 | P54577           | 14                   | 33             | 28                    | 528    | 59144  | 7    | Tyrosyl-tRNA synthetase, cytoplasmic                                                                                                              |
| 393 | Q2T9F7           | 14                   | 39             | 27.8                  | 713    | 79612  | 6.8  | UNC84B protein                                                                                                                                    |
| 393 | Q9UHQ9           | 14                   | 39             | 27.6                  | 717    | 80311  | 6.7  | Sad1/unc-84-like protein 2                                                                                                                        |
| 393 | Q504T5           | 14                   | 39             | 26.8                  | 738    | 82575  | 6.6  | UNC84B protein                                                                                                                                    |
| 394 | Q8N4P8           | 14                   | 25             | 27.5                  | 632    | 73709  | 9.6  | GTPBP4 protein                                                                                                                                    |
| 394 | UPI00001AE86D    | 14                   | 25             | 27.4                  | 634    | 73852  | 9.5  | Nucleolar GTP-binding protein 1 (Chronic renal failure gene protein) (GTP-binding protein NGB).                                                   |
| 394 | Q9BZE4           | 14                   | 25             | 27.4                  | 634    | 73965  | 9.5  | Nucleolar GTP-binding protein 1                                                                                                                   |
| 395 | Q12797           | 14                   | 118            | 22.6                  | 758    | 85863  | 5    | Aspartyl/asparaginyl beta-hydroxylase                                                                                                             |
| 395 | UPI0000D624CD    | 14                   | 118            | 22.5                  | 759    | 86006  | 5.1  | Aspartyl/asparaginyl beta-hydroxylase (EC 1.14.11.16) (Aspartate beta- hydroxylase) (ASP beta-hydroxylase) (Peptide-aspartate beta- dioxygenase). |
| 396 | Q96TA1           | 14                   | 40             | 21.3                  | 733    | 82683  | 6.2  | Niban-like protein                                                                                                                                |
| 396 | Q5VVV7           | 14                   | 40             | 20.9                  | 746    | 84138  | 6.2  | Chromosome 9 open reading frame 88                                                                                                                |
| 397 | Q96FS1           | 14                   | 34             | 22.7                  | 830    | 92388  | 7.2  | CTNND1 protein                                                                                                                                    |
| 397 | O60716-21        | 14                   | 34             | 22.6                  | 832    | 92675  | 7.2  | Isoform 3A of O60716                                                                                                                              |
| 397 | O60716-19        | 14                   | 34             | 22.4                  | 838    | 93496  | 7    | Isoform 3AC of O60716                                                                                                                             |
| 397 | O60716-18        | 14                   | 34             | 21.8                  | 861    | 95868  | 6.3  | Isoform 3AB of O60716                                                                                                                             |
| 397 | O60716-13        | 14                   | 34             | 21.4                  | 879    | 98049  | 7.5  | Isoform 2A of O60716                                                                                                                              |
| 397 | O60716-11        | 14                   | 34             | 21.2                  | 885    | 98870  | 7.3  | Isoform 2AC of O60716                                                                                                                             |
| 397 | O60716-10        | 14                   | 34             | 20.7                  | 908    | 101242 | 6.6  | Isoform 2AB of O60716                                                                                                                             |
| 397 | Q6DHZ7           | 14                   | 34             | 20.2                  | 933    | 104098 | 7    | CTNND1 protein                                                                                                                                    |
| 397 | O60716-5         | 14                   | 34             | 20.2                  | 933    | 104156 | 7    | Isoform 1A of O60716                                                                                                                              |
| 397 | UPI0000D62606    | 14                   | 34             | 20                    | 939    | 105005 | 7    | Catenin delta-1 (p120 catenin) (p120(ctn)) (Cadherin-associated Src substrate) (CAS) (p120(cas)).                                                 |
| 397 | O60716-3         | 14                   | 34             | 20                    | 939    | 104977 | 6.9  | Isoform 1AC of O60716                                                                                                                             |
| 397 | O60716-2         | 14                   | 34             | 19.5                  | 962    | 107349 | 6.3  | Isoform 1AB of O60716                                                                                                                             |

| No. | Accession Number | Unique Peptide Count | Spectrum Count | Sequence Coverage (%) | Length | MolWt  | pI  | Descriptive Name                                                                                                                                                                                                                                                |
|-----|------------------|----------------------|----------------|-----------------------|--------|--------|-----|-----------------------------------------------------------------------------------------------------------------------------------------------------------------------------------------------------------------------------------------------------------------|
| 397 | O60716           | 14                   | 34             | 19.4                  | 968    | 108170 | 6.2 | Catenin delta-1 (p120 catenin) (p120(ctn)) (Cadherin-associated Src substrate) (CAS) (p120(cas))                                                                                                                                                                |
| 398 | Q9P2B2           | 14                   | 29             | 18                    | 879    | 98556  | 6.6 | Prostaglandin F2 receptor negative regulator precursor                                                                                                                                                                                                          |
| 399 | Q5SYX5           | 14                   | 20             | 18.3                  | 952    | 107946 | 5   | Golgi autoantigen, golgin subfamily a, 2                                                                                                                                                                                                                        |
| 399 | Q08379           | 14                   | 20             | 17.6                  | 990    | 111659 | 5   | Golgin subfamily A member 2                                                                                                                                                                                                                                     |
| 400 | O14617-4         | 14                   | 48             | 16.8                  | 1021   | 114707 | 8   | Isoform 4 of O14617                                                                                                                                                                                                                                             |
| 400 | O14617           | 14                   | 48             | 14.9                  | 1153   | 130158 | 8.5 | AP-3 complex subunit delta-1                                                                                                                                                                                                                                    |
| 400 | O14617-5         | 14                   | 48             | 14.2                  | 1215   | 136651 | 7.6 | Isoform 5 of O14617                                                                                                                                                                                                                                             |
| 401 | O43795-2         | 14                   | 29             | 15.6                  | 1078   | 124951 | 9.2 | Isoform 2 of O43795                                                                                                                                                                                                                                             |
| 401 | O43795           | 14                   | 29             | 14.8                  | 1136   | 131985 | 9.4 | Myosin-Ib                                                                                                                                                                                                                                                       |
| 402 | Q15155           | 14                   | 38             | 14.6                  | 1222   | 134352 | 5.8 | Nodal modulator 1 precursor                                                                                                                                                                                                                                     |
| 402 | UPI00001AF3F1    | 14                   | 38             | 14.6                  | 1222   | 134133 | 5.7 | nodal modulator 3                                                                                                                                                                                                                                               |
| 402 | UPI000013D37E    | 14                   | 38             | 14.6                  | 1222   | 134324 | 5.8 | nodal modulator 1                                                                                                                                                                                                                                               |
| 402 | UPI00001AE864    | 14                   | 38             | 14                    | 1267   | 139381 | 5.7 | Nodal modulator 3 precursor (pM5 protein 3).                                                                                                                                                                                                                    |
| 402 | Q5JPE7           | 14                   | 38             | 14                    | 1267   | 139439 | 5.8 | Nodal modulator 2 precursor                                                                                                                                                                                                                                     |
| 403 | UPI00001610D5    | 14                   | 29             | 14.3                  | 1155   | 129438 | 8.5 | DEAH (Asp-Glu-Ala-His) box polypeptide 30 isoform 2                                                                                                                                                                                                             |
| 403 | Q7L2E3           | 14                   | 29             | 13.8                  | 1194   | 133938 | 8.8 | Putative ATP-dependent RNA helicase DHX30                                                                                                                                                                                                                       |
| 404 | O60271-4         | 14                   | 30             | 13.5                  | 1307   | 144681 | 5.2 | Isoform 4 of O60271                                                                                                                                                                                                                                             |
| 404 | O60271-2         | 14                   | 30             | 13.4                  | 1311   | 145135 | 5.2 | Isoform 2 of O60271                                                                                                                                                                                                                                             |
| 404 | UPI0000D62364    | 14                   | 30             | 13.4                  | 1309   | 144909 | 5.2 | C-jun-amino-terminal kinase-interacting protein 4 (JNK-interacting protein 4) (JIP-4) (JNK-associated leucine-zipper protein) (JLP) (Sperm-associated antigen 9) (Mitogen-activated protein kinase 8-interacting protein 4) (Human lung cancer protein 6) (HLC) |
| 404 | UPI0000D62363    | 14                   | 30             | 13.4                  | 1313   | 145362 | 5.2 | C-jun-amino-terminal kinase-interacting protein 4 (JNK-interacting protein 4) (JIP-4) (JNK-associated leucine-zipper protein) (JLP) (Sperm-associated antigen 9) (Mitogen-activated protein kinase 8-interacting protein 4) (Human lung cancer protein 6) (HLC) |
| 405 | O95819           | 14                   | 35             | 13.1                  | 1239   | 142101 | 7.5 | Mitogen-activated protein kinase kinase kinase 4                                                                                                                                                                                                                |
| 406 | P28290           | 14                   | 24             | 13.1                  | 1259   | 138386 | 5.2 | Sperm-specific antigen 2                                                                                                                                                                                                                                        |
| 407 | Q14160           | 14                   | 27             | 9.8                   | 1630   | 174930 | 5.1 | Protein LAP4                                                                                                                                                                                                                                                    |
| 407 | UPI00001408BD    | 14                   | 27             | 9.8                   | 1630   | 174884 | 5.1 | Protein LAP4 (Protein scribble homolog) (hScrib).                                                                                                                                                                                                               |
| 407 | UPI0000D62517    | 14                   | 27             | 9.7                   | 1654   | 177194 | 5.1 | Protein LAP4 (Protein scribble homolog) (hScrib).                                                                                                                                                                                                               |
| 407 | UPI00004576FD    | 14                   | 27             | 9.7                   | 1655   | 177693 | 5.1 | Protein LAP4 (Protein scribble homolog) (hScrib).                                                                                                                                                                                                               |
| 407 | Q14160-4         | 14                   | 27             | 9.7                   | 1654   | 177240 | 5.1 | Isoform 4 of Q14160                                                                                                                                                                                                                                             |
| 407 | Q14160-3         | 14                   | 27             | 9.7                   | 1655   | 177739 | 5.1 | Isoform 3 of Q14160                                                                                                                                                                                                                                             |
| 408 | Q59ES2           | 14                   | 31             | 6.5                   | 2341   | 267021 | 6.3 | Inositol 1,4,5-trisphosphate receptor type 3 variant                                                                                                                                                                                                            |
| 408 | UPI0000161B31    | 14                   | 31             | 5.7                   | 2671   | 304115 | 6.5 | inositol 1,4,5-trisphosphate receptor, type 3                                                                                                                                                                                                                   |
| 408 | Q5TAQ2           | 14                   | 31             | 5.7                   | 2671   | 304105 | 6.5 | Inositol 1,4,5-trisphosphate receptor, type 3                                                                                                                                                                                                                   |
| 409 | Q14789           | 14                   | 24             | 5.2                   | 3259   | 376019 | 5   | Golgin subfamily B member 1                                                                                                                                                                                                                                     |
| 409 | UPI000012B42C    | 14                   | 24             | 5.2                   | 3259   | 376078 | 5   | golgi autoantigen, golgin subfamily b, macrogolgin (with transmembrane signal), 1                                                                                                                                                                               |
| 410 | Q5T4S7           | 14                   | 37             | 2.9                   | 5183   | 573849 | 6   | Zinc finger UBR1-type protein 1                                                                                                                                                                                                                                 |
| 410 | Q8TDN5           | 14                   | 37             | 2.9                   | 5183   | 573909 | 6   | P600                                                                                                                                                                                                                                                            |
| 411 | Q14019           | 13                   | 80             | 81.7                  | 142    | 15945  | 5.7 | Coactosin-like protein                                                                                                                                                                                                                                          |
| 412 | P07737           | 13                   | 170            | 73.6                  | 140    | 15054  | 8.3 | Profilin-1                                                                                                                                                                                                                                                      |
| 413 | Q99714           | 13                   | 46             | 70.5                  | 261    | 26923  | 7.8 | 3-hydroxyacyl-CoA dehydrogenase type-2                                                                                                                                                                                                                          |
| 414 | P37802           | 13                   | 153            | 70.4                  | 199    | 22391  | 8.2 | Transgelin-2                                                                                                                                                                                                                                                    |
| 414 | UPI000013D3E3    | 13                   | 153            | 63.6                  | 220    | 24454  | 8.2 | Transgelin-2 (SM22-alpha homolog).                                                                                                                                                                                                                              |
| 415 | O00299           | 13                   | 88             | 68.5                  | 241    | 26923  | 5.2 | Chloride intracellular channel protein 1                                                                                                                                                                                                                        |
| 415 | Q53FB0           | 13                   | 88             | 68.5                  | 241    | 27015  | 5.2 | Chloride intracellular channel 1 variant                                                                                                                                                                                                                        |
| 416 | P61019           | 13                   | 106            | 67.9                  | 212    | 23546  | 6.5 | Ras-related protein Rab-2A                                                                                                                                                                                                                                      |
| 417 | Q99497           | 13                   | 41             | 67.2                  | 189    | 19891  | 6.8 | Protein DJ-1                                                                                                                                                                                                                                                    |
| 418 | Q9Y696           | 13                   | 41             | 64.8                  | 253    | 28772  | 5.6 | Chloride intracellular channel protein 4                                                                                                                                                                                                                        |
| 419 | Q13509           | 13                   | 76             | 64.4                  | 450    | 50433  | 4.9 | Tubulin beta-3 chain                                                                                                                                                                                                                                            |
| 420 | Q5RLJ0           | 13                   | 36             | 61.1                  | 244    | 27969  | 6.4 | CLE                                                                                                                                                                                                                                                             |
| 420 | Q9Y224           | 13                   | 36             | 61.1                  | 244    | 28068  | 6.7 | Protein C14orf166                                                                                                                                                                                                                                               |
| 421 | P67775           | 13                   | 26             | 60.8                  | 309    | 35594  | 5.5 | Serine/threonine-protein phosphatase 2A catalytic subunit alpha isoform                                                                                                                                                                                         |
| 422 | P54920           | 13                   | 30             | 60                    | 295    | 33233  | 5.4 | Alpha-soluble NSF attachment protein                                                                                                                                                                                                                            |
| 423 | P31150           | 13                   | 29             | 59.3                  | 447    | 50583  | 5.1 | Rab GDP dissociation inhibitor alpha                                                                                                                                                                                                                            |
| 424 | Q9UJZ1           | 13                   | 46             | 56.7                  | 356    | 38534  | 7.4 | Stomatin-like protein 2                                                                                                                                                                                                                                         |
| 425 | Q15019           | 13                   | 93             | 54.3                  | 361    | 41487  | 6.6 | Septin-2                                                                                                                                                                                                                                                        |
| 426 | P13804           | 13                   | 40             | 53.5                  | 333    | 35080  | 8.4 | Electron transfer flavoprotein subunit alpha, mitochondrial precursor                                                                                                                                                                                           |
| 427 | Q9BUP3           | 13                   | 30             | 53.3                  | 242    | 27118  | 8.6 | Oxidoreductase HTATIP2                                                                                                                                                                                                                                          |
| 428 | P55145           | 13                   | 31             | 51.4                  | 179    | 20257  | 8.4 | ARMET protein precursor                                                                                                                                                                                                                                         |
| 428 | UPI00004542F2    | 13                   | 31             | 49.7                  | 185    | 21144  | 8.9 | arginine-rich, mutated in early stage tumors                                                                                                                                                                                                                    |
| 429 | Q15631           | 13                   | 57             | 51.3                  | 228    | 26183  | 6.4 | Translin                                                                                                                                                                                                                                                        |
| 430 | Q06323           | 13                   | 38             | 47.8                  | 249    | 28723  | 6   | Proteasome activator complex subunit 1                                                                                                                                                                                                                          |

| No. | Accession Number | Unique Peptide Count | Spectrum Count | Sequence Coverage (%) | Length | MolWt  | pI   | Descriptive Name                                                                                                                                                                                                                                                    |
|-----|------------------|----------------------|----------------|-----------------------|--------|--------|------|---------------------------------------------------------------------------------------------------------------------------------------------------------------------------------------------------------------------------------------------------------------------|
| 430 | UPI000045675C    | 13                   | 38             | 47.2                  | 252    | 28837  | 5.4  | Proteasome activator complex subunit 1 (Proteasome activator 28-alpha subunit) (PA28alpha) (PA28a) (Activator of multicatalytic protease subunit 1) (11S regulator complex subunit alpha) (REG-alpha) (Interferon gamma up-regulated I-5111 protein) (IGUP I-51)    |
| 431 | Q5T7C4           | 13                   | 80             | 64.6                  | 158    | 18311  | 9.7  | High-mobility group box 1                                                                                                                                                                                                                                           |
| 431 | Q5T7C6           | 13                   | 80             | 63                    | 162    | 18808  | 9.7  | High-mobility group box 1                                                                                                                                                                                                                                           |
| 431 | Q59GW1           | 13                   | 80             | 58                    | 176    | 20164  | 9.7  | High-mobility group box 1 variant                                                                                                                                                                                                                                   |
| 431 | P09429           | 13                   | 80             | 47.4                  | 215    | 24894  | 5.7  | High mobility group protein B1                                                                                                                                                                                                                                      |
| 431 | Q14321           | 13                   | 80             | 47.4                  | 215    | 24993  | 5.9  | HMG-1                                                                                                                                                                                                                                                               |
| 432 | P46781           | 13                   | 126            | 46.4                  | 194    | 22591  | 10.7 | 40S ribosomal protein S9                                                                                                                                                                                                                                            |
| 433 | P07339           | 13                   | 114            | 45.1                  | 412    | 44552  | 6.5  | Cathepsin D precursor (EC 3.4.23.5) [Contains: Cathepsin D light chain; Cathepsin D heavy chain]                                                                                                                                                                    |
| 434 | P24752           | 13                   | 32             | 44.7                  | 427    | 45200  | 8.8  | Acetyl-CoA acetyltransferase, mitochondrial precursor                                                                                                                                                                                                               |
| 435 | P52788           | 13                   | 35             | 44.3                  | 366    | 41268  | 5    | Spermine synthase                                                                                                                                                                                                                                                   |
| 436 | Q6IBS1           | 13                   | 35             | 42.3                  | 404    | 45250  | 5.5  | PSMC3 protein                                                                                                                                                                                                                                                       |
| 437 | P28482           | 13                   | 43             | 42.2                  | 360    | 41390  | 7    | Mitogen-activated protein kinase 1                                                                                                                                                                                                                                  |
| 437 | UPI0000F0A51A    | 13                   | 43             | 40                    | 380    | 43553  | 7.3  | Mitogen-activated protein kinase 1                                                                                                                                                                                                                                  |
| 438 | P31943           | 13                   | 168            | 41.9                  | 449    | 49229  | 6.3  | Heterogeneous nuclear ribonucleoprotein H                                                                                                                                                                                                                           |
| 438 | Q6IBM4           | 13                   | 168            | 41.9                  | 449    | 49130  | 6.2  | HNRPH1 protein                                                                                                                                                                                                                                                      |
| 438 | UPI00001AF4DD    | 13                   | 168            | 39.8                  | 472    | 51230  | 6.8  | Heterogeneous nuclear ribonucleoprotein H (hnRNP H).                                                                                                                                                                                                                |
| 439 | O75955           | 13                   | 19             | 41                    | 427    | 47355  | 7.5  | Flotillin-1                                                                                                                                                                                                                                                         |
| 439 | Q53HQ0           | 13                   | 19             | 41                    | 427    | 47354  | 8.1  | Flotillin 1 variant                                                                                                                                                                                                                                                 |
| 440 | P50213           | 13                   | 40             | 40.7                  | 366    | 39592  | 6.9  | Isocitrate dehydrogenase [NAD] subunit alpha, mitochondrial precursor (EC 1.1.1.41) (Isocitric dehydrogenase) (NAD(+)-specific ICDH)                                                                                                                                |
| 440 | Q53GF8           | 13                   | 40             | 40.7                  | 366    | 39620  | 6.9  | Isocitrate dehydrogenase 3 (NAD+) alpha variant                                                                                                                                                                                                                     |
| 441 | P07910-2         | 13                   | 123            | 40.3                  | 293    | 32338  | 5.1  | Isoform C1 of P07910                                                                                                                                                                                                                                                |
| 442 | Q5VU20           | 13                   | 58             | 40.2                  | 393    | 43135  | 8.4  | PAI-1 mRNA-binding protein                                                                                                                                                                                                                                          |
| 442 | Q8NC51           | 13                   | 58             | 38.7                  | 408    | 44965  | 8.6  | Plasminogen activator inhibitor 1 RNA-binding protein                                                                                                                                                                                                               |
| 443 | Q96ND2           | 13                   | 64             | 39.8                  | 377    | 43084  | 4.9  | CDNA FLJ31051 fis, clone HSYRA2000605, weakly similar to MYOSIN HEAVY CHAIN, CLONE 203                                                                                                                                                                              |
| 444 | P36507           | 13                   | 17             | 39.5                  | 400    | 44424  | 6.5  | Dual specificity mitogen-activated protein kinase kinase 2                                                                                                                                                                                                          |
| 445 | P21281           | 13                   | 28             | 38.7                  | 511    | 56501  | 5.8  | Vacuolar ATP synthase subunit B, brain isoform                                                                                                                                                                                                                      |
| 446 | P43686           | 13                   | 31             | 38.5                  | 418    | 47366  | 5.2  | 26S protease regulatory subunit 6B                                                                                                                                                                                                                                  |
| 447 | Q12765           | 13                   | 34             | 38.4                  | 414    | 46382  | 4.8  | Secernin-1                                                                                                                                                                                                                                                          |
| 448 | P22695           | 13                   | 34             | 37.5                  | 453    | 48443  | 8.6  | Ubiquinol-cytochrome-c reductase complex core protein 2, mitochondrial precursor                                                                                                                                                                                    |
| 449 | P38159           | 13                   | 71             | 35.5                  | 391    | 42332  | 10.1 | Heterogeneous nuclear ribonucleoprotein G                                                                                                                                                                                                                           |
| 450 | P04040           | 13                   | 28             | 34                    | 527    | 59756  | 7.4  | Catalase                                                                                                                                                                                                                                                            |
| 451 | Q16222-3         | 13                   | 31             | 31.7                  | 521    | 58682  | 6.3  | Isoform 3 of Q16222                                                                                                                                                                                                                                                 |
| 451 | Q16222           | 13                   | 31             | 31.6                  | 522    | 58769  | 6.3  | UDP-N-acetylhexosamine pyrophosphorylase (Antigen X) (AGX) (Sperm- associated antigen 2) [Includes: UDP-N-acetylgalactosamine pyrophosphorylase (EC 2.7.7.-) (AGX-1); UDP-N-acetylglucosamine pyrophosphorylase (EC 2.7.7.23) (AGX-2)]                              |
| 452 | O94973           | 13                   | 38             | 30                    | 939    | 103960 | 7    | AP-2 complex subunit alpha-2                                                                                                                                                                                                                                        |
| 452 | Q53ET1           | 13                   | 38             | 30                    | 940    | 104089 | 6.9  | Adaptor-related protein complex 2, alpha 2 subunit variant                                                                                                                                                                                                          |
| 453 | Q6IAP9           | 13                   | 14             | 29                    | 521    | 58307  | 7.4  | PRPF4 protein                                                                                                                                                                                                                                                       |
| 453 | Q5T1M7           | 13                   | 14             | 29                    | 521    | 58321  | 7.4  | PRP4 pre-mRNA processing factor 4 homolog                                                                                                                                                                                                                           |
| 453 | O43172           | 13                   | 14             | 28.9                  | 522    | 58449  | 7.4  | U4/U6 small nuclear ribonucleoprotein Prp4                                                                                                                                                                                                                          |
| 453 | Q59EL4           | 13                   | 14             | 28.1                  | 537    | 60022  | 7.6  | PRPF4 protein variant                                                                                                                                                                                                                                               |
| 454 | P12268           | 13                   | 28             | 28.8                  | 514    | 55805  | 6.9  | Inosine-5'-monophosphate dehydrogenase 2                                                                                                                                                                                                                            |
| 455 | P61221           | 13                   | 31             | 27.9                  | 599    | 67314  | 8.3  | ATP-binding cassette sub-family E member 1                                                                                                                                                                                                                          |
| 456 | Q8WXF1           | 13                   | 22             | 27.9                  | 523    | 58744  | 6.7  | Paraspeckle component 1                                                                                                                                                                                                                                             |
| 457 | Q96N86           | 13                   | 47             | 27.9                  | 517    | 59574  | 8.6  | CDNA FLJ31237 fis, clone KIDNE2004846, highly similar to 26S PROTEASOME REGULATORY SUBUNIT S3                                                                                                                                                                       |
| 457 | O43242           | 13                   | 47             | 27                    | 534    | 60978  | 8.4  | 26S proteasome non-ATPase regulatory subunit 3                                                                                                                                                                                                                      |
| 457 | Q6IBN0           | 13                   | 47             | 27                    | 534    | 60946  | 8.4  | PSMD3 protein                                                                                                                                                                                                                                                       |
| 458 | P28331           | 13                   | 25             | 26.4                  | 727    | 79468  | 6.2  | NADH-ubiquinone oxidoreductase 75 kDa subunit, mitochondrial precursor                                                                                                                                                                                              |
| 459 | P46060           | 13                   | 31             | 25.7                  | 587    | 63542  | 4.7  | Ran GTPase-activating protein 1                                                                                                                                                                                                                                     |
| 460 | O76094           | 13                   | 29             | 25.5                  | 671    | 74606  | 9.3  | Signal recognition particle 72 kDa protein                                                                                                                                                                                                                          |
| 461 | O60216           | 13                   | 15             | 25                    | 631    | 71690  | 4.7  | Double-strand-break repair protein rad21 homolog                                                                                                                                                                                                                    |
| 462 | Q9UHB9           | 13                   | 26             | 24.9                  | 627    | 70730  | 8.6  | Signal recognition particle 68 kDa protein                                                                                                                                                                                                                          |
| 463 | P07686           | 13                   | 67             | 23.7                  | 556    | 63111  | 6.8  | Beta-hexosaminidase beta chain precursor (EC 3.2.1.52) (N-acetyl-beta- glucosaminidase) (Beta-N-acetylhexosaminidase) (Hexosaminidase B) (Cervical cancer proto-oncogene 7) (HCC-7) [Contains: Beta- hexosaminidase beta-B chain; Beta-hexosaminidase beta-A chain] |

| No. | Accession Number | Unique Peptide Count | Spectrum Count | Sequence Coverage (%) | Length | MolWt  | pI   | Descriptive Name                                                                                                                                                                                   |
|-----|------------------|----------------------|----------------|-----------------------|--------|--------|------|----------------------------------------------------------------------------------------------------------------------------------------------------------------------------------------------------|
| 464 | Q8TAE4           | 13                   | 31             | 24.8                  | 634    | 72226  | 6.6  | PDE1C protein                                                                                                                                                                                      |
| 464 | Q14123-2         | 13                   | 31             | 24.8                  | 634    | 72208  | 6.6  | Isoform PDE1C1 of Q14123                                                                                                                                                                           |
| 464 | Q14123           | 13                   | 31             | 22.1                  | 709    | 80760  | 8.8  | Calcium/calmodulin-dependent 3',5'-cyclic nucleotide phosphodiesterase 1C                                                                                                                          |
| 465 | Q9H845           | 13                   | 32             | 21.7                  | 621    | 68760  | 8    | Acyl-CoA dehydrogenase family member 9, mitochondrial precursor                                                                                                                                    |
| 466 | O00469           | 13                   | 35             | 21.6                  | 737    | 84686  | 6.7  | Procollagen-lysine,2-oxoglutarate 5-dioxygenase 2 precursor                                                                                                                                        |
| 466 | O00469-2         | 13                   | 35             | 21                    | 758    | 87098  | 6.7  | Isoform 2 of O00469                                                                                                                                                                                |
| 467 | Q8TCS8           | 13                   | 20             | 20.9                  | 783    | 85951  | 7.8  | Polyribonucleotide nucleotidyltransferase 1, mitochondrial precursor                                                                                                                               |
| 467 | UPI0000D611A9    | 13                   | 20             | 20.9                  | 785    | 86123  | 7.8  | Polyribonucleotide nucleotidyltransferase 1, mitochondrial precursor (EC 2.7.7.8) (PNPase 1) (Polynucleotide phosphorylase-like protein) (PNPase old-35) (3'-5' RNA exonuclease OLD35).            |
| 467 | UPI000007136D    | 13                   | 20             | 20.9                  | 783    | 85937  | 7.8  | polyribonucleotide nucleotidyltransferase 1                                                                                                                                                        |
| 468 | Q13616           | 13                   | 24             | 20.7                  | 776    | 89678  | 8    | Cullin-1                                                                                                                                                                                           |
| 469 | Q99459           | 13                   | 25             | 20.4                  | 802    | 92251  | 8.2  | Cell division cycle 5-like protein                                                                                                                                                                 |
| 470 | Q53FR4           | 13                   | 39             | 18.7                  | 796    | 91681  | 5.5  | Vacuolar protein sorting 35 variant                                                                                                                                                                |
| 470 | Q96QK1           | 13                   | 39             | 18.7                  | 796    | 91707  | 5.5  | Vacuolar protein sorting-associated protein 35                                                                                                                                                     |
| 471 | Q86XP3           | 13                   | 21             | 18.6                  | 938    | 102975 | 7    | ATP-dependent RNA helicase DDX42                                                                                                                                                                   |
| 471 | UPI0000456AEB    | 13                   | 21             | 18.6                  | 938    | 103005 | 6.9  | DEAD box polypeptide 42 protein                                                                                                                                                                    |
| 472 | P49736           | 13                   | 28             | 18.1                  | 904    | 101896 | 5.5  | DNA replication licensing factor MCM2                                                                                                                                                              |
| 473 | Q14566           | 13                   | 25             | 18                    | 821    | 92889  | 5.4  | DNA replication licensing factor MCM6                                                                                                                                                              |
| 474 | Q15424           | 13                   | 35             | 16                    | 915    | 102642 | 5.5  | Scaffold attachment factor B                                                                                                                                                                       |
| 474 | A0AV56           | 13                   | 35             | 15.9                  | 917    | 102855 | 5.5  | Scaffold attachment factor B                                                                                                                                                                       |
| 475 | Q8TEX9           | 13                   | 31             | 15.9                  | 1081   | 118715 | 5    | Importin-4                                                                                                                                                                                         |
| 475 | Q8TEX9-2         | 13                   | 31             | 15.9                  | 1083   | 118901 | 4.9  | Isoform 2 of Q8TEX9                                                                                                                                                                                |
| 476 | Q13423           | 13                   | 50             | 15                    | 1086   | 113895 | 8.1  | NAD(P) transhydrogenase, mitochondrial precursor                                                                                                                                                   |
| 476 | Q2TB59           | 13                   | 50             | 15                    | 1086   | 113883 | 8.1  | Nicotinamide nucleotide transhydrogenase                                                                                                                                                           |
| 477 | Q96F88           | 13                   | 40             | 14.2                  | 1024   | 114681 | 9.2  | Processing of 1, ribonuclease P/MRP subunit                                                                                                                                                        |
| 477 | Q99575           | 13                   | 40             | 14.2                  | 1024   | 114709 | 9.2  | Ribonucleases P/MRP protein subunit POP1                                                                                                                                                           |
| 478 | Q6PKG0           | 13                   | 32             | 12.8                  | 1096   | 123510 | 8.8  | La-related protein 1                                                                                                                                                                               |
| 479 | Q9Y2A7           | 13                   | 24             | 12.3                  | 1128   | 128790 | 6.6  | Nck-associated protein 1                                                                                                                                                                           |
| 479 | UPI00001693F2    | 13                   | 24             | 12.3                  | 1134   | 129517 | 6.7  | NCK-associated protein 1 isoform 2                                                                                                                                                                 |
| 480 | Q9UBG0           | 13                   | 37             | 11.3                  | 1479   | 166655 | 5.8  | Macrophage mannose receptor 2 precursor                                                                                                                                                            |
| 480 | UPI000013E895    | 13                   | 37             | 11.3                  | 1479   | 166674 | 5.8  | mannose receptor, C type 2                                                                                                                                                                         |
| 481 | Q08378-2         | 13                   | 22             | 11.2                  | 1390   | 155682 | 5.4  | Isoform 2 of Q08378                                                                                                                                                                                |
| 481 | Q08378-3         | 13                   | 22             | 10.6                  | 1458   | 162985 | 5.4  | Isoform 3 of Q08378                                                                                                                                                                                |
| 481 | Q08378           | 13                   | 22             | 10.3                  | 1498   | 167354 | 5.4  | Golgin subfamily A member 3                                                                                                                                                                        |
| 482 | Q9UIG0-2         | 13                   | 30             | 9.7                   | 1479   | 170446 | 8.5  | Isoform 2 of Q9UIG0                                                                                                                                                                                |
| 482 | Q9UIG0           | 13                   | 30             | 9.6                   | 1483   | 170902 | 8.5  | Bromodomain adjacent to zinc finger domain protein 1B                                                                                                                                              |
| 483 | UPI000066D92A    | 13                   | 25             | 8.6                   | 1922   | 208475 | 4.7  | Tumor suppressor p53-binding protein 1 (p53-binding protein 1) (p53BP1) (53BP1).                                                                                                                   |
| 483 | Q12888           | 13                   | 25             | 8.4                   | 1972   | 213573 | 4.7  | Tumor suppressor p53-binding protein 1                                                                                                                                                             |
| 484 | P62937           | 12                   | 192            | 77.6                  | 165    | 18012  | 7.8  | Peptidyl-prolyl cis-trans isomerase A                                                                                                                                                              |
| 485 | P60981           | 12                   | 50             | 65.5                  | 165    | 18506  | 7.9  | Dextrin                                                                                                                                                                                            |
| 486 | Q9Y2Q3           | 12                   | 27             | 60.6                  | 226    | 25497  | 8.4  | Glutathione S-transferase kappa 1                                                                                                                                                                  |
| 487 | Q7Z4Y4           | 12                   | 32             | 56.8                  | 227    | 25620  | 9.3  | GTP:AMP phosphotransferase                                                                                                                                                                         |
| 487 | Q9UIJ7           | 12                   | 32             | 56.8                  | 227    | 25565  | 9.2  | GTP:AMP phosphotransferase mitochondrial                                                                                                                                                           |
| 488 | P05388           | 12                   | 107            | 55.8                  | 317    | 34274  | 6    | 60S acidic ribosomal protein P0                                                                                                                                                                    |
| 488 | Q53HW2           | 12                   | 107            | 55.8                  | 317    | 34302  | 6    | Ribosomal protein P0 variant                                                                                                                                                                       |
| 489 | P23284           | 12                   | 164            | 55.3                  | 208    | 22742  | 9.3  | Peptidyl-prolyl cis-trans isomerase B precursor                                                                                                                                                    |
| 489 | UPI0000072333    | 12                   | 164            | 53.2                  | 216    | 23743  | 9.4  | peptidylprolyl isomerase B precursor                                                                                                                                                               |
| 489 | Q6IBH5           | 12                   | 164            | 53.2                  | 216    | 23728  | 9.4  | Peptidyl-prolyl cis-trans isomerase                                                                                                                                                                |
| 490 | Q9Y5M8           | 12                   | 50             | 53.9                  | 271    | 29702  | 9    | Signal recognition particle receptor subunit beta                                                                                                                                                  |
| 491 | O14579           | 12                   | 29             | 52.3                  | 308    | 34482  | 5.1  | Coatomeer subunit epsilon                                                                                                                                                                          |
| 491 | Q53HJ6           | 12                   | 29             | 52.3                  | 308    | 34528  | 5.1  | Epsilon subunit of coatomeer protein complex isoform a variant                                                                                                                                     |
| 492 | P06493           | 12                   | 47             | 52.2                  | 297    | 34095  | 8.4  | Cell division control protein 2 homolog                                                                                                                                                            |
| 492 | UPI000013EBE9    | 12                   | 47             | 52.2                  | 297    | 34081  | 8.4  | Cell division control protein 2 homolog (EC 2.7.11.22) (EC 2.7.11.23) (p34 protein kinase) (Cyclin-dependent kinase 1) (CDK1).                                                                     |
| 493 | UPI000013D771    | 12                   | 25             | 51.8                  | 357    | 38325  | 8    | Sorbitol dehydrogenase (EC 1.1.1.14) (L-Iditol 2-dehydrogenase).                                                                                                                                   |
| 494 | A2VBX9           | 12                   | 59             | 50.5                  | 273    | 31655  | 6    | MHC class I antigen                                                                                                                                                                                |
| 495 | P67936           | 12                   | 80             | 49.6                  | 248    | 28522  | 4.7  | Tropomyosin alpha-4 chain                                                                                                                                                                          |
| 496 | P00387           | 12                   | 65             | 49.5                  | 301    | 34235  | 7.6  | NADH-cytochrome b5 reductase (EC 1.6.2.2) (B5R) (Diaphorase-1) (Cytochrome b5 reductase 3) [Contains: NADH-cytochrome b5 reductase membrane-bound form; NADH-cytochrome b5 reductase soluble form] |
| 497 | P08865           | 12                   | 123            | 49.2                  | 295    | 32854  | 4.9  | 40S ribosomal protein SA                                                                                                                                                                           |
| 498 | Q07955           | 12                   | 71             | 49.2                  | 248    | 27745  | 10.4 | Splicing factor, arginine/serine-rich 1                                                                                                                                                            |
| 499 | P15880           | 12                   | 79             | 47.8                  | 293    | 31324  | 10.2 | 40S ribosomal protein S2                                                                                                                                                                           |
| 499 | UPI000013EEA4    | 12                   | 79             | 47.8                  | 293    | 31438  | 10.2 | similar to ribosomal protein S2 (LOC646294), mRNA                                                                                                                                                  |
| 500 | O43809           | 12                   | 30             | 46.7                  | 227    | 26227  | 8.8  | Cleavage and polyadenylation specificity factor 5                                                                                                                                                  |

| No. | Accession Number | Unique Peptide Count | Spectrum Count | Sequence Coverage (%) | Length | MolWt | pI   | Descriptive Name                                                                                                                                                                                                      |
|-----|------------------|----------------------|----------------|-----------------------|--------|-------|------|-----------------------------------------------------------------------------------------------------------------------------------------------------------------------------------------------------------------------|
| 501 | Q6IBS0           | 12                   | 43             | 45.8                  | 349    | 39548 | 6.9  | Twinfilin-2                                                                                                                                                                                                           |
| 502 | Q12907           | 12                   | 38             | 44.9                  | 356    | 40229 | 7    | Vesicular integral-membrane protein VIP36 precursor                                                                                                                                                                   |
| 503 | Q99733           | 12                   | 55             | 43.7                  | 375    | 42823 | 4.7  | Nucleosome assembly protein 1-like 4                                                                                                                                                                                  |
| 504 | P05141           | 12                   | 189            | 42.3                  | 298    | 32895 | 9.7  | ADP/ATP translocase 2                                                                                                                                                                                                 |
| 504 | Q6NVC0           | 12                   | 189            | 39                    | 323    | 35294 | 9.8  | SLC25A5 protein                                                                                                                                                                                                       |
| 505 | Q13501           | 12                   | 32             | 42.3                  | 440    | 47687 | 5.2  | Sequestosome-1                                                                                                                                                                                                        |
| 506 | P40925           | 12                   | 63             | 40.7                  | 334    | 36426 | 7.3  | Malate dehydrogenase, cytoplasmic                                                                                                                                                                                     |
| 507 | P07954-2         | 12                   | 37             | 43.7                  | 467    | 50213 | 7.4  | Isoform Cytoplasmic of P07954                                                                                                                                                                                         |
| 507 | P07954           | 12                   | 37             | 40                    | 510    | 54637 | 8.8  | Fumarate hydratase, mitochondrial precursor                                                                                                                                                                           |
| 508 | P61160           | 12                   | 85             | 39.6                  | 394    | 44761 | 6.7  | Actin-like protein 2                                                                                                                                                                                                  |
| 509 | P04181           | 12                   | 25             | 37.8                  | 439    | 48535 | 7    | Ornithine aminotransferase, mitochondrial precursor (EC 2.6.1.13) (Ornithine--oxo-acid aminotransferase) [Contains: Ornithine aminotransferase, hepatic form; Ornithine aminotransferase, renal form]                 |
| 510 | P51991           | 12                   | 91             | 36.8                  | 378    | 39595 | 9    | Heterogeneous nuclear ribonucleoprotein A3                                                                                                                                                                            |
| 511 | Q0IJ47           | 12                   | 130            | 36.4                  | 467    | 48086 | 4.9  | KRT9 protein                                                                                                                                                                                                          |
| 512 | P39656           | 12                   | 123            | 35.8                  | 439    | 48810 | 5.7  | Dolichyl-diphosphooligosaccharide--protein glycosyltransferase 48 kDa subunit precursor                                                                                                                               |
| 512 | UPI0000163BD0    | 12                   | 123            | 34.4                  | 456    | 50702 | 6.4  | dolichyl-diphosphooligosaccharide-protein glycosyltransferase precursor                                                                                                                                               |
| 512 | Q5VWA5           | 12                   | 123            | 34.4                  | 456    | 50801 | 6.5  | Dolichyl-diphosphooligosaccharide-protein glycosyltransferase                                                                                                                                                         |
| 513 | P50552           | 12                   | 24             | 35.5                  | 380    | 39830 | 8.9  | Vasodilator-stimulated phosphoprotein                                                                                                                                                                                 |
| 514 | P38919           | 12                   | 19             | 34.8                  | 411    | 46871 | 6.7  | Eukaryotic initiation factor 4A-III                                                                                                                                                                                   |
| 515 | UPI0000134091    | 12                   | 60             | 34.6                  | 402    | 45978 | 10.2 | 60S ribosomal protein L3 (HIV-1 TAR RNA-binding protein B) (TARBP-B).                                                                                                                                                 |
| 515 | P39023           | 12                   | 60             | 34.5                  | 403    | 46109 | 10.2 | 60S ribosomal protein L3                                                                                                                                                                                              |
| 516 | P22234           | 12                   | 47             | 34.4                  | 425    | 47079 | 7.2  | Multifunctional protein ADE2 [Includes: Phosphoribosylaminoimidazole- succinocarboxamide synthase (EC 6.3.2.6) (SAICAR synthetase); Phosphoribosylaminoimidazole carboxylase (EC 4.1.1.21) (AIR carboxylase) (AIRC)]  |
| 516 | UPI000013D4E4    | 12                   | 47             | 32.4                  | 451    | 49679 | 7.5  | Multifunctional protein ADE2 [Includes: Phosphoribosylaminoimidazole- succinocarboxamide synthase (EC 6.3.2.6) (SAICAR synthetase); Phosphoribosylaminoimidazole carboxylase (EC 4.1.1.21) (AIR carboxylase) (AIRC)]. |
| 517 | Q96D94           | 12                   | 30             | 32.5                  | 499    | 54025 | 5.3  | SIAHBP1 protein                                                                                                                                                                                                       |
| 517 | UPI00004576FF    | 12                   | 30             | 29.9                  | 541    | 58115 | 5.3  | fuse-binding protein-interacting repressor isoform b                                                                                                                                                                  |
| 517 | Q9NZA0           | 12                   | 30             | 29.9                  | 542    | 58172 | 5.3  | FBP-interacting repressor                                                                                                                                                                                             |
| 517 | Q99628           | 12                   | 30             | 29.9                  | 541    | 57996 | 5.3  | Siah binding protein 1                                                                                                                                                                                                |
| 518 | O43390           | 12                   | 51             | 32.4                  | 633    | 70943 | 8.1  | Heterogeneous nuclear ribonucleoprotein R                                                                                                                                                                             |
| 519 | P20042           | 12                   | 21             | 32.4                  | 333    | 38388 | 5.8  | Eukaryotic translation initiation factor 2 subunit 2                                                                                                                                                                  |
| 520 | A4D219           | 12                   | 41             | 32.3                  | 431    | 48294 | 5    | Src homology 3 domain-containing protein HIP-55                                                                                                                                                                       |
| 520 | UPI0000D61C36    | 12                   | 41             | 31.7                  | 438    | 48886 | 5.2  | Drebrin-like protein (SH3 domain-containing protein 7) (Drebrin-F) (Cervical SH3P7) (HPK1-interacting protein of 55 kDa) (HIP-55) (Cervical mucin-associated protein).                                                |
| 520 | Q9UJU6-3         | 12                   | 41             | 31.7                  | 439    | 49042 | 5    | Isoform 3 of Q9UJU6                                                                                                                                                                                                   |
| 521 | P09622           | 12                   | 49             | 31.8                  | 509    | 54150 | 7.7  | Dihydrolipooyl dehydrogenase, mitochondrial precursor                                                                                                                                                                 |
| 521 | Q8WTS4           | 12                   | 49             | 31.8                  | 509    | 54177 | 7.9  | Dihydrolipoamide dehydrogenase                                                                                                                                                                                        |
| 521 | Q59EV8           | 12                   | 49             | 31.2                  | 520    | 55594 | 8.5  | Dihydrolipoamide dehydrogenase, variant                                                                                                                                                                               |
| 522 | P43490           | 12                   | 29             | 31.6                  | 491    | 55521 | 7.2  | Nicotinamide phosphoribosyltransferase                                                                                                                                                                                |
| 523 | P48735           | 12                   | 23             | 31.4                  | 452    | 50909 | 8.7  | Isocitrate dehydrogenase [NADP], mitochondrial precursor (EC 1.1.1.42) (Oxalosuccinate decarboxylase) (IDH) (NADP(+)-specific ICDH)                                                                                   |
| 523 | Q53GL5           | 12                   | 23             | 31.4                  | 452    | 50910 | 8.5  | Isocitrate dehydrogenase 2 (NADP+), mitochondrial variant                                                                                                                                                             |
| 524 | P22570           | 12                   | 17             | 30.3                  | 491    | 53837 | 8.4  | NADPH:adrenodoxin oxidoreductase, mitochondrial precursor (EC 1.18.1.2) (Adrenodoxin reductase) (AR) (Ferredoxin reductase) (Ferredoxin--NADP(+) reductase)                                                           |
| 524 | P22570-2         | 12                   | 17             | 30                    | 497    | 54479 | 8.4  | Isoform Long of P22570                                                                                                                                                                                                |
| 525 | O15371           | 12                   | 41             | 29.4                  | 548    | 63973 | 6    | Eukaryotic translation initiation factor 3 subunit 7                                                                                                                                                                  |
| 526 | Q9H4M9           | 12                   | 28             | 29.4                  | 534    | 60627 | 6.8  | EH domain-containing protein 1                                                                                                                                                                                        |
| 527 | Q5JTV8           | 12                   | 33             | 29.2                  | 583    | 66248 | 8.2  | Torsin-1A-interacting protein 1                                                                                                                                                                                       |
| 528 | P12081           | 12                   | 24             | 27.7                  | 509    | 57411 | 5.9  | Histidyl-tRNA synthetase, cytoplasmic                                                                                                                                                                                 |
| 529 | P55084           | 12                   | 29             | 27.6                  | 474    | 51294 | 9.4  | Trifunctional enzyme subunit beta, mitochondrial precursor (TP-beta) [Includes: 3-ketoacyl-CoA thiolase (EC 2.3.1.16) (Acetyl-CoA acyltransferase) (Beta-ketothiolase)]                                               |

| No. | Accession Number | Unique Peptide Count | Spectrum Count | Sequence Coverage (%) | Length | MolWt  | pI  | Descriptive Name                                                                                                                                                                                              |
|-----|------------------|----------------------|----------------|-----------------------|--------|--------|-----|---------------------------------------------------------------------------------------------------------------------------------------------------------------------------------------------------------------|
| 529 | Q5R1W7           | 12                   | 29             | 27.6                  | 475    | 51396  | 9.4 | Trifunctional enzyme subunit beta, mitochondrial precursor (TP-beta) [Includes: 3-ketoacyl-CoA thiolase (EC 2.3.1.16) (Acetyl-CoA acyltransferase) (Beta-ketothiolase)]                                       |
| 530 | Q02818           | 12                   | 32             | 27.3                  | 461    | 53879  | 5.2 | Nucleobindin-1 precursor                                                                                                                                                                                      |
| 530 | Q53GX6           | 12                   | 32             | 27.3                  | 461    | 53907  | 5.2 | Nucleobindin 1 variant                                                                                                                                                                                        |
| 531 | Q5T0M6           | 12                   | 35             | 26.4                  | 466    | 50316  | 6.6 | Annexin A7                                                                                                                                                                                                    |
| 531 | Q53HM8           | 12                   | 35             | 26.4                  | 466    | 50228  | 7.2 | Annexin VII isoform 1 variant                                                                                                                                                                                 |
| 531 | P20073           | 12                   | 35             | 25.2                  | 488    | 52739  | 5.7 | Annexin A7                                                                                                                                                                                                    |
| 531 | Q5T0M7           | 12                   | 35             | 25.2                  | 488    | 52739  | 5.7 | Annexin A7                                                                                                                                                                                                    |
| 532 | Q96GF2           | 12                   | 31             | 25.1                  | 633    | 68448  | 5.3 | GSPT1 protein                                                                                                                                                                                                 |
| 533 | Q96S43           | 12                   | 69             | 42.2                  | 244    | 27191  | 8.6 | JKTBP1delta6                                                                                                                                                                                                  |
| 533 | Q7KZ75           | 12                   | 69             | 34.2                  | 301    | 33589  | 7.3 | HnRNP JKTBP protein                                                                                                                                                                                           |
| 533 | O14979           | 12                   | 69             | 24.5                  | 420    | 46437  | 9.6 | Heterogeneous nuclear ribonucleoprotein D-like                                                                                                                                                                |
| 534 | Q9Y6M1           | 12                   | 33             | 26.1                  | 556    | 61843  | 8.3 | Insulin-like growth factor 2 mRNA-binding protein 2                                                                                                                                                           |
| 534 | A0A4Z0           | 12                   | 33             | 24.2                  | 598    | 65990  | 8.5 | Insulin-like growth factor 2 mRNA binding protein 2                                                                                                                                                           |
| 535 | P17812           | 12                   | 26             | 24                    | 591    | 66690  | 6.5 | CTP synthase 1                                                                                                                                                                                                |
| 536 | P51659           | 12                   | 28             | 23.4                  | 736    | 79686  | 8.8 | Peroxisomal multifunctional enzyme type 2                                                                                                                                                                     |
| 537 | Q15042           | 12                   | 27             | 17.8                  | 981    | 110524 | 5.6 | Rab3 GTPase-activating protein catalytic subunit                                                                                                                                                              |
| 538 | Q32P28           | 12                   | 51             | 17.7                  | 736    | 83394  | 5.1 | Prolyl 3-hydroxylase 1 precursor                                                                                                                                                                              |
| 539 | O60763           | 12                   | 32             | 16.9                  | 962    | 107895 | 4.9 | General vesicular transport factor p115                                                                                                                                                                       |
| 539 | UPI00001382BE    | 12                   | 32             | 16.9                  | 962    | 107907 | 4.9 | vesicle docking protein p115                                                                                                                                                                                  |
| 539 | Q86TB8           | 12                   | 32             | 16.8                  | 973    | 109187 | 4.9 | Hypothetical protein DKFZp451D234                                                                                                                                                                             |
| 540 | Q9BPX3           | 12                   | 24             | 13.9                  | 1015   | 114334 | 5.6 | Condensin complex subunit 3                                                                                                                                                                                   |
| 541 | UPI000013F0BE    | 12                   | 25             | 13.3                  | 1102   | 128302 | 5.6 | Ubiquitin carboxyl-terminal hydrolase 7 (EC 3.1.2.15) (Ubiquitin thioesterase 7) (Ubiquitin-specific-processing protease 7) (Deubiquitinating enzyme 7) (Herpesvirus-associated ubiquitin-specific protease). |
| 541 | Q93009           | 12                   | 25             | 13.3                  | 1102   | 128272 | 5.6 | Ubiquitin carboxyl-terminal hydrolase 7                                                                                                                                                                       |
| 541 | Q6U8A4           | 12                   | 25             | 13.2                  | 1112   | 129004 | 5.8 | Ubiquitin-specific protease 7 isoform                                                                                                                                                                         |
| 542 | Q7Z460-2         | 12                   | 23             | 10                    | 1471   | 162110 | 8.8 | Isoform 2 of Q7Z460                                                                                                                                                                                           |
| 542 | A2RU21           | 12                   | 23             | 9.9                   | 1479   | 162914 | 8.8 | CLASP1 protein                                                                                                                                                                                                |
| 542 | Q7Z460-3         | 12                   | 23             | 9.8                   | 1494   | 164565 | 8.5 | Isoform 3 of Q7Z460                                                                                                                                                                                           |
| 542 | Q7Z460           | 12                   | 23             | 9.6                   | 1538   | 169450 | 9   | CLIP-associating protein 1                                                                                                                                                                                    |
| 543 | Q53SJ7           | 12                   | 24             | 9.9                   | 1337   | 155520 | 6   | Hypothetical protein ROCK2                                                                                                                                                                                    |
| 543 | O75116           | 12                   | 24             | 9.6                   | 1388   | 160912 | 6   | Rho-associated protein kinase 2                                                                                                                                                                               |
| 543 | UPI000049DEE3    | 12                   | 24             | 9.6                   | 1388   | 160981 | 6.2 | Rho-associated protein kinase 2 (EC 2.7.11.1) (Rho-associated, coiled-coil-containing protein kinase 2) (p164 ROCK-2) (Rho kinase 2).                                                                         |
| 543 | UPI000034ECB0    | 12                   | 24             | 9.6                   | 1388   | 160899 | 6   | Rho-associated, coiled-coil containing protein kinase 2                                                                                                                                                       |
| 544 | P51532           | 12                   | 25             | 8.3                   | 1647   | 184644 | 7.9 | Probable global transcription activator SNF2L4                                                                                                                                                                |
| 544 | Q9HBD4           | 12                   | 25             | 8.2                   | 1679   | 188147 | 8.2 | SMARCA4 isoform 2                                                                                                                                                                                             |
| 545 | UPI0000E265EC    | 12                   | 48             | 4.9                   | 2817   | 308606 | 9.1 | HBxAg transactivated protein 2                                                                                                                                                                                |
| 546 | Q7Z6Z7           | 12                   | 33             | 3.6                   | 4374   | 481896 | 5.2 | E3 ubiquitin-protein ligase HUWE1                                                                                                                                                                             |
| 546 | UPI0000D626C3    | 12                   | 33             | 3.6                   | 4374   | 481985 | 5.2 | HECT, UBA and WWE domain-containing protein 1 (EC 6.3.2.-) (E3 ubiquitin protein ligase URE-B1) (Mcl-1 ubiquitin ligase E3) (Mule) (ARF-binding protein 1) (ARF-BP1).                                         |
| 546 | Q7Z6Z7-3         | 12                   | 33             | 3.6                   | 4365   | 481023 | 5.2 | Isoform 3 of Q7Z6Z7                                                                                                                                                                                           |
| 546 | Q7Z6Z7-2         | 12                   | 33             | 3.6                   | 4358   | 480203 | 5.2 | Isoform 2 of Q7Z6Z7                                                                                                                                                                                           |
| 547 | O75947           | 11                   | 29             | 73.9                  | 161    | 18491  | 5.3 | ATP synthase D chain, mitochondrial                                                                                                                                                                           |
| 548 | P15531           | 11                   | 120            | 69.7                  | 152    | 17149  | 6.2 | Nucleoside diphosphate kinase A                                                                                                                                                                               |
| 549 | P04792           | 11                   | 119            | 67.8                  | 205    | 22783  | 6.4 | Heat-shock protein beta-1                                                                                                                                                                                     |
| 550 | P09211           | 11                   | 157            | 66.2                  | 210    | 23356  | 5.6 | Glutathione S-transferase P                                                                                                                                                                                   |
| 551 | P37235           | 11                   | 44             | 61.1                  | 193    | 22313  | 5.4 | Hippocalcin-like protein 1                                                                                                                                                                                    |
| 552 | P27348           | 11                   | 131            | 60                    | 245    | 27764  | 4.8 | 14-3-3 protein theta                                                                                                                                                                                          |
| 553 | Q13938           | 11                   | 40             | 58.2                  | 189    | 20967  | 4.9 | Calcyphosin                                                                                                                                                                                                   |
| 554 | Q2TNB3           | 11                   | 54             | 56.5                  | 239    | 27349  | 5.6 | Cell migration-inducing protein 22                                                                                                                                                                            |
| 554 | Q9UL46           | 11                   | 54             | 56.5                  | 239    | 27362  | 5.6 | Proteasome activator complex subunit 2                                                                                                                                                                        |
| 554 | Q86SZ7           | 11                   | 54             | 56.5                  | 239    | 27402  | 5.7 | Full-length cDNA clone CS0DJ015YJ12 of T cells (Jurkat cell line) of Homo sapiens                                                                                                                             |
| 555 | Q15907           | 11                   | 71             | 56.4                  | 218    | 24488  | 5.9 | Ras-related protein Rab-11B                                                                                                                                                                                   |
| 555 | Q6FHR0           | 11                   | 71             | 56.4                  | 218    | 24435  | 5.7 | RAB11B protein                                                                                                                                                                                                |
| 556 | P29966           | 11                   | 43             | 53.3                  | 332    | 31555  | 4.4 | Myristoylated alanine-rich C-kinase substrate                                                                                                                                                                 |
| 557 | P30085           | 11                   | 31             | 52.6                  | 196    | 22222  | 5.6 | UMP-CMP kinase                                                                                                                                                                                                |
| 558 | Q13126           | 11                   | 32             | 52.3                  | 283    | 31236  | 7.2 | S-methyl-5-thioadenosine phosphorylase                                                                                                                                                                        |
| 559 | Q15691           | 11                   | 35             | 51.9                  | 268    | 29999  | 5.1 | Microtubule-associated protein RP/EB family member 1                                                                                                                                                          |
| 560 | P21266           | 11                   | 32             | 51.1                  | 225    | 26560  | 5.5 | Glutathione S-transferase Mu 3                                                                                                                                                                                |
| 561 | Q9UUK9           | 11                   | 23             | 50.2                  | 219    | 24328  | 4.9 | ADP-sugar pyrophosphatase                                                                                                                                                                                     |
| 561 | UPI000059D108    | 11                   | 23             | 47.4                  | 232    | 25895  | 5.2 | ADP-sugar pyrophosphatase (EC 3.6.1.13) (EC 3.6.1.-) (Nucleoside diphosphate-linked moiety X motif 5) (Nudix motif 5) (YSA1H).                                                                                |
| 562 | Q99685           | 11                   | 22             | 49.5                  | 303    | 33261  | 7   | Monoglyceride lipase                                                                                                                                                                                          |
| 562 | UPI0000D61B71    | 11                   | 22             | 47.9                  | 313    | 34305  | 6.7 | Monoglyceride lipase (EC 3.1.1.23) (MGL) (HU-K5) (Lysophospholipase homolog) (Lysophospholipase-like).                                                                                                        |



| No. | Accession Number | Unique Peptide Count | Spectrum Count | Sequence Coverage (%) | Length | MolWt | pI  | Descriptive Name                                                                                                                                                                                                                                                |
|-----|------------------|----------------------|----------------|-----------------------|--------|-------|-----|-----------------------------------------------------------------------------------------------------------------------------------------------------------------------------------------------------------------------------------------------------------------|
| 563 | UPI0000456C19    | 11                   | 84             | 64.2                  | 148    | 16102 | 6.6 | Peroxisiredoxin-2 (EC 1.11.1.15) (Thioredoxin peroxidase 1) (Thioredoxin-dependent peroxide reductase 1) (Thiol-specific antioxidant protein) (TSA) (PRP) (Natural killer cell-enhancing factor B) (NKEF-B).                                                    |
| 563 | P32119           | 11                   | 84             | 48                    | 198    | 21892 | 6   | Peroxisiredoxin-2                                                                                                                                                                                                                                               |
| 564 | O14818           | 11                   | 32             | 47.6                  | 248    | 27887 | 8.5 | Proteasome subunit alpha type 7                                                                                                                                                                                                                                 |
| 565 | Q96HJ0           | 11                   | 21             | 45.4                  | 304    | 33831 | 5.6 | V-ckr sarcoma virus CT10 oncogene homolog                                                                                                                                                                                                                       |
| 566 | Q9BWM7           | 11                   | 13             | 45.2                  | 321    | 35503 | 9.1 | Sideroflexin-3                                                                                                                                                                                                                                                  |
| 566 | UPI00004563F7    | 11                   | 13             | 44.6                  | 325    | 35979 | 9   | Sideroflexin-3.                                                                                                                                                                                                                                                 |
| 566 | UPI000006EE3D    | 11                   | 13             | 44.6                  | 325    | 35979 | 9.1 | sideroflexin 3                                                                                                                                                                                                                                                  |
| 567 | P50479           | 11                   | 14             | 44.8                  | 330    | 35398 | 7.9 | PDZ and LIM domain protein 4                                                                                                                                                                                                                                    |
| 568 | P60900           | 11                   | 54             | 44.7                  | 246    | 27399 | 6.7 | Proteasome subunit alpha type 6                                                                                                                                                                                                                                 |
| 569 | Q15717           | 11                   | 35             | 44.5                  | 326    | 36092 | 9.2 | ELAV-like protein 1                                                                                                                                                                                                                                             |
| 570 | Q12904           | 11                   | 15             | 44.2                  | 312    | 34353 | 8.4 | Multisynthetase complex auxiliary component p43 [Contains: Endothelial monocyte-activating polypeptide 2 (EMAP-II) (Small inducible cytokine subfamily E member 1)]                                                                                             |
| 571 | P48739           | 11                   | 26             | 43.9                  | 271    | 31540 | 6.9 | Phosphatidylinositol transfer protein beta isoform                                                                                                                                                                                                              |
| 571 | P48739-2         | 11                   | 26             | 43.8                  | 272    | 31638 | 6.2 | Isoform 2 of P48739                                                                                                                                                                                                                                             |
| 572 | Q16831           | 11                   | 23             | 43.2                  | 310    | 33934 | 7.9 | Uridine phosphorylase 1                                                                                                                                                                                                                                         |
| 573 | P25786           | 11                   | 46             | 42.6                  | 263    | 29556 | 6.6 | Proteasome subunit alpha type 1                                                                                                                                                                                                                                 |
| 573 | Q53YE8           | 11                   | 46             | 42.6                  | 263    | 29598 | 6.6 | Proteasome (Prosome, macropain) subunit, alpha type, 1                                                                                                                                                                                                          |
| 573 | P25786-2         | 11                   | 46             | 41.6                  | 269    | 30239 | 7   | Isoform Long of P25786                                                                                                                                                                                                                                          |
| 574 | P07858           | 11                   | 63             | 41.6                  | 339    | 37822 | 6.3 | Cathepsin B precursor (EC 3.4.22.1) (Cathepsin B1) (APP secretase) (APPS) [Contains: Cathepsin B light chain; Cathepsin B heavy chain]                                                                                                                          |
| 575 | Q9Y5K5-2         | 11                   | 16             | 44.9                  | 316    | 36079 | 5.2 | Isoform 2 of Q9Y5K5                                                                                                                                                                                                                                             |
| 575 | Q9Y5K5-3         | 11                   | 16             | 43.3                  | 328    | 37478 | 5.4 | Isoform 3 of Q9Y5K5                                                                                                                                                                                                                                             |
| 575 | Q9Y5K5           | 11                   | 16             | 43.2                  | 329    | 37607 | 5.3 | Ubiquitin carboxyl-terminal hydrolase isozyme L5                                                                                                                                                                                                                |
| 575 | Q5LJA5           | 11                   | 16             | 40                    | 355    | 40423 | 5.3 | Ubiquitin carboxyl-terminal hydrolase L5                                                                                                                                                                                                                        |
| 575 | Q5LJA9           | 11                   | 16             | 38.6                  | 368    | 41695 | 5.5 | Ubiquitin carboxyl-terminal hydrolase L5                                                                                                                                                                                                                        |
| 576 | Q02978           | 11                   | 43             | 39.2                  | 314    | 34062 | 9.9 | Mitochondrial 2-oxoglutarate/malate carrier protein                                                                                                                                                                                                             |
| 577 | P42765           | 11                   | 16             | 39                    | 397    | 41924 | 8.1 | 3-ketoacyl-CoA thiolase, mitochondrial                                                                                                                                                                                                                          |
| 577 | UPI0000136E5A    | 11                   | 16             | 39                    | 397    | 42039 | 8.3 | acetyl-coenzyme A acyltransferase 2                                                                                                                                                                                                                             |
| 578 | Q9BWF3           | 11                   | 25             | 39                    | 364    | 40314 | 7.1 | RNA-binding protein 4                                                                                                                                                                                                                                           |
| 579 | P46777           | 11                   | 95             | 38.4                  | 297    | 34363 | 9.7 | 60S ribosomal protein L5                                                                                                                                                                                                                                        |
| 580 | P16989           | 11                   | 51             | 37.9                  | 372    | 40090 | 9.8 | DNA-binding protein A                                                                                                                                                                                                                                           |
| 580 | UPI0000128F30    | 11                   | 51             | 37.9                  | 372    | 40060 | 9.8 | cold shock domain protein A                                                                                                                                                                                                                                     |
| 581 | Q9Y295           | 11                   | 26             | 37.6                  | 367    | 40542 | 8.9 | Developmentally-regulated GTP-binding protein 1                                                                                                                                                                                                                 |
| 582 | Q15293           | 11                   | 58             | 37.5                  | 331    | 38890 | 5   | Reticulocalbin-1 precursor                                                                                                                                                                                                                                      |
| 583 | P78417           | 11                   | 28             | 37.3                  | 241    | 27566 | 6.6 | Glutathione transferase omega-1                                                                                                                                                                                                                                 |
| 584 | Q96DB5           | 11                   | 36             | 35.7                  | 314    | 35808 | 8.5 | Protein FAM82B                                                                                                                                                                                                                                                  |
| 584 | UPI0000DD7F20    | 11                   | 36             | 20.7                  | 541    | 59651 | 9.4 | PREDICTED: similar to Protein FAM82B                                                                                                                                                                                                                            |
| 585 | Q9NYB0           | 11                   | 13             | 35.1                  | 399    | 44260 | 4.7 | Telomeric repeat-binding factor 2-interacting protein 1                                                                                                                                                                                                         |
| 586 | Q5D0C4           | 11                   | 56             | 35                    | 397    | 44000 | 9.4 | SERPINE2 protein                                                                                                                                                                                                                                                |
| 587 | P30520           | 11                   | 20             | 34.2                  | 456    | 50097 | 6.6 | Adenylosuccinate synthetase isozyme 2                                                                                                                                                                                                                           |
| 588 | UPI0000D6135C    | 11                   | 56             | 40.6                  | 207    | 23652 | 4.4 | Acidic leucine-rich nuclear phosphoprotein 32 family member A (Potent heat-stable protein phosphatase 2A inhibitor I1PP2A) (Acidic nuclear phosphoprotein pp32) (Leucine-rich acidic nuclear protein) (Lanp) (Putative HLA-DR-associated protein I) (PHAPI) (Ma |
| 588 | Q6PKH8           | 11                   | 56             | 40.2                  | 209    | 24068 | 4.8 | ANP32A protein                                                                                                                                                                                                                                                  |
| 588 | Q08AJ6           | 11                   | 56             | 35.3                  | 238    | 27298 | 4.1 | ANP32A protein                                                                                                                                                                                                                                                  |
| 588 | UPI000049DDE6    | 11                   | 56             | 34                    | 247    | 28325 | 4.1 | Acidic leucine-rich nuclear phosphoprotein 32 family member A (Potent heat-stable protein phosphatase 2A inhibitor I1PP2A) (Acidic nuclear phosphoprotein pp32) (Leucine-rich acidic nuclear protein) (Lanp) (Putative HLA-DR-associated protein I) (PHAPI) (Ma |
| 588 | P39687           | 11                   | 56             | 33.7                  | 249    | 28585 | 4.1 | Acidic leucine-rich nuclear phosphoprotein 32 family member A                                                                                                                                                                                                   |
| 588 | Q53FK4           | 11                   | 56             | 33.7                  | 249    | 28557 | 4.1 | Acidic (Leucine-rich) nuclear phosphoprotein 32 family, member A variant                                                                                                                                                                                        |
| 589 | P11766           | 11                   | 21             | 33.2                  | 374    | 39724 | 7.5 | Alcohol dehydrogenase class 3 (EC 1.1.1.1) (Alcohol dehydrogenase class III) (Alcohol dehydrogenase class chi chain) (S- (hydroxymethyl)glutathione dehydrogenase)                                                                                              |
| 589 | UPI0000D6159C    | 11                   | 21             | 33.2                  | 373    | 39617 | 7.7 | Alcohol dehydrogenase class 3 chi chain (EC 1.1.1.1) (Alcohol dehydrogenase class III chi chain) (S-(hydroxymethyl)glutathione dehydrogenase) (EC 1.1.1.284) (Glutathione-dependent formaldehyde dehydrogenase) (FDH).                                          |
| 589 | Q6FI45           | 11                   | 21             | 33.2                  | 374    | 39690 | 7.5 | ADH5 protein                                                                                                                                                                                                                                                    |
| 590 | P23193           | 11                   | 20             | 33.2                  | 301    | 33970 | 8.4 | Transcription elongation factor A protein 1                                                                                                                                                                                                                     |

| No. | Accession Number | Unique Peptide Count | Spectrum Count | Sequence Coverage (%) | Length | MolWt | pI   | Descriptive Name                                                                                                                                                                                                                   |
|-----|------------------|----------------------|----------------|-----------------------|--------|-------|------|------------------------------------------------------------------------------------------------------------------------------------------------------------------------------------------------------------------------------------|
| 591 | P13995           | 11                   | 15             | 33.1                  | 350    | 37895 | 8.7  | Bifunctional methylenetetrahydrofolate dehydrogenase/cyclohydrolase, mitochondrial precursor [Includes: NAD-dependent methylenetetrahydrofolate dehydrogenase (EC 1.5.1.15); Methenyltetrahydrofolate cyclohydrolase (EC 3.5.4.9)] |
| 592 | P08559           | 11                   | 27             | 32.8                  | 390    | 43296 | 8.1  | Pyruvate dehydrogenase E1 component alpha subunit, somatic form, mitochondrial precursor                                                                                                                                           |
| 593 | O75367           | 11                   | 28             | 32.5                  | 372    | 39617 | 9.8  | Core histone macro-H2A.1                                                                                                                                                                                                           |
| 594 | O00505           | 11                   | 21             | 31.9                  | 521    | 57811 | 4.9  | Importin alpha-3 subunit                                                                                                                                                                                                           |
| 594 | Q81YQ9           | 11                   | 21             | 31.9                  | 521    | 57901 | 4.9  | Karyopherin alpha 3                                                                                                                                                                                                                |
| 595 | AOPJ61           | 11                   | 36             | 30.5                  | 440    | 49490 | 10.1 | Hypothetical protein                                                                                                                                                                                                               |
| 595 | Q32Q62           | 11                   | 36             | 28.9                  | 464    | 52165 | 10.2 | RSL1D1 protein                                                                                                                                                                                                                     |
| 595 | O76021           | 11                   | 36             | 27.3                  | 490    | 54973 | 10.1 | Ribosomal L1 domain-containing protein 1                                                                                                                                                                                           |
| 596 | Q5T9Q6           | 11                   | 19             | 30.4                  | 441    | 48040 | 7.1  | Succinate-CoA ligase, ADP-forming, beta subunit                                                                                                                                                                                    |
| 596 | Q9P2R7           | 11                   | 19             | 28.9                  | 463    | 50317 | 7.4  | Succinyl-CoA ligase [ADP-forming] beta-chain, mitochondrial precursor                                                                                                                                                              |
| 597 | UPI0000163C03    | 11                   | 33             | 30.7                  | 472    | 53216 | 8.7  | DEAD (Asp-Glu-Ala-Asp) box polypeptide 6                                                                                                                                                                                           |
| 597 | P26196           | 11                   | 33             | 30                    | 483    | 54417 | 8.7  | Probable ATP-dependent RNA helicase DDX6                                                                                                                                                                                           |
| 598 | Q53GR7           | 11                   | 19             | 29.6                  | 675    | 74116 | 8.4  | Solute carrier family 25, member 13 (Citrin) variant                                                                                                                                                                               |
| 598 | Q9UJS0           | 11                   | 19             | 29.6                  | 675    | 74176 | 8.6  | Calcium-binding mitochondrial carrier protein Aralar2                                                                                                                                                                              |
| 598 | Q546F9           | 11                   | 19             | 29.6                  | 676    | 74304 | 8.6  | Mitochondrial aspartate-glutamate carrier protein                                                                                                                                                                                  |
| 599 | Q5HYG8           | 11                   | 31             | 30.4                  | 483    | 53465 | 8.2  | Hypothetical protein DKFZp686P09201                                                                                                                                                                                                |
| 599 | P34897           | 11                   | 31             | 29.2                  | 504    | 55993 | 8.5  | Serine hydroxymethyltransferase, mitochondrial precursor                                                                                                                                                                           |
| 599 | Q53ET4           | 11                   | 31             | 29.2                  | 504    | 55974 | 8.4  | Serine hydroxymethyltransferase 2 (Mitochondrial) variant                                                                                                                                                                          |
| 600 | O43175           | 11                   | 18             | 27.8                  | 533    | 56651 | 6.7  | D-3-phosphoglycerate dehydrogenase                                                                                                                                                                                                 |
| 601 | P52292           | 11                   | 30             | 27.4                  | 529    | 57862 | 5.4  | Importin alpha-2 subunit                                                                                                                                                                                                           |
| 601 | Q7Z726           | 11                   | 30             | 27.4                  | 529    | 57876 | 5.4  | Karyopherin alpha 2                                                                                                                                                                                                                |
| 601 | Q6NVVW7          | 11                   | 30             | 27.4                  | 529    | 57965 | 5.4  | Karyopherin alpha 2                                                                                                                                                                                                                |
| 601 | Q53YE3           | 11                   | 30             | 27.4                  | 529    | 57876 | 5.3  | Karyopherin alpha 2                                                                                                                                                                                                                |
| 602 | Q9Y6E2           | 11                   | 29             | 27                    | 419    | 48162 | 6.7  | Basic leucine zipper and W2 domain-containing protein 2                                                                                                                                                                            |
| 603 | Q8IWE2           | 11                   | 17             | 26.1                  | 563    | 60825 | 4.7  | Protein NOXP20                                                                                                                                                                                                                     |
| 603 | UPI00001DFE17    | 11                   | 17             | 26.1                  | 563    | 60742 | 4.7  | family with sequence similarity 114, member A1 (FAM114A1), mRNA                                                                                                                                                                    |
| 604 | P05362           | 11                   | 88             | 25.9                  | 532    | 57825 | 8    | Intercellular adhesion molecule 1 precursor                                                                                                                                                                                        |
| 605 | O43776           | 11                   | 31             | 25.4                  | 548    | 62943 | 6.3  | Asparaginyl-tRNA synthetase, cytoplasmic                                                                                                                                                                                           |
| 606 | O95747           | 11                   | 24             | 25                    | 527    | 58022 | 6.4  | Serine/threonine-protein kinase OSR1                                                                                                                                                                                               |
| 607 | P35052           | 11                   | 53             | 24.9                  | 558    | 61650 | 7.3  | Glypican-1 precursor                                                                                                                                                                                                               |
| 607 | Q53QM4           | 11                   | 53             | 24.9                  | 558    | 61680 | 7.3  | Hypothetical protein GPC1                                                                                                                                                                                                          |
| 608 | Q9H9A6           | 11                   | 13             | 24.8                  | 602    | 68250 | 6.4  | Leucine-rich repeat-containing protein 40                                                                                                                                                                                          |
| 609 | Q08170           | 11                   | 51             | 24.1                  | 494    | 56678 | 11.5 | Splicing factor, arginine/serine-rich 4                                                                                                                                                                                            |
| 610 | Q7Z4X1           | 11                   | 28             | 25.2                  | 612    | 68354 | 5.3  | Cytoplasmic dynein intermediate chain 2C                                                                                                                                                                                           |
| 610 | Q5BJF8           | 11                   | 28             | 25.2                  | 612    | 68426 | 5.3  | DYNC1I2 protein                                                                                                                                                                                                                    |
| 610 | Q32LY9           | 11                   | 28             | 25.2                  | 612    | 68412 | 5.3  | DYNC1I2 protein                                                                                                                                                                                                                    |
| 610 | Q13409-6         | 11                   | 28             | 25.2                  | 611    | 68298 | 5.3  | Isoform 2F of Q13409                                                                                                                                                                                                               |
| 610 | Q13409-2         | 11                   | 28             | 24.4                  | 632    | 70645 | 5.2  | Isoform 2B of Q13409                                                                                                                                                                                                               |
| 610 | Q13409-5         | 11                   | 28             | 24.2                  | 637    | 71328 | 5.2  | Isoform 2E of Q13409                                                                                                                                                                                                               |
| 610 | Q13409           | 11                   | 28             | 24.1                  | 638    | 71457 | 5.2  | Cytoplasmic dynein 1 intermediate chain 2                                                                                                                                                                                          |
| 610 | UPI0000456EA1    | 11                   | 28             | 24                    | 641    | 71709 | 5.2  | Cytoplasmic dynein 1 intermediate chain 2 (Dynein intermediate chain 2, cytosolic) (DH IC-2) (Cytoplasmic dynein intermediate chain 2).                                                                                            |
| 611 | O75390           | 11                   | 23             | 23.8                  | 466    | 51712 | 8.3  | Citrate synthase, mitochondrial precursor                                                                                                                                                                                          |
| 612 | Q5SSJ5           | 11                   | 26             | 23.5                  | 553    | 61207 | 9.7  | Heterochromatin protein 1, binding protein 3                                                                                                                                                                                       |
| 612 | UPI0000D61E73    | 11                   | 26             | 23.4                  | 555    | 61434 | 9.7  | HP1-BP74                                                                                                                                                                                                                           |
| 613 | O75131           | 11                   | 20             | 22.9                  | 537    | 60131 | 5.8  | Copine-3                                                                                                                                                                                                                           |
| 614 | Q13217           | 11                   | 21             | 22.6                  | 504    | 57580 | 6.2  | DnaJ homolog subfamily C member 3                                                                                                                                                                                                  |
| 615 | P17858           | 11                   | 19             | 22.2                  | 780    | 85018 | 7.5  | 6-phosphofructokinase, liver type                                                                                                                                                                                                  |
| 616 | Q9BR63           | 11                   | 52             | 19.5                  | 585    | 65701 | 6.8  | FARSB protein                                                                                                                                                                                                                      |
| 616 | UPI00002096AC    | 11                   | 52             | 19.4                  | 589    | 66116 | 6.8  | phenylalanyl-tRNA synthetase, beta subunit                                                                                                                                                                                         |
| 616 | Q9NSD9           | 11                   | 52             | 19.4                  | 589    | 66130 | 6.8  | Phenylalanyl-tRNA synthetase beta chain                                                                                                                                                                                            |
| 617 | UPI00005A4215    | 11                   | 17             | 21.5                  | 694    | 75927 | 6.6  | PREDICTED: similar to catenin (cadherin-associated protein), beta 1, 88kDa                                                                                                                                                         |
| 617 | UPI00006C0700    | 11                   | 17             | 21.2                  | 702    | 77207 | 6.6  | PREDICTED: similar to Beta-catenin                                                                                                                                                                                                 |
| 617 | UPI0000DD7B92    | 11                   | 17             | 19.3                  | 774    | 84766 | 5.9  | PREDICTED: similar to catenin (cadherin-associated protein), beta 1, 88kDa                                                                                                                                                         |
| 617 | P35222           | 11                   | 17             | 19.1                  | 781    | 85497 | 5.9  | Catenin beta-1                                                                                                                                                                                                                     |
| 618 | P16435           | 11                   | 16             | 18.2                  | 677    | 76690 | 5.6  | NADPH--cytochrome P450 reductase                                                                                                                                                                                                   |
| 619 | P22307           | 11                   | 35             | 17.9                  | 547    | 58994 | 6.9  | Nonspecific lipid-transfer protein                                                                                                                                                                                                 |
| 620 | UPI0000131B9E    | 11                   | 12             | 18.4                  | 738    | 80827 | 6.1  | phospholipase A2-activating protein isoform 2                                                                                                                                                                                      |
| 620 | Q9Y263           | 11                   | 12             | 17.1                  | 795    | 87157 | 6.4  | Phospholipase A-2-activating protein                                                                                                                                                                                               |
| 621 | O94874           | 11                   | 15             | 16.6                  | 794    | 89595 | 6.8  | Uncharacterized protein KIAA0776                                                                                                                                                                                                   |
| 621 | UPI0000D6149C    | 11                   | 15             | 16.6                  | 797    | 89951 | 6.9  | KIAA0776 (KIAA0776), mRNA                                                                                                                                                                                                          |
| 622 | Q6IMN7           | 11                   | 63             | 16                    | 694    | 76862 | 5.1  | Cytoplasmic activation/proliferation-associated protein 1                                                                                                                                                                          |
| 622 | Q9BV09           | 11                   | 63             | 15.7                  | 709    | 78366 | 5.2  | GPI-anchored membrane protein 1                                                                                                                                                                                                    |

| No. | Accession Number | Unique Peptide Count | Spectrum Count | Sequence Coverage (%) | Length | MolWt  | pI   | Descriptive Name                                                                                                                                                                                                         |
|-----|------------------|----------------------|----------------|-----------------------|--------|--------|------|--------------------------------------------------------------------------------------------------------------------------------------------------------------------------------------------------------------------------|
| 622 | UPI0000366799    | 11                   | 63             | 15.6                  | 712    | 78612  | 5.2  | GPI-anchored membrane protein 1 (GPI-anchored protein p137) (p137GPI) (Membrane component chromosome 11 surface marker 1).                                                                                               |
| 623 | P21399           | 11                   | 16             | 15.7                  | 889    | 98399  | 6.7  | Iron-responsive element-binding protein 1                                                                                                                                                                                |
| 624 | Q13619           | 11                   | 23             | 15.4                  | 759    | 87680  | 8.1  | Cullin-4A                                                                                                                                                                                                                |
| 625 | A4D229           | 11                   | 36             | 15.1                  | 893    | 98902  | 8.7  | KIAA1228 protein                                                                                                                                                                                                         |
| 626 | A4D1S4           | 11                   | 18             | 14                    | 902    | 101431 | 8.4  | Zinc finger CCCH type, antiviral 1                                                                                                                                                                                       |
| 626 | UPI0000457619    | 11                   | 18             | 14                    | 902    | 101444 | 8.3  | Zinc finger CCCH type antiviral protein 1 (Zinc finger CCCH domain- containing protein 2).                                                                                                                               |
| 626 | Q7Z2W4           | 11                   | 18             | 14                    | 902    | 101444 | 8.3  | Zinc finger CCCH type antiviral protein 1                                                                                                                                                                                |
| 627 | P35442           | 11                   | 23             | 13                    | 1172   | 129955 | 4.8  | Thrombospondin-2 precursor                                                                                                                                                                                               |
| 627 | Q5R152           | 11                   | 23             | 13                    | 1172   | 129991 | 4.8  | Thrombospondin 2                                                                                                                                                                                                         |
| 628 | A0AVT1           | 11                   | 22             | 12.7                  | 1052   | 117970 | 6.1  | Ubiquitin-activating enzyme E1-like protein 2                                                                                                                                                                            |
| 628 | UPI00001910DA    | 11                   | 22             | 12.7                  | 1052   | 117955 | 6.2  | ubiquitin-activating enzyme E1-like 2                                                                                                                                                                                    |
| 629 | O94855           | 11                   | 20             | 12.5                  | 1032   | 113000 | 7.2  | Protein transport protein Sec24D                                                                                                                                                                                         |
| 629 | UPI00001AEA4F    | 11                   | 20             | 12.5                  | 1032   | 113010 | 7.2  | Protein transport protein Sec24D (SEC24-related protein D).                                                                                                                                                              |
| 629 | Q81YI7           | 11                   | 20             | 12.5                  | 1033   | 113081 | 7.2  | SEC24 related gene family, member D                                                                                                                                                                                      |
| 630 | Q5SQ43           | 11                   | 18             | 12.3                  | 1078   | 113910 | 5.9  | HLA-B associated transcript 3                                                                                                                                                                                            |
| 630 | A3KQ42           | 11                   | 18             | 11.8                  | 1126   | 118693 | 5.6  | HLA-B associated transcript 3                                                                                                                                                                                            |
| 630 | Q5HYL9           | 11                   | 18             | 11.8                  | 1126   | 118725 | 5.6  | Hypothetical protein DKFZp686L0653                                                                                                                                                                                       |
| 630 | UPI0000161DCF    | 11                   | 18             | 11.7                  | 1132   | 119419 | 5.6  | HLA-B associated transcript-3 isoform a                                                                                                                                                                                  |
| 630 | UPI000013C678    | 11                   | 18             | 11.7                  | 1140   | 120258 | 5.6  | HLA-B associated transcript 3                                                                                                                                                                                            |
| 630 | P46379           | 11                   | 18             | 11.7                  | 1132   | 119409 | 5.6  | Large proline-rich protein BAT3                                                                                                                                                                                          |
| 630 | Q5SQ39           | 11                   | 18             | 11.4                  | 1162   | 122342 | 5.7  | HLA-B associated transcript 3                                                                                                                                                                                            |
| 631 | UPI0000D61C7B    | 11                   | 16             | 11.6                  | 1071   | 121188 | 5.4  | Dihydropyridine-sensitive L-type calcium channel subunits alpha- 2/delta precursor [Contains: L-type calcium channel subunit alpha-2; L-type calcium channel subunit delta].                                             |
| 631 | P54289           | 11                   | 16             | 11.4                  | 1091   | 123183 | 5.2  | Dihydropyridine-sensitive L-type calcium channel subunits alpha- 2/delta precursor [Contains: L-type calcium channel subunit alpha-2; L-type calcium channel subunit delta]                                              |
| 631 | Q17R45           | 11                   | 16             | 11.4                  | 1091   | 123183 | 5.2  | Calcium channel, voltage-dependent, alpha 2/delta subunit 1                                                                                                                                                              |
| 631 | Q9UIU0           | 11                   | 16             | 11.2                  | 1110   | 125308 | 5.4  | Dihydropyridine receptor alpha 2 subunit                                                                                                                                                                                 |
| 632 | Q9BXJ9           | 11                   | 21             | 11.4                  | 866    | 101272 | 7.4  | NMDA receptor-regulated protein 1                                                                                                                                                                                        |
| 633 | A2RRC9           | 11                   | 17             | 10.7                  | 1631   | 184517 | 7.5  | IQ motif containing GTPase activating protein 3                                                                                                                                                                          |
| 633 | UPI0000231C93    | 11                   | 17             | 10.7                  | 1631   | 184598 | 7.6  | IQ motif containing GTPase activating protein 3                                                                                                                                                                          |
| 633 | UPI000021D298    | 11                   | 17             | 10.7                  | 1633   | 184856 | 7.6  | Ras GTPase-activating-like protein IQGAP3.                                                                                                                                                                               |
| 633 | Q86VI3           | 11                   | 17             | 10.7                  | 1631   | 184545 | 7.5  | Ras GTPase-activating-like protein IQGAP3                                                                                                                                                                                |
| 633 | Q5T3H8           | 11                   | 17             | 10.7                  | 1631   | 184698 | 7.6  | IQ motif containing GTPase activating protein 3                                                                                                                                                                          |
| 634 | O95239           | 11                   | 16             | 10.2                  | 1232   | 139881 | 6.3  | Chromosome-associated kinesin KIF4A                                                                                                                                                                                      |
| 635 | Q29RF7           | 11                   | 25             | 9.7                   | 1337   | 150830 | 7.9  | SCC-112 protein                                                                                                                                                                                                          |
| 636 | P78357           | 11                   | 17             | 9.3                   | 1384   | 156266 | 7.1  | Contactin-associated protein 1 precursor                                                                                                                                                                                 |
| 636 | UPI0000D62337    | 11                   | 17             | 9.3                   | 1384   | 156280 | 7.1  | Contactin-associated protein 1 precursor (Caspr) (Caspr1) (Neurexin 4) (Neurexin IV) (p190).                                                                                                                             |
| 637 | Q13523           | 11                   | 18             | 9                     | 1007   | 116973 | 10.3 | Serine/threonine-protein kinase PRP4 homolog                                                                                                                                                                             |
| 637 | Q8IVC3           | 11                   | 18             | 9                     | 1007   | 116991 | 10.3 | PRP4 pre-mRNA processing factor 4 homolog B                                                                                                                                                                              |
| 637 | Q5TAY8           | 11                   | 18             | 9                     | 1007   | 116987 | 10.3 | PRP4 pre-mRNA processing factor 4 homolog B                                                                                                                                                                              |
| 638 | P30086           | 10                   | 25             | 74.9                  | 187    | 21057  | 7.5  | Phosphatidylethanolamine-binding protein 1 (PEBP-1) (Prostatic-binding protein) (HCNPPP) (Neuropolypeptide h3) (Raf kinase inhibitor protein) (RKIP) [Contains: Hippocampal cholinergic neurostimulating peptide (HCNP)] |
| 639 | UPI00005E7FE3    | 10                   | 69             | 68.9                  | 167    | 19488  | 8.4  | Tubulin--tyrosine ligase-like protein 3 (HOTTL).                                                                                                                                                                         |
| 639 | P59998           | 10                   | 69             | 68.5                  | 168    | 19667  | 8.4  | Actin-related protein 2/3 complex subunit 4                                                                                                                                                                              |
| 640 | P28066           | 10                   | 53             | 66                    | 241    | 26411  | 4.8  | Proteasome subunit alpha type 5                                                                                                                                                                                          |
| 641 | P60660           | 10                   | 83             | 62.9                  | 151    | 16930  | 4.7  | Myosin light polypeptide 6                                                                                                                                                                                               |
| 641 | Q561V9           | 10                   | 83             | 62.9                  | 151    | 16961  | 4.6  | Myosin, light chain 6, alkali, smooth muscle and non-muscle                                                                                                                                                              |
| 641 | UPI0000D62206    | 10                   | 83             | 60.9                  | 156    | 17353  | 4.7  | Myosin light polypeptide 6 (Smooth muscle and nonmuscle myosin light chain alkali 6) (Myosin light chain alkali 3) (Myosin light chain 3) (MLC-3) (LC17).                                                                |
| 642 | P32969           | 10                   | 90             | 62                    | 192    | 21863  | 10   | 60S ribosomal protein L9                                                                                                                                                                                                 |
| 643 | Q04917           | 10                   | 53             | 60.2                  | 246    | 28219  | 4.8  | 14-3-3 protein eta                                                                                                                                                                                                       |
| 644 | A2VCL0           | 10                   | 646            | 57.8                  | 102    | 11377  | 11.4 | HIST2H4B protein                                                                                                                                                                                                         |
| 644 | P62805           | 10                   | 646            | 57.3                  | 103    | 11367  | 11.4 | Histone H4                                                                                                                                                                                                               |
| 645 | P07203           | 10                   | 45             | 56.2                  | 201    | 21899  | 6.5  | Glutathione peroxidase 1                                                                                                                                                                                                 |
| 645 | UPI00001B07C3    | 10                   | 45             | 55.7                  | 203    | 21938  | 6.5  | glutathione peroxidase 1 isoform 1                                                                                                                                                                                       |
| 646 | P62249           | 10                   | 110            | 55.5                  | 146    | 16445  | 10.2 | 40S ribosomal protein S16                                                                                                                                                                                                |
| 647 | P61026           | 10                   | 72             | 54                    | 200    | 22541  | 8.4  | Ras-related protein Rab-10                                                                                                                                                                                               |
| 647 | UPI0000072ACD    | 10                   | 72             | 54                    | 200    | 22469  | 8.6  | ras-related GTP-binding protein RAB10                                                                                                                                                                                    |
| 648 | P28074           | 10                   | 28             | 53.8                  | 208    | 22897  | 8.5  | Proteasome subunit beta type 5 precursor                                                                                                                                                                                 |
| 648 | Q7Z3B5           | 10                   | 28             | 42.1                  | 266    | 28810  | 6.5  | Hypothetical protein DKFZp686I0180                                                                                                                                                                                       |
| 649 | P62269           | 10                   | 140            | 52.6                  | 152    | 17719  | 11   | 40S ribosomal protein S18                                                                                                                                                                                                |
| 650 | Q15126           | 10                   | 24             | 52.6                  | 192    | 21995  | 5.7  | Phosphomevalonate kinase                                                                                                                                                                                                 |
| 651 | O75347           | 10                   | 42             | 51.9                  | 108    | 12855  | 5.3  | Tubulin-specific chaperone A                                                                                                                                                                                             |
| 652 | Q9H9B4           | 10                   | 14             | 51.6                  | 322    | 35619  | 9.1  | Sideroflexin-1                                                                                                                                                                                                           |

| No. | Accession Number | Unique Peptide Count | Spectrum Count | Sequence Coverage (%) | Length | MolWt | pI  | Descriptive Name                                                                                                                                                                         |
|-----|------------------|----------------------|----------------|-----------------------|--------|-------|-----|------------------------------------------------------------------------------------------------------------------------------------------------------------------------------------------|
| 653 | O43399           | 10                   | 38             | 51.5                  | 206    | 22238 | 5.4 | Tumor protein D54                                                                                                                                                                        |
| 653 | UPI0000D610E3    | 10                   | 38             | 48.4                  | 219    | 23739 | 6.2 | Tumor protein D54 (hD54) (Tumor protein D52-like 2).                                                                                                                                     |
| 653 | Q5U0E0           | 10                   | 38             | 48.2                  | 220    | 23787 | 5.7 | Tumor protein D52-like 2                                                                                                                                                                 |
| 653 | Q5JWU6           | 10                   | 38             | 46.3                  | 229    | 24854 | 6.4 | Tumor protein D52-like 2                                                                                                                                                                 |
| 654 | P47755           | 10                   | 58             | 49.3                  | 286    | 32949 | 5.8 | F-actin capping protein subunit alpha-2                                                                                                                                                  |
| 654 | Q53GC7           | 10                   | 58             | 49.3                  | 286    | 32967 | 5.8 | Capping protein (Actin filament) muscle Z-line, alpha 2 variant                                                                                                                          |
| 655 | P19623           | 10                   | 16             | 49                    | 302    | 33825 | 5.5 | Spermidine synthase                                                                                                                                                                      |
| 656 | P00491           | 10                   | 30             | 47.4                  | 289    | 32118 | 6.9 | Purine nucleoside phosphorylase                                                                                                                                                          |
| 657 | O95571           | 10                   | 18             | 47.2                  | 254    | 27873 | 6.8 | ETHE1 protein, mitochondrial precursor                                                                                                                                                   |
| 658 | Q99598           | 10                   | 14             | 47.2                  | 290    | 33112 | 6.6 | Translin-associated protein X                                                                                                                                                            |
| 659 | Q96AG4           | 10                   | 92             | 45.9                  | 307    | 34930 | 9.6 | Leucine-rich repeat-containing protein 59                                                                                                                                                |
| 660 | UPI0000129B77    | 10                   | 47             | 45.9                  | 290    | 31371 | 8.1 | mitochondrial short-chain enoyl-coenzyme A hydratase 1 precursor                                                                                                                         |
| 661 | Q04760           | 10                   | 40             | 44                    | 184    | 20778 | 5.3 | Lactoylglutathione lyase                                                                                                                                                                 |
| 662 | Q06664           | 10                   | 34             | 43.8                  | 434    | 47047 | 5.4 | Mannose-6-phosphate receptor-binding protein 1                                                                                                                                           |
| 663 | Q14257           | 10                   | 22             | 43.8                  | 317    | 36876 | 4.4 | Reticulocalbin-2 precursor                                                                                                                                                               |
| 664 | P62873           | 10                   | 61             | 43.2                  | 340    | 37377 | 6   | Guanine nucleotide-binding protein G(I)/G(S)/G(T) subunit beta 1                                                                                                                         |
| 665 | Q15417           | 10                   | 52             | 42.6                  | 329    | 36414 | 6.1 | Calponin-3                                                                                                                                                                               |
| 666 | Q92820           | 10                   | 45             | 41.8                  | 318    | 35964 | 7.1 | Gamma-glutamyl hydrolase precursor                                                                                                                                                       |
| 667 | P53004           | 10                   | 34             | 41.6                  | 296    | 33428 | 6.4 | Biliverdin reductase A precursor                                                                                                                                                         |
| 668 | P11177-2         | 10                   | 24             | 43.4                  | 341    | 37200 | 5.9 | Isoform 2 of P11177                                                                                                                                                                      |
| 668 | P11177           | 10                   | 24             | 41.2                  | 359    | 39233 | 6.6 | Pyruvate dehydrogenase E1 component subunit beta, mitochondrial precursor                                                                                                                |
| 668 | UPI0000161B07    | 10                   | 24             | 41.2                  | 359    | 39249 | 6.6 | pyruvate dehydrogenase (lipoamide) beta                                                                                                                                                  |
| 669 | P36543           | 10                   | 32             | 41.2                  | 226    | 26145 | 8   | Vacuolar ATP synthase subunit E 1                                                                                                                                                        |
| 670 | Q16698           | 10                   | 32             | 41.2                  | 335    | 36068 | 9.3 | 2,4-dienoyl-CoA reductase, mitochondrial precursor                                                                                                                                       |
| 671 | P15121           | 10                   | 29             | 39.9                  | 316    | 35853 | 7   | Aldose reductase                                                                                                                                                                         |
| 672 | P62826           | 10                   | 78             | 39.8                  | 216    | 24423 | 7.5 | GTP-binding nuclear protein Ran                                                                                                                                                          |
| 673 | P55036           | 10                   | 20             | 39.3                  | 377    | 40737 | 4.8 | 26S proteasome non-ATPase regulatory subunit 4                                                                                                                                           |
| 674 | P35249           | 10                   | 11             | 38.8                  | 363    | 39682 | 8   | Replication factor C subunit 4                                                                                                                                                           |
| 675 | Q53HL6           | 10                   | 31             | 37.2                  | 374    | 42471 | 5.6 | Dendritic cell protein variant                                                                                                                                                           |
| 675 | Q7L2H7           | 10                   | 31             | 37.2                  | 374    | 42503 | 5.6 | PCI domain containing 1                                                                                                                                                                  |
| 676 | Q15785           | 10                   | 34             | 36.9                  | 309    | 34559 | 9   | Mitochondrial import receptor subunit TOM34                                                                                                                                              |
| 677 | Q5BKY2           | 10                   | 37             | 36.1                  | 349    | 39610 | 6.4 | Hypothetical protein                                                                                                                                                                     |
| 677 | O15372           | 10                   | 37             | 35.8                  | 352    | 39930 | 6.5 | Eukaryotic translation initiation factor 3 subunit 3                                                                                                                                     |
| 677 | Q53HR0           | 10                   | 37             | 35.8                  | 352    | 39914 | 6.5 | Eukaryotic translation initiation factor 3, subunit 3 gamma, 40kDa variant                                                                                                               |
| 677 | Q53HG0           | 10                   | 37             | 35.8                  | 352    | 39870 | 6.5 | Eukaryotic translation initiation factor 3, subunit 3 gamma, 40kDa variant                                                                                                               |
| 678 | P61163           | 10                   | 27             | 35.6                  | 376    | 42614 | 6.6 | Alpha-centractin                                                                                                                                                                         |
| 679 | P09110           | 10                   | 19             | 35.4                  | 424    | 44292 | 8.4 | 3-ketoacyl-CoA thiolase, peroxisomal precursor                                                                                                                                           |
| 680 | P25685           | 10                   | 20             | 35.3                  | 340    | 38044 | 8.6 | DnaJ homolog subfamily B member 1                                                                                                                                                        |
| 680 | Q6F151           | 10                   | 20             | 35.3                  | 340    | 38010 | 8.6 | DNAJB1 protein                                                                                                                                                                           |
| 681 | Q9UKM9           | 10                   | 56             | 34.6                  | 306    | 32463 | 9.2 | RNA-binding protein Raly                                                                                                                                                                 |
| 681 | Q53GL6           | 10                   | 56             | 34.5                  | 307    | 32550 | 9.2 | RNA binding protein (Autoantigenic, hnRNP-associated with lethal yellow) long isoform variant (RNA binding protein, autoantigenic) (HnRNP-associated with lethal yellow homolog (Mouse)) |
| 682 | Q96199           | 10                   | 19             | 34.3                  | 432    | 46511 | 6.4 | Succinyl-CoA ligase [GDP-forming] beta-chain, mitochondrial precursor                                                                                                                    |
| 683 | O00303           | 10                   | 45             | 34.2                  | 357    | 37564 | 5.4 | Eukaryotic translation initiation factor 3 subunit 5                                                                                                                                     |
| 684 | P62191           | 10                   | 53             | 31.4                  | 440    | 49185 | 6.2 | 26S protease regulatory subunit 4                                                                                                                                                        |
| 684 | Q53HB3           | 10                   | 53             | 31.4                  | 440    | 49213 | 6.2 | Proteasome 26S ATPase subunit 1 variant                                                                                                                                                  |
| 685 | Q9BS26           | 10                   | 23             | 31.3                  | 406    | 46971 | 5.3 | Thioredoxin domain-containing protein 4 precursor                                                                                                                                        |
| 686 | Q8NFW8           | 10                   | 20             | 31.1                  | 434    | 48379 | 7.9 | N-acylneuraminate cytidyltransferase                                                                                                                                                     |
| 687 | P51572           | 10                   | 289            | 30.9                  | 246    | 27992 | 8.4 | B-cell receptor-associated protein 31                                                                                                                                                    |
| 687 | Q53HT6           | 10                   | 289            | 30.9                  | 246    | 27962 | 8.4 | B-cell receptor-associated protein 31 variant                                                                                                                                            |
| 687 | Q53G72           | 10                   | 289            | 30.9                  | 246    | 27931 | 8.4 | B-cell receptor-associated protein 31 variant                                                                                                                                            |
| 688 | Q9BRK5           | 10                   | 21             | 30.7                  | 362    | 41807 | 4.9 | 45 kDa calcium-binding protein precursor                                                                                                                                                 |
| 689 | Q13148           | 10                   | 34             | 29.5                  | 414    | 44740 | 6.2 | TAR DNA-binding protein 43                                                                                                                                                               |
| 690 | P49257           | 10                   | 77             | 28.6                  | 510    | 57549 | 6.8 | ERGIC-53 protein precursor                                                                                                                                                               |
| 690 | Q53FS4           | 10                   | 77             | 28.6                  | 510    | 57558 | 6.8 | Lectin, mannose-binding, 1 variant                                                                                                                                                       |
| 691 | P15311           | 10                   | 47             | 28.3                  | 586    | 69413 | 6.3 | Ezrin                                                                                                                                                                                    |
| 691 | Q6NUR7           | 10                   | 47             | 28.3                  | 586    | 69242 | 6.3 | Villin 2                                                                                                                                                                                 |
| 691 | UPI0000D61508    | 10                   | 47             | 28.2                  | 589    | 69688 | 6.3 | Ezrin (p81) (Cytovillin) (Villin-2).                                                                                                                                                     |
| 692 | P21283           | 10                   | 22             | 27.2                  | 382    | 43942 | 7.5 | Vacuolar ATP synthase subunit C                                                                                                                                                          |
| 693 | P30533           | 10                   | 15             | 26.3                  | 357    | 41466 | 8.8 | Alpha-2-macroglobulin receptor-associated protein precursor                                                                                                                              |
| 694 | P54727           | 10                   | 34             | 25.9                  | 409    | 43171 | 4.8 | UV excision repair protein RAD23 homolog B                                                                                                                                               |
| 695 | UPI000013EA6E    | 10                   | 25             | 25.9                  | 621    | 69721 | 6.2 | fragile X mental retardation-related protein 1 isoform a                                                                                                                                 |
| 696 | Q6FIA3           | 10                   | 19             | 25.8                  | 445    | 51353 | 5.4 | PACSIN2 protein                                                                                                                                                                          |
| 696 | Q9UNF0           | 10                   | 19             | 23.7                  | 486    | 55739 | 5.2 | Protein kinase C and casein kinase substrate in neurons protein 2                                                                                                                        |
| 697 | Q9NPQ8-2         | 10                   | 17             | 25.6                  | 524    | 58846 | 6.6 | Isoform 2 of Q9NPQ8                                                                                                                                                                      |
| 697 | Q9NPQ8           | 10                   | 17             | 25.3                  | 530    | 59612 | 5.3 | Synembryon-A                                                                                                                                                                             |

| No. | Accession Number | Unique Peptide Count | Spectrum Count | Sequence Coverage (%) | Length | MolWt  | pI  | Descriptive Name                                                                                                                                                                                                                                                                                                   |
|-----|------------------|----------------------|----------------|-----------------------|--------|--------|-----|--------------------------------------------------------------------------------------------------------------------------------------------------------------------------------------------------------------------------------------------------------------------------------------------------------------------|
| 697 | UPI0000037C19    | 10                   | 17             | 25                    | 537    | 60372  | 5.3 | resistance to inhibitors of cholinesterase 8 homolog A                                                                                                                                                                                                                                                             |
| 697 | Q9NPQ8-3         | 10                   | 17             | 25                    | 536    | 60275  | 5.3 | Isoform 3 of Q9NPQ8                                                                                                                                                                                                                                                                                                |
| 698 | P50995           | 10                   | 23             | 25.1                  | 505    | 54390  | 7.7 | Annexin A11                                                                                                                                                                                                                                                                                                        |
| 699 | O00425           | 10                   | 25             | 25                    | 579    | 63720  | 8.9 | Insulin-like growth factor 2 mRNA-binding protein 3                                                                                                                                                                                                                                                                |
| 699 | UPI0000117172    | 10                   | 25             | 25                    | 579    | 63705  | 8.9 | insulin-like growth factor 2 mRNA binding protein 3                                                                                                                                                                                                                                                                |
| 700 | Q96EW9           | 10                   | 14             | 24.1                  | 585    | 64989  | 9   | Eukaryotic translation initiation factor 2A, 65kDa                                                                                                                                                                                                                                                                 |
| 700 | UPI00000473DB    | 10                   | 14             | 24.1                  | 585    | 64990  | 8.9 | eukaryotic translation initiation factor 2A                                                                                                                                                                                                                                                                        |
| 700 | Q96K81           | 10                   | 14             | 24.1                  | 585    | 64986  | 8.9 | CDNA FLJ14450 fis, clone HEMBB1001736, weakly similar to EUKARYOTIC TRANSLATION INITIATION FACTOR 3 SUBUNIT 9                                                                                                                                                                                                      |
| 700 | UPI000045718C    | 10                   | 14             | 23.2                  | 608    | 67707  | 8.9 | eukaryotic translation initiation factor 2A                                                                                                                                                                                                                                                                        |
| 700 | Q9BY44           | 10                   | 14             | 23.2                  | 609    | 67851  | 9   | Eukaryotic translation initiation factor 2A 65 kDa                                                                                                                                                                                                                                                                 |
| 701 | O94808           | 10                   | 28             | 23.8                  | 682    | 76931  | 7.4 | Glucosamine--fructose-6-phosphate aminotransferase [isomerizing] 2                                                                                                                                                                                                                                                 |
| 701 | UPI000049E025    | 10                   | 28             | 23.7                  | 684    | 77190  | 7.5 | Glucosamine--fructose-6-phosphate aminotransferase [isomerizing] 2 (EC 2.6.1.16) (Hexosephosphate aminotransferase 2) (D-fructose-6-phosphate amidotransferase 2) (GFAT 2) (GFAT2).                                                                                                                                |
| 702 | O95817           | 10                   | 14             | 23.8                  | 575    | 61595  | 7   | BAG family molecular chaperone regulator 3                                                                                                                                                                                                                                                                         |
| 703 | O95302           | 10                   | 27             | 23.5                  | 570    | 63084  | 5.1 | FK506-binding protein 9 precursor                                                                                                                                                                                                                                                                                  |
| 704 | P13674           | 10                   | 19             | 23.4                  | 534    | 61049  | 6   | Prolyl 4-hydroxylase subunit alpha-1 precursor                                                                                                                                                                                                                                                                     |
| 704 | Q5V5Q6           | 10                   | 19             | 23.4                  | 534    | 60967  | 6   | Procollagen-proline, 2-oxoglutarate 4-dioxygenase (Proline 4- hydroxylase), alpha polypeptide I (Procollagen-proline, 2-oxoglutarate 4-dioxygenase (Proline 4-hydroxylase), alpha polypeptide I variant)                                                                                                           |
| 705 | Q8WZA9           | 10                   | 17             | 21.3                  | 623    | 62717  | 4.9 | Immunity-related GTPase family Q protein                                                                                                                                                                                                                                                                           |
| 706 | P06865           | 10                   | 22             | 21.2                  | 529    | 60689  | 5.2 | Beta-hexosaminidase alpha chain precursor                                                                                                                                                                                                                                                                          |
| 706 | Q6AI32           | 10                   | 22             | 21.2                  | 529    | 60719  | 5.1 | Hypothetical protein DKFZp781C13106                                                                                                                                                                                                                                                                                |
| 707 | Q9Y310           | 10                   | 32             | 21.2                  | 505    | 55210  | 7.2 | UPF0027 protein C22orf28                                                                                                                                                                                                                                                                                           |
| 708 | Q6NZY4           | 10                   | 12             | 20.5                  | 707    | 78577  | 4.9 | Zinc finger CCHC domain-containing protein 8                                                                                                                                                                                                                                                                       |
| 709 | P31040           | 10                   | 26             | 20.2                  | 664    | 72692  | 7.4 | Succinate dehydrogenase [ubiquinone] flavoprotein subunit, mitochondrial precursor                                                                                                                                                                                                                                 |
| 710 | Q96HC4           | 10                   | 15             | 20                    | 596    | 63972  | 8.2 | PDZ and LIM domain protein 5                                                                                                                                                                                                                                                                                       |
| 710 | UPI00004C9B11    | 10                   | 15             | 20                    | 596    | 64002  | 8.2 | PDZ and LIM domain 5 isoform a                                                                                                                                                                                                                                                                                     |
| 711 | Q12996           | 10                   | 21             | 19.2                  | 717    | 82922  | 8.1 | Cleavage stimulation factor 77 kDa subunit                                                                                                                                                                                                                                                                         |
| 712 | Q14694           | 10                   | 20             | 18.8                  | 798    | 87134  | 5.3 | Ubiquitin carboxyl-terminal hydrolase 10                                                                                                                                                                                                                                                                           |
| 713 | UPI00001619DB    | 10                   | 18             | 20.8                  | 499    | 53481  | 4.8 | RAN binding protein 3 isoform RANBP3-b                                                                                                                                                                                                                                                                             |
| 713 | Q9H6Z4-3         | 10                   | 18             | 20.8                  | 499    | 53411  | 4.8 | Isoform 3 of Q9H6Z4                                                                                                                                                                                                                                                                                                |
| 713 | UPI00001AE593    | 10                   | 18             | 18.6                  | 560    | 59465  | 4.8 | Ran-binding protein 3 (RanBP3).                                                                                                                                                                                                                                                                                    |
| 713 | Q9H6Z4-2         | 10                   | 18             | 18.5                  | 562    | 59694  | 4.8 | Isoform 2 of Q9H6Z4                                                                                                                                                                                                                                                                                                |
| 713 | Q9H6Z4           | 10                   | 18             | 18.3                  | 567    | 60210  | 4.8 | Ran-binding protein 3                                                                                                                                                                                                                                                                                              |
| 714 | Q9NVP1           | 10                   | 21             | 18.2                  | 670    | 75407  | 9.5 | ATP-dependent RNA helicase DDX18                                                                                                                                                                                                                                                                                   |
| 715 | Q9Y2J2-2         | 10                   | 17             | 18.2                  | 865    | 96514  | 5.4 | Isoform B of Q9Y2J2                                                                                                                                                                                                                                                                                                |
| 716 | Q10471           | 10                   | 77             | 18                    | 571    | 64733  | 8.4 | Polypeptide N-acetylgalactosaminyltransferase 2 (EC 2.4.1.41) (Protein-UDP acetylgalactosaminyltransferase 2) (UDP-GalNAc:polypeptide N-acetylgalactosaminyltransferase 2) (Polypeptide GalNAc transferase 2) (GalNAc-T2) (pp-GalNTase 2) [Contains: Polypeptide N-acetylgalactosaminyltransferase 2 soluble form] |
| 717 | Q08945           | 10                   | 25             | 17.9                  | 709    | 81075  | 6.9 | FACT complex subunit SSRP1                                                                                                                                                                                                                                                                                         |
| 718 | P42224           | 10                   | 28             | 17.3                  | 750    | 87335  | 6.1 | Signal transducer and activator of transcription 1-alpha/beta                                                                                                                                                                                                                                                      |
| 718 | Q68D00           | 10                   | 28             | 17.3                  | 750    | 87363  | 6.1 | Hypothetical protein DKFZp686B04100                                                                                                                                                                                                                                                                                |
| 719 | P18084           | 10                   | 30             | 16.8                  | 799    | 88054  | 6.1 | Integrin beta-5 precursor                                                                                                                                                                                                                                                                                          |
| 719 | UPI0000DD7BBB    | 10                   | 30             | 14                    | 958    | 104706 | 7.3 | PREDICTED: similar to Integrin beta-5 precursor                                                                                                                                                                                                                                                                    |
| 720 | Q9Y5L0-4         | 10                   | 27             | 16.5                  | 909    | 102541 | 5.6 | Isoform 4 of Q9Y5L0                                                                                                                                                                                                                                                                                                |
| 720 | A4D1K9           | 10                   | 27             | 16.3                  | 923    | 104203 | 5.6 | Transportin 3                                                                                                                                                                                                                                                                                                      |
| 721 | Q8N1F7           | 10                   | 26             | 16.2                  | 819    | 93488  | 5.7 | Nuclear pore complex protein Nup93                                                                                                                                                                                                                                                                                 |
| 721 | UPI0000070C22    | 10                   | 26             | 16.2                  | 819    | 93557  | 5.8 | nucleoporin 93kDa                                                                                                                                                                                                                                                                                                  |
| 722 | Q96RP9           | 10                   | 15             | 16                    | 751    | 83472  | 7   | Elongation factor G 1, mitochondrial precursor                                                                                                                                                                                                                                                                     |
| 722 | UPI0000D61B9E    | 10                   | 15             | 15.9                  | 753    | 83632  | 7   | Elongation factor G 1, mitochondrial precursor (mEF-G 1) (Elongation factor G1).                                                                                                                                                                                                                                   |
| 723 | P51812           | 10                   | 10             | 15.7                  | 740    | 83736  | 6.9 | Ribosomal protein S6 kinase alpha-3                                                                                                                                                                                                                                                                                |
| 724 | P46087           | 10                   | 31             | 15.6                  | 812    | 89302  | 9.2 | Putative RNA methyltransferase NOL1                                                                                                                                                                                                                                                                                |
| 724 | UPI0000D62194    | 10                   | 31             | 15                    | 846    | 92974  | 9.2 | Proliferating-cell nucleolar antigen p120 (Proliferation-associated nucleolar protein p120).                                                                                                                                                                                                                       |
| 724 | Q3KQS4           | 10                   | 31             | 15                    | 845    | 92860  | 9.2 | NOL1 protein                                                                                                                                                                                                                                                                                                       |
| 725 | Q14137           | 10                   | 18             | 15                    | 746    | 83630  | 6.2 | Ribosome biogenesis protein BOP1                                                                                                                                                                                                                                                                                   |
| 726 | Q86YQ0           | 10                   | 17             | 15                    | 765    | 84721  | 8.1 | HZGJ                                                                                                                                                                                                                                                                                                               |
| 727 | UPI000015C445    | 10                   | 16             | 15.7                  | 875    | 98503  | 5.4 | aminopeptidase puromycin sensitive                                                                                                                                                                                                                                                                                 |
| 727 | P55786           | 10                   | 16             | 14.9                  | 919    | 103276 | 5.7 | Puromycin-sensitive aminopeptidase                                                                                                                                                                                                                                                                                 |
| 728 | P33991           | 10                   | 23             | 14.6                  | 863    | 96558  | 6.7 | DNA replication licensing factor MCM4                                                                                                                                                                                                                                                                              |
| 729 | Q9BUJ2-4         | 10                   | 20             | 16.3                  | 756    | 84794  | 8.8 | Isoform 4 of Q9BUJ2                                                                                                                                                                                                                                                                                                |
| 729 | Q9BUJ2-2         | 10                   | 20             | 15.3                  | 804    | 90292  | 6.9 | Isoform 2 of Q9BUJ2                                                                                                                                                                                                                                                                                                |

| No. | Accession Number | Unique Peptide Count | Spectrum Count | Sequence Coverage (%) | Length | MolWt   | pI  | Descriptive Name                                                                                                                                                               |
|-----|------------------|----------------------|----------------|-----------------------|--------|---------|-----|--------------------------------------------------------------------------------------------------------------------------------------------------------------------------------|
| 729 | Q9BUJ2           | 10                   | 20             | 14.4                  | 856    | 95739   | 6.9 | Heterogeneous nuclear ribonucleoprotein U-like protein 1                                                                                                                       |
| 730 | P46977           | 10                   | 117            | 14.2                  | 705    | 80472   | 8.2 | Dolichyl-diphosphooligosaccharide--protein glycosyltransferase subunit STT3A                                                                                                   |
| 730 | Q8WUB4           | 10                   | 117            | 14.2                  | 705    | 80530   | 8.1 | STT3, subunit of the oligosaccharyltransferase complex, homolog A                                                                                                              |
| 731 | Q8NE71           | 10                   | 30             | 13.6                  | 845    | 95926   | 6.8 | ATP-binding cassette sub-family F member 1                                                                                                                                     |
| 732 | P42566           | 10                   | 12             | 13.1                  | 896    | 98656   | 4.6 | Epidermal growth factor receptor substrate 15                                                                                                                                  |
| 733 | Q2TBF3           | 10                   | 11             | 13.1                  | 900    | 97675   | 6.9 | MTHFD1L protein                                                                                                                                                                |
| 733 | Q9UFU8           | 10                   | 11             | 12.9                  | 917    | 99439   | 6.9 | Hypothetical protein DKFZp586G1517                                                                                                                                             |
| 733 | Q6UB35           | 10                   | 11             | 12.1                  | 978    | 105790  | 8.1 | C1-tetrahydrofolate synthase (EC 6.3.4.3) (EC 3.5.4.9) (EC 1.5.1.5) (Methylenetetrahydrofolate dehydrogenase (NADP+ dependent) 1-like)                                         |
| 734 | Q59E90           | 10                   | 27             | 12.7                  | 1007   | 113305  | 7.2 | Mannosidase, alpha, class 2B, member 1 variant                                                                                                                                 |
| 735 | Q8N163           | 10                   | 18             | 11.7                  | 923    | 102902  | 5.2 | Protein KIAA1967                                                                                                                                                               |
| 735 | UPI00001AEEB7    | 10                   | 18             | 11.7                  | 925    | 103030  | 5.2 | p30 DBC protein                                                                                                                                                                |
| 735 | Q8N163-2         | 10                   | 18             | 11.7                  | 923    | 103143  | 5.4 | Isoform 2 of Q8N163                                                                                                                                                            |
| 736 | Q5JRX3           | 10                   | 14             | 10.6                  | 1037   | 117455  | 7   | Presequence protease, mitochondrial precursor                                                                                                                                  |
| 736 | UPI00001F8A38    | 10                   | 14             | 10.6                  | 1037   | 117413  | 6.9 | metalloprotease 1                                                                                                                                                              |
| 736 | UPI000013C859    | 10                   | 14             | 10.6                  | 1037   | 117410  | 7   | Presequence protease, mitochondrial precursor (EC 3.4.24.-) (hPreP) (Pitriysin metalloproteinase 1) (Metalloprotease 1) (hMP1).                                                |
| 736 | Q5JRX3-2         | 10                   | 14             | 10.6                  | 1038   | 117554  | 7   | Isoform 2 of Q5JRX3                                                                                                                                                            |
| 737 | Q9H2G2-2         | 10                   | 21             | 10.3                  | 1204   | 138995  | 5.1 | Isoform 2 of Q9H2G2                                                                                                                                                            |
| 737 | Q9H2G2           | 10                   | 21             | 10                    | 1235   | 142695  | 5.1 | STE20-like serine/threonine-protein kinase                                                                                                                                     |
| 738 | Q8TAQ2-2         | 10                   | 32             | 10.2                  | 1130   | 124841  | 5.6 | Isoform 2 of Q8TAQ2                                                                                                                                                            |
| 738 | Q59G16           | 10                   | 32             | 9.9                   | 1156   | 127377  | 5.5 | SWI/SNF-related matrix-associated actin-dependent regulator of chromatin c2 isoform b variant                                                                                  |
| 738 | Q59GV3           | 10                   | 32             | 9.9                   | 1164   | 128088  | 5.6 | SWI/SNF-related matrix-associated actin-dependent regulator of chromatin c2 isoform b variant                                                                                  |
| 738 | Q8TAQ2           | 10                   | 32             | 9.5                   | 1214   | 132879  | 5.7 | SWI/SNF-related matrix-associated actin-dependent regulator of chromatin subfamily C member 2                                                                                  |
| 739 | Q9H2M9           | 10                   | 19             | 9.4                   | 1393   | 155984  | 5.6 | Rab3 GTPase-activating protein non-catalytic subunit                                                                                                                           |
| 739 | UPI00004562FB    | 10                   | 19             | 9.4                   | 1393   | 155941  | 5.6 | Rab3 GTPase-activating protein non-catalytic subunit (Rab3 GTPase- activating protein 150 kDa subunit) (Rab3-GAP p150) (Rab3-GAP regulatory subunit) (RAB3-GAP150) (RGAP-iso). |
| 740 | Q7Z406           | 10                   | 31             | 8.9                   | 1995   | 228000  | 5.9 | Myosin-14                                                                                                                                                                      |
| 740 | UPI0000E59250    | 10                   | 31             | 8.9                   | 2003   | 228663  | 5.6 | myosin, heavy chain 14 isoform 1                                                                                                                                               |
| 740 | UPI0000E5924F    | 10                   | 31             | 8.9                   | 1995   | 227868  | 5.6 | myosin, heavy chain 14 isoform 2                                                                                                                                               |
| 740 | Q7Z406-2         | 10                   | 31             | 8.8                   | 2028   | 231214  | 5.6 | Isoform 2 of Q7Z406                                                                                                                                                            |
| 741 | Q9UKV3           | 10                   | 20             | 8.8                   | 1341   | 151887  | 6.4 | Apoptotic chromatin condensation inducer in the nucleus                                                                                                                        |
| 741 | UPI000013D308    | 10                   | 20             | 8.8                   | 1341   | 151861  | 6.4 | Apoptotic chromatin condensation inducer in the nucleus (Acinus).                                                                                                              |
| 742 | O75694           | 10                   | 28             | 8.7                   | 1391   | 155199  | 6.2 | Nuclear pore complex protein Nup155                                                                                                                                            |
| 743 | Q9NQW6           | 10                   | 22             | 8.6                   | 1124   | 124199  | 8.1 | Actin-binding protein anillin                                                                                                                                                  |
| 744 | Q5SW79           | 10                   | 17             | 8.3                   | 1584   | 175292  | 7.1 | Centrosomal protein of 170 kDa                                                                                                                                                 |
| 744 | UPI000045632C    | 10                   | 17             | 8.3                   | 1585   | 175435  | 7.2 | centrosomal protein 170kDa isoform gamma                                                                                                                                       |
| 745 | A0JLU0           | 10                   | 19             | 7.5                   | 1414   | 144138  | 8.5 | Hypothetical protein                                                                                                                                                           |
| 745 | UPI0000D61693    | 10                   | 19             | 7.5                   | 1412   | 144411  | 9   | Treacher Collins-Franceschetti syndrome 1 isoform b                                                                                                                            |
| 745 | UPI000045736E    | 10                   | 19             | 7.5                   | 1411   | 144314  | 9   | Treacher Collins-Franceschetti syndrome 1 isoform b                                                                                                                            |
| 745 | Q13428-2         | 10                   | 19             | 7.5                   | 1412   | 144411  | 9   | Isoform 2 of Q13428                                                                                                                                                            |
| 745 | UPI0000D61694    | 10                   | 19             | 7.3                   | 1451   | 148350  | 8.9 | Treacher Collins-Franceschetti syndrome 1 isoform b                                                                                                                            |
| 745 | UPI00004B247E    | 10                   | 19             | 7.3                   | 1450   | 148253  | 8.9 | Treacher Collins-Franceschetti syndrome 1 isoform a                                                                                                                            |
| 745 | Q13428-3         | 10                   | 19             | 7.1                   | 1489   | 152203  | 9   | Isoform 3 of Q13428                                                                                                                                                            |
| 745 | Q13428           | 10                   | 19             | 7.1                   | 1488   | 152103  | 9   | Treacle protein                                                                                                                                                                |
| 745 | Q13428-4         | 10                   | 19             | 7                     | 1524   | 155926  | 8.9 | Isoform 4 of Q13428                                                                                                                                                            |
| 746 | Q8WZ42           | 10                   | 13             | 0.3                   | 34350  | 3816081 | 6.3 | Titin                                                                                                                                                                          |
| 746 | UPI0000DACAD1    | 10                   | 13             | 0.3                   | 33423  | 3713573 | 6.5 | titin isoform N2-A                                                                                                                                                             |
| 746 | Q8WZ42-8         | 10                   | 13             | 0.3                   | 34474  | 3829767 | 6.4 | Isoform 8 of Q8WZ42                                                                                                                                                            |
| 746 | Q8WZ42-7         | 10                   | 13             | 0.3                   | 33615  | 3734713 | 6.5 | Isoform 7 of Q8WZ42                                                                                                                                                            |
| 746 | Q8WZ42-5         | 10                   | 13             | 0.3                   | 32900  | 3653161 | 6.4 | Isoform 5 of Q8WZ42                                                                                                                                                            |
| 746 | Q8WZ42-4         | 10                   | 13             | 0.3                   | 33445  | 3716096 | 6.5 | Isoform 4 of Q8WZ42                                                                                                                                                            |
| 746 | Q8WZ42-2         | 10                   | 13             | 0.3                   | 34258  | 3805759 | 6.3 | Isoform 2 of Q8WZ42                                                                                                                                                            |
| 747 | Q8NBT2           | 9                    | 28             | 66.5                  | 197    | 22443   | 4.7 | Kinetochore protein Spc24                                                                                                                                                      |
| 748 | Q01469           | 9                    | 33             | 65.2                  | 135    | 15164   | 7   | Fatty acid-binding protein, epidermal                                                                                                                                          |
| 749 | P84085           | 9                    | 71             | 63.3                  | 180    | 20530   | 6.8 | ADP-ribosylation factor 5                                                                                                                                                      |
| 750 | Q9BSD7           | 9                    | 14             | 61.1                  | 190    | 20713   | 9.5 | Probable UPF0334 kinase-like protein C1orf57                                                                                                                                   |
| 751 | Q9UNM1           | 9                    | 133            | 61.9                  | 97     | 10295   | 9   | Chaperonin 10-related protein                                                                                                                                                  |
| 751 | P61604           | 9                    | 133            | 58.8                  | 102    | 10932   | 8.9 | 10 kDa heat shock protein, mitochondrial                                                                                                                                       |
| 752 | P63208           | 9                    | 13             | 58.3                  | 163    | 18658   | 4.5 | S-phase kinase-associated protein 1A                                                                                                                                           |
| 753 | Q06830           | 9                    | 67             | 56.8                  | 199    | 22110   | 8.1 | Peroxiredoxin-1                                                                                                                                                                |
| 754 | P25787           | 9                    | 44             | 56.4                  | 234    | 25899   | 7.4 | Proteasome subunit alpha type 2                                                                                                                                                |

| No. | Accession Number | Unique Peptide Count | Spectrum Count | Sequence Coverage (%) | Length | MolWt | pI   | Descriptive Name                                                                                                              |
|-----|------------------|----------------------|----------------|-----------------------|--------|-------|------|-------------------------------------------------------------------------------------------------------------------------------|
| 754 | Q53GF5           | 9                    | 44             | 56.4                  | 234    | 25841 | 8    | Proteasome alpha 2 subunit variant                                                                                            |
| 755 | P62081           | 9                    | 83             | 56.2                  | 194    | 22127 | 10.1 | 40S ribosomal protein S7                                                                                                      |
| 756 | Q9Y2B0           | 9                    | 33             | 56                    | 182    | 20652 | 4.9  | MIR-interacting saposin-like protein precursor                                                                                |
| 757 | Q9GZZ1           | 9                    | 14             | 55.6                  | 169    | 19398 | 8.8  | N-acetyltransferase 13                                                                                                        |
| 758 | O95816           | 9                    | 31             | 55.5                  | 211    | 23772 | 6.7  | BAG family molecular chaperone regulator 2                                                                                    |
| 759 | Q9P0J0           | 9                    | 26             | 54.2                  | 144    | 16698 | 8.4  | NADH dehydrogenase [ubiquinone] 1 alpha subcomplex subunit 13                                                                 |
| 759 | UPI0000163BED    | 9                    | 26             | 34.4                  | 227    | 25865 | 9.8  | cell death-regulatory protein GRIM19                                                                                          |
| 760 | Q9BUF5           | 9                    | 23             | 52.7                  | 446    | 49857 | 4.9  | Tubulin beta-6 chain                                                                                                          |
| 761 | Q99653           | 9                    | 32             | 52.3                  | 195    | 22456 | 5.1  | Calcium-binding protein p22                                                                                                   |
| 762 | P39019           | 9                    | 151            | 50.3                  | 145    | 16060 | 10.3 | 40S ribosomal protein S19                                                                                                     |
| 762 | Q8WVX7           | 9                    | 151            | 46.5                  | 157    | 17282 | 10.5 | Ribosomal protein S19                                                                                                         |
| 763 | P00492           | 9                    | 34             | 49.5                  | 218    | 24579 | 6.7  | Hypoxanthine-guanine phosphoribosyltransferase                                                                                |
| 763 | Q6LET3           | 9                    | 34             | 49.5                  | 218    | 24588 | 6.8  | HPRT1 protein                                                                                                                 |
| 764 | Q9NP72           | 9                    | 32             | 49.5                  | 206    | 22977 | 5.2  | Ras-related protein Rab-18                                                                                                    |
| 765 | Q9H2J4           | 9                    | 13             | 47.7                  | 239    | 27614 | 4.8  | Phosducin-like protein 3                                                                                                      |
| 766 | Q96DI7           | 9                    | 14             | 47.1                  | 357    | 39311 | 8.1  | WD repeat protein 57                                                                                                          |
| 767 | P62241           | 9                    | 87             | 46.6                  | 208    | 24205 | 10.3 | 40S ribosomal protein S8                                                                                                      |
| 768 | P61254           | 9                    | 79             | 45.5                  | 145    | 17258 | 10.6 | 60S ribosomal protein L26                                                                                                     |
| 768 | Q6IBH6           | 9                    | 79             | 45.5                  | 145    | 17244 | 10.6 | RPL26 protein                                                                                                                 |
| 769 | Q9H444           | 9                    | 18             | 45.5                  | 224    | 24950 | 4.8  | Charged multivesicular body protein 4b                                                                                        |
| 770 | Q6ICE6           | 9                    | 48             | 45                    | 271    | 30069 | 5.5  | COMT protein                                                                                                                  |
| 771 | Q9NX63           | 9                    | 62             | 44.9                  | 227    | 26152 | 8.3  | Coiled-coil-helix-coiled-coil-helix domain-containing protein 3                                                               |
| 772 | Q5TIF8           | 9                    | 29             | 46.1                  | 232    | 25615 | 7.9  | Adenylate kinase 2                                                                                                            |
| 772 | P54819           | 9                    | 29             | 44.8                  | 239    | 26478 | 7.8  | Adenylate kinase isoenzyme 2, mitochondrial                                                                                   |
| 773 | UPI00002263A8    | 9                    | 31             | 47.5                  | 183    | 20345 | 5.3  | sorcin isoform b                                                                                                              |
| 773 | P30626           | 9                    | 31             | 43.9                  | 198    | 21676 | 5.6  | Sorcin                                                                                                                        |
| 774 | Q96HX4           | 9                    | 14             | 43.8                  | 274    | 28649 | 7.5  | Proline-5-carboxylate reductase-like                                                                                          |
| 775 | Q0MQG7           | 9                    | 36             | 43.7                  | 263    | 30168 | 7.5  | NADH dehydrogenase [ubiquinone] iron-sulfur protein 3, mitochondrial precursor                                                |
| 775 | O75489           | 9                    | 36             | 43.6                  | 264    | 30242 | 7.5  | NADH dehydrogenase [ubiquinone] iron-sulfur protein 3, mitochondrial precursor                                                |
| 776 | P62158           | 9                    | 39             | 43                    | 149    | 16838 | 4.2  | Calmodulin                                                                                                                    |
| 777 | P18669           | 9                    | 52             | 42.9                  | 254    | 28804 | 7.2  | Phosphoglycerate mutase 1                                                                                                     |
| 777 | UPI00001AF8FE    | 9                    | 52             | 42.9                  | 254    | 28850 | 7.2  | PREDICTED: similar to Phosphoglycerate mutase 1 (Phosphoglycerate mutase isozyme B) (PGAM-B) (BPG-dependent PGAM 1) isoform 1 |
| 777 | Q6P6D7           | 9                    | 52             | 42.9                  | 254    | 28820 | 7.2  | Phosphoglycerate mutase 1                                                                                                     |
| 777 | Q53G35           | 9                    | 52             | 42.9                  | 254    | 28832 | 7.2  | Phosphoglycerate mutase 1 (Brain) variant                                                                                     |
| 778 | P24539           | 9                    | 57             | 42.6                  | 256    | 28909 | 9.4  | ATP synthase B chain, mitochondrial precursor                                                                                 |
| 779 | UPI000045684C    | 9                    | 43             | 42.4                  | 250    | 26552 | 9.6  | Deoxyuridine 5'-triphosphate nucleotidohydrolase, mitochondrial precursor (EC 3.6.1.23) (dUTPase) (dUTP pyrophosphatase).     |
| 779 | P33316           | 9                    | 43             | 42.1                  | 252    | 26706 | 9.6  | Deoxyuridine 5'-triphosphate nucleotidohydrolase, mitochondrial precursor                                                     |
| 779 | Q6NSA3           | 9                    | 43             | 42.1                  | 252    | 26563 | 9.4  | DUTP pyrophosphatase                                                                                                          |
| 780 | Q92520           | 9                    | 87             | 41.9                  | 227    | 24680 | 8.3  | Protein FAM3C precursor                                                                                                       |
| 781 | Q9Y6C9           | 9                    | 23             | 41.6                  | 303    | 33331 | 8    | Mitochondrial carrier homolog 2                                                                                               |
| 782 | P29218           | 9                    | 28             | 40.1                  | 277    | 30189 | 5.3  | Inositol monophosphatase (EC 3.1.3.25) (IMPase) (IMP) (Inositol-1(or 4)-monophosphatase)                                      |
| 783 | P46109           | 9                    | 14             | 39.9                  | 303    | 33777 | 6.7  | Crk-like protein                                                                                                              |
| 784 | Q9Y3A5           | 9                    | 31             | 39.6                  | 250    | 28764 | 8.7  | Shwachman-Bodian-Diamond syndrome protein                                                                                     |
| 785 | O75521           | 9                    | 14             | 38.7                  | 359    | 39609 | 8.6  | Peroxisomal 3,2-trans-enoyl-CoA isomerase (EC 5.3.3.8) (Dodecenoyl-CoA isomerase) (Delta(3),delta(2)-enoyl-CoA isomerase)     |
| 785 | Q53HG3           | 9                    | 14             | 38.2                  | 364    | 40111 | 8.9  | Peroxisomal D3,D2-enoyl-CoA isomerase isoform 1 variant                                                                       |
| 785 | Q53GC8           | 9                    | 14             | 38.2                  | 364    | 40211 | 8.8  | Peroxisomal D3,D2-enoyl-CoA isomerase isoform 1 variant                                                                       |
| 786 | P52565           | 9                    | 37             | 38.7                  | 204    | 23207 | 5.1  | Rho GDP-dissociation inhibitor 1                                                                                              |
| 787 | P61313           | 9                    | 92             | 38.2                  | 204    | 24146 | 11.6 | 60S ribosomal protein L15                                                                                                     |
| 787 | Q5T6E0           | 9                    | 92             | 38.2                  | 204    | 24174 | 11.6 | Ribosomal protein L15 pseudogene 3                                                                                            |
| 788 | Q3B7K3           | 9                    | 15             | 38.2                  | 267    | 30368 | 9    | IKIP protein                                                                                                                  |
| 789 | Q9UBQ7           | 9                    | 27             | 37.5                  | 328    | 35668 | 7.4  | Glyoxylate reductase/hydroxypyruvate reductase                                                                                |
| 790 | Q53H82           | 9                    | 11             | 36.8                  | 288    | 32790 | 6.8  | Lactamase beta-2                                                                                                              |
| 790 | Q9Y392           | 9                    | 11             | 36.8                  | 288    | 32806 | 6.8  | CGI-83 protein                                                                                                                |
| 791 | O75821           | 9                    | 29             | 36.6                  | 320    | 35611 | 6.1  | Eukaryotic translation initiation factor 3 subunit 4                                                                          |
| 792 | P09661           | 9                    | 35             | 36.5                  | 255    | 28416 | 8.6  | U2 small nuclear ribonucleoprotein A'                                                                                         |
| 792 | Q53G61           | 9                    | 35             | 36.5                  | 255    | 28402 | 8.6  | Small nuclear ribonucleoprotein polypeptide A' variant                                                                        |
| 792 | Q53G21           | 9                    | 35             | 36.5                  | 255    | 28474 | 8.6  | Small nuclear ribonucleoprotein polypeptide A' variant                                                                        |
| 793 | P51665           | 9                    | 47             | 36.4                  | 324    | 37025 | 6.8  | 26S proteasome non-ATPase regulatory subunit 7                                                                                |
| 794 | Q12771           | 9                    | 78             | 36.4                  | 286    | 31481 | 7.4  | P37 AUF1                                                                                                                      |
| 794 | Q14103-4         | 9                    | 78             | 36.2                  | 287    | 30672 | 8.4  | Isoform 4 of Q14103                                                                                                           |
| 794 | Q14103-3         | 9                    | 78             | 34                    | 306    | 32835 | 8.2  | Isoform 3 of Q14103                                                                                                           |

| No. | Accession Number | Unique Peptide Count | Spectrum Count | Sequence Coverage (%) | Length | MolWt  | pI   | Descriptive Name                                                                                                                     |
|-----|------------------|----------------------|----------------|-----------------------|--------|--------|------|--------------------------------------------------------------------------------------------------------------------------------------|
| 794 | UPI0000D6158B    | 9                    | 78             | 31.5                  | 330    | 36464  | 8.5  | Heterogeneous nuclear ribonucleoprotein D0 (hnRNP D0) (AU-rich element RNA-binding protein 1).                                       |
| 794 | Q14103-2         | 9                    | 78             | 31                    | 336    | 36272  | 8.1  | Isoform 2 of Q14103                                                                                                                  |
| 794 | Q14103           | 9                    | 78             | 29.3                  | 355    | 38434  | 7.8  | Heterogeneous nuclear ribonucleoprotein D0                                                                                           |
| 795 | P61421           | 9                    | 23             | 36.2                  | 351    | 40329  | 5    | Vacuolar ATP synthase subunit d                                                                                                      |
| 796 | Q0QEY7           | 9                    | 18             | 39.6                  | 255    | 28906  | 8.5  | Succinate dehydrogenase complex subunit B                                                                                            |
| 796 | P21912           | 9                    | 18             | 36.1                  | 280    | 31630  | 8.8  | Succinate dehydrogenase [ubiquinone] iron-sulfur subunit, mitochondrial precursor                                                    |
| 797 | Q14165           | 9                    | 26             | 35.6                  | 292    | 32234  | 5.4  | Uncharacterized protein KIAA0152 precursor                                                                                           |
| 798 | P06748-2         | 9                    | 177            | 39.2                  | 265    | 29465  | 4.6  | Isoform 2 of P06748                                                                                                                  |
| 798 | P06748           | 9                    | 177            | 35.4                  | 294    | 32575  | 4.8  | Nucleophosmin                                                                                                                        |
| 799 | P15559           | 9                    | 75             | 35.4                  | 274    | 30868  | 8.9  | NAD(P)H dehydrogenase [quinone] 1 (EC 1.6.5.2) (Quinone reductase 1) (NAD(P)H:quinone oxidoreductase 1)                              |
| 800 | P09486           | 9                    | 15             | 35.3                  | 303    | 34632  | 4.8  | SPARC precursor                                                                                                                      |
| 801 | P30154           | 9                    | 18             | 34.1                  | 601    | 66214  | 4.9  | Serine/threonine-protein phosphatase 2A 65 kDa regulatory subunit A beta isoform                                                     |
| 801 | Q8NHV8           | 9                    | 18             | 30.7                  | 667    | 73585  | 5.1  | Protein phosphatase 2 (Formerly 2A), regulatory subunit A, beta isoform                                                              |
| 802 | Q53GS5           | 9                    | 11             | 33.8                  | 352    | 39934  | 4.5  | SYAP1 protein variant                                                                                                                |
| 802 | Q96A49           | 9                    | 11             | 33.8                  | 352    | 39933  | 4.5  | Synapse-associated protein 1                                                                                                         |
| 803 | P61289           | 9                    | 33             | 33.5                  | 254    | 29506  | 6    | Proteasome activator complex subunit 3                                                                                               |
| 803 | P61289-2         | 9                    | 33             | 31.8                  | 267    | 30887  | 6.1  | Isoform 2 of P61289                                                                                                                  |
| 804 | P63092           | 9                    | 15             | 32.5                  | 394    | 45665  | 5.8  | Guanine nucleotide-binding protein G(s) subunit alpha isoforms short                                                                 |
| 804 | UPI000004D202    | 9                    | 15             | 32.4                  | 395    | 45752  | 5.8  | GNAS complex locus isoform f                                                                                                         |
| 804 | UPI0000456FBC    | 9                    | 15             | 14.1                  | 908    | 97549  | 5.3  | Neuroendocrine secretory protein 55 (NESP55) [Contains: LHAL tetrapeptide; GPIPIRRH peptide].                                        |
| 804 | Q5JWF2           | 9                    | 15             | 12.3                  | 1037   | 111024 | 5    | Guanine nucleotide-binding protein G(s) subunit alpha isoforms XLas                                                                  |
| 805 | O00233           | 9                    | 17             | 32.3                  | 223    | 24654  | 7    | 26S proteasome non-ATPase regulatory subunit 9                                                                                       |
| 805 | UPI000013D207    | 9                    | 17             | 32.3                  | 223    | 24682  | 7    | proteasome 26S non-ATPase subunit 9                                                                                                  |
| 806 | O43684           | 9                    | 29             | 32.3                  | 328    | 37155  | 6.8  | Mitotic checkpoint protein BUB3                                                                                                      |
| 807 | P35250           | 9                    | 17             | 31.9                  | 354    | 39157  | 6.4  | Replication factor C subunit 2                                                                                                       |
| 808 | P62424           | 9                    | 53             | 31.6                  | 266    | 29996  | 10.6 | 60S ribosomal protein L7a                                                                                                            |
| 808 | UPI0000D62425    | 9                    | 53             | 31.1                  | 270    | 30548  | 10.7 | similar to 60S ribosomal protein L7a (Surfeit locus protein 3) (LOC645846), mRNA                                                     |
| 809 | Q96BS4           | 9                    | 26             | 38.8                  | 260    | 28449  | 9.4  | FBL protein                                                                                                                          |
| 809 | P22087           | 9                    | 26             | 31.5                  | 321    | 33784  | 10.2 | rRNA 2'-O-methyltransferase fibrillar                                                                                                |
| 810 | P31689           | 9                    | 21             | 31.5                  | 397    | 44868  | 7.1  | DnaJ homolog subfamily A member 1                                                                                                    |
| 811 | P36542           | 9                    | 36             | 31.5                  | 298    | 32996  | 9.2  | ATP synthase gamma chain, mitochondrial precursor                                                                                    |
| 812 | Q5JNZ9           | 9                    | 23             | 31.9                  | 420    | 47273  | 5    | Retinoblastoma binding protein 7                                                                                                     |
| 812 | Q16576           | 9                    | 23             | 31.5                  | 425    | 47820  | 5    | Histone-binding protein RBBP7                                                                                                        |
| 812 | Q5JP00           | 9                    | 23             | 28.6                  | 469    | 52314  | 5.3  | Retinoblastoma binding protein 7                                                                                                     |
| 813 | P31153           | 9                    | 31             | 31.4                  | 395    | 43661  | 6.5  | S-adenosylmethionine synthetase isoform type-2                                                                                       |
| 813 | UPI0000DB12F5    | 9                    | 31             | 31.3                  | 396    | 43748  | 6.5  | S-adenosylmethionine synthetase isoform type-                                                                                        |
| 814 | Q9H2U2-3         | 9                    | 22             | 34.1                  | 305    | 34658  | 8.5  | Isoform 3 of Q9H2U2                                                                                                                  |
| 814 | Q9H2U2           | 9                    | 22             | 31.1                  | 334    | 37920  | 7.4  | Inorganic pyrophosphatase 2, mitochondrial precursor                                                                                 |
| 814 | Q9H2U2-2         | 9                    | 22             | 29.8                  | 349    | 39638  | 6.9  | Isoform 2 of Q9H2U2                                                                                                                  |
| 815 | O43837           | 9                    | 23             | 30.9                  | 385    | 42212  | 8.5  | Isocitrate dehydrogenase [NAD] subunit beta, mitochondrial precursor (EC 1.1.1.41) (Isocitric dehydrogenase) (NAD(+)-specific ICDH)  |
| 815 | UPI00004709E4    | 9                    | 23             | 30.7                  | 387    | 42411  | 8.5  | Isocitrate dehydrogenase [NAD] subunit beta, mitochondrial precursor (EC 1.1.1.41) (Isocitric dehydrogenase) (NAD(+)-specific ICDH). |
| 816 | P31350           | 9                    | 13             | 30.8                  | 389    | 44878  | 5.4  | Ribonucleoside-diphosphate reductase M2 subunit                                                                                      |
| 817 | O14908           | 9                    | 21             | 30.6                  | 333    | 36049  | 6.3  | PDZ domain-containing protein GIPC1                                                                                                  |
| 818 | Q8TDN6           | 9                    | 18             | 30.6                  | 353    | 41401  | 9.9  | Brix domain-containing protein 2                                                                                                     |
| 819 | P49585           | 9                    | 16             | 30                    | 367    | 41732  | 6.9  | Choline-phosphate cytidyltransferase A                                                                                               |
| 819 | Q86Y88           | 9                    | 16             | 30                    | 367    | 41731  | 7.3  | Phosphate cytidyltransferase 1, choline, alpha                                                                                       |
| 820 | UPI00004BEBE5    | 9                    | 26             | 29.6                  | 392    | 43449  | 8    | TIA-1 related protein isoform 2                                                                                                      |
| 821 | Q13077           | 9                    | 17             | 29.3                  | 416    | 46164  | 6.1  | TNF receptor-associated factor 1                                                                                                     |
| 822 | Q3ZCQ8           | 9                    | 23             | 28.6                  | 353    | 39646  | 8.4  | Import inner membrane translocase subunit TIM50, mitochondrial precursor                                                             |
| 822 | Q3ZCQ8-2         | 9                    | 23             | 22.1                  | 456    | 50465  | 9.4  | Isoform 2 of Q3ZCQ8                                                                                                                  |
| 823 | Q9GZL7           | 9                    | 11             | 28.6                  | 423    | 47708  | 5.9  | WD repeat protein 12                                                                                                                 |
| 824 | Q9NVD7           | 9                    | 19             | 28.2                  | 372    | 42244  | 5.9  | Alpha-parvin                                                                                                                         |
| 825 | Q9Y617           | 9                    | 12             | 28.1                  | 370    | 40423  | 7.7  | Phosphoserine aminotransferase                                                                                                       |
| 826 | Q9Y266           | 9                    | 33             | 27.8                  | 331    | 38243  | 5.4  | Nuclear migration protein nudC                                                                                                       |
| 827 | Q6NZI2           | 9                    | 49             | 27.4                  | 390    | 43476  | 5.6  | Polymerase I and transcript release factor                                                                                           |
| 828 | P09543           | 9                    | 30             | 26.8                  | 421    | 47579  | 9.1  | 2',3'-cyclic-nucleotide 3'-phosphodiesterase                                                                                         |
| 829 | Q2VP93           | 9                    | 27             | 25.9                  | 343    | 39602  | 5.6  | Protein arginine methyltransferase 1                                                                                                 |
| 829 | Q6LEU5           | 9                    | 27             | 25.6                  | 347    | 39929  | 5.6  | HRMT1L2 protein                                                                                                                      |
| 829 | Q8WUW5           | 9                    | 27             | 25.3                  | 352    | 40417  | 5.5  | PRMT1 protein                                                                                                                        |
| 829 | UPI000013CBFF    | 9                    | 27             | 24.8                  | 359    | 41255  | 5.5  | Protein arginine N-methyltransferase 1 (EC 2.1.1.-) (Interferon receptor 1-bound protein 4).                                         |



| No. | Accession Number | Unique Peptide Count | Spectrum Count | Sequence Coverage (%) | Length | MolWt | pI   | Descriptive Name                                                                                                                                                                                                                                                                                                                                                                                        |
|-----|------------------|----------------------|----------------|-----------------------|--------|-------|------|---------------------------------------------------------------------------------------------------------------------------------------------------------------------------------------------------------------------------------------------------------------------------------------------------------------------------------------------------------------------------------------------------------|
| 830 | Q92783-2         | 9                    | 14             | 34.5                  | 403    | 44972 | 4.9  | Isoform 2 of Q92783                                                                                                                                                                                                                                                                                                                                                                                     |
| 830 | Q92783           | 9                    | 14             | 25.7                  | 540    | 59180 | 4.8  | Signal transducing adapter molecule 1                                                                                                                                                                                                                                                                                                                                                                   |
| 831 | Q9UGI8           | 9                    | 12             | 25.7                  | 421    | 47996 | 7.7  | Testin                                                                                                                                                                                                                                                                                                                                                                                                  |
| 832 | Q13283           | 9                    | 47             | 25.5                  | 466    | 52164 | 5.5  | Ras GTPase-activating protein-binding protein 1                                                                                                                                                                                                                                                                                                                                                         |
| 832 | Q6FI03           | 9                    | 47             | 25.5                  | 466    | 52164 | 5.6  | G3BP protein                                                                                                                                                                                                                                                                                                                                                                                            |
| 833 | Q542Y9           | 9                    | 22             | 24.9                  | 358    | 40500 | 6.2  | CDNA FLJ90819 fis, clone Y79AA1001264, highly similar to DnaJ homolog subfamily B member 11                                                                                                                                                                                                                                                                                                             |
| 833 | Q9UBS4           | 9                    | 22             | 24.9                  | 358    | 40514 | 6.2  | DnaJ homolog subfamily B member 11 precursor                                                                                                                                                                                                                                                                                                                                                            |
| 833 | Q6IAQ8           | 9                    | 22             | 24.9                  | 358    | 40542 | 6.2  | DNAJB11 protein                                                                                                                                                                                                                                                                                                                                                                                         |
| 834 | Q96CP5           | 9                    | 11             | 25                    | 480    | 53509 | 6.7  | PMPCB protein                                                                                                                                                                                                                                                                                                                                                                                           |
| 834 | O75439           | 9                    | 11             | 24.5                  | 489    | 54366 | 6.8  | Mitochondrial-processing peptidase subunit beta, mitochondrial precursor                                                                                                                                                                                                                                                                                                                                |
| 834 | UPI0000D61CA8    | 9                    | 11             | 24.4                  | 491    | 54524 | 6.8  | Mitochondrial-processing peptidase subunit beta, mitochondrial precursor (EC 3.4.24.64) (Beta-MPP) (P-52).                                                                                                                                                                                                                                                                                              |
| 835 | P11310           | 9                    | 11             | 24.2                  | 421    | 46588 | 8.4  | Medium-chain specific acyl-CoA dehydrogenase, mitochondrial precursor                                                                                                                                                                                                                                                                                                                                   |
| 835 | Q5T4U5           | 9                    | 11             | 22.5                  | 454    | 50271 | 7.8  | Acyl-Coenzyme A dehydrogenase, C-4 to C-12 straight chain                                                                                                                                                                                                                                                                                                                                               |
| 835 | Q5HYG7           | 9                    | 11             | 22.5                  | 454    | 50309 | 7.8  | Hypothetical protein DKFZp686M24262                                                                                                                                                                                                                                                                                                                                                                     |
| 836 | Q99816           | 9                    | 11             | 24.1                  | 390    | 43944 | 6.4  | Tumor susceptibility gene 101 protein                                                                                                                                                                                                                                                                                                                                                                   |
| 837 | Q9NZ37           | 9                    | 11             | 24.9                  | 397    | 45398 | 7.1  | Uncharacterized hypothalamus protein HT010                                                                                                                                                                                                                                                                                                                                                              |
| 837 | Q5QTQ4           | 9                    | 11             | 24                    | 413    | 47143 | 6.6  | MSTP012                                                                                                                                                                                                                                                                                                                                                                                                 |
| 837 | UPI0000D6127F    | 9                    | 11             | 24                    | 412    | 47015 | 6.4  | erythropoietin 4 immediate early response                                                                                                                                                                                                                                                                                                                                                               |
| 837 | Q9NUZ3           | 9                    | 11             | 23.2                  | 426    | 48631 | 5.4  | CDNA FLJ11039 fis, clone PLACE1004376                                                                                                                                                                                                                                                                                                                                                                   |
| 837 | Q8WU90           | 9                    | 11             | 23.2                  | 426    | 48603 | 5.3  | Zinc finger CCHH-type containing 15                                                                                                                                                                                                                                                                                                                                                                     |
| 838 | Q7L1Q6           | 9                    | 29             | 23.9                  | 419    | 48043 | 5.9  | Basic leucine zipper and W2 domain-containing protein 1                                                                                                                                                                                                                                                                                                                                                 |
| 838 | Q53FN7           | 9                    | 29             | 23.6                  | 424    | 48618 | 6.1  | BZW1 protein variant                                                                                                                                                                                                                                                                                                                                                                                    |
| 839 | Q10713           | 9                    | 17             | 23.4                  | 525    | 58253 | 6.9  | Mitochondrial-processing peptidase alpha subunit, mitochondrial precursor                                                                                                                                                                                                                                                                                                                               |
| 840 | Q0VGU9           | 9                    | 51             | 32.2                  | 367    | 39818 | 6.6  | Rbm39 protein                                                                                                                                                                                                                                                                                                                                                                                           |
| 840 | A2RRD3           | 9                    | 51             | 23.2                  | 508    | 57090 | 10   | RBM39 protein                                                                                                                                                                                                                                                                                                                                                                                           |
| 840 | Q68DD9           | 9                    | 51             | 23                    | 513    | 57444 | 10.3 | Hypothetical protein DKFZp781C0423                                                                                                                                                                                                                                                                                                                                                                      |
| 840 | Q5RC80           | 9                    | 51             | 22.5                  | 524    | 58657 | 10.1 | RNA-binding protein 39                                                                                                                                                                                                                                                                                                                                                                                  |
| 840 | Q14498           | 9                    | 51             | 22.3                  | 530    | 59380 | 10.1 | RNA-binding protein 39                                                                                                                                                                                                                                                                                                                                                                                  |
| 841 | UPI0000D61BB9    | 9                    | 25             | 23.3                  | 433    | 49390 | 9.5  | AP-2 complex subunit mu-1 (Adaptin mu-1) (AP-2 mu-2 chain) (Clathrin coat assembly protein AP50) (Clathrin coat-associated protein AP50) (Plasma membrane adaptor AP-2 50 kDa protein) (HA2 50 kDa subunit) (Clathrin assembly protein complex 2 medium chain).                                                                                                                                         |
| 841 | Q96CW1           | 9                    | 25             | 23.2                  | 435    | 49655 | 9.5  | AP-2 complex subunit mu-1                                                                                                                                                                                                                                                                                                                                                                               |
| 841 | UPI00004571AB    | 9                    | 25             | 23.2                  | 435    | 49656 | 9.5  | AP-2 complex subunit mu-1 (Adaptin mu-1) (AP-2 mu-2 chain) (Clathrin coat assembly protein AP50) (Clathrin coat-associated protein AP50) (Plasma membrane adaptor AP-2 50 kDa protein) (HA2 50 kDa subunit) (Clathrin assembly protein complex 2 medium chain).                                                                                                                                         |
| 842 | P04062           | 9                    | 19             | 22.9                  | 536    | 59716 | 7.6  | Glucosylceramidase precursor                                                                                                                                                                                                                                                                                                                                                                            |
| 843 | Q9H223           | 9                    | 16             | 22.7                  | 541    | 61175 | 6.8  | EH domain-containing protein 4                                                                                                                                                                                                                                                                                                                                                                          |
| 844 | Q9UNH7           | 9                    | 11             | 22.7                  | 406    | 46649 | 6.2  | Sorting nexin-6                                                                                                                                                                                                                                                                                                                                                                                         |
| 845 | Q12874           | 9                    | 14             | 22.4                  | 501    | 58849 | 5.4  | Splicing factor 3A subunit 3                                                                                                                                                                                                                                                                                                                                                                            |
| 845 | Q53HM6           | 9                    | 14             | 22.4                  | 501    | 58877 | 5.4  | Splicing factor 3a, subunit 3 variant                                                                                                                                                                                                                                                                                                                                                                   |
| 846 | Q15813           | 9                    | 10             | 22.4                  | 527    | 59346 | 6.8  | Tubulin-specific chaperone E                                                                                                                                                                                                                                                                                                                                                                            |
| 847 | Q9Y285           | 9                    | 24             | 22.4                  | 508    | 57564 | 7.8  | Phenylalanyl-tRNA synthetase alpha chain                                                                                                                                                                                                                                                                                                                                                                |
| 848 | Q9HBZ9           | 9                    | 12             | 21.5                  | 478    | 54020 | 6.3  | RNA helicase                                                                                                                                                                                                                                                                                                                                                                                            |
| 848 | Q9NUU7           | 9                    | 12             | 21.5                  | 478    | 53975 | 6.6  | ATP-dependent RNA helicase DDX19A                                                                                                                                                                                                                                                                                                                                                                       |
| 849 | Q6UW63           | 9                    | 13             | 21.1                  | 502    | 58043 | 7.7  | KDEL motif-containing protein 1 precursor                                                                                                                                                                                                                                                                                                                                                               |
| 849 | UPI000006ED28    | 9                    | 13             | 21.1                  | 502    | 58029 | 7.7  | KDEL (Lys-Asp-Glu-Leu) containing 1                                                                                                                                                                                                                                                                                                                                                                     |
| 850 | Q9UMS4           | 9                    | 16             | 20.8                  | 504    | 55181 | 6.6  | Pre-mRNA-processing factor 19                                                                                                                                                                                                                                                                                                                                                                           |
| 851 | Q9NZW5           | 9                    | 14             | 20.7                  | 540    | 61117 | 6.2  | MAGUK p55 subfamily member 6                                                                                                                                                                                                                                                                                                                                                                            |
| 852 | P10155           | 9                    | 21             | 20.4                  | 538    | 60671 | 8    | 60 kDa SS-A/Ro ribonucleoprotein                                                                                                                                                                                                                                                                                                                                                                        |
| 853 | Q9UBT2           | 9                    | 17             | 19.7                  | 640    | 71224 | 5.3  | SUMO-activating enzyme subunit 2                                                                                                                                                                                                                                                                                                                                                                        |
| 854 | O60684           | 9                    | 16             | 19.6                  | 536    | 60030 | 5    | Importin alpha-7 subunit                                                                                                                                                                                                                                                                                                                                                                                |
| 854 | UPI0000D61EBB    | 9                    | 16             | 19.5                  | 539    | 60342 | 5    | Importin alpha-7 subunit (Karyopherin alpha-6).                                                                                                                                                                                                                                                                                                                                                         |
| 855 | Q5JW30           | 9                    | 15             | 22.9                  | 494    | 54709 | 9.5  | Staufen, RNA binding protein, homolog 1                                                                                                                                                                                                                                                                                                                                                                 |
| 855 | O95793-2         | 9                    | 15             | 22.8                  | 496    | 54934 | 9.5  | Isoform Short of O95793                                                                                                                                                                                                                                                                                                                                                                                 |
| 855 | Q5JW29           | 9                    | 15             | 22.5                  | 502    | 55635 | 9.5  | Staufen, RNA binding protein, homolog 1                                                                                                                                                                                                                                                                                                                                                                 |
| 855 | O95793           | 9                    | 15             | 19.6                  | 577    | 63182 | 9.4  | Double-stranded RNA-binding protein Staufen homolog 1                                                                                                                                                                                                                                                                                                                                                   |
| 856 | P53634           | 9                    | 22             | 19.2                  | 463    | 51842 | 7    | Dipeptidyl-peptidase 1 precursor (EC 3.4.14.1) (Dipeptidyl-peptidase I) (DPP-I) (DPPI) (Cathepsin C) (Cathepsin J) (Dipeptidyl transferase) [Contains: Dipeptidyl-peptidase 1 exclusion domain chain (Dipeptidyl-peptidase I exclusion domain chain); Dipeptidyl-peptidase 1 heavy chain (Dipeptidyl-peptidase I heavy chain); Dipeptidyl-peptidase 1 light chain (Dipeptidyl-peptidase I light chain)] |

| No. | Accession Number | Unique Peptide Count | Spectrum Count | Sequence Coverage (%) | Length | MolWt  | pI  | Descriptive Name                                                                                                                                                                                                                                               |
|-----|------------------|----------------------|----------------|-----------------------|--------|--------|-----|----------------------------------------------------------------------------------------------------------------------------------------------------------------------------------------------------------------------------------------------------------------|
| 856 | UPI000006D22D    | 9                    | 22             | 19.2                  | 463    | 51854  | 7   | Dipeptidyl-peptidase 1 precursor (EC 3.4.14.1) (Dipeptidyl-peptidase I) (DPP-I) (DPPI) (Cathepsin C) (Cathepsin J) (Dipeptidyl transferase) [Contains: Dipeptidyl-peptidase 1 exclusion domain chain (Dipeptidyl-peptidase I exclusion domain chain); Dipeptid |
| 856 | Q8WY99           | 9                    | 22             | 19.2                  | 463    | 51902  | 7   | Cathepsin C                                                                                                                                                                                                                                                    |
| 856 | Q71E76           | 9                    | 22             | 19.2                  | 463    | 51816  | 7   | Cathepsin C                                                                                                                                                                                                                                                    |
| 857 | O00116           | 9                    | 21             | 18.7                  | 658    | 72912  | 7.3 | Alkyldihydroxyacetonephosphate synthase, peroxisomal precursor                                                                                                                                                                                                 |
| 858 | Q15637-4         | 9                    | 13             | 21.7                  | 548    | 59712  | 9.5 | Isoform 4 of Q15637                                                                                                                                                                                                                                            |
| 858 | Q15637-6         | 9                    | 13             | 20.8                  | 571    | 61889  | 9.3 | Isoform 6 of Q15637                                                                                                                                                                                                                                            |
| 858 | UPI0000456506    | 9                    | 13             | 19.1                  | 624    | 67309  | 9   | Splicing factor 1 (Zinc finger protein 162) (Transcription factor ZFM1) (Zinc finger gene in MEN1 locus) (Mammalian branch point-binding protein mBBP) (BBP).                                                                                                  |
| 858 | Q15637-3         | 9                    | 13             | 19.1                  | 623    | 67277  | 9.2 | Isoform 3 of Q15637                                                                                                                                                                                                                                            |
| 858 | Q15637-2         | 9                    | 13             | 18.7                  | 638    | 68633  | 9.2 | Isoform 2 of Q15637                                                                                                                                                                                                                                            |
| 858 | Q15637           | 9                    | 13             | 18.6                  | 639    | 68330  | 9   | Splicing factor 1                                                                                                                                                                                                                                              |
| 858 | UPI0000D6262C    | 9                    | 13             | 15.6                  | 764    | 80370  | 9.2 | Splicing factor 1 (Zinc finger protein 162) (Transcription factor ZFM1) (Zinc finger gene in MEN1 locus) (Mammalian branch point-binding protein mBBP) (BBP).                                                                                                  |
| 858 | Q15637-5         | 9                    | 13             | 15.6                  | 764    | 80621  | 9.5 | Isoform 5 of Q15637                                                                                                                                                                                                                                            |
| 859 | O95831-3         | 9                    | 16             | 18.4                  | 609    | 66295  | 8.9 | Isoform 3 of O95831                                                                                                                                                                                                                                            |
| 859 | O95831           | 9                    | 16             | 18.3                  | 613    | 66901  | 9   | Apoptosis-inducing factor 1, mitochondrial precursor                                                                                                                                                                                                           |
| 860 | O00541-2         | 9                    | 20             | 17.2                  | 583    | 67456  | 7.5 | Isoform 2 of O00541                                                                                                                                                                                                                                            |
| 860 | O00541           | 9                    | 20             | 17                    | 588    | 68003  | 7.3 | Pescadillo homolog 1                                                                                                                                                                                                                                           |
| 861 | P48147           | 9                    | 19             | 17                    | 710    | 80764  | 5.8 | Prolyl endopeptidase                                                                                                                                                                                                                                           |
| 861 | Q9UM02           | 9                    | 19             | 17                    | 710    | 80734  | 5.9 | Prolyl endopeptidase                                                                                                                                                                                                                                           |
| 861 | Q8N6D4           | 9                    | 19             | 17                    | 710    | 80700  | 5.9 | Prolyl endopeptidase                                                                                                                                                                                                                                           |
| 862 | Q2PZ11           | 9                    | 45             | 16.3                  | 675    | 77319  | 9   | Dpy-19-like protein 1                                                                                                                                                                                                                                          |
| 862 | UPI0000DD7E92    | 9                    | 45             | 16.3                  | 675    | 77361  | 9   | PREDICTED: similar to dpy-19-like 1, like                                                                                                                                                                                                                      |
| 863 | P07196           | 9                    | 21             | 16.2                  | 543    | 61517  | 4.6 | Neurofilament light polypeptide                                                                                                                                                                                                                                |
| 863 | UPI0000246DBD    | 9                    | 21             | 16.2                  | 542    | 61430  | 4.6 | Neurofilament triplet L protein (68 kDa neurofilament protein) (Neurofilament light polypeptide) (NF-L).                                                                                                                                                       |
| 864 | Q86VS8           | 9                    | 10             | 15.6                  | 718    | 83126  | 5.2 | Hook homolog 3                                                                                                                                                                                                                                                 |
| 865 | Q6PI48           | 9                    | 12             | 15.5                  | 645    | 73563  | 8   | Aspartyl-tRNA synthetase, mitochondrial precursor                                                                                                                                                                                                              |
| 866 | Q6AWC9           | 9                    | 9              | 13.8                  | 879    | 99245  | 6.5 | Hypothetical protein DKFZp686J1643                                                                                                                                                                                                                             |
| 867 | Q09161           | 9                    | 20             | 13.7                  | 790    | 91839  | 6.4 | Nuclear cap-binding protein subunit 1                                                                                                                                                                                                                          |
| 868 | Q9UGP8           | 9                    | 30             | 13.3                  | 760    | 87997  | 5.3 | Translocation protein SEC63 homolog                                                                                                                                                                                                                            |
| 869 | Q8IXB1           | 9                    | 21             | 12.5                  | 793    | 91080  | 7.2 | DnaJ homolog subfamily C member 10 precursor                                                                                                                                                                                                                   |
| 870 | Q2TTR2           | 9                    | 20             | 12.4                  | 928    | 103136 | 4.8 | Cell growth inhibiting protein 39                                                                                                                                                                                                                              |
| 870 | Q9BZQ8           | 9                    | 20             | 12.4                  | 928    | 103135 | 4.8 | Niban protein                                                                                                                                                                                                                                                  |
| 871 | UPI000059D172    | 9                    | 16             | 12.7                  | 1042   | 111985 | 6.4 | Protein transport protein Sec24C (SEC24-related protein C).                                                                                                                                                                                                    |
| 871 | P53992           | 9                    | 16             | 12.1                  | 1094   | 118315 | 7.1 | Protein transport protein Sec24C                                                                                                                                                                                                                               |
| 871 | UPI000013F621    | 9                    | 16             | 12.1                  | 1094   | 118325 | 7.1 | SEC24-related protein C                                                                                                                                                                                                                                        |
| 872 | Q5TG62           | 9                    | 26             | 12                    | 971    | 109421 | 7.9 | KIAA0090                                                                                                                                                                                                                                                       |
| 872 | Q8N766-2         | 9                    | 26             | 11.8                  | 992    | 111631 | 7.7 | Isoform 2 of Q8N766                                                                                                                                                                                                                                            |
| 872 | Q8N766           | 9                    | 26             | 11.8                  | 993    | 111759 | 7.7 | Uncharacterized protein KIAA0090 precursor                                                                                                                                                                                                                     |
| 873 | Q96P70           | 9                    | 39             | 11.8                  | 1041   | 115963 | 4.8 | Importin-9                                                                                                                                                                                                                                                     |
| 874 | P12110           | 9                    | 9              | 11.4                  | 1019   | 108579 | 6.2 | Collagen alpha-2(VI) chain precursor                                                                                                                                                                                                                           |
| 875 | Q2VPA0           | 9                    | 20             | 12.9                  | 848    | 95097  | 6.7 | PRSS15 protein                                                                                                                                                                                                                                                 |
| 875 | Q8N8K8           | 9                    | 20             | 12.2                  | 895    | 100397 | 6.7 | CDNA FLJ39307 fis, clone OCBBF2013208, highly similar to MITOCHONDRIAL LON PROTEASE                                                                                                                                                                            |
| 875 | P36776           | 9                    | 20             | 11.4                  | 959    | 106489 | 6.4 | Lon protease homolog, mitochondrial precursor                                                                                                                                                                                                                  |
| 876 | Q9NZB2           | 9                    | 12             | 11.3                  | 1069   | 116701 | 9   | UPF0318 protein FAM120A                                                                                                                                                                                                                                        |
| 876 | UPI000013D2D9    | 9                    | 12             | 11.3                  | 1068   | 116588 | 9   | UPF0318 protein FAM120A.                                                                                                                                                                                                                                       |
| 876 | Q9NZB2-3         | 9                    | 12             | 10.8                  | 1118   | 121888 | 8.9 | Isoform C of Q9NZB2                                                                                                                                                                                                                                            |
| 877 | P42285           | 9                    | 27             | 11.1                  | 1042   | 117805 | 6.5 | Superkiller viralicidic activity 2-like 2                                                                                                                                                                                                                      |
| 878 | O95486           | 9                    | 21             | 10.5                  | 1078   | 118792 | 8.1 | Protein transport protein Sec24A                                                                                                                                                                                                                               |
| 878 | UPI0000457346    | 9                    | 21             | 10.5                  | 1077   | 118677 | 8.2 | Protein transport protein Sec24A (SEC24-related protein A)                                                                                                                                                                                                     |
| 878 | UPI0000185FF9    | 9                    | 21             | 10.3                  | 1093   | 119749 | 7.7 | SEC24 related gene family, member A                                                                                                                                                                                                                            |
| 879 | UPI0000E9B14C    | 9                    | 13             | 10.5                  | 1001   | 118103 | 6.8 | RNA binding motif protein 12B                                                                                                                                                                                                                                  |
| 880 | Q8WWM7           | 9                    | 16             | 9.8                   | 1075   | 113374 | 8.6 | Ataxin-2-like protein                                                                                                                                                                                                                                          |
| 881 | Q9P0K7-3         | 9                    | 13             | 9.8                   | 972    | 109080 | 6   | Isoform 3 of Q9P0K7                                                                                                                                                                                                                                            |
| 881 | Q9P0K7           | 9                    | 13             | 9.7                   | 980    | 110041 | 6.2 | Ankycorbis                                                                                                                                                                                                                                                     |
| 881 | UPI0000074005    | 9                    | 13             | 9.7                   | 980    | 110042 | 6.2 | retinoic acid induced 14                                                                                                                                                                                                                                       |
| 881 | Q9P0K7-2         | 9                    | 13             | 9.7                   | 983    | 110423 | 6.1 | Isoform 2 of Q9P0K7                                                                                                                                                                                                                                            |
| 882 | P23634-5         | 9                    | 54             | 10.6                  | 1122   | 124007 | 7.3 | Isoform ZK of P23634                                                                                                                                                                                                                                           |
| 882 | P23634-4         | 9                    | 54             | 10.5                  | 1134   | 125344 | 7.7 | Isoform XK of P23634                                                                                                                                                                                                                                           |
| 882 | P23634-3         | 9                    | 54             | 10.3                  | 1158   | 128066 | 7.1 | Isoform ZA of P23634                                                                                                                                                                                                                                           |
| 882 | Q5T0B3           | 9                    | 54             | 10.2                  | 1170   | 129403 | 7.5 | Cation-transporting ATPase                                                                                                                                                                                                                                     |
| 882 | P23634-7         | 9                    | 54             | 10                    | 1193   | 132594 | 6.2 | Isoform ZB of P23634                                                                                                                                                                                                                                           |
| 882 | Q7Z3S1           | 9                    | 54             | 9.9                   | 1205   | 133874 | 6.5 | Cation-transporting ATPase                                                                                                                                                                                                                                     |
| 882 | Q5T0B2           | 9                    | 54             | 9.9                   | 1205   | 133930 | 6.4 | Cation-transporting ATPase                                                                                                                                                                                                                                     |
| 882 | P23634-8         | 9                    | 54             | 9.7                   | 1229   | 136583 | 6.4 | Isoform ZD of P23634                                                                                                                                                                                                                                           |

| No. | Accession Number | Unique Peptide Count | Spectrum Count | Sequence Coverage (%) | Length | MolWt  | pI  | Descriptive Name                                                                                                                                                            |
|-----|------------------|----------------------|----------------|-----------------------|--------|--------|-----|-----------------------------------------------------------------------------------------------------------------------------------------------------------------------------|
| 882 | P23634           | 9                    | 54             | 9.6                   | 1241   | 137920 | 6.6 | Plasma membrane calcium-transporting ATPase 4                                                                                                                               |
| 883 | UPI000052D444    | 9                    | 20             | 9.6                   | 1032   | 114899 | 6.5 | integrin alpha 4 precursor                                                                                                                                                  |
| 883 | P13612           | 9                    | 20             | 9.5                   | 1038   | 115333 | 6.4 | Integrin alpha-4 precursor                                                                                                                                                  |
| 883 | UPI0000456EB4    | 9                    | 20             | 9.5                   | 1037   | 115304 | 6.3 | Integrin alpha-4 precursor (Integrin alpha-IV) (VLA-4) (CD49d antigen).                                                                                                     |
| 884 | UPI0000D61AE5    | 9                    | 35             | 9.5                   | 1017   | 114060 | 6.8 | Sodium bicarbonate cotransporter 3 (Sodium bicarbonate cotransporter 2) (Sodium bicarbonate cotransporter 2b) (Bicarbonate transporter) (Solute carrier family 4 member 7). |
| 885 | Q7L014           | 9                    | 19             | 9.3                   | 1031   | 117362 | 9.3 | Probable ATP-dependent RNA helicase DDX46                                                                                                                                   |
| 885 | UPI0000457348    | 9                    | 19             | 9.3                   | 1032   | 117462 | 9.3 | Probable ATP-dependent RNA helicase DDX46 (EC 3.6.1.-) (DEAD box protein 46) (PRP5 homolog).                                                                                |
| 885 | UPI0000457347    | 9                    | 19             | 9.3                   | 1033   | 117575 | 9.3 | Probable ATP-dependent RNA helicase DDX46 (EC 3.6.1.-) (DEAD box protein 46) (PRP5 homolog).                                                                                |
| 886 | Q12965           | 9                    | 21             | 9.1                   | 1109   | 127041 | 8.9 | Myosin-le                                                                                                                                                                   |
| 886 | Q4KMR3           | 9                    | 21             | 9.1                   | 1108   | 127062 | 8.9 | Myosin IE                                                                                                                                                                   |
| 887 | O00203           | 9                    | 14             | 9                     | 1094   | 121350 | 6   | AP-3 complex subunit beta-1                                                                                                                                                 |
| 887 | UPI00001AE77D    | 9                    | 14             | 9                     | 1094   | 121320 | 6   | adaptor-related protein complex 3, beta 1 subunit                                                                                                                           |
| 888 | Q9HD20-2         | 9                    | 22             | 9.9                   | 1086   | 121110 | 7.8 | Isoform B of Q9HD20                                                                                                                                                         |
| 888 | Q9HD20           | 9                    | 22             | 8.9                   | 1204   | 132955 | 8.1 | Probable cation-transporting ATPase 13A1                                                                                                                                    |
| 889 | Q9NTI5           | 9                    | 16             | 8.8                   | 1447   | 164666 | 8.5 | Hypothetical protein                                                                                                                                                        |
| 889 | UPI0000D61A5E    | 9                    | 16             | 8.8                   | 1449   | 164824 | 8.5 | androgen-induced prostate proliferative shutoff associated protein                                                                                                          |
| 889 | Q9Y2I5           | 9                    | 16             | 8.6                   | 1483   | 168415 | 8.6 | Androgen-induced proliferation inhibitor                                                                                                                                    |
| 890 | Q59EA1           | 9                    | 15             | 8.9                   | 1081   | 122130 | 8.6 | Transcription elongation regulator 1 variant                                                                                                                                |
| 890 | O14776           | 9                    | 15             | 8.7                   | 1098   | 123960 | 8.7 | Transcription elongation regulator 1                                                                                                                                        |
| 890 | UPI000013E374    | 9                    | 15             | 8.7                   | 1098   | 123901 | 8.6 | transcription elongation regulator 1 isoform 1                                                                                                                              |
| 891 | Q5TBK6           | 9                    | 21             | 8.4                   | 1349   | 153670 | 7.8 | LIM domain 7                                                                                                                                                                |
| 891 | Q8WWI1-3         | 9                    | 21             | 8.4                   | 1349   | 153684 | 7.8 | Isoform 3 of Q8WWI1                                                                                                                                                         |
| 891 | UPI0000456709    | 9                    | 21             | 7                     | 1614   | 185153 | 8   | LIM domain only protein 7 (LOMP) (F-box only protein 20).                                                                                                                   |
| 891 | Q8WWI1-4         | 9                    | 21             | 7                     | 1614   | 185229 | 8   | Isoform 4 of Q8WWI1                                                                                                                                                         |
| 891 | UPI0000456708    | 9                    | 21             | 6.8                   | 1670   | 190813 | 7   | LIM domain only protein 7 (LOMP) (F-box only protein 20).                                                                                                                   |
| 891 | Q8WWI1-2         | 9                    | 21             | 6.8                   | 1670   | 190889 | 7   | Isoform 2 of Q8WWI1                                                                                                                                                         |
| 891 | UPI0000456707    | 9                    | 21             | 6.7                   | 1683   | 192754 | 8.1 | LIM domain only protein 7 (LOMP) (F-box only protein 20).                                                                                                                   |
| 891 | Q8WWI1           | 9                    | 21             | 6.7                   | 1683   | 192708 | 8.1 | LIM domain only protein 7                                                                                                                                                   |
| 892 | O75153           | 9                    | 19             | 8                     | 1309   | 146669 | 6.1 | Putative eukaryotic translation initiation factor 3 subunit                                                                                                                 |
| 892 | UPI0000D622A0    | 9                    | 19             | 8                     | 1310   | 146826 | 6.2 | Putative eukaryotic translation initiation factor 3 subunit (eIF-3).                                                                                                        |
| 893 | Q9BZF9           | 9                    | 16             | 7.1                   | 1416   | 162504 | 7   | Uveal autoantigen with coiled-coil domains and ankyrin repeats                                                                                                              |
| 894 | Q5D044           | 9                    | 50             | 6.4                   | 1816   | 201882 | 6.3 | LAMA4 protein                                                                                                                                                               |
| 895 | Q149P0           | 9                    | 15             | 5.8                   | 1855   | 206015 | 5.8 | GBF1 protein                                                                                                                                                                |
| 895 | Q92538           | 9                    | 15             | 5.8                   | 1859   | 206444 | 5.7 | Golgi-specific brefeldin A-resistance guanine nucleotide exchange factor 1                                                                                                  |
| 896 | Q9Y5S2           | 9                    | 11             | 5.8                   | 1711   | 194314 | 6.4 | Serine/threonine-protein kinase MRCK beta                                                                                                                                   |
| 897 | UPI0000D61343    | 9                    | 23             | 5.5                   | 1828   | 212180 | 8.6 | Myosin-5A (Myosin Va) (Dilute myosin heavy chain, non-muscle) (Myosin heavy chain 12) (Myoxin).                                                                             |
| 897 | Q9Y4I1-2         | 9                    | 23             | 5.5                   | 1828   | 212287 | 8.6 | Isoform 2 of Q9Y4I1                                                                                                                                                         |
| 897 | Q9Y4I1           | 9                    | 23             | 5.4                   | 1855   | 215419 | 8.5 | Myosin-Va                                                                                                                                                                   |
| 897 | UPI0000E445E1    | 9                    | 23             | 5.4                   | 1855   | 215403 | 8.5 | myosin VA (heavy polypeptide 12, myoxin)                                                                                                                                    |
| 897 | UPI0000D61342    | 9                    | 23             | 5.4                   | 1855   | 215312 | 8.5 | Myosin-5A (Myosin Va) (Dilute myosin heavy chain, non-muscle) (Myosin heavy chain 12) (Myoxin).                                                                             |
| 897 | UPI0000D61341    | 9                    | 23             | 5.3                   | 1880   | 218515 | 8.5 | Myosin-5A (Myosin Va) (Dilute myosin heavy chain, non-muscle) (Myosin heavy chain 12) (Myoxin).                                                                             |
| 898 | UPI0000DD79CB    | 9                    | 18             | 5.3                   | 1808   | 203142 | 4.8 | PREDICTED: similar to melanoma inhibitory activity 3 isoform 14                                                                                                             |
| 898 | UPI0000DD7931    | 9                    | 18             | 5.3                   | 1808   | 203141 | 4.8 | PREDICTED: similar to melanoma inhibitory activity 3 isoform 3                                                                                                              |
| 898 | UPI00006C03F1    | 9                    | 18             | 5.2                   | 1848   | 206889 | 4.8 | PREDICTED: similar to melanoma inhibitory activity 3 isoform 23                                                                                                             |
| 898 | Q5JRA6           | 9                    | 18             | 5                     | 1907   | 213700 | 4.8 | Melanoma inhibitory activity family member 3                                                                                                                                |
| 898 | UPI0000D620B3    | 9                    | 18             | 5                     | 1907   | 213686 | 4.8 | melanoma inhibitory activity family, member 3                                                                                                                               |
| 898 | UPI00006C03EC    | 9                    | 18             | 5                     | 1907   | 213701 | 4.8 | PREDICTED: similar to melanoma inhibitory activity 3 isoform 1                                                                                                              |
| 899 | UPI0000D62536    | 9                    | 19             | 5.4                   | 2142   | 232541 | 6   | SON protein (SON3) (Negative regulatory element-binding protein) (NRE- binding protein) (DBP-5) (Bax antagonist selected in saccharomyces 1) (BASS1).                       |
| 899 | P18583-2         | 9                    | 19             | 5.4                   | 2140   | 232322 | 6   | Isoform A of P18583                                                                                                                                                         |
| 899 | UPI0000D62537    | 9                    | 19             | 4.8                   | 2388   | 259821 | 5.7 | SON protein (SON3) (Negative regulatory element-binding protein) (NRE- binding protein) (DBP-5) (Bax antagonist selected in saccharomyces 1) (BASS1).                       |
| 899 | P18583-7         | 9                    | 19             | 4.8                   | 2386   | 259608 | 5.7 | Isoform G of P18583                                                                                                                                                         |
| 899 | P18583           | 9                    | 19             | 4.7                   | 2426   | 263843 | 5.6 | SON protein                                                                                                                                                                 |
| 899 | UPI0000140BFD    | 9                    | 19             | 4.7                   | 2426   | 263827 | 5.6 | SON DNA-binding protein isoform F                                                                                                                                           |
| 899 | P18583-9         | 9                    | 19             | 4.7                   | 2466   | 268106 | 5.6 | Isoform I of P18583                                                                                                                                                         |

| No. | Accession Number | Unique Peptide Count | Spectrum Count | Sequence Coverage (%) | Length | MolWt  | pI   | Descriptive Name                                                                                                                                                                                    |
|-----|------------------|----------------------|----------------|-----------------------|--------|--------|------|-----------------------------------------------------------------------------------------------------------------------------------------------------------------------------------------------------|
| 899 | P18583-5         | 9                    | 19             | 4.7                   | 2459   | 267048 | 5.7  | Isoform D of P18583                                                                                                                                                                                 |
| 900 | O75165           | 9                    | 44             | 4.5                   | 2243   | 254417 | 6.7  | DnaJ homolog subfamily C member 13                                                                                                                                                                  |
| 900 | Q3L0T1           | 9                    | 44             | 4.5                   | 2243   | 254412 | 6.7  | DnaJ domain-containing protein RME-8                                                                                                                                                                |
| 901 | P05387           | 8                    | 50             | 77.4                  | 115    | 11665  | 4.5  | 60S acidic ribosomal protein P2                                                                                                                                                                     |
| 902 | P49773           | 8                    | 24             | 75.4                  | 126    | 13802  | 7    | Histidine triad nucleotide-binding protein 1                                                                                                                                                        |
| 903 | O75368           | 8                    | 26             | 71.9                  | 114    | 12774  | 5.2  | SH3 domain-binding glutamic acid-rich-like protein                                                                                                                                                  |
| 904 | O75531           | 8                    | 51             | 65.2                  | 89     | 10059  | 6.1  | Barrier-to-autointegration factor                                                                                                                                                                   |
| 905 | Q9BVJ7           | 8                    | 9              | 61.3                  | 150    | 16588  | 8.2  | Dual specificity protein phosphatase 23                                                                                                                                                             |
| 906 | P09382           | 8                    | 202            | 58.5                  | 135    | 14716  | 5.5  | Galectin-1                                                                                                                                                                                          |
| 907 | P08708           | 8                    | 84             | 57                    | 135    | 15550  | 9.8  | 40S ribosomal protein S17                                                                                                                                                                           |
| 908 | Q96TD5           | 8                    | 29             | 57.2                  | 243    | 26349  | 4.7  | P27BBP protein                                                                                                                                                                                      |
| 908 | P56537           | 8                    | 29             | 56.7                  | 245    | 26599  | 4.7  | Eukaryotic translation initiation factor 6 (eIF-6) (B4 integrin interactor) (CAB) (p27(BBP)) (B(2)GCN homolog)                                                                                      |
| 909 | P61981           | 8                    | 107            | 56.3                  | 247    | 28303  | 4.9  | 14-3-3 protein gamma                                                                                                                                                                                |
| 910 | P15374           | 8                    | 34             | 54.8                  | 230    | 26183  | 4.9  | Ubiquitin carboxyl-terminal hydrolase isozyme L3                                                                                                                                                    |
| 911 | Q9NYG7           | 8                    | 87             | 58.7                  | 179    | 19718  | 5.4  | Bax-sigma                                                                                                                                                                                           |
| 911 | Q07812           | 8                    | 87             | 54.7                  | 192    | 21184  | 5.2  | Apoptosis regulator BAX, membrane isoform alpha                                                                                                                                                     |
| 911 | Q07814           | 8                    | 87             | 48.2                  | 218    | 24220  | 7.9  | Apoptosis regulator BAX, cytoplasmic isoform beta                                                                                                                                                   |
| 912 | P62820           | 8                    | 85             | 54.6                  | 205    | 22678  | 6.2  | Ras-related protein Rab-1A                                                                                                                                                                          |
| 913 | P63241           | 8                    | 63             | 53.2                  | 154    | 16832  | 5.2  | Eukaryotic translation initiation factor 5A-1                                                                                                                                                       |
| 913 | P63241-2         | 8                    | 63             | 44.6                  | 184    | 20170  | 7    | Isoform 2 of P63241                                                                                                                                                                                 |
| 914 | Q16774           | 8                    | 22             | 52.8                  | 197    | 21726  | 6.5  | Guanylate kinase                                                                                                                                                                                    |
| 914 | Q5T435           | 8                    | 22             | 47.9                  | 217    | 23711  | 7.5  | Guanylate kinase 1                                                                                                                                                                                  |
| 914 | Q5T433           | 8                    | 22             | 41.1                  | 253    | 27578  | 5.6  | Guanylate kinase 1                                                                                                                                                                                  |
| 915 | P19105           | 8                    | 62             | 50.9                  | 171    | 19794  | 4.8  | Myosin regulatory light chain 2, nonsarcomeric                                                                                                                                                      |
| 915 | Q3THE2           | 8                    | 62             | 50.6                  | 172    | 19779  | 4.8  | Myosin regulatory light chain 2-B, smooth muscle isoform                                                                                                                                            |
| 916 | P48047           | 8                    | 50             | 49.3                  | 213    | 23277  | 10   | ATP synthase O subunit, mitochondrial precursor                                                                                                                                                     |
| 917 | Q13405           | 8                    | 13             | 48.2                  | 166    | 19198  | 9.5  | Mitochondrial 39S ribosomal protein L49                                                                                                                                                             |
| 918 | O75340           | 8                    | 28             | 47.1                  | 191    | 21868  | 5.4  | Programmed cell death protein 6                                                                                                                                                                     |
| 919 | P25789           | 8                    | 28             | 46.7                  | 261    | 29484  | 7.7  | Proteasome subunit alpha type 4                                                                                                                                                                     |
| 920 | Q86S22           | 8                    | 11             | 46.2                  | 158    | 17983  | 8.7  | Trafficking protein particle complex subunit 6B                                                                                                                                                     |
| 921 | P20618           | 8                    | 40             | 46.1                  | 241    | 26489  | 8.1  | Proteasome subunit beta type 1 precursor                                                                                                                                                            |
| 921 | Q53FT8           | 8                    | 40             | 46.1                  | 241    | 26491  | 8.1  | Proteasome beta 1 subunit variant                                                                                                                                                                   |
| 922 | P52943           | 8                    | 14             | 45.2                  | 208    | 22493  | 8.7  | Cysteine-rich protein 2                                                                                                                                                                             |
| 922 | Q53FN1           | 8                    | 14             | 45.2                  | 208    | 22494  | 8.5  | Cysteine-rich protein 2 variant                                                                                                                                                                     |
| 923 | Q16836           | 8                    | 10             | 44.9                  | 314    | 34278  | 8.9  | Hydroxyacyl-coenzyme A dehydrogenase, mitochondrial precursor                                                                                                                                       |
| 923 | UPI000013EECF    | 8                    | 10             | 44.9                  | 314    | 34294  | 8.9  | L-3-hydroxyacyl-Coenzyme A dehydrogenase precursor                                                                                                                                                  |
| 923 | UPI000013D5C7    | 8                    | 10             | 36.2                  | 390    | 42123  | 9.3  | Hydroxyacyl-coenzyme A dehydrogenase, mitochondrial precursor (EC 1.1.1.35) (Short chain 3-hydroxyacyl-CoA dehydrogenase) (HCDH) (Medium and short chain L-3-hydroxyacyl-coenzyme A dehydrogenase). |
| 923 | Q16836-2         | 8                    | 10             | 36.2                  | 390    | 42123  | 9.3  | Isoform 2 of Q16836                                                                                                                                                                                 |
| 924 | P07951-2         | 8                    | 37             | 44.7                  | 284    | 32990  | 4.7  | Isoform 2 of P07951                                                                                                                                                                                 |
| 925 | P00568           | 8                    | 32             | 44.3                  | 194    | 21635  | 8.6  | Adenylate kinase isoenzyme 1                                                                                                                                                                        |
| 925 | Q53EY8           | 8                    | 32             | 44.3                  | 194    | 21619  | 8.9  | Adenylate kinase 1 variant                                                                                                                                                                          |
| 925 | Q5T9B7           | 8                    | 32             | 41                    | 210    | 23411  | 8.6  | Adenylate kinase 1                                                                                                                                                                                  |
| 926 | P04632           | 8                    | 49             | 44                    | 268    | 28316  | 5.2  | Calpain small subunit 1                                                                                                                                                                             |
| 927 | Q02543           | 8                    | 73             | 43.8                  | 176    | 20762  | 10.7 | 60S ribosomal protein L18a                                                                                                                                                                          |
| 928 | P61586           | 8                    | 41             | 43.5                  | 193    | 21768  | 6.1  | Transforming protein RhoA precursor                                                                                                                                                                 |
| 929 | Q5VYC2           | 8                    | 33             | 43.6                  | 227    | 24636  | 7.2  | Protein-L-isoaspartate (D-aspartate) O-methyltransferase                                                                                                                                            |
| 929 | Q5VYC1           | 8                    | 33             | 43.4                  | 228    | 24679  | 6.5  | Protein-L-isoaspartate (D-aspartate) O-methyltransferase                                                                                                                                            |
| 930 | Q92979           | 8                    | 14             | 43.4                  | 244    | 26720  | 9.2  | Probable ribosome biogenesis protein NEP1                                                                                                                                                           |
| 931 | P36969-2         | 8                    | 16             | 50                    | 170    | 19478  | 7.9  | Isoform Cytoplasmic of P36969                                                                                                                                                                       |
| 931 | P36969           | 8                    | 16             | 43.1                  | 197    | 22128  | 8.3  | Phospholipid hydroperoxide glutathione peroxidase, mitochondrial precursor                                                                                                                          |
| 931 | UPI00001AAC3F    | 8                    | 16             | 43.1                  | 197    | 22025  | 8.4  | glutathione peroxidase 4 isoform A precursor                                                                                                                                                        |
| 931 | UPI000096F213    | 8                    | 16             | 36.3                  | 234    | 26948  | 10.1 | glutathione peroxidase 4 isoform C precursor                                                                                                                                                        |
| 932 | P35270           | 8                    | 17             | 42.9                  | 261    | 28048  | 8    | Sepiapterin reductase                                                                                                                                                                               |
| 933 | Q15366           | 8                    | 48             | 42.5                  | 365    | 38580  | 6.8  | Poly(rC)-binding protein 2                                                                                                                                                                          |
| 933 | Q6IPF4           | 8                    | 48             | 42.3                  | 366    | 38651  | 6.8  | Poly(RC) binding protein 2                                                                                                                                                                          |
| 934 | Q9NWU5           | 8                    | 23             | 42.2                  | 206    | 23641  | 9.9  | 39S ribosomal protein L22, mitochondrial precursor                                                                                                                                                  |
| 934 | UPI000013D5D9    | 8                    | 23             | 38.3                  | 227    | 26063  | 9.6  | 39S ribosomal protein L22, mitochondrial precursor (L22mt) (MRP-L22).                                                                                                                               |
| 935 | Q9BRG1           | 8                    | 31             | 42                    | 176    | 20748  | 6.3  | Vacuolar protein sorting-associated protein 25                                                                                                                                                      |
| 936 | O96000           | 8                    | 13             | 41.9                  | 172    | 20777  | 8.5  | NADH dehydrogenase [ubiquinone] 1 beta subcomplex subunit 10                                                                                                                                        |
| 937 | Q9HBM1           | 8                    | 12             | 41.5                  | 224    | 26153  | 8    | Kinetochore protein Spc25                                                                                                                                                                           |
| 938 | P10768           | 8                    | 17             | 41.1                  | 282    | 31463  | 7    | S-formylglutathione hydrolase                                                                                                                                                                       |
| 939 | P20340           | 8                    | 62             | 40.9                  | 208    | 23593  | 5.5  | Ras-related protein Rab-6A                                                                                                                                                                          |
| 939 | Q6FGX3           | 8                    | 62             | 40.9                  | 208    | 23550  | 5.4  | RAB6A protein                                                                                                                                                                                       |
| 939 | P20340-2         | 8                    | 62             | 40.9                  | 208    | 23549  | 5.5  | Isoform 2 of P20340                                                                                                                                                                                 |
| 940 | P02792           | 8                    | 55             | 40.6                  | 175    | 20020  | 5.8  | Ferritin light chain                                                                                                                                                                                |

| No. | Accession Number | Unique Peptide Count | Spectrum Count | Sequence Coverage (%) | Length | MolWt | pI   | Descriptive Name                                                                                             |
|-----|------------------|----------------------|----------------|-----------------------|--------|-------|------|--------------------------------------------------------------------------------------------------------------|
| 940 | Q96CU0           | 8                    | 55             | 40.6                  | 175    | 20039 | 5.8  | Ferritin, light polypeptide                                                                                  |
| 940 | Q8WU07           | 8                    | 55             | 40.6                  | 175    | 20062 | 5.8  | Ferritin, light polypeptide                                                                                  |
| 940 | Q6IBT7           | 8                    | 55             | 40.6                  | 175    | 19992 | 5.8  | Ferritin                                                                                                     |
| 941 | Q9BVK6           | 8                    | 51             | 40.2                  | 214    | 25105 | 7.2  | Transmembrane emp24 domain-containing protein 9 precursor                                                    |
| 941 | UPI00001D6EC0    | 8                    | 51             | 36.6                  | 235    | 27277 | 8    | transmembrane emp24 protein transport domain containing 9                                                    |
| 942 | Q13185           | 8                    | 32             | 39.9                  | 183    | 20811 | 5.3  | Chromobox protein homolog 3                                                                                  |
| 943 | Q15181           | 8                    | 24             | 39.8                  | 289    | 32660 | 5.9  | Inorganic pyrophosphatase                                                                                    |
| 944 | P61758           | 8                    | 33             | 39.6                  | 197    | 22658 | 7.1  | Prefoldin subunit 3                                                                                          |
| 945 | P47985           | 8                    | 28             | 39.4                  | 274    | 29668 | 8.3  | Ubiquinol-cytochrome c reductase iron-sulfur subunit, mitochondrial precursor                                |
| 946 | UPI000002552E    | 8                    | 55             | 38.9                  | 216    | 24700 | 9.9  | 60S ribosomal protein L10a (CSA-19).                                                                         |
| 946 | P62906           | 8                    | 55             | 38.7                  | 217    | 24831 | 9.9  | 60S ribosomal protein L10a                                                                                   |
| 947 | Q13151           | 8                    | 35             | 38                    | 305    | 30841 | 9.3  | Heterogeneous nuclear ribonucleoprotein A0                                                                   |
| 948 | P18124           | 8                    | 95             | 37.1                  | 248    | 29226 | 10.7 | 60S ribosomal protein L7                                                                                     |
| 948 | Q3KQU0           | 8                    | 95             | 28.9                  | 318    | 37022 | 10.7 | RPL7 protein                                                                                                 |
| 949 | Q6FHE4           | 8                    | 29             | 36.9                  | 309    | 33709 | 7.3  | CNN2 protein                                                                                                 |
| 949 | Q99439           | 8                    | 29             | 36.9                  | 309    | 33697 | 7.3  | Calponin-2                                                                                                   |
| 950 | P62280           | 8                    | 40             | 36.7                  | 158    | 18431 | 10.3 | 40S ribosomal protein S11                                                                                    |
| 951 | Q9Y277           | 8                    | 23             | 36.7                  | 283    | 30659 | 8.6  | Voltage-dependent anion-selective channel protein 3                                                          |
| 951 | Q9Y277-2         | 8                    | 23             | 36.6                  | 284    | 30790 | 8.6  | Isoform 2 of Q9Y277                                                                                          |
| 952 | Q6IPN0           | 8                    | 195            | 36.4                  | 343    | 36918 | 4.8  | RTN4 protein                                                                                                 |
| 952 | Q7L7Q6           | 8                    | 195            | 33.5                  | 373    | 40318 | 4.8  | RTN4                                                                                                         |
| 953 | Q59G46           | 8                    | 26             | 37.1                  | 280    | 31355 | 4.8  | Thioredoxin-like 1 variant                                                                                   |
| 953 | O43396           | 8                    | 26             | 36                    | 289    | 32251 | 5    | Thioredoxin-like protein 1                                                                                   |
| 954 | O00629           | 8                    | 23             | 35.5                  | 521    | 57887 | 5    | Importin alpha-4 subunit                                                                                     |
| 955 | UPI0000185FC9    | 8                    | 73             | 35.5                  | 155    | 17662 | 10.4 | PREDICTED: similar to 60S ribosomal protein L23a                                                             |
| 955 | P62750           | 8                    | 73             | 35.3                  | 156    | 17695 | 10.4 | 60S ribosomal protein L23a                                                                                   |
| 956 | Q9BVG4           | 8                    | 12             | 35.2                  | 233    | 26057 | 4.8  | UPF0368 protein Cxorf26                                                                                      |
| 957 | Q8WUF0           | 8                    | 13             | 35.1                  | 276    | 30580 | 7.2  | Nitrilase family member 2                                                                                    |
| 957 | Q9NQR4           | 8                    | 13             | 35.1                  | 276    | 30608 | 7.2  | Nit protein 2                                                                                                |
| 958 | Q96C19           | 8                    | 35             | 35                    | 240    | 26697 | 5.2  | EF-hand domain-containing protein 2                                                                          |
| 959 | Q6UXN9           | 8                    | 11             | 34.8                  | 313    | 35079 | 7.7  | WD repeat protein 82                                                                                         |
| 960 | Q9NX40           | 8                    | 16             | 34.3                  | 245    | 27626 | 7.5  | OC1A domain-containing protein 1                                                                             |
| 961 | O00764           | 8                    | 14             | 33.3                  | 312    | 35102 | 6.1  | Pyridoxal kinase                                                                                             |
| 962 | P04179           | 8                    | 36             | 33.3                  | 222    | 24722 | 8.3  | Superoxide dismutase [Mn], mitochondrial precursor                                                           |
| 962 | UPI000006D275    | 8                    | 36             | 33.3                  | 222    | 24750 | 8.3  | manganese superoxide dismutase isoform A precursor                                                           |
| 963 | P62753           | 8                    | 89             | 33.3                  | 249    | 28681 | 10.8 | 40S ribosomal protein S6                                                                                     |
| 963 | Q96DV6           | 8                    | 89             | 33.3                  | 249    | 28709 | 10.9 | Ribosomal protein S6                                                                                         |
| 964 | Q15382           | 8                    | 16             | 33.2                  | 184    | 20497 | 5.9  | GTP-binding protein Rheb precursor                                                                           |
| 964 | Q6NZ61           | 8                    | 16             | 33.2                  | 184    | 20558 | 5.9  | Ras homolog enriched in brain                                                                                |
| 965 | Q96QR8           | 8                    | 13             | 33                    | 312    | 33241 | 5.4  | Transcriptional activator protein Pur-beta                                                                   |
| 966 | Q9BY32           | 8                    | 11             | 33                    | 194    | 21446 | 5.6  | Inosine triphosphate pyrophosphatase                                                                         |
| 967 | P55735           | 8                    | 15             | 32.9                  | 322    | 35541 | 5.5  | Protein SEC13 homolog                                                                                        |
| 968 | Q9HC38-2         | 8                    | 11             | 32.9                  | 298    | 33233 | 5.6  | Isoform 2 of Q9HC38                                                                                          |
| 968 | Q9Y3E8           | 8                    | 11             | 19.4                  | 504    | 55012 | 8.7  | Uncharacterized protein C17orf25                                                                             |
| 969 | P46782           | 8                    | 82             | 32.4                  | 204    | 22876 | 9.7  | 40S ribosomal protein S5                                                                                     |
| 970 | Q53F35           | 8                    | 36             | 32.4                  | 250    | 28673 | 4.1  | Acidic (Leucine-rich) nuclear phosphoprotein 32 family, member B variant                                     |
| 970 | Q92688           | 8                    | 36             | 32.3                  | 251    | 28788 | 4.1  | Acidic leucine-rich nuclear phosphoprotein 32 family member B                                                |
| 971 | UPI00006C0D04    | 8                    | 31             | 32.2                  | 370    | 40821 | 8.9  | PREDICTED: similar to Actin-related protein 2/3 complex subunit 1B (ARP2/3 complex 41 kDa subunit) (p41-ARC) |
| 971 | O15143           | 8                    | 31             | 32                    | 372    | 40950 | 8.4  | Actin-related protein 2/3 complex subunit 1B                                                                 |
| 972 | Q53F20           | 8                    | 21             | 32                    | 266    | 30434 | 3.9  | Acidic (Leucine-rich) nuclear phosphoprotein 32 family, member E variant                                     |
| 972 | Q9BTT0           | 8                    | 21             | 31.7                  | 268    | 30692 | 3.8  | Acidic leucine-rich nuclear phosphoprotein 32 family member E                                                |
| 973 | O43765           | 8                    | 25             | 31.6                  | 313    | 34063 | 4.9  | Small glutamine-rich tetratricopeptide repeat-containing protein A                                           |
| 974 | Q96FW1           | 8                    | 20             | 31.4                  | 271    | 31284 | 4.9  | Ubiquitin thioesterase OTUB1                                                                                 |
| 975 | Q9P287           | 8                    | 12             | 31.2                  | 314    | 35979 | 4.6  | BRCA2 and CDKN1A-interacting protein                                                                         |
| 976 | Q9BY40           | 8                    | 9              | 31                    | 297    | 33602 | 7    | CDA11                                                                                                        |
| 977 | P40261           | 8                    | 31             | 30.7                  | 264    | 29574 | 5.7  | Nicotinamide N-methyltransferase                                                                             |
| 978 | P55209           | 8                    | 39             | 30.4                  | 391    | 45374 | 4.5  | Nucleosome assembly protein 1-like 1                                                                         |
| 979 | P57088           | 8                    | 33             | 30.4                  | 247    | 27978 | 9.7  | Transmembrane protein 33                                                                                     |
| 979 | UPI000015F326    | 8                    | 33             | 30.4                  | 247    | 27951 | 9.7  | transmembrane protein 33                                                                                     |
| 980 | Q14847           | 8                    | 39             | 30.3                  | 261    | 29717 | 7    | LIM and SH3 domain protein 1                                                                                 |
| 980 | UPI0000D62315    | 8                    | 39             | 24.5                  | 322    | 35773 | 8.5  | LIM and SH3 domain protein 1 (LASP-1) (MLN 50).                                                              |
| 980 | Q14847-2         | 8                    | 39             | 24.5                  | 323    | 36014 | 8.6  | Isoform 2 of Q14847                                                                                          |
| 981 | Q5HYL6           | 8                    | 12             | 30.1                  | 352    | 39555 | 5.2  | Hypothetical protein DKFZp686E1899                                                                           |
| 981 | Q9NYL9           | 8                    | 12             | 30.1                  | 352    | 39595 | 5.2  | Tropomodulin-3                                                                                               |
| 982 | Q9UJ70           | 8                    | 22             | 29.9                  | 344    | 37376 | 6.2  | N-acetylglucosamine kinase                                                                                   |
| 983 | P51398           | 8                    | 9              | 29.6                  | 398    | 45566 | 8.9  | Mitochondrial 28S ribosomal protein S29                                                                      |
| 984 | P50402           | 8                    | 43             | 29.5                  | 254    | 28994 | 5.5  | Emerin                                                                                                       |
| 985 | Q53GQ0           | 8                    | 50             | 29.5                  | 312    | 34350 | 9.3  | Estradiol 17-beta-dehydrogenase 12                                                                           |

| No.  | Accession Number | Unique Peptide Count | Spectrum Count | Sequence Coverage (%) | Length | MolWt  | pI  | Descriptive Name                                                                                                                                                                                                                                   |
|------|------------------|----------------------|----------------|-----------------------|--------|--------|-----|----------------------------------------------------------------------------------------------------------------------------------------------------------------------------------------------------------------------------------------------------|
| 985  | UPI000004C79B    | 8                    | 50             | 29.5                  | 312    | 34324  | 9.3 | steroid dehydrogenase homolog                                                                                                                                                                                                                      |
| 986  | Q96C36           | 8                    | 16             | 29.4                  | 320    | 33637  | 7.8 | Pyrroline-5-carboxylate reductase 2                                                                                                                                                                                                                |
| 987  | UPI0000D618EF    | 8                    | 11             | 29.3                  | 417    | 45361  | 8.4 | hydroxysteroid dehydrogenase like 2                                                                                                                                                                                                                |
| 987  | Q6YN16           | 8                    | 11             | 29.2                  | 418    | 45395  | 8   | Hydroxysteroid dehydrogenase-like protein 2                                                                                                                                                                                                        |
| 988  | UPI0000457067    | 8                    | 15             | 30                    | 919    | 101348 | 5.1 | AP-1 complex subunit beta-1 (Adapter-related protein complex 1 beta-1 subunit) (Beta-adaptin 1) (Adaptor protein complex AP-1 beta-1 subunit) (Golgi adaptor HA1/AP1 adaptin beta subunit) (Clathrin assembly protein complex 1 beta large chain). |
| 988  | Q86X54           | 8                    | 15             | 30                    | 919    | 101318 | 5.1 | AP1B1 protein                                                                                                                                                                                                                                      |
| 988  | Q20WL3           | 8                    | 15             | 29.4                  | 939    | 103534 | 5.2 | AP1B1 protein                                                                                                                                                                                                                                      |
| 988  | UPI0000140030    | 8                    | 15             | 29.3                  | 942    | 103921 | 5.1 | adaptor-related protein complex 1 beta 1 subunit isoform b                                                                                                                                                                                         |
| 988  | Q10567-2         | 8                    | 15             | 29.3                  | 942    | 103891 | 5.1 | Isoform B of Q10567                                                                                                                                                                                                                                |
| 988  | Q10567           | 8                    | 15             | 29.1                  | 949    | 104607 | 5.1 | AP-1 complex subunit beta-1                                                                                                                                                                                                                        |
| 988  | UPI000013CED0    | 8                    | 15             | 29.1                  | 949    | 104637 | 5.1 | adaptor-related protein complex 1 beta 1 subunit isoform a                                                                                                                                                                                         |
| 989  | Q9NQG5           | 8                    | 24             | 29.1                  | 326    | 36900  | 6   | Uncharacterized protein C20orf77                                                                                                                                                                                                                   |
| 990  | O76003           | 8                    | 15             | 29                    | 335    | 37432  | 5.4 | Thioredoxin-like protein 2                                                                                                                                                                                                                         |
| 991  | P30443           | 8                    | 29             | 29                    | 365    | 40846  | 6.5 | HLA class I histocompatibility antigen, A-1 alpha chain precursor                                                                                                                                                                                  |
| 991  | P30455           | 8                    | 29             | 29                    | 365    | 40934  | 6.4 | HLA class I histocompatibility antigen, A-36 alpha chain precursor                                                                                                                                                                                 |
| 992  | P31937           | 8                    | 23             | 28.9                  | 336    | 35329  | 8.1 | 3-hydroxyisobutyrate dehydrogenase, mitochondrial precursor                                                                                                                                                                                        |
| 993  | P17931           | 8                    | 11             | 28.8                  | 250    | 26188  | 8.5 | Galectin-3                                                                                                                                                                                                                                         |
| 993  | Q6IBA7           | 8                    | 11             | 28.8                  | 250    | 26152  | 8.5 | LGALS3 protein                                                                                                                                                                                                                                     |
| 993  | Q6FGL0           | 8                    | 11             | 28.8                  | 250    | 26161  | 8.5 | LGALS3 protein                                                                                                                                                                                                                                     |
| 993  | Q59FR8           | 8                    | 11             | 27.9                  | 258    | 27118  | 8.4 | LGALS3 protein variant                                                                                                                                                                                                                             |
| 994  | P78406           | 8                    | 11             | 28.8                  | 368    | 40968  | 7.8 | mRNA-associated protein mrnp 41                                                                                                                                                                                                                    |
| 995  | Q13011           | 8                    | 18             | 28.7                  | 328    | 35816  | 8   | Delta(3,5)-Delta(2,4)-dienoyl-CoA isomerase, mitochondrial precursor                                                                                                                                                                               |
| 996  | Q9H488           | 8                    | 14             | 28.6                  | 388    | 43956  | 8.5 | GDP-fucose protein O-fucosyltransferase 1 precursor                                                                                                                                                                                                |
| 997  | Q86UY0           | 8                    | 16             | 28.3                  | 360    | 40369  | 5.8 | TXNDC5 protein                                                                                                                                                                                                                                     |
| 997  | Q8NBS9           | 8                    | 16             | 23.6                  | 432    | 47629  | 6   | Thioredoxin domain-containing protein 5 precursor                                                                                                                                                                                                  |
| 998  | Q96PU8-5         | 8                    | 9              | 30.3                  | 317    | 35233  | 6.2 | Isoform 5 of Q96PU8                                                                                                                                                                                                                                |
| 998  | Q96PU8-8         | 8                    | 9              | 30.1                  | 319    | 35248  | 7.4 | Isoform 8 of Q96PU8                                                                                                                                                                                                                                |
| 998  | Q96PU8-3         | 8                    | 9              | 28.8                  | 333    | 36926  | 8.5 | Isoform 3 of Q96PU8                                                                                                                                                                                                                                |
| 998  | Q96PU8           | 8                    | 9              | 28.2                  | 341    | 37671  | 8.5 | Quaking protein                                                                                                                                                                                                                                    |
| 998  | Q96PU8-2         | 8                    | 9              | 28.2                  | 341    | 37466  | 8.4 | Isoform 2 of Q96PU8                                                                                                                                                                                                                                |
| 998  | Q96PU8-7         | 8                    | 9              | 27.7                  | 347    | 38313  | 7   | Isoform 7 of Q96PU8                                                                                                                                                                                                                                |
| 999  | Q9BTT5           | 8                    | 19             | 31.4                  | 338    | 38442  | 9.7 | Similar to NADH dehydrogenase (Ubiquinone) 1 alpha subcomplex, 9                                                                                                                                                                                   |
| 999  | Q16795           | 8                    | 19             | 28.1                  | 377    | 42510  | 9.8 | NADH dehydrogenase [ubiquinone] 1 alpha subcomplex subunit 9, mitochondrial precursor                                                                                                                                                              |
| 1000 | Q567T7           | 8                    | 14             | 27.8                  | 334    | 37480  | 7.6 | Methionine adenosyltransferase 2 beta                                                                                                                                                                                                              |
| 1000 | Q9NZL9           | 8                    | 14             | 27.8                  | 334    | 37552  | 7.4 | Methionine adenosyltransferase regulatory beta subunit                                                                                                                                                                                             |
| 1001 | O75323           | 8                    | 18             | 26.9                  | 286    | 33743  | 9.4 | Protein NipSnap2                                                                                                                                                                                                                                   |
| 1002 | Q9BTV4           | 8                    | 32             | 25.8                  | 400    | 44876  | 8.1 | Transmembrane protein 43                                                                                                                                                                                                                           |
| 1003 | Q96HI4           | 8                    | 22             | 25.7                  | 494    | 56604  | 7.8 | NMT1 protein                                                                                                                                                                                                                                       |
| 1003 | P30419           | 8                    | 22             | 25.6                  | 496    | 56806  | 7.8 | Glycylpeptide N-tetradecanoyltransferase 1                                                                                                                                                                                                         |
| 1003 | UPI0000D6234C    | 8                    | 22             | 25.5                  | 498    | 56978  | 7.8 | Glycylpeptide N-tetradecanoyltransferase 1 (EC 2.3.1.97) (Peptide N- myristoyltransferase 1) (Myristoyl-CoA:protein N-myristoyltransferase 1) (NMT 1) (Type I N-myristoyltransferase).                                                             |
| 1004 | UPI00002371B1    | 8                    | 17             | 27.6                  | 406    | 45169  | 9.2 | DEAD (Asp-Glu-Ala-Asp) box polypeptide 47 isoform 2                                                                                                                                                                                                |
| 1004 | Q53GJ1           | 8                    | 17             | 25                    | 448    | 49882  | 9.2 | DEAD (Asp-Glu-Ala-Asp) box polypeptide 47 isoform 1 variant                                                                                                                                                                                        |
| 1004 | Q9H0S4           | 8                    | 17             | 24.6                  | 455    | 50647  | 9.1 | Probable ATP-dependent RNA helicase DDX47                                                                                                                                                                                                          |
| 1005 | P18031           | 8                    | 14             | 24.6                  | 435    | 49967  | 6.3 | Tyrosine-protein phosphatase non-receptor type 1                                                                                                                                                                                                   |
| 1006 | O60884           | 8                    | 17             | 24.3                  | 412    | 45746  | 6.5 | DnaJ homolog subfamily A member 2                                                                                                                                                                                                                  |
| 1007 | Q7Z518           | 8                    | 15             | 24.3                  | 354    | 40677  | 8.5 | NADH dehydrogenase                                                                                                                                                                                                                                 |
| 1007 | O95299           | 8                    | 15             | 24.2                  | 355    | 40751  | 8.5 | NADH dehydrogenase [ubiquinone] 1 alpha subcomplex subunit 10, mitochondrial precursor                                                                                                                                                             |
| 1008 | UPI0000D612BA    | 8                    | 13             | 26.7                  | 367    | 41317  | 6.9 | WD repeat and FYVE domain-containing protein 1 (WD40- and FYVE domain- containing protein 1) (Phosphoinositide-binding protein 1) (FENS-1) (Zinc finger FYVE domain-containing protein 17).                                                        |
| 1008 | Q8IWB7           | 8                    | 13             | 23.9                  | 410    | 46324  | 7.3 | WD repeat and FYVE domain-containing protein 1                                                                                                                                                                                                     |
| 1009 | Q9UQD4           | 8                    | 9              | 24.9                  | 353    | 39840  | 5.2 | SH3-containing Grb-2-like 1 protein                                                                                                                                                                                                                |
| 1009 | Q99961           | 8                    | 9              | 23.9                  | 368    | 41490  | 5.4 | SH3-containing GRB2-like protein 1                                                                                                                                                                                                                 |
| 1010 | Q8NCF7           | 8                    | 94             | 23.3                  | 361    | 39933  | 9.4 | CDNA FLJ90278 fis, clone NT2RP1000325, highly similar to Phosphate carrier protein, mitochondrialprecursor                                                                                                                                         |

| No.  | Accession Number | Unique Peptide Count | Spectrum Count | Sequence Coverage (%) | Length | MolWt | pI  | Descriptive Name                                                                                                                                                        |
|------|------------------|----------------------|----------------|-----------------------|--------|-------|-----|-------------------------------------------------------------------------------------------------------------------------------------------------------------------------|
| 1010 | Q7Z7N7           | 8                    | 94             | 23.3                  | 361    | 39959 | 9.4 | Solute carrier family 25 (Mitochondrial carrier; phosphate carrier), member 3                                                                                           |
| 1010 | Q53HC3           | 8                    | 94             | 23.3                  | 361    | 39929 | 9.4 | Solute carrier family 25 member 3 isoform b variant                                                                                                                     |
| 1010 | Q00325           | 8                    | 94             | 23.2                  | 362    | 40095 | 9.4 | Phosphate carrier protein, mitochondrial precursor                                                                                                                      |
| 1011 | Q9Y376           | 8                    | 21             | 23.2                  | 341    | 39869 | 6.9 | Calcium-binding protein 39                                                                                                                                              |
| 1012 | P35237           | 8                    | 12             | 22.9                  | 376    | 42590 | 5.3 | Serpin B6                                                                                                                                                               |
| 1012 | Q5TD06           | 8                    | 12             | 22.9                  | 376    | 42622 | 5.3 | Serpin peptidase inhibitor, clade B (Ovalbumin), member 6                                                                                                               |
| 1012 | Q59F97           | 8                    | 12             | 21.9                  | 393    | 44446 | 5.2 | Hypothetical protein                                                                                                                                                    |
| 1012 | UPI0000D613D8    | 8                    | 12             | 21                    | 409    | 46331 | 5.9 | Serpin B6 (Placental thrombin inhibitor) (Cytoplasmic antiproteinase) (CAP) (Protease inhibitor 6) (PI-6).                                                              |
| 1013 | Q9Y383           | 8                    | 32             | 22.7                  | 392    | 46514 | 10  | Putative RNA-binding protein Luc7-like 2                                                                                                                                |
| 1013 | UPI000013D41E    | 8                    | 32             | 22.2                  | 401    | 47506 | 10  | Putative RNA-binding protein Luc7-like 2.                                                                                                                               |
| 1014 | Q5H907           | 8                    | 15             | 22.5                  | 521    | 55796 | 7.8 | Melanoma antigen family D, 2                                                                                                                                            |
| 1014 | UPI0000D61D7D    | 8                    | 15             | 22.5                  | 521    | 55830 | 7.8 | Melanoma-associated antigen D2 (MAGE-D2 antigen) (MAGE-D) (Breast cancer-associated gene 1 protein) (BCG-1) (11B6) (Hepatocellular carcinoma-associated protein JCL-1). |
| 1014 | UPI0000D61D7E    | 8                    | 15             | 21.3                  | 549    | 59453 | 9.7 | Melanoma-associated antigen D2 (MAGE-D2 antigen) (MAGE-D) (Breast cancer-associated gene 1 protein) (BCG-1) (11B6) (Hepatocellular carcinoma-associated protein JCL-1). |
| 1014 | Q5H909           | 8                    | 15             | 21.3                  | 550    | 59525 | 9.7 | Melanoma antigen family D, 2                                                                                                                                            |
| 1014 | UPI0000457842    | 8                    | 15             | 19.9                  | 588    | 63151 | 9.3 | Melanoma-associated antigen D2 (MAGE-D2 antigen) (MAGE-D) (Breast cancer-associated gene 1 protein) (BCG-1) (11B6) (Hepatocellular carcinoma-associated protein JCL-1). |
| 1014 | Q9UNF1-2         | 8                    | 15             | 19.9                  | 588    | 63167 | 9.3 | Isoform 2 of Q9UNF1                                                                                                                                                     |
| 1014 | Q9UNF1           | 8                    | 15             | 19.3                  | 606    | 64954 | 9.3 | Melanoma-associated antigen D2                                                                                                                                          |
| 1015 | Q0VGA5           | 8                    | 12             | 21.9                  | 511    | 58407 | 6.4 | SARS protein                                                                                                                                                            |
| 1015 | P49591           | 8                    | 12             | 21.8                  | 514    | 58777 | 6.4 | Seryl-tRNA synthetase, cytoplasmic                                                                                                                                      |
| 1015 | Q53HA4           | 8                    | 12             | 21.8                  | 514    | 58690 | 6.4 | Seryl-tRNA synthetase variant                                                                                                                                           |
| 1015 | UPI0000D61F7C    | 8                    | 12             | 20.9                  | 536    | 61285 | 7.1 | Seryl-tRNA synthetase, cytoplasmic (EC 6.1.1.11) (Serine--tRNA ligase) (SerRS).                                                                                         |
| 1015 | Q5T5C7           | 8                    | 12             | 20.9                  | 536    | 61313 | 7.1 | Seryl-tRNA synthetase                                                                                                                                                   |
| 1016 | Q9H3N1           | 8                    | 33             | 21.8                  | 280    | 31791 | 5   | Thioredoxin domain-containing protein 1 precursor                                                                                                                       |
| 1016 | UPI000006E5F1    | 8                    | 33             | 21.8                  | 280    | 31806 | 5   | thioredoxin domain containing                                                                                                                                           |
| 1017 | Q9NY27           | 8                    | 11             | 21.8                  | 495    | 54704 | 4.7 | Protein phosphatase 4 regulatory subunit 2                                                                                                                              |
| 1018 | O60784           | 8                    | 11             | 21.7                  | 492    | 53818 | 4.7 | Target of Myb protein 1                                                                                                                                                 |
| 1018 | Q86X74           | 8                    | 11             | 21.7                  | 493    | 53875 | 4.7 | Target of myb1                                                                                                                                                          |
| 1019 | Q8TCT9-5         | 8                    | 108            | 23.9                  | 335    | 36814 | 6.7 | Isoform 5 of Q8TCT9                                                                                                                                                     |
| 1019 | Q8TCT9           | 8                    | 108            | 21.2                  | 377    | 41488 | 6.4 | Minor histocompatibility antigen H13                                                                                                                                    |
| 1020 | Q07960           | 8                    | 20             | 21                    | 439    | 50436 | 6.3 | Rho GTPase-activating protein 1                                                                                                                                         |
| 1021 | Q53G16           | 8                    | 14             | 20.8                  | 437    | 50409 | 4.8 | Synaptonemal complex protein SC65 variant                                                                                                                               |
| 1021 | Q92791           | 8                    | 14             | 20.8                  | 437    | 50381 | 4.8 | Nucleolar autoantigen No55                                                                                                                                              |
| 1022 | Q8N1G4           | 8                    | 18             | 20.8                  | 583    | 63473 | 8.3 | Leucine-rich repeat-containing protein 47                                                                                                                               |
| 1023 | Q96A33-2         | 8                    | 13             | 20.6                  | 480    | 55318 | 4.7 | Isoform 2 of Q96A33                                                                                                                                                     |
| 1023 | Q96A33           | 8                    | 13             | 20.5                  | 483    | 55874 | 4.9 | Coiled-coil domain-containing protein 47 precursor                                                                                                                      |
| 1023 | UPI0000073E7C    | 8                    | 13             | 20.5                  | 483    | 55816 | 4.9 | coiled-coil domain containing 47                                                                                                                                        |
| 1024 | Q13418           | 8                    | 12             | 20.4                  | 452    | 51419 | 8.1 | Integrin-linked protein kinase                                                                                                                                          |
| 1025 | Q59EH7           | 8                    | 10             | 20.3                  | 483    | 55418 | 7.5 | DnaJ (Hsp40) homolog, subfamily C, member 7 variant                                                                                                                     |
| 1025 | Q99615           | 8                    | 10             | 19.8                  | 494    | 56441 | 7   | DnaJ homolog subfamily C member 7                                                                                                                                       |
| 1026 | P07099           | 8                    | 18             | 20                    | 455    | 52949 | 7.3 | Epoxide hydrolase 1                                                                                                                                                     |
| 1027 | O75306           | 8                    | 15             | 19.9                  | 463    | 52546 | 7.6 | NADH dehydrogenase [ubiquinone] iron-sulfur protein 2, mitochondrial precursor                                                                                          |
| 1028 | Q8N2L6           | 8                    | 19             | 19.5                  | 447    | 49824 | 9.4 | CDNA FLJ90138 fis, clone HEMBB1000905, weakly similar to TRANSCRIPTIONAL REPRESSOR RCO-1                                                                                |
| 1028 | Q9Y4P3           | 8                    | 19             | 19.5                  | 447    | 49798 | 9.4 | Transducin beta-like 2 protein                                                                                                                                          |
| 1029 | Q14166           | 8                    | 17             | 19.1                  | 644    | 74404 | 5.5 | Tubulin--tyrosine ligase-like protein 12                                                                                                                                |
| 1030 | Q14554           | 8                    | 15             | 18.3                  | 519    | 59594 | 7.9 | Protein disulfide-isomerase A5 precursor                                                                                                                                |
| 1031 | O75475           | 8                    | 18             | 17.4                  | 530    | 60103 | 9.1 | PC4 and SFRS1-interacting protein                                                                                                                                       |
| 1032 | Q53GW1           | 8                    | 9              | 17.3                  | 642    | 72308 | 6.4 | Vesicle transport-related protein isoform a variant                                                                                                                     |
| 1032 | Q8VVM8           | 8                    | 9              | 17.3                  | 642    | 72380 | 6.3 | Sec1 family domain-containing protein 1                                                                                                                                 |
| 1033 | Q59GU6           | 8                    | 13             | 20.8                  | 432    | 50099 | 7   | Sorting nexin 1 isoform a variant                                                                                                                                       |
| 1033 | Q13596-2         | 8                    | 13             | 19.7                  | 457    | 51813 | 5.6 | Isoform 1A of Q13596                                                                                                                                                    |
| 1033 | UPI0000D61352    | 8                    | 13             | 19.6                  | 460    | 52225 | 5.9 | Sorting nexin-1.                                                                                                                                                        |
| 1033 | UPI0000456869    | 8                    | 13             | 17.3                  | 521    | 58955 | 5.2 | Sorting nexin-1.                                                                                                                                                        |
| 1033 | Q13596           | 8                    | 13             | 17.2                  | 522    | 59070 | 5.1 | Sorting nexin-1                                                                                                                                                         |
| 1033 | Q53GY8           | 8                    | 13             | 17.2                  | 522    | 59012 | 5.2 | Sorting nexin 1 isoform a variant                                                                                                                                       |
| 1033 | Q6ZRJ8           | 8                    | 13             | 16.2                  | 557    | 63022 | 5.5 | CDNA FLJ46302 fis, clone TESTI4036048, highly similar to Sorting nexin 1                                                                                                |

| No.  | Accession Number | Unique Peptide Count | Spectrum Count | Sequence Coverage (%) | Length | MolWt | pI  | Descriptive Name                                                                                                                                                                                                                                                                                                                                                                                                                                   |
|------|------------------|----------------------|----------------|-----------------------|--------|-------|-----|----------------------------------------------------------------------------------------------------------------------------------------------------------------------------------------------------------------------------------------------------------------------------------------------------------------------------------------------------------------------------------------------------------------------------------------------------|
| 1034 | O43252           | 8                    | 16             | 17                    | 624    | 70833 | 6.9 | Bifunctional 3'-phosphoadenosine 5'-phosphosulfate synthetase 1 (PAPS synthetase 1) (PAPSS 1) (Sulfurylase kinase 1) (SK1) (SK 1) [Includes: Sulfate adenyllyltransferase (EC 2.7.7.4) (Sulfate adenylate transferase) (SAT) (ATP-sulfurylase); Adenylyl-sulfate kinase (EC 2.7.1.25) (Adenylylsulfate 3'-phosphotransferase) (APS kinase) (Adenosine-5'-phosphosulfate 3'-phosphotransferase) (3'-phosphoadenosine-5'-phosphosulfate synthetase)] |
| 1035 | Q8IW76           | 8                    | 26             | 17.7                  | 513    | 57620 | 8.3 | EIF2AK2 protein                                                                                                                                                                                                                                                                                                                                                                                                                                    |
| 1035 | P19525           | 8                    | 26             | 16.5                  | 551    | 62094 | 8.4 | Interferon-induced, double-stranded RNA-activated protein kinase                                                                                                                                                                                                                                                                                                                                                                                   |
| 1036 | Q15758           | 8                    | 86             | 16.3                  | 541    | 56598 | 5.5 | Neutral amino acid transporter B(0) (ATB(0))                                                                                                                                                                                                                                                                                                                                                                                                       |
| 1036 | Q71UA6           | 8                    | 86             | 16.3                  | 541    | 56583 | 5.5 | Neutral amino acid transporter                                                                                                                                                                                                                                                                                                                                                                                                                     |
| 1037 | Q5JPT5           | 8                    | 17             | 16.6                  | 628    | 68550 | 7.5 | SH3-domain kinase binding protein 1                                                                                                                                                                                                                                                                                                                                                                                                                |
| 1037 | Q5JPR3           | 8                    | 17             | 16.1                  | 645    | 70443 | 8.6 | SH3-domain kinase binding protein 1                                                                                                                                                                                                                                                                                                                                                                                                                |
| 1037 | Q96B97           | 8                    | 17             | 15.6                  | 665    | 73126 | 6.6 | SH3 domain-containing kinase-binding protein 1                                                                                                                                                                                                                                                                                                                                                                                                     |
| 1038 | Q6GMQ6           | 8                    | 30             | 16.9                  | 610    | 66393 | 8.8 | Phosphatidylinositol binding clathrin assembly protein                                                                                                                                                                                                                                                                                                                                                                                             |
| 1038 | Q13492-2         | 8                    | 30             | 16.3                  | 632    | 68764 | 7.9 | Isoform 2 of Q13492                                                                                                                                                                                                                                                                                                                                                                                                                                |
| 1038 | Q13492           | 8                    | 30             | 15.8                  | 652    | 70755 | 7.9 | Phosphatidylinositol-binding clathrin assembly protein                                                                                                                                                                                                                                                                                                                                                                                             |
| 1038 | Q4LE54           | 8                    | 30             | 14.3                  | 721    | 77397 | 8.4 | PICALM variant protein                                                                                                                                                                                                                                                                                                                                                                                                                             |
| 1039 | Q69YH4           | 8                    | 32             | 15.4                  | 622    | 70064 | 8.7 | Hypothetical protein DKFZp666E065                                                                                                                                                                                                                                                                                                                                                                                                                  |
| 1039 | UPI00003FF926    | 8                    | 32             | 13.9                  | 689    | 77151 | 9.1 | hypothetical protein LOC54867 isoform 1                                                                                                                                                                                                                                                                                                                                                                                                            |
| 1040 | Q05BV5           | 8                    | 10             | 15.2                  | 660    | 71801 | 7   | OGFR protein                                                                                                                                                                                                                                                                                                                                                                                                                                       |
| 1041 | Q2Z2K8           | 8                    | 13             | 14.7                  | 754    | 85562 | 5.8 | Endothelin-converting enzyme-1c                                                                                                                                                                                                                                                                                                                                                                                                                    |
| 1041 | P42892-2         | 8                    | 13             | 14.6                  | 758    | 85808 | 6.5 | Isoform A of P42892                                                                                                                                                                                                                                                                                                                                                                                                                                |
| 1041 | P42892-4         | 8                    | 13             | 14.5                  | 767    | 87023 | 5.8 | Isoform D of P42892                                                                                                                                                                                                                                                                                                                                                                                                                                |
| 1041 | P42892           | 8                    | 13             | 14.4                  | 770    | 87164 | 5.9 | Endothelin-converting enzyme 1                                                                                                                                                                                                                                                                                                                                                                                                                     |
| 1042 | Q9BV61           | 8                    | 47             | 13.9                  | 699    | 79357 | 7.8 | TRAP1 protein                                                                                                                                                                                                                                                                                                                                                                                                                                      |
| 1042 | Q12931           | 8                    | 47             | 13.8                  | 704    | 80110 | 8.2 | Heat shock protein 75 kDa, mitochondrial precursor                                                                                                                                                                                                                                                                                                                                                                                                 |
| 1042 | UPI0000001C1A    | 8                    | 47             | 13.8                  | 704    | 80011 | 8   | TNF receptor-associated protein 1                                                                                                                                                                                                                                                                                                                                                                                                                  |
| 1042 | Q53G55           | 8                    | 47             | 13.8                  | 704    | 80039 | 8   | TNF receptor-associated protein 1 variant                                                                                                                                                                                                                                                                                                                                                                                                          |
| 1042 | Q53FS6           | 8                    | 47             | 13.8                  | 704    | 80091 | 8   | TNF receptor-associated protein 1 variant                                                                                                                                                                                                                                                                                                                                                                                                          |
| 1043 | Q96AC1-2         | 8                    | 18             | 14.8                  | 633    | 72397 | 7.5 | Isoform 2 of Q96AC1                                                                                                                                                                                                                                                                                                                                                                                                                                |
| 1043 | Q96AC1           | 8                    | 18             | 13.8                  | 680    | 77861 | 6.7 | Pleckstrin homology domain-containing family C member 1                                                                                                                                                                                                                                                                                                                                                                                            |
| 1044 | Q9NVI7-2         | 8                    | 15             | 14.7                  | 586    | 66218 | 9.2 | Isoform 2 of Q9NVI7                                                                                                                                                                                                                                                                                                                                                                                                                                |
| 1044 | Q9NVI7           | 8                    | 15             | 13.6                  | 634    | 71369 | 9   | ATPase family AAA domain-containing protein 3A                                                                                                                                                                                                                                                                                                                                                                                                     |
| 1044 | UPI0000073837    | 8                    | 15             | 13.6                  | 634    | 71357 | 9   | ATPase family, AAA domain containing 3A                                                                                                                                                                                                                                                                                                                                                                                                            |
| 1045 | P19022           | 8                    | 10             | 13.2                  | 906    | 99809 | 4.8 | Cadherin-2 precursor                                                                                                                                                                                                                                                                                                                                                                                                                               |
| 1046 | P33992           | 8                    | 12             | 13.2                  | 734    | 82286 | 8.4 | DNA replication licensing factor MCM5                                                                                                                                                                                                                                                                                                                                                                                                              |
| 1046 | Q53FG5           | 8                    | 12             | 13.2                  | 734    | 82237 | 8.3 | Minichromosome maintenance deficient protein 5 variant                                                                                                                                                                                                                                                                                                                                                                                             |
| 1047 | Q96A78           | 8                    | 14             | 13.4                  | 808    | 89035 | 6.9 | TBL3 protein (Transducin (Beta)-like 3)                                                                                                                                                                                                                                                                                                                                                                                                            |
| 1047 | Q8IVB7           | 8                    | 14             | 13.4                  | 808    | 88936 | 6.9 | Transducin (Beta)-like 3                                                                                                                                                                                                                                                                                                                                                                                                                           |
| 1047 | Q59GD6           | 8                    | 14             | 13                    | 832    | 91238 | 7   | Transducin beta-like 3 variant                                                                                                                                                                                                                                                                                                                                                                                                                     |
| 1048 | Q96JZ5           | 8                    | 40             | 13                    | 545    | 62941 | 7.5 | CDNA FLJ14882 fis, clone PLACE1003537, weakly similar to ENDOSOMAL P24A PROTEIN                                                                                                                                                                                                                                                                                                                                                                    |
| 1048 | UPI0000169B24    | 8                    | 40             | 12.1                  | 589    | 67870 | 7.2 | transmembrane 9 superfamily member 3                                                                                                                                                                                                                                                                                                                                                                                                               |
| 1048 | Q9HD45           | 8                    | 40             | 12.1                  | 589    | 67888 | 7.2 | Transmembrane 9 superfamily protein member 3 precursor                                                                                                                                                                                                                                                                                                                                                                                             |
| 1049 | Q15003           | 8                    | 19             | 12.8                  | 741    | 82563 | 5.1 | Condensin complex subunit 2                                                                                                                                                                                                                                                                                                                                                                                                                        |
| 1050 | P49589-2         | 8                    | 24             | 12.9                  | 726    | 82846 | 7   | Isoform 2 of P49589                                                                                                                                                                                                                                                                                                                                                                                                                                |
| 1050 | UPI00004F8E1C    | 8                    | 24             | 12.7                  | 738    | 84472 | 6.4 | cysteinyl-tRNA synthetase isoform d                                                                                                                                                                                                                                                                                                                                                                                                                |
| 1050 | P49589           | 8                    | 24             | 12.6                  | 748    | 85473 | 6.7 | Cysteinyl-tRNA synthetase, cytoplasmic                                                                                                                                                                                                                                                                                                                                                                                                             |
| 1050 | Q5HYE4           | 8                    | 24             | 11.3                  | 831    | 94638 | 6.8 | Hypothetical protein DKFZp686F1612                                                                                                                                                                                                                                                                                                                                                                                                                 |
| 1051 | Q13617           | 8                    | 13             | 12.5                  | 745    | 86983 | 6.9 | Cullin-2                                                                                                                                                                                                                                                                                                                                                                                                                                           |
| 1052 | Q9H5A4           | 8                    | 262            | 26                    | 338    | 36733 | 5.4 | CD44 molecule                                                                                                                                                                                                                                                                                                                                                                                                                                      |
| 1052 | P16070-14        | 8                    | 262            | 22.2                  | 396    | 43157 | 5.3 | Isoform 14 of P16070                                                                                                                                                                                                                                                                                                                                                                                                                               |
| 1052 | P16070-13        | 8                    | 262            | 20.7                  | 425    | 46249 | 5.2 | Isoform 13 of P16070                                                                                                                                                                                                                                                                                                                                                                                                                               |
| 1052 | P16070-11        | 8                    | 262            | 20.5                  | 429    | 46565 | 5.7 | Isoform 11 of P16070                                                                                                                                                                                                                                                                                                                                                                                                                               |
| 1052 | Q9H5A6           | 8                    | 262            | 18.7                  | 470    | 50728 | 5.4 | CD44 molecule                                                                                                                                                                                                                                                                                                                                                                                                                                      |
| 1052 | UPI000037848D    | 8                    | 262            | 17.8                  | 493    | 53411 | 5.4 | CD44 antigen isoform 3 precursor                                                                                                                                                                                                                                                                                                                                                                                                                   |
| 1052 | P16070-10        | 8                    | 262            | 17.8                  | 493    | 53399 | 5.4 | Isoform 10 of P16070                                                                                                                                                                                                                                                                                                                                                                                                                               |
| 1052 | P16070-16        | 8                    | 262            | 13.2                  | 668    | 73138 | 5.4 | Isoform 16 of P16070                                                                                                                                                                                                                                                                                                                                                                                                                               |
| 1052 | P16070-8         | 8                    | 262            | 13.1                  | 674    | 74404 | 5.2 | Isoform 8 of P16070                                                                                                                                                                                                                                                                                                                                                                                                                                |
| 1052 | Q9H5A7           | 8                    | 262            | 13                    | 676    | 73929 | 5.3 | CD44 molecule                                                                                                                                                                                                                                                                                                                                                                                                                                      |
| 1052 | P16070-17        | 8                    | 262            | 12.7                  | 691    | 75945 | 5.3 | Isoform 17 of P16070                                                                                                                                                                                                                                                                                                                                                                                                                               |
| 1052 | UPI000037848C    | 8                    | 262            | 12.6                  | 699    | 76612 | 5.3 | CD44 antigen isoform 2 precursor                                                                                                                                                                                                                                                                                                                                                                                                                   |
| 1052 | P16070-6         | 8                    | 262            | 12.6                  | 699    | 76692 | 5.3 | Isoform 6 of P16070                                                                                                                                                                                                                                                                                                                                                                                                                                |
| 1052 | P16070-4         | 8                    | 262            | 12.6                  | 699    | 76628 | 5.3 | Isoform 4 of P16070                                                                                                                                                                                                                                                                                                                                                                                                                                |
| 1052 | P16070-3         | 8                    | 262            | 12.4                  | 711    | 77999 | 5.4 | Isoform 3 of P16070                                                                                                                                                                                                                                                                                                                                                                                                                                |
| 1052 | P16070-7         | 8                    | 262            | 12.3                  | 713    | 78461 | 5.4 | Isoform 7 of P16070                                                                                                                                                                                                                                                                                                                                                                                                                                |
| 1052 | Q9H5A5           | 8                    | 262            | 12.2                  | 719    | 78854 | 5.3 | CD44 molecule                                                                                                                                                                                                                                                                                                                                                                                                                                      |
| 1052 | P16070-5         | 8                    | 262            | 12                    | 734    | 80806 | 5.3 | Isoform 5 of P16070                                                                                                                                                                                                                                                                                                                                                                                                                                |
| 1052 | P16070           | 8                    | 262            | 11.9                  | 742    | 81554 | 5.3 | CD44 antigen precursor                                                                                                                                                                                                                                                                                                                                                                                                                             |



| No.  | Accession Number | Unique Peptide Count | Spectrum Count | Sequence Coverage (%) | Length | MolWt  | pI   | Descriptive Name                                                                                                                                                                                                                                                  |
|------|------------------|----------------------|----------------|-----------------------|--------|--------|------|-------------------------------------------------------------------------------------------------------------------------------------------------------------------------------------------------------------------------------------------------------------------|
| 1052 | UPI000013D3FE    | 8                    | 262            | 11.9                  | 742    | 81538  | 5.3  | CD44 antigen isoform 1 precursor                                                                                                                                                                                                                                  |
| 1053 | A4D1C5           | 8                    | 16             | 11.5                  | 780    | 88106  | 5.6  | Protein tyrosine phosphatase, non-receptor type 12                                                                                                                                                                                                                |
| 1053 | Q05209           | 8                    | 16             | 11.5                  | 780    | 88120  | 5.6  | Tyrosine-protein phosphatase non-receptor type 12                                                                                                                                                                                                                 |
| 1054 | Q9H3U1-2         | 8                    | 9              | 11.7                  | 929    | 101675 | 6.1  | Isoform 2 of Q9H3U1                                                                                                                                                                                                                                               |
| 1054 | Q9H3U1           | 8                    | 9              | 11.5                  | 944    | 103077 | 6.1  | UNC45 homolog A                                                                                                                                                                                                                                                   |
| 1055 | P56192           | 8                    | 15             | 10.4                  | 900    | 101116 | 6.2  | Methionyl-tRNA synthetase, cytoplasmic                                                                                                                                                                                                                            |
| 1056 | Q53GS1           | 8                    | 15             | 10.7                  | 878    | 98262  | 5.6  | MutS homolog 2 variant                                                                                                                                                                                                                                            |
| 1056 | Q53FK0           | 8                    | 15             | 10.7                  | 878    | 98222  | 5.7  | MutS homolog 2 variant                                                                                                                                                                                                                                            |
| 1056 | P43246           | 8                    | 15             | 10.1                  | 934    | 104743 | 5.8  | DNA mismatch repair protein Msh2                                                                                                                                                                                                                                  |
| 1057 | O14964           | 8                    | 12             | 10                    | 777    | 86192  | 6.2  | Hepatocyte growth factor-regulated tyrosine kinase substrate                                                                                                                                                                                                      |
| 1058 | Q8TCJ2           | 8                    | 58             | 10                    | 826    | 93674  | 8.9  | Dolichyl-diphosphooligosaccharide--protein glycosyltransferase subunit STT3B                                                                                                                                                                                      |
| 1059 | Q9H0D6-2         | 8                    | 21             | 10.5                  | 874    | 99962  | 8    | Isoform 2 of Q9H0D6                                                                                                                                                                                                                                               |
| 1059 | Q9H0D6           | 8                    | 21             | 9.7                   | 950    | 108583 | 7.5  | 5'-3' exoribonuclease 2                                                                                                                                                                                                                                           |
| 1060 | Q8IYB3-2         | 8                    | 21             | 9.5                   | 902    | 102126 | 11.8 | Isoform 2 of Q8IYB3                                                                                                                                                                                                                                               |
| 1060 | Q8IYB3           | 8                    | 21             | 9.5                   | 904    | 102335 | 11.8 | Serine/arginine repetitive matrix protein 1                                                                                                                                                                                                                       |
| 1060 | Q5VVN3           | 8                    | 21             | 9.4                   | 913    | 103390 | 11.8 | Serine/arginine repetitive matrix 1                                                                                                                                                                                                                               |
| 1061 | Q01970           | 8                    | 15             | 8.3                   | 1234   | 138799 | 5.9  | 1-phosphatidylinositol-4,5-bisphosphate phosphodiesterase beta 3                                                                                                                                                                                                  |
| 1062 | Q15020           | 8                    | 20             | 8.3                   | 963    | 109935 | 5.6  | Squamous cell carcinoma antigen recognized by T-cells 3                                                                                                                                                                                                           |
| 1063 | O00267           | 8                    | 13             | 7.8                   | 1087   | 121000 | 5.1  | Transcription elongation factor SPT5                                                                                                                                                                                                                              |
| 1063 | UPI0000D6179E    | 8                    | 13             | 7.8                   | 1083   | 120527 | 5.1  | Transcription elongation factor SPT5 (hSPT5) (DRB sensitivity-inducing factor large subunit) (DSIF large subunit) (DSIF p160) (Tat- cotransactivator 1 protein) (Tat-CT1 protein).                                                                                |
| 1063 | UPI0000456CB7    | 8                    | 13             | 7.8                   | 1087   | 121028 | 5    | Transcription elongation factor SPT5 (hSPT5) (DRB sensitivity-inducing factor large subunit) (DSIF large subunit) (DSIF p160) (Tat- cotransactivator 1 protein) (Tat-CT1 protein).                                                                                |
| 1063 | O00267-2         | 8                    | 13             | 7.8                   | 1083   | 120499 | 5.1  | Isoform 2 of O00267                                                                                                                                                                                                                                               |
| 1064 | UPI0000D625BB    | 8                    | 10             | 6.9                   | 1362   | 155859 | 5.1  | Ubiquitin carboxyl-terminal hydrolase 47 (EC 3.1.2.15) (Ubiquitin thioesterase 47) (Ubiquitin-specific-processing protease 47) (Deubiquitinating enzyme 47).                                                                                                      |
| 1064 | Q96K76           | 8                    | 10             | 6.8                   | 1375   | 157268 | 5.1  | Ubiquitin carboxyl-terminal hydrolase 47                                                                                                                                                                                                                          |
| 1065 | Q96ST3           | 8                    | 13             | 6.8                   | 1273   | 145175 | 7.3  | Paired amphipathic helix protein Sin3a                                                                                                                                                                                                                            |
| 1066 | P08572           | 8                    | 26             | 6.6                   | 1712   | 167553 | 8.7  | Collagen alpha-2(IV) chain precursor [Contains: Canstatin]                                                                                                                                                                                                        |
| 1066 | UPI0000D61AA5    | 8                    | 26             | 6.6                   | 1706   | 167211 | 8.6  | Collagen alpha-2(IV) chain precursor.                                                                                                                                                                                                                             |
| 1066 | UPI0000D61AA4    | 8                    | 26             | 6.6                   | 1712   | 167607 | 8.6  | Collagen alpha-2(IV) chain precursor.                                                                                                                                                                                                                             |
| 1066 | UPI00004588A6    | 8                    | 26             | 6.6                   | 1706   | 167157 | 8.6  | Collagen alpha-2(IV) chain precursor.                                                                                                                                                                                                                             |
| 1067 | Q10570           | 8                    | 15             | 6.4                   | 1443   | 160883 | 6.4  | Cleavage and polyadenylation specificity factor subunit 1                                                                                                                                                                                                         |
| 1068 | Q6PFW2           | 8                    | 21             | 5.8                   | 1562   | 172243 | 5.5  | Rho guanine nucleotide exchange factor (GEF) 11                                                                                                                                                                                                                   |
| 1069 | P52948           | 8                    | 11             | 5.6                   | 1729   | 187789 | 6.3  | Nuclear pore complex protein Nup98-Nup96 precursor [Contains: Nuclear pore complex protein Nup98 (Nucleoporin Nup98) (98 kDa nucleoporin); Nuclear pore complex protein Nup96 (Nucleoporin Nup96) (96 kDa nucleoporin)]                                           |
| 1069 | UPI0000D62592    | 8                    | 11             | 5.6                   | 1729   | 187780 | 6.4  | Nuclear pore complex protein Nup98-Nup96 precursor [Contains: Nuclear pore complex protein Nup98 (Nucleoporin Nup98) (98 kDa nucleoporin); Nuclear pore complex protein Nup96 (Nucleoporin Nup96) (96 kDa nucleoporin)].                                          |
| 1069 | P52948-5         | 8                    | 11             | 5.4                   | 1800   | 195816 | 6.4  | Isoform 5 of P52948                                                                                                                                                                                                                                               |
| 1070 | UPI000059DBEB    | 8                    | 14             | 5.5                   | 1936   | 198175 | 7.2  | Host cell factor (HCF) (HCF-1) (C1 factor) (VP16 accessory protein) (VCAF) (CFF) [Contains: HCF N-terminal chain 1; HCF N-terminal chain 2; HCF N-terminal chain 3; HCF N-terminal chain 4; HCF N-terminal chain 5; HCF N-terminal chain 6; HCF C-terminal chain] |
| 1070 | UPI000059DBED    | 8                    | 14             | 5.4                   | 1980   | 202848 | 7.1  | Host cell factor (HCF) (HCF-1) (C1 factor) (VP16 accessory protein) (VCAF) (CFF) [Contains: HCF N-terminal chain 1; HCF N-terminal chain 2; HCF N-terminal chain 3; HCF N-terminal chain 4; HCF N-terminal chain 5; HCF N-terminal chain 6; HCF C-terminal chain] |
| 1070 | UPI000036779B    | 8                    | 14             | 5.4                   | 1966   | 201848 | 7.5  | Host cell factor (HCF) (HCF-1) (C1 factor) (VP16 accessory protein) (VCAF) (CFF) [Contains: HCF N-terminal chain 1; HCF N-terminal chain 2; HCF N-terminal chain 3; HCF N-terminal chain 4; HCF N-terminal chain 5; HCF N-terminal chain 6; HCF C-terminal chain] |
| 1070 | UPI0000142F1F    | 8                    | 14             | 5.2                   | 2035   | 208730 | 7.5  | host cell factor 1                                                                                                                                                                                                                                                |
| 1071 | Q9Y6D6           | 8                    | 22             | 5.1                   | 1849   | 208766 | 5.9  | Brefeldin A-inhibited guanine nucleotide-exchange protein 1                                                                                                                                                                                                       |
| 1072 | Q5UIP0           | 8                    | 15             | 4.7                   | 2472   | 274464 | 5.5  | Telomere-associated protein RIF1                                                                                                                                                                                                                                  |

| No.  | Accession Number | Unique Peptide Count | Spectrum Count | Sequence Coverage (%) | Length | MolWt  | pI   | Descriptive Name                                                                                                                                                                                                                                                |
|------|------------------|----------------------|----------------|-----------------------|--------|--------|------|-----------------------------------------------------------------------------------------------------------------------------------------------------------------------------------------------------------------------------------------------------------------|
| 1072 | UPI0000D6124A    | 8                    | 15             | 4.7                   | 2448   | 271915 | 5.4  | Telomere-associated protein RIF1 (Rap1-interacting factor 1 homolog).                                                                                                                                                                                           |
| 1072 | Q5UIP0-2         | 8                    | 15             | 4.7                   | 2446   | 271688 | 5.4  | Isoform 2 of Q5UIP0                                                                                                                                                                                                                                             |
| 1072 | UPI0000D61249    | 8                    | 15             | 4.6                   | 2474   | 274691 | 5.5  | Telomere-associated protein RIF1 (Rap1-interacting factor 1 homolog).                                                                                                                                                                                           |
| 1073 | UPI00004569DB    | 8                    | 11             | 4.5                   | 2036   | 233241 | 6.9  | Protein FAM38A.                                                                                                                                                                                                                                                 |
| 1073 | Q92508           | 8                    | 11             | 4.5                   | 2035   | 233040 | 6.9  | Protein FAM38A                                                                                                                                                                                                                                                  |
| 1073 | Q0KKZ9           | 8                    | 11             | 4.4                   | 2090   | 239618 | 7    | Mib                                                                                                                                                                                                                                                             |
| 1074 | Q9GZT3           | 7                    | 33             | 63.3                  | 109    | 12349  | 10.2 | SRA stem-loop-interacting RNA-binding protein, mitochondrial precursor                                                                                                                                                                                          |
| 1075 | Q99471           | 7                    | 23             | 59.7                  | 154    | 17328  | 6.3  | Prefoldin subunit 5                                                                                                                                                                                                                                             |
| 1076 | P62888           | 7                    | 100            | 59.1                  | 115    | 12784  | 9.6  | 60S ribosomal protein L30                                                                                                                                                                                                                                       |
| 1077 | Q9Y3E5           | 7                    | 14             | 57                    | 179    | 19194  | 8.7  | Peptidyl-tRNA hydrolase 2, mitochondrial precursor                                                                                                                                                                                                              |
| 1078 | Q9BYN0           | 7                    | 19             | 56.9                  | 137    | 14259  | 8.2  | Sulfiredoxin-1                                                                                                                                                                                                                                                  |
| 1079 | Q9Y221           | 7                    | 11             | 56.1                  | 180    | 20463  | 8.5  | 60S ribosome subunit biogenesis protein NIP7 homolog                                                                                                                                                                                                            |
| 1080 | Q9UHV9           | 7                    | 34             | 54.5                  | 154    | 16648  | 6.6  | Prefoldin subunit 2                                                                                                                                                                                                                                             |
| 1081 | P61088           | 7                    | 36             | 53.3                  | 152    | 17138  | 6.6  | Ubiquitin-conjugating enzyme E2 N                                                                                                                                                                                                                               |
| 1082 | Q53HV6           | 7                    | 54             | 51.7                  | 151    | 16584  | 7.7  | Niemann-Pick disease, type C2 variant                                                                                                                                                                                                                           |
| 1083 | P10599           | 7                    | 110            | 51.4                  | 105    | 11737  | 4.9  | Thioredoxin                                                                                                                                                                                                                                                     |
| 1084 | P67809           | 7                    | 46             | 50.9                  | 324    | 35924  | 9.9  | Nuclease sensitive element-binding protein 1                                                                                                                                                                                                                    |
| 1085 | Q04837           | 7                    | 44             | 50                    | 148    | 17260  | 9.6  | Single-stranded DNA-binding protein, mitochondrial precursor                                                                                                                                                                                                    |
| 1085 | Q567R6           | 7                    | 44             | 50                    | 148    | 17359  | 9.7  | Single-stranded DNA binding protein 1                                                                                                                                                                                                                           |
| 1086 | P16949           | 7                    | 74             | 48.3                  | 149    | 17302  | 6    | Stathmin                                                                                                                                                                                                                                                        |
| 1087 | P61006           | 7                    | 17             | 48.3                  | 207    | 23668  | 9.1  | Ras-related protein Rab-8A                                                                                                                                                                                                                                      |
| 1088 | Q03135           | 7                    | 159            | 47.2                  | 178    | 20472  | 6    | Caveolin-1                                                                                                                                                                                                                                                      |
| 1089 | P11441           | 7                    | 12             | 47.1                  | 157    | 17776  | 8.7  | Ubiquitin-like protein 4A                                                                                                                                                                                                                                       |
| 1090 | Q15185           | 7                    | 47             | 46.9                  | 160    | 18697  | 4.5  | Prostaglandin E synthase 3                                                                                                                                                                                                                                      |
| 1091 | O75828           | 7                    | 12             | 46.6                  | 277    | 30850  | 6.2  | Carbonyl reductase [NADPH] 3                                                                                                                                                                                                                                    |
| 1092 | P61326           | 7                    | 27             | 46.6                  | 146    | 17164  | 6.1  | Protein mago nashi homolog                                                                                                                                                                                                                                      |
| 1092 | Q96A72           | 7                    | 27             | 45.9                  | 148    | 17276  | 6.4  | Protein mago nashi homolog 2                                                                                                                                                                                                                                    |
| 1093 | Q96DE0           | 7                    | 11             | 45.6                  | 195    | 21273  | 6.9  | Nucleoside diphosphate-linked moiety X motif 16                                                                                                                                                                                                                 |
| 1094 | Q9NRV9           | 7                    | 24             | 45.5                  | 189    | 21097  | 5.8  | Heme-binding protein 1                                                                                                                                                                                                                                          |
| 1095 | P61224           | 7                    | 35             | 45.1                  | 184    | 20825  | 5.8  | Ras-related protein Rap-1b precursor                                                                                                                                                                                                                            |
| 1096 | P30044           | 7                    | 38             | 44.4                  | 214    | 22026  | 8.6  | Peroxiredoxin-5, mitochondrial precursor                                                                                                                                                                                                                        |
| 1096 | UPI000013D62C    | 7                    | 38             | 44.4                  | 214    | 22086  | 8.7  | Peroxiredoxin-5, mitochondrial precursor (EC 1.11.1.15) (Prx-V) (Peroxisomal antioxidant enzyme) (PLP) (Thioredoxin reductase) (Thioredoxin peroxidase PMP20) (Antioxidant enzyme B166) (AOEB166) (TPx type VI) (Liver tissue 2D-page spot 71B) (Alu corepresso |
| 1097 | Q4VBQ4           | 7                    | 29             | 43.6                  | 140    | 15088  | 6.1  | Profilin 2                                                                                                                                                                                                                                                      |
| 1098 | P25398           | 7                    | 42             | 43.2                  | 132    | 14526  | 6.7  | 40S ribosomal protein S12                                                                                                                                                                                                                                       |
| 1099 | O75223           | 7                    | 21             | 42.6                  | 188    | 21008  | 5.1  | Uncharacterized protein C7orf24                                                                                                                                                                                                                                 |
| 1100 | Q07020           | 7                    | 93             | 42                    | 188    | 21634  | 11.7 | 60S ribosomal protein L18                                                                                                                                                                                                                                       |
| 1101 | P37108           | 7                    | 35             | 41.9                  | 136    | 14570  | 10   | Signal recognition particle 14 kDa protein                                                                                                                                                                                                                      |
| 1101 | Q96Q14           | 7                    | 35             | 41.9                  | 136    | 14514  | 10   | Signal recognition particle 14kD                                                                                                                                                                                                                                |
| 1102 | P13073           | 7                    | 64             | 41.4                  | 169    | 19577  | 9.5  | Cytochrome c oxidase subunit 4 isoform 1, mitochondrial precursor                                                                                                                                                                                               |
| 1102 | Q6P666           | 7                    | 64             | 41.4                  | 169    | 19607  | 9.5  | Cytochrome c oxidase subunit IV isoform 1                                                                                                                                                                                                                       |
| 1103 | Q9NR31           | 7                    | 14             | 41.4                  | 198    | 22367  | 6.7  | GTP-binding protein SAR1a                                                                                                                                                                                                                                       |
| 1104 | Q9BPX5           | 7                    | 18             | 41.2                  | 153    | 16941  | 6.6  | Actin-related protein 2/3 complex subunit 5-like protein                                                                                                                                                                                                        |
| 1105 | Q9UL26           | 7                    | 17             | 40.7                  | 194    | 21855  | 8.2  | Ras-related protein Rab-22A                                                                                                                                                                                                                                     |
| 1106 | O75396           | 7                    | 98             | 40.5                  | 215    | 24741  | 8.5  | Vesicle-trafficking protein SEC22b                                                                                                                                                                                                                              |
| 1107 | Q9GZS3           | 7                    | 13             | 40                    | 305    | 33581  | 5.5  | WD repeat protein 61                                                                                                                                                                                                                                            |
| 1108 | P19387           | 7                    | 12             | 39.6                  | 275    | 31441  | 4.9  | DNA-directed RNA polymerase II 33 kDa polypeptide                                                                                                                                                                                                               |
| 1109 | P01111           | 7                    | 16             | 39.2                  | 189    | 21229  | 5.2  | GTPase NRas precursor                                                                                                                                                                                                                                           |
| 1110 | UPI0000456547    | 7                    | 30             | 39.3                  | 224    | 24849  | 8.5  | Signal peptidase complex subunit 2 (EC 3.4.-.-) (Microsomal signal peptidase 25 kDa subunit) (SPase 25 kDa subunit).                                                                                                                                            |
| 1110 | Q15005           | 7                    | 30             | 38.9                  | 226    | 25003  | 8.5  | Signal peptidase complex subunit 2                                                                                                                                                                                                                              |
| 1110 | UPI000047EFF7    | 7                    | 30             | 38.9                  | 226    | 24976  | 8    | hypothetical protein LOC653566                                                                                                                                                                                                                                  |
| 1111 | Q9HAV7           | 7                    | 13             | 38.2                  | 217    | 24279  | 8.1  | GrpE protein homolog 1, mitochondrial precursor                                                                                                                                                                                                                 |
| 1112 | Q567R9           | 7                    | 14             | 53.3                  | 150    | 16830  | 9.7  | CIP29 protein                                                                                                                                                                                                                                                   |
| 1112 | P82979           | 7                    | 14             | 38.1                  | 210    | 23671  | 6.4  | Nuclear protein Hcc-1                                                                                                                                                                                                                                           |
| 1113 | UPI000015B7BA    | 7                    | 15             | 38.1                  | 210    | 24611  | 6    | DNA directed RNA polymerase II polypeptide E                                                                                                                                                                                                                    |
| 1114 | P13693           | 7                    | 52             | 37.2                  | 172    | 19595  | 4.9  | Translationally-controlled tumor protein                                                                                                                                                                                                                        |
| 1115 | Q9UHY7           | 7                    | 18             | 37.2                  | 261    | 28933  | 4.8  | Enolase-phosphatase E1                                                                                                                                                                                                                                          |
| 1116 | Q9Y296           | 7                    | 13             | 37                    | 219    | 24340  | 6.2  | Trafficking protein particle complex subunit 4                                                                                                                                                                                                                  |
| 1117 | Q9NRX1           | 7                    | 16             | 36.9                  | 252    | 27924  | 9.7  | RNA-binding protein PNO1                                                                                                                                                                                                                                        |
| 1118 | P41227           | 7                    | 18             | 36.2                  | 235    | 26458  | 5.6  | N-terminal acetyltransferase complex ARD1 subunit homolog A                                                                                                                                                                                                     |
| 1119 | UPI0000EFE339    | 7                    | 26             | 36.7                  | 180    | 20639  | 7.8  | NEDD8-conjugating enzyme Ubc12                                                                                                                                                                                                                                  |
| 1119 | P61081           | 7                    | 26             | 36.1                  | 183    | 20900  | 7.7  | NEDD8-conjugating enzyme Ubc12                                                                                                                                                                                                                                  |
| 1120 | P63000           | 7                    | 35             | 39.1                  | 192    | 21450  | 8.5  | Ras-related C3 botulinum toxin substrate 1 precursor                                                                                                                                                                                                            |
| 1120 | A4D2P0           | 7                    | 35             | 35.5                  | 211    | 23467  | 8.6  | Ras-related C3 botulinum toxin substrate 1                                                                                                                                                                                                                      |

| No.  | Accession Number | Unique Peptide Count | Spectrum Count | Sequence Coverage (%) | Length | MolWt | pI   | Descriptive Name                                                                                                                                                                                  |
|------|------------------|----------------------|----------------|-----------------------|--------|-------|------|---------------------------------------------------------------------------------------------------------------------------------------------------------------------------------------------------|
| 1121 | Q8NFH5           | 7                    | 9              | 35.3                  | 326    | 34774 | 9.1  | Nucleoporin NUP53                                                                                                                                                                                 |
| 1122 | Q8VWV59          | 7                    | 10             | 35.3                  | 207    | 23098 | 6.9  | SPRY domain-containing protein 4                                                                                                                                                                  |
| 1122 | UPI00001418EE    | 7                    | 10             | 35.3                  | 207    | 23129 | 6.9  | SPRY domain-containing protein 4.                                                                                                                                                                 |
| 1123 | P49755           | 7                    | 107            | 35.2                  | 219    | 24976 | 7.5  | Transmembrane emp24 domain-containing protein 10 precursor                                                                                                                                        |
| 1123 | Q53GF9           | 7                    | 107            | 34.2                  | 225    | 25637 | 6.7  | Full-length cDNA 5-PRIME end of clone CS0DF013YM24 of Fetal brain of Homo sapiens (Human) variant                                                                                                 |
| 1124 | O43447           | 7                    | 10             | 35                    | 177    | 19208 | 8.1  | Peptidyl-prolyl cis-trans isomerase H                                                                                                                                                             |
| 1125 | Q15404           | 7                    | 11             | 35                    | 277    | 31540 | 8.6  | Ras suppressor protein 1                                                                                                                                                                          |
| 1125 | Q32Q10           | 7                    | 11             | 34.6                  | 280    | 31359 | 9.1  | RSU1 protein                                                                                                                                                                                      |
| 1126 | P06730           | 7                    | 12             | 33.6                  | 217    | 25097 | 6.1  | Eukaryotic translation initiation factor 4E                                                                                                                                                       |
| 1126 | Q32Q75           | 7                    | 12             | 33.6                  | 217    | 25067 | 6.1  | Eukaryotic translation initiation factor 4E                                                                                                                                                       |
| 1127 | Q08257           | 7                    | 8              | 33.4                  | 329    | 35207 | 8.4  | Quinone oxidoreductase                                                                                                                                                                            |
| 1128 | P26373           | 7                    | 65             | 33.2                  | 211    | 24261 | 11.7 | 60S ribosomal protein L13                                                                                                                                                                         |
| 1128 | Q6NZ55           | 7                    | 65             | 33.2                  | 211    | 24265 | 11.7 | Ribosomal protein L13                                                                                                                                                                             |
| 1129 | Q541A5           | 7                    | 12             | 33.2                  | 307    | 34500 | 6.7  | Ubiquitin fusion degradation 1-like                                                                                                                                                               |
| 1129 | Q92890           | 7                    | 12             | 29.7                  | 343    | 38725 | 6.3  | Ubiquitin fusion degradation protein 1 homolog                                                                                                                                                    |
| 1130 | O00151           | 7                    | 9              | 33.1                  | 329    | 36072 | 7    | PDZ and LIM domain protein 1                                                                                                                                                                      |
| 1131 | Q03405           | 7                    | 14             | 32.8                  | 335    | 36978 | 6.6  | Urokinase plasminogen activator surface receptor precursor                                                                                                                                        |
| 1132 | Q53G42           | 7                    | 14             | 32.3                  | 337    | 38610 | 6.4  | MRNA decapping enzyme variant                                                                                                                                                                     |
| 1132 | Q96C86           | 7                    | 14             | 32.3                  | 337    | 38609 | 6.4  | Scavenger mRNA-decapping enzyme DcpS                                                                                                                                                              |
| 1133 | Q13242           | 7                    | 16             | 32.1                  | 221    | 25542 | 8.6  | Splicing factor, arginine/serine-rich 9                                                                                                                                                           |
| 1134 | Q9UKD2           | 7                    | 20             | 31.8                  | 239    | 27560 | 8.3  | mRNA turnover protein 4 homolog                                                                                                                                                                   |
| 1135 | Q5T3I2           | 7                    | 12             | 31.2                  | 288    | 31675 | 7.7  | Apolipoprotein A-I-binding protein                                                                                                                                                                |
| 1135 | Q8NCW5           | 7                    | 12             | 31.2                  | 288    | 31689 | 7.7  | ApoA-I binding protein precursor                                                                                                                                                                  |
| 1136 | O60762           | 7                    | 22             | 30.8                  | 260    | 29634 | 9.6  | Dolichol-phosphate mannosyltransferase                                                                                                                                                            |
| 1136 | Q5QPK2           | 7                    | 22             | 27.9                  | 287    | 32426 | 9.1  | Dolichyl-phosphate mannosyltransferase polypeptide 1, catalytic subunit                                                                                                                           |
| 1136 | Q5QPK0           | 7                    | 22             | 27.2                  | 294    | 33218 | 9.1  | Dolichyl-phosphate mannosyltransferase polypeptide 1, catalytic subunit                                                                                                                           |
| 1137 | P30040           | 7                    | 19             | 30.7                  | 261    | 28993 | 7.3  | Endoplasmic reticulum protein ERp29 precursor                                                                                                                                                     |
| 1138 | Q5VYD7           | 7                    | 9              | 33.7                  | 252    | 28491 | 4.9  | HCLS1 associated protein X-1                                                                                                                                                                      |
| 1138 | O00165           | 7                    | 9              | 30.5                  | 279    | 31621 | 4.9  | HS1-associating protein X-1                                                                                                                                                                       |
| 1139 | P62917           | 7                    | 62             | 30.4                  | 257    | 28025 | 11   | 60S ribosomal protein L8                                                                                                                                                                          |
| 1140 | Q9GZZ9           | 7                    | 10             | 30                    | 404    | 44863 | 4.8  | Ubiquitin-activating enzyme E1 domain-containing protein 1                                                                                                                                        |
| 1141 | Q01105-2         | 7                    | 35             | 29.6                  | 277    | 32103 | 4.2  | Isoform 2 of Q01105                                                                                                                                                                               |
| 1141 | UPI0000161B37    | 7                    | 35             | 29.6                  | 277    | 32134 | 4.2  | SET translocation (myeloid leukemia-associated)                                                                                                                                                   |
| 1142 | Q9UBP9           | 7                    | 12             | 29.6                  | 304    | 34490 | 7.9  | GULP engulfment adaptor PTB domain-containing protein 1                                                                                                                                           |
| 1143 | P13984           | 7                    | 7              | 28.5                  | 249    | 28380 | 9.2  | Transcription initiation factor IIF subunit beta                                                                                                                                                  |
| 1143 | UPI00004566E9    | 7                    | 7              | 28.4                  | 250    | 28473 | 9.3  | Transcription initiation factor IIF subunit beta (EC 3.6.1.-) (TFIIF- beta) (ATP-dependent helicase GTF2F2) (General transcription factor IIF subunit 2) (Transcription initiation factor RAP30). |
| 1144 | UPI0000456411    | 7                    | 53             | 30.7                  | 238    | 25889 | 7.8  | Thioredoxin-dependent peroxide reductase, mitochondrial precursor (EC 1.11.1.15) (Peroxiredoxin-3) (PRX III) (Antioxidant protein 1) (AOP-1) (Protein MER5 homolog) (HBC189).                     |
| 1144 | UPI00001B216B    | 7                    | 53             | 30.7                  | 238    | 25839 | 7.5  | peroxiredoxin 3 isoform b                                                                                                                                                                         |
| 1144 | P30048           | 7                    | 53             | 28.5                  | 256    | 27693 | 7.8  | Thioredoxin-dependent peroxide reductase, mitochondrial precursor                                                                                                                                 |
| 1145 | Q9BY43           | 7                    | 8              | 28.4                  | 222    | 25098 | 4.7  | Charged multivesicular body protein 4a                                                                                                                                                            |
| 1146 | O76071           | 7                    | 8              | 28                    | 339    | 37840 | 5    | Protein CIAO1                                                                                                                                                                                     |
| 1147 | O94905           | 7                    | 18             | 28                    | 339    | 37840 | 5.6  | SPFH domain-containing protein 2 precursor                                                                                                                                                        |
| 1148 | Q8NB7            | 7                    | 19             | 27.9                  | 301    | 33857 | 8    | Sulfatase-modifying factor 2 precursor                                                                                                                                                            |
| 1148 | UPI000013E405    | 7                    | 19             | 27.9                  | 301    | 33843 | 8    | Sulfatase-modifying factor 2 precursor (C-alpha-formylglycine- generating enzyme 2).                                                                                                              |
| 1148 | UPI0000DAC779    | 7                    | 19             | 27.6                  | 304    | 34290 | 8.4  | sulfatase modifying factor 2 isoform a precursor                                                                                                                                                  |
| 1149 | Q8NFV4-4         | 7                    | 17             | 28.6                  | 308    | 33863 | 9.2  | Isoform 4 of Q8NFV4                                                                                                                                                                               |
| 1149 | Q8NFV4           | 7                    | 17             | 27.9                  | 315    | 34690 | 9.5  | Abhydrolase domain-containing protein 11                                                                                                                                                          |
| 1150 | O75937           | 7                    | 9              | 27.7                  | 253    | 29842 | 9.1  | DnaJ homolog subfamily C member 8                                                                                                                                                                 |
| 1150 | UPI0000456194    | 7                    | 9              | 26.6                  | 263    | 30829 | 8.9  | DnaJ homolog subfamily C member 8 (Splicing protein spf31).                                                                                                                                       |
| 1151 | O00273           | 7                    | 10             | 27.5                  | 331    | 36522 | 4.8  | DNA fragmentation factor subunit alpha                                                                                                                                                            |
| 1151 | Q53HN4           | 7                    | 10             | 27.5                  | 331    | 36594 | 4.8  | DNAation factor, 45kDa, alpha polypeptide isoform 1 variant                                                                                                                                       |
| 1152 | Q9UBE0           | 7                    | 21             | 27.5                  | 346    | 38450 | 5.3  | SUMO-activating enzyme subunit 1                                                                                                                                                                  |
| 1153 | O96008           | 7                    | 10             | 27.4                  | 361    | 37893 | 7.3  | Probable mitochondrial import receptor subunit TOM40 homolog                                                                                                                                      |
| 1154 | P46926           | 7                    | 18             | 27.3                  | 289    | 32668 | 6.9  | Glucosamine-6-phosphate isomerase                                                                                                                                                                 |
| 1155 | O00170           | 7                    | 10             | 27                    | 330    | 37664 | 6.5  | AH receptor-interacting protein                                                                                                                                                                   |
| 1156 | Q9H8Y8           | 7                    | 13             | 27                    | 452    | 47145 | 4.8  | Golgi reassembly-stacking protein 2                                                                                                                                                               |
| 1157 | Q92905           | 7                    | 12             | 26.6                  | 334    | 37579 | 6.5  | COP9 signalosome complex subunit 5                                                                                                                                                                |
| 1158 | P82650           | 7                    | 13             | 26.4                  | 360    | 41280 | 7.9  | Mitochondrial 28S ribosomal protein S22                                                                                                                                                           |
| 1159 | P53367           | 7                    | 9              | 26.3                  | 373    | 41738 | 6.7  | Arfaptin-1                                                                                                                                                                                        |
| 1160 | Q53Y37           | 7                    | 17             | 26.1                  | 211    | 23181 | 4.7  | Clathrin, light polypeptide                                                                                                                                                                       |

| No.  | Accession Number | Unique Peptide Count | Spectrum Count | Sequence Coverage (%) | Length | MolWt  | pI  | Descriptive Name                                                                                                                |
|------|------------------|----------------------|----------------|-----------------------|--------|--------|-----|---------------------------------------------------------------------------------------------------------------------------------|
| 1161 | P31942-3         | 7                    | 33             | 30                    | 297    | 31525  | 7.3 | Isoform 3 of P31942                                                                                                             |
| 1161 | P31942-2         | 7                    | 33             | 26.9                  | 331    | 35239  | 6.9 | Isoform 2 of P31942                                                                                                             |
| 1161 | P31942           | 7                    | 33             | 25.7                  | 346    | 36926  | 6.9 | Heterogeneous nuclear ribonucleoprotein H3                                                                                      |
| 1161 | Q53F48           | 7                    | 33             | 25.7                  | 346    | 36926  | 7.4 | Heterogeneous nuclear ribonucleoprotein H3 isoform a variant                                                                    |
| 1162 | Q95861           | 7                    | 10             | 25.6                  | 308    | 33392  | 5.7 | 3'(2'),5'-bisphosphate nucleotidase 1                                                                                           |
| 1163 | Q6FHU0           | 7                    | 11             | 25.4                  | 272    | 29696  | 5.8 | PSMB8 protein                                                                                                                   |
| 1163 | Q5JNW6           | 7                    | 11             | 25.4                  | 272    | 29770  | 5.8 | Proteasome subunit beta type                                                                                                    |
| 1163 | P28062           | 7                    | 11             | 25                    | 276    | 30354  | 7.8 | Proteasome subunit beta type 8 precursor                                                                                        |
| 1163 | Q5QNR8           | 7                    | 11             | 25                    | 276    | 30354  | 7.4 | Proteasome subunit beta type                                                                                                    |
| 1164 | Q96D15           | 7                    | 19             | 25                    | 328    | 37493  | 4.9 | Reticulocalbin-3 precursor                                                                                                      |
| 1165 | P14550           | 7                    | 13             | 24.6                  | 325    | 36573  | 6.8 | Alcohol dehydrogenase [NADP+]                                                                                                   |
| 1166 | Q05048           | 7                    | 12             | 24.6                  | 431    | 48358  | 6.6 | Cleavage stimulation factor 50 kDa subunit                                                                                      |
| 1167 | Q16543           | 7                    | 25             | 24.6                  | 378    | 44468  | 5.2 | Hsp90 co-chaperone Cdc37                                                                                                        |
| 1168 | P18754           | 7                    | 16             | 24.2                  | 421    | 44969  | 7.5 | Regulator of chromosome condensation                                                                                            |
| 1168 | UPI0000E26242    | 7                    | 16             | 23.3                  | 438    | 46753  | 8.1 | regulator of chromosome condensation 1 isoform b                                                                                |
| 1168 | Q6NT97           | 7                    | 16             | 22.6                  | 452    | 48146  | 8.2 | Regulator of chromosome condensation 1                                                                                          |
| 1169 | Q9Y305           | 7                    | 13             | 23.6                  | 406    | 46355  | 8   | Acyl-coenzyme A thioesterase 9                                                                                                  |
| 1169 | UPI0000D61D39    | 7                    | 13             | 22.1                  | 434    | 49270  | 8.3 | Acyl-coenzyme A thioesterase 9 (EC 3.1.2.-) (Acyl-CoA thioesterase 9) (Acyl-CoA thioester hydrolase 9).                         |
| 1169 | UPI000013F264    | 7                    | 13             | 21.9                  | 439    | 49902  | 8.6 | acyl-Coenzyme A thioesterase 2, mitochondrial isoform b                                                                         |
| 1169 | UPI0000D61D38    | 7                    | 13             | 21.6                  | 445    | 50474  | 8.4 | Acyl-coenzyme A thioesterase 9 (EC 3.1.2.-) (Acyl-CoA thioesterase 9) (Acyl-CoA thioester hydrolase 9).                         |
| 1169 | UPI00003D7D31    | 7                    | 13             | 21.4                  | 448    | 50851  | 8.5 | acyl-Coenzyme A thioesterase 2, mitochondrial isoform a                                                                         |
| 1170 | Q53FE8           | 7                    | 8              | 23.5                  | 370    | 40572  | 5.1 | P47 protein isoform a variant                                                                                                   |
| 1170 | Q9UNZ2           | 7                    | 8              | 23.5                  | 370    | 40573  | 5.1 | NSFL1 cofactor p47                                                                                                              |
| 1170 | Q5JXA5           | 7                    | 8              | 23.4                  | 372    | 40816  | 5.1 | NSFL1 (P97) cofactor                                                                                                            |
| 1171 | UPI000006FDB9    | 7                    | 11             | 23.7                  | 397    | 41296  | 6.7 | acetyl-Coenzyme A acetyltransferase 2                                                                                           |
| 1171 | Q9BWD1           | 7                    | 11             | 23.7                  | 397    | 41351  | 6.9 | Acetyl-CoA acetyltransferase, cytosolic                                                                                         |
| 1171 | Q59GW6           | 7                    | 11             | 23.3                  | 404    | 42136  | 7.4 | Acetyl-CoA acetyltransferase, cytosolic variant                                                                                 |
| 1172 | P50502           | 7                    | 25             | 23                    | 369    | 41332  | 5.3 | Hsc70-interacting protein                                                                                                       |
| 1173 | P68400           | 7                    | 13             | 22.8                  | 391    | 45144  | 7.7 | Casein kinase II subunit alpha                                                                                                  |
| 1173 | UPI0000D61015    | 7                    | 13             | 22.5                  | 395    | 45682  | 7.9 | Casein kinase II subunit alpha (EC 2.7.11.1) (CK II).                                                                           |
| 1173 | Q5U5J2           | 7                    | 13             | 22.4                  | 397    | 45909  | 7.9 | CSNK2A1 protein                                                                                                                 |
| 1174 | P23258           | 7                    | 8              | 22.6                  | 451    | 51170  | 6.1 | Tubulin gamma-1 chain                                                                                                           |
| 1175 | Q9Y570           | 7                    | 8              | 22                    | 386    | 42315  | 6   | Protein phosphatase methylesterase 1                                                                                            |
| 1175 | UPI0000D62652    | 7                    | 8              | 21.9                  | 389    | 42669  | 5.8 | Protein phosphatase methylesterase 1 (EC 3.1.1.-) (PME-1).                                                                      |
| 1176 | Q96EP5           | 7                    | 16             | 21.9                  | 407    | 43383  | 8.6 | DAZ-associated protein 1                                                                                                        |
| 1177 | Q99747           | 7                    | 7              | 21.8                  | 312    | 34746  | 5.4 | Gamma-soluble NSF attachment protein                                                                                            |
| 1177 | UPI0000456B5E    | 7                    | 7              | 21.8                  | 312    | 34920  | 5.2 | Gamma-soluble NSF attachment protein (SNAP-gamma) (N-ethylmaleimide-sensitive factor attachment protein, gamma).                |
| 1178 | Q96HC5           | 7                    | 16             | 21.9                  | 471    | 53121  | 9.1 | U2 small nuclear RNA auxiliary factor 2                                                                                         |
| 1178 | P26368           | 7                    | 16             | 21.7                  | 475    | 53501  | 9.1 | Splicing factor U2AF 65 kDa subunit (U2 auxiliary factor 65 kDa subunit) (U2 snRNP auxiliary factor large subunit) (hU2AF(65))  |
| 1178 | UPI0000D6181E    | 7                    | 16             | 21.6                  | 477    | 53728  | 9.2 | Splicing factor U2AF 65 kDa subunit (U2 auxiliary factor 65 kDa subunit) (U2 snRNP auxiliary factor large subunit) (hU2AF(65)). |
| 1179 | Q9UM22           | 7                    | 36             | 33                    | 224    | 25437  | 6.7 | Mammalian ependymin-related protein 1 precursor                                                                                 |
| 1179 | A4D1W8           | 7                    | 36             | 21.5                  | 344    | 38151  | 9.6 | Upregulated in colorectal cancer gene 1                                                                                         |
| 1179 | Q96J80           | 7                    | 36             | 21.5                  | 344    | 38141  | 9.6 | Mammalian ependymin related protein 1                                                                                           |
| 1180 | O43237           | 7                    | 12             | 21.3                  | 492    | 54099  | 6.4 | Cytoplasmic dynein 1 light intermediate chain 2                                                                                 |
| 1181 | Q15645           | 7                    | 8              | 20.6                  | 432    | 48551  | 6.1 | Thyroid receptor-interacting protein 13                                                                                         |
| 1182 | P51570           | 7                    | 11             | 20.4                  | 392    | 42272  | 6.5 | Galactokinase                                                                                                                   |
| 1183 | Q53GI0           | 7                    | 15             | 20.2                  | 420    | 46337  | 7.2 | GDP-mannose pyrophosphorylase A                                                                                                 |
| 1183 | Q9NWC3           | 7                    | 15             | 20.2                  | 420    | 46351  | 7.2 | CDNA FLJ10137 fis, clone HEMBA1003136, weakly similar to MANNOSE-1- PHOSPHATE GUANYLTRANSFERASE                                 |
| 1183 | Q96IJ6           | 7                    | 15             | 20.2                  | 420    | 46291  | 7.2 | GDP-mannose pyrophosphorylase A                                                                                                 |
| 1184 | Q9P0V9-2         | 7                    | 13             | 22.2                  | 454    | 52593  | 6.8 | Isoform 2 of Q9P0V9                                                                                                             |
| 1184 | Q86VP5           | 7                    | 13             | 19.9                  | 507    | 58579  | 7.5 | SEPT10 protein                                                                                                                  |
| 1184 | UPI0000456E33    | 7                    | 13             | 19.5                  | 519    | 60191  | 6.9 | Septin-10.                                                                                                                      |
| 1184 | Q9P0V9           | 7                    | 13             | 19.5                  | 517    | 59982  | 7.1 | Septin-10                                                                                                                       |
| 1184 | UPI0000D61215    | 7                    | 13             | 18.5                  | 547    | 63282  | 6.8 | Septin-10.                                                                                                                      |
| 1185 | Q9HAB8           | 7                    | 7              | 19.9                  | 311    | 34005  | 6.7 | Phosphopantothenate--cysteine ligase                                                                                            |
| 1186 | UPI0000F0A4F3    | 7                    | 12             | 25.9                  | 336    | 37229  | 6.5 | C-terminal-binding protein 2                                                                                                    |
| 1186 | P56545           | 7                    | 12             | 19.6                  | 445    | 48945  | 6.9 | C-terminal-binding protein 2                                                                                                    |
| 1186 | Q86SV0           | 7                    | 12             | 19.6                  | 445    | 48933  | 6.9 | CTBP2 protein                                                                                                                   |
| 1186 | Q5SQP8           | 7                    | 12             | 17                    | 513    | 56102  | 7   | C-terminal binding protein 2                                                                                                    |
| 1186 | Q5SQP7           | 7                    | 12             | 8.8                   | 985    | 106187 | 8   | C-terminal binding protein 2                                                                                                    |
| 1187 | P49821-2         | 7                    | 9              | 19.6                  | 455    | 49868  | 8.2 | Isoform 2 of P49821                                                                                                             |
| 1187 | P49821           | 7                    | 9              | 19.2                  | 464    | 50817  | 8.2 | NADH dehydrogenase [ubiquinone] flavoprotein 1, mitochondrial precursor                                                         |

| No.  | Accession Number | Unique Peptide Count | Spectrum Count | Sequence Coverage (%) | Length | MolWt | pI  | Descriptive Name                                                                                                                                                                                                                                         |
|------|------------------|----------------------|----------------|-----------------------|--------|-------|-----|----------------------------------------------------------------------------------------------------------------------------------------------------------------------------------------------------------------------------------------------------------|
| 1188 | Q5T6J5           | 7                    | 14             | 19.1                  | 561    | 59220 | 5.1 | Ubiquilin 1                                                                                                                                                                                                                                              |
| 1188 | Q9UMX0           | 7                    | 14             | 18.2                  | 589    | 62519 | 5.1 | Ubiquilin-1                                                                                                                                                                                                                                              |
| 1189 | Q9NZN4           | 7                    | 21             | 19                    | 543    | 61161 | 6.5 | EH domain-containing protein 2                                                                                                                                                                                                                           |
| 1190 | P52594-2         | 7                    | 10             | 20.3                  | 522    | 54182 | 8.9 | Isoform 2 of P52594                                                                                                                                                                                                                                      |
| 1190 | P52594           | 7                    | 10             | 18.9                  | 562    | 58260 | 8.6 | Nucleoporin-like protein RIP                                                                                                                                                                                                                             |
| 1190 | P52594-3         | 7                    | 10             | 18.9                  | 560    | 58132 | 8.6 | Isoform 3 of P52594                                                                                                                                                                                                                                      |
| 1191 | Q9HCJ6           | 7                    | 13             | 18.9                  | 419    | 45899 | 5.1 | Probable oxidoreductase KIAA1576                                                                                                                                                                                                                         |
| 1192 | P61201           | 7                    | 7              | 18.7                  | 443    | 51597 | 5.5 | COP9 signalosome complex subunit 2                                                                                                                                                                                                                       |
| 1192 | Q53HJ0           | 7                    | 7              | 18.7                  | 443    | 51570 | 5.5 | COP9 constitutive photomorphogenic homolog subunit 2 variant                                                                                                                                                                                             |
| 1192 | Q59EL2           | 7                    | 7              | 18.4                  | 451    | 52533 | 5.5 | COP9 constitutive photomorphogenic homolog subunit 2 variant                                                                                                                                                                                             |
| 1192 | Q3V3N6           | 7                    | 7              | 18.4                  | 450    | 52405 | 5.5 | 16 days neonate thymus cDNA, RIKEN full-length enriched library, clone:A130047E19 product:COP9 (constitutive photomorphogenic) homolog, subunit 2 (Arabidopsis thaliana), full insert sequence (COP9 (Constitutive photomorphogenic) homolog, subunit 2) |
| 1192 | UPI00006D3674    | 7                    | 7              | 18.3                  | 453    | 52737 | 5.5 | COP9 signalosome complex subunit 2 (Signalosome subunit 2) (SGN2) (JAB1-containing signalosome subunit 2) (Thyroid receptor-interacting protein 15) (Alien homolog).                                                                                     |
| 1193 | Q96CS3           | 7                    | 11             | 18.4                  | 445    | 52624 | 5.6 | UBX domain-containing protein 8                                                                                                                                                                                                                          |
| 1194 | Q16630-3         | 7                    | 23             | 21.1                  | 478    | 52326 | 6.4 | Isoform 3 of Q16630                                                                                                                                                                                                                                      |
| 1194 | Q16630           | 7                    | 23             | 18.3                  | 551    | 59210 | 7.2 | Cleavage and polyadenylation specificity factor 6                                                                                                                                                                                                        |
| 1194 | UPI000006D566    | 7                    | 23             | 18.3                  | 551    | 59209 | 7.4 | cleavage and polyadenylation specific factor 6, 68 kD subunit                                                                                                                                                                                            |
| 1194 | Q16630-2         | 7                    | 23             | 17.2                  | 588    | 63471 | 7.7 | Isoform 2 of Q16630                                                                                                                                                                                                                                      |
| 1195 | Q9BZZ5-3         | 7                    | 20             | 24.7                  | 373    | 42020 | 4.8 | Isoform 3 of Q9BZZ5                                                                                                                                                                                                                                      |
| 1195 | Q9BZZ5-4         | 7                    | 20             | 18.4                  | 500    | 56099 | 5.9 | Isoform 4 of Q9BZZ5                                                                                                                                                                                                                                      |
| 1195 | Q5R644           | 7                    | 20             | 18.3                  | 504    | 56770 | 5.9 | Apoptosis inhibitor 5                                                                                                                                                                                                                                    |
| 1195 | Q9BZZ5           | 7                    | 20             | 18                    | 510    | 57561 | 6.1 | Apoptosis inhibitor 5                                                                                                                                                                                                                                    |
| 1195 | UPI0000D625E5    | 7                    | 20             | 17.7                  | 521    | 58472 | 7.3 | Apoptosis inhibitor 5 (API-5) (Fibroblast growth factor 2-interacting factor) (FIF) (Protein XAGL) (Antiapoptosis clone 11 protein) (AAC- 11).                                                                                                           |
| 1196 | Q9Y6I3-3         | 7                    | 12             | 18.4                  | 550    | 57504 | 4.9 | Isoform 3 of Q9Y6I3                                                                                                                                                                                                                                      |
| 1196 | Q9Y6I3           | 7                    | 12             | 18.3                  | 551    | 57575 | 4.9 | Epsin-1                                                                                                                                                                                                                                                  |
| 1196 | Q9Y6I3-2         | 7                    | 12             | 17.5                  | 576    | 60293 | 4.8 | Isoform 2 of Q9Y6I3                                                                                                                                                                                                                                      |
| 1197 | O75312           | 7                    | 12             | 17.9                  | 459    | 50925 | 4.7 | Zinc-finger protein ZPR1                                                                                                                                                                                                                                 |
| 1198 | Q92769           | 7                    | 16             | 17.6                  | 488    | 55364 | 5.9 | Histone deacetylase 2                                                                                                                                                                                                                                    |
| 1199 | P16930           | 7                    | 11             | 17.4                  | 419    | 46374 | 6.9 | Fumarylacetoacetase                                                                                                                                                                                                                                      |
| 1200 | P36871           | 7                    | 15             | 17.4                  | 562    | 61449 | 6.8 | Phosphoglucosyltransferase-1                                                                                                                                                                                                                             |
| 1200 | UPI0000D61F2F    | 7                    | 15             | 17.4                  | 564    | 61633 | 6.8 | Phosphoglucosyltransferase-1 (EC 5.4.2.2) (Glucose phosphomutase 1) (PGM 1).                                                                                                                                                                             |
| 1200 | Q86U74           | 7                    | 15             | 17.4                  | 562    | 61370 | 6.6 | Phosphoglucosyltransferase 1                                                                                                                                                                                                                             |
| 1201 | P55010           | 7                    | 18             | 17.4                  | 431    | 49223 | 5.6 | Eukaryotic translation initiation factor 5                                                                                                                                                                                                               |
| 1201 | Q6IBU0           | 7                    | 18             | 17.4                  | 431    | 49152 | 5.5 | EIF5 protein                                                                                                                                                                                                                                             |
| 1202 | Q9UPE4           | 7                    | 17             | 18.8                  | 415    | 47366 | 7.4 | Putative mitochondrial inner membrane protein import receptor                                                                                                                                                                                            |
| 1202 | Q43615           | 7                    | 17             | 17.3                  | 452    | 51356 | 8.3 | Import inner membrane translocase subunit TIM44, mitochondrial precursor                                                                                                                                                                                 |
| 1202 | Q53G69           | 7                    | 17             | 17.3                  | 452    | 51324 | 8.3 | Translocase of inner mitochondrial membrane 44 homolog                                                                                                                                                                                                   |
| 1203 | P23368           | 7                    | 15             | 17                    | 584    | 65444 | 7.6 | NAD-dependent malic enzyme, mitochondrial precursor                                                                                                                                                                                                      |
| 1204 | P61619-2         | 7                    | 109            | 19.1                  | 423    | 46045 | 7.3 | Isoform 2 of P61619                                                                                                                                                                                                                                      |
| 1204 | P61619           | 7                    | 109            | 17                    | 476    | 52265 | 8.1 | Protein transport protein Sec61 subunit alpha isoform 1                                                                                                                                                                                                  |
| 1205 | P61011           | 7                    | 10             | 16.7                  | 504    | 55705 | 8.8 | Signal recognition particle 54 kDa protein                                                                                                                                                                                                               |
| 1206 | Q9H0C8           | 7                    | 17             | 16.6                  | 392    | 42907 | 7.1 | Integrin-linked kinase-associated serine/threonine phosphatase 2C                                                                                                                                                                                        |
| 1207 | Q7Z3B4           | 7                    | 11             | 16.6                  | 507    | 55436 | 7   | Nucleoporin p54                                                                                                                                                                                                                                          |
| 1207 | Q53H29           | 7                    | 11             | 16.5                  | 508    | 55564 | 7   | Nucleoporin 54kDa variant                                                                                                                                                                                                                                |
| 1208 | Q96HE7           | 7                    | 11             | 16.5                  | 468    | 54393 | 5.7 | ERO1-like protein alpha precursor                                                                                                                                                                                                                        |
| 1209 | Q4QQI8           | 7                    | 8              | 16.4                  | 608    | 66316 | 5.4 | RAP1, GTP-GDP dissociation stimulator 1                                                                                                                                                                                                                  |
| 1209 | UPI000004A01F    | 7                    | 8              | 16.4                  | 608    | 66388 | 5.3 | Rap1 GTPase-GDP dissociation stimulator 1 (SMG P21 stimulatory GDP/GTP exchange protein) (SMG GDS protein) (Exchange factor smgGDS).                                                                                                                     |
| 1210 | Q99829           | 7                    | 17             | 16.4                  | 537    | 59059 | 5.8 | Copine-1                                                                                                                                                                                                                                                 |
| 1211 | Q9H074           | 7                    | 13             | 16.1                  | 479    | 53525 | 4.8 | Polyadenylate-binding protein-interacting protein 1 (Poly(A)-binding protein-interacting protein 1)                                                                                                                                                      |
| 1212 | Q95202           | 7                    | 13             | 16                    | 739    | 83354 | 6.7 | Leucine zipper-EF-hand-containing transmembrane protein 1, mitochondrial precursor                                                                                                                                                                       |
| 1213 | Q8TAF6           | 7                    | 9              | 16.7                  | 670    | 74422 | 8   | Acyl-CoA synthetase 4                                                                                                                                                                                                                                    |
| 1213 | Q60488           | 7                    | 9              | 15.8                  | 711    | 79188 | 8.4 | Long-chain-fatty-acid--CoA ligase 4                                                                                                                                                                                                                      |
| 1214 | Q13177           | 7                    | 17             | 15.8                  | 524    | 58043 | 6   | Serine/threonine-protein kinase PAK 2                                                                                                                                                                                                                    |
| 1215 | UPI000013E7A3    | 7                    | 20             | 18                    | 477    | 52812 | 9.7 | DNA polymerase-transactivated protein 6 (DNAPT6), mRNA                                                                                                                                                                                                   |
| 1215 | Q8WV53           | 7                    | 20             | 17.6                  | 488    | 54050 | 9.6 | DNAPT6 protein                                                                                                                                                                                                                                           |

| No.  | Accession Number | Unique Peptide Count | Spectrum Count | Sequence Coverage (%) | Length | MolWt  | pI  | Descriptive Name                                                                                  |
|------|------------------|----------------------|----------------|-----------------------|--------|--------|-----|---------------------------------------------------------------------------------------------------|
| 1215 | Q53T22           | 7                    | 20             | 15.8                  | 545    | 60234  | 9.7 | Hypothetical protein DKFZP564A2416                                                                |
| 1215 | UPI000013F0CD    | 7                    | 20             | 15.8                  | 546    | 60362  | 9.7 | DNA polymerase-transactivated protein 6 (DNATP6), mRNA                                            |
| 1215 | Q9NUQ6           | 7                    | 20             | 15.4                  | 558    | 61759  | 9.6 | CDNA FLJ11202 fis, clone PLACE1007746                                                             |
| 1215 | Q9NTW4           | 7                    | 20             | 15.4                  | 558    | 61728  | 9.7 | Hypothetical protein DKFZp564A2416                                                                |
| 1216 | Q5PU80           | 7                    | 9              | 15.8                  | 549    | 61957  | 9.1 | Nucleostemin                                                                                      |
| 1216 | Q9BVP2           | 7                    | 9              | 15.8                  | 549    | 61997  | 9.1 | Guanine nucleotide-binding protein-like 3                                                         |
| 1217 | Q8NA80           | 7                    | 17             | 16.9                  | 534    | 58309  | 9.2 | CDNA FLJ35762 fis, clone TESTI2004793, moderately similar to Homo sapiens NY-REN-2 antigen mRNA   |
| 1217 | UPI0000D624D2    | 7                    | 17             | 15.5                  | 579    | 63076  | 9   | YTH domain family protein 3.                                                                      |
| 1217 | Q7Z739           | 7                    | 17             | 15.4                  | 585    | 63861  | 9   | YTH domain family protein 3                                                                       |
| 1218 | P33240-2         | 7                    | 12             | 15.7                  | 560    | 59251  | 6.8 | Isoform 2 of P33240                                                                               |
| 1218 | P33240           | 7                    | 12             | 15.3                  | 577    | 60959  | 6.8 | Cleavage stimulation factor 64 kDa subunit                                                        |
| 1218 | UPI0000D61DA0    | 7                    | 12             | 14.4                  | 611    | 64388  | 7.5 | Cleavage stimulation factor 64 kDa subunit (CSTF 64 kDa subunit) (CF-1 64 kDa subunit) (CstF-64). |
| 1219 | Q8TAT6           | 7                    | 20             | 14.8                  | 608    | 68120  | 6.4 | Nuclear protein localization protein 4 homolog                                                    |
| 1219 | UPI0000D623AF    | 7                    | 20             | 14.8                  | 607    | 67987  | 6.4 | Nuclear protein localization protein 4 homolog (Protein NPL4).                                    |
| 1219 | UPI000006F9F7    | 7                    | 20             | 14.8                  | 608    | 68183  | 6.3 | nuclear protein localization 4                                                                    |
| 1219 | UPI0000D623B0    | 7                    | 20             | 14.6                  | 616    | 69360  | 6.7 | Nuclear protein localization protein 4 homolog (Protein NPL4).                                    |
| 1219 | Q8TAT6-2         | 7                    | 20             | 14.6                  | 617    | 69461  | 6.7 | Isoform 2 of Q8TAT6                                                                               |
| 1220 | Q6PJG6           | 7                    | 9              | 14.7                  | 821    | 88119  | 5.3 | HEAT repeat domain-containing protein C7orf27 precursor                                           |
| 1220 | UPI0000001C11    | 7                    | 9              | 14.7                  | 821    | 88020  | 5.2 | hypothetical protein LOC221927                                                                    |
| 1221 | O94826           | 7                    | 13             | 14.3                  | 608    | 67455  | 7.1 | Mitochondrial precursor proteins import receptor                                                  |
| 1221 | Q6P0M2           | 7                    | 13             | 14.3                  | 607    | 67398  | 7.1 | Translocase of outer mitochondrial membrane 70 homolog A                                          |
| 1222 | Q99442           | 7                    | 34             | 14                    | 399    | 45862  | 7.1 | Translocation protein SEC62                                                                       |
| 1223 | Q27J83           | 7                    | 21             | 14                    | 707    | 77762  | 5.9 | Chromosome 14 open reading frame 173 isoform 1                                                    |
| 1223 | Q27J81           | 7                    | 21             | 13.8                  | 716    | 78769  | 5.6 | Uncharacterized protein C14orf173                                                                 |
| 1224 | Q9UG63           | 7                    | 11             | 13.8                  | 623    | 71290  | 7.4 | ATP-binding cassette sub-family F member 2                                                        |
| 1225 | Q8N8S7-2         | 7                    | 20             | 13.7                  | 570    | 63925  | 6.4 | Isoform 2 of Q8N8S7                                                                               |
| 1225 | Q8N8S7           | 7                    | 20             | 13.2                  | 591    | 66510  | 6.9 | Protein enabled homolog                                                                           |
| 1225 | UPI0000458AAB    | 7                    | 20             | 9.5                   | 817    | 88946  | 7.9 | Protein enabled homolog.                                                                          |
| 1226 | Q5BKZ1           | 7                    | 14             | 12.9                  | 582    | 65654  | 5.2 | Zinc finger protein 326                                                                           |
| 1227 | Q5R914           | 7                    | 15             | 12.9                  | 511    | 57659  | 6.3 | Serine/threonine protein phosphatase                                                              |
| 1228 | Q68E10           | 7                    | 7              | 13.2                  | 889    | 98916  | 6   | Hypothetical protein DKFZp686M1669                                                                |
| 1228 | UPI0000E8DA43    | 7                    | 7              | 13                    | 902    | 100479 | 6   | Hexokinase-2                                                                                      |
| 1228 | P52789           | 7                    | 7              | 12.8                  | 917    | 102380 | 6.1 | Hexokinase-2                                                                                      |
| 1229 | P08237           | 7                    | 11             | 12.6                  | 780    | 85182  | 8   | 6-phosphofructokinase, muscle type                                                                |
| 1229 | Q6ZTT1           | 7                    | 11             | 11.5                  | 851    | 93220  | 8   | CDNA FLJ44241 fis, clone THYMU3008436, highly similar to 6- phosphofructokinase, muscle type      |
| 1230 | Q9P2I0           | 7                    | 9              | 12.3                  | 782    | 88487  | 5.1 | Cleavage and polyadenylation specificity factor subunit 2                                         |
| 1231 | Q5T207           | 7                    | 43             | 12                    | 689    | 76744  | 5.7 | Nicastrin                                                                                         |
| 1231 | Q92542           | 7                    | 43             | 11.7                  | 709    | 78411  | 6   | Nicastrin precursor                                                                               |
| 1232 | O43747           | 7                    | 19             | 11.6                  | 822    | 91391  | 6.8 | AP-1 complex subunit gamma-1                                                                      |
| 1232 | UPI000013E60C    | 7                    | 19             | 11.6                  | 822    | 91351  | 6.8 | adaptor-related protein complex 1, gamma 1 subunit isoform b                                      |
| 1232 | UPI000016A4AD    | 7                    | 19             | 11.5                  | 825    | 91723  | 6.8 | adaptor-related protein complex 1, gamma 1 subunit isoform a                                      |
| 1232 | Q8IY97           | 7                    | 19             | 11.5                  | 825    | 91757  | 6.8 | Adaptor-related protein complex 1, gamma 1 subunit                                                |
| 1233 | P55290           | 7                    | 21             | 10.9                  | 713    | 78287  | 5   | Cadherin-13 precursor                                                                             |
| 1234 | Q96T76           | 7                    | 22             | 10.8                  | 1030   | 113275 | 6.4 | MMS19-like protein                                                                                |
| 1234 | UPI000013DDF7    | 7                    | 22             | 10.8                  | 1030   | 113289 | 6.4 | MMS19-like protein (hMMS19) (MET18 homolog).                                                      |
| 1235 | O94804           | 7                    | 18             | 9.9                   | 968    | 112135 | 6.9 | Serine/threonine-protein kinase 10                                                                |
| 1235 | UPI0000457386    | 7                    | 18             | 9.9                   | 974    | 112748 | 6.8 | Serine/threonine-protein kinase 10 (EC 2.7.11.1) (Lymphocyte-oriented kinase).                    |
| 1235 | Q6NSK0           | 7                    | 18             | 9.9                   | 968    | 112121 | 6.9 | Serine/threonine kinase 10                                                                        |
| 1236 | Q6WCQ1           | 7                    | 12             | 9.6                   | 1024   | 116446 | 6.2 | Myosin phosphatase Rho-interacting protein                                                        |
| 1236 | UPI0000366BAD    | 7                    | 12             | 9.6                   | 1025   | 116533 | 6.2 | myosin phosphatase-Rho interacting protein isoform 2                                              |
| 1236 | Q6WCQ1-2         | 7                    | 12             | 9.5                   | 1037   | 118016 | 6.4 | Isoform 2 of Q6WCQ1                                                                               |
| 1236 | UPI0000200A77    | 7                    | 12             | 9.4                   | 1038   | 118103 | 6.4 | myosin phosphatase-Rho interacting protein isoform 1                                              |
| 1237 | Q59FL7           | 7                    | 18             | 9.9                   | 807    | 89176  | 5.4 | Neural cell adhesion molecule 1, 120 kDa isoform variant                                          |
| 1237 | P13591           | 7                    | 18             | 9.4                   | 848    | 93361  | 4.9 | Neural cell adhesion molecule 1, 140 kDa isoform precursor                                        |
| 1237 | UPI0000E445E3    | 7                    | 18             | 9.3                   | 858    | 94574  | 4.9 | neural cell adhesion molecule 1 isoform 2                                                         |
| 1237 | Q86X47           | 7                    | 18             | 9.3                   | 858    | 94601  | 4.9 | Neural cell adhesion molecule 1                                                                   |
| 1238 | Q96T88           | 7                    | 12             | 9.3                   | 793    | 89814  | 7.6 | E3 ubiquitin-protein ligase UHRF1                                                                 |

| No.  | Accession Number | Unique Peptide Count | Spectrum Count | Sequence Coverage (%) | Length | MolWt  | pI  | Descriptive Name                                                                                                                                                                                                                                               |
|------|------------------|----------------------|----------------|-----------------------|--------|--------|-----|----------------------------------------------------------------------------------------------------------------------------------------------------------------------------------------------------------------------------------------------------------------|
| 1238 | UPI0000456BDE    | 7                    | 12             | 9.3                   | 792    | 89743  | 7.6 | E3 ubiquitin-protein ligase UHRF1 (EC 6.3.2.-) (Ubiquitin-like PHD and RING finger domain-containing protein 1) (Ubiquitin-like-containing PHD and RING finger domains protein 1) (Inverted CCAAT box-binding protein of 90 kDa) (Transcription factor ICBP90) |
| 1238 | UPI0000D48B65    | 7                    | 12             | 9.2                   | 806    | 91100  | 7.4 | ubiquitin-like, containing PHD and RING finger domains, 1 isoform 2                                                                                                                                                                                            |
| 1239 | A4D169           | 7                    | 19             | 9.1                   | 856    | 97687  | 6.5 | Oxysterol binding protein-like 3                                                                                                                                                                                                                               |
| 1239 | Q9H4L5           | 7                    | 19             | 8.8                   | 887    | 101224 | 6.9 | Oxysterol-binding protein-related protein 3                                                                                                                                                                                                                    |
| 1240 | Q6PJE1           | 7                    | 9              | 12.2                  | 686    | 79971  | 5.3 | NUP107 protein                                                                                                                                                                                                                                                 |
| 1240 | P57740           | 7                    | 9              | 9.1                   | 925    | 106374 | 5.4 | Nuclear pore complex protein Nup107                                                                                                                                                                                                                            |
| 1241 | UPI0000D620CF    | 7                    | 12             | 9.4                   | 1084   | 120372 | 5.2 | Nuclear pore complex protein Nup133 (Nucleoporin Nup133) (133 kDa nucleoporin).                                                                                                                                                                                |
| 1241 | Q8WUM0           | 7                    | 12             | 8.8                   | 1156   | 128979 | 5.1 | Nuclear pore complex protein Nup133                                                                                                                                                                                                                            |
| 1242 | UPI00001AFA18    | 7                    | 11             | 8.9                   | 979    | 111479 | 7.6 | Probable ATP-dependent RNA helicase DHX36 (EC 3.6.1.-) (DEAH box protein 36) (MLE-like protein 1) (RNA helicase associated with AU-rich element ARE).                                                                                                          |
| 1242 | Q9H2U1-3         | 7                    | 11             | 8.9                   | 979    | 111495 | 7.6 | Isoform 3 of Q9H2U1                                                                                                                                                                                                                                            |
| 1242 | Q9H2U1           | 7                    | 11             | 8.6                   | 1008   | 114776 | 7.7 | Probable ATP-dependent RNA helicase DHX36                                                                                                                                                                                                                      |
| 1242 | UPI000013ED25    | 7                    | 11             | 8.6                   | 1008   | 114760 | 7.7 | Probable ATP-dependent RNA helicase DHX36 (EC 3.6.1.-) (DEAH box protein 36) (MLE-like protein 1) (RNA helicase associated with AU-rich element ARE).                                                                                                          |
| 1243 | Q9Y6Y8           | 7                    | 13             | 8.6                   | 1000   | 111076 | 5.5 | SEC23-interacting protein                                                                                                                                                                                                                                      |
| 1244 | Q92974           | 7                    | 32             | 9.4                   | 893    | 101174 | 8.4 | Rho/Rac guanine nucleotide exchange factor 2                                                                                                                                                                                                                   |
| 1244 | Q9H023           | 7                    | 32             | 8.8                   | 958    | 108242 | 6.9 | Hypothetical protein DKFZp547L106 (Rho/rac guanine nucleotide exchange factor (GEF) 2)                                                                                                                                                                         |
| 1244 | Q5VY92           | 7                    | 32             | 8.5                   | 986    | 111543 | 7.3 | Rho/rac guanine nucleotide exchange factor (GEF) 2                                                                                                                                                                                                             |
| 1244 | Q8TDA3           | 7                    | 32             | 8.5                   | 985    | 111471 | 7.3 | Guanine nucleotide exchange factor GEF-H1 (Rho/rac guanine nucleotide exchange factor (GEF) 2)                                                                                                                                                                 |
| 1244 | Q5VY93           | 7                    | 32             | 8.5                   | 987    | 111493 | 7   | Rho/rac guanine nucleotide exchange factor (GEF) 2                                                                                                                                                                                                             |
| 1245 | Q14157           | 7                    | 14             | 8.4                   | 1087   | 114534 | 7.1 | Ubiquitin-associated protein 2-like                                                                                                                                                                                                                            |
| 1245 | UPI00000735C4    | 7                    | 14             | 8.4                   | 1087   | 114543 | 7.1 | ubiquitin associated protein 2-like                                                                                                                                                                                                                            |
| 1246 | O76046           | 7                    | 18             | 8.3                   | 1246   | 137794 | 6.1 | Putative RNA helicase Ski2w                                                                                                                                                                                                                                    |
| 1246 | Q9NPK3           | 7                    | 18             | 8.3                   | 1245   | 137624 | 6.1 | DJ34F7.7 (Superkiller viralicidic activity 2 (S. cerevisiae homolog)- like (SKI2W))                                                                                                                                                                            |
| 1246 | Q5ST66           | 7                    | 18             | 8.3                   | 1246   | 137755 | 6.1 | Superkiller viralicidic activity 2-like                                                                                                                                                                                                                        |
| 1246 | Q5JP73           | 7                    | 18             | 8.3                   | 1246   | 137737 | 6.1 | Superkiller viralicidic activity 2-like                                                                                                                                                                                                                        |
| 1247 | P08648           | 7                    | 13             | 8                     | 1049   | 114536 | 5.8 | Integrin alpha-5 precursor (Fibronectin receptor subunit alpha) (Integrin alpha-F) (VLA-5) (CD49e antigen) [Contains: Integrin alpha-5 heavy chain; Integrin alpha-5 light chain]                                                                              |
| 1248 | Q5VTR2           | 7                    | 10             | 7.9                   | 975    | 113662 | 5.9 | E3 ubiquitin-protein ligase BRE1A                                                                                                                                                                                                                              |
| 1248 | UPI000013DE3A    | 7                    | 10             | 7.9                   | 977    | 113977 | 6   | Ubiquitin-protein ligase BRE1A (EC 6.3.2.-) (BRE1-A) (hBRE1) (RING finger protein 20).                                                                                                                                                                         |
| 1249 | O15042-3         | 7                    | 18             | 12.9                  | 620    | 72524  | 7.6 | Isoform 3 of O15042                                                                                                                                                                                                                                            |
| 1249 | O15042           | 7                    | 18             | 7.8                   | 1029   | 118292 | 8.5 | U2-associated protein SR140                                                                                                                                                                                                                                    |
| 1249 | O15042-2         | 7                    | 18             | 7.8                   | 1028   | 118235 | 8.5 | Isoform 2 of O15042                                                                                                                                                                                                                                            |
| 1250 | Q9NTZ6           | 7                    | 10             | 7.8                   | 932    | 97396  | 8.6 | RNA-binding protein 12                                                                                                                                                                                                                                         |
| 1251 | Q14126           | 7                    | 10             | 7.7                   | 1117   | 122385 | 5.3 | Desmoglein-2 precursor                                                                                                                                                                                                                                         |
| 1251 | Q4KKU6           | 7                    | 10             | 7.7                   | 1118   | 122294 | 5.2 | Desmoglein 2                                                                                                                                                                                                                                                   |
| 1252 | Q9HAV4           | 7                    | 22             | 7.7                   | 1204   | 136311 | 5.8 | Exportin-5                                                                                                                                                                                                                                                     |
| 1252 | UPI00004A3AA6    | 7                    | 22             | 7.7                   | 1204   | 136260 | 5.8 | Exportin-5 (Exp5) (Ran-binding protein 21).                                                                                                                                                                                                                    |
| 1253 | Q03701           | 7                    | 18             | 7.1                   | 1054   | 120988 | 5.9 | CCAAT/enhancer-binding protein zeta                                                                                                                                                                                                                            |
| 1253 | UPI0000072AAB    | 7                    | 18             | 7.1                   | 1054   | 120974 | 5.9 | CCAAT/enhancer binding protein zeta                                                                                                                                                                                                                            |
| 1254 | O15067           | 7                    | 11             | 7                     | 1338   | 144664 | 5.8 | Phosphoribosylformylglycinamide synthase                                                                                                                                                                                                                       |
| 1254 | UPI00001A95E5    | 7                    | 11             | 7                     | 1338   | 144734 | 5.8 | phosphoribosylformylglycinamide synthase                                                                                                                                                                                                                       |
| 1255 | Q0VG08           | 7                    | 9              | 7.1                   | 1233   | 133629 | 7.4 | SEC24 related gene family, member B                                                                                                                                                                                                                            |
| 1255 | O95487           | 7                    | 9              | 6.9                   | 1268   | 137789 | 6.7 | Protein transport protein Sec24B                                                                                                                                                                                                                               |
| 1255 | UPI00004F6ED7    | 7                    | 9              | 6.9                   | 1268   | 137417 | 6.7 | SEC24 (S. cerevisiae) homolog B isoform a                                                                                                                                                                                                                      |
| 1255 | UPI00001AE8CE    | 7                    | 9              | 6.9                   | 1266   | 137573 | 6.7 | Protein transport protein Sec24B (SEC24-related protein B).                                                                                                                                                                                                    |
| 1256 | P82094           | 7                    | 8              | 6.9                   | 1093   | 123171 | 5   | TATA element modulatory factor                                                                                                                                                                                                                                 |
| 1256 | UPI0000457136    | 7                    | 8              | 6.9                   | 1091   | 122812 | 5   | TATA element modulatory factor (TMF).                                                                                                                                                                                                                          |
| 1256 | Q59GK0           | 7                    | 8              | 6.8                   | 1096   | 123027 | 4.9 | TATA element modulatory factor 1 variant                                                                                                                                                                                                                       |
| 1257 | UPI0000D625ED    | 7                    | 22             | 7.5                   | 1316   | 149100 | 5.6 | Nuclear pore complex protein Nup160 (Nucleoporin Nup160) (160 kDa nucleoporin).                                                                                                                                                                                |
| 1257 | Q12769           | 7                    | 22             | 7.5                   | 1316   | 149001 | 5.6 | Nuclear pore complex protein Nup160                                                                                                                                                                                                                            |
| 1257 | Q08AD3           | 7                    | 22             | 6.9                   | 1436   | 162091 | 5.5 | Nucleoporin 160kDa                                                                                                                                                                                                                                             |
| 1257 | UPI0000185FEB    | 7                    | 22             | 6.9                   | 1436   | 162121 | 5.5 | nucleoporin 160kDa                                                                                                                                                                                                                                             |
| 1258 | Q96L67           | 7                    | 11             | 8.2                   | 948    | 108513 | 5   | Nardilysin                                                                                                                                                                                                                                                     |
| 1258 | O43847           | 7                    | 11             | 6.8                   | 1150   | 131571 | 5   | Nardilysin precursor                                                                                                                                                                                                                                           |
| 1258 | UPI0000458A54    | 7                    | 11             | 6.8                   | 1151   | 131700 | 5   | Nardilysin precursor (EC 3.4.24.61) (N-arginine dibasic convertase) (NRD convertase) (NRD-C).                                                                                                                                                                  |

| No.  | Accession Number | Unique Peptide Count | Spectrum Count | Sequence Coverage (%) | Length | MolWt  | pI  | Descriptive Name                                                                                                                                                                                                               |
|------|------------------|----------------------|----------------|-----------------------|--------|--------|-----|--------------------------------------------------------------------------------------------------------------------------------------------------------------------------------------------------------------------------------|
| 1258 | UPI00004561DA    | 7                    | 11             | 6.8                   | 1150   | 131572 | 5   | Nardilysin precursor (EC 3.4.24.61) (N-arginine dibasic convertase) (NRD convertase) (NRD-C).                                                                                                                                  |
| 1258 | UPI000004EC94    | 7                    | 11             | 6.4                   | 1219   | 139328 | 5   | nardilysin (N-arginine dibasic convertase)                                                                                                                                                                                     |
| 1258 | Q5VUL1           | 7                    | 11             | 6.4                   | 1219   | 139413 | 5   | Nardilysin                                                                                                                                                                                                                     |
| 1258 | O43847-2         | 7                    | 11             | 6.4                   | 1218   | 139284 | 5   | Isoform 2 of O43847                                                                                                                                                                                                            |
| 1259 | P55011-3         | 7                    | 14             | 6.9                   | 1196   | 129679 | 6.5 | Isoform 2 of P55011                                                                                                                                                                                                            |
| 1259 | P55011           | 7                    | 14             | 6.8                   | 1212   | 131447 | 6.4 | Solute carrier family 12 member 2 (Bumetanide-sensitive sodium- (potassium)-chloride cotransporter 1)                                                                                                                          |
| 1259 | UPI0000D61674    | 7                    | 14             | 6.8                   | 1211   | 131391 | 6.5 | Solute carrier family 12 member 2 (Bumetanide-sensitive sodium- (potassium)-chloride cotransporter 1) (Basolateral Na-K-Cl symporter).                                                                                         |
| 1260 | Q9UP95-2         | 7                    | 17             | 6.8                   | 1068   | 118619 | 6.7 | Isoform 2 of Q9UP95                                                                                                                                                                                                            |
| 1260 | Q9UP95           | 7                    | 17             | 6.7                   | 1085   | 120650 | 6.4 | Solute carrier family 12 member 4                                                                                                                                                                                              |
| 1261 | P30876           | 7                    | 9              | 6.6                   | 1174   | 133896 | 6.9 | DNA-directed RNA polymerase II 140 kDa polypeptide                                                                                                                                                                             |
| 1262 | UPI00001AEDC0    | 7                    | 11             | 6.5                   | 1248   | 138907 | 6.2 | Neural cell adhesion molecule L1 precursor (N-CAM L1) (CD171 antigen).                                                                                                                                                         |
| 1262 | P32004-2         | 7                    | 11             | 6.5                   | 1253   | 139517 | 6.2 | Isoform 2 of P32004                                                                                                                                                                                                            |
| 1262 | P32004           | 7                    | 11             | 6.4                   | 1257   | 140003 | 6.2 | Neural cell adhesion molecule L1 precursor                                                                                                                                                                                     |
| 1263 | UPI0000457885    | 7                    | 14             | 6.4                   | 1231   | 141328 | 5.4 | Cohesin subunit SA-2 (Stromal antigen 2) (SCC3 homolog 2).                                                                                                                                                                     |
| 1263 | Q8N3U4           | 7                    | 14             | 6.4                   | 1231   | 141326 | 5.4 | Cohesin subunit SA-2                                                                                                                                                                                                           |
| 1263 | Q6MZM4           | 7                    | 14             | 6.4                   | 1231   | 141306 | 5.4 | Hypothetical protein DKFZp686P16143                                                                                                                                                                                            |
| 1263 | Q6MZM3           | 7                    | 14             | 6.4                   | 1231   | 141301 | 5.4 | Hypothetical protein DKFZp686C21148                                                                                                                                                                                            |
| 1263 | Q5JTI5           | 7                    | 14             | 6.2                   | 1268   | 145751 | 5.5 | Stromal antigen 2                                                                                                                                                                                                              |
| 1263 | UPI0000D61DCF    | 7                    | 14             | 6.2                   | 1268   | 145753 | 5.5 | Cohesin subunit SA-2 (Stromal antigen 2) (SCC3 homolog 2).                                                                                                                                                                     |
| 1263 | Q6MZP3           | 7                    | 14             | 6.2                   | 1268   | 145675 | 5.5 | Hypothetical protein DKFZp686I05169                                                                                                                                                                                            |
| 1263 | Q68DE9           | 7                    | 14             | 6.2                   | 1268   | 145781 | 5.5 | Hypothetical protein DKFZp781H1753                                                                                                                                                                                             |
| 1264 | UPI0000D61296    | 7                    | 14             | 6.3                   | 1252   | 135490 | 8.8 | Ras-associated and pleckstrin homology domains-containing protein 1 (RAPH1) (Lamellipodin) (Proline-rich EVH1 ligand 2) (PREL-2) (Protein RMO1) (Amyotrophic lateral sclerosis 2 chromosomal region candidate 9 gene protein). |
| 1264 | UPI000020940F    | 7                    | 14             | 6.3                   | 1250   | 135256 | 8.9 | Ras association and pleckstrin homology domains 1 isoform 1                                                                                                                                                                    |
| 1264 | Q70E73-10        | 7                    | 14             | 6.3                   | 1250   | 135242 | 8.9 | Isoform RMO1                                                                                                                                                                                                                   |
| 1264 | Q70E73           | 7                    | 14             | 6.1                   | 1302   | 141165 | 8.9 | Ras-associated and pleckstrin homology domains-containing protein 1                                                                                                                                                            |
| 1264 | UPI0000D61297    | 7                    | 14             | 6.1                   | 1304   | 141414 | 8.9 | Ras-associated and pleckstrin homology domains-containing protein 1 (RAPH1) (Lamellipodin) (Proline-rich EVH1 ligand 2) (PREL-2) (Protein RMO1) (Amyotrophic lateral sclerosis 2 chromosomal region candidate 9 gene protein). |
| 1265 | Q92896           | 7                    | 20             | 6.1                   | 1179   | 134593 | 6.9 | Golgi apparatus protein 1 precursor                                                                                                                                                                                            |
| 1265 | Q6P9D1           | 7                    | 20             | 6                     | 1203   | 137222 | 6.9 | Golgi apparatus protein 1                                                                                                                                                                                                      |
| 1266 | Q92626           | 7                    | 17             | 5.9                   | 1496   | 167210 | 7.3 | Peroxidase homolog                                                                                                                                                                                                             |
| 1267 | P30622-2         | 7                    | 7              | 5.5                   | 1392   | 156781 | 5.4 | Isoform Short of P30622                                                                                                                                                                                                        |
| 1267 | AOAVD3           | 7                    | 7              | 5.4                   | 1438   | 162246 | 5.4 | CLIP1 protein                                                                                                                                                                                                                  |
| 1267 | Q17RS4           | 7                    | 7              | 5.4                   | 1438   | 162270 | 5.4 | CLIP1 protein                                                                                                                                                                                                                  |
| 1267 | P30622           | 7                    | 7              | 5.4                   | 1427   | 160989 | 5.4 | CAP-Gly domain-containing linker protein 1                                                                                                                                                                                     |
| 1268 | UPI0000D612FA    | 7                    | 14             | 4.6                   | 1676   | 187847 | 6.7 | Tight junction protein ZO-1 (Zonula occludens 1 protein) (Zona occludens 1 protein) (Tight junction protein 1).                                                                                                                |
| 1268 | Q6MZU1           | 7                    | 14             | 4.6                   | 1692   | 189616 | 6.8 | Hypothetical protein DKFZp686A1195                                                                                                                                                                                             |
| 1268 | Q07157-2         | 7                    | 14             | 4.6                   | 1668   | 186965 | 6.8 | Isoform Short of Q07157                                                                                                                                                                                                        |
| 1268 | Q07157           | 7                    | 14             | 4.4                   | 1748   | 195457 | 6.7 | Tight junction protein ZO-1                                                                                                                                                                                                    |
| 1268 | UPI0000D612F9    | 7                    | 14             | 4.4                   | 1736   | 194834 | 6.8 | Tight junction protein ZO-1 (Zonula occludens 1 protein) (Zona occludens 1 protein) (Tight junction protein 1).                                                                                                                |
| 1269 | Q14CF1           | 7                    | 37             | 5.1                   | 1722   | 192074 | 6.5 | TRIP12 protein                                                                                                                                                                                                                 |
| 1269 | Q14669           | 7                    | 37             | 4.4                   | 1992   | 220432 | 8.5 | Probable E3 ubiquitin-protein ligase TRIP12                                                                                                                                                                                    |
| 1269 | UPI0000456F1C    | 7                    | 37             | 4.4                   | 1991   | 220245 | 8.5 | Thyroid receptor-interacting protein 12 (TRIP12).                                                                                                                                                                              |
| 1269 | Q14CA3           | 7                    | 37             | 4.3                   | 2040   | 225518 | 8.7 | TRIP12 protein                                                                                                                                                                                                                 |
| 1270 | Q14997           | 7                    | 12             | 4.1                   | 1843   | 211332 | 6.9 | Proteasome activator complex subunit 4                                                                                                                                                                                         |
| 1271 | UPI0000367131    | 7                    | 9              | 3.6                   | 2184   | 255638 | 5.4 | Golgin subfamily A member 4 (Trans-Golgi p230) (256 kDa golgin) (Golgin-245) (Protein 72.1).                                                                                                                                   |
| 1271 | Q13439-2         | 7                    | 9              | 3.6                   | 2185   | 255737 | 5.4 | Isoform 2 of Q13439                                                                                                                                                                                                            |
| 1271 | Q13439           | 7                    | 9              | 3.5                   | 2230   | 261137 | 5.4 | Golgin subfamily A member 4                                                                                                                                                                                                    |
| 1271 | Q13439-4         | 7                    | 9              | 3.5                   | 2228   | 260948 | 5.4 | Isoform 4 of Q13439                                                                                                                                                                                                            |
| 1271 | Q13439-3         | 7                    | 9              | 3.5                   | 2223   | 260322 | 5.4 | Isoform 3 of Q13439                                                                                                                                                                                                            |
| 1272 | Q8WUH6           | 6                    | 21             | 79.3                  | 116    | 11748  | 9.3 | Uncharacterized protein C12orf23                                                                                                                                                                                               |
| 1273 | Q9Y5L4           | 6                    | 15             | 62.1                  | 95     | 10500  | 8.2 | Mitochondrial import inner membrane translocase subunit Tim13                                                                                                                                                                  |
| 1274 | O60361           | 6                    | 49             | 61.3                  | 137    | 15529  | 8.6 | Putative nucleoside diphosphate kinase                                                                                                                                                                                         |
| 1275 | P41567           | 6                    | 23             | 61.1                  | 113    | 12732  | 7.5 | Eukaryotic translation initiation factor 1                                                                                                                                                                                     |
| 1276 | P99999           | 6                    | 77             | 55.2                  | 105    | 11749  | 9.6 | Cytochrome c                                                                                                                                                                                                                   |
| 1277 | Q9Y3B4           | 6                    | 13             | 53.6                  | 125    | 14585  | 9.4 | Pre-mRNA branch site protein p14                                                                                                                                                                                               |



| No.  | Accession Number | Unique Peptide Count | Spectrum Count | Sequence Coverage (%) | Length | MolWt | pI   | Descriptive Name                                                                                                                                                                                                   |
|------|------------------|----------------------|----------------|-----------------------|--------|-------|------|--------------------------------------------------------------------------------------------------------------------------------------------------------------------------------------------------------------------|
| 1278 | P62244           | 6                    | 76             | 53.1                  | 130    | 14839 | 10.1 | 40S ribosomal protein S15a                                                                                                                                                                                         |
| 1279 | O14737           | 6                    | 34             | 52.8                  | 125    | 14285 | 6    | Programmed cell death protein 5                                                                                                                                                                                    |
| 1280 | Q2PFU1           | 6                    | 11             | 51.2                  | 129    | 14665 | 4.9  | Huntingtin-interacting protein HYPK                                                                                                                                                                                |
| 1280 | Q9NX55           | 6                    | 11             | 37.7                  | 175    | 19332 | 5.4  | Huntingtin-interacting protein HYPK                                                                                                                                                                                |
| 1281 | Q9BTQ7           | 6                    | 107            | 52.2                  | 134    | 14150 | 10.3 | Similar to ribosomal protein L23                                                                                                                                                                                   |
| 1281 | P62829           | 6                    | 107            | 50                    | 140    | 14865 | 10.5 | 60S ribosomal protein L23                                                                                                                                                                                          |
| 1281 | UPI0000D62314    | 6                    | 107            | 50                    | 140    | 14811 | 10.4 | 60S ribosomal protein L23 (Ribosomal protein L17).                                                                                                                                                                 |
| 1282 | Q4W5L2           | 6                    | 10             | 67.6                  | 102    | 10190 | 9.5  | Hypothetical protein SNCA                                                                                                                                                                                          |
| 1282 | P37840-2         | 6                    | 10             | 61.6                  | 112    | 11372 | 8.3  | Isoform 2                                                                                                                                                                                                          |
| 1282 | P37840           | 6                    | 10             | 49.3                  | 140    | 14460 | 4.7  | Alpha-synuclein                                                                                                                                                                                                    |
| 1283 | P62316           | 6                    | 95             | 49.2                  | 118    | 13527 | 9.9  | Small nuclear ribonucleoprotein Sm D2                                                                                                                                                                              |
| 1284 | O15212           | 6                    | 9              | 48.8                  | 129    | 14583 | 8.9  | Prefoldin subunit 6                                                                                                                                                                                                |
| 1285 | P30050           | 6                    | 59             | 47.9                  | 165    | 17819 | 9.4  | 60S ribosomal protein L12                                                                                                                                                                                          |
| 1285 | UPI0000D6190D    | 6                    | 59             | 34.5                  | 229    | 24724 | 9.9  | 60S ribosomal protein L12.                                                                                                                                                                                         |
| 1286 | O75964           | 6                    | 52             | 47.6                  | 103    | 11428 | 9.6  | ATP synthase subunit g, mitochondrial                                                                                                                                                                              |
| 1287 | Q13232           | 6                    | 7              | 47.3                  | 169    | 19015 | 7.8  | Nucleoside diphosphate kinase 3                                                                                                                                                                                    |
| 1288 | Q8N5N7           | 6                    | 11             | 46.8                  | 158    | 18325 | 7.9  | Mitochondrial 39S ribosomal protein L50                                                                                                                                                                            |
| 1289 | P30043           | 6                    | 22             | 46.6                  | 206    | 22119 | 7.6  | Flavin reductase                                                                                                                                                                                                   |
| 1289 | UPI000013D3F5    | 6                    | 22             | 45.5                  | 211    | 22594 | 7.6  | Flavin reductase (EC 1.5.1.30) (FR) (NADPH-dependent diaphorase) (NADPH-flavin reductase) (FLR) (Biliverdin reductase B) (EC 1.3.1.24) (BVR-B) (Biliverdin-IX beta-reductase) (Green heme-binding protein) (GHBP). |
| 1290 | Q9ULC4           | 6                    | 18             | 46.4                  | 181    | 20555 | 8.8  | Malignant T cell amplified sequence 1                                                                                                                                                                              |
| 1291 | Q15370           | 6                    | 20             | 45.8                  | 118    | 13133 | 4.9  | Transcription elongation factor B polypeptide 2                                                                                                                                                                    |
| 1291 | UPI0000353500    | 6                    | 20             | 33.5                  | 161    | 17911 | 6.1  | elongin B isoform b                                                                                                                                                                                                |
| 1292 | P24666           | 6                    | 18             | 45.6                  | 158    | 18042 | 6.8  | Low molecular weight phosphotyrosine protein phosphatase                                                                                                                                                           |
| 1292 | Q59EH3           | 6                    | 18             | 43.6                  | 165    | 18698 | 7.9  | Acid phosphatase 1 isoform c variant                                                                                                                                                                               |
| 1293 | Q9Y5S9           | 6                    | 29             | 45.4                  | 174    | 19889 | 5.7  | RNA-binding protein 8A                                                                                                                                                                                             |
| 1294 | Q8N5K1           | 6                    | 9              | 50.4                  | 135    | 15278 | 9.6  | Zinc finger, CDGSH-type domain 2                                                                                                                                                                                   |
| 1294 | Q7Z3D5           | 6                    | 9              | 45.3                  | 150    | 16793 | 9.4  | Zinc finger CDGSH domain-containing protein 2                                                                                                                                                                      |
| 1295 | P30405           | 6                    | 19             | 44.4                  | 207    | 22040 | 9.4  | Peptidyl-prolyl cis-trans isomerase, mitochondrial precursor                                                                                                                                                       |
| 1296 | P16104           | 6                    | 108            | 44.1                  | 143    | 15145 | 10.7 | Histone H2A.x                                                                                                                                                                                                      |
| 1297 | O43324           | 6                    | 12             | 43.7                  | 174    | 19811 | 8.6  | Eukaryotic translation elongation factor 1 epsilon-1                                                                                                                                                               |
| 1298 | Q9NVJ2           | 6                    | 21             | 43.5                  | 186    | 21539 | 8.4  | ADP-ribosylation factor-like protein 8B                                                                                                                                                                            |
| 1299 | P14927           | 6                    | 23             | 43.2                  | 111    | 13530 | 8.8  | Ubiquinol-cytochrome c reductase complex 14 kDa protein                                                                                                                                                            |
| 1300 | Q53G62           | 6                    | 7              | 42.8                  | 187    | 20771 | 9.3  | Mitochondrial ribosomal protein S28 variant                                                                                                                                                                        |
| 1300 | Q9Y2Q9           | 6                    | 7              | 42.8                  | 187    | 20843 | 9.1  | Mitochondrial 28S ribosomal protein S28                                                                                                                                                                            |
| 1301 | Q15819           | 6                    | 42             | 41.4                  | 145    | 16363 | 8    | Ubiquitin-conjugating enzyme E2 variant 2                                                                                                                                                                          |
| 1302 | Q6IAA8           | 6                    | 15             | 41                    | 161    | 17745 | 5.1  | UPF0404 protein C11orf59                                                                                                                                                                                           |
| 1303 | P24534           | 6                    | 83             | 40.9                  | 225    | 24764 | 4.7  | Elongation factor 1-beta                                                                                                                                                                                           |
| 1303 | UPI000013DA8E    | 6                    | 83             | 40.9                  | 225    | 24932 | 4.7  | PREDICTED: similar to eukaryotic translation elongation factor 1 beta 2                                                                                                                                            |
| 1304 | Q9NWU2           | 6                    | 8              | 40.8                  | 228    | 26749 | 5    | Protein C20orf11                                                                                                                                                                                                   |
| 1305 | P51970           | 6                    | 10             | 40.7                  | 172    | 20105 | 7.6  | NADH dehydrogenase [ubiquinone] 1 alpha subcomplex subunit 8                                                                                                                                                       |
| 1306 | Q9UBI1           | 6                    | 10             | 40                    | 195    | 22151 | 6    | COMM domain-containing protein 3                                                                                                                                                                                   |
| 1307 | P36404           | 6                    | 9              | 39.7                  | 184    | 20878 | 6.4  | ADP-ribosylation factor-like protein 2                                                                                                                                                                             |
| 1308 | P36405           | 6                    | 14             | 39.6                  | 182    | 20456 | 7.2  | ADP-ribosylation factor-like protein 3                                                                                                                                                                             |
| 1308 | Q53X83           | 6                    | 14             | 39.6                  | 182    | 20474 | 7.2  | ARL3 protein                                                                                                                                                                                                       |
| 1309 | P20338           | 6                    | 12             | 39                    | 213    | 23871 | 6.1  | Ras-related protein Rab-4A                                                                                                                                                                                         |
| 1309 | Q5T7P7           | 6                    | 12             | 38.1                  | 218    | 24390 | 6.1  | RAB4A, member RAS oncogene family                                                                                                                                                                                  |
| 1309 | Q53GC2           | 6                    | 12             | 38.1                  | 218    | 24332 | 6.6  | RAB4A, member RAS oncogene family variant                                                                                                                                                                          |
| 1309 | UPI0000D620CE    | 6                    | 12             | 37.9                  | 219    | 24446 | 7.2  | Protein SPHAR (S-phase response protein).                                                                                                                                                                          |
| 1309 | UPI0000D620CD    | 6                    | 12             | 37.9                  | 219    | 24432 | 6.6  | Protein SPHAR (S-phase response protein).                                                                                                                                                                          |
| 1310 | P62807           | 6                    | 285            | 39.2                  | 125    | 13819 | 10.3 | Histone H2B type 1-C/E/F/G/I                                                                                                                                                                                       |
| 1310 | A0AVI3           | 6                    | 285            | 38.9                  | 126    | 13916 | 10.3 | H2B histone family, member S                                                                                                                                                                                       |
| 1310 | Q99880           | 6                    | 285            | 38.9                  | 126    | 13952 | 10.3 | Histone H2B type 1-L                                                                                                                                                                                               |
| 1310 | Q99879           | 6                    | 285            | 38.9                  | 126    | 13989 | 10.3 | Histone H2B type 1-M                                                                                                                                                                                               |
| 1310 | Q99877           | 6                    | 285            | 38.9                  | 126    | 13922 | 10.3 | Histone H2B type 1-N                                                                                                                                                                                               |
| 1310 | Q93079           | 6                    | 285            | 38.9                  | 126    | 13892 | 10.3 | Histone H2B type 1-H                                                                                                                                                                                               |
| 1310 | Q5QNW6           | 6                    | 285            | 38.9                  | 126    | 13920 | 10.3 | Histone H2B type 2-F                                                                                                                                                                                               |
| 1310 | P58876           | 6                    | 285            | 38.9                  | 126    | 13936 | 10.3 | Histone H2B type 1-D                                                                                                                                                                                               |
| 1310 | P57053           | 6                    | 285            | 38.9                  | 126    | 13944 | 10.4 | Histone H2B type F-S                                                                                                                                                                                               |
| 1310 | O60814           | 6                    | 285            | 38.9                  | 126    | 13890 | 10.3 | Histone H2B type 1-K                                                                                                                                                                                               |
| 1311 | O00161           | 6                    | 17             | 38.9                  | 211    | 23354 | 5    | Synaptosomal-associated protein 23                                                                                                                                                                                 |
| 1312 | P49720           | 6                    | 37             | 38.5                  | 205    | 22949 | 6.5  | Proteasome subunit beta type 3                                                                                                                                                                                     |
| 1313 | UPI0000251F42    | 6                    | 45             | 38.7                  | 124    | 13614 | 10.1 | PREDICTED: similar to 40S ribosomal protein S25                                                                                                                                                                    |
| 1313 | UPI000013DA0C    | 6                    | 45             | 38.7                  | 124    | 13615 | 10   | PREDICTED: similar to 40S ribosomal protein S25                                                                                                                                                                    |
| 1313 | P62851           | 6                    | 45             | 38.4                  | 125    | 13742 | 10.1 | 40S ribosomal protein S25                                                                                                                                                                                          |
| 1314 | P46783           | 6                    | 66             | 38.2                  | 165    | 18898 | 10.2 | 40S ribosomal protein S10                                                                                                                                                                                          |
| 1315 | Q502X2           | 6                    | 17             | 38.2                  | 186    | 21233 | 4.8  | Diablo homolog                                                                                                                                                                                                     |
| 1315 | Q9NR28           | 6                    | 17             | 29.7                  | 239    | 27131 | 5.9  | Diablo homolog, mitochondrial precursor                                                                                                                                                                            |
| 1316 | Q9UBQ5           | 6                    | 29             | 37.2                  | 218    | 25060 | 4.9  | Eukaryotic translation initiation factor 3 subunit 12                                                                                                                                                              |
| 1317 | Q969H8           | 6                    | 47             | 37                    | 173    | 18795 | 6.7  | Uncharacterized protein C19orf10 precursor                                                                                                                                                                         |
| 1318 | P49207           | 6                    | 39             | 36.8                  | 117    | 13293 | 11.5 | 60S ribosomal protein L34                                                                                                                                                                                          |

| No.  | Accession Number | Unique Peptide Count | Spectrum Count | Sequence Coverage (%) | Length | MolWt | pI   | Descriptive Name                                                                                                       |
|------|------------------|----------------------|----------------|-----------------------|--------|-------|------|------------------------------------------------------------------------------------------------------------------------|
| 1319 | Q9BYD1           | 6                    | 11             | 36.5                  | 178    | 20692 | 9.1  | 39S ribosomal protein L13, mitochondrial                                                                               |
| 1320 | P62277           | 6                    | 58             | 36.4                  | 151    | 17222 | 10.5 | 40S ribosomal protein S13                                                                                              |
| 1321 | P28070           | 6                    | 29             | 35.6                  | 264    | 29204 | 6    | Proteasome subunit beta type 4 precursor                                                                               |
| 1321 | Q6IBI4           | 6                    | 29             | 35.6                  | 264    | 29190 | 6    | Proteasome subunit beta type                                                                                           |
| 1322 | P62256           | 6                    | 15             | 35.5                  | 183    | 20655 | 4.7  | Ubiquitin-conjugating enzyme E2 H                                                                                      |
| 1323 | P21291           | 6                    | 23             | 35.2                  | 193    | 20567 | 8.6  | Cysteine and glycine-rich protein 1                                                                                    |
| 1324 | Q00169           | 6                    | 6              | 35.2                  | 270    | 31806 | 6.5  | Phosphatidylinositol transfer protein alpha isoform                                                                    |
| 1325 | P61086           | 6                    | 11             | 34.5                  | 200    | 22407 | 5.4  | Ubiquitin-conjugating enzyme E2-25 kDa (EC 6.3.2.19) (Ubiquitin- protein ligase) (Ubiquitin carrier protein) (E2(25K)) |
| 1326 | P05090           | 6                    | 37             | 34.4                  | 189    | 21276 | 5.1  | Apolipoprotein D precursor                                                                                             |
| 1327 | P51148           | 6                    | 59             | 34.3                  | 216    | 23483 | 8.4  | Ras-related protein Rab-5C                                                                                             |
| 1328 | Q86V81           | 6                    | 41             | 33.9                  | 257    | 26888 | 11.2 | THO complex subunit 4                                                                                                  |
| 1329 | P46779           | 6                    | 60             | 33.6                  | 137    | 15747 | 12   | 60S ribosomal protein L28                                                                                              |
| 1330 | Q08ES8           | 6                    | 48             | 33.3                  | 177    | 20094 | 9.6  | Cell growth-inhibiting protein 34                                                                                      |
| 1330 | P62913-2         | 6                    | 48             | 33.3                  | 177    | 20124 | 9.6  | Isoform 2 of P62913                                                                                                    |
| 1330 | P62913           | 6                    | 48             | 33.1                  | 178    | 20252 | 9.6  | 60S ribosomal protein L11                                                                                              |
| 1331 | Q9UL25           | 6                    | 29             | 32.9                  | 225    | 24348 | 7.9  | Ras-related protein Rab-21                                                                                             |
| 1332 | Q9UES0           | 6                    | 19             | 34                    | 191    | 21607 | 6.5  | SNARE protein Ykt6                                                                                                     |
| 1332 | O15498           | 6                    | 19             | 32.8                  | 198    | 22418 | 6.9  | Synaptobrevin homolog YKT6                                                                                             |
| 1333 | Q9Y5Z4           | 6                    | 11             | 32.7                  | 205    | 22875 | 4.6  | Heme-binding protein 2                                                                                                 |
| 1334 | P18621           | 6                    | 112            | 32.6                  | 184    | 21397 | 10.2 | 60S ribosomal protein L17                                                                                              |
| 1334 | Q6NZ54           | 6                    | 112            | 32.6                  | 184    | 21416 | 10.2 | Ribosomal protein L17                                                                                                  |
| 1334 | UPI0000456877    | 6                    | 112            | 32.4                  | 185    | 21441 | 10.1 | 60S ribosomal protein L17 (L23).                                                                                       |
| 1335 | Q13155           | 6                    | 11             | 32.5                  | 320    | 35349 | 8.2  | Multisynthetase complex auxiliary component p38                                                                        |
| 1336 | Q85KS8           | 6                    | 41             | 32.2                  | 227    | 25566 | 4.8  | Cytochrome oxidase subunit II                                                                                          |
| 1337 | P40855           | 6                    | 8              | 32.1                  | 299    | 32807 | 4.3  | Peroxisomal biogenesis factor 19                                                                                       |
| 1338 | Q9UK41           | 6                    | 16             | 32.1                  | 221    | 25425 | 5.5  | Vacuolar protein sorting-associated protein 28 homolog                                                                 |
| 1339 | P35625           | 6                    | 18             | 31.3                  | 211    | 24145 | 8.7  | Metalloproteinase inhibitor 3 precursor                                                                                |
| 1340 | Q53S50           | 6                    | 8              | 32.9                  | 249    | 28345 | 6.5  | Hypothetical protein MTX2                                                                                              |
| 1340 | Q8IZ68           | 6                    | 8              | 32.4                  | 253    | 28823 | 6.5  | Metaxin 2                                                                                                              |
| 1340 | O75431           | 6                    | 8              | 31.2                  | 263    | 29763 | 6.3  | Metaxin-2                                                                                                              |
| 1341 | Q53G20           | 6                    | 44             | 31.2                  | 218    | 23645 | 10.9 | Ribosomal protein L14 variant                                                                                          |
| 1342 | Q9NQ88           | 6                    | 16             | 31.1                  | 270    | 30063 | 7.7  | Uncharacterized protein C12orf5                                                                                        |
| 1343 | Q15286           | 6                    | 28             | 30.8                  | 201    | 23025 | 8.3  | Ras-related protein Rab-35                                                                                             |
| 1343 | UPI0000456691    | 6                    | 28             | 30.8                  | 201    | 23053 | 8    | Ras-related protein Rab-35 (Rab-1C) (GTP-binding protein RAY).                                                         |
| 1344 | O95292           | 6                    | 46             | 30.5                  | 243    | 27228 | 7.3  | Vesicle-associated membrane protein-associated protein B/C                                                             |
| 1345 | Q9HCT2           | 6                    | 9              | 30.5                  | 187    | 21991 | 5.6  | Core binding factor beta isoform PEBP2B                                                                                |
| 1346 | Q9GZQ3           | 6                    | 6              | 30.4                  | 224    | 24670 | 7    | COMM domain-containing protein 5                                                                                       |
| 1347 | Q9UPY8           | 6                    | 8              | 30.2                  | 281    | 31982 | 5.5  | Microtubule-associated protein RP/EB family member 3                                                                   |
| 1348 | P62266           | 6                    | 62             | 30.1                  | 143    | 15808 | 10.5 | 40S ribosomal protein S23                                                                                              |
| 1348 | UPI00005E9ED6    | 6                    | 62             | 30.1                  | 143    | 15790 | 10.5 | 40S ribosomal protein S23.                                                                                             |
| 1349 | Q96HY6           | 6                    | 9              | 29.6                  | 314    | 35611 | 5.1  | Uncharacterized protein C20orf116 precursor                                                                            |
| 1349 | UPI0000456F5C    | 6                    | 9              | 29.6                  | 314    | 35595 | 5.2  | Uncharacterized protein C20orf116 precursor.                                                                           |
| 1350 | Q15056           | 6                    | 19             | 29                    | 248    | 27385 | 7.2  | Eukaryotic translation initiation factor 4H                                                                            |
| 1351 | P08579           | 6                    | 27             | 28.9                  | 225    | 25486 | 9.7  | U2 small nuclear ribonucleoprotein B"                                                                                  |
| 1352 | Q6IAX4           | 6                    | 36             | 28.8                  | 208    | 23562 | 8.9  | RTN1 protein                                                                                                           |
| 1352 | Q9BQ59           | 6                    | 36             | 28.8                  | 208    | 23576 | 8.9  | Reticulon 1                                                                                                            |
| 1353 | P09496-2         | 6                    | 22             | 28.4                  | 218    | 23662 | 4.5  | Isoform Non                                                                                                            |
| 1354 | P52597           | 6                    | 15             | 28.4                  | 415    | 45672 | 5.6  | Heterogeneous nuclear ribonucleoprotein F                                                                              |
| 1355 | P68402           | 6                    | 26             | 28.4                  | 229    | 25569 | 5.9  | Platelet-activating factor acetylhydrolase IB subunit beta                                                             |
| 1356 | P39748           | 6                    | 10             | 28.2                  | 380    | 42593 | 8.6  | Flap endonuclease 1                                                                                                    |
| 1357 | A3KFL4           | 6                    | 8              | 27.8                  | 263    | 29408 | 7.2  | Exosome component 2                                                                                                    |
| 1357 | Q13868           | 6                    | 8              | 24.9                  | 293    | 32789 | 7.5  | Exosome complex exonuclease RRP4                                                                                       |
| 1358 | Q9BSQ6           | 6                    | 49             | 27.9                  | 201    | 23375 | 10.9 | RPL13A protein                                                                                                         |
| 1358 | P40429           | 6                    | 49             | 27.6                  | 203    | 23577 | 10.9 | 60S ribosomal protein L13a                                                                                             |
| 1358 | UPI000013DB4D    | 6                    | 49             | 27.6                  | 203    | 23619 | 10.9 | PREDICTED: similar to ribosomal protein L13a isoform 1                                                                 |
| 1358 | Q5QTS3           | 6                    | 49             | 27.6                  | 203    | 23662 | 11   | FWP004                                                                                                                 |
| 1358 | Q53H34           | 6                    | 49             | 27.6                  | 203    | 23558 | 10.9 | Ribosomal protein L13a variant                                                                                         |
| 1359 | Q13630           | 6                    | 13             | 27.4                  | 321    | 35893 | 6.6  | GDP-L-fucose synthetase (EC 1.1.1.271) (Protein FX) (Red cell NADP(H)- binding protein)                                |
| 1360 | Q14696           | 6                    | 20             | 27.4                  | 234    | 26077 | 7.8  | Mesoderm development candidate 2                                                                                       |
| 1361 | Q8WXX5           | 6                    | 9              | 26.9                  | 260    | 29910 | 5.7  | DnaJ homolog subfamily C member 9                                                                                      |
| 1362 | Q6IN49           | 6                    | 10             | 26.8                  | 332    | 37490 | 7.9  | Cysteine and histidine-rich domain-containing protein 1                                                                |
| 1363 | Q5VWZ2           | 6                    | 11             | 26.6                  | 237    | 26316 | 7.8  | Lysophospholipase-like protein 1                                                                                       |
| 1363 | UPI00000709FC    | 6                    | 11             | 26.6                  | 237    | 26334 | 7.8  | lysophospholipase-like 1                                                                                               |
| 1364 | P04183           | 6                    | 8              | 26.5                  | 234    | 25469 | 8.5  | Thymidine kinase, cytosolic                                                                                            |
| 1364 | UPI0000F58EFA    | 6                    | 8              | 26.5                  | 234    | 25354 | 8.5  | Thymidine kinase                                                                                                       |
| 1364 | UPI0000161B4B    | 6                    | 8              | 26.5                  | 234    | 25501 | 8.5  | thymidine kinase 1, soluble                                                                                            |
| 1365 | Q13505           | 6                    | 9              | 26.5                  | 317    | 35777 | 6.3  | Metaxin-1                                                                                                              |
| 1366 | Q96LJ7           | 6                    | 7              | 26.5                  | 313    | 33909 | 7.8  | Dehydrogenase/reductase SDR family member 1                                                                            |
| 1367 | O95336           | 6                    | 24             | 26.4                  | 258    | 27547 | 6.1  | 6-phosphogluconolactonase                                                                                              |

| No.  | Accession Number | Unique Peptide Count | Spectrum Count | Sequence Coverage (%) | Length | MolWt | pI   | Descriptive Name                                                                                                                                                                                                                                                |
|------|------------------|----------------------|----------------|-----------------------|--------|-------|------|-----------------------------------------------------------------------------------------------------------------------------------------------------------------------------------------------------------------------------------------------------------------|
| 1368 | O00625           | 6                    | 12             | 26.2                  | 290    | 32113 | 6.9  | Pirin                                                                                                                                                                                                                                                           |
| 1368 | Q6FHD2           | 6                    | 12             | 26.2                  | 290    | 32157 | 6.8  | PIR protein                                                                                                                                                                                                                                                     |
| 1369 | Q9H4A6           | 6                    | 15             | 26.2                  | 298    | 33811 | 6.4  | Golgi phosphoprotein 3                                                                                                                                                                                                                                          |
| 1370 | Q15006           | 6                    | 17             | 25.9                  | 297    | 34833 | 6.6  | Tetraatricopeptide repeat protein 35                                                                                                                                                                                                                            |
| 1370 | Q53HG5           | 6                    | 17             | 25.9                  | 297    | 34761 | 6.8  | KIAA0103 variant                                                                                                                                                                                                                                                |
| 1371 | Q59FE1           | 6                    | 7              | 25.9                  | 243    | 27829 | 7.5  | Eukaryotic translation initiation factor 4E member 2 variant                                                                                                                                                                                                    |
| 1371 | O60573           | 6                    | 7              | 25.7                  | 245    | 28362 | 8.9  | Eukaryotic translation initiation factor 4E type 2                                                                                                                                                                                                              |
| 1371 | UPI0000D612CB    | 6                    | 7              | 24.7                  | 255    | 29289 | 8    | Eukaryotic translation initiation factor 4E type 2 (eIF4E type 2) (eIF-4E type 2) (mRNA cap-binding protein type 3) (Eukaryotic translation initiation factor 4E-like 3) (Eukaryotic translation initiation factor 4E homologous protein) (mRNA cap-binding pro |
| 1372 | P32322           | 6                    | 8              | 25.7                  | 319    | 33361 | 7.6  | Pyroline-5-carboxylate reductase 1                                                                                                                                                                                                                              |
| 1373 | P48556           | 6                    | 16             | 25.7                  | 257    | 30005 | 7.3  | 26S proteasome non-ATPase regulatory subunit 8                                                                                                                                                                                                                  |
| 1373 | Q5U0B3           | 6                    | 16             | 25.7                  | 257    | 29922 | 7.3  | Proteasome (Prosome, macropain) 26S subunit, non-ATPase, 8                                                                                                                                                                                                      |
| 1374 | O15305           | 6                    | 11             | 25.6                  | 246    | 28082 | 6.8  | Phosphomannomutase 2                                                                                                                                                                                                                                            |
| 1375 | Q16629-3         | 6                    | 70             | 46.2                  | 132    | 15257 | 9.6  | Isoform 3 of Q16629                                                                                                                                                                                                                                             |
| 1375 | Q16629-2         | 6                    | 70             | 45.2                  | 135    | 15573 | 9.8  | Isoform 2 of Q16629                                                                                                                                                                                                                                             |
| 1375 | UPI000013D48B    | 6                    | 70             | 44.5                  | 137    | 15763 | 9.8  | Splicing factor, arginine/serine-rich 7 (Splicing factor 9G8).                                                                                                                                                                                                  |
| 1375 | Q16629           | 6                    | 70             | 25.6                  | 238    | 27367 | 11.8 | Splicing factor, arginine/serine-rich 7                                                                                                                                                                                                                         |
| 1376 | Q9BUN8           | 6                    | 20             | 25.5                  | 251    | 28801 | 9.5  | Derlin-1                                                                                                                                                                                                                                                        |
| 1377 | P62993           | 6                    | 11             | 25.3                  | 217    | 25206 | 6.3  | Growth factor receptor-bound protein 2                                                                                                                                                                                                                          |
| 1377 | Q6ICN0           | 6                    | 11             | 25.3                  | 217    | 25148 | 6.5  | GRB2 protein                                                                                                                                                                                                                                                    |
| 1378 | Q99729-3         | 6                    | 48             | 29.5                  | 285    | 30588 | 7.9  | Isoform 3 of Q99729                                                                                                                                                                                                                                             |
| 1378 | UPI000013EBF8    | 6                    | 48             | 25.5                  | 329    | 36187 | 8.6  | Heterogeneous nuclear ribonucleoprotein A/B (hnRNP A/B) (APOBEC-1-binding protein 1) (ABBP-1).                                                                                                                                                                  |
| 1378 | Q53F64           | 6                    | 48             | 25.3                  | 332    | 35996 | 7.4  | Heterogeneous nuclear ribonucleoprotein AB isoform a variant                                                                                                                                                                                                    |
| 1378 | Q99729-2         | 6                    | 48             | 25.3                  | 332    | 35968 | 6.9  | Isoform 2 of Q99729                                                                                                                                                                                                                                             |
| 1379 | Q9Y3A6           | 6                    | 27             | 25.3                  | 229    | 26005 | 4.8  | Transmembrane emp24 domain-containing protein 5 precursor                                                                                                                                                                                                       |
| 1380 | P08574           | 6                    | 16             | 25.2                  | 325    | 35390 | 9    | Cytochrome c1 heme protein, mitochondrial precursor                                                                                                                                                                                                             |
| 1380 | UPI000014046B    | 6                    | 16             | 25.2                  | 325    | 35422 | 9    | Cytochrome c1 heme protein, mitochondrial precursor (Cytochrome c-1).                                                                                                                                                                                           |
| 1381 | P25788-2         | 6                    | 44             | 25.8                  | 248    | 27647 | 5.3  | Isoform 2 of P25788                                                                                                                                                                                                                                             |
| 1381 | P25788           | 6                    | 44             | 25.1                  | 255    | 28433 | 5.3  | Proteasome subunit alpha type 3                                                                                                                                                                                                                                 |
| 1381 | Q6IB71           | 6                    | 44             | 25.1                  | 255    | 28415 | 5.3  | Proteasome subunit alpha type                                                                                                                                                                                                                                   |
| 1382 | Q9HCU2           | 6                    | 10             | 27.4                  | 369    | 37858 | 8.4  | RNA binding protein MCG10                                                                                                                                                                                                                                       |
| 1382 | UPI0000457119    | 6                    | 10             | 26.8                  | 377    | 38834 | 7.2  | Poly(rC)-binding protein 4 (Alpha-CP4).                                                                                                                                                                                                                         |
| 1382 | P57723           | 6                    | 10             | 25.1                  | 403    | 41482 | 8.2  | Poly(rC)-binding protein 4                                                                                                                                                                                                                                      |
| 1382 | Q9GZT1           | 6                    | 10             | 23.8                  | 424    | 43869 | 8.4  | RNA binding protein MCG10                                                                                                                                                                                                                                       |
| 1383 | O00442           | 6                    | 9              | 24.9                  | 366    | 39337 | 7.9  | RNA 3'-terminal phosphate cyclase                                                                                                                                                                                                                               |
| 1383 | Q5VSV0           | 6                    | 9              | 24                    | 379    | 40709 | 8.3  | RNA terminal phosphate cyclase domain 1                                                                                                                                                                                                                         |
| 1384 | Q13561           | 6                    | 7              | 24.9                  | 401    | 44231 | 5.2  | Dynactin subunit 2                                                                                                                                                                                                                                              |
| 1384 | UPI000045662F    | 6                    | 7              | 24.6                  | 406    | 44722 | 5.2  | Dynactin subunit 2 (Dynactin complex 50 kDa subunit) (50 kDa dynein-associated polypeptide) (p50 dynamitin) (DCTN-50).                                                                                                                                          |
| 1384 | UPI000004EFD1    | 6                    | 7              | 24.6                  | 406    | 44820 | 5.2  | dynactin 2                                                                                                                                                                                                                                                      |
| 1385 | Q59GY3           | 6                    | 34             | 30.5                  | 279    | 31865 | 11   | Arginine/serine-rich splicing factor 6 variant                                                                                                                                                                                                                  |
| 1385 | Q13247-3         | 6                    | 34             | 25.4                  | 335    | 38419 | 11   | Isoform SRP55                                                                                                                                                                                                                                                   |
| 1385 | Q13247           | 6                    | 34             | 24.7                  | 344    | 39587 | 11.4 | Splicing factor, arginine/serine-rich 6                                                                                                                                                                                                                         |
| 1386 | P50897           | 6                    | 9              | 24.5                  | 306    | 34193 | 6.5  | Palmitoyl-protein thioesterase 1 precursor                                                                                                                                                                                                                      |
| 1387 | Q86XR1           | 6                    | 25             | 25.6                  | 238    | 26108 | 9.1  | Prion protein                                                                                                                                                                                                                                                   |
| 1387 | A2A2V1           | 6                    | 25             | 24.5                  | 249    | 27279 | 9    | Prion protein                                                                                                                                                                                                                                                   |
| 1387 | A1YVW6           | 6                    | 25             | 24.1                  | 253    | 27703 | 9.1  | Prion protein                                                                                                                                                                                                                                                   |
| 1387 | Q6FGR8           | 6                    | 25             | 24.1                  | 253    | 27599 | 9.1  | PRNP protein                                                                                                                                                                                                                                                    |
| 1387 | Q6FGN5           | 6                    | 25             | 24.1                  | 253    | 27629 | 9    | Major prion protein                                                                                                                                                                                                                                             |
| 1387 | Q27H91           | 6                    | 25             | 24.1                  | 253    | 27635 | 9    | Prion protein PrP                                                                                                                                                                                                                                               |
| 1387 | P04156           | 6                    | 25             | 24.1                  | 253    | 27661 | 9    | Major prion protein precursor                                                                                                                                                                                                                                   |
| 1387 | Q6SES1           | 6                    | 25             | 22                    | 277    | 29992 | 9    | Prion protein                                                                                                                                                                                                                                                   |
| 1387 | O75942           | 6                    | 25             | 21.4                  | 285    | 30768 | 9    | Prion protein                                                                                                                                                                                                                                                   |
| 1388 | Q14192           | 6                    | 14             | 24                    | 279    | 32193 | 7.5  | Four and a half LIM domains protein 2                                                                                                                                                                                                                           |
| 1388 | Q2TSB7           | 6                    | 14             | 24                    | 279    | 32246 | 7.7  | Aging-associated gene 11                                                                                                                                                                                                                                        |
| 1388 | UPI000023C3A9    | 6                    | 14             | 18                    | 372    | 42073 | 8    | Four and a half LIM domains protein 2 (FHL-2) (Skeletal muscle LIM- protein 3) (SLIM 3) (LIM domain protein DRAL).                                                                                                                                              |
| 1388 | Q2XQU9           | 6                    | 14             | 17.2                  | 389    | 44177 | 8.1  | FHL2 isoform 5                                                                                                                                                                                                                                                  |
| 1389 | Q6FI81-3         | 6                    | 10             | 25.1                  | 299    | 32213 | 5.6  | Isoform 3 of Q6FI81                                                                                                                                                                                                                                             |
| 1389 | Q6FI81           | 6                    | 10             | 24                    | 312    | 33582 | 5.6  | Anamorsin                                                                                                                                                                                                                                                       |
| 1389 | UPI00000739FB    | 6                    | 10             | 20.4                  | 367    | 40003 | 5.8  | CPIN1_HUMAN Isoform 2 of Q6FI81 - Homo sapiens (Human)                                                                                                                                                                                                          |
| 1390 | Q9NUJ1           | 6                    | 11             | 23.9                  | 306    | 33933 | 8.6  | Abhydrolase domain-containing protein 10, mitochondrial precursor                                                                                                                                                                                               |
| 1391 | P40937           | 6                    | 12             | 23.5                  | 340    | 38497 | 7.2  | Replication factor C subunit 5                                                                                                                                                                                                                                  |

| No.  | Accession Number | Unique Peptide Count | Spectrum Count | Sequence Coverage (%) | Length | MolWt | pI  | Descriptive Name                                                                                |
|------|------------------|----------------------|----------------|-----------------------|--------|-------|-----|-------------------------------------------------------------------------------------------------|
| 1391 | Q6LES9           | 6                    | 12             | 23.5                  | 340    | 38397 | 6.9 | RFC5 protein                                                                                    |
| 1391 | Q59GW7           | 6                    | 12             | 22.8                  | 351    | 39643 | 7.8 | Replication factor C 5 isoform 1 variant                                                        |
| 1392 | P53701           | 6                    | 9              | 23.5                  | 268    | 30602 | 6.7 | Cytochrome c-type heme lyase                                                                    |
| 1392 | Q68D50           | 6                    | 9              | 23.5                  | 268    | 30529 | 7   | Hypothetical protein DKFZp77911858                                                              |
| 1393 | Q15202           | 6                    | 30             | 23.9                  | 109    | 11959 | 3.7 | Prothymosin alpha                                                                               |
| 1393 | Q8TBK9           | 6                    | 30             | 23.6                  | 110    | 12016 | 3.8 | Prothymosin, alpha                                                                              |
| 1393 | Q86YS2           | 6                    | 30             | 23.6                  | 110    | 12044 | 3.8 | Prothymosin alpha protein                                                                       |
| 1393 | Q5VYG3           | 6                    | 30             | 23.6                  | 110    | 12055 | 3.8 | OTTHUMP00000018545                                                                              |
| 1393 | Q15204           | 6                    | 30             | 23.6                  | 110    | 12047 | 3.7 | Prothymosin alpha                                                                               |
| 1393 | Q15200           | 6                    | 30             | 23.6                  | 110    | 12085 | 3.8 | Prothymosin alpha                                                                               |
| 1393 | P06454-2         | 6                    | 30             | 23.6                  | 110    | 12074 | 3.8 | Isoform 2 of P06454                                                                             |
| 1393 | P06454           | 6                    | 30             | 23.4                  | 111    | 12203 | 3.8 | Prothymosin alpha [Contains: Thymosin alpha-1]                                                  |
| 1394 | Q99426           | 6                    | 25             | 23.4                  | 244    | 27326 | 5.1 | Tubulin folding cofactor B                                                                      |
| 1395 | O75822           | 6                    | 11             | 23.3                  | 258    | 29062 | 4.8 | Eukaryotic translation initiation factor 3 subunit 1                                            |
| 1396 | Q9BQP7           | 6                    | 7              | 22.7                  | 344    | 39421 | 7.7 | Uncharacterized protein C20orf72                                                                |
| 1397 | P13716           | 6                    | 9              | 22.4                  | 330    | 36295 | 6.8 | Delta-aminolevulinic acid dehydratase                                                           |
| 1397 | UPI000042B0B5    | 6                    | 9              | 20.6                  | 359    | 39034 | 7.6 | delta-aminolevulinic acid dehydratase isoform a                                                 |
| 1397 | Q6ZMU0           | 6                    | 9              | 20.6                  | 359    | 39050 | 7.6 | CDNA FLJ16678 fis, clone TLIVE2002046, highly similar to DELTA- AMINOLEVULINIC ACID DEHYDRATASE |
| 1398 | Q9NR56           | 6                    | 7              | 22.4                  | 388    | 41817 | 8.9 | Muscleblind-like protein 1                                                                      |
| 1399 | Q9BTY7           | 6                    | 10             | 22.1                  | 390    | 42129 | 4.8 | Brain protein 16                                                                                |
| 1399 | UPI000013EBB5    | 6                    | 10             | 22.1                  | 390    | 42128 | 4.8 | PREDICTED: similar to brain protein 16                                                          |
| 1400 | O43488           | 6                    | 22             | 22                    | 359    | 39589 | 7.2 | Aflatoxin B1 aldehyde reductase member 2                                                        |
| 1401 | Q9NX62           | 6                    | 14             | 22                    | 359    | 38681 | 6.9 | CDNA FLJ20421 fis, clone KAT02467                                                               |
| 1402 | O14656           | 6                    | 6              | 21.7                  | 332    | 37809 | 7   | Torsin A precursor                                                                              |
| 1402 | UPI00004577BB    | 6                    | 6              | 21.7                  | 332    | 37812 | 7.2 | Torsin A precursor (Torsin family 1 member A) (Dystonia 1 protein).                             |
| 1403 | O95433           | 6                    | 18             | 21.3                  | 338    | 38274 | 5.5 | Activator of 90 kDa heat shock protein ATPase homolog 1                                         |
| 1404 | Q9BUB1           | 6                    | 12             | 22.5                  | 382    | 43067 | 5.1 | PRKAR2A protein                                                                                 |
| 1404 | P13861           | 6                    | 12             | 21.3                  | 404    | 45518 | 5.1 | cAMP-dependent protein kinase type II-alpha regulatory subunit                                  |
| 1405 | Q9BXY0           | 6                    | 6              | 21.3                  | 300    | 35369 | 5.4 | MAK16-like protein RBM13                                                                        |
| 1406 | A0PJ79           | 6                    | 7              | 20.9                  | 302    | 34446 | 9.4 | Hypothetical protein                                                                            |
| 1406 | UPI0000D61582    | 6                    | 7              | 20.8                  | 303    | 34492 | 8.1 | 39S ribosomal protein L1, mitochondrial precursor (L1mt) (MRP-L1).                              |
| 1406 | Q9BYD6           | 6                    | 7              | 20.8                  | 303    | 34453 | 8.1 | 39S ribosomal protein L1, mitochondrial precursor                                               |
| 1407 | Q6IAE8           | 6                    | 7              | 20.2                  | 307    | 33865 | 6.3 | C6orf55 protein                                                                                 |
| 1407 | Q9NP79           | 6                    | 7              | 20.2                  | 307    | 33879 | 6.3 | Uncharacterized protein C6orf55                                                                 |
| 1408 | Q7LDY7           | 6                    | 21             | 20.1                  | 453    | 48755 | 9   | Alpha-KG-E2                                                                                     |
| 1409 | Q6IPC0           | 6                    | 11             | 20.1                  | 453    | 49702 | 5.1 | Protein phosphatase 1F                                                                          |
| 1409 | P49593           | 6                    | 11             | 20                    | 454    | 49831 | 5.1 | Ca(2+)/calmodulin-dependent protein kinase phosphatase                                          |
| 1410 | P80303           | 6                    | 16             | 19.8                  | 420    | 50223 | 5.1 | Nucleobindin-2 precursor                                                                        |
| 1411 | P17050           | 6                    | 11             | 19.7                  | 411    | 46565 | 5.2 | Alpha-N-acetylgalactosaminidase precursor                                                       |
| 1412 | Q53FV3           | 6                    | 8              | 19.7                  | 406    | 46268 | 6.1 | COP9 signalosome subunit 4 variant                                                              |
| 1412 | Q9BT78           | 6                    | 8              | 19.7                  | 406    | 46269 | 5.8 | COP9 signalosome complex subunit 4                                                              |
| 1413 | Q53T59           | 6                    | 9              | 19.6                  | 392    | 42780 | 5   | HCLS1-binding protein 3                                                                         |
| 1413 | Q86VC2           | 6                    | 9              | 19.6                  | 392    | 42842 | 5   | HCLS1 binding protein 3                                                                         |
| 1414 | O96019           | 6                    | 10             | 19.3                  | 429    | 47461 | 5.6 | Actin-like protein 6A                                                                           |
| 1414 | Q6FI97           | 6                    | 10             | 19.3                  | 429    | 47381 | 5.7 | BAF53A protein                                                                                  |
| 1414 | Q53FS0           | 6                    | 10             | 19.3                  | 429    | 47481 | 5.7 | Actin-like 6A isoform 1 variant                                                                 |
| 1415 | P10644           | 6                    | 9              | 18.9                  | 381    | 42982 | 5.3 | cAMP-dependent protein kinase type I-alpha regulatory subunit                                   |
| 1415 | Q68DQ4           | 6                    | 9              | 18.9                  | 381    | 42948 | 5.3 | Hypothetical protein DKFZp779L0468                                                              |
| 1416 | Q53H12           | 6                    | 12             | 18.7                  | 422    | 47137 | 8.1 | Acylglycerol kinase, mitochondrial precursor                                                    |
| 1417 | Q5JB52           | 6                    | 8              | 19.7                  | 508    | 56467 | 7.6 | Stromal RNA regulating factor                                                                   |
| 1417 | Q5JB51           | 6                    | 8              | 18.6                  | 537    | 59648 | 7.7 | Stromal RNA regulating factor                                                                   |
| 1417 | Q8WVV9           | 6                    | 8              | 18.5                  | 542    | 60083 | 7.7 | Heterogeneous nuclear ribonucleoprotein L-like                                                  |
| 1418 | P30740           | 6                    | 10             | 18.5                  | 379    | 42742 | 6.3 | Leukocyte elastase inhibitor                                                                    |
| 1419 | P36551           | 6                    | 9              | 18.5                  | 454    | 50152 | 8.3 | Coproporphyrinogen III oxidase, mitochondrial precursor                                         |
| 1419 | Q53F08           | 6                    | 9              | 18.5                  | 454    | 50166 | 8.3 | Coproporphyrinogen oxidase variant                                                              |
| 1420 | Q7Z426           | 6                    | 23             | 18.2                  | 396    | 43006 | 5.2 | Putative MAPK activating protein                                                                |
| 1420 | Q969I2           | 6                    | 23             | 18                    | 400    | 43448 | 5.1 | TRK-fused gene                                                                                  |
| 1420 | Q92734           | 6                    | 23             | 18                    | 400    | 43434 | 5.1 | Protein TFG                                                                                     |
| 1421 | UPI0000202E29    | 6                    | 29             | 33.7                  | 205    | 22764 | 5.5 | basigin isoform 4                                                                               |
| 1421 | P35613           | 6                    | 29             | 17.9                  | 385    | 42200 | 5.7 | Basigin precursor                                                                               |
| 1422 | Q5U0E6           | 6                    | 12             | 17.9                  | 431    | 47913 | 5.4 | Serine/threonine kinase 24                                                                      |
| 1422 | Q6P0Y1           | 6                    | 12             | 17.9                  | 431    | 47941 | 5.4 | Serine/threonine kinase 24                                                                      |
| 1422 | Q6FG81           | 6                    | 12             | 17.9                  | 431    | 47879 | 5.4 | STK24 protein                                                                                   |
| 1422 | Q9Y6E0           | 6                    | 12             | 17.4                  | 443    | 49308 | 5.7 | Serine/threonine-protein kinase 24                                                              |
| 1423 | Q9NZ01           | 6                    | 49             | 17.5                  | 308    | 36034 | 9.4 | Synaptic glycoprotein SC2                                                                       |
| 1424 | Q13685           | 6                    | 10             | 17.1                  | 434    | 46751 | 4.4 | Angio-associated migratory cell protein                                                         |
| 1425 | Q0VDF9           | 6                    | 8              | 16.9                  | 509    | 54795 | 5.6 | Heat shock 70 kDa protein 14                                                                    |
| 1425 | Q9UI07           | 6                    | 8              | 16.9                  | 509    | 54778 | 5.6 | Heat shock protein hsp70-related protein                                                        |
| 1425 | Q9P0X2           | 6                    | 8              | 16.9                  | 509    | 54824 | 5.5 | Heat shock protein HSP60                                                                        |

| No.  | Accession Number | Unique Peptide Count | Spectrum Count | Sequence Coverage (%) | Length | MolWt | pI   | Descriptive Name                                                                                                                                                                                                  |
|------|------------------|----------------------|----------------|-----------------------|--------|-------|------|-------------------------------------------------------------------------------------------------------------------------------------------------------------------------------------------------------------------|
| 1426 | Q8NB01           | 6                    | 22             | 17.3                  | 388    | 44997 | 5.5  | CDNA FLJ34453 fis, clone HLUNG2002429, highly similar to Homo sapiens cartilage-associated protein                                                                                                                |
| 1426 | O75718           | 6                    | 22             | 16.7                  | 401    | 46562 | 5.7  | Cartilage-associated protein precursor                                                                                                                                                                            |
| 1426 | UPI0000D61AEC    | 6                    | 22             | 16.6                  | 404    | 46847 | 5.7  | Cartilage-associated protein precursor.                                                                                                                                                                           |
| 1427 | Q9UKX7           | 6                    | 10             | 16.7                  | 468    | 50144 | 7.1  | Nucleoporin 50 kDa                                                                                                                                                                                                |
| 1428 | Q9H3P7           | 6                    | 7              | 16.5                  | 528    | 60593 | 5.1  | Golgi resident protein GCP60                                                                                                                                                                                      |
| 1429 | UPI00005A6C9C    | 6                    | 7              | 17.6                  | 459    | 52386 | 5.8  | ubiquitin specific protease 14 isoform b                                                                                                                                                                          |
| 1429 | P54578           | 6                    | 7              | 16.4                  | 494    | 56069 | 5.3  | Ubiquitin carboxyl-terminal hydrolase 14                                                                                                                                                                          |
| 1430 | Q96KP4           | 6                    | 10             | 16.4                  | 475    | 52878 | 6    | Cytosolic nonspecific dipeptidase                                                                                                                                                                                 |
| 1430 | UPI0000D60EF3    | 6                    | 10             | 16.4                  | 475    | 52897 | 6    | Cytosolic nonspecific dipeptidase (Glutamate carboxypeptidase-like protein 1) (CNDP dipeptidase 2).                                                                                                               |
| 1430 | UPI0000049A46    | 6                    | 10             | 16.4                  | 475    | 52779 | 5.9  | CNDP dipeptidase 2 (metallopeptidase M20 family)                                                                                                                                                                  |
| 1431 | UPI0000D625AE    | 6                    | 19             | 16.2                  | 555    | 60357 | 6.4  | Tripeptidyl-peptidase 1 precursor (EC 3.4.14.9) (Tripeptidyl-peptidase I) (TPP-1) (TPP-I) (Tripeptidyl aminopeptidase) (Lysosomal pepstatin insensitive protease) (LPIC) (Cell growth-inhibiting gene 1 protein). |
| 1431 | O14773-3         | 6                    | 19             | 16.2                  | 556    | 60458 | 6.4  | Isoform 3 of O14773                                                                                                                                                                                               |
| 1431 | O14773           | 6                    | 19             | 16                    | 563    | 61248 | 6.5  | Tripeptidyl-peptidase 1 precursor                                                                                                                                                                                 |
| 1431 | Q53HP2           | 6                    | 19             | 16                    | 563    | 61213 | 6.5  | Tripeptidyl-peptidase I variant                                                                                                                                                                                   |
| 1432 | Q9HB40           | 6                    | 18             | 15.9                  | 452    | 50831 | 5.8  | Retinoid-inducible serine carboxypeptidase precursor                                                                                                                                                              |
| 1433 | O75844           | 6                    | 19             | 15.8                  | 475    | 54813 | 7.5  | CAAX prenyl protease 1 homolog                                                                                                                                                                                    |
| 1434 | Q16719           | 6                    | 11             | 15.7                  | 465    | 52352 | 7    | Kynureninase                                                                                                                                                                                                      |
| 1434 | Q53F63           | 6                    | 11             | 15.7                  | 465    | 52325 | 6.8  | Kynureninase (L-kynurenine hydrolase) variant                                                                                                                                                                     |
| 1435 | P26440           | 6                    | 8              | 15.6                  | 423    | 46319 | 8.2  | Isovaleryl-CoA dehydrogenase, mitochondrial precursor                                                                                                                                                             |
| 1435 | Q53XZ9           | 6                    | 8              | 15.6                  | 423    | 46236 | 8.2  | Isovaleryl Coenzyme A dehydrogenase                                                                                                                                                                               |
| 1436 | O60832           | 6                    | 11             | 15.4                  | 514    | 57674 | 9.4  | H/ACA ribonucleoprotein complex subunit 4                                                                                                                                                                         |
| 1437 | Q53G15           | 6                    | 16             | 15.4                  | 408    | 47169 | 10.3 | DEAD (Asp-Glu-Ala-Asp) box polypeptide 27 variant                                                                                                                                                                 |
| 1437 | UPI0000161F44    | 6                    | 16             | 7.9                   | 796    | 89865 | 9.3  | DEAD (Asp-Glu-Ala-Asp) box polypeptide 27                                                                                                                                                                         |
| 1437 | Q96GQ7           | 6                    | 16             | 7.9                   | 796    | 89835 | 9.3  | Probable ATP-dependent RNA helicase DDX27                                                                                                                                                                         |
| 1438 | Q7LOY3           | 6                    | 7              | 15.4                  | 397    | 46685 | 9.3  | RG9MTD1 protein                                                                                                                                                                                                   |
| 1438 | Q9NRG5           | 6                    | 7              | 15.1                  | 403    | 47347 | 9.4  | RNA (guanine-9-) methyltransferase domain-containing protein 1                                                                                                                                                    |
| 1439 | P49023-2         | 6                    | 7              | 16.2                  | 557    | 60937 | 6.4  | Isoform Alpha of P49023                                                                                                                                                                                           |
| 1439 | UPI00001AE664    | 6                    | 7              | 15.3                  | 587    | 64031 | 6.4  | Paxillin.                                                                                                                                                                                                         |
| 1439 | P49023           | 6                    | 7              | 15.2                  | 591    | 64533 | 6.1  | Paxillin.                                                                                                                                                                                                         |
| 1439 | UPI0000D62268    | 6                    | 7              | 15                    | 601    | 65738 | 6.5  | Paxillin.                                                                                                                                                                                                         |
| 1439 | P49023-3         | 6                    | 7              | 14.9                  | 605    | 66183 | 6.4  | Isoform Gamma of P49023                                                                                                                                                                                           |
| 1440 | Q96JJ7           | 6                    | 13             | 15.2                  | 454    | 51872 | 4.9  | Protein disulfide-isomerase TXNDC10 precursor                                                                                                                                                                     |
| 1441 | Q9H857-2         | 6                    | 10             | 16.3                  | 486    | 57204 | 7.1  | Isoform 2 of Q9H857                                                                                                                                                                                               |
| 1441 | Q9H857           | 6                    | 10             | 15.2                  | 520    | 60719 | 6.8  | 5'-nucleotidase domain-containing protein 2                                                                                                                                                                       |
| 1442 | Q05DA4           | 6                    | 10             | 16.1                  | 504    | 57378 | 5.6  | P4HA2 protein                                                                                                                                                                                                     |
| 1442 | Q5HYD8           | 6                    | 10             | 15.2                  | 533    | 60617 | 5.7  | Hypothetical protein DKFZp686M0919                                                                                                                                                                                |
| 1442 | O15460-2         | 6                    | 10             | 15.2                  | 533    | 60633 | 5.7  | Isoform IIa of O15460                                                                                                                                                                                             |
| 1442 | O15460           | 6                    | 10             | 15.1                  | 535    | 60902 | 5.7  | Prolyl 4-hydroxylase subunit alpha-2 precursor                                                                                                                                                                    |
| 1443 | P15586           | 6                    | 13             | 14.9                  | 552    | 62082 | 8.3  | N-acetylglucosamine-6-sulfatase precursor                                                                                                                                                                         |
| 1444 | P49189           | 6                    | 12             | 14.8                  | 494    | 53802 | 5.9  | 4-trimethylaminobutylaldehyde dehydrogenase                                                                                                                                                                       |
| 1445 | Q9NR12           | 6                    | 13             | 14.7                  | 457    | 49845 | 8.4  | PDZ and LIM domain protein 7                                                                                                                                                                                      |
| 1446 | P11172           | 6                    | 15             | 14.4                  | 480    | 52222 | 7.2  | Uridine 5'-monophosphate synthase (UMP synthase) [Includes: Orotate phosphoribosyltransferase (EC 2.4.2.10) (OPRTase); Orotidine 5'- phosphate decarboxylase (EC 4.1.1.23) (OMPdecase)]                           |
| 1447 | Q9BRD2           | 6                    | 89             | 19.2                  | 308    | 33376 | 8.4  | LAMP1 protein                                                                                                                                                                                                     |
| 1447 | Q9NP13           | 6                    | 89             | 16.6                  | 355    | 38358 | 8.2  | Lysosomal-associated membrane glycoprotein-1                                                                                                                                                                      |
| 1447 | P11279           | 6                    | 89             | 14.2                  | 416    | 44773 | 9.1  | Lysosome-associated membrane glycoprotein 1 precursor                                                                                                                                                             |
| 1447 | UPI000049DDA7    | 6                    | 89             | 14.2                  | 415    | 44591 | 8.9  | Lysosome-associated membrane glycoprotein 1 precursor (LAMP-1) (CD107a antigen).                                                                                                                                  |
| 1447 | Q8WU33           | 6                    | 89             | 14.1                  | 417    | 44882 | 8.7  | Lysosomal-associated membrane protein 1                                                                                                                                                                           |
| 1448 | P12955           | 6                    | 10             | 13.6                  | 493    | 54548 | 6    | Xaa-Pro dipeptidase                                                                                                                                                                                               |
| 1449 | Q14108           | 6                    | 49             | 13.6                  | 478    | 54290 | 5.1  | Lysosome membrane protein 2                                                                                                                                                                                       |
| 1450 | Q8NHP8           | 6                    | 23             | 13.4                  | 589    | 65472 | 7    | Hypothetical protein LOC196463                                                                                                                                                                                    |
| 1450 | UPI000013DC40    | 6                    | 23             | 13.4                  | 589    | 65472 | 6.8  | UPI000013DC40 UniRef100 entry                                                                                                                                                                                     |
| 1451 | Q9BXS5           | 6                    | 11             | 14.7                  | 423    | 48587 | 7.3  | AP-1 complex subunit mu-1                                                                                                                                                                                         |
| 1451 | Q59EK3           | 6                    | 11             | 13.3                  | 466    | 53263 | 8.9  | Adaptor-related protein complex 1, mu 1 subunit variant                                                                                                                                                           |

| No.  | Accession Number | Unique Peptide Count | Spectrum Count | Sequence Coverage (%) | Length | MolWt  | pI   | Descriptive Name                                                                                                                                                                                                                                                                                                                                                                                                                                |
|------|------------------|----------------------|----------------|-----------------------|--------|--------|------|-------------------------------------------------------------------------------------------------------------------------------------------------------------------------------------------------------------------------------------------------------------------------------------------------------------------------------------------------------------------------------------------------------------------------------------------------|
| 1452 | O95340           | 6                    | 12             | 13.2                  | 614    | 69501  | 8    | Bifunctional 3'-phosphoadenosine 5'-phosphosulfate synthetase 2 (PAPS synthetase 2) (PAPSS 2) (Sulfurylase kinase 2) (SK2) (SK 2) [Includes: Sulfate adenylyltransferase (EC 2.7.7.4) (Sulfate adenylyltransferase) (SAT) (ATP-sulfurylase); Adenylyl-sulfate kinase (EC 2.7.1.25) (Adenylylsulfate 3'-phosphotransferase) (APS kinase) (Adenosine-5'-phosphosulfate 3'-phosphotransferase) (3'-phosphoadenosine-5'-phosphosulfate synthetase)] |
| 1452 | UPI000049DD01    | 6                    | 12             | 13.1                  | 619    | 70062  | 8.2  | Bifunctional 3'-phosphoadenosine 5'-phosphosulfate synthetase 2 (PAPS synthetase 2) (PAPSS 2) (Sulfurylase kinase 2) (SK2) (SK 2) [Includes: Sulfate adenylyltransferase (EC 2.7.7.4) (Sulfate adenylyltransferase) (SAT) (ATP-sulfurylase); Adenylyl-sulfate                                                                                                                                                                                   |
| 1452 | O95340-2         | 6                    | 12             | 13.1                  | 619    | 69970  | 8    | Isoform B of O95340                                                                                                                                                                                                                                                                                                                                                                                                                             |
| 1453 | Q86VD2           | 6                    | 7              | 13.3                  | 851    | 96061  | 6.6  | Dynamin 1                                                                                                                                                                                                                                                                                                                                                                                                                                       |
| 1453 | Q6P3T6           | 6                    | 7              | 13.3                  | 851    | 96041  | 7    | Dynamin 1                                                                                                                                                                                                                                                                                                                                                                                                                                       |
| 1453 | Q05193           | 6                    | 7              | 13.1                  | 864    | 97407  | 7.3  | Dynamin-1                                                                                                                                                                                                                                                                                                                                                                                                                                       |
| 1453 | Q5SYX2           | 6                    | 7              | 13.1                  | 864    | 97408  | 7.2  | Dynamin 1                                                                                                                                                                                                                                                                                                                                                                                                                                       |
| 1454 | P08240           | 6                    | 9              | 12.5                  | 638    | 69811  | 9    | Signal recognition particle receptor subunit alpha                                                                                                                                                                                                                                                                                                                                                                                              |
| 1454 | Q6IAX9           | 6                    | 9              | 12.5                  | 638    | 69894  | 9    | SRPR protein                                                                                                                                                                                                                                                                                                                                                                                                                                    |
| 1455 | Q9H8H0           | 6                    | 8              | 12.5                  | 719    | 81124  | 6.1  | Nucleolar protein 11                                                                                                                                                                                                                                                                                                                                                                                                                            |
| 1456 | Q86YM9           | 6                    | 11             | 20.2                  | 435    | 47714  | 4.7  | Calpastatin                                                                                                                                                                                                                                                                                                                                                                                                                                     |
| 1456 | P20810-3         | 6                    | 11             | 14.9                  | 590    | 63666  | 4.8  | Isoform 3 of P20810                                                                                                                                                                                                                                                                                                                                                                                                                             |
| 1456 | Q7Z4K0           | 6                    | 11             | 13.2                  | 667    | 71895  | 4.9  | Calpastatin                                                                                                                                                                                                                                                                                                                                                                                                                                     |
| 1456 | UPI0000DA4C5C    | 6                    | 11             | 13.1                  | 673    | 72799  | 5    | calpastatin isoform k                                                                                                                                                                                                                                                                                                                                                                                                                           |
| 1456 | P20810-2         | 6                    | 11             | 12.7                  | 695    | 75305  | 5.1  | Isoform 2 of P20810                                                                                                                                                                                                                                                                                                                                                                                                                             |
| 1456 | P20810           | 6                    | 11             | 12.4                  | 708    | 76573  | 5.1  | Calpastatin                                                                                                                                                                                                                                                                                                                                                                                                                                     |
| 1456 | UPI0000DA4C59    | 6                    | 11             | 11.7                  | 750    | 80265  | 5.1  | calpastatin isoform f                                                                                                                                                                                                                                                                                                                                                                                                                           |
| 1456 | UPI0000DA4C58    | 6                    | 11             | 11.6                  | 756    | 81169  | 5.2  | calpastatin isoform e                                                                                                                                                                                                                                                                                                                                                                                                                           |
| 1456 | UPI0000DA4C5B    | 6                    | 11             | 11.4                  | 769    | 82437  | 5.2  | calpastatin isoform h                                                                                                                                                                                                                                                                                                                                                                                                                           |
| 1456 | UPI0000DA4C5A    | 6                    | 11             | 11.4                  | 772    | 82771  | 5.3  | calpastatin isoform g                                                                                                                                                                                                                                                                                                                                                                                                                           |
| 1457 | UPI0000D610D0    | 6                    | 9              | 12.7                  | 387    | 40237  | 5.1  | Adhesion-regulating molecule 1 precursor (110 kDa cell membrane glycoprotein) (Gp110).                                                                                                                                                                                                                                                                                                                                                          |
| 1457 | Q16186           | 6                    | 9              | 12                    | 407    | 42153  | 5.1  | Adhesion-regulating molecule 1 precursor                                                                                                                                                                                                                                                                                                                                                                                                        |
| 1458 | Q6P996           | 6                    | 7              | 12.2                  | 788    | 86708  | 5.3  | KIAA0251 protein                                                                                                                                                                                                                                                                                                                                                                                                                                |
| 1458 | O00236           | 6                    | 7              | 11.7                  | 820    | 90027  | 5.5  | KIAA0251 protein                                                                                                                                                                                                                                                                                                                                                                                                                                |
| 1459 | Q9P258           | 6                    | 12             | 11.5                  | 522    | 56085  | 8.8  | Protein RCC2                                                                                                                                                                                                                                                                                                                                                                                                                                    |
| 1460 | Q6DCA8           | 6                    | 25             | 11.3                  | 680    | 77948  | 10.2 | BCLAF1 protein                                                                                                                                                                                                                                                                                                                                                                                                                                  |
| 1460 | Q9NYF8-4         | 6                    | 25             | 10.3                  | 747    | 85937  | 10.4 | Isoform 4 of Q9NYF8                                                                                                                                                                                                                                                                                                                                                                                                                             |
| 1460 | UPI00004574B1    | 6                    | 25             | 8.9                   | 869    | 100202 | 10   | Bcl-2-associated transcription factor 1 (Btf).                                                                                                                                                                                                                                                                                                                                                                                                  |
| 1460 | Q9NYF8-3         | 6                    | 25             | 8.9                   | 869    | 100232 | 10   | Isoform 3 of Q9NYF8                                                                                                                                                                                                                                                                                                                                                                                                                             |
| 1460 | Q9NYF8-2         | 6                    | 25             | 8.4                   | 918    | 105948 | 10   | Isoform 2 of Q9NYF8                                                                                                                                                                                                                                                                                                                                                                                                                             |
| 1460 | Q9NYF8           | 6                    | 25             | 8.4                   | 920    | 106122 | 10   | Bcl-2-associated transcription factor 1                                                                                                                                                                                                                                                                                                                                                                                                         |
| 1461 | A2A2P8           | 6                    | 9              | 11.2                  | 662    | 73333  | 6.5  | Adducin 1                                                                                                                                                                                                                                                                                                                                                                                                                                       |
| 1461 | P35611           | 6                    | 9              | 10                    | 737    | 80955  | 5.8  | Alpha-adducin                                                                                                                                                                                                                                                                                                                                                                                                                                   |
| 1461 | P35611-3         | 6                    | 9              | 9.6                   | 768    | 84303  | 6    | Isoform 3 of P35611                                                                                                                                                                                                                                                                                                                                                                                                                             |
| 1462 | P50443           | 6                    | 26             | 11                    | 739    | 81649  | 8.4  | Sulfate transporter                                                                                                                                                                                                                                                                                                                                                                                                                             |
| 1462 | UPI000013DE3D    | 6                    | 26             | 11                    | 739    | 81662  | 8.4  | solute carrier family 26 member 2                                                                                                                                                                                                                                                                                                                                                                                                               |
| 1463 | O95394           | 6                    | 6              | 10.7                  | 542    | 59852  | 6.3  | Phosphoacetylglucosamine mutase                                                                                                                                                                                                                                                                                                                                                                                                                 |
| 1464 | O76031           | 6                    | 9              | 10.6                  | 633    | 69224  | 7.6  | ATP-dependent Clp protease ATP-binding subunit ClpX-like, mitochondrial precursor                                                                                                                                                                                                                                                                                                                                                               |
| 1465 | P52888           | 6                    | 9              | 10.4                  | 689    | 78840  | 6    | Thimet oligopeptidase                                                                                                                                                                                                                                                                                                                                                                                                                           |
| 1465 | Q96CV8           | 6                    | 9              | 10.4                  | 689    | 78824  | 6    | Thimet oligopeptidase 1                                                                                                                                                                                                                                                                                                                                                                                                                         |
| 1466 | Q06124-2         | 6                    | 8              | 10.5                  | 593    | 68011  | 7.3  | Isoform 2 of Q06124                                                                                                                                                                                                                                                                                                                                                                                                                             |
| 1466 | Q06124           | 6                    | 8              | 10.4                  | 597    | 68436  | 7.3  | Tyrosine-protein phosphatase non-receptor type 11                                                                                                                                                                                                                                                                                                                                                                                               |
| 1467 | Q13724           | 6                    | 45             | 10.2                  | 837    | 91918  | 8.9  | Mannosyl-oligosaccharide glucosidase                                                                                                                                                                                                                                                                                                                                                                                                            |
| 1468 | Q5RF14           | 6                    | 8              | 10.2                  | 713    | 80478  | 7.2  | Hypothetical protein DKFZp469L1232                                                                                                                                                                                                                                                                                                                                                                                                              |
| 1468 | Q99797           | 6                    | 8              | 10.2                  | 713    | 80612  | 7.2  | Mitochondrial intermediate peptidase, mitochondrial precursor                                                                                                                                                                                                                                                                                                                                                                                   |
| 1468 | Q96G65           | 6                    | 8              | 10.2                  | 713    | 80611  | 7    | Mitochondrial intermediate peptidase                                                                                                                                                                                                                                                                                                                                                                                                            |
| 1468 | Q5T9Q9           | 6                    | 8              | 10.2                  | 713    | 80641  | 7    | Mitochondrial intermediate peptidase                                                                                                                                                                                                                                                                                                                                                                                                            |
| 1469 | P40222           | 6                    | 15             | 9.9                   | 546    | 61891  | 6.5  | Alpha-taxilin                                                                                                                                                                                                                                                                                                                                                                                                                                   |
| 1470 | Q9NTJ5           | 6                    | 18             | 10.1                  | 587    | 66979  | 7.3  | Hypothetical protein DKFZp434O1328                                                                                                                                                                                                                                                                                                                                                                                                              |
| 1470 | Q96AX7           | 6                    | 18             | 10.1                  | 587    | 66951  | 7.1  | SAC1 suppressor of actin mutations 1-like                                                                                                                                                                                                                                                                                                                                                                                                       |
| 1470 | O94935           | 6                    | 18             | 9.7                   | 607    | 69474  | 8    | SAC1 suppressor of actin mutations 1-like protein                                                                                                                                                                                                                                                                                                                                                                                               |
| 1471 | P53794           | 6                    | 15             | 9.7                   | 718    | 79694  | 7.3  | Sodium/myo-inositol cotransporter (Na(+)/myo-inositol cotransporter)                                                                                                                                                                                                                                                                                                                                                                            |
| 1472 | Q12884           | 6                    | 13             | 9.6                   | 760    | 87794  | 6.8  | Seprase                                                                                                                                                                                                                                                                                                                                                                                                                                         |
| 1472 | Q53TP5           | 6                    | 13             | 9.6                   | 760    | 87713  | 6.6  | Hypothetical protein FAP                                                                                                                                                                                                                                                                                                                                                                                                                        |
| 1473 | A2RRF3           | 6                    | 7              | 9.2                   | 754    | 83248  | 5.1  | EPS15L1 protein                                                                                                                                                                                                                                                                                                                                                                                                                                 |
| 1473 | Q9UBC2           | 6                    | 7              | 8                     | 864    | 94255  | 5.1  | Epidermal growth factor receptor substrate 15-like 1                                                                                                                                                                                                                                                                                                                                                                                            |
| 1474 | Q53H65           | 6                    | 9              | 9.2                   | 759    | 85666  | 9.2  | RNA binding motif protein 28 variant                                                                                                                                                                                                                                                                                                                                                                                                            |
| 1474 | UPI000006F4A6    | 6                    | 9              | 9.2                   | 759    | 85766  | 9.2  | RNA binding motif protein 28                                                                                                                                                                                                                                                                                                                                                                                                                    |
| 1474 | Q9NW13           | 6                    | 9              | 9.2                   | 759    | 85738  | 9.2  | RNA-binding protein 28                                                                                                                                                                                                                                                                                                                                                                                                                          |
| 1475 | Q6GSC0           | 6                    | 19             | 9.3                   | 751    | 84819  | 4.8  | Amyloid beta (A4) protein                                                                                                                                                                                                                                                                                                                                                                                                                       |

| No.  | Accession Number | Unique Peptide Count | Spectrum Count | Sequence Coverage (%) | Length | MolWt  | pI  | Descriptive Name                                                                                                                                                                                                                                                                                                                                                                                                                                                                                                                                                                                                                                                                                          |
|------|------------------|----------------------|----------------|-----------------------|--------|--------|-----|-----------------------------------------------------------------------------------------------------------------------------------------------------------------------------------------------------------------------------------------------------------------------------------------------------------------------------------------------------------------------------------------------------------------------------------------------------------------------------------------------------------------------------------------------------------------------------------------------------------------------------------------------------------------------------------------------------------|
| 1475 | P05067           | 6                    | 19             | 9.1                   | 770    | 86943  | 4.8 | Amyloid beta A4 protein precursor (APP) (ABPP) (Alzheimer disease amyloid protein) (Cerebral vascular amyloid peptide) (CVAP) (Protease nexin-II) (PN-II) (APPI) (PreA4) [Contains: Soluble APP-alpha (S-APP- alpha); Soluble APP-beta (S-APP-beta); C99; Beta-amyloid protein 42 (Beta-APP42); Beta-amyloid protein 40 (Beta-APP40); C83; P3(42); P3(40); Gamma-CTF(59) (Gamma-secretase C-terminal fragment 59) (Amyloid intracellular domain 59) (AID(59)) (AICD-59); Gamma-CTF(57) (Gamma-secretase C-terminal fragment 57) (Amyloid intracellular domain 57) (AID(57)) (AICD-57); Gamma-CTF(50) (Gamma-secretase C-terminal fragment 50) (Amyloid intracellular domain 50) (AID(50)) (AICD-50); C31] |
| 1476 | P11166           | 6                    | 65             | 9.1                   | 492    | 54084  | 8.7 | Solute carrier family 2, facilitated glucose transporter member 1                                                                                                                                                                                                                                                                                                                                                                                                                                                                                                                                                                                                                                         |
| 1476 | UPI000004F0B2    | 6                    | 65             | 9.1                   | 492    | 54118  | 8.7 | solute carrier family 2 (facilitated glucose transporter), member 1                                                                                                                                                                                                                                                                                                                                                                                                                                                                                                                                                                                                                                       |
| 1476 | Q0P512           | 6                    | 65             | 9.1                   | 492    | 54054  | 8.9 | Solute carrier family 2 (Facilitated glucose transporter), member 1                                                                                                                                                                                                                                                                                                                                                                                                                                                                                                                                                                                                                                       |
| 1477 | P58215           | 6                    | 14             | 9                     | 753    | 83166  | 6.9 | Lysyl oxidase homolog 3 precursor                                                                                                                                                                                                                                                                                                                                                                                                                                                                                                                                                                                                                                                                         |
| 1478 | Q9UHB6-2         | 6                    | 10             | 11.4                  | 599    | 67120  | 5.9 | Isoform Alpha of Q9UHB6                                                                                                                                                                                                                                                                                                                                                                                                                                                                                                                                                                                                                                                                                   |
| 1478 | Q53GG0           | 6                    | 10             | 9                     | 759    | 85254  | 6.8 | Epithelial protein lost in neoplasm beta variant                                                                                                                                                                                                                                                                                                                                                                                                                                                                                                                                                                                                                                                          |
| 1478 | Q9UHB6           | 6                    | 10             | 9                     | 759    | 85226  | 6.8 | LIM domain and actin-binding protein 1                                                                                                                                                                                                                                                                                                                                                                                                                                                                                                                                                                                                                                                                    |
| 1478 | Q59FE8           | 6                    | 10             | 8.8                   | 769    | 86107  | 6.8 | Epithelial protein lost in neoplasm beta variant                                                                                                                                                                                                                                                                                                                                                                                                                                                                                                                                                                                                                                                          |
| 1479 | Q8N556           | 6                    | 18             | 9                     | 730    | 80741  | 8.6 | Actin filament associated protein 1                                                                                                                                                                                                                                                                                                                                                                                                                                                                                                                                                                                                                                                                       |
| 1479 | UPI0000233618    | 6                    | 18             | 9                     | 730    | 80725  | 8.7 | actin filament associated protein 1                                                                                                                                                                                                                                                                                                                                                                                                                                                                                                                                                                                                                                                                       |
| 1479 | Q9HBY1           | 6                    | 18             | 9                     | 730    | 80727  | 8.7 | Actin filament associated protein                                                                                                                                                                                                                                                                                                                                                                                                                                                                                                                                                                                                                                                                         |
| 1480 | P13798           | 6                    | 10             | 8.9                   | 732    | 81225  | 5.5 | Acylamino-acid-releasing enzyme                                                                                                                                                                                                                                                                                                                                                                                                                                                                                                                                                                                                                                                                           |
| 1481 | Q92615           | 6                    | 8              | 8.9                   | 738    | 80552  | 6.9 | La-related protein 5                                                                                                                                                                                                                                                                                                                                                                                                                                                                                                                                                                                                                                                                                      |
| 1481 | UPI000046FFBF    | 6                    | 8              | 8.9                   | 743    | 81090  | 7.1 | La ribonucleoprotein domain family, member 5                                                                                                                                                                                                                                                                                                                                                                                                                                                                                                                                                                                                                                                              |
| 1481 | UPI0000456346    | 6                    | 8              | 8.8                   | 753    | 82204  | 6.8 | La ribonucleoprotein domain family, member 5                                                                                                                                                                                                                                                                                                                                                                                                                                                                                                                                                                                                                                                              |
| 1482 | Q9BWU0           | 6                    | 7              | 8.7                   | 796    | 88814  | 5.2 | Kanadaplin                                                                                                                                                                                                                                                                                                                                                                                                                                                                                                                                                                                                                                                                                                |
| 1482 | UPI0000D6117A    | 6                    | 7              | 8.6                   | 798    | 89014  | 5.2 | Kanadaplin (Kidney anion exchanger adapter protein) (Solute carrier family 4 anion exchanger member 1 adapter protein) (Lung cancer oncogene 3 protein).                                                                                                                                                                                                                                                                                                                                                                                                                                                                                                                                                  |
| 1483 | Q13618-2         | 6                    | 16             | 8.9                   | 744    | 86234  | 8   | Isoform 2 of Q13618                                                                                                                                                                                                                                                                                                                                                                                                                                                                                                                                                                                                                                                                                       |
| 1483 | Q13618           | 6                    | 16             | 8.6                   | 768    | 88930  | 8.5 | Cullin-3                                                                                                                                                                                                                                                                                                                                                                                                                                                                                                                                                                                                                                                                                                  |
| 1484 | Q92888           | 6                    | 13             | 8.6                   | 912    | 102435 | 5.7 | Rho guanine nucleotide exchange factor 1                                                                                                                                                                                                                                                                                                                                                                                                                                                                                                                                                                                                                                                                  |
| 1485 | Q6P179           | 6                    | 8              | 8.1                   | 915    | 105526 | 6.8 | LRAP protein                                                                                                                                                                                                                                                                                                                                                                                                                                                                                                                                                                                                                                                                                              |
| 1485 | Q9HBX2           | 6                    | 8              | 7.7                   | 960    | 110462 | 6.7 | Aminopeptidase                                                                                                                                                                                                                                                                                                                                                                                                                                                                                                                                                                                                                                                                                            |
| 1485 | Q7Z5K1           | 6                    | 8              | 7.7                   | 960    | 110447 | 6.7 | Leukocyte-derived arginine aminopeptidase long form variant                                                                                                                                                                                                                                                                                                                                                                                                                                                                                                                                                                                                                                               |
| 1486 | P12109           | 6                    | 8              | 8                     | 1028   | 108529 | 5.4 | Collagen alpha-1(VI) chain precursor                                                                                                                                                                                                                                                                                                                                                                                                                                                                                                                                                                                                                                                                      |
| 1487 | Q8WTT2           | 6                    | 10             | 7.9                   | 800    | 92548  | 9.2 | Nucleolar complex protein 3 homolog                                                                                                                                                                                                                                                                                                                                                                                                                                                                                                                                                                                                                                                                       |
| 1487 | UPI0000D60F9F    | 6                    | 10             | 7.9                   | 800    | 92624  | 9.2 | Nucleolar complex protein 3 homolog (NOC3 protein homolog) (NOC3-like protein) (Nucleolar complex-associated protein 3-like protein) (Factor for adipocyte differentiation 24).                                                                                                                                                                                                                                                                                                                                                                                                                                                                                                                           |
| 1488 | Q43592           | 6                    | 12             | 7.8                   | 962    | 109964 | 5.4 | Exportin-T (tRNA exportin) (Exportin(tRNA))                                                                                                                                                                                                                                                                                                                                                                                                                                                                                                                                                                                                                                                               |
| 1489 | UPI0000456E7C    | 6                    | 12             | 8.9                   | 827    | 95332  | 7.5 | Pre-mRNA-processing factor 40 homolog A (Formin-binding protein 3) (Formin-binding protein 11) (Huntingtin-interacting protein HYPA) (Huntingtin yeast partner A) (Fas ligand-associated factor 1) (NY-REN- 6 antigen).                                                                                                                                                                                                                                                                                                                                                                                                                                                                                   |
| 1489 | O75400-2         | 6                    | 12             | 8.1                   | 915    | 104363 | 7.6 | Isoform 2 of O75400                                                                                                                                                                                                                                                                                                                                                                                                                                                                                                                                                                                                                                                                                       |
| 1489 | O75400-3         | 6                    | 12             | 7.9                   | 939    | 106907 | 7.4 | Isoform 3 of O75400                                                                                                                                                                                                                                                                                                                                                                                                                                                                                                                                                                                                                                                                                       |
| 1489 | O75400           | 6                    | 12             | 7.7                   | 957    | 108805 | 7.6 | Pre-mRNA-processing factor 40 homolog A                                                                                                                                                                                                                                                                                                                                                                                                                                                                                                                                                                                                                                                                   |
| 1489 | UPI0000DD7A6A    | 6                    | 12             | 7.6                   | 974    | 110497 | 8.2 | PREDICTED: similar to Pre-mRNA-processing factor 40 homolog A (Formin-binding protein 3) (Huntingtin yeast partner A) (Huntingtin-interacting protein HYPA/FBP11) (Fas ligand-associated factor 1) (NY-REN-6 antigen) isoform 1                                                                                                                                                                                                                                                                                                                                                                                                                                                                           |
| 1490 | Q5H9R7-3         | 6                    | 15             | 8.5                   | 791    | 88909  | 4.6 | Isoform 3 of Q5H9R7                                                                                                                                                                                                                                                                                                                                                                                                                                                                                                                                                                                                                                                                                       |
| 1490 | Q5H9R7-6         | 6                    | 15             | 7.9                   | 844    | 94445  | 4.6 | Isoform 6 of Q5H9R7                                                                                                                                                                                                                                                                                                                                                                                                                                                                                                                                                                                                                                                                                       |
| 1490 | Q5H9R7           | 6                    | 15             | 7.7                   | 873    | 97669  | 4.6 | SAPS domain family member 3                                                                                                                                                                                                                                                                                                                                                                                                                                                                                                                                                                                                                                                                               |
| 1490 | Q5H9R7-2         | 6                    | 15             | 7.7                   | 867    | 96957  | 4.6 | Isoform 2 of Q5H9R7                                                                                                                                                                                                                                                                                                                                                                                                                                                                                                                                                                                                                                                                                       |
| 1490 | Q5H9R7-5         | 6                    | 15             | 7.6                   | 879    | 98485  | 4.6 | Isoform 5 of Q5H9R7                                                                                                                                                                                                                                                                                                                                                                                                                                                                                                                                                                                                                                                                                       |
| 1491 | Q96KR1           | 6                    | 7              | 7.5                   | 1057   | 115287 | 9.3 | Zinc finger RNA-binding protein                                                                                                                                                                                                                                                                                                                                                                                                                                                                                                                                                                                                                                                                           |
| 1491 | UPI0000D6160F    | 6                    | 7              | 7.5                   | 1055   | 115092 | 9.2 | zinc finger RNA binding protein                                                                                                                                                                                                                                                                                                                                                                                                                                                                                                                                                                                                                                                                           |
| 1491 | UPI0000D6160E    | 6                    | 7              | 7.4                   | 1074   | 117078 | 9   | zinc finger RNA binding protein                                                                                                                                                                                                                                                                                                                                                                                                                                                                                                                                                                                                                                                                           |
| 1491 | UPI00001BBB38    | 6                    | 7              | 7.4                   | 1074   | 117012 | 9   | zinc finger RNA binding protein                                                                                                                                                                                                                                                                                                                                                                                                                                                                                                                                                                                                                                                                           |
| 1492 | Q8N3Z2           | 6                    | 20             | 7.4                   | 976    | 108266 | 6.2 | Ephrin receptor                                                                                                                                                                                                                                                                                                                                                                                                                                                                                                                                                                                                                                                                                           |
| 1493 | UPI0000D6167D    | 6                    | 7              | 8.3                   | 835    | 91015  | 4.7 | Bromodomain-containing protein 8 (p120) (Skeletal muscle abundant protein) (Thyroid hormone receptor coactivating protein 120kDa) (TrCP120).                                                                                                                                                                                                                                                                                                                                                                                                                                                                                                                                                              |
| 1493 | Q9H0E9-4         | 6                    | 7              | 8                     | 866    | 94297  | 4.7 | Isoform 4 of Q9H0E9                                                                                                                                                                                                                                                                                                                                                                                                                                                                                                                                                                                                                                                                                       |

| No.  | Accession Number | Unique Peptide Count | Spectrum Count | Sequence Coverage (%) | Length | MolWt  | pI  | Descriptive Name                                                                                                                                                               |
|------|------------------|----------------------|----------------|-----------------------|--------|--------|-----|--------------------------------------------------------------------------------------------------------------------------------------------------------------------------------|
| 1493 | Q9H0E9-2         | 6                    | 7              | 7.3                   | 951    | 102839 | 4.7 | Isoform 2 of Q9H0E9                                                                                                                                                            |
| 1494 | Q92797           | 6                    | 9              | 6.9                   | 1274   | 141148 | 6.1 | Symplekin                                                                                                                                                                      |
| 1495 | P14735           | 6                    | 8              | 6.8                   | 1019   | 118022 | 6.8 | Insulin-degrading enzyme                                                                                                                                                       |
| 1495 | Q5T5N2           | 6                    | 8              | 6.8                   | 1019   | 117968 | 6.6 | Insulin-degrading enzyme                                                                                                                                                       |
| 1496 | Q59GN8           | 6                    | 12             | 7.2                   | 975    | 110234 | 6.2 | PTK2 protein tyrosine kinase 2 isoform b variant                                                                                                                               |
| 1496 | Q8IYN9           | 6                    | 12             | 7                     | 1006   | 114253 | 6.8 | PTK2 protein                                                                                                                                                                   |
| 1496 | Q59GM6           | 6                    | 12             | 7                     | 1007   | 114157 | 6.6 | PTK2 protein tyrosine kinase 2 isoform b variant                                                                                                                               |
| 1496 | Q05397           | 6                    | 12             | 6.7                   | 1052   | 119233 | 6.6 | Focal adhesion kinase 1                                                                                                                                                        |
| 1497 | Q6NX72           | 6                    | 18             | 6.6                   | 1160   | 132322 | 5.8 | EHBP1 protein                                                                                                                                                                  |
| 1497 | Q6QNV2           | 6                    | 18             | 6.4                   | 1196   | 136237 | 5.4 | EH domain binding protein 1                                                                                                                                                    |
| 1497 | UPI000013D49A    | 6                    | 18             | 6.2                   | 1231   | 140017 | 5.3 | EH domain binding protein 1                                                                                                                                                    |
| 1497 | Q8NDI1           | 6                    | 18             | 6.2                   | 1231   | 139858 | 5.4 | EH domain-binding protein 1                                                                                                                                                    |
| 1498 | Q8N3E0           | 6                    | 12             | 6.6                   | 1009   | 114456 | 7.8 | Hypothetical protein DKFZp761P0824                                                                                                                                             |
| 1498 | UPI0000441EF9    | 6                    | 12             | 6.1                   | 1092   | 124106 | 7.7 | formin-like 2                                                                                                                                                                  |
| 1498 | Q96PY5           | 6                    | 12             | 6                     | 1112   | 126314 | 8.2 | Formin-like protein 2                                                                                                                                                          |
| 1499 | Q6Y7W6-2         | 6                    | 12             | 7.5                   | 1100   | 127290 | 5.4 | Isoform 2 of Q6Y7W6                                                                                                                                                            |
| 1499 | Q6Y7W6           | 6                    | 12             | 6.4                   | 1299   | 150070 | 5.5 | PERQ amino acid-rich with GYF domain-containing protein 2                                                                                                                      |
| 1499 | UPI0000D612CD    | 6                    | 12             | 6.4                   | 1301   | 150271 | 5.5 | PERQ amino acid-rich with GYF domain-containing protein 2 (Grb10- interacting GYF protein 2) (Trinucleotide repeat-containing protein 15).                                     |
| 1500 | Q43290           | 6                    | 12             | 6.1                   | 800    | 90255  | 6.1 | U4/U6.U5 tri-snRNP-associated protein 1                                                                                                                                        |
| 1500 | UPI0000D62637    | 6                    | 12             | 6.1                   | 800    | 90310  | 6.2 | U4/U6.U5 tri-snRNP-associated protein 1 (U4/U6.U5 tri-snRNP-associated 110 kDa protein) (Squamous cell carcinoma antigen recognized by T cells 1) (SART-1) (hSART-1) (hSnu66). |
| 1501 | Q13464           | 6                    | 13             | 6.1                   | 1354   | 158174 | 5.9 | Rho-associated protein kinase 1                                                                                                                                                |
| 1501 | UPI000022A6D8    | 6                    | 13             | 6.1                   | 1354   | 158243 | 5.9 | Rho-associated protein kinase 1 (EC 2.7.11.1) (Rho-associated, coiled-coil-containing protein kinase 1) (p160 ROCK-1) (p160ROCK) (Renal carcinoma antigen NY-REN-35).          |
| 1501 | Q2KHM4           | 6                    | 13             | 6.1                   | 1354   | 158127 | 5.9 | Rho-associated, coiled-coil containing protein kinase 1                                                                                                                        |
| 1502 | Q5JTH9           | 6                    | 17             | 5.2                   | 1297   | 143702 | 8.8 | RRP12-like protein                                                                                                                                                             |
| 1502 | UPI00000712A5    | 6                    | 17             | 5.2                   | 1297   | 143732 | 8.8 | ribosomal RNA processing 12 homolog                                                                                                                                            |
| 1503 | Q2T9J4           | 6                    | 13             | 5.1                   | 1132   | 128394 | 7   | Inositol polyphosphate-5-phosphatase F                                                                                                                                         |
| 1503 | Q9Y2H2           | 6                    | 13             | 5                     | 1150   | 130166 | 7.1 | Inositol polyphosphate-5-phosphatase F                                                                                                                                         |
| 1504 | O60524           | 6                    | 10             | 5                     | 1076   | 122970 | 6.3 | Serologically defined colon cancer antigen 1                                                                                                                                   |
| 1504 | UPI0000246D16    | 6                    | 10             | 5                     | 1076   | 122954 | 6.3 | Serologically defined colon cancer antigen 1 (Antigen NY-CO-1).                                                                                                                |
| 1505 | Q7KZ85           | 6                    | 8              | 4.1                   | 1726   | 199071 | 4.9 | Transcription elongation factor SPT6                                                                                                                                           |
| 1505 | UPI0000D622EF    | 6                    | 8              | 4.1                   | 1728   | 199271 | 4.9 | Transcription elongation factor SPT6 (hSPT6) (Tat-cotransactivator 2 protein) (Tat-CT2 protein).                                                                               |
| 1506 | Q5VYK3           | 6                    | 25             | 4                     | 1845   | 204289 | 7.1 | Proteasome-associated protein ECM29 homolog                                                                                                                                    |
| 1506 | UPI0000D618EB    | 6                    | 25             | 4                     | 1833   | 203186 | 7.2 | Proteasome-associated protein ECM29 homolog (Ecm29).                                                                                                                           |
| 1506 | UPI00001D76EA    | 6                    | 25             | 4                     | 1839   | 203992 | 7.2 | Proteasome-associated protein ECM29 homolog (Ecm29).                                                                                                                           |
| 1506 | UPI0000DD7F7A    | 6                    | 25             | 3.7                   | 2017   | 223692 | 8.7 | PREDICTED: similar to Proteasome-associated protein ECM29 homolog (Ecm29)                                                                                                      |
| 1507 | Q6MZL5           | 6                    | 7              | 3.8                   | 1694   | 195643 | 5.2 | Hypothetical protein DKFZp686C06243                                                                                                                                            |
| 1507 | Q15643           | 6                    | 7              | 3.2                   | 1979   | 227637 | 5.3 | Thyroid receptor-interacting protein 11                                                                                                                                        |
| 1507 | UPI000013D767    | 6                    | 7              | 3.2                   | 1979   | 227584 | 5.3 | Thyroid receptor-interacting protein 11 (TRIP-11) (Golgi-associated microtubule-binding protein 210) (GMAP-210) (Trip230) (Clonal evolution-related gene on chromosome 14).    |
| 1508 | Q75691           | 6                    | 26             | 2.4                   | 2785   | 318426 | 7.4 | Small subunit processome component 20 homolog                                                                                                                                  |
| 1508 | UPI00001FB38B    | 6                    | 26             | 2.4                   | 2785   | 318385 | 7.4 | down-regulated in metastasis                                                                                                                                                   |
| 1508 | UPI0000031EE4    | 6                    | 26             | 2.4                   | 2785   | 318400 | 7.4 | PREDICTED: similar to Small subunit processome component 20 homolog (Down-regulated in metastasis protein) (Protein Key-1A6) (Novel nucleolar protein 73) (NNP73)              |
| 1509 | P46939           | 6                    | 12             | 2.2                   | 3433   | 394495 | 5.3 | Utrophin                                                                                                                                                                       |
| 1509 | UPI000049E05A    | 6                    | 12             | 2.2                   | 3433   | 394520 | 5.3 | Utrophin (Dystrophin-related protein 1) (DRP1) (DRP).                                                                                                                          |
| 1509 | Q5SZ57           | 6                    | 12             | 2.2                   | 3433   | 394467 | 5.3 | Utrophin                                                                                                                                                                       |
| 1510 | Q5VVM7           | 6                    | 8              | 2.3                   | 3114   | 357527 | 5.1 | Centromere protein F, 350/400ka                                                                                                                                                |
| 1510 | P49454           | 6                    | 8              | 2.2                   | 3210   | 367595 | 5.1 | Centromere protein F                                                                                                                                                           |
| 1511 | UPI000023BD43    | 6                    | 11             | 1.8                   | 3585   | 403087 | 6.4 | vacuolar protein sorting 13C protein isoform 1B                                                                                                                                |
| 1511 | Q709C8-4         | 6                    | 11             | 1.8                   | 3584   | 402957 | 6.4 | Isoform 4 of Q709C8                                                                                                                                                            |
| 1511 | Q709C8-3         | 6                    | 11             | 1.8                   | 3710   | 417279 | 6.6 | Isoform 3 of Q709C8                                                                                                                                                            |
| 1511 | Q709C8-2         | 6                    | 11             | 1.8                   | 3627   | 408072 | 6.6 | Isoform 2 of Q709C8                                                                                                                                                            |
| 1511 | Q709C8           | 6                    | 11             | 1.7                   | 3753   | 422393 | 6.8 | Vacuolar protein sorting-associated protein 13C                                                                                                                                |
| 1512 | Q8IWP6           | 5                    | 53             | 72.4                  | 445    | 49753  | 4.9 | Class IVb beta tubulin                                                                                                                                                         |
| 1513 | Q9Y333           | 5                    | 20             | 67.4                  | 95     | 10835  | 6.5 | U6 snRNA-associated Sm-like protein LSm2                                                                                                                                       |
| 1514 | Q6IB68           | 5                    | 14             | 65                    | 103    | 11953  | 5.9 | MYCBP protein                                                                                                                                                                  |
| 1514 | Q99417           | 5                    | 14             | 65                    | 103    | 11967  | 5.9 | C-Myc-binding protein                                                                                                                                                          |
| 1515 | P18085           | 5                    | 50             | 59.4                  | 180    | 20511  | 7.2 | ADP-ribosylation factor 4                                                                                                                                                      |
| 1516 | Q96EL3           | 5                    | 11             | 58.9                  | 112    | 12107  | 8.8 | 39S ribosomal protein L53, mitochondrial precursor                                                                                                                             |



| No.  | Accession Number | Unique Peptide Count | Spectrum Count | Sequence Coverage (%) | Length | MolWt | pI   | Descriptive Name                                                               |
|------|------------------|----------------------|----------------|-----------------------|--------|-------|------|--------------------------------------------------------------------------------|
| 1517 | Q15369           | 5                    | 23             | 58                    | 112    | 12473 | 4.8  | Transcription elongation factor B polypeptide 1                                |
| 1518 | Q8WUW1           | 5                    | 22             | 54.7                  | 75     | 8745  | 5.5  | Probable protein BRICK1                                                        |
| 1518 | Q8WUW1-2         | 5                    | 22             | 38.7                  | 106    | 12046 | 6.8  | Isoform 2 of Q8WUW1                                                            |
| 1518 | UPI00004570B9    | 5                    | 22             | 38                    | 108    | 12158 | 6.8  | UPI00004570B9 UniRef100 entry                                                  |
| 1519 | P31946-2         | 5                    | 51             | 54.5                  | 244    | 27850 | 4.8  | Isoform Short of P31946                                                        |
| 1519 | P31946           | 5                    | 51             | 54.1                  | 246    | 28082 | 4.8  | 14-3-3 protein beta/alpha                                                      |
| 1520 | O43678           | 5                    | 9              | 49.5                  | 99     | 10922 | 9.6  | NADH dehydrogenase [ubiquinone] 1 alpha subcomplex subunit 2                   |
| 1521 | Q64152           | 5                    | 18             | 50                    | 204    | 22031 | 9.5  | Transcription factor BTF3                                                      |
| 1521 | P20290           | 5                    | 18             | 49.5                  | 206    | 22168 | 9.4  | Transcription factor BTF3                                                      |
| 1522 | O60925           | 5                    | 14             | 49.2                  | 122    | 14210 | 6.8  | Prefoldin subunit 1                                                            |
| 1523 | P58546           | 5                    | 83             | 49.2                  | 118    | 12895 | 5.5  | Myotrophin                                                                     |
| 1524 | Q13526           | 5                    | 11             | 47.2                  | 163    | 18243 | 8.8  | Peptidyl-prolyl cis-trans isomerase NIMA-interacting 1                         |
| 1525 | Q8WVC2           | 5                    | 45             | 46.9                  | 81     | 8850  | 8.5  | RPS21 protein                                                                  |
| 1525 | P63220           | 5                    | 45             | 45.8                  | 83     | 9111  | 8.5  | 40S ribosomal protein S21                                                      |
| 1526 | P68133           | 5                    | 92             | 45.6                  | 377    | 42051 | 5.4  | Actin, alpha skeletal muscle                                                   |
| 1527 | Q8TDP1-2         | 5                    | 11             | 45.4                  | 163    | 17712 | 4.9  | Isoform 2 of Q8TDP1                                                            |
| 1527 | Q8TDP1           | 5                    | 11             | 45.1                  | 164    | 17840 | 5    | Ribonuclease H2 subunit C                                                      |
| 1528 | Q16718           | 5                    | 25             | 44                    | 116    | 13459 | 6    | NADH dehydrogenase [ubiquinone] 1 alpha subcomplex subunit 5                   |
| 1529 | Q9H910           | 5                    | 6              | 43.7                  | 190    | 20063 | 9.3  | Hematological and neurological expressed 1-like protein                        |
| 1530 | P68036           | 5                    | 15             | 43.5                  | 154    | 17862 | 8.5  | Ubiquitin-conjugating enzyme E2 L3                                             |
| 1531 | Q9UHA4           | 5                    | 10             | 43.5                  | 124    | 13623 | 7.4  | Mitogen-activated protein kinase kinase 1-interacting protein 1                |
| 1532 | P62879           | 5                    | 14             | 43.2                  | 340    | 37331 | 6    | Guanine nucleotide-binding protein G(I)/G(S)/G(T) subunit beta 2               |
| 1533 | P49458           | 5                    | 17             | 43                    | 86     | 10112 | 8    | Signal recognition particle 9 kDa protein                                      |
| 1534 | Q7RTV0           | 5                    | 9              | 41.8                  | 110    | 12405 | 8.4  | PHD finger-like domain-containing protein 5A                                   |
| 1535 | Q99584           | 5                    | 32             | 41.8                  | 98     | 11471 | 6.2  | Protein S100-A13                                                               |
| 1536 | Q9BRJ6           | 5                    | 12             | 41.8                  | 194    | 22083 | 9.6  | MGC11257 protein                                                               |
| 1537 | P12236           | 5                    | 97             | 41.6                  | 298    | 32866 | 9.7  | ADP/ATP translocase 3                                                          |
| 1537 | UPI000015FDB7    | 5                    | 97             | 41.6                  | 298    | 32926 | 9.7  | solute carrier family 25, member A6                                            |
| 1538 | Q9BZL1           | 5                    | 17             | 41.1                  | 73     | 8547  | 8.4  | Ubiquitin-like protein 5                                                       |
| 1539 | Q8NB37           | 5                    | 7              | 40.5                  | 220    | 23298 | 6.6  | CDNA FLJ34283 fis, clone FEBRA2003926, weakly similar to NonF                  |
| 1540 | P84090           | 5                    | 54             | 40.4                  | 104    | 12259 | 5.9  | Enhancer of rudimentary homolog                                                |
| 1541 | Q4VC31           | 5                    | 12             | 40.3                  | 144    | 16620 | 7.8  | Coiled-coil domain-containing protein 58                                       |
| 1542 | O75380           | 5                    | 7              | 38.7                  | 124    | 13712 | 8.3  | NADH dehydrogenase [ubiquinone] iron-sulfur protein 6, mitochondrial precursor |
| 1543 | Q8IXM3           | 5                    | 22             | 38.7                  | 137    | 15383 | 9.6  | 39S ribosomal protein L41, mitochondrial precursor                             |
| 1544 | P52907           | 5                    | 18             | 38.5                  | 286    | 32923 | 5.7  | F-actin capping protein subunit alpha-1                                        |
| 1545 | Q15121           | 5                    | 37             | 38.5                  | 130    | 15040 | 5    | Astrocytic phosphoprotein PEA-15                                               |
| 1545 | Q6FHL9           | 5                    | 37             | 38.5                  | 130    | 15068 | 5    | PEA15 protein                                                                  |
| 1546 | O95881           | 5                    | 14             | 38.4                  | 172    | 19206 | 5.4  | Thioredoxin domain-containing protein 12 precursor                             |
| 1547 | P07741           | 5                    | 16             | 38.3                  | 180    | 19608 | 6    | Adenine phosphoribosyltransferase                                              |
| 1548 | Q8CFN2           | 5                    | 42             | 38.2                  | 191    | 21259 | 6.5  | Cell division control protein 42 homolog precursor                             |
| 1548 | UPI0000EFE353    | 5                    | 42             | 38                    | 192    | 21346 | 6.5  | Human Cell Division Cycle 42 (CDC42)                                           |
| 1549 | Q9Y2Q5           | 5                    | 12             | 45.6                  | 125    | 13507 | 5.4  | Mitogen-activated protein-binding protein-interacting protein                  |
| 1549 | Q5VY97           | 5                    | 12             | 38                    | 150    | 15609 | 7.8  | Mitogen-activated protein-binding protein-interacting protein                  |
| 1550 | P51153           | 5                    | 25             | 37.4                  | 203    | 22774 | 9.2  | Ras-related protein Rab-13                                                     |
| 1551 | P60983           | 5                    | 12             | 37.3                  | 142    | 16713 | 5.3  | Glia maturation factor beta                                                    |
| 1551 | UPI0000D6240C    | 5                    | 12             | 34.4                  | 154    | 18218 | 5.5  | Glia maturation factor beta (GMF-beta).                                        |
| 1551 | Q9BS35           | 5                    | 12             | 34.4                  | 154    | 18110 | 5.3  | GMFB protein                                                                   |
| 1552 | O00148           | 5                    | 18             | 36.8                  | 427    | 49130 | 5.7  | ATP-dependent RNA helicase DDX39                                               |
| 1553 | P30046           | 5                    | 25             | 36.4                  | 118    | 12712 | 7.3  | D-dopachrome decarboxylase                                                     |
| 1554 | P51571           | 5                    | 55             | 36.4                  | 173    | 18999 | 6.2  | Translocon-associated protein subunit delta precursor                          |
| 1555 | P62263           | 5                    | 86             | 36.4                  | 151    | 16273 | 10.1 | 40S ribosomal protein S14                                                      |
| 1556 | O14602           | 5                    | 31             | 36.1                  | 144    | 16442 | 5.2  | Eukaryotic translation initiation factor 1A, Y-chromosomal                     |
| 1557 | P84095           | 5                    | 6              | 36.1                  | 191    | 21308 | 8.1  | Rho-related GTP-binding protein RhoG precursor                                 |
| 1558 | P61353           | 5                    | 37             | 36                    | 136    | 15798 | 10.6 | 60S ribosomal protein L27                                                      |
| 1559 | P55769           | 5                    | 22             | 35.9                  | 128    | 14174 | 8.5  | NHP2-like protein 1                                                            |
| 1559 | UPI0000F53459    | 5                    | 22             | 35.4                  | 130    | 14318 | 8.5  | U4/U6.U5 tri-snRNP 15.5 kDa protein                                            |
| 1560 | P57105           | 5                    | 19             | 35.9                  | 145    | 15928 | 6.3  | Synaptotagmin-2-binding protein                                                |
| 1561 | Q8IV95           | 5                    | 15             | 41                    | 156    | 17984 | 5.1  | Nudix (Nucleoside diphosphate linked moiety X)-type motif 1                    |
| 1561 | Q7Z7N6           | 5                    | 15             | 41                    | 156    | 17951 | 5.1  | Nudix (Nucleoside diphosphate linked moiety X)-type motif 1                    |
| 1561 | A4D205           | 5                    | 15             | 35.8                  | 179    | 20296 | 5    | Nudix (Nucleoside diphosphate linked moiety X)-type motif 1                    |
| 1561 | P36639           | 5                    | 15             | 32.5                  | 197    | 22552 | 5.3  | 7,8-dihydro-8-oxoguanine triphosphatase                                        |
| 1562 | Q16527           | 5                    | 14             | 35.8                  | 193    | 20954 | 8.6  | Cysteine and glycine-rich protein 2                                            |
| 1563 | P63173           | 5                    | 53             | 35.7                  | 70     | 8218  | 10.1 | 60S ribosomal protein L38                                                      |
| 1564 | Q9NV31           | 5                    | 13             | 35.3                  | 184    | 21850 | 9.5  | U3 small nucleolar ribonucleoprotein protein IMP3                              |

| No.  | Accession Number | Unique Peptide Count | Spectrum Count | Sequence Coverage (%) | Length | MolWt | pI   | Descriptive Name                                                                                                                                                                                                             |
|------|------------------|----------------------|----------------|-----------------------|--------|-------|------|------------------------------------------------------------------------------------------------------------------------------------------------------------------------------------------------------------------------------|
| 1565 | Q6P1X6           | 5                    | 12             | 34.7                  | 216    | 23875 | 9.1  | Similar to RIKEN cDNA C030006K11 gene                                                                                                                                                                                        |
| 1565 | Q6P2Q7           | 5                    | 12             | 34.7                  | 216    | 23889 | 9.1  | Similar to RIKEN cDNA C030006K11 gene                                                                                                                                                                                        |
| 1566 | Q9BRJ7           | 5                    | 9              | 34.6                  | 211    | 23338 | 8.9  | Protein syndesmos                                                                                                                                                                                                            |
| 1567 | A2A2V9           | 5                    | 8              | 34.5                  | 113    | 13188 | 5.1  | Novel protein                                                                                                                                                                                                                |
| 1567 | UPI00000373C5    | 5                    | 8              | 34.5                  | 113    | 13171 | 5.1  | family with sequence similarity 127, member A                                                                                                                                                                                |
| 1567 | Q9BWD3           | 5                    | 8              | 34.5                  | 113    | 13204 | 5.1  | Family with sequence similarity 127, member B                                                                                                                                                                                |
| 1568 | P40616           | 5                    | 18             | 34.3                  | 181    | 20418 | 5.7  | ADP-ribosylation factor-like protein 1                                                                                                                                                                                       |
| 1569 | Q96EK6           | 5                    | 5              | 34.2                  | 184    | 20749 | 8    | Glucosamine 6-phosphate N-acetyltransferase                                                                                                                                                                                  |
| 1570 | P55957           | 5                    | 12             | 33.3                  | 195    | 21995 | 5.4  | BH3-interacting domain death agonist (BID) (p22 BID) [Contains: BH3- interacting domain death agonist p15 (p15 BID); BH3-interacting domain death agonist p13 (p13 BID); BH3-interacting domain death agonist p11 (p11 BID)] |
| 1571 | Q9UMS0           | 5                    | 13             | 33.2                  | 196    | 21802 | 4.3  | NFU1 iron-sulfur cluster scaffold homolog                                                                                                                                                                                    |
| 1572 | UPI000013EB83    | 5                    | 11             | 33.2                  | 376    | 42003 | 5.6  | hypothetical protein LOC345651                                                                                                                                                                                               |
| 1573 | P60866           | 5                    | 39             | 32.8                  | 119    | 13373 | 9.9  | 40S ribosomal protein S20                                                                                                                                                                                                    |
| 1574 | Q5W111           | 5                    | 7              | 32.7                  | 196    | 21666 | 6.7  | Chronic lymphocytic leukemia deletion region gene 6 protein                                                                                                                                                                  |
| 1575 | P10606           | 5                    | 22             | 32.6                  | 129    | 13696 | 8.8  | Cytochrome c oxidase subunit 5B, mitochondrial precursor                                                                                                                                                                     |
| 1575 | Q6FHM4           | 5                    | 22             | 32.6                  | 129    | 13705 | 8.8  | COX5B protein                                                                                                                                                                                                                |
| 1576 | Q13765           | 5                    | 37             | 32.6                  | 215    | 23384 | 4.6  | Nascent polypeptide-associated complex subunit alpha                                                                                                                                                                         |
| 1577 | P26885           | 5                    | 9              | 32.4                  | 142    | 15649 | 9.1  | FK506-binding protein 2 precursor                                                                                                                                                                                            |
| 1578 | Q9UBQ0           | 5                    | 11             | 32.4                  | 182    | 20506 | 6.8  | Vacuolar protein sorting-associated protein 29                                                                                                                                                                               |
| 1579 | P63279           | 5                    | 11             | 32.3                  | 158    | 18007 | 8.7  | SUMO-conjugating enzyme UBC9                                                                                                                                                                                                 |
| 1579 | UPI00001AF46D    | 5                    | 11             | 27.7                  | 184    | 20458 | 8.5  | SUMO-conjugating enzyme UBC9 (EC 6.3.2.-) (SUMO-protein ligase) (Ubiquitin-conjugating enzyme E2 I) (Ubiquitin-protein ligase I) (Ubiquitin carrier protein I) (Ubiquitin carrier protein 9) (p18).                          |
| 1579 | Q7KZS0           | 5                    | 11             | 27.7                  | 184    | 20444 | 8.5  | Ubiquitin-conjugating enzyme E2I                                                                                                                                                                                             |
| 1580 | P02794           | 5                    | 31             | 32.2                  | 183    | 21226 | 5.6  | Ferritin heavy chain                                                                                                                                                                                                         |
| 1580 | UPI0000EB65CC    | 5                    | 31             | 32.2                  | 183    | 21198 | 5.4  | FERRITIN HEAVY CHAIN                                                                                                                                                                                                         |
| 1580 | UPI0000EB65CB    | 5                    | 31             | 32.2                  | 183    | 21212 | 5.4  | FERRITIN HEAVY CHAIN                                                                                                                                                                                                         |
| 1580 | UPI0000EB65CA    | 5                    | 31             | 32.2                  | 183    | 21212 | 5.4  | FERRITIN HEAVY CHAIN                                                                                                                                                                                                         |
| 1580 | Q6NZ44           | 5                    | 31             | 32.2                  | 183    | 21242 | 5.3  | FTH1 protein                                                                                                                                                                                                                 |
| 1580 | UPI0000D62618    | 5                    | 31             | 24.2                  | 244    | 27725 | 7    | Ferritin heavy chain (EC 1.16.3.1) (Ferritin H subunit) (Proliferation-inducing gene 15 protein).                                                                                                                            |
| 1581 | O00746           | 5                    | 10             | 32.1                  | 187    | 20659 | 10.3 | Nucleoside diphosphate kinase, mitochondrial precursor                                                                                                                                                                       |
| 1581 | Q4TT34           | 5                    | 10             | 30.8                  | 195    | 21522 | 10.6 | Non-metastatic cells 4, protein expressed in                                                                                                                                                                                 |
| 1582 | P30042           | 5                    | 10             | 32.1                  | 268    | 28170 | 8.3  | ES1 protein homolog, mitochondrial precursor                                                                                                                                                                                 |
| 1583 | Q8TED1           | 5                    | 15             | 31.6                  | 209    | 23909 | 9.4  | CDNA FLJ23636 fis, clone CAS07176                                                                                                                                                                                            |
| 1583 | UPI000013E37B    | 5                    | 15             | 31.6                  | 209    | 23881 | 9.4  | similar to RIKEN cDNA 2310016C16 (LOC493869), mRNA                                                                                                                                                                           |
| 1584 | Q9UF68           | 5                    | 5              | 31.9                  | 270    | 30658 | 7    | Hypothetical protein DKFZp434A149                                                                                                                                                                                            |
| 1584 | Q6BCY4           | 5                    | 5              | 31.2                  | 276    | 31458 | 8.5  | Cytochrome b5 reductase 2                                                                                                                                                                                                    |
| 1585 | Q5JQ44           | 5                    | 9              | 31.5                  | 181    | 20294 | 4.8  | Hypothetical protein DKFZp547A0616                                                                                                                                                                                           |
| 1585 | P61225           | 5                    | 9              | 31.1                  | 183    | 20504 | 4.8  | Ras-related protein Rap-2b precursor                                                                                                                                                                                         |
| 1586 | UPI000046D37E    | 5                    | 13             | 31.5                  | 292    | 31762 | 7.5  | syntenin isoform 2                                                                                                                                                                                                           |
| 1586 | O00560           | 5                    | 13             | 30.9                  | 298    | 32444 | 7.5  | Syntenin-1                                                                                                                                                                                                                   |
| 1587 | Q53S90           | 5                    | 16             | 30.9                  | 363    | 39555 | 8.6  | Hypothetical protein STK39                                                                                                                                                                                                   |
| 1587 | UPI000013D46D    | 5                    | 16             | 20.6                  | 545    | 59474 | 6.3  | serine threonine kinase 39 (STE20/SPS1 homolog, yeast)                                                                                                                                                                       |
| 1587 | Q9UEW8           | 5                    | 16             | 20.5                  | 547    | 59642 | 6.3  | STE20/SPS1-related proline-alanine-rich protein kinase                                                                                                                                                                       |
| 1588 | Q15363           | 5                    | 66             | 30.8                  | 201    | 22761 | 5.2  | Transmembrane emp24 domain-containing protein 2 precursor                                                                                                                                                                    |
| 1589 | P46778           | 5                    | 46             | 30.6                  | 160    | 18565 | 10.5 | 60S ribosomal protein L21                                                                                                                                                                                                    |
| 1589 | UPI000006FC44    | 5                    | 46             | 30.6                  | 160    | 18595 | 10.5 | PREDICTED: similar to 60S ribosomal protein L21                                                                                                                                                                              |
| 1589 | Q59GK9           | 5                    | 46             | 30.1                  | 163    | 18891 | 10.5 | Ribosomal protein L21 variant                                                                                                                                                                                                |
| 1590 | O00264           | 5                    | 14             | 30.3                  | 195    | 21671 | 4.7  | Membrane-associated progesterone receptor component 1                                                                                                                                                                        |
| 1591 | Q3T0Q6           | 5                    | 17             | 31.8                  | 170    | 18742 | 7.7  | Cellular nucleic acid-binding protein                                                                                                                                                                                        |
| 1591 | Q4JGY1           | 5                    | 17             | 31.6                  | 171    | 18871 | 7.6  | Cellular nucleic acid binding protein beta variant 1                                                                                                                                                                         |
| 1591 | Q4JGY0           | 5                    | 17             | 31.4                  | 172    | 18970 | 7.6  | Cellular nucleic acid binding protein beta variant 2                                                                                                                                                                         |
| 1591 | P62633           | 5                    | 17             | 30.5                  | 177    | 19463 | 7.7  | Cellular nucleic acid-binding protein                                                                                                                                                                                        |
| 1591 | P53996           | 5                    | 17             | 30.3                  | 178    | 19592 | 7.6  | Cellular nucleic acid-binding protein                                                                                                                                                                                        |
| 1592 | Q6P587           | 5                    | 12             | 33.5                  | 224    | 24843 | 7.4  | Fumarylacetoacetate hydrolase domain-containing protein 1                                                                                                                                                                    |
| 1592 | A2A2C3           | 5                    | 12             | 33.2                  | 226    | 24910 | 7.7  | Fumarylacetoacetate hydrolase domain containing 1                                                                                                                                                                            |
| 1592 | A2A2C2           | 5                    | 12             | 30.2                  | 248    | 27128 | 7.7  | Fumarylacetoacetate hydrolase domain containing 1                                                                                                                                                                            |
| 1593 | O15145           | 5                    | 31             | 29.8                  | 178    | 20547 | 8.6  | Actin-related protein 2/3 complex subunit 3                                                                                                                                                                                  |
| 1593 | Q2LE71           | 5                    | 31             | 29.8                  | 178    | 20565 | 8.6  | Actin related protein 2/3 complex                                                                                                                                                                                            |
| 1594 | Q02750           | 5                    | 6              | 29.5                  | 393    | 43439 | 6.6  | Dual specificity mitogen-activated protein kinase kinase 1                                                                                                                                                                   |
| 1595 | P62070           | 5                    | 16             | 28.9                  | 204    | 23400 | 6    | Ras-related protein R-Ras2 precursor                                                                                                                                                                                         |
| 1596 | Q9UKY7           | 5                    | 6              | 28.7                  | 258    | 27335 | 6.4  | Protein CDV3 homolog                                                                                                                                                                                                         |
| 1597 | Q9Y3C1           | 5                    | 9              | 28.7                  | 178    | 21188 | 9.9  | UPF0384 protein CGI-117                                                                                                                                                                                                      |

| No.  | Accession Number | Unique Peptide Count | Spectrum Count | Sequence Coverage (%) | Length | MolWt | pI   | Descriptive Name                                                                                                                                                                                                                                                                 |
|------|------------------|----------------------|----------------|-----------------------|--------|-------|------|----------------------------------------------------------------------------------------------------------------------------------------------------------------------------------------------------------------------------------------------------------------------------------|
| 1597 | UPI000004EC74    | 5                    | 9              | 28.7                  | 178    | 21148 | 9.9  | hypothetical protein LOC51491                                                                                                                                                                                                                                                    |
| 1598 | Q92572           | 5                    | 21             | 28.5                  | 193    | 21732 | 5.4  | AP-3 complex subunit sigma-1                                                                                                                                                                                                                                                     |
| 1599 | O75663           | 5                    | 8              | 28.3                  | 272    | 31444 | 5.9  | TIP41-like protein                                                                                                                                                                                                                                                               |
| 1600 | P24390           | 5                    | 33             | 28.3                  | 212    | 24542 | 8.6  | ER lumen protein retaining receptor 1                                                                                                                                                                                                                                            |
| 1601 | P49721           | 5                    | 34             | 27.9                  | 201    | 22836 | 7    | Proteasome subunit beta type 2                                                                                                                                                                                                                                                   |
| 1602 | Q43617           | 5                    | 18             | 27.8                  | 180    | 20274 | 5    | Trafficking protein particle complex subunit 3                                                                                                                                                                                                                                   |
| 1603 | Q00688           | 5                    | 28             | 27.7                  | 224    | 25177 | 9.3  | FK506-binding protein 3                                                                                                                                                                                                                                                          |
| 1603 | Q53GD8           | 5                    | 28             | 27.7                  | 224    | 25204 | 9.4  | FK506-binding protein 3 variant                                                                                                                                                                                                                                                  |
| 1604 | Q53SS9           | 5                    | 9              | 27.7                  | 386    | 42963 | 7.8  | Hypothetical protein TIA1                                                                                                                                                                                                                                                        |
| 1604 | Q59G98           | 5                    | 9              | 23.1                  | 464    | 51330 | 7.8  | TIA1 protein variant                                                                                                                                                                                                                                                             |
| 1605 | P53680           | 5                    | 13             | 27.5                  | 142    | 17018 | 6.2  | AP-2 complex subunit sigma-1                                                                                                                                                                                                                                                     |
| 1606 | P11233           | 5                    | 23             | 27.2                  | 206    | 23567 | 7.1  | Ras-related protein Ral-A precursor                                                                                                                                                                                                                                              |
| 1607 | Q9BSH4           | 5                    | 8              | 26.9                  | 297    | 32477 | 8.1  | Coiled-coil domain-containing protein 44                                                                                                                                                                                                                                         |
| 1608 | A3KQT0           | 5                    | 56             | 26.4                  | 201    | 23072 | 10   | Ribosomal protein L10                                                                                                                                                                                                                                                            |
| 1608 | Q6ZWW3           | 5                    | 56             | 24.8                  | 214    | 24604 | 10.1 | 60S ribosomal protein L10                                                                                                                                                                                                                                                        |
| 1608 | Q53FH7           | 5                    | 56             | 24.8                  | 214    | 24543 | 10.1 | Ribosomal protein L10 variant                                                                                                                                                                                                                                                    |
| 1608 | P27635           | 5                    | 56             | 24.8                  | 214    | 24577 | 10.1 | 60S ribosomal protein L10                                                                                                                                                                                                                                                        |
| 1608 | Q5HY50           | 5                    | 56             | 23                    | 230    | 26593 | 10.2 | Ribosomal protein L10                                                                                                                                                                                                                                                            |
| 1609 | P41223           | 5                    | 10             | 26.4                  | 144    | 17000 | 8.8  | Protein BUD31 homolog                                                                                                                                                                                                                                                            |
| 1610 | P83881           | 5                    | 39             | 26.4                  | 106    | 12441 | 10.6 | 60S ribosomal protein L36a                                                                                                                                                                                                                                                       |
| 1610 | UPI00006C193F    | 5                    | 39             | 26.4                  | 106    | 12366 | 10.4 | PREDICTED: similar to large subunit ribosomal protein L36a                                                                                                                                                                                                                       |
| 1610 | UPI00001AFE47    | 5                    | 39             | 26.4                  | 106    | 12475 | 10.4 | PREDICTED: similar to large subunit ribosomal protein L36a                                                                                                                                                                                                                       |
| 1610 | UPI000016174B    | 5                    | 39             | 26.4                  | 106    | 12338 | 10.3 | PREDICTED: similar to large subunit ribosomal protein L36a                                                                                                                                                                                                                       |
| 1611 | P01583           | 5                    | 9              | 26.2                  | 271    | 30607 | 5.2  | Interleukin-1 alpha precursor                                                                                                                                                                                                                                                    |
| 1612 | O60493-4         | 5                    | 15             | 30                    | 140    | 16316 | 6.8  | Isoform 4 of O60493                                                                                                                                                                                                                                                              |
| 1612 | O60493           | 5                    | 15             | 25.9                  | 162    | 18762 | 8.7  | Sorting nexin-3                                                                                                                                                                                                                                                                  |
| 1613 | O00487           | 5                    | 8              | 25.2                  | 310    | 34577 | 6.5  | 26S proteasome non-ATPase regulatory subunit 14                                                                                                                                                                                                                                  |
| 1614 | Q00535           | 5                    | 5              | 25                    | 292    | 33304 | 7.7  | Cell division protein kinase 5                                                                                                                                                                                                                                                   |
| 1615 | Q16270           | 5                    | 6              | 24.8                  | 282    | 29130 | 7.9  | Insulin-like growth factor-binding protein 7 precursor                                                                                                                                                                                                                           |
| 1616 | Q9H9H4           | 5                    | 10             | 24.6                  | 285    | 31307 | 7.3  | Vacuolar protein sorting-associated protein 37 homolog B                                                                                                                                                                                                                         |
| 1617 | O75940           | 5                    | 8              | 24.4                  | 238    | 26711 | 7.3  | Survival of motor neuron-related-splicing factor 30                                                                                                                                                                                                                              |
| 1618 | Q5U071           | 5                    | 19             | 24.5                  | 208    | 23905 | 8.1  | High-mobility group box 2                                                                                                                                                                                                                                                        |
| 1618 | P26583           | 5                    | 19             | 24.4                  | 209    | 24034 | 7.8  | High mobility group protein B2                                                                                                                                                                                                                                                   |
| 1619 | Q9Y2R9           | 5                    | 8              | 24.4                  | 242    | 28162 | 10   | 28S ribosomal protein S7, mitochondrial precursor                                                                                                                                                                                                                                |
| 1619 | UPI000013CBA7    | 5                    | 8              | 24.4                  | 242    | 28134 | 10   | 28S ribosomal protein S7, mitochondrial precursor (S7mt) (MRP-S7) (bMRP-27a) (bMRP-27a).                                                                                                                                                                                         |
| 1620 | Q9BUL8           | 5                    | 14             | 24.1                  | 212    | 24702 | 8.2  | Programmed cell death protein 10                                                                                                                                                                                                                                                 |
| 1621 | Q9H690           | 5                    | 16             | 27.8                  | 291    | 32973 | 7.5  | CDNA: FLJ22484 fis, clone HRC10868                                                                                                                                                                                                                                               |
| 1621 | Q9GZY8           | 5                    | 16             | 23.7                  | 342    | 38465 | 9    | Uncharacterized protein C2orf33                                                                                                                                                                                                                                                  |
| 1622 | UPI00006C03E4    | 5                    | 21             | 57.5                  | 106    | 12581 | 9.4  | PREDICTED: similar to FUS interacting protein (serine-arginine rich) 1                                                                                                                                                                                                           |
| 1622 | Q5JRI1           | 5                    | 21             | 35.5                  | 172    | 20913 | 10.5 | FUS interacting protein (Serine/arginine-rich) 1                                                                                                                                                                                                                                 |
| 1622 | Q5JRI2           | 5                    | 21             | 35.3                  | 173    | 21000 | 10.5 | FUS interacting protein (Serine/arginine-rich) 1                                                                                                                                                                                                                                 |
| 1622 | Q5JRI3           | 5                    | 21             | 33.5                  | 182    | 22135 | 10.3 | FUS interacting protein (Serine/arginine-rich) 1                                                                                                                                                                                                                                 |
| 1622 | Q5JRI4           | 5                    | 21             | 33.3                  | 183    | 22222 | 10.3 | FUS interacting protein (Serine/arginine-rich) 1                                                                                                                                                                                                                                 |
| 1622 | UPI0000DD7961    | 5                    | 21             | 25                    | 244    | 29195 | 11.1 | PREDICTED: similar to FUS-interacting serine-arginine-rich protein 1 (TLS-associated protein with Ser-Arg repeats) (TLS-associated protein with SR repeats) (TASR) (TLS-associated serine-arginine protein) (TLS-associated SR protein) (Neural-specific SR protein... isoform 3 |
| 1622 | Q5JRI0           | 5                    | 21             | 23.4                  | 261    | 31213 | 11.3 | FUS interacting protein (Serine/arginine-rich) 1                                                                                                                                                                                                                                 |
| 1622 | O75494           | 5                    | 21             | 23.3                  | 262    | 31301 | 11.3 | FUS-interacting serine-arginine-rich protein 1                                                                                                                                                                                                                                   |
| 1622 | Q53GD7           | 5                    | 21             | 23.3                  | 262    | 31282 | 11.3 | FUS interacting protein (Serine-arginine rich) 1 isoform 2 variant                                                                                                                                                                                                               |
| 1623 | Q5SQ52           | 5                    | 19             | 26.9                  | 186    | 21609 | 4.9  | Casein kinase 2, beta polypeptide                                                                                                                                                                                                                                                |
| 1623 | P67870           | 5                    | 19             | 23.3                  | 215    | 24942 | 5.6  | Casein kinase II subunit beta                                                                                                                                                                                                                                                    |
| 1623 | Q5SRQ6           | 5                    | 19             | 21.4                  | 234    | 26926 | 6    | Casein kinase 2, beta polypeptide                                                                                                                                                                                                                                                |
| 1624 | Q4W5A9           | 5                    | 9              | 23.3                  | 309    | 34359 | 4.7  | Hypothetical protein SET7                                                                                                                                                                                                                                                        |
| 1624 | Q8WTS6           | 5                    | 9              | 19.7                  | 366    | 40721 | 4.6  | Histone-lysine N-methyltransferase, H3 lysine-4 specific SET7                                                                                                                                                                                                                    |
| 1625 | Q96A35           | 5                    | 14             | 23.1                  | 216    | 24915 | 9.3  | 39S ribosomal protein L24, mitochondrial precursor                                                                                                                                                                                                                               |
| 1626 | Q969G5           | 5                    | 23             | 23                    | 261    | 27642 | 6.2  | Protein kinase C delta-binding protein                                                                                                                                                                                                                                           |
| 1626 | UPI000013E910    | 5                    | 23             | 23                    | 261    | 27701 | 6.4  | protein kinase C, delta binding protein                                                                                                                                                                                                                                          |
| 1627 | P53597           | 5                    | 16             | 22.8                  | 333    | 35047 | 8.9  | Succinyl-CoA ligase [GDP-forming] subunit alpha, mitochondrial precursor                                                                                                                                                                                                         |
| 1627 | UPI000014BF59    | 5                    | 16             | 22                    | 346    | 36250 | 8.8  | succinate-CoA ligase, GDP-forming, alpha subunit                                                                                                                                                                                                                                 |
| 1628 | P31431           | 5                    | 14             | 22.7                  | 198    | 21642 | 4.5  | Syndecan-4 precursor                                                                                                                                                                                                                                                             |
| 1628 | Q53FN9           | 5                    | 14             | 22.7                  | 198    | 21608 | 4.5  | Syndecan 4 variant                                                                                                                                                                                                                                                               |
| 1629 | P52815           | 5                    | 24             | 22.7                  | 198    | 21348 | 8.9  | 39S ribosomal protein L12, mitochondrial precursor                                                                                                                                                                                                                               |
| 1630 | UPI0000D611BE    | 5                    | 17             | 22.9                  | 214    | 24962 | 7    | Mps one binder kinase activator-like 1B (Mob1 homolog 1B) (Mob1 alpha) (Mob1A) (Protein Mob4B).                                                                                                                                                                                  |
| 1630 | Q9H8S9           | 5                    | 17             | 22.7                  | 216    | 25080 | 7    | Mps one binder kinase activator-like 1B                                                                                                                                                                                                                                          |

| No.  | Accession Number | Unique Peptide Count | Spectrum Count | Sequence Coverage (%) | Length | MolWt | pI   | Descriptive Name                                                                                                                                                                                                   |
|------|------------------|----------------------|----------------|-----------------------|--------|-------|------|--------------------------------------------------------------------------------------------------------------------------------------------------------------------------------------------------------------------|
| 1630 | UPI0000D611BD    | 5                    | 17             | 22.7                  | 216    | 25122 | 7    | Mps one binder kinase activator-like 1B (Mob1 homolog 1B) (Mob1 alpha) (Mob1A) (Protein Mob4B).                                                                                                                    |
| 1630 | UPI0000047AC8    | 5                    | 17             | 22.7                  | 216    | 25008 | 7.2  | Mob4B protein                                                                                                                                                                                                      |
| 1631 | Q04323           | 5                    | 8              | 22.6                  | 297    | 33325 | 5.3  | SAPK substrate protein 1                                                                                                                                                                                           |
| 1631 | Q04323-2         | 5                    | 8              | 21.5                  | 312    | 35107 | 5.3  | Isoform 2 of Q04323                                                                                                                                                                                                |
| 1632 | Q96DH6-2         | 5                    | 7              | 29.5                  | 251    | 28421 | 8.5  | Isoform 2 of Q96DH6                                                                                                                                                                                                |
| 1632 | Q96DH6           | 5                    | 7              | 22.6                  | 328    | 35197 | 8.5  | RNA-binding protein Musashi homolog 2                                                                                                                                                                              |
| 1633 | P41236           | 5                    | 9              | 22.4                  | 205    | 23015 | 4.7  | Protein phosphatase inhibitor 2                                                                                                                                                                                    |
| 1634 | Q8IWR8           | 5                    | 48             | 25.4                  | 173    | 20820 | 11.4 | Ribosomal protein L19                                                                                                                                                                                              |
| 1634 | UPI0000192A4A    | 5                    | 48             | 22.6                  | 195    | 23335 | 11.5 | 60S ribosomal protein L19.                                                                                                                                                                                         |
| 1634 | P84098           | 5                    | 48             | 22.4                  | 196    | 23466 | 11.5 | 60S ribosomal protein L19                                                                                                                                                                                          |
| 1634 | Q53G49           | 5                    | 48             | 22.4                  | 196    | 23467 | 11.4 | Ribosomal protein L19 variant                                                                                                                                                                                      |
| 1635 | Q14919           | 5                    | 18             | 22.4                  | 205    | 22350 | 5.2  | Dr1-associated corepressor                                                                                                                                                                                         |
| 1635 | Q14919-2         | 5                    | 18             | 21.8                  | 211    | 23148 | 5.3  | Isoform 2 of Q14919                                                                                                                                                                                                |
| 1635 | UPI0000D62635    | 5                    | 18             | 21.7                  | 212    | 23205 | 5.3  | Dr1-associated corepressor (Dr1-associated protein 1) (Negative co- factor 2 alpha) (NC2 alpha).                                                                                                                   |
| 1636 | Q8N5D1           | 5                    | 14             | 22.2                  | 230    | 27086 | 10.3 | MRPL47 protein                                                                                                                                                                                                     |
| 1636 | UPI000013D022    | 5                    | 14             | 20.4                  | 250    | 29450 | 10.4 | mitochondrial ribosomal protein L47 isoform a                                                                                                                                                                      |
| 1636 | UPI0000D61BB3    | 5                    | 14             | 20.2                  | 252    | 29787 | 10.4 | 39S ribosomal protein L47, mitochondrial precursor (L47mt) (MRP-L47).                                                                                                                                              |
| 1636 | Q9HD33           | 5                    | 14             | 20.2                  | 252    | 29577 | 10.3 | 39S ribosomal protein L47, mitochondrial precursor                                                                                                                                                                 |
| 1637 | Q07021           | 5                    | 41             | 22                    | 282    | 31362 | 4.8  | Complement component 1 Q subcomponent-binding protein, mitochondrial precursor                                                                                                                                     |
| 1638 | O43402           | 5                    | 7              | 21.9                  | 210    | 23773 | 6.4  | Neighbor of COX4                                                                                                                                                                                                   |
| 1639 | UPI00006D2BD0    | 5                    | 10             | 24                    | 208    | 22627 | 8.5  | Acyl-protein thioesterase 2 (EC 3.1.2.-) (Lysophospholipase II) (LPL- I).                                                                                                                                          |
| 1639 | Q95372           | 5                    | 10             | 21.6                  | 231    | 24737 | 7.2  | Acyl-protein thioesterase 2                                                                                                                                                                                        |
| 1640 | Q6DK11           | 5                    | 13             | 21.5                  | 246    | 28661 | 10.5 | Ribosomal protein L7-like 1                                                                                                                                                                                        |
| 1641 | P11908           | 5                    | 10             | 21.4                  | 318    | 34769 | 6.6  | Ribose-phosphate pyrophosphokinase II                                                                                                                                                                              |
| 1641 | Q0VDI0           | 5                    | 10             | 21.2                  | 321    | 35054 | 6.4  | Phosphoribosyl pyrophosphate synthetase 2                                                                                                                                                                          |
| 1642 | Q1XII0           | 5                    | 6              | 26.2                  | 260    | 29326 | 6.8  | Bone marrow stromal cell antigen 1 nirs variant 1                                                                                                                                                                  |
| 1642 | Q10588           | 5                    | 6              | 21.4                  | 318    | 35724 | 7.8  | ADP-ribosyl cyclase 2 precursor                                                                                                                                                                                    |
| 1642 | UPI0000126AFB    | 5                    | 6              | 21.4                  | 318    | 35738 | 7.8  | bone marrow stromal cell antigen 1 precursor                                                                                                                                                                       |
| 1642 | UPI000066D9E4    | 5                    | 6              | 20.4                  | 333    | 37482 | 8    | ADP-ribosyl cyclase 2 precursor (EC 3.2.2.5) (Cyclic ADP-ribose hydrolase 2) (cADPr hydrolase 2) (Bone marrow stromal antigen 1) (BST- 1) (CD157 antigen).                                                         |
| 1643 | Q969X5-2         | 5                    | 11             | 31.3                  | 198    | 22160 | 9.1  | Isoform 2 of Q969X5                                                                                                                                                                                                |
| 1643 | Q969X5           | 5                    | 11             | 21.4                  | 290    | 32592 | 7.1  | Endoplasmic reticulum-Golgi intermediate compartment protein 1                                                                                                                                                     |
| 1644 | Q00765           | 5                    | 27             | 21.2                  | 189    | 21493 | 8.1  | Receptor expression-enhancing protein 5                                                                                                                                                                            |
| 1645 | Q8NBX0           | 5                    | 21             | 21.2                  | 429    | 47151 | 9.1  | Probable saccharopine dehydrogenase                                                                                                                                                                                |
| 1646 | Q9BYG3           | 5                    | 10             | 21.2                  | 293    | 34222 | 9.9  | MKI67 FHA domain-interacting nucleolar phosphoprotein                                                                                                                                                              |
| 1646 | UPI000006F493    | 5                    | 10             | 21.2                  | 293    | 34253 | 9.9  | MKI67 (FHA domain) interacting nucleolar phosphoprotein                                                                                                                                                            |
| 1647 | Q9H7Z7           | 5                    | 9              | 21.2                  | 377    | 41943 | 9.2  | Prostaglandin E synthase 2 (EC 5.3.99.3) (Microsomal prostaglandin E synthase 2) (mPGES-2) [Contains: Prostaglandin E synthase 2 truncated form]                                                                   |
| 1648 | P54709           | 5                    | 35             | 21.1                  | 279    | 31513 | 8.3  | Sodium/potassium-transporting ATPase subunit beta-3                                                                                                                                                                |
| 1649 | Q8TC12           | 5                    | 12             | 21.1                  | 318    | 35386 | 8.8  | Retinol dehydrogenase 11                                                                                                                                                                                           |
| 1649 | UPI0000D6241F    | 5                    | 12             | 21.1                  | 318    | 35415 | 8.9  | Retinol dehydrogenase 11 (EC 1.1.1.-) (Retinal reductase 1) (RalR1) (Prostate short-chain dehydrogenase/reductase 1) (Androgen-regulated short-chain dehydrogenase/reductase 1) (HCV core-binding protein HCBP12). |
| 1649 | UPI0000070F53    | 5                    | 12             | 21.1                  | 318    | 35414 | 8.8  | androgen-regulated short-chain dehydrogenase/reductase 1                                                                                                                                                           |
| 1650 | Q5RKV6           | 5                    | 9              | 21                    | 272    | 28235 | 6.3  | Exosome component 6                                                                                                                                                                                                |
| 1651 | UPI000049E0CA    | 5                    | 19             | 22.3                  | 229    | 24770 | 7.9  | Collagen triple helix repeat-containing protein 1 precursor (NMTC1 protein).                                                                                                                                       |
| 1651 | Q96CG8           | 5                    | 19             | 21                    | 243    | 26224 | 8    | Collagen triple helix repeat-containing protein 1 precursor                                                                                                                                                        |
| 1652 | O76054           | 5                    | 6              | 20.8                  | 403    | 46145 | 7.8  | SEC14-like protein 2                                                                                                                                                                                               |
| 1652 | Q53EQ2           | 5                    | 6              | 20.8                  | 403    | 46117 | 7.8  | SEC14-like 2 variant                                                                                                                                                                                               |
| 1653 | P25774           | 5                    | 8              | 20.8                  | 331    | 37496 | 8.3  | Cathepsin S precursor                                                                                                                                                                                              |
| 1653 | Q6FHS5           | 5                    | 8              | 20.8                  | 331    | 37526 | 8.2  | CTSS protein                                                                                                                                                                                                       |
| 1654 | Q01081           | 5                    | 19             | 20.8                  | 240    | 27872 | 8.8  | Splicing factor U2AF 35 kDa subunit                                                                                                                                                                                |
| 1655 | UPI0000456FB4    | 5                    | 7              | 21.6                  | 287    | 31935 | 8.1  | Uncharacterized protein C20orf43.                                                                                                                                                                                  |
| 1655 | Q9BY42-2         | 5                    | 7              | 21.6                  | 287    | 31903 | 8.1  | Isoform 2 of Q9BY42                                                                                                                                                                                                |
| 1655 | Q9BY42           | 5                    | 7              | 20.3                  | 306    | 33855 | 8.6  | Uncharacterized protein C20orf43                                                                                                                                                                                   |
| 1655 | UPI000013C542    | 5                    | 7              | 20.3                  | 306    | 33887 | 8.6  | Uncharacterized protein C20orf43.                                                                                                                                                                                  |
| 1656 | P27105           | 5                    | 15             | 20.1                  | 288    | 31731 | 7.9  | Erythrocyte band 7 integral membrane protein                                                                                                                                                                       |
| 1657 | Q5QPQ6           | 5                    | 6              | 21.7                  | 300    | 31735 | 7.6  | 3-hydroxymethyl-3-methylglutaryl-Coenzyme A lyase                                                                                                                                                                  |

| No.  | Accession Number | Unique Peptide Count | Spectrum Count | Sequence Coverage (%) | Length | MolWt  | pI   | Descriptive Name                                                                                                                                               |
|------|------------------|----------------------|----------------|-----------------------|--------|--------|------|----------------------------------------------------------------------------------------------------------------------------------------------------------------|
| 1657 | P35914           | 5                    | 6              | 20                    | 325    | 34360  | 8.5  | Hydroxymethylglutaryl-CoA lyase, mitochondrial precursor                                                                                                       |
| 1658 | Q99541           | 5                    | 5              | 19.9                  | 437    | 48075  | 6.8  | Adipophilin                                                                                                                                                    |
| 1659 | P01584           | 5                    | 15             | 19.7                  | 269    | 30748  | 4.8  | Interleukin-1 beta precursor                                                                                                                                   |
| 1659 | Q53X59           | 5                    | 15             | 19.7                  | 269    | 30747  | 4.9  | IL1B protein                                                                                                                                                   |
| 1660 | O75934           | 5                    | 7              | 19.6                  | 225    | 26131  | 5.6  | Breast carcinoma amplified sequence 2                                                                                                                          |
| 1661 | Q7Z2Q5           | 5                    | 8              | 20                    | 429    | 46405  | 6.6  | C-terminal binding protein 1                                                                                                                                   |
| 1661 | Q13363           | 5                    | 8              | 19.5                  | 440    | 47535  | 6.8  | C-terminal-binding protein 1                                                                                                                                   |
| 1662 | Q5U000           | 5                    | 31             | 19.5                  | 303    | 33868  | 7.1  | Cathepsin Z                                                                                                                                                    |
| 1663 | UPI0000074210    | 5                    | 13             | 19.5                  | 329    | 35886  | 8.3  | NADP-dependent leukotriene B4 12-hydroxydehydrogenase                                                                                                          |
| 1664 | Q15435-2         | 5                    | 14             | 21.5                  | 317    | 36837  | 5.2  | Isoform 2 of Q15435                                                                                                                                            |
| 1664 | Q15435           | 5                    | 14             | 18.9                  | 360    | 41564  | 4.9  | Protein phosphatase 1 regulatory subunit 7                                                                                                                     |
| 1665 | UPI000041C7E5    | 5                    | 8              | 21.6                  | 305    | 34756  | 8.4  | replication factor C 3 isoform 2                                                                                                                               |
| 1665 | P40938           | 5                    | 8              | 18.5                  | 356    | 40556  | 8.3  | Replication factor C subunit 3                                                                                                                                 |
| 1666 | Q658J0           | 5                    | 9              | 20.5                  | 332    | 37029  | 6.5  | Hypothetical protein DKFZp762L015                                                                                                                              |
| 1666 | Q9GZT8           | 5                    | 9              | 19.4                  | 350    | 38984  | 6.4  | NIF3-like protein 1                                                                                                                                            |
| 1666 | Q53TX4           | 5                    | 9              | 18                    | 377    | 41968  | 6.7  | Hypothetical protein NIF3L1                                                                                                                                    |
| 1667 | Q99848           | 5                    | 6              | 18                    | 306    | 34852  | 10.1 | Probable rRNA-processing protein EBP2                                                                                                                          |
| 1667 | UPI0000129B3E    | 5                    | 6              | 18                    | 306    | 34820  | 10.1 | EBNA1 binding protein 2                                                                                                                                        |
| 1668 | Q12792-2         | 5                    | 5              | 18.9                  | 350    | 40283  | 7    | Isoform 1 of Q12792                                                                                                                                            |
| 1668 | Q12792           | 5                    | 5              | 17.9                  | 368    | 42209  | 7    | Twinfilin-1                                                                                                                                                    |
| 1668 | UPI0000D621D3    | 5                    | 5              | 17.9                  | 368    | 42362  | 7.6  | Twinfilin-1 (Protein A6) (Protein tyrosine kinase 9).                                                                                                          |
| 1668 | Q6NUK9           | 5                    | 5              | 17.7                  | 372    | 42389  | 7.3  | TWF1 protein                                                                                                                                                   |
| 1669 | Q96GG9           | 5                    | 7              | 17.8                  | 259    | 30124  | 5.3  | DCN1-like protein 1                                                                                                                                            |
| 1669 | UPI000013E0D4    | 5                    | 7              | 17.8                  | 258    | 29993  | 5.3  | DCN1-like protein 1 (Defective in cullin neddylation protein 1-like protein 1) (DCUN1 domain-containing protein 1) (Squamous cell carcinoma-related oncogene). |
| 1670 | Q68D08           | 5                    | 15             | 17.6                  | 324    | 36750  | 6.1  | Hypothetical protein DKFZp686B04128                                                                                                                            |
| 1670 | Q9NUQ9           | 5                    | 15             | 17.6                  | 324    | 36748  | 6.1  | Protein FAM49B                                                                                                                                                 |
| 1671 | P30519           | 5                    | 8              | 17.4                  | 316    | 36033  | 5.4  | Heme oxygenase 2                                                                                                                                               |
| 1671 | Q6IBP2           | 5                    | 8              | 17.4                  | 316    | 36015  | 5.4  | HMOX2 protein                                                                                                                                                  |
| 1671 | Q6FHB5           | 5                    | 8              | 17.4                  | 316    | 36049  | 5.4  | HMOX2 protein                                                                                                                                                  |
| 1671 | Q53HF1           | 5                    | 8              | 17.4                  | 316    | 35934  | 5.4  | Heme oxygenase (Decyclizing) 2 variant                                                                                                                         |
| 1672 | P53007           | 5                    | 15             | 17.4                  | 311    | 34013  | 9.9  | Tricarboxylate transport protein, mitochondrial precursor                                                                                                      |
| 1672 | Q6LAP8           | 5                    | 15             | 17                    | 318    | 34788  | 9.9  | Mitochondrial citrate transport protein                                                                                                                        |
| 1673 | Q15654           | 5                    | 5              | 17.4                  | 476    | 50288  | 7.4  | Thyroid receptor-interacting protein 6                                                                                                                         |
| 1674 | Q8NFK8           | 5                    | 14             | 17.4                  | 470    | 51263  | 5    | Torsin-1A-interacting protein 2                                                                                                                                |
| 1675 | Q9BZK7           | 5                    | 7              | 17.1                  | 514    | 55595  | 5.6  | F-box-like/WD repeat protein TBL1XR1                                                                                                                           |
| 1676 | Q9H0V9           | 5                    | 7              | 17                    | 348    | 39711  | 8.4  | VIP36-like protein precursor                                                                                                                                   |
| 1676 | Q9H0V9-2         | 5                    | 7              | 16.4                  | 359    | 40982  | 8.9  | Isoform 2 of Q9H0V9                                                                                                                                            |
| 1677 | Q9ULA0           | 5                    | 8              | 17.3                  | 475    | 52428  | 7.4  | Aspartyl aminopeptidase                                                                                                                                        |
| 1677 | Q53SB6           | 5                    | 8              | 16.9                  | 485    | 53439  | 7.6  | Hypothetical protein DNPEP                                                                                                                                     |
| 1678 | Q8WVY7           | 5                    | 9              | 16.7                  | 318    | 36805  | 6.5  | Ubiquitin-like domain-containing CTD phosphatase 1                                                                                                             |
| 1678 | UPI000007368C    | 5                    | 9              | 16.7                  | 318    | 36733  | 6.7  | ubiquitin-like domain containing CTD phosphatase 1                                                                                                             |
| 1679 | Q96HS5           | 5                    | 7              | 36.9                  | 179    | 21021  | 7.9  | PSCD3 protein                                                                                                                                                  |
| 1679 | Q75MW6           | 5                    | 7              | 17.1                  | 387    | 45231  | 5.9  | Hypothetical protein PSCD3                                                                                                                                     |
| 1679 | A4D2N8           | 5                    | 7              | 16.5                  | 399    | 46292  | 5.5  | Pleckstrin homology, Sec7 and coiled-coil domains 3                                                                                                            |
| 1679 | Q43739           | 5                    | 7              | 16.5                  | 400    | 46349  | 5.5  | Cytohesin-3                                                                                                                                                    |
| 1680 | Q9UIC9           | 5                    | 8              | 16.5                  | 303    | 34814  | 5.9  | Serine/threonine protein phosphatase catalytic subunit                                                                                                         |
| 1680 | O00743           | 5                    | 8              | 16.4                  | 305    | 35144  | 5.7  | Serine/threonine-protein phosphatase 6                                                                                                                         |
| 1681 | P52294           | 5                    | 7              | 16.4                  | 538    | 60249  | 5    | Importin alpha-1 subunit                                                                                                                                       |
| 1681 | UPI000013D524    | 5                    | 7              | 16.4                  | 538    | 60222  | 5    | Importin alpha-1 subunit (Karyopherin alpha-1 subunit) (SRP1-beta) (RAG cohort protein 2) (Nucleoprotein interactor 1) (NPI-1).                                |
| 1681 | Q5BKZ2           | 5                    | 7              | 16.4                  | 538    | 60309  | 5    | Karyopherin alpha 1                                                                                                                                            |
| 1682 | Q14151           | 5                    | 12             | 16.4                  | 953    | 107474 | 6.2  | Scaffold attachment factor B2                                                                                                                                  |
| 1683 | Q9NZU5           | 5                    | 5              | 16.4                  | 365    | 40833  | 7.9  | LIM and cysteine-rich domains protein 1                                                                                                                        |
| 1684 | O75436           | 5                    | 9              | 16.2                  | 327    | 38170  | 6.5  | Vacuolar protein sorting-associated protein 26A                                                                                                                |
| 1685 | Q9Y2S7           | 5                    | 5              | 15.8                  | 368    | 42033  | 8.6  | Polymerase delta-interacting protein 2                                                                                                                         |
| 1685 | UPI000013C4D8    | 5                    | 5              | 15.8                  | 367    | 41934  | 8.6  | Polymerase delta-interacting protein 2 (38 kDa DNA polymerase delta interaction protein) (p38).                                                                |
| 1686 | Q53FH8           | 5                    | 6              | 15.6                  | 404    | 46816  | 7.1  | Sorting nexin 5 variant                                                                                                                                        |
| 1686 | Q9Y5X3           | 5                    | 6              | 15.6                  | 404    | 46817  | 6.8  | Sorting nexin-5                                                                                                                                                |
| 1686 | Q6P5V6           | 5                    | 6              | 15.3                  | 412    | 47438  | 7.5  | SNX5 protein                                                                                                                                                   |
| 1687 | Q9UI12-2         | 5                    | 14             | 16.1                  | 465    | 54151  | 6.5  | Isoform 2 of Q9UI12                                                                                                                                            |
| 1687 | Q9UI12           | 5                    | 14             | 15.5                  | 483    | 55883  | 6.5  | Vacuolar ATP synthase subunit H                                                                                                                                |
| 1688 | Q53F73           | 5                    | 9              | 15.4                  | 305    | 34114  | 9.5  | Cytochrome b5 reductase 1                                                                                                                                      |
| 1688 | Q9UHQ9           | 5                    | 9              | 15.4                  | 305    | 34095  | 9.4  | NADH-cytochrome b5 reductase isoform                                                                                                                           |
| 1688 | Q8NCL5           | 5                    | 9              | 15.4                  | 305    | 34035  | 9.4  | CDNA FLJ90173 fis, clone MAMMA1000457, highly similar to Cytochrome b5 reductase 1                                                                             |

| No.  | Accession Number | Unique Peptide Count | Spectrum Count | Sequence Coverage (%) | Length | MolWt | pI  | Descriptive Name                                                                                                                                                                                                                      |
|------|------------------|----------------------|----------------|-----------------------|--------|-------|-----|---------------------------------------------------------------------------------------------------------------------------------------------------------------------------------------------------------------------------------------|
| 1689 | Q13510           | 5                    | 18             | 15.2                  | 395    | 44650 | 7.6 | Acid ceramidase precursor (EC 3.5.1.23) (Acylsphingosine deacylase) (N-acylsphingosine amidohydrolase) (AC) (Putative 32 kDa heart protein) (PHP32) [Contains: Acid ceramidase subunit alpha; Acid ceramidase subunit beta]           |
| 1689 | Q53H01           | 5                    | 18             | 15.2                  | 395    | 44692 | 7.6 | N-acylsphingosine amidohydrolase (Acid ceramidase) 1 preproprotein isoform a variant                                                                                                                                                  |
| 1689 | UPI0000190976    | 5                    | 18             | 14.6                  | 411    | 46494 | 7.9 | N-acylsphingosine amidohydrolase (acid ceramidase) 1 isoform b                                                                                                                                                                        |
| 1690 | P37198           | 5                    | 9              | 15.1                  | 522    | 53255 | 5.3 | Nuclear pore glycoprotein p62                                                                                                                                                                                                         |
| 1691 | UPI00004561A1    | 5                    | 19             | 16                    | 419    | 45958 | 7.6 | KH domain-containing, RNA-binding, signal transduction-associated protein 1 (p21 Ras GTPase-activating protein-associated p62) (GAP-associated tyrosine phosphoprotein p62) (Src-associated in mitosis 68 kDa protein) (Sam68) (p68). |
| 1691 | Q07666-2         | 5                    | 19             | 16                    | 418    | 45861 | 7.6 | Isoform 2 of Q07666                                                                                                                                                                                                                   |
| 1691 | Q07666           | 5                    | 19             | 15.1                  | 443    | 48227 | 8.7 | KH domain-containing, RNA-binding, signal transduction-associated protein 1                                                                                                                                                           |
| 1692 | O75886           | 5                    | 5              | 15                    | 525    | 58164 | 5.1 | Signal transducing adaptor molecule 2                                                                                                                                                                                                 |
| 1692 | UPI0000167B90    | 5                    | 5              | 15                    | 525    | 58193 | 5   | signal transducing adaptor molecule 2                                                                                                                                                                                                 |
| 1693 | Q8N5Y3           | 5                    | 25             | 15.7                  | 331    | 37246 | 5.4 | GYG1 protein                                                                                                                                                                                                                          |
| 1693 | Q6FHZ1           | 5                    | 25             | 15.6                  | 333    | 37479 | 5.4 | GYG protein                                                                                                                                                                                                                           |
| 1693 | P46976           | 5                    | 25             | 14.9                  | 350    | 39384 | 5.5 | Glycogenin-1                                                                                                                                                                                                                          |
| 1694 | Q9UH62           | 5                    | 7              | 14.8                  | 379    | 42501 | 8.4 | Armadillo repeat-containing X-linked protein 3                                                                                                                                                                                        |
| 1695 | UPI0000D62170    | 5                    | 8              | 17.7                  | 395    | 44603 | 5.6 | Ataxin-10 (Spinocerebellar ataxia type 10 protein) (Brain protein E46 homolog).                                                                                                                                                       |
| 1695 | Q9UBB4           | 5                    | 8              | 14.7                  | 475    | 53489 | 5.2 | Ataxin-10                                                                                                                                                                                                                             |
| 1696 | O14929           | 5                    | 7              | 14.6                  | 419    | 49513 | 5.7 | Histone acetyltransferase type B catalytic subunit                                                                                                                                                                                    |
| 1697 | Q5M8T4           | 5                    | 7              | 14.6                  | 349    | 38069 | 7.9 | Connective tissue growth factor                                                                                                                                                                                                       |
| 1697 | Q6FHL8           | 5                    | 7              | 14.6                  | 349    | 38129 | 7.9 | CTGF protein                                                                                                                                                                                                                          |
| 1698 | O15382-2         | 5                    | 5              | 18.7                  | 300    | 33777 | 7.7 | Isoform B of O15382                                                                                                                                                                                                                   |
| 1698 | O15382           | 5                    | 5              | 14.3                  | 392    | 44288 | 8.6 | Branched-chain-amino-acid aminotransferase, mitochondrial precursor (EC 2.6.1.42) (BCAT(m))                                                                                                                                           |
| 1698 | Q53EW7           | 5                    | 5              | 14.3                  | 392    | 44274 | 8.5 | Branched chain aminotransferase 2, mitochondrial variant                                                                                                                                                                              |
| 1699 | Q13610           | 5                    | 10             | 14.2                  | 501    | 55828 | 4.8 | Periodic tryptophan protein 1 homolog                                                                                                                                                                                                 |
| 1699 | Q9BV37           | 5                    | 10             | 14.2                  | 501    | 55879 | 4.8 | PWP1 homolog                                                                                                                                                                                                                          |
| 1699 | Q53FW9           | 5                    | 10             | 14.2                  | 501    | 55729 | 4.7 | Nuclear phosphoprotein similar to <i>S. cerevisiae</i> PWP1 variant                                                                                                                                                                   |
| 1700 | UPI0000DD87AF    | 5                    | 7              | 14.3                  | 615    | 68209 | 7   | PREDICTED: similar to kinesin light chain 2                                                                                                                                                                                           |
| 1700 | Q9H0B6           | 5                    | 7              | 14.1                  | 622    | 68935 | 7.2 | Kinesin light chain 2                                                                                                                                                                                                                 |
| 1701 | P30566           | 5                    | 9              | 14                    | 484    | 54889 | 7.1 | Adenylosuccinate lyase                                                                                                                                                                                                                |
| 1701 | Q71UA4           | 5                    | 9              | 14                    | 484    | 54871 | 7.1 | Adenylosuccinate lyase                                                                                                                                                                                                                |
| 1702 | Q6I9S2           | 5                    | 6              | 13.8                  | 536    | 61449 | 9.5 | SNW1 protein                                                                                                                                                                                                                          |
| 1703 | Q6IP98           | 5                    | 23             | 13.8                  | 349    | 40317 | 4.9 | KRT17 protein                                                                                                                                                                                                                         |
| 1704 | Q15437           | 5                    | 12             | 13.6                  | 767    | 86479 | 6.9 | Protein transport protein Sec23B                                                                                                                                                                                                      |
| 1704 | Q503A9           | 5                    | 12             | 13.6                  | 767    | 86495 | 6.9 | Sec23 homolog B                                                                                                                                                                                                                       |
| 1705 | Q9NY61           | 5                    | 8              | 13.4                  | 560    | 63133 | 4.9 | Protein AATF                                                                                                                                                                                                                          |
| 1705 | UPI000013C869    | 5                    | 8              | 13.3                  | 562    | 63291 | 4.9 | Protein AATF (Apoptosis-antagonizing transcription factor) (Rb-binding protein Che-1).                                                                                                                                                |
| 1706 | Q00613-2         | 5                    | 8              | 14.3                  | 489    | 52881 | 6.1 | Isoform Short of Q00613                                                                                                                                                                                                               |
| 1706 | UPI0000DD7F38    | 5                    | 8              | 13.5                  | 518    | 56201 | 5.7 | PREDICTED: similar to Heat shock factor protein 1 (HSF 1) (Heat shock transcription factor 1) (HSTF 1)                                                                                                                                |
| 1706 | UPI0000DD7F05    | 5                    | 8              | 13.5                  | 518    | 56205 | 5.7 | PREDICTED: similar to Heat shock factor protein 1 (HSF 1) (Heat shock transcription factor 1) (HSTF 1)                                                                                                                                |
| 1706 | Q00613           | 5                    | 8              | 13.2                  | 529    | 57261 | 5.2 | Heat shock factor protein 1                                                                                                                                                                                                           |
| 1707 | Q8N7H5           | 5                    | 5              | 12.8                  | 485    | 55501 | 5.4 | CDNA FLJ25557 fis, clone JTH02756                                                                                                                                                                                                     |
| 1707 | Q9NUU9           | 5                    | 5              | 11.7                  | 531    | 59798 | 4.6 | CDNA FLJ11123 fis, clone PLACE1006167                                                                                                                                                                                                 |
| 1707 | Q9H166           | 5                    | 5              | 11.7                  | 531    | 59976 | 4.6 | RNA polymerase-associated protein 1 homolog                                                                                                                                                                                           |
| 1708 | Q8N422           | 5                    | 7              | 12.6                  | 381    | 43073 | 5.7 | Protein kinase, cAMP-dependent, regulatory, type I, beta                                                                                                                                                                              |
| 1708 | UPI0000DD7E3F    | 5                    | 7              | 12.6                  | 381    | 43011 | 5.7 | PREDICTED: similar to protein kinase, cAMP-dependent, regulatory, type I, beta                                                                                                                                                        |
| 1709 | O15427           | 5                    | 24             | 12.5                  | 465    | 49469 | 8   | Monocarboxylate transporter 4                                                                                                                                                                                                         |
| 1709 | Q53G91           | 5                    | 24             | 12.5                  | 465    | 49483 | 8   | Solute carrier family 16, member 3 variant                                                                                                                                                                                            |
| 1710 | Q59F45           | 5                    | 11             | 13.7                  | 386    | 43659 | 6.8 | MAD, mothers against decapentaplegic homolog 3 variant                                                                                                                                                                                |
| 1710 | P84022           | 5                    | 11             | 12.5                  | 425    | 48081 | 7.2 | Mothers against decapentaplegic homolog 3                                                                                                                                                                                             |
| 1711 | Q53HC4           | 5                    | 7              | 12.4                  | 469    | 51904 | 7.1 | CGI-51 protein variant                                                                                                                                                                                                                |
| 1711 | Q9Y512           | 5                    | 7              | 12.4                  | 469    | 51976 | 6.9 | Sorting and assembly machinery component 50 homolog                                                                                                                                                                                   |
| 1712 | Q53EL7           | 5                    | 5              | 12.2                  | 584    | 61692 | 8.1 | Interferon regulatory factor 2-binding protein 1                                                                                                                                                                                      |
| 1712 | Q8IU81           | 5                    | 5              | 12.2                  | 584    | 61688 | 8.2 | Interferon regulatory factor 2 binding protein 1                                                                                                                                                                                      |
| 1712 | Q6DC95           | 5                    | 5              | 12.2                  | 584    | 61617 | 8   | Interferon regulatory factor 2 binding protein 1                                                                                                                                                                                      |
| 1713 | Q9H4A4           | 5                    | 6              | 12.2                  | 650    | 72596 | 5.8 | Aminopeptidase B                                                                                                                                                                                                                      |
| 1714 | O60678           | 5                    | 7              | 12.1                  | 531    | 59903 | 5.3 | Protein arginine N-methyltransferase 3                                                                                                                                                                                                |
| 1714 | UPI0000198DED    | 5                    | 7              | 12.1                  | 531    | 59876 | 5.3 | Protein arginine N-methyltransferase 3 (EC 2.1.1.-) (Heterogeneous nuclear ribonucleoprotein methyltransferase-like protein 3).                                                                                                       |

| No.  | Accession Number | Unique Peptide Count | Spectrum Count | Sequence Coverage (%) | Length | MolWt  | pI  | Descriptive Name                                                                                                                                                                                                                           |
|------|------------------|----------------------|----------------|-----------------------|--------|--------|-----|--------------------------------------------------------------------------------------------------------------------------------------------------------------------------------------------------------------------------------------------|
| 1714 | UPI00001AFD06    | 5                    | 7              | 11.7                  | 548    | 61841  | 7.3 | Protein arginine N-methyltransferase 3 (EC 2.1.1.-) (Heterogeneous nuclear ribonucleoprotein methyltransferase-like protein 3).                                                                                                            |
| 1714 | Q8WUV3           | 5                    | 7              | 11.7                  | 548    | 61967  | 7.4 | PRMT3 protein                                                                                                                                                                                                                              |
| 1715 | Q15067           | 5                    | 5              | 12.1                  | 660    | 74424  | 8.2 | Acyl-coenzyme A oxidase 1, peroxisomal                                                                                                                                                                                                     |
| 1715 | Q15067-2         | 5                    | 5              | 12.1                  | 660    | 74668  | 7.6 | Isoform 2 of Q15067                                                                                                                                                                                                                        |
| 1715 | Q7Z3W5           | 5                    | 5              | 12                    | 666    | 75286  | 7.6 | Hypothetical protein DKFZp686L1882                                                                                                                                                                                                         |
| 1716 | P20839-2         | 5                    | 8              | 14.7                  | 489    | 52598  | 6.6 | Isoform 2 of P20839                                                                                                                                                                                                                        |
| 1716 | P20839           | 5                    | 8              | 14                    | 514    | 55406  | 6.9 | Inosine-5'-monophosphate dehydrogenase 1                                                                                                                                                                                                   |
| 1716 | UPI0000D61CCC    | 5                    | 8              | 13.6                  | 528    | 56788  | 7.1 | Inosine-5'-monophosphate dehydrogenase 1 (EC 1.1.1.205) (IMP dehydrogenase 1) (IMPDH-I) (IMPD 1).                                                                                                                                          |
| 1716 | Q6ZNB1           | 5                    | 8              | 13.6                  | 530    | 57050  | 7.3 | CDNA FLJ16255 fis, clone HLUNG2015548, highly similar to INOSINE-5'- MONOPHOSPHATE DEHYDROGENASE 1                                                                                                                                         |
| 1716 | UPI0000D61CCB    | 5                    | 8              | 12.8                  | 561    | 60210  | 6.6 | Inosine-5'-monophosphate dehydrogenase 1 (EC 1.1.1.205) (IMP dehydrogenase 1) (IMPDH-I) (IMPD 1).                                                                                                                                          |
| 1716 | UPI0000D61CCD    | 5                    | 8              | 12.3                  | 587    | 63025  | 6.7 | Inosine-5'-monophosphate dehydrogenase 1 (EC 1.1.1.205) (IMP dehydrogenase 1) (IMPDH-I) (IMPD 1).                                                                                                                                          |
| 1716 | UPI0000D61CCA    | 5                    | 8              | 12.1                  | 597    | 64093  | 6.9 | Inosine-5'-monophosphate dehydrogenase 1 (EC 1.1.1.205) (IMP dehydrogenase 1) (IMPDH-I) (IMPD 1).                                                                                                                                          |
| 1716 | A4D0Z6           | 5                    | 8              | 12                    | 599    | 64320  | 7   | IMP (Inosine monophosphate) dehydrogenase 1                                                                                                                                                                                                |
| 1716 | Q5H9Q6           | 5                    | 8              | 12                    | 599    | 64537  | 8   | Hypothetical protein DKFZp781N0678                                                                                                                                                                                                         |
| 1717 | Q16843           | 5                    | 21             | 13.9                  | 460    | 52444  | 6.5 | Thromboxane synthase                                                                                                                                                                                                                       |
| 1717 | P24557           | 5                    | 21             | 12                    | 533    | 60544  | 7.6 | Thromboxane-A synthase                                                                                                                                                                                                                     |
| 1717 | UPI000006DC94    | 5                    | 21             | 12                    | 534    | 60676  | 7.6 | thromboxane A synthase 1 (platelet, cytochrome P450, family 5, subfamily A) isoform TXS-I                                                                                                                                                  |
| 1717 | Q53F23           | 5                    | 21             | 12                    | 534    | 60650  | 7.6 | Thromboxane A synthase 1 (Platelet, cytochrome P450, family 5, subfamily A) isoform TXS-I variant                                                                                                                                          |
| 1718 | Q13098           | 5                    | 8              | 11.9                  | 471    | 53372  | 6.7 | COP9 signalosome complex subunit 1                                                                                                                                                                                                         |
| 1718 | Q13098-2         | 5                    | 8              | 11.8                  | 475    | 53816  | 6.9 | Isoform 2 of Q13098                                                                                                                                                                                                                        |
| 1718 | UPI0000231C2E    | 5                    | 8              | 10.6                  | 527    | 59050  | 6.3 | G protein pathway suppressor 1 isoform 1                                                                                                                                                                                                   |
| 1719 | Q9UHG3           | 5                    | 7              | 11.9                  | 505    | 56640  | 6.2 | Prenylcysteine oxidase precursor                                                                                                                                                                                                           |
| 1719 | UPI000013D518    | 5                    | 7              | 11.9                  | 505    | 56700  | 6.2 | prenylcysteine oxidase 1                                                                                                                                                                                                                   |
| 1720 | Q9UN86-2         | 5                    | 19             | 12.7                  | 449    | 50817  | 5.4 | Isoform B of Q9UN86                                                                                                                                                                                                                        |
| 1720 | Q9UN86           | 5                    | 19             | 11.8                  | 482    | 54121  | 5.6 | Ras GTPase-activating protein-binding protein 2                                                                                                                                                                                            |
| 1721 | P10619           | 5                    | 23             | 11.7                  | 480    | 54466  | 6.6 | Lysosomal protective protein precursor (EC 3.4.16.5) (Cathepsin A) (Carboxypeptidase C) (Protective protein for beta-galactosidase) [Contains: Lysosomal protective protein 32 kDa chain; Lysosomal protective protein 20 kDa chain]       |
| 1721 | Q59EV6           | 5                    | 23             | 11.3                  | 497    | 56120  | 6.6 | Carrier family 6 , member 8 variant                                                                                                                                                                                                        |
| 1722 | Q59H57           | 5                    | 29             | 20.3                  | 300    | 31994  | 9.5 | Fusion (Involved in t(12;16) in malignant liposarcoma) isoform a variant                                                                                                                                                                   |
| 1722 | P35637           | 5                    | 29             | 11.6                  | 526    | 53426  | 9.4 | RNA-binding protein FUS                                                                                                                                                                                                                    |
| 1722 | Q8TBR3           | 5                    | 29             | 11.6                  | 526    | 53400  | 9.4 | Fusion (Involved in t(12;16) in malignant liposarcoma)                                                                                                                                                                                     |
| 1722 | Q13344           | 5                    | 29             | 11.6                  | 528    | 53377  | 9.4 | Fus-like protein                                                                                                                                                                                                                           |
| 1722 | P35637-2         | 5                    | 29             | 11.6                  | 525    | 53355  | 9.4 | Isoform Short of P35637                                                                                                                                                                                                                    |
| 1723 | Q9Y3B3           | 5                    | 18             | 21                    | 224    | 25172  | 6.9 | Transmembrane emp24 domain-containing protein 7 precursor                                                                                                                                                                                  |
| 1723 | Q6JUT2           | 5                    | 18             | 11.6                  | 404    | 46173  | 5.1 | Toll-like receptor adapter molecule 2                                                                                                                                                                                                      |
| 1724 | A4D118           | 5                    | 14             | 11.4                  | 561    | 64400  | 6.8 | Asparagine synthetase                                                                                                                                                                                                                      |
| 1724 | P08243           | 5                    | 14             | 11.4                  | 561    | 64370  | 6.9 | Asparagine synthetase [glutamine-hydrolyzing]                                                                                                                                                                                              |
| 1725 | UPI0000D61DD0    | 5                    | 16             | 11.9                  | 1005   | 117261 | 8   | Probable global transcription activator SNF2L1 (EC 3.6.1.-) (Nucleosome remodeling factor subunit SNF2L) (ATP-dependent helicase SMARCA1) (SWI/SNF-related matrix-associated actin-dependent regulator of chromatin subfamily A member 1). |
| 1725 | Q5JZ57           | 5                    | 16             | 11.9                  | 1005   | 117265 | 7.8 | SWI/SNF related, matrix associated, actin dependent regulator of chromatin, subfamily a, member 1                                                                                                                                          |
| 1725 | P28370           | 5                    | 16             | 11.4                  | 1054   | 122605 | 8.1 | Probable global transcription activator SNF2L1                                                                                                                                                                                             |
| 1726 | P63151           | 5                    | 11             | 11.4                  | 447    | 51692  | 6.2 | Serine/threonine-protein phosphatase 2A 55 kDa regulatory subunit B alpha isoform                                                                                                                                                          |
| 1726 | Q56VW8           | 5                    | 11             | 11.4                  | 447    | 51648  | 6.2 | Lung cancer-related protein 9                                                                                                                                                                                                              |
| 1727 | Q92879-2         | 5                    | 11             | 12.9                  | 482    | 51546  | 8.5 | Isoform 2 of Q92879                                                                                                                                                                                                                        |
| 1727 | Q92879-3         | 5                    | 11             | 12.8                  | 483    | 51617  | 8.5 | Isoform 3 of Q92879                                                                                                                                                                                                                        |
| 1727 | Q92879           | 5                    | 11             | 12.8                  | 486    | 52063  | 8.5 | CUG triplet repeat RNA-binding protein 1                                                                                                                                                                                                   |
| 1727 | Q4LE52           | 5                    | 11             | 11.4                  | 544    | 58344  | 7.8 | CUGBP1 variant protein                                                                                                                                                                                                                     |
| 1728 | Q9BQ39           | 5                    | 9              | 11.4                  | 737    | 82565  | 9.2 | ATP-dependent RNA helicase DDX50                                                                                                                                                                                                           |
| 1729 | Q01650           | 5                    | 65             | 11.2                  | 507    | 55010  | 7.7 | Large neutral amino acids transporter small subunit 1                                                                                                                                                                                      |
| 1730 | Q8NF37           | 5                    | 25             | 11.2                  | 534    | 59151  | 6   | 1-acylglycerophosphocholine O-acyltransferase 1                                                                                                                                                                                            |
| 1731 | Q9HCC0-2         | 5                    | 9              | 12                    | 525    | 57519  | 7.7 | Isoform 2 of Q9HCC0                                                                                                                                                                                                                        |

| No.  | Accession Number | Unique Peptide Count | Spectrum Count | Sequence Coverage (%) | Length | MolWt  | pI  | Descriptive Name                                                                                                                                                                                                                  |
|------|------------------|----------------------|----------------|-----------------------|--------|--------|-----|-----------------------------------------------------------------------------------------------------------------------------------------------------------------------------------------------------------------------------------|
| 1731 | Q9HCC0           | 5                    | 9              | 11.2                  | 563    | 61333  | 7.7 | Methylcrotonoyl-CoA carboxylase beta chain, mitochondrial precursor                                                                                                                                                               |
| 1732 | Q8TF42           | 5                    | 6              | 11.1                  | 649    | 72696  | 6.9 | Suppressor of T-cell receptor signaling 1                                                                                                                                                                                         |
| 1733 | Q96G03           | 5                    | 9              | 11.1                  | 612    | 68283  | 6.7 | Phosphoglucomutase-2                                                                                                                                                                                                              |
| 1734 | P00390           | 5                    | 19             | 10.5                  | 522    | 56257  | 8.5 | Glutathione reductase, mitochondrial precursor                                                                                                                                                                                    |
| 1735 | P48637           | 5                    | 11             | 10.5                  | 474    | 52385  | 5.9 | Glutathione synthetase                                                                                                                                                                                                            |
| 1736 | Q12929           | 5                    | 11             | 10.5                  | 822    | 91882  | 7.5 | Epidermal growth factor receptor kinase substrate 8                                                                                                                                                                               |
| 1736 | UPI000013DC63    | 5                    | 11             | 10.4                  | 824    | 92040  | 7.5 | Epidermal growth factor receptor kinase substrate 8.                                                                                                                                                                              |
| 1737 | Q43823           | 5                    | 6              | 10.3                  | 692    | 76108  | 5.1 | A-kinase anchor protein 8                                                                                                                                                                                                         |
| 1738 | Q6DEN2           | 5                    | 6              | 9.8                   | 684    | 73910  | 6.6 | DPYSL3 protein                                                                                                                                                                                                                    |
| 1738 | UPI000020CF0E    | 5                    | 6              | 9.8                   | 684    | 73911  | 6.4 | Dihydropyrimidinase-related protein 3 (DRP-3) (Unc-33-like phosphoprotein) (ULIP protein) (Collapsin response mediator protein 4) (CRMP-4).                                                                                       |
| 1739 | Q14258           | 5                    | 13             | 9.7                   | 630    | 70990  | 8.1 | Tripartite motif-containing protein 25                                                                                                                                                                                            |
| 1739 | UPI00001AE6B8    | 5                    | 13             | 9.7                   | 630    | 70974  | 8.1 | tripartite motif-containing 25                                                                                                                                                                                                    |
| 1739 | Q59GW5           | 5                    | 13             | 9.5                   | 644    | 72250  | 8.1 | Tripartite motif-containing 25 variant                                                                                                                                                                                            |
| 1740 | Q9BR76           | 5                    | 10             | 9.6                   | 489    | 54235  | 5.9 | Coronin-1B                                                                                                                                                                                                                        |
| 1741 | Q13586           | 5                    | 6              | 9.2                   | 685    | 77493  | 6.7 | Stromal interaction molecule 1 precursor                                                                                                                                                                                          |
| 1741 | Q8N382           | 5                    | 6              | 9.2                   | 685    | 77423  | 6.7 | Stromal interaction molecule 1                                                                                                                                                                                                    |
| 1742 | Q8NG18           | 5                    | 5              | 9.2                   | 554    | 63522  | 5.1 | Chronic myelogenous leukemia tumor antigen 66 short form                                                                                                                                                                          |
| 1742 | UPI000021048A    | 5                    | 5              | 8.7                   | 583    | 66756  | 5.1 | NudC domain containing 1                                                                                                                                                                                                          |
| 1742 | Q9BVR5           | 5                    | 5              | 8.7                   | 583    | 66790  | 5.1 | NudC domain containing 1                                                                                                                                                                                                          |
| 1742 | Q96SI4           | 5                    | 5              | 8.7                   | 583    | 66729  | 5.1 | CDNA FLJ14991 fis, clone Y79AA1001781                                                                                                                                                                                             |
| 1742 | Q96RS6           | 5                    | 5              | 8.7                   | 583    | 66776  | 5.1 | NudC domain-containing protein 1                                                                                                                                                                                                  |
| 1743 | Q8IVL6           | 5                    | 11             | 9.1                   | 736    | 81837  | 6.3 | Prolyl 3-hydroxylase 3 precursor                                                                                                                                                                                                  |
| 1743 | UPI00001AF55A    | 5                    | 11             | 9.1                   | 735    | 81723  | 6.3 | Probable G-protein coupled receptor 162 (Gene-rich cluster gene A protein).                                                                                                                                                       |
| 1744 | P30825           | 5                    | 34             | 8.6                   | 629    | 67638  | 5.4 | High-affinity cationic amino acid transporter 1                                                                                                                                                                                   |
| 1745 | Q15397           | 5                    | 13             | 8.6                   | 648    | 73584  | 9.6 | Protein KIAA0020                                                                                                                                                                                                                  |
| 1746 | Q14978           | 5                    | 18             | 8.4                   | 699    | 73603  | 9.5 | Nucleolar phosphoprotein p130                                                                                                                                                                                                     |
| 1746 | UPI00001303C3    | 5                    | 18             | 8.4                   | 699    | 73720  | 9.5 | nucleolar and coiled-body phosphoprotein 1                                                                                                                                                                                        |
| 1746 | Q9BUV3           | 5                    | 18             | 8.4                   | 700    | 73745  | 9.5 | Nucleolar and coiled-body phosphoprotein 1                                                                                                                                                                                        |
| 1746 | Q14978-2         | 5                    | 18             | 8.3                   | 709    | 74747  | 9.5 | Isoform Beta of Q14978                                                                                                                                                                                                            |
| 1747 | Q15061           | 5                    | 15             | 8.3                   | 720    | 79119  | 5.9 | WD repeat protein 43                                                                                                                                                                                                              |
| 1748 | Q96EY7           | 5                    | 6              | 8.3                   | 689    | 78550  | 6.4 | Pentatricopeptide repeat domain-containing protein 3                                                                                                                                                                              |
| 1748 | UPI0000456DED    | 5                    | 6              | 8.3                   | 690    | 78624  | 6.4 | Pentatricopeptide repeat domain 3                                                                                                                                                                                                 |
| 1749 | Q9H078-2         | 5                    | 6              | 8.7                   | 677    | 75449  | 9   | Isoform 2 of Q9H078                                                                                                                                                                                                               |
| 1749 | Q9H078           | 5                    | 6              | 8.3                   | 707    | 78729  | 9   | Caseinolytic peptidase B protein homolog                                                                                                                                                                                          |
| 1750 | Q9Y2W2           | 5                    | 9              | 8.3                   | 641    | 69998  | 8.4 | WW domain-binding protein 11                                                                                                                                                                                                      |
| 1751 | Q95352           | 5                    | 12             | 8.1                   | 703    | 77960  | 6.2 | Autophagy-related protein 7                                                                                                                                                                                                       |
| 1752 | Q96ST2           | 5                    | 9              | 7.9                   | 819    | 91955  | 4.7 | IWS1 homolog                                                                                                                                                                                                                      |
| 1753 | Q9Y5S1           | 5                    | 17             | 7.9                   | 764    | 85981  | 5.8 | Transient receptor potential cation channel subfamily V member 2                                                                                                                                                                  |
| 1753 | UPI0000D622C9    | 5                    | 17             | 7.8                   | 766    | 86151  | 5.9 | Transient receptor potential cation channel subfamily V member 2 (TrpV2) (osm-9-like TRP channel 2) (OTRPC2) (Vanilloid receptor-like protein 1) (VRL-1).                                                                         |
| 1754 | Q94776           | 5                    | 10             | 7.8                   | 668    | 75023  | 9.7 | Metastasis-associated protein MTA2                                                                                                                                                                                                |
| 1755 | O60341           | 5                    | 5              | 7.7                   | 852    | 92903  | 6.5 | Lysine-specific histone demethylase 1                                                                                                                                                                                             |
| 1755 | UPI0000D61E80    | 5                    | 5              | 7.5                   | 876    | 95223  | 6.2 | Lysine-specific histone demethylase 1 (EC 1.-.-.) (Flavin-containing amine oxidase domain-containing protein 2) (BRAF35-HDAC complex protein BHC110).                                                                             |
| 1755 | O60341-2         | 5                    | 5              | 7.5                   | 876    | 95155  | 6.2 | Isoform 2 of O60341                                                                                                                                                                                                               |
| 1756 | O75150           | 5                    | 8              | 7.7                   | 1001   | 113678 | 6.3 | E3 ubiquitin-protein ligase BRE1B                                                                                                                                                                                                 |
| 1756 | UPI000013D2CF    | 5                    | 8              | 7.7                   | 1001   | 113650 | 6.2 | Ubiquitin-protein ligase BRE1B (EC 6.3.2.-) (BRE1-B) (RING finger protein 40) (95 kDa retinoblastoma-associated protein) (RBP95).                                                                                                 |
| 1757 | Q9Y4K0           | 5                    | 8              | 7.6                   | 774    | 86725  | 6.4 | Lysyl oxidase homolog 2 precursor                                                                                                                                                                                                 |
| 1757 | UPI00001AE795    | 5                    | 8              | 7.6                   | 777    | 87020  | 6.4 | Lysyl oxidase homolog 2 precursor (EC 1.4.3.-) (Lysyl oxidase-like protein 2) (Lysyl oxidase-related protein 2) (Lysyl oxidase-related protein WS9-14).                                                                           |
| 1758 | Q5JTZ4           | 5                    | 9              | 7.5                   | 949    | 104235 | 5.1 | A kinase (PRKA) anchor protein 2                                                                                                                                                                                                  |
| 1758 | UPI000002A38A    | 5                    | 9              | 6.5                   | 1090   | 120630 | 5   | PALM2-AKAP2 protein isoform 2                                                                                                                                                                                                     |
| 1759 | Q9H307           | 5                    | 17             | 7.4                   | 717    | 81614  | 7.2 | Pinin                                                                                                                                                                                                                             |
| 1759 | UPI000013C70D    | 5                    | 17             | 7.4                   | 717    | 81628  | 7.2 | Pinin (140 kDa nuclear and cell adhesion-related phosphoprotein) (Domain-rich serine protein) (DRS-protein) (DRSP) (Melanoma metastasis clone A protein) (Desmosome-associated protein) (SR-like protein) (Nuclear protein SDK3). |
| 1760 | Q9NZ08           | 5                    | 10             | 7.3                   | 929    | 105847 | 6.4 | Adipocyte-derived leucine aminopeptidase precursor                                                                                                                                                                                |
| 1760 | Q9NZ08-2         | 5                    | 10             | 7.3                   | 936    | 106453 | 6.2 | Isoform 2 of Q9NZ08                                                                                                                                                                                                               |
| 1760 | UPI0000041388    | 5                    | 10             | 7.2                   | 941    | 107235 | 6.5 | type 1 tumor necrosis factor receptor shedding aminopeptidase regulator isoform b                                                                                                                                                 |
| 1761 | Q2M2I8           | 5                    | 7              | 7.2                   | 863    | 93578  | 8.5 | AP2-associated protein kinase 1                                                                                                                                                                                                   |



| No.  | Accession Number | Unique Peptide Count | Spectrum Count | Sequence Coverage (%) | Length | MolWt  | pI  | Descriptive Name                                                                                                                                                                                                                                                                                                                                   |
|------|------------------|----------------------|----------------|-----------------------|--------|--------|-----|----------------------------------------------------------------------------------------------------------------------------------------------------------------------------------------------------------------------------------------------------------------------------------------------------------------------------------------------------|
| 1762 | Q99805           | 5                    | 19             | 6.8                   | 663    | 75776  | 7.4 | Transmembrane 9 superfamily protein member 2 precursor                                                                                                                                                                                                                                                                                             |
| 1763 | Q9UPN7           | 5                    | 6              | 6.7                   | 881    | 96724  | 4.6 | SAPS domain family member 1                                                                                                                                                                                                                                                                                                                        |
| 1763 | UPI0000D61817    | 5                    | 6              | 6.7                   | 880    | 96637  | 4.6 | SAPS domain family member 1.                                                                                                                                                                                                                                                                                                                       |
| 1763 | UPI000046D380    | 5                    | 6              | 6.6                   | 891    | 97792  | 4.6 | SAPS domain family, member 1                                                                                                                                                                                                                                                                                                                       |
| 1764 | O95479           | 5                    | 5              | 6.6                   | 791    | 88893  | 7.3 | GDH/6PGL endoplasmic bifunctional protein precursor [Includes: Glucose 1-dehydrogenase (EC 1.1.1.47) (Hexose-6-phosphate dehydrogenase); 6-phosphogluconolactonase (EC 3.1.1.31) (6PGL)]                                                                                                                                                           |
| 1765 | UPI00003672DD    | 5                    | 8              | 9.2                   | 552    | 58818  | 6   | Disabled homolog 2 (Differentially expressed protein 2) (DOC-2).                                                                                                                                                                                                                                                                                   |
| 1765 | P98082-2         | 5                    | 8              | 9.2                   | 552    | 58861  | 5.7 | Isoform 2 of P98082                                                                                                                                                                                                                                                                                                                                |
| 1765 | P98082           | 5                    | 8              | 6.6                   | 770    | 82448  | 5.5 | Disabled homolog 2                                                                                                                                                                                                                                                                                                                                 |
| 1765 | UPI0000161C97    | 5                    | 8              | 6.6                   | 770    | 82588  | 5.7 | disabled homolog 2                                                                                                                                                                                                                                                                                                                                 |
| 1765 | UPI000013DD18    | 5                    | 8              | 6.6                   | 770    | 82405  | 5.7 | Disabled homolog 2 (Differentially expressed protein 2) (DOC-2).                                                                                                                                                                                                                                                                                   |
| 1766 | Q8IWA0           | 5                    | 8              | 6.6                   | 830    | 94499  | 6   | WD repeat protein 75                                                                                                                                                                                                                                                                                                                               |
| 1767 | Q14739           | 5                    | 20             | 6.5                   | 615    | 70703  | 9.4 | Lamin-B receptor                                                                                                                                                                                                                                                                                                                                   |
| 1768 | O60502           | 5                    | 6              | 6.4                   | 916    | 102915 | 4.9 | Bifunctional protein NCOAT (Nuclear cytoplasmic O-GlcNAcase and acetyltransferase) (Meningioma-expressed antigen 5) [Includes: Beta-hexosaminidase (EC 3.2.1.52) (N-acetyl-beta-glucosaminidase) (Beta-N- acetylhexosaminidase) (Hexosaminidase C) (N-acetyl-beta-D-glucosaminidase) (O-GlcNAcase); Histone acetyltransferase (EC 2.3.1.48) (HAT)] |
| 1769 | P23786           | 5                    | 5              | 6.4                   | 658    | 73777  | 8.2 | Carnitine O-palmitoyltransferase 2, mitochondrial precursor                                                                                                                                                                                                                                                                                        |
| 1770 | Q53EP0           | 5                    | 13             | 6                     | 1204   | 132878 | 5.9 | Fibronectin type III domain-containing protein 3B                                                                                                                                                                                                                                                                                                  |
| 1770 | UPI00001AE8B2    | 5                    | 13             | 6                     | 1204   | 132888 | 5.9 | fibronectin type III domain containing 3B                                                                                                                                                                                                                                                                                                          |
| 1770 | Q8IXB2           | 5                    | 13             | 6                     | 1204   | 132900 | 5.9 | FAD104                                                                                                                                                                                                                                                                                                                                             |
| 1770 | Q5U5T8           | 5                    | 13             | 6                     | 1204   | 132957 | 5.9 | Fibronectin type III domain containing 3B                                                                                                                                                                                                                                                                                                          |
| 1771 | Q9HC35           | 5                    | 7              | 5.8                   | 981    | 108903 | 6.3 | Echinoderm microtubule-associated protein-like 4                                                                                                                                                                                                                                                                                                   |
| 1771 | UPI0000140350    | 5                    | 7              | 5.8                   | 981    | 108916 | 6.4 | Echinoderm microtubule-associated protein-like 4 (EMAP-4) (Restrictedly overexpressed proliferation-associated protein) (Ropp 120).                                                                                                                                                                                                                |
| 1772 | UPI000045664D    | 5                    | 10             | 5.8                   | 993    | 110953 | 5.4 | Protein phosphatase 1 regulatory subunit 12A (Myosin phosphatase- targeting subunit 1) (Myosin phosphatase target subunit 1) (Protein phosphatase myosin-binding subunit).                                                                                                                                                                         |
| 1772 | O14974-2         | 5                    | 10             | 5.8                   | 995    | 111185 | 5.4 | Isoform 2 of O14974                                                                                                                                                                                                                                                                                                                                |
| 1772 | O14974           | 5                    | 10             | 5.6                   | 1030   | 115281 | 5.4 | Protein phosphatase 1 regulatory subunit 12A                                                                                                                                                                                                                                                                                                       |
| 1772 | UPI000045664E    | 5                    | 10             | 5.6                   | 1028   | 115048 | 5.4 | Protein phosphatase 1 regulatory subunit 12A (Myosin phosphatase- targeting subunit 1) (Myosin phosphatase target subunit 1) (Protein phosphatase myosin-binding subunit).                                                                                                                                                                         |
| 1772 | Q2NKL4           | 5                    | 10             | 5.6                   | 1030   | 115281 | 5.4 | PPP1R12A protein                                                                                                                                                                                                                                                                                                                                   |
| 1773 | P56199           | 5                    | 12             | 5.3                   | 1179   | 130848 | 6.3 | Integrin alpha-1 precursor                                                                                                                                                                                                                                                                                                                         |
| 1773 | UPI0000D61624    | 5                    | 12             | 5.3                   | 1180   | 130988 | 6.3 | Integrin alpha-1 precursor (Laminin and collagen receptor) (VLA-1) (CD49a antigen).                                                                                                                                                                                                                                                                |
| 1774 | Q15386           | 5                    | 7              | 5.1                   | 1083   | 123923 | 6.7 | Ubiquitin-protein ligase E3C                                                                                                                                                                                                                                                                                                                       |
| 1774 | UPI000013D26C    | 5                    | 7              | 5.1                   | 1085   | 124150 | 6.7 | Ubiquitin-protein ligase E3C (EC 6.3.2.-).                                                                                                                                                                                                                                                                                                         |
| 1774 | UPI0000071402    | 5                    | 7              | 5.1                   | 1083   | 123937 | 6.7 | ubiquitin protein ligase E3C                                                                                                                                                                                                                                                                                                                       |
| 1775 | Q59HA5           | 5                    | 8              | 5.4                   | 1196   | 130790 | 5.8 | Cyclin G-associated kinase variant                                                                                                                                                                                                                                                                                                                 |
| 1775 | Q5U4P5           | 5                    | 8              | 5.3                   | 1232   | 134410 | 5.8 | GAK protein                                                                                                                                                                                                                                                                                                                                        |
| 1775 | O14976           | 5                    | 8              | 5                     | 1311   | 143190 | 5.7 | Cyclin G-associated kinase                                                                                                                                                                                                                                                                                                                         |
| 1775 | UPI0000161B7C    | 5                    | 8              | 5                     | 1311   | 143164 | 5.7 | cyclin G associated kinase                                                                                                                                                                                                                                                                                                                         |
| 1776 | Q8NFA7           | 5                    | 6              | 5.5                   | 940    | 103581 | 7.1 | Transmembrane receptor PTK7-3                                                                                                                                                                                                                                                                                                                      |
| 1776 | UPI0000457445    | 5                    | 6              | 5.1                   | 1015   | 112354 | 6.9 | Tyrosine-protein kinase-like 7 precursor (Colon carcinoma kinase 4) (CCK-4).                                                                                                                                                                                                                                                                       |
| 1776 | Q8NFA6           | 5                    | 6              | 5.1                   | 1014   | 112261 | 7   | Transmembrane receptor PTK7-4                                                                                                                                                                                                                                                                                                                      |
| 1776 | Q8NFA8           | 5                    | 6              | 5                     | 1030   | 113805 | 7   | Transmembrane receptor PTK7-2                                                                                                                                                                                                                                                                                                                      |
| 1776 | Q13308           | 5                    | 6              | 4.9                   | 1070   | 118392 | 7.1 | Tyrosine-protein kinase-like 7 precursor                                                                                                                                                                                                                                                                                                           |
| 1776 | Q6IQ54           | 5                    | 6              | 4.9                   | 1070   | 118376 | 7.1 | PTK7 protein tyrosine kinase 7                                                                                                                                                                                                                                                                                                                     |
| 1777 | Q16706           | 5                    | 21             | 4.9                   | 1144   | 131084 | 7.6 | Alpha-mannosidase 2                                                                                                                                                                                                                                                                                                                                |
| 1777 | UPI000013D193    | 5                    | 21             | 4.9                   | 1144   | 131140 | 7.6 | mannosidase, alpha, class 2A, member 1                                                                                                                                                                                                                                                                                                             |
| 1778 | Q08AD0           | 5                    | 7              | 4.8                   | 1516   | 174700 | 6.9 | UDP-glucose ceramide glucosyltransferase-like 2                                                                                                                                                                                                                                                                                                    |
| 1778 | UPI00001FC9AA    | 5                    | 7              | 4.8                   | 1516   | 174734 | 6.9 | UDP-glucose:glycoprotein glucosyltransferase 2 precursor (EC 2.4.1.-) (UDP-glucose ceramide glucosyltransferase-like 1) (UDP-- Glc:glycoprotein glucosyltransferase 2) (HUGT2).                                                                                                                                                                    |
| 1778 | UPI0000137AEE    | 5                    | 7              | 4.8                   | 1516   | 174760 | 6.9 | UDP-glucose:glycoprotein glucosyltransferase 2                                                                                                                                                                                                                                                                                                     |
| 1778 | Q9NYU1           | 5                    | 7              | 4.8                   | 1516   | 174718 | 6.9 | UDP-glucose:glycoprotein glucosyltransferase 2 precursor                                                                                                                                                                                                                                                                                           |
| 1779 | O14802           | 5                    | 6              | 4.7                   | 1391   | 155748 | 8.5 | DNA-directed RNA polymerase III largest subunit                                                                                                                                                                                                                                                                                                    |
| 1779 | Q8IW34           | 5                    | 6              | 4.7                   | 1390   | 155641 | 8.5 | DNA-directed RNA polymerase                                                                                                                                                                                                                                                                                                                        |
| 1780 | P19174           | 5                    | 9              | 4.7                   | 1290   | 148532 | 6   | 1-phosphatidylinositol-4,5-bisphosphate phosphodiesterase gamma 1                                                                                                                                                                                                                                                                                  |
| 1780 | A2A284           | 5                    | 9              | 4.6                   | 1291   | 148660 | 6   | Phospholipase C, gamma 1                                                                                                                                                                                                                                                                                                                           |

| No.  | Accession Number | Unique Peptide Count | Spectrum Count | Sequence Coverage (%) | Length | MolWt  | pI  | Descriptive Name                                                                                                                                                                             |
|------|------------------|----------------------|----------------|-----------------------|--------|--------|-----|----------------------------------------------------------------------------------------------------------------------------------------------------------------------------------------------|
| 1780 | UPI0000D61091    | 5                    | 9              | 4.2                   | 1412   | 161314 | 7.2 | 1-phosphatidylinositol-4,5-bisphosphate phosphodiesterase gamma 1 (EC 3.1.4.11) (Phosphoinositide phospholipase C) (PLC-gamma-1) (Phospholipase C-gamma-1) (PLC-II) (PLC-148).               |
| 1780 | Q4LE43           | 5                    | 9              | 4.2                   | 1412   | 161302 | 7.2 | PLCG1 variant protein                                                                                                                                                                        |
| 1781 | Q14692           | 5                    | 7              | 4.6                   | 1282   | 145807 | 6.4 | Ribosome biogenesis protein BMS1 homolog                                                                                                                                                     |
| 1781 | UPI000000DA33    | 5                    | 7              | 4.6                   | 1282   | 145821 | 6.4 | BMS1-like, ribosome assembly protein                                                                                                                                                         |
| 1782 | Q5VT25-3         | 5                    | 10             | 4.8                   | 1638   | 186112 | 6.3 | Isoform 3 of Q5VT25                                                                                                                                                                          |
| 1782 | Q5VT25           | 5                    | 10             | 4.6                   | 1732   | 197306 | 6.6 | Serine/threonine-protein kinase MRCK alpha                                                                                                                                                   |
| 1782 | Q5VT25-5         | 5                    | 10             | 4.6                   | 1719   | 195921 | 6.5 | Isoform 5 of Q5VT25                                                                                                                                                                          |
| 1782 | Q5VT25-2         | 5                    | 10             | 4.5                   | 1754   | 199809 | 6.4 | Isoform 2 of Q5VT25                                                                                                                                                                          |
| 1783 | Q8IZN6           | 5                    | 10             | 3.9                   | 1278   | 144200 | 8.2 | ATP-binding cassette protein C4 splice variant A                                                                                                                                             |
| 1783 | O15439           | 5                    | 10             | 3.8                   | 1325   | 149540 | 8.3 | Multidrug resistance-associated protein 4                                                                                                                                                    |
| 1783 | Q9BX28           | 5                    | 10             | 3.8                   | 1325   | 149526 | 8.2 | ATP-binding cassette, sub-family C (CFTR/MRP), member 4                                                                                                                                      |
| 1783 | Q8NEW8           | 5                    | 10             | 3.8                   | 1325   | 149355 | 8.3 | Multidrug resistance-associated protein                                                                                                                                                      |
| 1784 | Q9C0D5           | 5                    | 6              | 3.8                   | 1644   | 179425 | 8.4 | Tetrapeptide repeat, ankyrin repeat and coiled-coil-containing protein 1                                                                                                                     |
| 1784 | UPI0000D61252    | 5                    | 6              | 3.3                   | 1861   | 202244 | 8.3 | TPR domain, ankyrin-repeat and coiled-coil-containing                                                                                                                                        |
| 1784 | UPI00004B247A    | 5                    | 6              | 3.3                   | 1861   | 202191 | 8.3 | TPR domain, ankyrin-repeat and coiled-coil-containing                                                                                                                                        |
| 1785 | Q4ZG46           | 5                    | 5              | 3.7                   | 1583   | 184656 | 5.1 | Ran-binding protein 2-like 4                                                                                                                                                                 |
| 1785 | Q8IWJ2           | 5                    | 5              | 3.7                   | 1583   | 184657 | 5.1 | GRIP and coiled-coil domain-containing protein 2                                                                                                                                             |
| 1785 | UPI000049DF0C    | 5                    | 5              | 3.4                   | 1684   | 195908 | 5.1 | Ran-binding protein 2-like 4 (RanBP2L4).                                                                                                                                                     |
| 1786 | UPI00001D7C42    | 5                    | 12             | 3.6                   | 1593   | 182774 | 8.4 | THO complex 2 isoform 1                                                                                                                                                                      |
| 1787 | Q8TCU6           | 5                    | 11             | 3.2                   | 1659   | 186203 | 6.4 | Phosphatidylinositol 3,4,5-trisphosphate-dependent Rac exchanger 1 protein                                                                                                                   |
| 1787 | UPI000013D375    | 5                    | 11             | 3.2                   | 1659   | 186202 | 6.4 | Phosphatidylinositol 3,4,5-trisphosphate-dependent Rac exchanger 1 protein (P-Rex1 protein).                                                                                                 |
| 1788 | Q9P2B8           | 5                    | 6              | 3.2                   | 1795   | 200853 | 4.8 | KIAA1429 protein                                                                                                                                                                             |
| 1788 | Q69YN4           | 5                    | 6              | 3.1                   | 1810   | 201700 | 5   | Protein KIAA1429                                                                                                                                                                             |
| 1788 | UPI00001BBB23    | 5                    | 6              | 3.1                   | 1812   | 202023 | 5   | hypothetical protein LOC25962 isoform 1                                                                                                                                                      |
| 1789 | UPI000049DE09    | 5                    | 10             | 3.3                   | 1615   | 182150 | 9.7 | Retinoblastoma-binding protein 6 (p53-associated cellular protein of testis) (Proliferation potential-related protein) (Protein P2P-R) (Retinoblastoma-binding Q protein 1) (Protein RBQ-1). |
| 1789 | Q7Z6E9           | 5                    | 10             | 3                     | 1792   | 201563 | 9.6 | Retinoblastoma-binding protein 6                                                                                                                                                             |
| 1789 | Q7Z6E9-2         | 5                    | 10             | 3                     | 1758   | 197286 | 9.6 | Isoform 2 of Q7Z6E9                                                                                                                                                                          |
| 1790 | Q12789-2         | 5                    | 6              | 2.8                   | 2109   | 238885 | 7.3 | Isoform 2 of Q12789                                                                                                                                                                          |
| 1790 | UPI0000D619C4    | 5                    | 6              | 2.8                   | 2112   | 239270 | 7.4 | General transcription factor 3C polypeptide 1 (Transcription factor IIIC-subunit alpha) (TF3C-alpha) (TFIIIC 220 kDa subunit) (TFIIIC220) (TFIIIC box B-binding subunit).                    |
| 1790 | UPI00001FF123    | 5                    | 6              | 2.8                   | 2109   | 238873 | 7.3 | general transcription factor IIIC, polypeptide 1, alpha 220kDa                                                                                                                               |
| 1790 | Q6AHZ7           | 5                    | 6              | 2.8                   | 2109   | 238799 | 7.4 | Hypothetical protein DKFZp686A111                                                                                                                                                            |
| 1791 | Q9H2D6-5         | 5                    | 5              | 10.6                  | 593    | 68041  | 6.1 | Isoform 1 of Q9H2D6                                                                                                                                                                          |
| 1791 | Q9H2D6-2         | 5                    | 5              | 2.8                   | 2267   | 250721 | 8.2 | Isoform 3 of Q9H2D6                                                                                                                                                                          |
| 1791 | Q9H2D6           | 5                    | 5              | 2.7                   | 2365   | 261373 | 8.5 | TRIO and F-actin-binding protein                                                                                                                                                             |
| 1792 | UPI00001FF2F6    | 5                    | 15             | 2.4                   | 2376   | 266937 | 7.1 | CCR4-NOT transcription complex, subunit 1 isoform a                                                                                                                                          |
| 1793 | UPI0000366852    | 5                    | 21             | 2.5                   | 2136   | 225686 | 6.4 | Serine/threonine-protein kinase WNK1 (EC 2.7.11.1) (Protein kinase with no lysine 1) (Protein kinase, lysine-deficient 1) (Kinase deficient protein) (Erythrocyte 65 kDa protein) (p65).     |
| 1793 | Q9H4A3-2         | 5                    | 21             | 2.5                   | 2136   | 225648 | 6.4 | Isoform 2 of Q9H4A3                                                                                                                                                                          |
| 1793 | Q9H4A3           | 5                    | 21             | 2.2                   | 2382   | 250753 | 6.3 | Serine/threonine-protein kinase WNK1                                                                                                                                                         |
| 1793 | UPI000013CD65    | 5                    | 21             | 2.2                   | 2382   | 250791 | 6.3 | Serine/threonine-protein kinase WNK1 (EC 2.7.11.1) (Protein kinase with no lysine 1) (Protein kinase, lysine-deficient 1) (Kinase deficient protein) (Erythrocyte 65 kDa protein) (p65).     |
| 1794 | Q6IEH8           | 5                    | 16             | 2                     | 2804   | 316066 | 7.9 | Transcriptional regulator                                                                                                                                                                    |
| 1794 | Q6KC79           | 5                    | 16             | 2                     | 2804   | 316051 | 7.9 | Nipped-B-like protein                                                                                                                                                                        |
| 1795 | Q03001-6         | 5                    | 5              | 1.8                   | 2586   | 301815 | 6.7 | Isoform 8 of Q03001                                                                                                                                                                          |
| 1795 | UPI0000D6147A    | 5                    | 5              | 1.6                   | 3031   | 351796 | 6.3 | Bullous pemphigoid antigen 1, isoforms 1/2/3/4/5/8 (230 kDa bullous pemphigoid antigen) (BPA) (Hemidesmosomal plaque protein) (Dystonia musculorum protein) (Dystonin)                       |
| 1795 | Q03001-5         | 5                    | 5              | 1.6                   | 2950   | 342758 | 6.8 | Isoform 5 of Q03001                                                                                                                                                                          |
| 1795 | Q03001-2         | 5                    | 5              | 1.6                   | 3030   | 351839 | 6.3 | Isoform 2 of Q03001                                                                                                                                                                          |
| 1795 | Q03001           | 5                    | 5              | 1.5                   | 3214   | 372210 | 6.8 | Bullous pemphigoid antigen 1, isoforms 1/2/3/4/5/8                                                                                                                                           |
| 1795 | UPI0000D61479    | 5                    | 5              | 1.5                   | 3212   | 371786 | 6.8 | Bullous pemphigoid antigen 1, isoforms 1/2/3/4/5/8 (230 kDa bullous pemphigoid antigen) (BPA) (Hemidesmosomal plaque protein) (Dystonia musculorum protein) (Dystonin)                       |
| 1796 | P56385           | 4                    | 11             | 62.3                  | 69     | 7933   | 9.4 | ATP synthase e chain, mitochondrial                                                                                                                                                          |
| 1797 | Q13885           | 4                    | 12             | 61.3                  | 445    | 49907  | 4.9 | Tubulin beta-2A chain                                                                                                                                                                        |
| 1798 | Q96FJ2           | 4                    | 19             | 57.3                  | 89     | 10350  | 7.4 | Dynein light chain 2, cytoplasmic                                                                                                                                                            |

| No.  | Accession Number | Unique Peptide Count | Spectrum Count | Sequence Coverage (%) | Length | MolWt | pI   | Descriptive Name                                                           |
|------|------------------|----------------------|----------------|-----------------------|--------|-------|------|----------------------------------------------------------------------------|
| 1799 | P04080           | 4                    | 21             | 55.1                  | 98     | 11140 | 7.6  | Cystatin-B                                                                 |
| 1800 | P62140           | 4                    | 18             | 54.1                  | 327    | 37187 | 6.2  | Serine/threonine-protein phosphatase PP1-beta catalytic subunit            |
| 1801 | Q9NS69           | 4                    | 33             | 50.7                  | 142    | 15522 | 4.3  | Mitochondrial import receptor subunit TOM22 homolog                        |
| 1802 | Q9Y3D0           | 4                    | 8              | 50.3                  | 163    | 17663 | 5.2  | Protein FAM96B                                                             |
| 1803 | Q9BT73           | 4                    | 6              | 50                    | 122    | 13104 | 7.9  | Uncharacterized protein C7orf48                                            |
| 1804 | Q6FIG4           | 4                    | 27             | 49.3                  | 201    | 22198 | 5.7  | RAB1B protein                                                              |
| 1804 | Q9H0U4           | 4                    | 27             | 49.3                  | 201    | 22171 | 5.7  | Ras-related protein Rab-1B                                                 |
| 1805 | O00483           | 4                    | 21             | 46.9                  | 81     | 9370  | 9.4  | NADH dehydrogenase [ubiquinone] 1 alpha subcomplex subunit 4               |
| 1806 | O96033           | 4                    | 9              | 46.6                  | 88     | 9755  | 4.7  | Molybdenum cofactor synthesis protein 2 small subunit                      |
| 1807 | P14209           | 4                    | 23             | 45.4                  | 185    | 18848 | 4.7  | CD99 antigen precursor                                                     |
| 1808 | P52434           | 4                    | 9              | 44.7                  | 150    | 17143 | 4.7  | DNA-directed RNA polymerases I, II, and III 17.1 kDa polypeptide           |
| 1809 | Q96FQ6           | 4                    | 43             | 44.7                  | 103    | 11801 | 6.8  | Protein S100-A16                                                           |
| 1810 | Q5JW33           | 4                    | 10             | 44                    | 134    | 15055 | 4.6  | ASF1 anti-silencing function 1 homolog A                                   |
| 1810 | UPI00004153B3    | 4                    | 10             | 35.1                  | 168    | 18809 | 4.5  | ASF1 anti-silencing function 1 homolog A                                   |
| 1810 | Q9Y294           | 4                    | 10             | 28.9                  | 204    | 22969 | 4.4  | Histone chaperone ASF1A                                                    |
| 1811 | A4FU11           | 4                    | 11             | 43.9                  | 262    | 29294 | 10.2 | RPS4Y1 protein                                                             |
| 1811 | Q496E4           | 4                    | 11             | 43.7                  | 263    | 29426 | 10.2 | Ribosomal protein S4, Y-linked 1                                           |
| 1811 | P22090           | 4                    | 11             | 43.7                  | 263    | 29456 | 10.2 | 40S ribosomal protein S4, Y isoform 1                                      |
| 1812 | P62312           | 4                    | 10             | 43.8                  | 80     | 9128  | 9.6  | U6 snRNA-associated Sm-like protein LSm6                                   |
| 1813 | P31949           | 4                    | 48             | 42.9                  | 105    | 11740 | 7.2  | Protein S100-A11                                                           |
| 1814 | Q16864           | 4                    | 7              | 42.9                  | 119    | 13370 | 5.5  | Vacuolar ATP synthase subunit F                                            |
| 1815 | P82909           | 4                    | 5              | 42.7                  | 103    | 11466 | 10   | Mitochondrial 28S ribosomal protein S36                                    |
| 1816 | A0JKD2           | 4                    | 9              | 42.6                  | 298    | 34040 | 5.8  | MHC class I                                                                |
| 1817 | P62854           | 4                    | 34             | 42.6                  | 115    | 13015 | 11   | 40S ribosomal protein S26                                                  |
| 1817 | Q5JVVH5          | 4                    | 34             | 42.6                  | 115    | 13001 | 11   | OTTHUMP00000018641                                                         |
| 1818 | Q9UI30           | 4                    | 12             | 42.4                  | 125    | 14199 | 5.3  | TRM112-like protein                                                        |
| 1819 | Q8WUJ1           | 4                    | 7              | 42                    | 112    | 12887 | 4.8  | Churchill protein                                                          |
| 1820 | P07108           | 4                    | 16             | 41.4                  | 87     | 10044 | 6.5  | Acyl-CoA-binding protein                                                   |
| 1820 | Q4VWZ6           | 4                    | 16             | 40.9                  | 88     | 10145 | 6.5  | Diazepam binding inhibitor, splice form 1c                                 |
| 1820 | Q3I231           | 4                    | 16             | 34.6                  | 104    | 11793 | 5.5  | Diazepam-binding protein                                                   |
| 1821 | P07311           | 4                    | 5              | 41.4                  | 99     | 11261 | 9.3  | Acylophosphatase-1                                                         |
| 1822 | Q49AP7           | 4                    | 8              | 41.3                  | 92     | 10739 | 8.5  | C1orf212 protein                                                           |
| 1823 | P52758           | 4                    | 10             | 40.9                  | 137    | 14494 | 8.7  | Ribonuclease UK114                                                         |
| 1824 | Q96C01           | 4                    | 8              | 40.6                  | 138    | 15641 | 7.6  | Hypothetical protein FLJ14668                                              |
| 1825 | O14548           | 4                    | 6              | 40.4                  | 114    | 12615 | 9.4  | Cytochrome c oxidase subunit VIIa-related protein, mitochondrial precursor |
| 1826 | P83916           | 4                    | 9              | 40                    | 185    | 21418 | 4.9  | Chromobox protein homolog 1                                                |
| 1827 | P62306           | 4                    | 37             | 39.5                  | 86     | 9725  | 4.7  | Small nuclear ribonucleoprotein F                                          |
| 1827 | Q6IBQ1           | 4                    | 37             | 39.5                  | 86     | 9711  | 4.7  | SNRPF protein                                                              |
| 1828 | P42677           | 4                    | 55             | 39.3                  | 84     | 9461  | 9.5  | 40S ribosomal protein S27                                                  |
| 1829 | Q9BRA2           | 4                    | 13             | 38.2                  | 123    | 13941 | 5.5  | Thioredoxin-like protein 5                                                 |
| 1830 | P62314           | 4                    | 35             | 37.8                  | 119    | 13282 | 11.6 | Small nuclear ribonucleoprotein Sm D1                                      |
| 1831 | O95182           | 4                    | 10             | 37.2                  | 113    | 12551 | 10.2 | NADH dehydrogenase [ubiquinone] 1 alpha subcomplex subunit 7               |
| 1831 | Q6IB89           | 4                    | 10             | 35.6                  | 118    | 13279 | 10.5 | NDUFA7 protein                                                             |
| 1831 | Q6FG42           | 4                    | 10             | 35.6                  | 118    | 13180 | 10.5 | NDUFA7 protein                                                             |
| 1832 | P00441           | 4                    | 21             | 37                    | 154    | 15936 | 6.1  | Superoxide dismutase [Cu-Zn]                                               |
| 1832 | UPI00001AE968    | 4                    | 21             | 36.5                  | 156    | 16122 | 6.3  | Superoxide dismutase [Cu-Zn] (EC 1.15.1.1).                                |
| 1833 | Q9NX24           | 4                    | 12             | 36.6                  | 153    | 17201 | 8.2  | H/ACA ribonucleoprotein complex subunit 2                                  |
| 1834 | Q8IZQ5           | 4                    | 12             | 36.1                  | 122    | 13407 | 9.6  | Selenoprotein H                                                            |
| 1834 | UPI0000163E14    | 4                    | 12             | 36.1                  | 122    | 13303 | 9.7  | selenoprotein H                                                            |
| 1835 | Q9Y2R0           | 4                    | 13             | 35.8                  | 106    | 11731 | 9.6  | Coiled-coil domain-containing protein 56                                   |
| 1836 | Q9P0M9           | 4                    | 10             | 35.1                  | 148    | 16073 | 10.4 | Mitochondrial 39S ribosomal protein L27                                    |
| 1837 | Q9BYC9           | 4                    | 11             | 34.9                  | 149    | 17443 | 10.9 | 39S ribosomal protein L20, mitochondrial precursor                         |
| 1838 | O43716           | 4                    | 4              | 34.6                  | 136    | 15086 | 5    | Putative protein 15E1.2                                                    |
| 1839 | UPI0000F0A512    | 4                    | 10             | 34.9                  | 350    | 40110 | 5.7  | Guanine nucleotide-binding protein G(k) subunit alpha (G(i) alpha-3)       |
| 1839 | P08754           | 4                    | 10             | 34.5                  | 354    | 40532 | 5.7  | Guanine nucleotide-binding protein G(k) subunit alpha (G(i) alpha-3)       |
| 1840 | P61020           | 4                    | 13             | 34.4                  | 215    | 23707 | 8.1  | Ras-related protein Rab-5B                                                 |
| 1841 | Q3MIH3           | 4                    | 287            | 34.4                  | 128    | 14728 | 9.8  | Ubiquitin A-52 residue ribosomal protein fusion product 1                  |
| 1842 | Q9UI09           | 4                    | 7              | 34.5                  | 145    | 17114 | 9.6  | NADH dehydrogenase [ubiquinone] 1 alpha subcomplex subunit 12              |
| 1842 | Q53XX0           | 4                    | 7              | 34.5                  | 145    | 17084 | 9.6  | 13kDa differentiation-associated protein                                   |
| 1842 | Q53HG1           | 4                    | 7              | 34.2                  | 146    | 17215 | 9.6  | 13kDa differentiation-associated protein variant                           |
| 1843 | Q86U75           | 4                    | 14             | 33.6                  | 619    | 67017 | 6    | Dihydropyrimidinase-like 2                                                 |
| 1844 | Q9BSY4           | 4                    | 5              | 48.2                  | 110    | 12395 | 6.7  | Coiled-coil-helix-coiled-coil-helix domain-containing protein 5            |
| 1844 | Q8N8C4           | 4                    | 5              | 33.5                  | 158    | 17713 | 7.9  | CDNA FLJ39671 fis, clone SMINT2008917                                      |
| 1845 | P62072           | 4                    | 11             | 33.3                  | 90     | 10333 | 6.3  | Mitochondrial import inner membrane translocase subunit Tim10              |
| 1846 | P62910           | 4                    | 26             | 33.3                  | 135    | 15860 | 11.3 | 60S ribosomal protein L32                                                  |
| 1846 | UPI0000073979    | 4                    | 26             | 33.3                  | 135    | 15751 | 10.9 | PREDICTED: similar to 60S ribosomal protein L32                            |
| 1847 | O95298           | 4                    | 6              | 32.8                  | 119    | 14187 | 9    | NADH dehydrogenase [ubiquinone] 1 subunit C2                               |

| No.  | Accession Number | Unique Peptide Count | Spectrum Count | Sequence Coverage (%) | Length | MolWt | pI   | Descriptive Name                                                                                                                                                                                                                                  |
|------|------------------|----------------------|----------------|-----------------------|--------|-------|------|---------------------------------------------------------------------------------------------------------------------------------------------------------------------------------------------------------------------------------------------------|
| 1847 | Q6FIH8           | 4                    | 6              | 32.8                  | 119    | 14173 | 9    | NDUFC2 protein                                                                                                                                                                                                                                    |
| 1848 | P62899           | 4                    | 44             | 32.8                  | 125    | 14463 | 10.5 | 60S ribosomal protein L31                                                                                                                                                                                                                         |
| 1849 | P42167           | 4                    | 10             | 32.4                  | 454    | 50670 | 9.4  | Lamina-associated polypeptide 2, isoforms beta/gamma (Thymopoietin, isoforms beta/gamma) (TP beta/gamma) (Thymopoietin-related peptide isoforms beta/gamma) (TPRP isoforms beta/gamma) [Contains: Thymopoietin (TP) (Splenin); Thymopentin (TP5)] |
| 1850 | P09669           | 4                    | 22             | 32                    | 75     | 8781  | 10.4 | Cytochrome c oxidase polypeptide VIc precursor                                                                                                                                                                                                    |
| 1851 | P50583           | 4                    | 10             | 32                    | 147    | 16829 | 5.3  | Bis(5'-nucleosyl)-tetrphosphatase [asymmetrical]                                                                                                                                                                                                  |
| 1852 | Q5TDQ4           | 4                    | 4              | 31.2                  | 170    | 19550 | 5.6  | HD domain containing 2                                                                                                                                                                                                                            |
| 1852 | Q9Y3D1           | 4                    | 4              | 31.2                  | 170    | 19491 | 5.4  | CGI-130 protein                                                                                                                                                                                                                                   |
| 1852 | Q6NZ49           | 4                    | 4              | 26                    | 204    | 23419 | 5.7  | HD domain containing 2                                                                                                                                                                                                                            |
| 1852 | Q9BTT2           | 4                    | 4              | 24.3                  | 218    | 24850 | 6.2  | HD domain-containing protein 2                                                                                                                                                                                                                    |
| 1853 | P84103           | 4                    | 33             | 31.1                  | 164    | 19330 | 11.6 | Splicing factor, arginine/serine-rich 3                                                                                                                                                                                                           |
| 1854 | Q8N4D3           | 4                    | 6              | 33.6                  | 119    | 13921 | 9.8  | Hypothetical protein                                                                                                                                                                                                                              |
| 1854 | UPI000045715C    | 4                    | 6              | 33.3                  | 120    | 14026 | 9.8  | PREDICTED: similar to NADH dehydrogenase (ubiquinone) 1 beta subcomplex, 4, 15kDa isoform 1                                                                                                                                                       |
| 1854 | Q95168           | 4                    | 6              | 31                    | 129    | 15209 | 9.8  | NADH dehydrogenase [ubiquinone] 1 beta subcomplex subunit 4                                                                                                                                                                                       |
| 1855 | P83876           | 4                    | 9              | 31                    | 142    | 16786 | 5.8  | Thioredoxin-like protein 4A                                                                                                                                                                                                                       |
| 1856 | Q8WW12           | 4                    | 9              | 30.9                  | 178    | 18925 | 7.5  | PEST proteolytic signal-containing nuclear protein                                                                                                                                                                                                |
| 1857 | P51452           | 4                    | 9              | 30.8                  | 185    | 20478 | 7.8  | Dual specificity protein phosphatase 3                                                                                                                                                                                                            |
| 1858 | Q9H2H8           | 4                    | 6              | 30.4                  | 161    | 18155 | 6.8  | Peptidyl-prolyl cis-trans isomerase-like 3                                                                                                                                                                                                        |
| 1859 | Q99627           | 4                    | 8              | 30.1                  | 209    | 23226 | 5.4  | COP9 signalosome complex subunit 8                                                                                                                                                                                                                |
| 1860 | Q9P000           | 4                    | 5              | 29.8                  | 198    | 21819 | 5.9  | COMM domain-containing protein 9                                                                                                                                                                                                                  |
| 1861 | P09104           | 4                    | 7              | 29.7                  | 434    | 47269 | 5    | Gamma-enolase                                                                                                                                                                                                                                     |
| 1862 | Q5W0X3           | 4                    | 9              | 31.1                  | 103    | 11424 | 9.1  | Peptidyl-prolyl cis-trans isomerase                                                                                                                                                                                                               |
| 1862 | P62942           | 4                    | 9              | 29.6                  | 108    | 11951 | 8.2  | FK506-binding protein 1A                                                                                                                                                                                                                          |
| 1863 | Q9H0A8           | 4                    | 5              | 29.6                  | 199    | 21764 | 7.3  | COMM domain-containing protein 4                                                                                                                                                                                                                  |
| 1864 | Q59HE4           | 4                    | 6              | 37.9                  | 103    | 11698 | 7.8  | Hypothetical protein                                                                                                                                                                                                                              |
| 1864 | O15540           | 4                    | 6              | 29.5                  | 132    | 14889 | 5.6  | Fatty acid-binding protein, brain                                                                                                                                                                                                                 |
| 1864 | Q9H047           | 4                    | 6              | 23.5                  | 166    | 18829 | 5.9  | Hypothetical protein DKFZp547J2313                                                                                                                                                                                                                |
| 1865 | Q9Y3U8           | 4                    | 45             | 29.5                  | 105    | 12254 | 11.6 | 60S ribosomal protein L36                                                                                                                                                                                                                         |
| 1866 | Q5T0P8           | 4                    | 49             | 30                    | 130    | 15069 | 10.9 | Ribosomal protein S24                                                                                                                                                                                                                             |
| 1866 | Q7Z3D1           | 4                    | 49             | 29.5                  | 132    | 15326 | 10.8 | Hypothetical protein DKFZp686N1586                                                                                                                                                                                                                |
| 1866 | P62847           | 4                    | 49             | 29.3                  | 133    | 15423 | 10.8 | 40S ribosomal protein S24                                                                                                                                                                                                                         |
| 1867 | O15511           | 4                    | 35             | 29.1                  | 151    | 16320 | 5.7  | Actin-related protein 2/3 complex subunit 5                                                                                                                                                                                                       |
| 1868 | Q9Y5R8           | 4                    | 5              | 29                    | 145    | 16832 | 9.2  | Trafficking protein particle complex subunit 1                                                                                                                                                                                                    |
| 1869 | P82932           | 4                    | 11             | 28.8                  | 125    | 14227 | 9.3  | Mitochondrial 28S ribosomal protein S6                                                                                                                                                                                                            |
| 1870 | Q16540           | 4                    | 9              | 28.8                  | 153    | 17781 | 9.7  | Mitochondrial 39S ribosomal protein L23                                                                                                                                                                                                           |
| 1870 | UPI0000D62587    | 4                    | 9              | 28.8                  | 153    | 17834 | 10   | Mitochondrial 39S ribosomal protein L23 (L23mt) (MRP-L23) (L23 mitochondrial-related protein) (Ribosomal protein L23-like).                                                                                                                       |
| 1870 | UPI00001678B9    | 4                    | 9              | 28.8                  | 153    | 17811 | 9.7  | mitochondrial ribosomal protein L23                                                                                                                                                                                                               |
| 1870 | UPI00001F9AD4    | 4                    | 9              | 27                    | 163    | 18530 | 10.9 | Mitochondrial 39S ribosomal protein L23 (L23mt) (MRP-L23) (L23 mitochondrial-related protein) (Ribosomal protein L23-like).                                                                                                                       |
| 1871 | Q9NZZ4           | 4                    | 8              | 36.7                  | 139    | 16059 | 6.8  | HSPC176                                                                                                                                                                                                                                           |
| 1871 | Q9UL33           | 4                    | 8              | 36.4                  | 140    | 16146 | 6.8  | Trafficking protein particle complex 2-like protein                                                                                                                                                                                               |
| 1871 | Q6ZTA7           | 4                    | 8              | 28.8                  | 177    | 20021 | 8.2  | CDNA FLJ44827 fis, clone BRACE3046837                                                                                                                                                                                                             |
| 1872 | P26447           | 4                    | 21             | 28.7                  | 101    | 11728 | 6.1  | Protein S100-A4                                                                                                                                                                                                                                   |
| 1873 | Q8TB65           | 4                    | 22             | 28.7                  | 150    | 16762 | 6.8  | Cytochrome c oxidase subunit Va                                                                                                                                                                                                                   |
| 1874 | Q9Y3B2           | 4                    | 7              | 28.7                  | 195    | 21452 | 8.2  | 3'-5' exoribonuclease CSL4 homolog                                                                                                                                                                                                                |
| 1875 | P60033           | 4                    | 17             | 28.4                  | 236    | 25809 | 5.3  | CD81 antigen                                                                                                                                                                                                                                      |
| 1875 | UPI000066D8DE    | 4                    | 17             | 24.5                  | 274    | 29806 | 6.9  | CD81 antigen (26 kDa cell surface protein TAPA-1) (Target of the antiproliferative antibody 1) (Tetraspanin-28) (Tspan-28).                                                                                                                       |
| 1876 | P56556           | 4                    | 11             | 28.1                  | 128    | 15137 | 10   | NADH dehydrogenase [ubiquinone] 1 alpha subcomplex subunit 6                                                                                                                                                                                      |
| 1876 | Q6IBT8           | 4                    | 11             | 28.1                  | 128    | 15185 | 10   | NDUFA6 protein                                                                                                                                                                                                                                    |
| 1877 | Q8IW87           | 4                    | 6              | 27.8                  | 227    | 24434 | 6.9  | Candidate tumor suppressor in ovarian cancer 2                                                                                                                                                                                                    |
| 1877 | Q8WZ82           | 4                    | 6              | 27.8                  | 227    | 24418 | 6.9  | Candidate tumor suppressor OVCA2                                                                                                                                                                                                                  |
| 1878 | O00762           | 4                    | 7              | 27.4                  | 179    | 19652 | 7.4  | Ubiquitin-conjugating enzyme E2 C                                                                                                                                                                                                                 |
| 1879 | O43583           | 4                    | 13             | 27.3                  | 198    | 22092 | 5.3  | Density-regulated protein                                                                                                                                                                                                                         |
| 1879 | UPI00004566A8    | 4                    | 13             | 27.1                  | 199    | 22285 | 5.6  | Density-regulated protein (DRP) (Protein DRP1) (Smooth muscle cell-associated protein 3) (SMAP-3).                                                                                                                                                |
| 1880 | Q9NRW3           | 4                    | 6              | 26.8                  | 190    | 22826 | 7.6  | Probable DNA dC- dU-editing enzyme APOBEC-3C                                                                                                                                                                                                      |
| 1881 | P00374           | 4                    | 8              | 26.7                  | 187    | 21453 | 7.4  | Dihydrofolate reductase                                                                                                                                                                                                                           |
| 1882 | A2BEH4           | 4                    | 13             | 29.6                  | 196    | 20942 | 4.9  | Proteasome (Prosome, macropain) subunit beta type 9                                                                                                                                                                                               |
| 1882 | P28065-2         | 4                    | 13             | 27.8                  | 209    | 22328 | 5    | Isoform LMP2.S of P28065                                                                                                                                                                                                                          |
| 1882 | A2BEH1           | 4                    | 13             | 26.5                  | 219    | 23245 | 5    | Proteasome (Prosome, macropain) subunit beta type 9                                                                                                                                                                                               |
| 1882 | P28065           | 4                    | 13             | 26.5                  | 219    | 23264 | 5    | Proteasome subunit beta type 9 precursor                                                                                                                                                                                                          |
| 1883 | P55795           | 4                    | 12             | 26.5                  | 449    | 49264 | 6.3  | Heterogeneous nuclear ribonucleoprotein H'                                                                                                                                                                                                        |
| 1884 | Q99470           | 4                    | 7              | 26.5                  | 211    | 23026 | 7.3  | Stromal cell-derived factor 2 precursor                                                                                                                                                                                                           |
| 1885 | Q9H0U6           | 4                    | 8              | 26.1                  | 180    | 20577 | 9.5  | 39S ribosomal protein L18, mitochondrial precursor                                                                                                                                                                                                |

| No.  | Accession Number | Unique Peptide Count | Spectrum Count | Sequence Coverage (%) | Length | MolWt | pI   | Descriptive Name                                                                                                                           |
|------|------------------|----------------------|----------------|-----------------------|--------|-------|------|--------------------------------------------------------------------------------------------------------------------------------------------|
| 1886 | P32970           | 4                    | 15             | 25.9                  | 193    | 21118 | 8.5  | Tumor necrosis factor ligand superfamily member 7                                                                                          |
| 1887 | Q9H773           | 4                    | 5              | 25.9                  | 170    | 18681 | 5    | CDNA: FLJ21190 fis, clone CAS12333                                                                                                         |
| 1888 | P15927           | 4                    | 4              | 25.6                  | 270    | 29247 | 6.1  | Replication protein A 32 kDa subunit                                                                                                       |
| 1888 | P15927-2         | 4                    | 4              | 24.8                  | 278    | 30156 | 7    | Isoform 2 of P15927                                                                                                                        |
| 1888 | P15927-3         | 4                    | 4              | 19.3                  | 358    | 38810 | 8.9  | Isoform 3 of P15927                                                                                                                        |
| 1889 | P83731           | 4                    | 49             | 25.5                  | 157    | 17779 | 11.3 | 60S ribosomal protein L24                                                                                                                  |
| 1890 | Q8N6M0           | 4                    | 5              | 25.3                  | 293    | 33813 | 6    | OTU domain-containing protein 6B                                                                                                           |
| 1891 | gij12345 prg     | 4                    | 1405           | 26                    | 223    | 23476 | 7.9  | Promega sequencing grade modified trypsin                                                                                                  |
| 1891 | IPITrypsinPIG    | 4                    | 1405           | 25.1                  | 231    | 24409 | 7.2  | TRYP_PIG                                                                                                                                   |
| 1892 | P13987           | 4                    | 63             | 25                    | 128    | 14177 | 6.5  | CD59 glycoprotein precursor                                                                                                                |
| 1893 | P52298           | 4                    | 6              | 25                    | 156    | 18001 | 8.2  | Nuclear cap-binding protein subunit 2                                                                                                      |
| 1894 | P05161           | 4                    | 4              | 24.8                  | 165    | 17887 | 7.5  | Interferon-induced 17 kDa protein precursor<br>[Contains: Ubiquitin cross-reactive protein (hUCRP)<br>(Interferon-induced 15 kDa protein)] |
| 1895 | P62166           | 4                    | 5              | 24.7                  | 190    | 21879 | 4.8  | Neuronal calcium sensor 1                                                                                                                  |
| 1896 | Q9H061           | 4                    | 6              | 24.6                  | 195    | 21527 | 9.3  | Transmembrane protein 126A                                                                                                                 |
| 1897 | Q13257           | 4                    | 10             | 24.4                  | 205    | 23510 | 5.1  | Mitotic spindle assembly checkpoint protein MAD2A                                                                                          |
| 1897 | Q6IRW7           | 4                    | 10             | 24.4                  | 205    | 23496 | 5.1  | MAD2 mitotic arrest deficient-like 1                                                                                                       |
| 1897 | Q53F56           | 4                    | 10             | 24.4                  | 205    | 23526 | 5.1  | MAD2-like 1 variant                                                                                                                        |
| 1898 | Q9Y3D6           | 4                    | 26             | 24.3                  | 152    | 16938 | 8.8  | Mitochondrial fission 1 protein                                                                                                            |
| 1898 | UPI0000073ACD    | 4                    | 26             | 24.3                  | 152    | 16980 | 8.8  | tetratricopeptide repeat domain 11                                                                                                         |
| 1899 | P24941           | 4                    | 5              | 24.2                  | 298    | 33930 | 8.7  | Cell division protein kinase 2                                                                                                             |
| 1900 | Q9NPA0           | 4                    | 10             | 24                    | 242    | 26471 | 9.2  | Uncharacterized protein C15orf24 precursor                                                                                                 |
| 1901 | O00217           | 4                    | 17             | 23.8                  | 210    | 23705 | 6.3  | NADH dehydrogenase [ubiquinone] iron-sulfur<br>protein 8, mitochondrial precursor                                                          |
| 1902 | P60510           | 4                    | 11             | 23.8                  | 307    | 35080 | 5.1  | Serine/threonine-protein phosphatase 4 catalytic<br>subunit                                                                                |
| 1903 | P35219           | 4                    | 9              | 23.4                  | 290    | 32973 | 4.9  | Carbonic anhydrase-related protein                                                                                                         |
| 1904 | Q5SPS5           | 4                    | 8              | 24.6                  | 615    | 67971 | 9.5  | Poly(A) binding protein, cytoplasmic 4                                                                                                     |
| 1904 | Q13310           | 4                    | 8              | 23.4                  | 644    | 70783 | 9.3  | Polyadenylate-binding protein 4 (Poly(A)-binding<br>protein 4) (PABP 4) (Inducible poly(A)-binding<br>protein)                             |
| 1904 | Q6IQ30           | 4                    | 8              | 22.9                  | 660    | 72361 | 9.3  | PABPC4 protein                                                                                                                             |
| 1904 | Q5SPS6           | 4                    | 8              | 22.9                  | 660    | 72391 | 9.3  | Poly(A) binding protein, cytoplasmic 4                                                                                                     |
| 1905 | Q9NYL4           | 4                    | 11             | 23.4                  | 201    | 22180 | 9.4  | FK506-binding protein 11 precursor                                                                                                         |
| 1906 | Q5TBA5           | 4                    | 5              | 23.3                  | 275    | 30009 | 5.3  | OTTHUMP00000018264                                                                                                                         |
| 1906 | Q96B26           | 4                    | 5              | 23.2                  | 276    | 30040 | 5.3  | Exosome complex exonuclease RRP43                                                                                                          |
| 1907 | Q09028           | 4                    | 8              | 23.1                  | 425    | 47656 | 4.9  | Histone-binding protein RBBP4                                                                                                              |
| 1908 | O15173           | 4                    | 8              | 22.9                  | 223    | 23818 | 4.9  | Membrane-associated progesterone receptor<br>component 2                                                                                   |
| 1909 | P02511           | 4                    | 6              | 22.9                  | 175    | 20159 | 7.3  | Alpha crystallin B chain (Alpha(B)-crystallin)                                                                                             |
| 1910 | Q9H081           | 4                    | 5              | 22.9                  | 205    | 24140 | 5.7  | Protein MIS12 homolog                                                                                                                      |
| 1911 | P01033           | 4                    | 4              | 22.7                  | 207    | 23171 | 8.1  | Metalloproteinase inhibitor 1 precursor                                                                                                    |
| 1912 | Q53FP0           | 4                    | 4              | 22.6                  | 261    | 29916 | 7.4  | Pyridoxine 5'-phosphate oxidase variant                                                                                                    |
| 1912 | Q9NVS9           | 4                    | 4              | 22.6                  | 261    | 29988 | 7.1  | Pyridoxine-5'-phosphate oxidase                                                                                                            |
| 1913 | Q92522           | 4                    | 25             | 22.5                  | 213    | 22487 | 10.8 | Histone H1x                                                                                                                                |
| 1914 | Q96CT7           | 4                    | 10             | 22.4                  | 223    | 25835 | 9.5  | Coiled-coil domain-containing protein 124                                                                                                  |
| 1915 | UPI0000456BFD    | 4                    | 7              | 22.3                  | 309    | 34948 | 9.3  | Mitochondrial 39S ribosomal protein L4 (L4mt) (MRP-<br>L4).                                                                                |
| 1915 | Q9BYD3           | 4                    | 7              | 22.2                  | 311    | 34919 | 9.7  | Mitochondrial 39S ribosomal protein L4                                                                                                     |
| 1916 | Q9UFW8           | 4                    | 4              | 22.2                  | 167    | 18820 | 9    | CGG triplet repeat-binding protein 1                                                                                                       |
| 1917 | O14735           | 4                    | 23             | 22.1                  | 213    | 23539 | 8    | CDP-diacylglycerol--inositol 3-<br>phosphatidyltransferase                                                                                 |
| 1917 | Q53HA5           | 4                    | 23             | 22.1                  | 213    | 23558 | 8.3  | CDP-diacylglycerol--inositol 3-<br>phosphatidyltransferase isoform 1 variant                                                               |
| 1918 | Q13442           | 4                    | 14             | 22.1                  | 181    | 20630 | 8.9  | 28 kDa heat- and acid-stable phosphoprotein                                                                                                |
| 1919 | Q9Y3D9           | 4                    | 9              | 22.1                  | 190    | 21771 | 8.9  | Mitochondrial ribosomal protein S23                                                                                                        |
| 1920 | Q13637           | 4                    | 15             | 21.8                  | 225    | 24997 | 6.5  | Ras-related protein Rab-32                                                                                                                 |
| 1921 | Q9Y3A4           | 4                    | 4              | 21.8                  | 280    | 32334 | 9.6  | Gastric cancer antigen Zg14                                                                                                                |
| 1922 | UPI00003667A5    | 4                    | 51             | 24                    | 242    | 26818 | 5.1  | CD82 antigen isoform 2                                                                                                                     |
| 1922 | P27701           | 4                    | 51             | 21.7                  | 267    | 29626 | 5.2  | CD82 antigen                                                                                                                               |
| 1922 | Q7Z2D4           | 4                    | 51             | 21.7                  | 267    | 29611 | 5.2  | CD82 molecule                                                                                                                              |
| 1922 | Q6LET0           | 4                    | 51             | 21.7                  | 267    | 29644 | 5.2  | KAI1 protein                                                                                                                               |
| 1923 | Q96GC5           | 4                    | 11             | 21.7                  | 212    | 23935 | 9    | 39S ribosomal protein L48, mitochondrial precursor                                                                                         |
| 1924 | Q8N0U8           | 4                    | 44             | 21.6                  | 176    | 19836 | 9.1  | Vitamin K epoxide reductase complex subunit 1-like<br>protein 1                                                                            |
| 1925 | Q5TIF0           | 4                    | 9              | 21.4                  | 234    | 26761 | 5    | Syntaxin 12                                                                                                                                |
| 1925 | Q6LEU0           | 4                    | 9              | 18.6                  | 269    | 30878 | 5.8  | STX12 protein                                                                                                                              |
| 1925 | Q86Y82           | 4                    | 9              | 18.1                  | 276    | 31642 | 5.6  | Syntaxin-12                                                                                                                                |
| 1926 | Q9Y3A3-2         | 4                    | 7              | 24.9                  | 193    | 22318 | 6.1  | Isoform 2 of Q9Y3A3                                                                                                                        |
| 1926 | Q9Y3A3           | 4                    | 7              | 21.3                  | 225    | 26032 | 5.8  | Preimplantation protein 3                                                                                                                  |
| 1927 | UPI0000D61D3B    | 4                    | 7              | 23.5                  | 179    | 20084 | 9.4  | Protein FAM121B precursor.                                                                                                                 |
| 1927 | Q9BUR5-2         | 4                    | 7              | 23.3                  | 180    | 20199 | 9.3  | Isoform 2 of Q9BUR5                                                                                                                        |
| 1927 | Q9BUR5           | 4                    | 7              | 21.2                  | 198    | 22285 | 9.1  | Apolipoprotein O precursor                                                                                                                 |
| 1928 | P09012           | 4                    | 14             | 20.9                  | 282    | 31280 | 9.8  | U1 small nuclear ribonucleoprotein A                                                                                                       |
| 1929 | Q7LG56           | 4                    | 8              | 20.8                  | 351    | 40737 | 5    | Ribonucleoside-diphosphate reductase M2 subunit B                                                                                          |
| 1930 | P67812           | 4                    | 66             | 20.7                  | 179    | 20625 | 9.5  | Signal peptidase complex catalytic subunit SEC11A                                                                                          |
| 1930 | Q6IAM7           | 4                    | 66             | 20.7                  | 179    | 20611 | 9.5  | SPC18 protein                                                                                                                              |

| No.  | Accession Number | Unique Peptide Count | Spectrum Count | Sequence Coverage (%) | Length | MolWt | pI   | Descriptive Name                                                                                                                                                                                     |
|------|------------------|----------------------|----------------|-----------------------|--------|-------|------|------------------------------------------------------------------------------------------------------------------------------------------------------------------------------------------------------|
| 1930 | Q53FQ8           | 4                    | 66             | 20.7                  | 179    | 20613 | 9.5  | Signal peptidase complex (18kD) variant                                                                                                                                                              |
| 1931 | A4D0R4           | 4                    | 11             | 20.4                  | 240    | 28191 | 9.6  | B-cell receptor-associated protein 29                                                                                                                                                                |
| 1931 | Q9UHQ4           | 4                    | 11             | 20.3                  | 241    | 28320 | 9.5  | B-cell receptor-associated protein 29                                                                                                                                                                |
| 1931 | UPI000049A623    | 4                    | 11             | 20.1                  | 244    | 28731 | 9.5  | B-cell receptor-associated protein BAP29 isoform d                                                                                                                                                   |
| 1931 | UPI000049A622    | 4                    | 11             | 14.5                  | 337    | 39102 | 9.3  | B-cell receptor-associated protein BAP29 isoform c                                                                                                                                                   |
| 1931 | UPI000049A621    | 4                    | 11             | 14.1                  | 348    | 40797 | 9.7  | B-cell receptor-associated protein BAP29 isoform a                                                                                                                                                   |
| 1932 | Q9BUB7           | 4                    | 11             | 20.4                  | 260    | 28969 | 8.9  | Transmembrane protein 70                                                                                                                                                                             |
| 1933 | Q9BUT1           | 4                    | 9              | 20.4                  | 245    | 26724 | 7.6  | 3-hydroxybutyrate dehydrogenase type 2                                                                                                                                                               |
| 1934 | O43633           | 4                    | 7              | 20.3                  | 222    | 25104 | 6    | Charged multivesicular body protein 2a                                                                                                                                                               |
| 1935 | Q16740           | 4                    | 11             | 20.2                  | 277    | 30180 | 8.1  | Putative ATP-dependent Clp protease proteolytic subunit, mitochondrial precursor                                                                                                                     |
| 1936 | Q9BYD2           | 4                    | 8              | 20.2                  | 267    | 30185 | 10.1 | 39S ribosomal protein L9, mitochondrial precursor                                                                                                                                                    |
| 1936 | UPI000013D8FA    | 4                    | 8              | 20.2                  | 267    | 30243 | 10.1 | mitochondrial ribosomal protein L9                                                                                                                                                                   |
| 1937 | Q96CN7           | 4                    | 5              | 20.1                  | 298    | 32237 | 7.4  | Isochorismatase domain-containing protein 1                                                                                                                                                          |
| 1938 | P34741           | 4                    | 7              | 19.9                  | 201    | 22174 | 4.9  | Syndecan-2 precursor                                                                                                                                                                                 |
| 1938 | Q6PIS6           | 4                    | 7              | 19.9                  | 201    | 22160 | 4.9  | Syndecan 2                                                                                                                                                                                           |
| 1939 | Q13243           | 4                    | 16             | 19.9                  | 272    | 31264 | 11.6 | Splicing factor, arginine/serine-rich 5                                                                                                                                                              |
| 1940 | A4FVB3           | 4                    | 10             | 19.4                  | 299    | 32568 | 7.9  | SPRY4 protein                                                                                                                                                                                        |
| 1940 | Q9C004           | 4                    | 10             | 19.4                  | 299    | 32541 | 7.9  | Sprouty homolog 4                                                                                                                                                                                    |
| 1941 | P48507           | 4                    | 5              | 19                    | 274    | 30727 | 6    | Glutamate--cysteine ligase regulatory subunit                                                                                                                                                        |
| 1942 | Q8N4B7           | 4                    | 4              | 18.9                  | 301    | 31905 | 4.4  | Cell growth regulator with EF-hand domain 1                                                                                                                                                          |
| 1942 | UPI0000456D95    | 4                    | 4              | 18.7                  | 305    | 32178 | 4.4  | Cell growth regulator with EF hand domain protein 1 (Cell growth regulatory gene 11 protein).                                                                                                        |
| 1943 | P10109           | 4                    | 10             | 18.5                  | 184    | 19393 | 5.8  | Adrenodoxin, mitochondrial precursor                                                                                                                                                                 |
| 1944 | Q53FU2           | 4                    | 5              | 18.4                  | 342    | 36751 | 5.2  | Methylosome protein 50 variant                                                                                                                                                                       |
| 1944 | Q9BQA1           | 4                    | 5              | 18.4                  | 342    | 36724 | 5.2  | Methylosome protein 50                                                                                                                                                                               |
| 1945 | Q9HD15           | 4                    | 7              | 18.2                  | 236    | 25673 | 7    | Steroid receptor RNA activator 1                                                                                                                                                                     |
| 1946 | Q9UEH5           | 4                    | 14             | 19.5                  | 231    | 25430 | 7.4  | 24-kDa subunit of complex I                                                                                                                                                                          |
| 1946 | P19404           | 4                    | 14             | 18.1                  | 249    | 27392 | 8.1  | NADH dehydrogenase [ubiquinone] flavoprotein 2, mitochondrial precursor                                                                                                                              |
| 1946 | Q6IPW4           | 4                    | 14             | 18.1                  | 249    | 27364 | 8.1  | NADH dehydrogenase (Ubiquinone) flavoprotein 2, 24kDa                                                                                                                                                |
| 1946 | Q6IB76           | 4                    | 14             | 18.1                  | 249    | 27349 | 8.1  | NDUFV2 protein                                                                                                                                                                                       |
| 1947 | P62995-3         | 4                    | 22             | 27.7                  | 188    | 21935 | 10.2 | Isoform 3 of P62995                                                                                                                                                                                  |
| 1947 | Q68DZ9           | 4                    | 22             | 18.8                  | 276    | 32321 | 11.4 | Hypothetical protein DKFZp686F18120                                                                                                                                                                  |
| 1947 | Q59GA1           | 4                    | 22             | 18.7                  | 278    | 32274 | 11.1 | Splicing factor, arginine/serine-rich 10 (Transformer 2 homolog, Drosophila) variant                                                                                                                 |
| 1947 | P62995           | 4                    | 22             | 18.1                  | 288    | 33666 | 11.2 | Arginine/serine-rich-splicing factor 10                                                                                                                                                              |
| 1947 | UPI0000D61BC0    | 4                    | 22             | 18                    | 289    | 33699 | 10.8 | Arginine/serine-rich-splicing factor 10 (Transformer-2-beta) (HTRA2- beta) (Transformer 2 protein homolog).                                                                                          |
| 1948 | Q96HS1           | 4                    | 7              | 18                    | 255    | 28006 | 7.3  | Phosphoglycerate mutase family member 5                                                                                                                                                              |
| 1948 | UPI00001400B6    | 4                    | 7              | 18                    | 255    | 28020 | 7.3  | Bcl-XL-binding protein v68                                                                                                                                                                           |
| 1949 | Q9P015           | 4                    | 6              | 17.9                  | 296    | 33420 | 10   | 39S ribosomal protein L15, mitochondrial precursor                                                                                                                                                   |
| 1950 | O15260-2         | 4                    | 94             | 30.2                  | 159    | 17970 | 6.1  | Isoform 2 of O15260                                                                                                                                                                                  |
| 1950 | UPI0000D6193B    | 4                    | 94             | 25.8                  | 186    | 21115 | 7.2  | Surfeit locus protein 4.                                                                                                                                                                             |
| 1950 | Q5T8U5           | 4                    | 94             | 25.8                  | 186    | 21128 | 6.5  | Surfeit 4                                                                                                                                                                                            |
| 1950 | Q5T8U7           | 4                    | 94             | 25.5                  | 188    | 21130 | 8.6  | Surfeit 4                                                                                                                                                                                            |
| 1950 | UPI0000D6193C    | 4                    | 94             | 25.3                  | 190    | 21331 | 8.6  | Surfeit locus protein 4.                                                                                                                                                                             |
| 1950 | O15260           | 4                    | 94             | 17.8                  | 269    | 30394 | 7.8  | Surfeit locus protein 4                                                                                                                                                                              |
| 1951 | P43307           | 4                    | 17             | 17.8                  | 286    | 32235 | 4.5  | Translocon-associated protein subunit alpha precursor                                                                                                                                                |
| 1951 | UPI000016789F    | 4                    | 17             | 17.8                  | 286    | 32183 | 4.5  | signal sequence receptor, alpha                                                                                                                                                                      |
| 1952 | Q96GK7           | 4                    | 8              | 17.8                  | 314    | 34596 | 8.2  | Fumarylacetoacetate hydrolase domain-containing protein 2A                                                                                                                                           |
| 1953 | Q9NZ43           | 4                    | 6              | 17.8                  | 259    | 29345 | 9.1  | Vesicle transport protein USE1                                                                                                                                                                       |
| 1953 | UPI0000456C39    | 4                    | 6              | 17.8                  | 259    | 29369 | 9.1  | Vesicle transport protein USE1 (USE1-like protein) (Putative MAPK- activating protein PM26) (Protein p31).                                                                                           |
| 1954 | UPI00001D7FA4    | 4                    | 4              | 17.7                  | 294    | 33620 | 5.3  | hypothetical protein LOC285636                                                                                                                                                                       |
| 1955 | Q96AH2           | 4                    | 10             | 28.6                  | 168    | 18793 | 5.2  | Similar to mannose-6-phosphate receptor                                                                                                                                                              |
| 1955 | P20645           | 4                    | 10             | 17.3                  | 277    | 30993 | 5.8  | Cation-dependent mannose-6-phosphate receptor precursor                                                                                                                                              |
| 1955 | Q6I9U3           | 4                    | 10             | 17.3                  | 277    | 30975 | 5.8  | M6PR protein                                                                                                                                                                                         |
| 1955 | Q53GY9           | 4                    | 10             | 17.3                  | 277    | 31019 | 5.8  | Cation-dependent mannose-6-phosphate receptor variant                                                                                                                                                |
| 1956 | Q96GA7           | 4                    | 4              | 17.3                  | 329    | 34674 | 6.9  | Serine dehydratase-like                                                                                                                                                                              |
| 1957 | O95721           | 4                    | 12             | 17.1                  | 258    | 28970 | 5.8  | Synaptosomal-associated protein 29                                                                                                                                                                   |
| 1958 | Q5J9I4           | 4                    | 5              | 17.4                  | 293    | 32186 | 9.4  | Proliferation-inducing protein 16                                                                                                                                                                    |
| 1958 | P29372-2         | 4                    | 5              | 17.4                  | 293    | 32181 | 9.4  | Isoform 2 of P29372                                                                                                                                                                                  |
| 1958 | P29372           | 4                    | 5              | 17.1                  | 298    | 32864 | 9.6  | DNA-3-methyladenine glycosylase                                                                                                                                                                      |
| 1958 | Q1W6H1           | 4                    | 5              | 17.1                  | 298    | 32869 | 9.6  | DNA-3-methyladenine glycosylase                                                                                                                                                                      |
| 1959 | Q92600           | 4                    | 7              | 17.1                  | 299    | 33631 | 8    | Protein RCD1 homolog                                                                                                                                                                                 |
| 1960 | P42574           | 4                    | 6              | 17                    | 277    | 31608 | 6.5  | Caspase-3 precursor (EC 3.4.22.56) (CASP-3) (Apopain) (Cysteine protease CPP32) (Yama protein) (CPP-32) (SREBP cleavage activity 1) (SCA-1) [Contains: Caspase-3 p17 subunit; Caspase-3 p12 subunit] |
| 1961 | O60362           | 4                    | 6              | 16.9                  | 242    | 27310 | 8.9  | Hypothetical protein 44M2.1                                                                                                                                                                          |

| No.  | Accession Number | Unique Peptide Count | Spectrum Count | Sequence Coverage (%) | Length | MolWt | pI  | Descriptive Name                                                                                                                                                                                                                                                       |
|------|------------------|----------------------|----------------|-----------------------|--------|-------|-----|------------------------------------------------------------------------------------------------------------------------------------------------------------------------------------------------------------------------------------------------------------------------|
| 1961 | Q9NXG2           | 4                    | 6              | 11.6                  | 353    | 39315 | 7.9 | THUMP domain-containing protein 1                                                                                                                                                                                                                                      |
| 1961 | UPI000059D337    | 4                    | 6              | 9.3                   | 439    | 48549 | 8.8 | THUMP domain-containing protein 1.                                                                                                                                                                                                                                     |
| 1961 | Q6MZT3           | 4                    | 6              | 9.3                   | 439    | 48491 | 8.9 | Hypothetical protein DKFZp686C1054                                                                                                                                                                                                                                     |
| 1962 | Q9Y619           | 4                    | 4              | 16.9                  | 301    | 32736 | 9.1 | Mitochondrial ornithine transporter 1                                                                                                                                                                                                                                  |
| 1963 | Q9HD42           | 4                    | 7              | 16.8                  | 196    | 21703 | 8.1 | Charged multivesicular body protein 1a                                                                                                                                                                                                                                 |
| 1964 | Q9Y394-2         | 4                    | 6              | 19.7                  | 289    | 32268 | 8.9 | Isoform 2 of Q9Y394                                                                                                                                                                                                                                                    |
| 1964 | Q9Y394           | 4                    | 6              | 16.8                  | 339    | 38299 | 8.3 | Dehydrogenase/reductase SDR family member 7 precursor                                                                                                                                                                                                                  |
| 1965 | P28072           | 4                    | 24             | 16.7                  | 239    | 25358 | 4.9 | Proteasome subunit beta type 6 precursor                                                                                                                                                                                                                               |
| 1966 | Q53GB6           | 4                    | 6              | 16.7                  | 365    | 40954 | 8   | Actin related protein 2/3 complex subunit 1A variant                                                                                                                                                                                                                   |
| 1966 | Q92747           | 4                    | 6              | 16.5                  | 370    | 41569 | 8.2 | Actin-related protein 2/3 complex subunit 1A                                                                                                                                                                                                                           |
| 1967 | Q6FIA0           | 4                    | 7              | 16.7                  | 329    | 36568 | 4.6 | HSPC142 protein                                                                                                                                                                                                                                                        |
| 1967 | UPI000013C7E6    | 4                    | 7              | 16.7                  | 329    | 36427 | 4.7 | CDNA FLJ20571 fis, clone REC01040 (HSPC142 protein) (Hypothetical protein DKFZp564N2378).                                                                                                                                                                              |
| 1967 | Q9NWX8           | 4                    | 7              | 16.7                  | 329    | 36560 | 4.6 | CDNA FLJ20571 fis, clone REC01040                                                                                                                                                                                                                                      |
| 1968 | Q969Q5           | 4                    | 6              | 16.7                  | 203    | 23124 | 6.2 | Ras-related protein Rab-24                                                                                                                                                                                                                                             |
| 1969 | UPI00001FC123    | 4                    | 12             | 22.3                  | 247    | 28285 | 7   | AMP-activated protein kinase, noncatalytic gamma-1 subunit isoform 2                                                                                                                                                                                                   |
| 1969 | P54619           | 4                    | 12             | 16.6                  | 331    | 37579 | 6.9 | 5'-AMP-activated protein kinase subunit gamma-1                                                                                                                                                                                                                        |
| 1969 | Q8N7V9           | 4                    | 12             | 16.2                  | 340    | 38533 | 7.1 | CDNA FLJ40287 fis, clone TESTI2027909, highly similar to 5'-AMP- ACTIVATED PROTEIN KINASE, GAMMA-1 SUBUNIT                                                                                                                                                             |
| 1970 | Q8N959           | 4                    | 12             | 20.1                  | 323    | 35226 | 6.3 | CDNA FLJ38330 fis, clone FCBBF3025280, highly similar to NDRG1 PROTEIN                                                                                                                                                                                                 |
| 1970 | Q597H1           | 4                    | 12             | 16.5                  | 394    | 42819 | 5.8 | Transformation-related protein 14                                                                                                                                                                                                                                      |
| 1970 | UPI0000D62506    | 4                    | 12             | 16.5                  | 394    | 42834 | 5.8 | Protein NDRG1 (N-myc downstream-regulated gene 1 protein) (Differentiation-related gene 1 protein) (DRG-1) (Reducing agents and tunicamycin-responsive protein) (RTP) (Nickel-specific induction protein Cap43) (Rit42).                                               |
| 1970 | Q92597           | 4                    | 12             | 16.5                  | 394    | 42835 | 5.8 | Protein NDRG1                                                                                                                                                                                                                                                          |
| 1971 | Q9NRN7           | 4                    | 7              | 16.5                  | 309    | 35776 | 6.8 | L-aminoadipate-semialdehyde dehydrogenase-phosphopantetheinyl transferase                                                                                                                                                                                              |
| 1972 | Q712K3           | 4                    | 9              | 16.4                  | 238    | 27166 | 4.4 | Ubiquitin-conjugating enzyme E2 R2                                                                                                                                                                                                                                     |
| 1973 | Q96B36           | 4                    | 6              | 16.4                  | 256    | 27383 | 4.7 | Proline-rich AKT1 substrate 1                                                                                                                                                                                                                                          |
| 1973 | UPI0000071F14    | 4                    | 6              | 16.4                  | 256    | 27409 | 4.7 | AKT1 substrate 1 (proline-rich)                                                                                                                                                                                                                                        |
| 1974 | Q9NR45           | 4                    | 5              | 16.4                  | 359    | 40308 | 6.7 | Sialic acid synthase                                                                                                                                                                                                                                                   |
| 1975 | Q8NBQ5           | 4                    | 12             | 16.3                  | 300    | 32964 | 9.2 | Dehydrogenase/reductase SDR family member 8 precursor                                                                                                                                                                                                                  |
| 1975 | UPI00006C088F    | 4                    | 12             | 16.3                  | 300    | 33014 | 9.3 | PREDICTED: similar to Dehydrogenase/reductase SDR family member 8 precursor (17-beta-hydroxysteroid dehydrogenase 11) (17-beta-HSD 11) (17-beta-HSD XI) (17betaHSDXI) (17bHSD11) (17betaHSD11) (Retinal short-chain dehydrogenase/reductase 2) (retSDR2) (Cutaneous... |
| 1975 | UPI000013FB48    | 4                    | 12             | 16.3                  | 300    | 32936 | 9.1 | Dehydrogenase/reductase SDR family member 8 precursor (EC 1.1.1.-) (17-beta-hydroxysteroid dehydrogenase 11) (17-beta-HSD 11) (17-beta- HSD XI) (17betaHSDXI) (17bHSD11) (17betaHSD11) (Retinal short-chain dehydrogenase/reductase 2) (retSDR2) (Cutaneous T-c        |
| 1976 | Q96011           | 4                    | 8              | 16.2                  | 259    | 28431 | 9.8 | Peroxisomal membrane protein 11B                                                                                                                                                                                                                                       |
| 1977 | Q15257-3         | 4                    | 5              | 19.7                  | 294    | 33467 | 6.3 | Isoform 3 of Q15257                                                                                                                                                                                                                                                    |
| 1977 | Q15257-2         | 4                    | 5              | 18                    | 323    | 36775 | 6.3 | Isoform 1 of Q15257                                                                                                                                                                                                                                                    |
| 1977 | Q15257           | 4                    | 5              | 16.2                  | 358    | 40668 | 5.9 | Serine/threonine-protein phosphatase 2A regulatory subunit B'                                                                                                                                                                                                          |
| 1978 | Q43681           | 4                    | 8              | 16.1                  | 348    | 38793 | 4.9 | Arsenical pump-driving ATPase                                                                                                                                                                                                                                          |
| 1978 | UPI0000D61731    | 4                    | 8              | 15.4                  | 363    | 40226 | 5.1 | Arsenical pump-driving ATPase (EC 3.6.3.16) (Arsenite-translocating ATPase) (Arsenical resistance ATPase) (Arsenite-transporting ATPase) (ARSA) (ASNA-I).                                                                                                              |
| 1979 | P42126-2         | 4                    | 14             | 16.8                  | 285    | 30896 | 8.9 | Isoform 2 of P42126                                                                                                                                                                                                                                                    |
| 1979 | P42126           | 4                    | 14             | 15.9                  | 302    | 32816 | 8.6 | 3,2-trans-enoyl-CoA isomerase, mitochondrial precursor (EC 5.3.3.8) (Dodecenoyl-CoA isomerase) (Delta(3),Delta(2)-enoyl-CoA isomerase)                                                                                                                                 |
| 1980 | Q9UBV8           | 4                    | 9              | 15.8                  | 284    | 30381 | 6.5 | Peflin                                                                                                                                                                                                                                                                 |
| 1981 | Q99447           | 4                    | 5              | 15.7                  | 389    | 43835 | 6.9 | Ethanolamine-phosphate cytidyltransferase                                                                                                                                                                                                                              |
| 1982 | P61964           | 4                    | 5              | 15.6                  | 334    | 36589 | 8.3 | WD repeat protein 5                                                                                                                                                                                                                                                    |
| 1983 | Q8TED6           | 4                    | 4              | 15.5                  | 245    | 28043 | 7   | Carboxymethylenebutenolidase homolog                                                                                                                                                                                                                                   |
| 1983 | Q96DG6           | 4                    | 4              | 15.5                  | 245    | 28048 | 7.2 | Carboxymethylenebutenolidase homolog                                                                                                                                                                                                                                   |
| 1984 | Q9H1E5           | 4                    | 8              | 15.5                  | 349    | 38952 | 4.4 | Thioredoxin domain-containing protein 13 precursor                                                                                                                                                                                                                     |
| 1985 | Q9Y2Z4           | 4                    | 4              | 15.5                  | 477    | 53199 | 9   | Tyrosyl-tRNA synthetase, mitochondrial precursor                                                                                                                                                                                                                       |
| 1986 | Q9Y316           | 4                    | 7              | 15.5                  | 297    | 33733 | 7.2 | Protein memo                                                                                                                                                                                                                                                           |
| 1986 | Q5R2V8           | 4                    | 7              | 15.3                  | 300    | 34294 | 7.3 | Chromosome 2 open reading frame 4 short form                                                                                                                                                                                                                           |
| 1987 | Q99536           | 4                    | 4              | 15.3                  | 393    | 41920 | 6.3 | Synaptic vesicle membrane protein VAT-1 homolog                                                                                                                                                                                                                        |

| No.  | Accession Number | Unique Peptide Count | Spectrum Count | Sequence Coverage (%) | Length | MolWt | pI   | Descriptive Name                                                                                                                                                |
|------|------------------|----------------------|----------------|-----------------------|--------|-------|------|-----------------------------------------------------------------------------------------------------------------------------------------------------------------|
| 1988 | Q96KB5           | 4                    | 6              | 15.2                  | 322    | 36085 | 5.1  | T-lymphokine-activated killer cell-originated protein kinase                                                                                                    |
| 1989 | P16403           | 4                    | 106            | 15.5                  | 213    | 21365 | 10.9 | Histone H1.2                                                                                                                                                    |
| 1989 | A3R0T7           | 4                    | 106            | 15.1                  | 219    | 21879 | 11   | Liver histone H1e                                                                                                                                               |
| 1989 | Q4VB24           | 4                    | 106            | 15.1                  | 219    | 21893 | 11   | Histone cluster 1, H1e                                                                                                                                          |
| 1989 | P10412           | 4                    | 106            | 15.1                  | 219    | 21865 | 11   | Histone H1.4                                                                                                                                                    |
| 1989 | P16402           | 4                    | 106            | 14.9                  | 221    | 22350 | 11   | Histone H1.3                                                                                                                                                    |
| 1990 | Q6UXH1-4         | 4                    | 6              | 16.3                  | 325    | 35288 | 4.7  | Isoform 4 of Q6UXH1                                                                                                                                             |
| 1990 | Q6UXH1           | 4                    | 6              | 15                    | 353    | 38192 | 4.6  | Cysteine-rich with EGF-like domain protein 2 precursor                                                                                                          |
| 1990 | Q6UXH1-6         | 4                    | 6              | 14.2                  | 373    | 40491 | 4.8  | Isoform 6 of Q6UXH1                                                                                                                                             |
| 1990 | Q6UXH1-5         | 4                    | 6              | 13.2                  | 402    | 43579 | 4.8  | Isoform 5 of Q6UXH1                                                                                                                                             |
| 1991 | Q9UNE7           | 4                    | 5              | 14.9                  | 303    | 34856 | 5.9  | STIP1 homology and U box-containing protein 1                                                                                                                   |
| 1992 | Q5JTA8           | 4                    | 27             | 14.8                  | 250    | 28743 | 10   | Novel protein                                                                                                                                                   |
| 1992 | Q9H0U3           | 4                    | 27             | 11                    | 335    | 38037 | 9.6  | Implantation-associated protein precursor                                                                                                                       |
| 1993 | Q5T8A0           | 4                    | 5              | 14.8                  | 270    | 30479 | 9.6  | Mitochondrial ribosomal protein S2                                                                                                                              |
| 1993 | Q9Y399           | 4                    | 5              | 13.5                  | 296    | 33249 | 9.3  | Mitochondrial 28S ribosomal protein S2                                                                                                                          |
| 1994 | O75792           | 4                    | 5              | 14.7                  | 299    | 33395 | 5.3  | Ribonuclease H2 subunit A (EC 3.1.26.4) (RNase H2 subunit A) (Ribonuclease HI subunit A) (Ribonuclease HI large subunit) (RNase HI large subunit) (RNase H(35)) |
| 1994 | Q6UQL6           | 4                    | 5              | 14.7                  | 299    | 33425 | 5.2  | Ribonuclease H2                                                                                                                                                 |
| 1994 | Q6IBG3           | 4                    | 5              | 14.7                  | 299    | 33353 | 5.3  | JUNB protein                                                                                                                                                    |
| 1995 | Q00059           | 4                    | 6              | 14.6                  | 246    | 29097 | 9.7  | Transcription factor A, mitochondrial precursor                                                                                                                 |
| 1995 | Q6LES8           | 4                    | 6              | 14.6                  | 246    | 29083 | 9.7  | TFAM protein                                                                                                                                                    |
| 1996 | Q8IUI5           | 4                    | 30             | 14.7                  | 361    | 42908 | 9    | PTPLAD1 protein                                                                                                                                                 |
| 1996 | Q6PD63           | 4                    | 30             | 14.6                  | 362    | 43160 | 8.9  | Protein tyrosine phosphatase-like A domain containing 1                                                                                                         |
| 1996 | Q96T12           | 4                    | 30             | 14.6                  | 362    | 43159 | 9.1  | CDNA FLJ14515 fis, clone NT2RM1000800, weakly similar to Mus musculus partial B-IND1 protein                                                                    |
| 1996 | Q8NC86           | 4                    | 30             | 14.6                  | 362    | 43126 | 8.9  | CDNA FLJ90417 fis, clone NT2RP3000171, weakly similar to Mus musculus partial B-IND1 protein                                                                    |
| 1996 | Q9NQA7           | 4                    | 30             | 14.3                  | 370    | 43543 | 8    | B-ind1 protein                                                                                                                                                  |
| 1996 | UPI0000D61358    | 4                    | 30             | 14.2                  | 373    | 44323 | 9.2  | butyrate-induced transcript 1                                                                                                                                   |
| 1996 | Q9P035           | 4                    | 30             | 14.2                  | 373    | 44423 | 9.1  | Protein-tyrosine phosphatase-like A domain-containing protein 1                                                                                                 |
| 1997 | Q9BYN8           | 4                    | 5              | 14.6                  | 205    | 24212 | 10.4 | 28S ribosomal protein S26, mitochondrial precursor                                                                                                              |
| 1998 | P08397           | 4                    | 10             | 14.4                  | 361    | 39330 | 7.2  | Porphobilinogen deaminase                                                                                                                                       |
| 1999 | Q14318           | 4                    | 9              | 14.4                  | 355    | 38408 | 7.7  | FK506-binding protein 8                                                                                                                                         |
| 1999 | Q86YK6           | 4                    | 9              | 12.4                  | 412    | 44562 | 4.8  | FK506-binding protein 38                                                                                                                                        |
| 1999 | UPI000020376E    | 4                    | 9              | 12.3                  | 413    | 44649 | 4.8  | FK506-binding protein 8                                                                                                                                         |
| 1999 | Q7Z349           | 4                    | 9              | 11.3                  | 451    | 48636 | 5    | Hypothetical protein DKFZp686M22160                                                                                                                             |
| 2000 | Q2LE81           | 4                    | 5              | 16.4                  | 244    | 25882 | 9.2  | NADP(H)-dependent retinol dehydrogenase/reductase B1 isoform                                                                                                    |
| 2000 | Q9BTZ2           | 4                    | 5              | 15.4                  | 260    | 27572 | 7.8  | Dehydrogenase/reductase SDR family member 4                                                                                                                     |
| 2000 | Q20CR0           | 4                    | 5              | 14.4                  | 278    | 29537 | 8.5  | NADP(H)-dependent retinol dehydrogenase/reductase short isoform                                                                                                 |
| 2000 | Q71UQ6           | 4                    | 5              | 14.4                  | 278    | 29531 | 8.5  | Hep27-like protein                                                                                                                                              |
| 2001 | Q6IBT1           | 4                    | 43             | 14.4                  | 277    | 29937 | 7.7  | Proteasome subunit beta type                                                                                                                                    |
| 2001 | Q99436           | 4                    | 43             | 14.4                  | 277    | 29965 | 7.7  | Proteasome subunit beta type 7 precursor                                                                                                                        |
| 2001 | Q86U62           | 4                    | 43             | 14.4                  | 277    | 30018 | 8    | Proteasome (Prosome, macropain) subunit, beta type, 7                                                                                                           |
| 2002 | Q8N474           | 4                    | 5              | 14.3                  | 314    | 35386 | 8.9  | Secreted frizzled-related protein 1 precursor                                                                                                                   |
| 2003 | Q9NYK5           | 4                    | 4              | 13.9                  | 338    | 38722 | 7.6  | Mitochondrial 39S ribosomal protein L39                                                                                                                         |
| 2003 | UPI00001AEE66    | 4                    | 4              | 13.9                  | 338    | 38712 | 7.6  | Mitochondrial 39S ribosomal protein L39 (L39mt) (MRP-L39) (MRP-L5).                                                                                             |
| 2003 | UPI00001AEAC0    | 4                    | 4              | 13.3                  | 353    | 40458 | 7.9  | Mitochondrial 39S ribosomal protein L39 (L39mt) (MRP-L39) (MRP-L5).                                                                                             |
| 2003 | Q9NYK5-2         | 4                    | 4              | 13.3                  | 353    | 40468 | 7.9  | Isoform 2 of Q9NYK5                                                                                                                                             |
| 2004 | P48509           | 4                    | 40             | 13.8                  | 253    | 28295 | 7.5  | CD151 antigen                                                                                                                                                   |
| 2005 | P53582           | 4                    | 5              | 13.7                  | 386    | 43215 | 7.2  | Methionine aminopeptidase 1                                                                                                                                     |
| 2006 | Q53GE7           | 4                    | 4              | 13.7                  | 292    | 33595 | 4.9  | Tetratricopeptide repeat domain 1 variant                                                                                                                       |
| 2006 | Q99614           | 4                    | 4              | 13.7                  | 292    | 33526 | 4.8  | Tetratricopeptide repeat protein 1                                                                                                                              |
| 2006 | Q53HD9           | 4                    | 4              | 13.7                  | 292    | 33454 | 4.9  | Tetratricopeptide repeat domain 1 variant                                                                                                                       |
| 2007 | Q8IZ81           | 4                    | 8              | 13.7                  | 293    | 34961 | 8.1  | ELMO domain-containing protein 2                                                                                                                                |
| 2008 | P49903           | 4                    | 4              | 13.3                  | 392    | 42911 | 6    | Selenide, water dikinase 1                                                                                                                                      |
| 2009 | P09001           | 4                    | 6              | 13.2                  | 348    | 38633 | 9.5  | Mitochondrial 39S ribosomal protein L3                                                                                                                          |
| 2010 | Q86W42-2         | 4                    | 6              | 14.2                  | 317    | 34849 | 7.4  | Isoform 2 of Q86W42                                                                                                                                             |
| 2010 | Q86W42           | 4                    | 6              | 13.2                  | 341    | 37535 | 7.4  | THO complex subunit 6 homolog                                                                                                                                   |
| 2011 | Q9UN52           | 4                    | 6              | 13.2                  | 423    | 47873 | 6.7  | COP9 signalosome complex subunit 3                                                                                                                              |
| 2012 | Q7L5N1           | 4                    | 14             | 13.1                  | 327    | 36163 | 5.7  | COP9 signalosome complex subunit 6                                                                                                                              |
| 2013 | Q9Y680-2         | 4                    | 5              | 15.3                  | 222    | 25794 | 6.3  | Isoform 2 of Q9Y680                                                                                                                                             |
| 2013 | UPI0000456EAC    | 4                    | 5              | 13.3                  | 256    | 29688 | 6.5  | FK506-binding protein 7 precursor (EC 5.2.1.8) (Peptidyl-prolyl cis- trans isomerase) (PPLase) (Rotamase) (FKBP-23).                                            |
| 2013 | Q9Y680           | 4                    | 5              | 13.1                  | 259    | 30009 | 6.5  | FK506-binding protein 7 precursor                                                                                                                               |
| 2014 | P50148           | 4                    | 5              | 13                    | 353    | 41467 | 5.8  | Guanine nucleotide-binding protein G(q) subunit alpha                                                                                                           |



| No.  | Accession Number | Unique Peptide Count | Spectrum Count | Sequence Coverage (%) | Length | MolWt  | pI   | Descriptive Name                                                                                                                                                                                 |
|------|------------------|----------------------|----------------|-----------------------|--------|--------|------|--------------------------------------------------------------------------------------------------------------------------------------------------------------------------------------------------|
| 2014 | Q6NT27           | 4                    | 5              | 12.8                  | 359    | 42142  | 5.7  | Guanine nucleotide binding protein (G protein), q polypeptide                                                                                                                                    |
| 2015 | O94766           | 4                    | 6              | 12.8                  | 335    | 37122  | 8.3  | Galactosylgalactosylxylosylprotein 3-beta-glucuronosyltransferase 3                                                                                                                              |
| 2015 | Q5U676           | 4                    | 6              | 12.6                  | 341    | 37828  | 8.6  | B3GAT3 protein                                                                                                                                                                                   |
| 2016 | P06280           | 4                    | 5              | 12.8                  | 429    | 48767  | 5.6  | Alpha-galactosidase A precursor                                                                                                                                                                  |
| 2016 | Q53HF3           | 4                    | 5              | 12.8                  | 429    | 48753  | 5.6  | Galactosidase, alpha variant                                                                                                                                                                     |
| 2017 | Q9BVC6           | 4                    | 42             | 12.8                  | 243    | 26210  | 10.5 | Transmembrane protein 109 precursor                                                                                                                                                              |
| 2018 | UPI0000457335    | 4                    | 14             | 19.4                  | 304    | 32825  | 5.6  | proline-rich coiled-coil 1                                                                                                                                                                       |
| 2018 | Q8NEZ7           | 4                    | 14             | 19.3                  | 305    | 32896  | 5.6  | FLJ00410 protein                                                                                                                                                                                 |
| 2018 | Q96M27           | 4                    | 14             | 13.3                  | 445    | 46701  | 5.8  | CDNA FLJ32875 fis, clone TESTI2004031                                                                                                                                                            |
| 2018 | Q8IVL4           | 4                    | 14             | 12.8                  | 462    | 48907  | 5.3  | Hypothetical protein                                                                                                                                                                             |
| 2018 | Q86Y42           | 4                    | 14             | 12.7                  | 464    | 48525  | 5.4  | Proline-rich coiled-coil protein 1                                                                                                                                                               |
| 2018 | UPI0000D61673    | 4                    | 14             | 12.7                  | 466    | 48637  | 5.5  | proline-rich coiled-coil 1                                                                                                                                                                       |
| 2019 | Q9BRJ2           | 4                    | 8              | 12.7                  | 306    | 35351  | 9    | 39S ribosomal protein L45, mitochondrial precursor                                                                                                                                               |
| 2019 | UPI00001AEFFB    | 4                    | 8              | 12.7                  | 306    | 35243  | 9    | mitochondrial ribosomal protein L45                                                                                                                                                              |
| 2020 | Q9BV38           | 4                    | 6              | 12.7                  | 432    | 47405  | 6.7  | WD repeat protein 18                                                                                                                                                                             |
| 2021 | Q13620           | 4                    | 8              | 12.6                  | 895    | 102299 | 7.9  | Cullin-4B                                                                                                                                                                                        |
| 2021 | UPI000059DB7F    | 4                    | 8              | 12.6                  | 900    | 102756 | 8    | Cullin-4B (CUL-4B).                                                                                                                                                                              |
| 2021 | Q5JRZ4           | 4                    | 8              | 12.4                  | 913    | 103982 | 7.4  | Cullin 4B                                                                                                                                                                                        |
| 2022 | Q8N6T3-3         | 4                    | 5              | 12.9                  | 396    | 43776  | 8.5  | Isoform 3 of Q8N6T3                                                                                                                                                                              |
| 2022 | Q8N6T3           | 4                    | 5              | 12.6                  | 406    | 44668  | 5.7  | ADP-ribosylation factor GTPase-activating protein 1                                                                                                                                              |
| 2022 | Q8N6T3-2         | 4                    | 5              | 12.3                  | 414    | 45676  | 5.8  | Isoform 2 of Q8N6T3                                                                                                                                                                              |
| 2023 | Q6PKC2           | 4                    | 13             | 22.5                  | 236    | 27016  | 8.2  | CROP protein                                                                                                                                                                                     |
| 2023 | Q86Y74           | 4                    | 13             | 21.1                  | 251    | 28926  | 7    | CROP protein                                                                                                                                                                                     |
| 2023 | O95232           | 4                    | 13             | 12.3                  | 432    | 51466  | 9.8  | Cisplatin resistance-associated overexpressed protein                                                                                                                                            |
| 2024 | O00115           | 4                    | 6              | 12.2                  | 360    | 39581  | 8    | Deoxyribonuclease-2-alpha precursor                                                                                                                                                              |
| 2025 | Q86U79           | 4                    | 5              | 12.8                  | 345    | 38737  | 6.7  | Adenosine kinase                                                                                                                                                                                 |
| 2025 | Q5VXR3           | 4                    | 5              | 12.8                  | 345    | 38703  | 6.7  | Adenosine kinase                                                                                                                                                                                 |
| 2025 | P55263           | 4                    | 5              | 12.2                  | 362    | 40545  | 6.7  | Adenosine kinase                                                                                                                                                                                 |
| 2026 | Q14376           | 4                    | 7              | 12.1                  | 348    | 38282  | 6.7  | UDP-glucose 4-epimerase                                                                                                                                                                          |
| 2027 | Q9UNQ2           | 4                    | 4              | 12.1                  | 313    | 35236  | 10   | Probable dimethyladenosine transferase (EC 2.1.1.-) (S-adenosylmethionine-6-N',N'-adenosyl(rRNA) dimethyltransferase)                                                                            |
| 2028 | Q8N684-2         | 4                    | 4              | 12.1                  | 462    | 51096  | 7.8  | Isoform 2 of Q8N684                                                                                                                                                                              |
| 2028 | Q8N684           | 4                    | 4              | 11.9                  | 471    | 52050  | 8    | Cleavage and polyadenylation specificity factor 7                                                                                                                                                |
| 2029 | Q9Y6G9           | 4                    | 10             | 11.9                  | 523    | 56579  | 6.4  | Cytoplasmic dynein 1 light intermediate chain 1                                                                                                                                                  |
| 2029 | UPI000006E91C    | 4                    | 10             | 11.9                  | 523    | 56627  | 6.6  | dynein light chain-A                                                                                                                                                                             |
| 2030 | P11182           | 4                    | 4              | 11.8                  | 482    | 53487  | 8.5  | Lipoamide acyltransferase component of branched-chain alpha-keto acid dehydrogenase complex, mitochondrial precursor (EC 2.3.1.168) (Dihydrolipoyllysine-residue (2-methylpropanoyl)transferase) |
| 2030 | Q5VVL8           | 4                    | 4              | 11.8                  | 482    | 53517  | 8.5  | Dihydrolipamide branched chain transacylase E2                                                                                                                                                   |
| 2031 | O75351           | 4                    | 7              | 11.7                  | 444    | 49302  | 7.2  | Vacuolar protein sorting-associating protein 4B (Suppressor of K(+) transport growth defect 1)                                                                                                   |
| 2032 | Q86X76-4         | 4                    | 6              | 12.2                  | 312    | 34323  | 7.4  | Isoform 5 of Q86X76                                                                                                                                                                              |
| 2032 | Q86X76           | 4                    | 6              | 11.6                  | 327    | 35896  | 7.7  | Nitrilase homolog 1                                                                                                                                                                              |
| 2032 | Q86X76-3         | 4                    | 6              | 10.4                  | 367    | 40200  | 6.9  | Isoform 4 of Q86X76                                                                                                                                                                              |
| 2033 | Q15428           | 4                    | 9              | 11.9                  | 464    | 49256  | 9.6  | Splicing factor 3A subunit 2                                                                                                                                                                     |
| 2033 | Q05DF2           | 4                    | 9              | 11.4                  | 481    | 51476  | 10.1 | SF3A2 protein                                                                                                                                                                                    |
| 2034 | O15554           | 4                    | 8              | 11.2                  | 427    | 47696  | 9.8  | Intermediate conductance calcium-activated potassium channel protein 4                                                                                                                           |
| 2035 | Q13572-2         | 4                    | 4              | 14.6                  | 314    | 35632  | 5.7  | Isoform 2 of Q13572                                                                                                                                                                              |
| 2035 | UPI0000F0E9AF    | 4                    | 4              | 14                    | 328    | 37047  | 5.7  | Inositol-tetrakisphosphate 1-kinase                                                                                                                                                              |
| 2035 | Q13572           | 4                    | 4              | 11.1                  | 414    | 45621  | 6.2  | Inositol-tetrakisphosphate 1-kinase (EC 2.7.1.134) (Inositol- triphosphate 5/6-kinase) (EC 2.7.1.159) (Inositol 1,3,4-trisphosphate 5/6-kinase) (Ins(1,3,4)P(3) 5/6-kinase)                      |
| 2036 | Q12849-3         | 4                    | 11             | 11.8                  | 415    | 47041  | 5.6  | Isoform 3 of Q12849                                                                                                                                                                              |
| 2036 | UPI0000457223    | 4                    | 11             | 11.6                  | 422    | 47545  | 5.6  | G-rich sequence factor 1 (GRSF-1).                                                                                                                                                               |
| 2036 | Q12849-2         | 4                    | 11             | 11.6                  | 424    | 47981  | 5.6  | Isoform 2 of Q12849                                                                                                                                                                              |
| 2036 | Q12849           | 4                    | 11             | 11                    | 447    | 50170  | 6    | G-rich sequence factor 1                                                                                                                                                                         |
| 2036 | UPI0000D61572    | 4                    | 11             | 11                    | 446    | 49970  | 6    | G-rich sequence factor 1 (GRSF-1).                                                                                                                                                               |
| 2037 | Q8WXI9           | 4                    | 5              | 11                    | 593    | 65261  | 9.7  | Transcriptional repressor p66 beta                                                                                                                                                               |
| 2038 | Q9BRP4-2         | 4                    | 4              | 11.5                  | 375    | 40439  | 6.7  | Isoform 2 of Q9BRP4                                                                                                                                                                              |
| 2038 | Q9BRP4           | 4                    | 4              | 11                    | 392    | 42190  | 6.3  | WD repeat protein 71                                                                                                                                                                             |
| 2038 | UPI0000D6264F    | 4                    | 4              | 10.9                  | 394    | 42374  | 6.3  | WD repeat protein 71 (Protein G-16).                                                                                                                                                             |
| 2039 | UPI0000140FE5    | 4                    | 7              | 11.5                  | 453    | 49612  | 9.4  | DnaJ homolog subfamily A member 3, mitochondrial precursor (Tumorous imaginal discs protein Tid56 homolog) (DnaJ protein Tid-1) (hTid-1).                                                        |
| 2039 | Q96EY1-2         | 4                    | 7              | 11.5                  | 453    | 49661  | 9.4  | Isoform 2 of Q96EY1                                                                                                                                                                              |
| 2039 | Q53G26           | 4                    | 7              | 10.8                  | 480    | 52489  | 9.3  | DnaJ (Hsp40) homolog, subfamily A, member 3 variant                                                                                                                                              |
| 2039 | Q96EY1           | 4                    | 7              | 10.8                  | 480    | 52538  | 9.3  | DnaJ homolog subfamily A member 3, mitochondrial precursor                                                                                                                                       |
| 2040 | UPI000013DC30    | 4                    | 4              | 10.9                  | 617    | 67723  | 8.6  | decapping enzyme Dcp1b                                                                                                                                                                           |
| 2040 | Q8IZD4           | 4                    | 4              | 10.8                  | 618    | 67851  | 8.6  | mRNA-decapping enzyme 1B                                                                                                                                                                         |

| No.  | Accession Number | Unique Peptide Count | Spectrum Count | Sequence Coverage (%) | Length | MolWt | pI  | Descriptive Name                                                                                                                                                                                    |
|------|------------------|----------------------|----------------|-----------------------|--------|-------|-----|-----------------------------------------------------------------------------------------------------------------------------------------------------------------------------------------------------|
| 2041 | P82675           | 4                    | 5              | 10.7                  | 430    | 48006 | 9.9 | Mitochondrial 28S ribosomal protein S5                                                                                                                                                              |
| 2042 | Q5SXB7           | 4                    | 4              | 10.7                  | 328    | 36437 | 8   | ATP synthase mitochondrial F1 complex assembly factor 1                                                                                                                                             |
| 2042 | Q9H6E3           | 4                    | 4              | 10.7                  | 328    | 36407 | 8   | CDNA: FLJ22351 fis, clone HRC06325                                                                                                                                                                  |
| 2043 | Q9H9J5           | 4                    | 6              | 10.6                  | 521    | 59844 | 6   | CDNA FLJ12694 fis, clone NT2RP1000358, highly similar to Homo sapiens mRNA; cDNA DKFZp564C186                                                                                                       |
| 2043 | UPI000041820C    | 4                    | 6              | 7.3                   | 749    | 84919 | 5.6 | Nucleolar complex protein 2 homolog (Protein NOC2 homolog) (NOC2- like).                                                                                                                            |
| 2043 | UPI0000161C39    | 4                    | 6              | 7.3                   | 749    | 84878 | 5.5 | nucleolar complex associated 2 homolog                                                                                                                                                              |
| 2043 | Q9Y3T9           | 4                    | 6              | 7.3                   | 749    | 84905 | 5.6 | Nucleolar complex protein 2 homolog                                                                                                                                                                 |
| 2044 | O43639           | 4                    | 5              | 10.5                  | 380    | 42915 | 7   | Cytoplasmic protein NCK2                                                                                                                                                                            |
| 2045 | Q6ZVM7           | 4                    | 7              | 10.5                  | 507    | 55556 | 4.8 | TOM1-like protein 2                                                                                                                                                                                 |
| 2046 | Q6IBT5           | 4                    | 4              | 10.4                  | 415    | 45493 | 5.9 | NEU1 protein                                                                                                                                                                                        |
| 2046 | Q99519           | 4                    | 4              | 10.4                  | 415    | 45467 | 5.9 | Sialidase-1 precursor                                                                                                                                                                               |
| 2047 | Q8TB61-2         | 4                    | 35             | 11.5                  | 392    | 42967 | 9.4 | Isoform 2 of Q8TB61                                                                                                                                                                                 |
| 2047 | UPI000049E047    | 4                    | 35             | 11.4                  | 394    | 43130 | 9.4 | Adenosine 3'-phospho 5'-phosphosulfate transporter 1 (PAPS transporter 1) (Solute carrier family 35 member B2) (Putative MAPK-activating protein PM15) (Putative NF-kappa-B-activating protein 48). |
| 2047 | Q8TB61           | 4                    | 35             | 10.4                  | 432    | 47515 | 9.2 | Adenosine 3'-phospho 5'-phosphosulfate transporter 1                                                                                                                                                |
| 2048 | UPI0000F5345A    | 4                    | 6              | 20                    | 260    | 28847 | 5.7 | U4/U6 small nuclear ribonucleoprotein Prp31                                                                                                                                                         |
| 2048 | Q8WWY3-3         | 4                    | 6              | 18.7                  | 278    | 30966 | 8.1 | Isoform 3 of Q8WWY3                                                                                                                                                                                 |
| 2048 | UPI0000140A41    | 4                    | 6              | 14.3                  | 364    | 40749 | 5.1 | U4/U6 small nuclear ribonucleoprotein Prp31 (Pre-mRNA-processing factor 31) (U4/U6 snRNP 61 kDa protein) (hPrp31) (Protein 61K) (Serologically defined breast cancer antigen NY-BR-99).             |
| 2048 | Q8WWY3-2         | 4                    | 6              | 14.3                  | 364    | 40779 | 5.1 | Isoform 2 of Q8WWY3                                                                                                                                                                                 |
| 2048 | Q8WWY3           | 4                    | 6              | 10.4                  | 499    | 55456 | 5.8 | U4/U6 small nuclear ribonucleoprotein Prp31                                                                                                                                                         |
| 2048 | UPI0000072864    | 4                    | 6              | 10.4                  | 499    | 55442 | 5.8 | pre-mRNA processing factor 31 homolog                                                                                                                                                               |
| 2049 | Q9BWS9-3         | 4                    | 6              | 11.3                  | 362    | 41678 | 8.6 | Isoform 3 of Q9BWS9                                                                                                                                                                                 |
| 2049 | Q9BWS9           | 4                    | 6              | 10.4                  | 393    | 44941 | 8.6 | Chitinase domain-containing protein 1 precursor                                                                                                                                                     |
| 2049 | UPI000006DA84    | 4                    | 6              | 10.4                  | 393    | 44883 | 8.8 | chitinase domain containing 1                                                                                                                                                                       |
| 2050 | UPI0000208801    | 4                    | 13             | 11.2                  | 437    | 45880 | 5.6 | trans-golgi network protein 2                                                                                                                                                                       |
| 2050 | Q96QL2           | 4                    | 13             | 11.2                  | 437    | 45866 | 5.6 | Trans-golgi network protein 2                                                                                                                                                                       |
| 2050 | Q53GV2           | 4                    | 13             | 11.2                  | 437    | 45850 | 5.6 | Trans-golgi network protein 2 variant                                                                                                                                                               |
| 2050 | Q53G68           | 4                    | 13             | 11.2                  | 437    | 45936 | 5.5 | Trans-golgi network protein 2 variant                                                                                                                                                               |
| 2050 | O43493-2         | 4                    | 13             | 11.2                  | 437    | 45774 | 5.6 | Isoform TGN46 of O43493                                                                                                                                                                             |
| 2050 | Q8N6T8           | 4                    | 13             | 11                    | 447    | 47058 | 5.6 | TGOLN2 protein                                                                                                                                                                                      |
| 2050 | UPI000020880A    | 4                    | 13             | 10.8                  | 453    | 47774 | 6   | Trans-Golgi network integral membrane protein 2 precursor (Trans-Golgi network protein TGN51) (TGN46) (TGN48) (TGN38 homolog).                                                                      |
| 2050 | O43493-3         | 4                    | 13             | 10.8                  | 453    | 47592 | 6   | Isoform TGN48 of O43493                                                                                                                                                                             |
| 2050 | O43493           | 4                    | 13             | 10.2                  | 480    | 51007 | 5.7 | Trans-Golgi network integral membrane protein 2 precursor                                                                                                                                           |
| 2051 | Q9UJW0           | 4                    | 6              | 10.2                  | 460    | 52337 | 7.3 | Dynactin subunit 4                                                                                                                                                                                  |
| 2052 | Q6UWP7           | 4                    | 8              | 10.1                  | 414    | 48920 | 8.6 | Lysocardiolipin acyltransferase                                                                                                                                                                     |
| 2053 | Q7L9G1           | 4                    | 8              | 10                    | 560    | 61988 | 9.4 | CDNA FLJ12541 fis, clone NT2RM4000433, moderately similar to Mus musculus retinoic acid-responsive protein (Stra6) mRNA                                                                             |
| 2053 | Q9BX78           | 4                    | 8              | 8.5                   | 658    | 72583 | 9.1 | STRA6 isoform 2                                                                                                                                                                                     |
| 2053 | Q9BX79           | 4                    | 8              | 8.4                   | 667    | 73503 | 9   | STRA6 isoform 1                                                                                                                                                                                     |
| 2053 | Q8TB21           | 4                    | 8              | 8.4                   | 667    | 73533 | 9   | Stimulated by retinoic acid gene 6 homolog                                                                                                                                                          |
| 2054 | Q59H65           | 4                    | 8              | 10.4                  | 461    | 51892 | 6.8 | Aldehyde dehydrogenase 3A2 variant                                                                                                                                                                  |
| 2054 | P51648           | 4                    | 8              | 9.9                   | 485    | 54848 | 7.9 | Fatty aldehyde dehydrogenase                                                                                                                                                                        |
| 2054 | P51648-2         | 4                    | 8              | 9.4                   | 508    | 57669 | 8.9 | Isoform 2 of P51648                                                                                                                                                                                 |
| 2055 | Q2L9C1           | 4                    | 5              | 9.9                   | 534    | 54823 | 7.7 | Dha kinase/FMN cyclase splice variant                                                                                                                                                               |
| 2055 | UPI00000718B9    | 4                    | 5              | 9.2                   | 575    | 58947 | 7.5 | dihydroxyacetone kinase 2                                                                                                                                                                           |
| 2055 | Q3LXA3           | 4                    | 5              | 9.2                   | 575    | 58977 | 7.5 | Dihydroxyacetone kinase                                                                                                                                                                             |
| 2056 | Q16822           | 4                    | 7              | 9.7                   | 640    | 70637 | 7.6 | Phosphoenolpyruvate carboxykinase [GTP], mitochondrial precursor                                                                                                                                    |
| 2056 | UPI000013C708    | 4                    | 7              | 9.7                   | 640    | 70730 | 7.6 | mitochondrial phosphoenolpyruvate carboxykinase 2 isoform 1 precursor                                                                                                                               |
| 2056 | Q6IB91           | 4                    | 7              | 9.7                   | 640    | 70697 | 7.6 | PCK2 protein                                                                                                                                                                                        |
| 2057 | Q5T160           | 4                    | 4              | 9.7                   | 578    | 65505 | 8.2 | Probable arginyl-tRNA synthetase, mitochondrial precursor                                                                                                                                           |
| 2058 | Q6P1A2           | 4                    | 8              | 9.7                   | 487    | 56035 | 8.7 | Membrane-bound O-acyltransferase domain-containing protein 5                                                                                                                                        |
| 2059 | O00330           | 4                    | 7              | 9.6                   | 501    | 54122 | 8.7 | Pyruvate dehydrogenase protein X component, mitochondrial precursor                                                                                                                                 |
| 2059 | UPI0000168268    | 4                    | 7              | 9.6                   | 501    | 54208 | 8.8 | pyruvate dehydrogenase complex, component X                                                                                                                                                         |
| 2060 | P31749           | 4                    | 6              | 9.6                   | 480    | 55686 | 6.1 | RAC-alpha serine/threonine-protein kinase                                                                                                                                                           |
| 2061 | Q5T8B5           | 4                    | 7              | 9.6                   | 571    | 59481 | 8.6 | Interferon regulatory factor 2 binding protein 2                                                                                                                                                    |
| 2061 | Q5T8B6           | 4                    | 7              | 9.4                   | 587    | 61025 | 8.7 | Interferon regulatory factor 2-binding protein 2                                                                                                                                                    |
| 2062 | Q5VTA2           | 4                    | 9              | 9.6                   | 490    | 55999 | 5.1 | Fas (TNFRSF6) associated factor 1                                                                                                                                                                   |
| 2062 | UPI0000D61F14    | 4                    | 9              | 9.4                   | 498    | 57040 | 5.1 | FAS-associated factor 1 (Protein FAF1) (hFAF1).                                                                                                                                                     |
| 2062 | Q9UNN5-2         | 4                    | 9              | 9.4                   | 498    | 56934 | 5.1 | Isoform Short of Q9UNN5                                                                                                                                                                             |
| 2062 | Q9UNN5           | 4                    | 9              | 7.2                   | 650    | 73954 | 4.9 | FAS-associated factor 1                                                                                                                                                                             |

| No.  | Accession Number | Unique Peptide Count | Spectrum Count | Sequence Coverage (%) | Length | MolWt  | pI  | Descriptive Name                                                                                                                                                                                                                                                                                                        |
|------|------------------|----------------------|----------------|-----------------------|--------|--------|-----|-------------------------------------------------------------------------------------------------------------------------------------------------------------------------------------------------------------------------------------------------------------------------------------------------------------------------|
| 2063 | UPI0000457066    | 4                    | 19             | 10.3                  | 600    | 62508  | 9.4 | RNA-binding protein EWS (EWS oncogene) (Ewing sarcoma breakpoint region 1 protein).                                                                                                                                                                                                                                     |
| 2063 | Q96MN4           | 4                    | 19             | 10.3                  | 600    | 62478  | 9.4 | CDNA FLJ32119 fis, clone PEBLM1000034, highly similar to RNA-BINDING PROTEIN EWS                                                                                                                                                                                                                                        |
| 2063 | Q01844           | 4                    | 19             | 9.5                   | 656    | 68478  | 9.3 | RNA-binding protein EWS                                                                                                                                                                                                                                                                                                 |
| 2063 | Q96FE8           | 4                    | 19             | 9.5                   | 655    | 68391  | 9.3 | Ewing sarcoma breakpoint region 1                                                                                                                                                                                                                                                                                       |
| 2063 | Q96MX4           | 4                    | 19             | 9.4                   | 661    | 68966  | 9.3 | CDNA FLJ31747 fis, clone NT2RI2007377, highly similar to RNA-BINDING PROTEIN EWS                                                                                                                                                                                                                                        |
| 2064 | O95219           | 4                    | 7              | 9.3                   | 450    | 51909  | 6   | Sorting nexin-4                                                                                                                                                                                                                                                                                                         |
| 2065 | P13473           | 4                    | 94             | 9.3                   | 410    | 44961  | 5.6 | Lysosome-associated membrane glycoprotein 2 precursor                                                                                                                                                                                                                                                                   |
| 2065 | Q9UD93           | 4                    | 94             | 9.3                   | 410    | 45043  | 5.9 | Lysosomal membrane glycoprotein LAMP-2 homolog                                                                                                                                                                                                                                                                          |
| 2065 | P13473-2         | 4                    | 94             | 9.3                   | 410    | 44956  | 5.7 | Isoform LAMP                                                                                                                                                                                                                                                                                                            |
| 2065 | Q6Q3G8           | 4                    | 94             | 9.2                   | 411    | 45170  | 5.9 | Lysosomal-associated membrane protein 2C                                                                                                                                                                                                                                                                                |
| 2066 | P31146           | 4                    | 4              | 9.3                   | 461    | 51026  | 6.7 | Coronin-1A                                                                                                                                                                                                                                                                                                              |
| 2067 | Q5T6K6           | 4                    | 7              | 16.5                  | 254    | 28450  | 5.7 | Nuclear transcription factor Y, gamma                                                                                                                                                                                                                                                                                   |
| 2067 | Q5T6K9           | 4                    | 7              | 14                    | 301    | 33702  | 5.1 | Nuclear transcription factor Y, gamma                                                                                                                                                                                                                                                                                   |
| 2067 | UPI0000D61EEA    | 4                    | 7              | 13.4                  | 313    | 34243  | 6.4 | Nuclear transcription factor Y subunit gamma (Nuclear transcription factor Y subunit C) (NF-YC) (CAAT-box DNA-binding protein subunit C) (Transactivator HSM-1/2).                                                                                                                                                      |
| 2067 | Q5T6K5           | 4                    | 7              | 13.4                  | 313    | 34213  | 6.4 | Nuclear transcription factor Y, gamma                                                                                                                                                                                                                                                                                   |
| 2067 | Q13952-2         | 4                    | 7              | 12.5                  | 335    | 37194  | 5   | Isoform 1 of Q13952                                                                                                                                                                                                                                                                                                     |
| 2067 | Q59GY4           | 4                    | 7              | 11.1                  | 378    | 41595  | 6.1 | Nuclear transcription factor Y, gamma variant                                                                                                                                                                                                                                                                           |
| 2067 | Q13952-3         | 4                    | 7              | 9.6                   | 439    | 48150  | 5.4 | Isoform 2 of Q13952                                                                                                                                                                                                                                                                                                     |
| 2067 | Q13952           | 4                    | 7              | 9.2                   | 458    | 50302  | 6.1 | Nuclear transcription factor Y subunit gamma                                                                                                                                                                                                                                                                            |
| 2068 | Q4ZG30           | 4                    | 31             | 9.2                   | 579    | 66087  | 6.1 | Hypothetical protein ARL6IP2                                                                                                                                                                                                                                                                                            |
| 2068 | Q9H5M7           | 4                    | 31             | 9.2                   | 579    | 66159  | 6   | CDNA: FLJ23293 fis, clone HEP10514                                                                                                                                                                                                                                                                                      |
| 2068 | Q8NHH8           | 4                    | 31             | 9.2                   | 579    | 66057  | 6.2 | ARL6IP2                                                                                                                                                                                                                                                                                                                 |
| 2068 | UPI00001B00A2    | 4                    | 31             | 9.1                   | 583    | 66229  | 5.5 | ADP-ribosylation factor-like 6 interacting protein 2                                                                                                                                                                                                                                                                    |
| 2068 | Q8NHH9           | 4                    | 31             | 9.1                   | 583    | 66199  | 5.5 | ADP-ribosylation factor-like protein 6-interacting protein 2                                                                                                                                                                                                                                                            |
| 2069 | P14324           | 4                    | 15             | 9.1                   | 353    | 40532  | 5.2 | Farnesyl pyrophosphate synthetase (FPP synthetase) (FPS) (Farnesyl diphosphate synthetase) [Includes: Dimethylallyltransferase (EC 2.5.1.1); Geranyltransferase (EC 2.5.1.10)]                                                                                                                                          |
| 2070 | Q86YF0           | 4                    | 10             | 9.1                   | 481    | 50803  | 8.3 | ALDH16A1 protein                                                                                                                                                                                                                                                                                                        |
| 2070 | UPI000013E0FF    | 4                    | 10             | 5.5                   | 802    | 85127  | 6.8 | aldehyde dehydrogenase 16 family, member A1                                                                                                                                                                                                                                                                             |
| 2070 | Q8IZ83           | 4                    | 10             | 5.5                   | 802    | 85113  | 6.8 | Aldehyde dehydrogenase family 16 member A1                                                                                                                                                                                                                                                                              |
| 2071 | Q53HE9           | 4                    | 26             | 9                     | 487    | 53598  | 8.2 | Ankylosis, progressive homolog                                                                                                                                                                                                                                                                                          |
| 2071 | Q9HCJ1           | 4                    | 26             | 8.9                   | 492    | 54241  | 7.9 | Progressive ankylosis protein homolog                                                                                                                                                                                                                                                                                   |
| 2072 | O95208-3         | 4                    | 5              | 10.5                  | 545    | 57904  | 7.1 | Isoform 3 of O95208                                                                                                                                                                                                                                                                                                     |
| 2072 | UPI000013F8F2    | 4                    | 5              | 9.8                   | 584    | 62300  | 7.5 | Epsin-2 (EPS-15-interacting protein 2).                                                                                                                                                                                                                                                                                 |
| 2072 | Q52LD0           | 4                    | 5              | 9.8                   | 584    | 62272  | 7.5 | Epsin 2                                                                                                                                                                                                                                                                                                                 |
| 2072 | O95208-2         | 4                    | 5              | 9.8                   | 584    | 62285  | 7.5 | Isoform 2 of O95208                                                                                                                                                                                                                                                                                                     |
| 2072 | O95208           | 4                    | 5              | 8.9                   | 642    | 68554  | 7.5 | Epsin-2                                                                                                                                                                                                                                                                                                                 |
| 2072 | UPI000013D197    | 4                    | 5              | 8.9                   | 641    | 68482  | 7.5 | Epsin-2 (EPS-15-interacting protein 2).                                                                                                                                                                                                                                                                                 |
| 2072 | UPI000007255B    | 4                    | 5              | 8.9                   | 641    | 68454  | 7.5 | epsin 2 isoform b                                                                                                                                                                                                                                                                                                       |
| 2072 | O95208-4         | 4                    | 5              | 8.9                   | 641    | 68467  | 7.5 | Isoform 4 of O95208                                                                                                                                                                                                                                                                                                     |
| 2073 | P50542-2         | 4                    | 4              | 9.5                   | 602    | 66830  | 4.5 | Isoform 2 of P50542                                                                                                                                                                                                                                                                                                     |
| 2073 | P50542-3         | 4                    | 4              | 9                     | 631    | 69872  | 4.6 | Isoform 3 of P50542                                                                                                                                                                                                                                                                                                     |
| 2073 | P50542           | 4                    | 4              | 8.9                   | 639    | 70865  | 4.5 | Peroxisomal targeting signal 1 receptor                                                                                                                                                                                                                                                                                 |
| 2074 | Q53HS1           | 4                    | 6              | 8.8                   | 546    | 59584  | 7.5 | Achalasia, adrenocortical insufficiency, alacrimia (Allgrove, triple- A) variant                                                                                                                                                                                                                                        |
| 2074 | Q9NRG9           | 4                    | 6              | 8.8                   | 546    | 59574  | 7.5 | Aladin                                                                                                                                                                                                                                                                                                                  |
| 2075 | Q93052           | 4                    | 6              | 8.8                   | 612    | 65746  | 7.4 | Lipoma-preferred partner                                                                                                                                                                                                                                                                                                |
| 2076 | Q9NQW7-2         | 4                    | 10             | 9.2                   | 599    | 67227  | 5.8 | Isoform 2 of Q9NQW7                                                                                                                                                                                                                                                                                                     |
| 2076 | Q9NQW7           | 4                    | 10             | 8.8                   | 623    | 69918  | 5.7 | Xaa-Pro aminopeptidase 1                                                                                                                                                                                                                                                                                                |
| 2077 | Q6QNY5           | 4                    | 5              | 8.7                   | 722    | 79374  | 6.9 | UDP-N-acetylglucosamine-2-epimerase / N-acetylmannosamine kinase                                                                                                                                                                                                                                                        |
| 2077 | Q9Y223           | 4                    | 5              | 8.7                   | 722    | 79275  | 6.8 | Bifunctional UDP-N-acetylglucosamine 2-epimerase/N-acetylmannosamine kinase (UDP-GlcNAc-2-epimerase/ManAc kinase) [Includes: UDP-N-acetylglucosamine 2-epimerase (EC 5.1.3.14) (Uridine diphosphate-N-acetylglucosamine-2-epimerase) (UDP-GlcNAc-2-epimerase); N-acetylmannosamine kinase (EC 2.7.1.60) (ManAc kinase)] |
| 2077 | Q6QNY7           | 4                    | 5              | 8.7                   | 722    | 79305  | 6.7 | UDP-N-acetylglucosamine-2-epimerase / N-acetylmannosamine kinase                                                                                                                                                                                                                                                        |
| 2077 | Q6QNY6           | 4                    | 5              | 8.7                   | 722    | 79232  | 6.7 | UDP-N-acetylglucosamine-2-epimerase / N-acetylmannosamine kinase                                                                                                                                                                                                                                                        |
| 2078 | O00400           | 4                    | 8              | 8.4                   | 549    | 60909  | 7.3 | Acetyl-coenzyme A transporter 1                                                                                                                                                                                                                                                                                         |
| 2079 | P20020-5         | 4                    | 7              | 9.1                   | 1171   | 129152 | 6.2 | Isoform E of P20020                                                                                                                                                                                                                                                                                                     |
| 2079 | P20020-6         | 4                    | 7              | 9                     | 1184   | 130617 | 6   | Isoform K of P20020                                                                                                                                                                                                                                                                                                     |
| 2079 | P20020-2         | 4                    | 7              | 9                     | 1176   | 129516 | 6.2 | Isoform A of P20020                                                                                                                                                                                                                                                                                                     |
| 2079 | P20020-3         | 4                    | 7              | 8.7                   | 1220   | 134685 | 5.9 | Isoform B of P20020                                                                                                                                                                                                                                                                                                     |
| 2079 | P20020-4         | 4                    | 7              | 8.5                   | 1249   | 137804 | 6   | Isoform C of P20020                                                                                                                                                                                                                                                                                                     |

| No.  | Accession Number | Unique Peptide Count | Spectrum Count | Sequence Coverage (%) | Length | MolWt  | pI   | Descriptive Name                                                                                                        |
|------|------------------|----------------------|----------------|-----------------------|--------|--------|------|-------------------------------------------------------------------------------------------------------------------------|
| 2079 | P20020           | 4                    | 7              | 8.4                   | 1258   | 138755 | 6    | Plasma membrane calcium-transporting ATPase 1                                                                           |
| 2080 | O00186           | 4                    | 5              | 8.3                   | 592    | 67574  | 8    | Syntaxin-binding protein 3                                                                                              |
| 2080 | Q5VTL6           | 4                    | 5              | 8.3                   | 592    | 67764  | 7.8  | Syntaxin binding protein 3                                                                                              |
| 2080 | Q53FW1           | 4                    | 5              | 8.3                   | 592    | 67730  | 7.8  | Syntaxin binding protein 3 variant                                                                                      |
| 2081 | Q6ZMM9           | 4                    | 5              | 13.9                  | 317    | 35359  | 6.7  | CDNA FLJ16815 fis, clone THYMU3044175, highly similar to Adenosylhomocysteinase                                         |
| 2081 | Q2NkW8           | 4                    | 5              | 8.7                   | 505    | 56469  | 7.8  | AHCYL1 protein                                                                                                          |
| 2081 | O43865           | 4                    | 5              | 8.3                   | 530    | 58951  | 6.9  | Putative adenosylhomocysteinase 2                                                                                       |
| 2082 | Q13425           | 4                    | 5              | 8.3                   | 540    | 57950  | 8.8  | Beta-2-syntrophin                                                                                                       |
| 2083 | Q8N0X7           | 4                    | 8              | 8.3                   | 666    | 72833  | 5.9  | Spartin                                                                                                                 |
| 2084 | Q96SB3           | 4                    | 5              | 8.3                   | 815    | 89192  | 5    | Neurabin-2                                                                                                              |
| 2085 | Q9Y608           | 4                    | 7              | 8.3                   | 721    | 82171  | 6.9  | Leucine-rich repeat flightless-interacting protein 2                                                                    |
| 2086 | Q9Y5X1           | 4                    | 9              | 8.2                   | 595    | 66592  | 5.6  | Sorting nexin-9                                                                                                         |
| 2087 | Q32MB2           | 4                    | 13             | 8.1                   | 381    | 42010  | 8.2  | KRT73 protein                                                                                                           |
| 2088 | Q53GT4           | 4                    | 5              | 8.1                   | 737    | 82565  | 5.1  | Dipeptidylpeptidase III isoform 1 variant                                                                               |
| 2088 | Q9NY33           | 4                    | 5              | 8.1                   | 737    | 82589  | 5.1  | Dipeptidyl-peptidase 3                                                                                                  |
| 2088 | Q5JPB8           | 4                    | 5              | 8.1                   | 737    | 82617  | 5.1  | Hypothetical protein DKFZp686O1117                                                                                      |
| 2088 | Q53HL4           | 4                    | 5              | 8.1                   | 737    | 82549  | 5.1  | Dipeptidylpeptidase III isoform 1 variant                                                                               |
| 2089 | P16278           | 4                    | 7              | 8                     | 677    | 76091  | 6.6  | Beta-galactosidase precursor                                                                                            |
| 2089 | UPI0000E9BBE7    | 4                    | 7              | 8                     | 677    | 76075  | 6.6  | galactosidase, beta 1 isoform a                                                                                         |
| 2089 | UPI000049DF8F    | 4                    | 7              | 8                     | 677    | 76038  | 6.5  | Beta-galactosidase-related protein precursor (Beta-galactosidase-like protein) (S-Gal) (Elastin-binding protein) (EBP). |
| 2089 | Q53H18           | 4                    | 7              | 8                     | 677    | 76110  | 6.4  | Galactosidase, beta 1 variant                                                                                           |
| 2089 | Q53G40           | 4                    | 7              | 8                     | 677    | 76069  | 6.6  | Galactosidase, beta 1 variant                                                                                           |
| 2090 | Q53FR8           | 4                    | 7              | 7.9                   | 570    | 65070  | 8.2  | Vacuolar protein sorting 45A variant                                                                                    |
| 2090 | Q9NRW7           | 4                    | 7              | 7.9                   | 570    | 65077  | 8.2  | Vacuolar protein sorting-associated protein 45                                                                          |
| 2091 | Q8IW24           | 4                    | 5              | 7.9                   | 708    | 81952  | 6.8  | Exocyst complex component 5                                                                                             |
| 2092 | Q9UBU9           | 4                    | 12             | 7.9                   | 619    | 70182  | 8.5  | Nuclear RNA export factor 1                                                                                             |
| 2093 | Q14677           | 4                    | 8              | 7.8                   | 625    | 68259  | 6.4  | Clathrin interactor 1                                                                                                   |
| 2093 | Q14677-2         | 4                    | 8              | 7.8                   | 625    | 68166  | 6.4  | Isoform 2 of Q14677                                                                                                     |
| 2094 | Q59FS7           | 4                    | 4              | 7.8                   | 676    | 75048  | 8.5  | DEAD (Asp-Glu-Ala-Asp) box polypeptide 24 variant                                                                       |
| 2094 | Q9GZR7           | 4                    | 4              | 6.2                   | 859    | 96332  | 9.1  | ATP-dependent RNA helicase DDX24                                                                                        |
| 2095 | Q8N2N3           | 4                    | 12             | 17.3                  | 243    | 27824  | 7.8  | CDNA FLJ90102 fis, clone HEMBA1006299, highly similar to Putative NFkB activating protein 373                           |
| 2095 | Q5T9L3           | 4                    | 12             | 7.8                   | 541    | 62253  | 7.4  | Integral membrane protein GPR177 precursor                                                                              |
| 2095 | Q5T9L3-2         | 4                    | 12             | 7.7                   | 543    | 62552  | 7.6  | Isoform 2 of Q5T9L3                                                                                                     |
| 2095 | Q8N108-9         | 4                    | 12             | 5.9                   | 710    | 81719  | 4.7  | Isoform 9 of Q8N108                                                                                                     |
| 2096 | Q969V3           | 4                    | 4              | 7.8                   | 563    | 62974  | 6.9  | Nicalin precursor                                                                                                       |
| 2096 | Q969V3-2         | 4                    | 4              | 7.8                   | 562    | 62846  | 6.9  | Isoform 2 of Q969V3                                                                                                     |
| 2097 | Q8WXA9-2         | 4                    | 5              | 7.7                   | 624    | 71650  | 10.2 | Isoform 2 of Q8WXA9                                                                                                     |
| 2098 | O43815-2         | 4                    | 4              | 8.1                   | 731    | 80761  | 5.2  | Isoform 2 of O43815                                                                                                     |
| 2098 | UPI0000D61189    | 4                    | 4              | 7.9                   | 743    | 81688  | 5.1  | Striatin.                                                                                                               |
| 2098 | Q3B874           | 4                    | 4              | 7.8                   | 755    | 84267  | 5.4  | STRN protein                                                                                                            |
| 2098 | O43815           | 4                    | 4              | 7.6                   | 780    | 86132  | 5.3  | Striatin                                                                                                                |
| 2099 | Q13123           | 4                    | 5              | 7.5                   | 557    | 65630  | 6.6  | Protein Red                                                                                                             |
| 2099 | Q9UK43           | 4                    | 5              | 7.5                   | 557    | 65586  | 6.6  | Chondrosarcoma-associated protein 2                                                                                     |
| 2099 | Q95HA6           | 4                    | 5              | 7.5                   | 557    | 65632  | 6.6  | IK cytokine, down-regulator of HLA II                                                                                   |
| 2099 | Q6IPD8           | 4                    | 5              | 7.5                   | 557    | 65602  | 6.6  | IK cytokine, down-regulator of HLA II                                                                                   |
| 2100 | O43719           | 4                    | 4              | 7.4                   | 755    | 85853  | 4.4  | HIV Tat-specific factor 1                                                                                               |
| 2101 | Q5T176           | 4                    | 5              | 7.4                   | 702    | 77684  | 5.4  | Pre-B-cell leukemia transcription factor interacting protein 1                                                          |
| 2101 | Q9HA02           | 4                    | 5              | 7.4                   | 702    | 77760  | 5.4  | CDNA FLJ12435 fis, clone NT2RM1000059                                                                                   |
| 2101 | Q9HD85           | 4                    | 5              | 7.1                   | 731    | 80727  | 5.3  | Hematopoietic PBX-interacting protein                                                                                   |
| 2101 | Q96AQ6           | 4                    | 5              | 7.1                   | 731    | 80643  | 5.3  | Pre-B-cell leukemia transcription factor-interacting protein 1                                                          |
| 2102 | O43395           | 4                    | 13             | 7.3                   | 683    | 77529  | 9.5  | U4/U6 small nuclear ribonucleoprotein Prp3                                                                              |
| 2102 | Q53GV6           | 4                    | 13             | 7.3                   | 683    | 77441  | 9.5  | PRP3 pre-mRNA processing factor 3 homolog                                                                               |
| 2102 | O43395-2         | 4                    | 13             | 7.3                   | 682    | 77472  | 9.5  | Isoform 2 of O43395                                                                                                     |
| 2103 | O60504           | 4                    | 6              | 7.3                   | 671    | 75329  | 9.5  | Vinexin                                                                                                                 |
| 2104 | P61764           | 4                    | 5              | 7.2                   | 594    | 67569  | 7    | Syntaxin-binding protein 1                                                                                              |
| 2104 | Q5JU62           | 4                    | 5              | 7.1                   | 603    | 68736  | 6.8  | Syntaxin binding protein 1                                                                                              |
| 2105 | Q96CW5-2         | 4                    | 4              | 7.9                   | 824    | 93885  | 7.8  | Isoform 2 of Q96CW5                                                                                                     |
| 2105 | Q96CW5           | 4                    | 4              | 7.2                   | 907    | 103571 | 8.1  | Gamma-tubulin complex component 3                                                                                       |
| 2106 | Q8NEU8           | 4                    | 5              | 7.1                   | 664    | 74521  | 4.9  | DCC-interacting protein 13 beta                                                                                         |
| 2106 | UPI000006D221    | 4                    | 5              | 7.1                   | 664    | 74493  | 4.9  | DIP13 beta                                                                                                              |
| 2107 | Q9ULX6           | 4                    | 4              | 7.1                   | 646    | 71640  | 5    | A-kinase anchor protein 8-like                                                                                          |
| 2108 | Q52MB3           | 4                    | 6              | 7                     | 672    | 78029  | 10.3 | SAFB-like transcription modulator                                                                                       |
| 2108 | UPI0000039EA4    | 4                    | 6              | 4.5                   | 1034   | 117149 | 7.9  | modulator of estrogen induced transcription isoform a                                                                   |
| 2109 | UPI000020A59A    | 4                    | 14             | 7                     | 660    | 76329  | 7.4  | hypothetical protein LOC55129                                                                                           |
| 2110 | P10515           | 4                    | 4              | 6.8                   | 614    | 65781  | 6.1  | Dihydrolipoyllysine-residue acetyltransferase component of pyruvate dehydrogenase complex, mitochondrial precursor      |
| 2110 | Q86Y15           | 4                    | 4              | 6.5                   | 647    | 68997  | 7.8  | Dihydrolipoamide S-acetyltransferase                                                                                    |
| 2110 | Q53EP3           | 4                    | 4              | 6.5                   | 647    | 68996  | 8    | Dihydrolipoamide S-acetyltransferase (E2 component of pyruvate dehydrogenase complex) variant                           |

| No.  | Accession Number | Unique Peptide Count | Spectrum Count | Sequence Coverage (%) | Length | MolWt  | pI   | Descriptive Name                                                                                                                                                                                                                                               |
|------|------------------|----------------------|----------------|-----------------------|--------|--------|------|----------------------------------------------------------------------------------------------------------------------------------------------------------------------------------------------------------------------------------------------------------------|
| 2111 | P19447           | 4                    | 4              | 6.8                   | 782    | 89278  | 7.2  | TFIIH basal transcription factor complex helicase XPB subunit                                                                                                                                                                                                  |
| 2111 | UPI0000D61228    | 4                    | 4              | 6.8                   | 784    | 89463  | 7.2  | TFIIH basal transcription factor complex helicase XPB subunit (EC 3.6.1.-) (Basic transcription factor 2 89 kDa subunit) (BTF2-p89) (TFIIH 89 kDa subunit) (DNA-repair protein complementing XP-B cells) (Xeroderma pigmentosum group B-complementing protein) |
| 2112 | P49959-2         | 4                    | 4              | 7.1                   | 680    | 77642  | 5.8  | Isoform 2 of P49959                                                                                                                                                                                                                                            |
| 2112 | P49959           | 4                    | 4              | 6.8                   | 708    | 80593  | 5.9  | Double-strand break repair protein MRE11A                                                                                                                                                                                                                      |
| 2113 | O95453           | 4                    | 4              | 6.7                   | 639    | 73451  | 6.2  | Poly(A)-specific ribonuclease PARN                                                                                                                                                                                                                             |
| 2113 | UPI0000D6199C    | 4                    | 4              | 6.7                   | 641    | 73696  | 6.2  | Poly(A)-specific ribonuclease PARN (EC 3.1.13.4) (Polyadenylate- specific ribonuclease) (Deadenylating nuclease) (Deadenylation nuclease).                                                                                                                     |
| 2114 | O00461           | 4                    | 8              | 6.6                   | 696    | 81880  | 4.8  | Golgi phosphoprotein 4                                                                                                                                                                                                                                         |
| 2115 | Q86SZ6           | 4                    | 15             | 8.2                   | 489    | 55251  | 7.1  | Full-length cDNA clone CS0DJ012YD11 of T cells (Jurkat cell line) of Homo sapiens                                                                                                                                                                              |
| 2115 | O15321           | 4                    | 15             | 6.6                   | 606    | 68861  | 7.2  | Transmembrane 9 superfamily protein member 1 precursor                                                                                                                                                                                                         |
| 2116 | A4FVC0           | 4                    | 7              | 6.4                   | 808    | 91496  | 9.4  | EIF2C2 protein                                                                                                                                                                                                                                                 |
| 2116 | UPI0000168652    | 4                    | 7              | 6.1                   | 859    | 97208  | 9.2  | eukaryotic translation initiation factor 2C, 2                                                                                                                                                                                                                 |
| 2116 | Q9UKV8           | 4                    | 7              | 6.1                   | 851    | 96799  | 9.2  | Eukaryotic translation initiation factor 2C 2                                                                                                                                                                                                                  |
| 2116 | UPI0000D6250C    | 4                    | 7              | 6                     | 861    | 97407  | 9.2  | Eukaryotic translation initiation factor 2C 2 (eIF2C 2) (eIF-2C 2) (Argonaute-2) (Slicer protein) (PAZ Piwi domain protein) (PPD).                                                                                                                             |
| 2117 | UPI000013FCDE    | 4                    | 9              | 6.6                   | 808    | 89467  | 10.1 | arginine/proline rich coiled-coil 1                                                                                                                                                                                                                            |
| 2117 | Q9ULN3           | 4                    | 9              | 6.5                   | 813    | 89681  | 10   | KIAA1187 protein                                                                                                                                                                                                                                               |
| 2117 | Q3KQU3           | 4                    | 9              | 6.3                   | 841    | 92820  | 10.1 | Arginine/proline-rich coiled-coil protein 1                                                                                                                                                                                                                    |
| 2118 | A2AIB8           | 4                    | 6              | 6.2                   | 613    | 68042  | 5.5  | KIAA1949                                                                                                                                                                                                                                                       |
| 2118 | UPI00006C0AE4    | 4                    | 6              | 6.2                   | 613    | 67844  | 5.4  | PREDICTED: similar to Protein KIAA1949 isoform 7                                                                                                                                                                                                               |
| 2118 | Q6NYC8           | 4                    | 6              | 6.2                   | 613    | 67943  | 5.4  | Uncharacterized protein KIAA1949                                                                                                                                                                                                                               |
| 2119 | Q0D2N8           | 4                    | 4              | 6.2                   | 710    | 77782  | 6.4  | SARM1 protein                                                                                                                                                                                                                                                  |
| 2119 | Q6SZW1           | 4                    | 4              | 6.1                   | 724    | 79388  | 6.6  | Sterile alpha and TIR motif-containing protein 1                                                                                                                                                                                                               |
| 2120 | P33121-2         | 4                    | 6              | 6                     | 688    | 76871  | 7    | Isoform 2 of P33121                                                                                                                                                                                                                                            |
| 2120 | P33121           | 4                    | 6              | 5.9                   | 698    | 77943  | 7.1  | Long-chain-fatty-acid--CoA ligase 1                                                                                                                                                                                                                            |
| 2121 | Q9BVJ6           | 4                    | 10             | 5.8                   | 771    | 87978  | 7.9  | U3 small nucleolar RNA-associated protein 14 homolog A                                                                                                                                                                                                         |
| 2122 | Q04446           | 4                    | 4              | 5.7                   | 702    | 80460  | 6.3  | 1,4-alpha-glucan branching enzyme                                                                                                                                                                                                                              |
| 2123 | Q68D75           | 4                    | 8              | 5.7                   | 847    | 96924  | 7.5  | Oxysterol-binding protein                                                                                                                                                                                                                                      |
| 2123 | UPI0000130E99    | 4                    | 8              | 5.7                   | 847    | 96956  | 7.5  | oxysterol-binding protein-like protein 8 isoform b                                                                                                                                                                                                             |
| 2123 | Q9BZF1-2         | 4                    | 8              | 5.5                   | 874    | 99714  | 7.1  | Isoform 2 of Q9BZF1                                                                                                                                                                                                                                            |
| 2123 | Q9BZF1           | 4                    | 8              | 5.4                   | 889    | 101196 | 7    | Oxysterol-binding protein-related protein 8                                                                                                                                                                                                                    |
| 2124 | Q9Y4F1           | 4                    | 10             | 5.6                   | 1045   | 118633 | 8.2  | FERM, RhoGEF and pleckstrin domain-containing protein 1                                                                                                                                                                                                        |
| 2124 | UPI000041C6E3    | 4                    | 10             | 5.5                   | 1076   | 122095 | 8.5  | FERM, RhoGEF and pleckstrin domain-containing protein 1 (Chondrocyte- derived ezrin-like protein).                                                                                                                                                             |
| 2124 | Q9Y4F1-2         | 4                    | 10             | 5.5                   | 1076   | 122113 | 8.5  | Isoform 2 of Q9Y4F1                                                                                                                                                                                                                                            |
| 2125 | Q3ZAQ6           | 4                    | 19             | 5.5                   | 839    | 94447  | 6.7  | Autophagy 9-like 1 protein                                                                                                                                                                                                                                     |
| 2125 | UPI0000456EF3    | 4                    | 19             | 5.5                   | 839    | 94471  | 6.7  | Autophagy-related protein 9A (APG9-like 1).                                                                                                                                                                                                                    |
| 2125 | Q7Z3C6           | 4                    | 19             | 5.5                   | 839    | 94466  | 6.7  | Autophagy-related protein 9A                                                                                                                                                                                                                                   |
| 2126 | Q96JM3           | 4                    | 5              | 5.5                   | 812    | 89099  | 8.4  | Zinc finger protein KIAA1802                                                                                                                                                                                                                                   |
| 2127 | Q9BRC2           | 4                    | 5              | 5.5                   | 750    | 83856  | 6.8  | TBCD protein                                                                                                                                                                                                                                                   |
| 2127 | Q9BTW9-5         | 4                    | 5              | 5.4                   | 757    | 84263  | 6.4  | Isoform 5 of Q9BTW9                                                                                                                                                                                                                                            |
| 2127 | UPI000020053F    | 4                    | 5              | 3.4                   | 1192   | 132600 | 6.2  | beta-tubulin cofactor D                                                                                                                                                                                                                                        |
| 2127 | Q9BTW9           | 4                    | 5              | 3.4                   | 1192   | 132528 | 6.2  | Tubulin-specific chaperone D                                                                                                                                                                                                                                   |
| 2127 | Q9BTW9-4         | 4                    | 5              | 3.3                   | 1248   | 138597 | 6.4  | Isoform 4 of Q9BTW9                                                                                                                                                                                                                                            |
| 2128 | P23588           | 4                    | 10             | 5.4                   | 611    | 69224  | 5.7  | Eukaryotic translation initiation factor 4B                                                                                                                                                                                                                    |
| 2128 | UPI0000D621F8    | 4                    | 10             | 5.4                   | 610    | 69167  | 5.8  | Eukaryotic translation initiation factor 4B (eIF-4B).                                                                                                                                                                                                          |
| 2128 | Q8WYK5           | 4                    | 10             | 5.4                   | 611    | 69151  | 5.7  | Eukaryotic translation initiation factor 4B                                                                                                                                                                                                                    |
| 2128 | Q6IB46           | 4                    | 10             | 5.4                   | 611    | 69137  | 5.7  | EIF4B protein                                                                                                                                                                                                                                                  |
| 2128 | Q6GPH5           | 4                    | 10             | 5.4                   | 611    | 69166  | 5.7  | Eukaryotic translation initiation factor 4B                                                                                                                                                                                                                    |
| 2128 | Q53HQ2           | 4                    | 10             | 5.4                   | 611    | 69151  | 5.7  | Eukaryotic translation initiation factor 4B variant                                                                                                                                                                                                            |
| 2128 | Q4G0E3           | 4                    | 10             | 5.4                   | 611    | 69098  | 5.7  | Eukaryotic translation initiation factor 4B                                                                                                                                                                                                                    |
| 2129 | Q9BZQ6           | 4                    | 7              | 5.4                   | 889    | 100305 | 4.9  | ER degradation-enhancing alpha-mannosidase-like 3                                                                                                                                                                                                              |
| 2130 | Q15269           | 4                    | 12             | 5.3                   | 919    | 102452 | 6.1  | Periodic tryptophan protein 2 homolog                                                                                                                                                                                                                          |
| 2131 | Q9H7I6           | 4                    | 24             | 7.1                   | 672    | 71623  | 7.9  | FLJ00100 protein                                                                                                                                                                                                                                               |
| 2131 | Q9H7Q7           | 4                    | 24             | 6.2                   | 772    | 81919  | 8.3  | FLJ00010 protein                                                                                                                                                                                                                                               |
| 2131 | Q9BXP2           | 4                    | 24             | 5.3                   | 914    | 96110  | 8.1  | Solute carrier family 12 member 9                                                                                                                                                                                                                              |
| 2131 | Q9NQR5           | 4                    | 24             | 5.3                   | 914    | 96171  | 8.1  | Cation-chloride cotransporter-interacting protein                                                                                                                                                                                                              |
| 2131 | Q9BYI0           | 4                    | 24             | 5.3                   | 914    | 96079  | 8.3  | Cation chloride cotransporter 6                                                                                                                                                                                                                                |
| 2132 | Q9H7C8           | 4                    | 9              | 6.1                   | 824    | 94301  | 7    | CDNA: FLJ21040 fis, clone CAE10642                                                                                                                                                                                                                             |
| 2132 | Q7L371           | 4                    | 9              | 5.8                   | 869    | 99589  | 7.1  | MGC16824 protein                                                                                                                                                                                                                                               |
| 2132 | Q6PDA0           | 4                    | 9              | 5.2                   | 963    | 109530 | 7.2  | Esophageal cancer associated protein                                                                                                                                                                                                                           |
| 2132 | Q86W66           | 4                    | 9              | 5.2                   | 963    | 109562 | 7.2  | Esophageal cancer associated protein                                                                                                                                                                                                                           |
| 2132 | Q7Z3J2           | 4                    | 9              | 5.1                   | 972    | 110472 | 7.4  | Hypothetical protein DKFZp313H1733                                                                                                                                                                                                                             |
| 2133 | Q08AF4           | 4                    | 6              | 5.1                   | 936    | 106183 | 6.4  | PKN2 protein                                                                                                                                                                                                                                                   |

| No.  | Accession Number | Unique Peptide Count | Spectrum Count | Sequence Coverage (%) | Length | MolWt  | pI  | Descriptive Name                                                                                                                                                                                                                                           |
|------|------------------|----------------------|----------------|-----------------------|--------|--------|-----|------------------------------------------------------------------------------------------------------------------------------------------------------------------------------------------------------------------------------------------------------------|
| 2133 | UPI0000D61F53    | 4                    | 6              | 4.9                   | 984    | 112117 | 6.4 | Serine/threonine-protein kinase N2 (EC 2.7.11.13) (Protein kinase C- like 2) (Protein-kinase C-related kinase 2).                                                                                                                                          |
| 2133 | Q16513           | 4                    | 6              | 4.9                   | 984    | 112035 | 6.3 | Serine/threonine-protein kinase N2                                                                                                                                                                                                                         |
| 2134 | Q9BSJ2           | 4                    | 10             | 5.1                   | 902    | 102534 | 6.8 | Gamma-tubulin complex component 2                                                                                                                                                                                                                          |
| 2135 | UPI00003E59F4    | 4                    | 15             | 6.5                   | 836    | 95843  | 6   | SLIT-ROBO Rho GTPase activating protein 2 isoform b                                                                                                                                                                                                        |
| 2135 | A2RUF3           | 4                    | 15             | 5                     | 1071   | 120870 | 6.7 | SLIT-ROBO Rho GTPase activating protein 2                                                                                                                                                                                                                  |
| 2135 | O75044           | 4                    | 15             | 5                     | 1071   | 120880 | 6.7 | SLIT-ROBO Rho GTPase-activating protein 2                                                                                                                                                                                                                  |
| 2136 | UPI000051912A    | 4                    | 10             | 5.1                   | 984    | 111145 | 9   | RNA-binding protein 26 (RNA-binding motif protein 26) (CTCL tumor antigen se70-2).                                                                                                                                                                         |
| 2136 | Q5T8P6-3         | 4                    | 10             | 5.1                   | 980    | 110666 | 9.1 | Isoform 3 of Q5T8P6                                                                                                                                                                                                                                        |
| 2136 | Q5T8P6-2         | 4                    | 10             | 5.1                   | 983    | 111024 | 9.1 | Isoform 2 of Q5T8P6                                                                                                                                                                                                                                        |
| 2136 | Q5T8P6           | 4                    | 10             | 5                     | 1007   | 113597 | 9.2 | RNA-binding protein 26                                                                                                                                                                                                                                     |
| 2136 | UPI0000519129    | 4                    | 10             | 5                     | 1008   | 113718 | 9.1 | RNA-binding protein 26 (RNA-binding motif protein 26) (CTCL tumor antigen se70-2).                                                                                                                                                                         |
| 2137 | Q9UNX4           | 4                    | 6              | 5                     | 943    | 106099 | 6.6 | WD repeat protein 3                                                                                                                                                                                                                                        |
| 2138 | Q53ET5           | 4                    | 9              | 4.9                   | 831    | 95804  | 6.7 | ATPase, H+ transporting, lysosomal V0 subunit a isoform 1 variant                                                                                                                                                                                          |
| 2138 | UPI0000D62334    | 4                    | 9              | 4.9                   | 837    | 96477  | 6.7 | Vacuolar proton translocating ATPase 116 kDa subunit a isoform 1 (V- ATPase 116 kDa isoform a1) (Clathrin-coated vesicle/synaptic vesicle proton pump 116 kDa subunit) (Vacuolar proton pump subunit 1) (Vacuolar adenosine triphosphatase subunit Ac116). |
| 2138 | Q93050-1         | 4                    | 9              | 4.9                   | 831    | 95756  | 6.7 | Isoform 2 of Q93050                                                                                                                                                                                                                                        |
| 2138 | Q93050           | 4                    | 9              | 4.9                   | 837    | 96413  | 6.4 | Vacuolar proton translocating ATPase 116 kDa subunit a isoform 1                                                                                                                                                                                           |
| 2138 | Q5CZH6           | 4                    | 9              | 4.9                   | 838    | 96603  | 6.6 | Hypothetical protein DKFZp686N0561                                                                                                                                                                                                                         |
| 2138 | Q53X12           | 4                    | 9              | 4.9                   | 831    | 95751  | 6.7 | Vacuolar-type H(+)-ATPase                                                                                                                                                                                                                                  |
| 2139 | Q6ZXV5           | 4                    | 26             | 4.9                   | 915    | 104009 | 8.9 | Transmembrane and TPR repeat-containing protein 3                                                                                                                                                                                                          |
| 2139 | UPI00001A9DBE    | 4                    | 26             | 4.9                   | 914    | 103835 | 8.9 | transmembrane and tetratricopeptide repeat containing 3                                                                                                                                                                                                    |
| 2139 | Q6ZXV5-2         | 4                    | 26             | 4.9                   | 914    | 103880 | 8.8 | Isoform 2 of Q6ZXV5                                                                                                                                                                                                                                        |
| 2140 | Q96PD2           | 4                    | 5              | 4.9                   | 775    | 85035  | 7.2 | Discoidin, CUB and LCCL domain-containing protein 2 precursor                                                                                                                                                                                              |
| 2140 | Q96PD2-2         | 4                    | 5              | 4.8                   | 789    | 86657  | 7.2 | Isoform 2 of Q96PD2                                                                                                                                                                                                                                        |
| 2141 | O75157-2         | 4                    | 9              | 4.9                   | 756    | 76392  | 4.9 | Isoform 2 of O75157                                                                                                                                                                                                                                        |
| 2141 | O75157           | 4                    | 9              | 4.7                   | 780    | 79228  | 5   | TSC22 domain family protein 2                                                                                                                                                                                                                              |
| 2142 | Q7Z5K2           | 4                    | 4              | 4.7                   | 1190   | 132945 | 5.4 | Wings apart-like protein homolog                                                                                                                                                                                                                           |
| 2142 | UPI0000D60F87    | 4                    | 4              | 4.6                   | 1228   | 137363 | 5.9 | Wings apart-like protein homolog (Friend of EBNA2 protein).                                                                                                                                                                                                |
| 2142 | Q7Z5K2-2         | 4                    | 4              | 4.6                   | 1227   | 137314 | 5.9 | Isoform 2 of Q7Z5K2                                                                                                                                                                                                                                        |
| 2143 | Q94906           | 4                    | 7              | 4.6                   | 941    | 106925 | 8.3 | Pre-mRNA-processing factor 6                                                                                                                                                                                                                               |
| 2144 | Q9BTX0           | 4                    | 8              | 5                     | 852    | 94370  | 6.7 | RNA binding motif protein 10                                                                                                                                                                                                                               |
| 2144 | Q5JRR2           | 4                    | 8              | 5                     | 853    | 94469  | 6.7 | RNA binding motif protein 10                                                                                                                                                                                                                               |
| 2144 | P98175           | 4                    | 8              | 4.6                   | 929    | 103459 | 6   | RNA-binding protein 10                                                                                                                                                                                                                                     |
| 2144 | Q9BTE4           | 4                    | 8              | 4.6                   | 930    | 103533 | 6   | RNA binding motif protein 10                                                                                                                                                                                                                               |
| 2144 | Q7Z3D7           | 4                    | 8              | 4.3                   | 995    | 110338 | 6.2 | Hypothetical protein DKFZp686E2459                                                                                                                                                                                                                         |
| 2145 | P52732           | 4                    | 14             | 4.5                   | 1056   | 119159 | 5.6 | Kinesin-like protein KIF11                                                                                                                                                                                                                                 |
| 2146 | Q9Y4E8-3         | 4                    | 5              | 4.5                   | 956    | 109796 | 5.2 | Isoform 3 of Q9Y4E8                                                                                                                                                                                                                                        |
| 2146 | Q9Y4E8-2         | 4                    | 5              | 4.5                   | 952    | 109297 | 5.2 | Isoform 2 of Q9Y4E8                                                                                                                                                                                                                                        |
| 2146 | Q9Y4E8           | 4                    | 5              | 4.4                   | 981    | 112419 | 5.2 | Ubiquitin carboxyl-terminal hydrolase 15                                                                                                                                                                                                                   |
| 2147 | O00291           | 4                    | 4              | 4.3                   | 1030   | 115442 | 5.3 | Huntingtin-interacting protein 1                                                                                                                                                                                                                           |
| 2147 | UPI0000D61C73    | 4                    | 4              | 4.2                   | 1039   | 116414 | 5.3 | Huntingtin-interacting protein 1 (HIP-1).                                                                                                                                                                                                                  |
| 2147 | Q2TB58           | 4                    | 4              | 4.2                   | 1037   | 116221 | 5.3 | Huntingtin interacting protein 1                                                                                                                                                                                                                           |
| 2148 | Q13488           | 4                    | 6              | 4.3                   | 830    | 92998  | 7   | Vacuolar proton translocating ATPase 116 kDa subunit a isoform 3                                                                                                                                                                                           |
| 2148 | Q8WVC5           | 4                    | 6              | 4.3                   | 830    | 92968  | 7.1 | T-cell, immune regulator 1, ATPase, H+ transporting, lysosomal V0 subunit A3                                                                                                                                                                               |
| 2149 | Q14562           | 4                    | 9              | 4.2                   | 1220   | 139314 | 8.3 | ATP-dependent RNA helicase DHX8                                                                                                                                                                                                                            |
| 2149 | Q86YB2           | 4                    | 9              | 4.2                   | 1220   | 139314 | 8.4 | DEAH (Asp-Glu-Ala-His) box polypeptide 8                                                                                                                                                                                                                   |
| 2149 | Q86X36           | 4                    | 9              | 4.2                   | 1220   | 139287 | 8.1 | DEAH (Asp-Glu-Ala-His) box polypeptide 8                                                                                                                                                                                                                   |
| 2150 | Q96H94           | 4                    | 8              | 5.6                   | 806    | 85041  | 8.8 | MAP1S protein                                                                                                                                                                                                                                              |
| 2150 | Q9BRC6           | 4                    | 8              | 4.7                   | 962    | 101969 | 7.6 | MAP1S protein                                                                                                                                                                                                                                              |
| 2150 | Q66K74           | 4                    | 8              | 4.2                   | 1059   | 112227 | 7.3 | Microtubule-associated protein 1S                                                                                                                                                                                                                          |
| 2150 | Q8N3W5           | 4                    | 8              | 4.2                   | 1059   | 112239 | 7.3 | VCY2 interacting protein-1                                                                                                                                                                                                                                 |
| 2150 | Q8N3L8           | 4                    | 8              | 4.2                   | 1061   | 112497 | 7.4 | Hypothetical protein DKFZp761H0722                                                                                                                                                                                                                         |
| 2150 | Q6NXF1           | 4                    | 8              | 4.2                   | 1061   | 112437 | 7.4 | Microtubule-associated protein 1S                                                                                                                                                                                                                          |
| 2151 | Q8IZL8           | 4                    | 12             | 4.2                   | 1130   | 119700 | 4.3 | Proline-, glutamic acid- and leucine-rich protein 1                                                                                                                                                                                                        |
| 2151 | UPI00000740E9    | 4                    | 12             | 4.2                   | 1130   | 119624 | 4.3 | proline-, glutamic acid-, leucine-rich protein 1                                                                                                                                                                                                           |
| 2152 | Q9BZH6           | 4                    | 8              | 4.2                   | 1224   | 136685 | 6.9 | Bromodomain and WD repeat domain-containing protein 2                                                                                                                                                                                                      |
| 2153 | P28340           | 4                    | 5              | 4.1                   | 1107   | 123631 | 7   | DNA polymerase delta catalytic subunit                                                                                                                                                                                                                     |
| 2153 | UPI00001297C1    | 4                    | 5              | 4.1                   | 1107   | 123635 | 7   | polymerase (DNA directed), delta 1, catalytic subunit 125kDa                                                                                                                                                                                               |
| 2153 | Q308M6           | 4                    | 5              | 4                     | 1133   | 126338 | 7.4 | DNA-directed polymerase delta 1                                                                                                                                                                                                                            |
| 2154 | Q5TER5           | 4                    | 6              | 4.2                   | 860    | 98089  | 8.4 | Exosome component 10                                                                                                                                                                                                                                       |

| No.  | Accession Number | Unique Peptide Count | Spectrum Count | Sequence Coverage (%) | Length | MolWt  | pI   | Descriptive Name                                                                                                             |
|------|------------------|----------------------|----------------|-----------------------|--------|--------|------|------------------------------------------------------------------------------------------------------------------------------|
| 2154 | Q01780           | 4                    | 6              | 4.1                   | 885    | 100831 | 8.5  | Exosome component 10                                                                                                         |
| 2155 | Q9H8Z6           | 4                    | 5              | 5.1                   | 857    | 96078  | 6.4  | CDNA FLJ13119 fis, clone NT2RP3002671, weakly similar to ELONGATION FACTOR 2                                                 |
| 2155 | Q7Z2Z2           | 4                    | 5              | 4.1                   | 1069   | 119889 | 5.8  | Elongation factor Tu GTP-binding domain-containing protein 1                                                                 |
| 2155 | UPI00001FEA3A    | 4                    | 5              | 4.1                   | 1069   | 119887 | 5.8  | elongation factor Tu GTP binding domain containing 1 isoform 2                                                               |
| 2155 | UPI00001FEA35    | 4                    | 5              | 3.9                   | 1120   | 125430 | 5.9  | elongation factor Tu GTP binding domain containing 1 isoform 1                                                               |
| 2156 | Q7Z7M9           | 4                    | 12             | 4                     | 940    | 106266 | 9.5  | Polypeptide N-acetylgalactosaminyltransferase 5                                                                              |
| 2157 | Q9UDY2           | 4                    | 6              | 3.9                   | 1190   | 133972 | 7.4  | Tight junction protein ZO-2                                                                                                  |
| 2157 | UPI0000141800    | 4                    | 6              | 3.9                   | 1190   | 133958 | 7.4  | tight junction protein 2 (zona occludens 2) isoform 1                                                                        |
| 2157 | Q9UDY2-3         | 4                    | 6              | 3.9                   | 1167   | 131382 | 7.1  | Isoform C1 of Q9UDY2                                                                                                         |
| 2158 | Q8IX12           | 4                    | 7              | 3.7                   | 1150   | 132821 | 5.8  | Cell division cycle and apoptosis regulator protein 1                                                                        |
| 2159 | Q8IZH2           | 4                    | 7              | 3.6                   | 1706   | 194106 | 7.2  | 5'-3' exoribonuclease 1                                                                                                      |
| 2159 | UPI0000480180    | 4                    | 7              | 3.6                   | 1693   | 192713 | 7.3  | 5'''-3''' exoribonuclease 1 isoform b                                                                                        |
| 2159 | Q8IZH2-2         | 4                    | 7              | 3.6                   | 1694   | 192842 | 7.3  | Isoform 2 of Q8IZH2                                                                                                          |
| 2160 | O15118           | 4                    | 32             | 3.5                   | 1278   | 142166 | 5.4  | Niemann-Pick C1 protein precursor                                                                                            |
| 2160 | UPI00001303D7    | 4                    | 32             | 3.5                   | 1278   | 142148 | 5.4  | Niemann-Pick disease, type C1 precursor                                                                                      |
| 2160 | Q59GR1           | 4                    | 32             | 3.5                   | 1289   | 143231 | 5.4  | Niemann-Pick disease, type C1 variant                                                                                        |
| 2161 | Q6PGP7           | 4                    | 5              | 3.5                   | 1564   | 175485 | 7.5  | Tetrapeptide repeat protein 37                                                                                               |
| 2162 | Q6PL18           | 4                    | 5              | 3.4                   | 1390   | 158554 | 6.3  | ATPase family AAA domain-containing protein 2                                                                                |
| 2163 | Q9NRY4           | 4                    | 9              | 3.3                   | 1513   | 172228 | 6.8  | Glucocorticoid receptor DNA-binding factor 1                                                                                 |
| 2163 | UPI0000D617DA    | 4                    | 9              | 3.3                   | 1514   | 172419 | 6.8  | Glucocorticoid receptor DNA-binding factor 1 (Glucocorticoid receptor repression factor 1) (GRF-1) (Rho GAP p190A) (p190-A). |
| 2163 | Q9NRY4-2         | 4                    | 9              | 3.3                   | 1499   | 170513 | 6.6  | Isoform 2 of Q9NRY4                                                                                                          |
| 2164 | Q5K651           | 4                    | 9              | 3.2                   | 1589   | 184280 | 7.8  | Sterile alpha motif domain-containing protein 9                                                                              |
| 2165 | O75976           | 4                    | 8              | 3.1                   | 1380   | 152931 | 6    | Carboxypeptidase D precursor                                                                                                 |
| 2166 | UPI0000470061    | 4                    | 4              | 3.8                   | 1071   | 120732 | 5.3  | AT rich interactive domain 4B isoform 2                                                                                      |
| 2166 | Q4LE39-3         | 4                    | 4              | 3.6                   | 1153   | 130418 | 5    | Isoform 3 of Q4LE39                                                                                                          |
| 2166 | Q4LE39-2         | 4                    | 4              | 3.3                   | 1226   | 137607 | 5.5  | Isoform 2 of Q4LE39                                                                                                          |
| 2166 | Q4LE39           | 4                    | 4              | 3.1                   | 1312   | 147809 | 5.1  | AT-rich interactive domain-containing protein 4B                                                                             |
| 2167 | Q9H7M7           | 4                    | 5              | 3.3                   | 1415   | 148907 | 4.7  | FLJ00043 protein                                                                                                             |
| 2167 | Q8N3D4           | 4                    | 5              | 3.1                   | 1510   | 160311 | 4.8  | EH domain-binding protein 1-like protein 1                                                                                   |
| 2167 | UPI000013EE70    | 4                    | 5              | 3.1                   | 1510   | 160283 | 4.8  | Signal-induced proliferation-associated protein 1 (Sipa-1) (GTPase- activating protein Spa-1) (p130 SPA-1).                  |
| 2168 | P48634           | 4                    | 5              | 2.8                   | 2157   | 228858 | 9.5  | Large proline-rich protein BAT2                                                                                              |
| 2168 | UPI000020E69E    | 4                    | 5              | 2.8                   | 2157   | 228829 | 9.5  | Large proline-rich protein BAT2 (HLA-B-associated transcript 2).                                                             |
| 2168 | UPI000020E56F    | 4                    | 5              | 2.8                   | 2157   | 228861 | 9.5  | HLA-B associated transcript 2 (BAT2), transcript variant 1, mRNA                                                             |
| 2168 | UPI00000703A1    | 4                    | 5              | 2.8                   | 2157   | 228869 | 9.5  | HLA-B associated transcript-2 isoform a                                                                                      |
| 2168 | Q05BK4           | 4                    | 5              | 2.8                   | 2157   | 228706 | 9.4  | BAT2 protein                                                                                                                 |
| 2169 | Q8TER5           | 4                    | 5              | 2.8                   | 1546   | 167672 | 6.4  | FLJ00128 protein                                                                                                             |
| 2169 | UPI00001FCFB7    | 4                    | 5              | 2.8                   | 1519   | 164657 | 6.1  | hypothetical protein LOC55701                                                                                                |
| 2170 | UPI00004577B6    | 4                    | 8              | 2.9                   | 1638   | 182237 | 6.9  | nucleoporin 188kDa                                                                                                           |
| 2170 | Q7Z3K8           | 4                    | 8              | 2.9                   | 1639   | 182478 | 6.9  | Hypothetical protein DKFZp686L1653                                                                                           |
| 2170 | Q14675           | 4                    | 8              | 2.7                   | 1745   | 195697 | 6.7  | KIAA0169 protein                                                                                                             |
| 2170 | Q5SRE5           | 4                    | 8              | 2.7                   | 1749   | 196041 | 6.7  | 188 kDa nucleoporin                                                                                                          |
| 2171 | Q5VVH4           | 4                    | 4              | 2.7                   | 1821   | 206688 | 8.8  | Pleckstrin homology domain-interacting protein                                                                               |
| 2171 | Q8WWQ0           | 4                    | 4              | 2.7                   | 1821   | 206646 | 8.8  | WD repeat domain 11 protein                                                                                                  |
| 2172 | Q75R47           | 4                    | 4              | 2.7                   | 2091   | 213689 | 7.5  | KIAA0023 splice variant 1                                                                                                    |
| 2173 | A1IGE7           | 4                    | 5              | 2.3                   | 1843   | 212619 | 6    | PKB/Akt-binding protein                                                                                                      |
| 2174 | Q9BTC0           | 4                    | 8              | 2.3                   | 2240   | 243870 | 7.9  | Death-inducer obliterator 1                                                                                                  |
| 2174 | UPI000056322E    | 4                    | 8              | 2.3                   | 2240   | 243840 | 7.9  | death inducer-obliterator 1 isoform c                                                                                        |
| 2175 | UPI0000D61F29    | 4                    | 9              | 2.3                   | 2107   | 239160 | 6.8  | Dedicator of cytokinesis protein 7.                                                                                          |
| 2175 | Q96N67-6         | 4                    | 9              | 2.3                   | 2131   | 241670 | 6.8  | Isoform 6 of Q96N67                                                                                                          |
| 2175 | Q96N67-5         | 4                    | 9              | 2.3                   | 2109   | 239420 | 6.8  | Isoform 5 of Q96N67                                                                                                          |
| 2175 | Q96N67-4         | 4                    | 9              | 2.3                   | 2098   | 238272 | 6.8  | Isoform 4 of Q96N67                                                                                                          |
| 2175 | Q96N67-3         | 4                    | 9              | 2.3                   | 2100   | 238532 | 6.8  | Isoform 3 of Q96N67                                                                                                          |
| 2175 | Q96N67-2         | 4                    | 9              | 2.3                   | 2129   | 241410 | 6.8  | Isoform 2 of Q96N67                                                                                                          |
| 2175 | Q96N67           | 4                    | 9              | 2.2                   | 2140   | 242558 | 6.8  | Dedicator of cytokinesis protein 7                                                                                           |
| 2176 | UPI000034ECE6    | 4                    | 10             | 1.5                   | 3097   | 346901 | 6.4  | triple functional domain (PTPRF interacting)                                                                                 |
| 2177 | P61960           | 3                    | 7              | 60                    | 85     | 9118   | 9.3  | Ubiquitin-fold modifier 1 precursor                                                                                          |
| 2178 | UPI0000D621E1    | 3                    | 34             | 58.9                  | 448    | 49764  | 5.1  | Tubulin alpha-6 chain (Alpha-tubulin 6).                                                                                     |
| 2178 | Q53GA7           | 3                    | 34             | 58.8                  | 449    | 49823  | 5.1  | Tubulin alpha 6 variant                                                                                                      |
| 2178 | Q9BQE3           | 3                    | 34             | 58.8                  | 449    | 49895  | 5.1  | Tubulin alpha-6 chain                                                                                                        |
| 2179 | P61204           | 3                    | 43             | 53.6                  | 181    | 20601  | 7.4  | ADP-ribosylation factor 3                                                                                                    |
| 2179 | P84077           | 3                    | 43             | 53.6                  | 181    | 20697  | 6.8  | ADP-ribosylation factor 1                                                                                                    |
| 2180 | Q9H3K6           | 3                    | 11             | 51.2                  | 86     | 10117  | 6.5  | BolA-like protein 2                                                                                                          |
| 2181 | O95167           | 3                    | 10             | 50                    | 84     | 9279   | 8.5  | NADH dehydrogenase [ubiquinone] 1 alpha subcomplex subunit 3                                                                 |
| 2182 | Q9UBI6           | 3                    | 40             | 47.2                  | 72     | 8006   | 9    | Guanine nucleotide-binding protein G(I)/G(S)/G(O) gamma-12 subunit precursor                                                 |
| 2183 | A0JCS1           | 3                    | 12             | 46.9                  | 273    | 31682  | 5.8  | MHC class I antigen                                                                                                          |
| 2184 | P62857           | 3                    | 26             | 46.4                  | 69     | 7841   | 10.7 | 40S ribosomal protein S28                                                                                                    |
| 2184 | UPI000013E08B    | 3                    | 26             | 46.4                  | 69     | 7823   | 10.7 | ribosomal protein S28 (RPS28), mRNA                                                                                          |

| No.  | Accession Number | Unique Peptide Count | Spectrum Count | Sequence Coverage (%) | Length | MolWt | pI   | Descriptive Name                                                                       |
|------|------------------|----------------------|----------------|-----------------------|--------|-------|------|----------------------------------------------------------------------------------------|
| 2185 | Q9Y281           | 3                    | 8              | 45.2                  | 166    | 18737 | 7.9  | Cofilin-2                                                                              |
| 2186 | P61513           | 3                    | 30             | 42.4                  | 92     | 10275 | 10.4 | 60S ribosomal protein L37a                                                             |
| 2187 | Q9BTM1           | 3                    | 138            | 41.9                  | 129    | 14019 | 10.9 | H2A histone family, member J                                                           |
| 2188 | Q92930           | 3                    | 5              | 41.5                  | 207    | 23584 | 9.1  | Ras-related protein Rab-8B                                                             |
| 2189 | P0C0S5           | 3                    | 31             | 40.6                  | 128    | 13553 | 10.6 | Histone H2A.Z                                                                          |
| 2189 | Q71UI9           | 3                    | 31             | 40.6                  | 128    | 13509 | 10.6 | Histone H2AV                                                                           |
| 2190 | P04271           | 3                    | 15             | 40.2                  | 92     | 10713 | 4.6  | Protein S100-B                                                                         |
| 2191 | O15523           | 3                    | 4              | 40                    | 660    | 73154 | 7.6  | ATP-dependent RNA helicase DDX3Y                                                       |
| 2192 | P18859           | 3                    | 9              | 39.8                  | 108    | 12587 | 9.5  | ATP synthase coupling factor 6, mitochondrial precursor                                |
| 2193 | Q9Y3D7           | 3                    | 4              | 39.2                  | 125    | 13825 | 9.7  | Mitochondrial import inner membrane translocase subunit TIM16                          |
| 2194 | Q9BWJ5           | 3                    | 14             | 38.4                  | 86     | 10135 | 6.4  | Splicing factor 3B subunit 5                                                           |
| 2195 | O00244           | 3                    | 6              | 38.2                  | 68     | 7402  | 7.2  | Copper transport protein ATOX1                                                         |
| 2195 | UPI0000D6169C    | 3                    | 6              | 38.2                  | 68     | 7449  | 7.2  | Copper transport protein ATOX1 (Metal transport protein ATX1).                         |
| 2195 | Q6IBA3           | 3                    | 6              | 38.2                  | 68     | 7388  | 7.2  | ATOX1 protein                                                                          |
| 2196 | Q9Y5J7           | 3                    | 7              | 38.2                  | 89     | 10378 | 7.2  | Mitochondrial import inner membrane translocase subunit Tim9                           |
| 2197 | Q96B45           | 3                    | 5              | 38.1                  | 105    | 11564 | 6.8  | Uncharacterized protein C10orf32                                                       |
| 2198 | P35244           | 3                    | 12             | 37.2                  | 121    | 13569 | 5.1  | Replication protein A 14 kDa subunit                                                   |
| 2199 | O15116           | 3                    | 8              | 36.8                  | 133    | 15179 | 5.2  | U6 snRNA-associated Sm-like protein LSm1                                               |
| 2200 | P14174           | 3                    | 12             | 36.5                  | 115    | 12476 | 7.9  | Macrophage migration inhibitory factor                                                 |
| 2201 | Q99622           | 3                    | 8              | 36.5                  | 126    | 13178 | 5.1  | Putative C10 protein                                                                   |
| 2202 | Q86Y39           | 3                    | 6              | 36.2                  | 141    | 14852 | 8.7  | NADH dehydrogenase [ubiquinone] 1 alpha subcomplex subunit 11                          |
| 2203 | Q6FIE5           | 3                    | 5              | 35.2                  | 125    | 13792 | 6.1  | PHP14 protein                                                                          |
| 2203 | Q9NRX4           | 3                    | 5              | 35.2                  | 125    | 13833 | 6.1  | 14 kDa phosphohistidine phosphatase                                                    |
| 2203 | UPI0000DD5CDC    | 3                    | 5              | 30.6                  | 144    | 16144 | 6.4  | 14 kDa phosphohistidine phosphatase                                                    |
| 2204 | Q8WYJ5           | 3                    | 10             | 35.2                  | 128    | 13918 | 7    | Protein kinase C inhibitor-2                                                           |
| 2204 | Q9BX68           | 3                    | 10             | 27.6                  | 163    | 17162 | 9.1  | Histidine triad nucleotide-binding protein 2                                           |
| 2205 | Q3ZAQ7           | 3                    | 9              | 34.7                  | 101    | 11354 | 7.2  | Hypothetical protein LOC203547                                                         |
| 2206 | Q15843           | 3                    | 7              | 34.6                  | 81     | 9072  | 8.4  | NEDD8 precursor                                                                        |
| 2206 | UPI0000EFE33A    | 3                    | 7              | 34.6                  | 81     | 8905  | 7.2  | NEDD8                                                                                  |
| 2207 | P63027           | 3                    | 30             | 34.5                  | 116    | 12649 | 8.1  | Vesicle-associated membrane protein 2                                                  |
| 2207 | Q9N0Y0           | 3                    | 30             | 34.5                  | 116    | 12663 | 8.1  | Vesicle-associated membrane protein 2                                                  |
| 2208 | Q9Y547           | 3                    | 6              | 33.3                  | 144    | 16297 | 5    | Placental protein 25                                                                   |
| 2209 | Q05639           | 3                    | 3              | 33                    | 463    | 50470 | 9    | Elongation factor 1-alpha 2                                                            |
| 2210 | Q5T179           | 3                    | 6              | 38.8                  | 67     | 8027  | 6.4  | CDC28 protein kinase regulatory subunit 1B                                             |
| 2210 | P61024           | 3                    | 6              | 32.9                  | 79     | 9660  | 8.9  | Cyclin-dependent kinases regulatory subunit 1                                          |
| 2210 | UPI0000161698    | 3                    | 6              | 32.9                  | 79     | 9660  | 8.7  | PREDICTED: similar to Cyclin-dependent kinases regulatory subunit 1 (CKS-1) (Sid 1334) |
| 2211 | P81605           | 3                    | 3              | 32.7                  | 110    | 11284 | 6.5  | Dermcidin precursor (Preproteolysin) [Contains: Survival-promoting peptide; DCD-1]     |
| 2212 | Q56VW3           | 3                    | 13             | 32.6                  | 175    | 19800 | 6.6  | Transformation-related gene 7                                                          |
| 2212 | Q7Z7H5           | 3                    | 13             | 25.1                  | 227    | 25943 | 8.3  | Transmembrane emp24 domain-containing protein 4 precursor                              |
| 2212 | UPI0000D61C37    | 3                    | 13             | 24.9                  | 229    | 26170 | 8.6  | Transmembrane emp24 domain-containing protein 4 precursor.                             |
| 2213 | Q5JTJ3-3         | 3                    | 4              | 50.6                  | 79     | 9428  | 7.7  | Isoform 3 of Q5JTJ3                                                                    |
| 2213 | Q5JTJ3           | 3                    | 4              | 32                    | 125    | 14116 | 8.3  | Uncharacterized protein C1orf31                                                        |
| 2213 | UPI00001D7D6B    | 3                    | 4              | 25.8                  | 155    | 18007 | 10.1 | Novel protein.                                                                         |
| 2213 | Q5JTJ3-2         | 3                    | 4              | 25.6                  | 156    | 18094 | 10.1 | Isoform 2 of Q5JTJ3                                                                    |
| 2214 | P62318           | 3                    | 25             | 31.7                  | 126    | 13916 | 10.3 | Small nuclear ribonucleoprotein Sm D3                                                  |
| 2215 | Q9Y6H1           | 3                    | 3              | 31.1                  | 151    | 15513 | 9.2  | Coiled-coil-helix-coiled-coil-helix domain-containing protein 2                        |
| 2216 | Q9BUE6           | 3                    | 4              | 31                    | 129    | 14179 | 9.1  | Iron-sulfur cluster assembly 1 homolog, mitochondrial precursor                        |
| 2216 | UPI0000141215    | 3                    | 4              | 31                    | 129    | 14177 | 9.1  | OTTHUMP00000021591.                                                                    |
| 2217 | Q8N4V1           | 3                    | 9              | 30.5                  | 131    | 14686 | 9.1  | Transmembrane protein 32                                                               |
| 2218 | Q9Y3E2           | 3                    | 4              | 29.9                  | 137    | 14289 | 8    | Bola-like protein 1                                                                    |
| 2219 | UPI0000158C34    | 3                    | 5              | 45                    | 100    | 10905 | 4.5  | PREDICTED: similar to basic transcription factor 3-like 4                              |
| 2219 | UPI0000D61F1B    | 3                    | 5              | 29.6                  | 152    | 16409 | 5.6  | Transcription factor BTF3 homolog 4 (Basic transcription factor 3-like 4).             |
| 2219 | Q6PJ77           | 3                    | 5              | 29.4                  | 153    | 16470 | 5.6  | BTF3L4 protein                                                                         |
| 2219 | Q96K17           | 3                    | 5              | 28.5                  | 158    | 17271 | 6.4  | Transcription factor BTF3 homolog 4                                                    |
| 2220 | O43920           | 3                    | 16             | 29.2                  | 106    | 12517 | 9.1  | NADH dehydrogenase [ubiquinone] iron-sulfur protein 5                                  |
| 2221 | P60468           | 3                    | 73             | 29.2                  | 96     | 9974  | 11.6 | Protein transport protein Sec61 subunit beta                                           |
| 2222 | O60783           | 3                    | 7              | 28.9                  | 128    | 15139 | 11.4 | Mitochondrial 28S ribosomal protein S14                                                |
| 2223 | O43676           | 3                    | 22             | 28.6                  | 98     | 11402 | 9.2  | NADH dehydrogenase [ubiquinone] 1 beta subcomplex subunit 3                            |
| 2224 | P62273           | 3                    | 9              | 28.6                  | 56     | 6677  | 10.1 | 40S ribosomal protein S29                                                              |
| 2225 | P09132           | 3                    | 9              | 28.5                  | 144    | 16156 | 9.8  | Signal recognition particle 19 kDa protein                                             |
| 2226 | Q9NQP4           | 3                    | 6              | 28.4                  | 134    | 15314 | 4.5  | Prefoldin subunit 4                                                                    |
| 2227 | Q9BX83           | 3                    | 3              | 40                    | 100    | 10710 | 7.7  | Hemoglobin alpha 1 globin chain                                                        |
| 2227 | P69905           | 3                    | 3              | 28.2                  | 142    | 15258 | 8.7  | Hemoglobin subunit alpha                                                               |
| 2227 | Q53F97           | 3                    | 3              | 28.2                  | 142    | 15281 | 8.7  | Alpha 2 globin variant                                                                 |



| No.  | Accession Number | Unique Peptide Count | Spectrum Count | Sequence Coverage (%) | Length | MolWt | pI   | Descriptive Name                                                                      |
|------|------------------|----------------------|----------------|-----------------------|--------|-------|------|---------------------------------------------------------------------------------------|
| 2227 | Q1HDT5           | 3                    | 3              | 28.2                  | 142    | 15272 | 9    | Hemoglobin alpha 1-2 hybrid                                                           |
| 2228 | Q6VUD0           | 3                    | 8              | 29.1                  | 117    | 12976 | 8.3  | Endosulfine-alpha variant 3                                                           |
| 2228 | Q6NUL2           | 3                    | 8              | 29.1                  | 117    | 12961 | 8.3  | Endosulfine alpha                                                                     |
| 2228 | Q6IAM4           | 3                    | 8              | 29.1                  | 117    | 12976 | 7.2  | ENSA protein                                                                          |
| 2228 | O43768           | 3                    | 8              | 28.1                  | 121    | 13389 | 7.2  | Alpha-endosulfine                                                                     |
| 2228 | Q6VUC9           | 3                    | 8              | 24.8                  | 137    | 15281 | 6    | Endosulfine-alpha variant 2                                                           |
| 2228 | UPI0000D61FE3    | 3                    | 8              | 24.3                  | 140    | 15634 | 8.3  | Alpha-endosulfine (ARPP-19e).                                                         |
| 2228 | Q68D48           | 3                    | 8              | 24.3                  | 140    | 15534 | 8.7  | Hypothetical protein DKFZp779B2258                                                    |
| 2228 | Q5T5H1           | 3                    | 8              | 18.2                  | 187    | 20994 | 7.8  | Endosulfine alpha                                                                     |
| 2229 | Q8NI22           | 3                    | 5              | 28.1                  | 146    | 16390 | 4.6  | Multiple coagulation factor deficiency protein 2 precursor                            |
| 2230 | Q86SX6           | 3                    | 12             | 28                    | 157    | 16628 | 6.8  | Glutaredoxin-related protein 5                                                        |
| 2231 | O95295           | 3                    | 3              | 27.9                  | 136    | 14874 | 9.3  | SNARE-associated protein Snapin                                                       |
| 2232 | Q7Z6L8           | 3                    | 5              | 34.3                  | 245    | 28385 | 4.8  | Tropomyosin 1                                                                         |
| 2232 | Q59GR8           | 3                    | 5              | 27.7                  | 303    | 34402 | 5.4  | TPM1 protein variant                                                                  |
| 2233 | Q8N111           | 3                    | 14             | 27.5                  | 149    | 14954 | 9.2  | Cell cycle exit and neuronal differentiation protein 1                                |
| 2234 | Q5HYD9           | 3                    | 7              | 37.4                  | 107    | 11873 | 4.8  | Hypothetical protein DKFZp686M0619                                                    |
| 2234 | O43169           | 3                    | 7              | 27.4                  | 146    | 16332 | 5    | Cytochrome b5 type B precursor                                                        |
| 2235 | P42025           | 3                    | 8              | 27.1                  | 376    | 42293 | 6.4  | Beta-centractin                                                                       |
| 2236 | Q53HB4           | 3                    | 7              | 26.9                  | 160    | 18995 | 5.3  | M-phase phosphoprotein 6 variant                                                      |
| 2236 | UPI00001AE7AB    | 3                    | 7              | 26.9                  | 160    | 19024 | 5.2  | M-phase phosphoprotein 6                                                              |
| 2236 | Q99547           | 3                    | 7              | 26.9                  | 160    | 18996 | 5.2  | M-phase phosphoprotein 6                                                              |
| 2237 | Q9NVP2           | 3                    | 4              | 26.7                  | 202    | 22434 | 4.6  | Histone chaperone ASF1B                                                               |
| 2238 | P61803           | 3                    | 30             | 26.5                  | 113    | 12497 | 7.1  | Dolichyl-diphosphooligosaccharide--protein glycosyltransferase subunit DAD1           |
| 2239 | O75607           | 3                    | 7              | 26.4                  | 178    | 19344 | 4.6  | Nucleoplasm-3                                                                         |
| 2240 | O75817           | 3                    | 5              | 26.4                  | 140    | 15651 | 8.9  | Ribonuclease P protein subunit p20                                                    |
| 2241 | Q7Z4G1           | 3                    | 6              | 38.8                  | 85     | 9638  | 6    | COMM domain-containing protein 6                                                      |
| 2241 | UPI000034ECDC    | 3                    | 6              | 33.7                  | 98     | 10908 | 6    | COMM domain containing 6 isoform a                                                    |
| 2241 | Q5TBK3           | 3                    | 6              | 26.4                  | 125    | 14211 | 9.8  | COMM domain containing 6                                                              |
| 2241 | UPI0000D61A83    | 3                    | 6              | 26.4                  | 125    | 14257 | 9.8  | COMM domain-containing protein 6.                                                     |
| 2242 | Q9NUG6           | 3                    | 3              | 26.3                  | 133    | 15511 | 6    | p53 and DNA damage-regulated protein 1                                                |
| 2243 | Q9Y3C0           | 3                    | 4              | 26.3                  | 194    | 21173 | 4.5  | Coiled-coil domain-containing protein 53                                              |
| 2244 | Q53GP2           | 3                    | 3              | 26.2                  | 149    | 16989 | 6.3  | Thioredoxin-like 4B variant                                                           |
| 2244 | Q9NX01           | 3                    | 3              | 26.2                  | 149    | 17015 | 6    | Thioredoxin-like protein 4B                                                           |
| 2245 | P17677           | 3                    | 3              | 26.1                  | 238    | 24803 | 4.7  | Neuromodulin                                                                          |
| 2246 | P53999           | 3                    | 22             | 26                    | 127    | 14395 | 9.6  | Activated RNA polymerase II transcriptional coactivator p15                           |
| 2246 | UPI000006EEC7    | 3                    | 22             | 26                    | 127    | 14365 | 9.6  | activated RNA polymerase II transcription cofactor 4                                  |
| 2246 | Q59G24           | 3                    | 22             | 24.6                  | 134    | 15135 | 9.4  | Activated RNA polymerase II transcription cofactor 4 variant                          |
| 2247 | P68014           | 3                    | 8              | 26                    | 146    | 15808 | 8.4  | Hemoglobin subunit delta                                                              |
| 2248 | UPI000059DB3B    | 3                    | 6              | 26.6                  | 158    | 18342 | 7.3  | Sorting nexin-12.                                                                     |
| 2248 | Q3SYF1           | 3                    | 6              | 25.9                  | 162    | 18885 | 8.4  | Sorting nexin 12                                                                      |
| 2248 | UPI0000D61D89    | 3                    | 6              | 24.4                  | 172    | 19819 | 7.8  | Sorting nexin-12.                                                                     |
| 2248 | Q9UMY4           | 3                    | 6              | 24.4                  | 172    | 19730 | 7.9  | Sorting nexin-12                                                                      |
| 2249 | Q9NX14           | 3                    | 3              | 26.8                  | 153    | 17317 | 5.2  | NADH dehydrogenase [ubiquinone] 1 beta subcomplex subunit 11, mitochondrial precursor |
| 2249 | Q7Z4X2           | 3                    | 3              | 25.9                  | 158    | 17942 | 5.4  | Neuronal protein                                                                      |
| 2249 | Q9NX14-2         | 3                    | 3              | 25.2                  | 163    | 18364 | 5.2  | Isoform 2 of Q9NX14                                                                   |
| 2250 | UPI0000E200C7    | 3                    | 5              | 31.6                  | 95     | 10300 | 10.5 | PREDICTED: translocase of the inner mitochondrial membrane 14 isoform 1               |
| 2250 | Q96DA6           | 3                    | 5              | 25.9                  | 116    | 12499 | 10.1 | Mitochondrial import inner membrane translocase subunit TIM14                         |
| 2251 | Q3SZ52           | 3                    | 7              | 38.8                  | 147    | 16495 | 8    | Ubiquitin-conjugating enzyme E2 variant 1                                             |
| 2251 | Q13404-7         | 3                    | 7              | 33.5                  | 170    | 19307 | 8.5  | Isoform 7 of Q13404                                                                   |
| 2251 | Q13404-2         | 3                    | 7              | 33.5                  | 170    | 19228 | 8.2  | Isoform 2 of Q13404                                                                   |
| 2251 | Q13404           | 3                    | 7              | 25.8                  | 221    | 25797 | 8.3  | Ubiquitin-conjugating enzyme E2 variant 1                                             |
| 2251 | UPI0000233611    | 3                    | 7              | 15.4                  | 370    | 42210 | 6.6  | ubiquitin-conjugating enzyme E2 Kua-UEV isoform 1                                     |
| 2252 | Q9NP97           | 3                    | 12             | 39.6                  | 96     | 10922 | 7.2  | Dynein light chain roadblock-type 1                                                   |
| 2252 | Q5TC71           | 3                    | 12             | 25.7                  | 148    | 16253 | 7    | Dynein, light chain, roadblock-type 1                                                 |
| 2253 | P17568           | 3                    | 6              | 25.5                  | 137    | 16402 | 8.9  | NADH dehydrogenase [ubiquinone] 1 beta subcomplex subunit 7                           |
| 2254 | A2ABE5           | 3                    | 7              | 25                    | 368    | 41206 | 6.6  | Major histocompatibility complex, class I, C                                          |
| 2254 | A2ABE6           | 3                    | 7              | 24.7                  | 372    | 41363 | 6    | Major histocompatibility complex, class I, C                                          |
| 2254 | A2ABE7           | 3                    | 7              | 23.2                  | 397    | 44216 | 7    | Major histocompatibility complex, class I, C                                          |
| 2255 | Q6GMV3           | 3                    | 8              | 25                    | 140    | 15805 | 9.1  | Similar to CG14903-PA                                                                 |
| 2256 | UPI0000509F05    | 3                    | 4              | 25.4                  | 169    | 19805 | 4.7  | TAF9 RNA polymerase II isoform c                                                      |
| 2256 | Q9Y3D8           | 3                    | 4              | 25                    | 172    | 20061 | 4.6  | Adenylate kinase isoenzyme 6                                                          |
| 2257 | P32321           | 3                    | 5              | 24.7                  | 178    | 20016 | 7.6  | Deoxycytidylate deaminase                                                             |
| 2257 | Q5M7Z8           | 3                    | 5              | 23.3                  | 189    | 21014 | 7.5  | DCMP deaminase                                                                        |
| 2258 | O75348           | 3                    | 10             | 24.6                  | 118    | 13758 | 8.8  | Vacuolar ATP synthase subunit G 1                                                     |
| 2259 | P45973           | 3                    | 6              | 24.6                  | 191    | 22225 | 5.9  | Chromobox protein homolog 5                                                           |
| 2260 | P98179           | 3                    | 33             | 24.2                  | 157    | 17170 | 8.9  | Putative RNA-binding protein 3                                                        |
| 2261 | Q3KRA6           | 3                    | 3              | 23.8                  | 126    | 14609 | 6.9  | LOC130355 protein                                                                     |
| 2261 | Q4VC35           | 3                    | 3              | 23.8                  | 126    | 14623 | 6.9  | Hypothetical protein LOC130355                                                        |
| 2262 | Q9Y2V2           | 3                    | 4              | 23.8                  | 147    | 15892 | 8.2  | Calcium-regulated heat stable protein 1                                               |
| 2263 | P54725           | 3                    | 3              | 23.7                  | 363    | 39609 | 4.6  | UV excision repair protein RAD23 homolog A                                            |
| 2263 | Q59EU8           | 3                    | 3              | 22.7                  | 379    | 41256 | 4.7  | UV excision repair protein RAD23 homolog A variant                                    |

| No.  | Accession Number | Unique Peptide Count | Spectrum Count | Sequence Coverage (%) | Length | MolWt | pI   | Descriptive Name                                                                                                                                                             |
|------|------------------|----------------------|----------------|-----------------------|--------|-------|------|------------------------------------------------------------------------------------------------------------------------------------------------------------------------------|
| 2264 | O60613           | 3                    | 13             | 23.5                  | 162    | 17743 | 5    | 15 kDa selenoprotein precursor                                                                                                                                               |
| 2264 | UPI000034ECC1    | 3                    | 13             | 23                    | 165    | 17942 | 5    | 15 kDa selenoprotein isoform 1 precursor                                                                                                                                     |
| 2265 | Q9P299           | 3                    | 12             | 23.3                  | 210    | 23548 | 5.2  | Coatomer subunit zeta-2                                                                                                                                                      |
| 2266 | Q96AB3           | 3                    | 3              | 22.9                  | 205    | 22337 | 7.8  | Isochorismatase domain-containing protein 2, mitochondrial precursor                                                                                                         |
| 2266 | Q96AB3-2         | 3                    | 3              | 21.3                  | 221    | 24097 | 7.8  | Isoform 2 of Q96AB3                                                                                                                                                          |
| 2267 | P30049           | 3                    | 13             | 22.6                  | 168    | 17490 | 5.5  | ATP synthase delta chain, mitochondrial precursor                                                                                                                            |
| 2268 | P61923           | 3                    | 15             | 22.6                  | 177    | 20198 | 4.8  | Coatomer subunit zeta-1                                                                                                                                                      |
| 2268 | Q53FU3           | 3                    | 15             | 22.6                  | 177    | 20267 | 4.9  | Coatomer protein complex, subunit zeta 1 variant                                                                                                                             |
| 2269 | P20962           | 3                    | 62             | 22.5                  | 102    | 11530 | 4.2  | Parathyrosin                                                                                                                                                                 |
| 2270 | Q9Y530           | 3                    | 4              | 22.4                  | 152    | 17025 | 8.3  | Uncharacterized protein C6orf130                                                                                                                                             |
| 2270 | UPI00001415EB    | 3                    | 4              | 21.7                  | 157    | 17607 | 8.3  | Uncharacterized protein C6orf130.                                                                                                                                            |
| 2271 | Q9BQQ5           | 3                    | 29             | 31.1                  | 106    | 12015 | 11.5 | Ribosomal protein L27a                                                                                                                                                       |
| 2271 | P46776           | 3                    | 29             | 22.3                  | 148    | 16561 | 11   | 60S ribosomal protein L27a                                                                                                                                                   |
| 2271 | UPI0000160A16    | 3                    | 29             | 22.3                  | 148    | 16622 | 11.1 | PREDICTED: similar to 60S ribosomal protein L27a                                                                                                                             |
| 2271 | Q6NZ52           | 3                    | 29             | 22.3                  | 148    | 16478 | 11   | Ribosomal protein L27a                                                                                                                                                       |
| 2272 | P54652           | 3                    | 6              | 22.2                  | 639    | 70021 | 5.7  | Heat shock-related 70 kDa protein 2                                                                                                                                          |
| 2273 | Q9BRX5           | 3                    | 3              | 22.2                  | 216    | 24535 | 5.3  | GINS complex subunit 3                                                                                                                                                       |
| 2273 | UPI0000D619FA    | 3                    | 3              | 22                    | 218    | 24719 | 5.3  | GINS complex subunit 3 (Psf3 homolog)                                                                                                                                        |
| 2274 | P09417           | 3                    | 9              | 22.1                  | 244    | 25789 | 7.4  | Dihydropteridine reductase                                                                                                                                                   |
| 2274 | UPI000004C79F    | 3                    | 9              | 22.1                  | 244    | 25804 | 7.4  | quinoid dihydropteridine reductase                                                                                                                                           |
| 2275 | Q9UDC2           | 3                    | 33             | 23.7                  | 135    | 15812 | 10.4 | RIG homolog                                                                                                                                                                  |
| 2275 | P62841           | 3                    | 33             | 22.1                  | 145    | 17040 | 10.4 | 40S ribosomal protein S15                                                                                                                                                    |
| 2276 | Q5TZN6           | 3                    | 3              | 23.1                  | 208    | 22629 | 4.2  | Nucleolar protein 3                                                                                                                                                          |
| 2276 | O60936           | 3                    | 3              | 21.9                  | 219    | 24327 | 11.3 | Nucleolar protein 3                                                                                                                                                          |
| 2277 | P63302           | 3                    | 4              | 21.8                  | 87     | 9401  | 9.1  | Selenoprotein W                                                                                                                                                              |
| 2277 | UPI0000161B36    | 3                    | 4              | 21.8                  | 87     | 9298  | 9.2  | selenoprotein W, 1                                                                                                                                                           |
| 2277 | UPI0000456CEF    | 3                    | 4              | 21.3                  | 89     | 9561  | 8.9  | Selenoprotein W.                                                                                                                                                             |
| 2278 | Q9P0S2           | 3                    | 3              | 21.7                  | 106    | 12293 | 9.5  | COX16-like protein C14orf112, mitochondrial precursor                                                                                                                        |
| 2279 | Q9UMX5           | 3                    | 4              | 21.5                  | 172    | 18856 | 5.7  | Neudesin precursor                                                                                                                                                           |
| 2280 | P63272           | 3                    | 4              | 21.4                  | 117    | 13193 | 8.1  | Transcription elongation factor SPT4                                                                                                                                         |
| 2281 | Q93096           | 3                    | 3              | 21.4                  | 173    | 19815 | 9    | Protein tyrosine phosphatase type IVA protein 1 (EC 3.1.3.48) (Protein-tyrosine phosphatase 4a1) (Protein-tyrosine phosphatase of regenerating liver 1) (PRL-1) (PTP(CAAXI)) |
| 2282 | Q9UKK6           | 3                    | 5              | 21.4                  | 140    | 15847 | 5    | NTF2-related export protein 1                                                                                                                                                |
| 2283 | Q9H5X1           | 3                    | 4              | 21.2                  | 160    | 18355 | 4.9  | Protein FAM96A                                                                                                                                                               |
| 2284 | Q9Y3C6           | 3                    | 8              | 21.1                  | 166    | 18237 | 8    | Peptidyl-prolyl cis-trans isomerase-like 1                                                                                                                                   |
| 2285 | UPI000013C8D5    | 3                    | 3              | 21.1                  | 166    | 17870 | 9.6  | Iron-sulfur cluster assembly enzyme ISCU, mitochondrial precursor (NifU-like N-terminal domain-containing protein) (NifU-like protein).                                      |
| 2285 | Q9H1K1           | 3                    | 3              | 21                    | 167    | 17937 | 9.5  | Iron-sulfur cluster assembly enzyme ISCU, mitochondrial precursor                                                                                                            |
| 2285 | UPI000021CA9A    | 3                    | 3              | 21                    | 167    | 17999 | 9.5  | iron-sulfur cluster assembly enzyme isoform ISCU2 precursor                                                                                                                  |
| 2286 | Q86YS6           | 3                    | 3              | 20.8                  | 212    | 23339 | 5.7  | Ras-related protein Rab-43                                                                                                                                                   |
| 2287 | O14582           | 3                    | 4              | 20.7                  | 140    | 16445 | 6.5  | Trafficking protein particle complex subunit 2                                                                                                                               |
| 2287 | UPI0000457806    | 3                    | 4              | 20.1                  | 144    | 17020 | 6.5  | Trafficking protein particle complex subunit 2 (Sedlin) (MBP-1- interacting protein 2A) (MIP-2A).                                                                            |
| 2287 | O14582-2         | 3                    | 4              | 19.7                  | 147    | 17260 | 6.7  | Isoform 2 of O14582                                                                                                                                                          |
| 2288 | Q96NT0           | 3                    | 4              | 20.6                  | 180    | 19761 | 7    | Coiled-coil domain-containing protein 115                                                                                                                                    |
| 2289 | P51151           | 3                    | 5              | 20.4                  | 201    | 22838 | 5.5  | Ras-related protein Rab-9                                                                                                                                                    |
| 2290 | P82664           | 3                    | 5              | 20.4                  | 201    | 22999 | 8    | Mitochondrial 28S ribosomal protein S10                                                                                                                                      |
| 2291 | Q9HBL7           | 3                    | 8              | 20.4                  | 147    | 17201 | 9.6  | Uncharacterized protein C9orf46                                                                                                                                              |
| 2291 | UPI0000073DFC    | 3                    | 8              | 20.4                  | 147    | 17229 | 9.7  | hypothetical protein LOC55848                                                                                                                                                |
| 2292 | Q9HD47           | 3                    | 3              | 20.4                  | 186    | 20448 | 4.9  | MOG1 isoform A                                                                                                                                                               |
| 2293 | Q9UM00-2         | 3                    | 27             | 22.5                  | 169    | 18766 | 9.6  | Isoform 2 of Q9UM00                                                                                                                                                          |
| 2293 | Q9UM00           | 3                    | 27             | 20.2                  | 188    | 21175 | 9.7  | Transmembrane and coiled-coil domain-containing protein 1                                                                                                                    |
| 2294 | A2TDT2           | 3                    | 5              | 19.7                  | 157    | 18221 | 6.5  | Mutant B-cell CLL/lymphoma 10                                                                                                                                                |
| 2294 | O95999           | 3                    | 5              | 13.3                  | 233    | 26252 | 5.8  | B-cell lymphoma/leukemia 10                                                                                                                                                  |
| 2295 | O75915           | 3                    | 38             | 19.7                  | 188    | 21615 | 9.8  | PRA1 family protein 3                                                                                                                                                        |
| 2296 | Q9BQE4           | 3                    | 4              | 19.6                  | 189    | 21116 | 9.6  | Selenoprotein S                                                                                                                                                              |
| 2296 | UPI00001B2973    | 3                    | 4              | 19.6                  | 189    | 21013 | 9.7  | selenoprotein S                                                                                                                                                              |
| 2297 | Q13795           | 3                    | 3              | 19.4                  | 201    | 22614 | 7.6  | ADP-ribosylation factor-related protein 1                                                                                                                                    |
| 2298 | Q32P46           | 3                    | 5              | 19.3                  | 166    | 18205 | 9.7  | Mitochondrial ribosomal protein L11                                                                                                                                          |
| 2298 | Q9Y3B7           | 3                    | 5              | 16.7                  | 192    | 20683 | 9.9  | 39S ribosomal protein L11, mitochondrial precursor                                                                                                                           |
| 2298 | Q53G19           | 3                    | 5              | 16.7                  | 192    | 20655 | 9.9  | Mitochondrial ribosomal protein L11 isoform a variant                                                                                                                        |
| 2299 | Q8WVJ2           | 3                    | 7              | 19.1                  | 157    | 17676 | 5.1  | NudC domain-containing protein 2                                                                                                                                             |
| 2300 | Q9NX08           | 3                    | 7              | 19.1                  | 183    | 21090 | 5.4  | COMM domain-containing protein 8                                                                                                                                             |
| 2301 | P55327           | 3                    | 9              | 19                    | 184    | 19863 | 5    | Tumor protein D52                                                                                                                                                            |
| 2301 | Q6FGS3           | 3                    | 9              | 19                    | 184    | 19847 | 5    | TPD52 protein                                                                                                                                                                |
| 2301 | UPI00005520F0    | 3                    | 9              | 16.9                  | 207    | 22477 | 5.4  | tumor protein D52 isoform 2                                                                                                                                                  |
| 2301 | UPI0000D624DE    | 3                    | 9              | 16.7                  | 209    | 22635 | 5.4  | Tumor protein D52 (N8 protein).                                                                                                                                              |
| 2301 | Q53EK8           | 3                    | 9              | 15.8                  | 222    | 23782 | 5.9  | N8 protein long isoform variant                                                                                                                                              |
| 2301 | Q86YZ2           | 3                    | 9              | 15.6                  | 224    | 24327 | 4.8  | Prostate and colon associated protein                                                                                                                                        |
| 2301 | UPI0000D624DF    | 3                    | 9              | 15.5                  | 226    | 24485 | 4.8  | Tumor protein D52 (N8 protein).                                                                                                                                              |

| No.  | Accession Number | Unique Peptide Count | Spectrum Count | Sequence Coverage (%) | Length | MolWt | pI   | Descriptive Name                                                                                                               |
|------|------------------|----------------------|----------------|-----------------------|--------|-------|------|--------------------------------------------------------------------------------------------------------------------------------|
| 2301 | Q9UCX8           | 3                    | 9              | 14.1                  | 248    | 26382 | 6.4  | N8 protein long isoform                                                                                                        |
| 2301 | UPI0000D624DD    | 3                    | 9              | 14                    | 250    | 26480 | 5.9  | Tumor protein D52 (N8 protein).                                                                                                |
| 2302 | Q561V4           | 3                    | 5              | 18.9                  | 169    | 19119 | 6.3  | COMMD2 protein                                                                                                                 |
| 2302 | Q86X83           | 3                    | 5              | 16.1                  | 199    | 22745 | 6.7  | COMM domain-containing protein 2                                                                                               |
| 2303 | Q9BU89           | 3                    | 3              | 18.9                  | 302    | 32904 | 4.8  | Deoxyhypusine hydroxylase                                                                                                      |
| 2304 | Q9NQ50           | 3                    | 8              | 18.9                  | 206    | 24490 | 9.6  | 39S ribosomal protein L40, mitochondrial precursor                                                                             |
| 2305 | Q9BW83           | 3                    | 4              | 18.8                  | 186    | 20480 | 5.4  | Putative GTP-binding protein RAY-like                                                                                          |
| 2305 | UPI000013C6D3    | 3                    | 4              | 18.7                  | 187    | 20424 | 5.6  | Putative GTP-binding protein RAY-like (Rab-like protein 4).                                                                    |
| 2306 | Q9Y3E0           | 3                    | 65             | 18.8                  | 138    | 15426 | 10.3 | Vesicle transport protein GOT1B                                                                                                |
| 2307 | Q9Y6G5           | 3                    | 4              | 18.8                  | 202    | 22966 | 6.5  | COMM domain-containing protein 10                                                                                              |
| 2308 | Q6MZY9           | 3                    | 5              | 18.6                  | 172    | 19092 | 6.5  | Hypothetical protein DKFZp686M14237                                                                                            |
| 2308 | UPI0000229DA7    | 3                    | 5              | 18.6                  | 172    | 19036 | 6.5  | CDNA FLJ11151 fis, clone PLACE1006883.                                                                                         |
| 2308 | UPI000013D1D1    | 3                    | 5              | 10.2                  | 314    | 35548 | 6.2  | CDNA FLJ11151 fis, clone PLACE1006883.                                                                                         |
| 2308 | Q9H9M9           | 3                    | 5              | 10.2                  | 314    | 35624 | 6.3  | CDNA FLJ12648 fis, clone NT2RM4002018                                                                                          |
| 2308 | Q9BRF8           | 3                    | 5              | 10.2                  | 314    | 35620 | 6.1  | Hypothetical protein FLJ11151                                                                                                  |
| 2309 | Q2QD04           | 3                    | 5              | 18.5                  | 222    | 23769 | 8.9  | RcUBE2S                                                                                                                        |
| 2309 | Q6NXQ4           | 3                    | 5              | 18.5                  | 222    | 23771 | 8.7  | UBE2S protein                                                                                                                  |
| 2310 | O43752           | 3                    | 5              | 18.4                  | 255    | 29176 | 4.9  | Syntaxin-6                                                                                                                     |
| 2311 | Q53GA4           | 3                    | 3              | 18.4                  | 152    | 17092 | 9.2  | Pleckstrin homology-like domain family A member 2                                                                              |
| 2312 | Q9BV86           | 3                    | 3              | 18.4                  | 223    | 25387 | 5.5  | UPF0351 protein C9orf32                                                                                                        |
| 2313 | P62330           | 3                    | 11             | 18.3                  | 175    | 20082 | 9    | ADP-ribosylation factor 6                                                                                                      |
| 2313 | Q5U025           | 3                    | 11             | 18.3                  | 175    | 20211 | 9    | ADP-ribosylation factor 6                                                                                                      |
| 2314 | Q659F8           | 3                    | 13             | 18.2                  | 225    | 23874 | 9    | Hypothetical protein DKFZp434F152                                                                                              |
| 2314 | Q9Y289           | 3                    | 13             | 6.5                   | 635    | 68702 | 8.3  | Sodium-dependent multivitamin transporter (Na(+)-dependent multivitamin transporter)                                           |
| 2314 | Q969Y5           | 3                    | 13             | 6.5                   | 635    | 68642 | 8.3  | Solute carrier family 5 (Sodium-dependent vitamin transporter), member 6                                                       |
| 2315 | Q86U28           | 3                    | 6              | 18.2                  | 154    | 16476 | 5.2  | Iron-sulfur cluster assembly 2 homolog, mitochondrial precursor                                                                |
| 2316 | Q7Z5G8           | 3                    | 4              | 18.1                  | 276    | 31625 | 7.1  | P15RS protein                                                                                                                  |
| 2316 | Q96FY9           | 3                    | 4              | 17.3                  | 289    | 32917 | 6.7  | P15RS protein                                                                                                                  |
| 2316 | Q96P16           | 3                    | 4              | 16                    | 312    | 35720 | 7.5  | Cyclin-dependent kinase inhibitor-related protein                                                                              |
| 2317 | Q969J3           | 3                    | 5              | 17.9                  | 196    | 22222 | 6.4  | Loss of heterozygosity 12 chromosomal region 1 protein                                                                         |
| 2318 | P61009           | 3                    | 14             | 17.8                  | 180    | 20313 | 8.6  | Signal peptidase complex subunit 3                                                                                             |
| 2318 | UPI00004572A7    | 3                    | 14             | 17.5                  | 183    | 20779 | 9.3  | Signal peptidase complex subunit 3 (EC 3.4.--) (Microsomal signal peptidase 23 kDa subunit) (SPase 22 kDa subunit) (SPC22/23). |
| 2319 | Q9H2D1           | 3                    | 3              | 17.8                  | 315    | 35407 | 9.5  | Mitochondrial folate transporter/carrier                                                                                       |
| 2320 | Q496C9           | 3                    | 5              | 17.7                  | 209    | 23484 | 8.3  | D-tyrosyl-tRNA deacylase 1 homolog                                                                                             |
| 2320 | Q8TEA8           | 3                    | 5              | 17.7                  | 209    | 23424 | 8.2  | Probable D-tyrosyl-tRNA(Tyr) deacylase 1                                                                                       |
| 2321 | Q9BUH6           | 3                    | 5              | 17.6                  | 204    | 21640 | 5.5  | Uncharacterized protein C9orf142                                                                                               |
| 2322 | P60903           | 3                    | 29             | 17.5                  | 97     | 11203 | 7.4  | Protein S100-A10                                                                                                               |
| 2322 | Q6FGE5           | 3                    | 29             | 17.5                  | 97     | 11187 | 7.4  | S100A10 protein                                                                                                                |
| 2323 | Q9NR18           | 3                    | 4              | 17.6                  | 210    | 24121 | 5.8  | HT014                                                                                                                          |
| 2323 | Q9GZP4           | 3                    | 4              | 17.5                  | 211    | 24178 | 5.8  | Uncharacterized protein C1orf128                                                                                               |
| 2324 | UPI000036655D    | 3                    | 3              | 21.5                  | 233    | 26007 | 5.1  | Probable diphthine synthase (EC 2.1.1.98) (Diphthamide biosynthesis methyltransferase).                                        |
| 2324 | UPI000036655C    | 3                    | 3              | 21.5                  | 233    | 25938 | 5.1  | Probable diphthine synthase (EC 2.1.1.98) (Diphthamide biosynthesis methyltransferase).                                        |
| 2324 | Q9H2P9-2         | 3                    | 3              | 21.4                  | 234    | 26122 | 5    | Isoform 2 of Q9H2P9                                                                                                            |
| 2324 | UPI0000D61F6B    | 3                    | 3              | 17.6                  | 284    | 31518 | 5.3  | Probable diphthine synthase (EC 2.1.1.98) (Diphthamide biosynthesis methyltransferase).                                        |
| 2324 | UPI000059D01C    | 3                    | 3              | 17.6                  | 284    | 31580 | 5.3  | diphthine synthase isoform b                                                                                                   |
| 2324 | Q9H2P9           | 3                    | 3              | 17.5                  | 285    | 31651 | 5.3  | Probable diphthine synthase                                                                                                    |
| 2324 | Q9H2P9-4         | 3                    | 3              | 17.5                  | 285    | 31440 | 5.3  | Isoform 4 of Q9H2P9                                                                                                            |
| 2324 | Q9H2P9-5         | 3                    | 3              | 16.8                  | 297    | 33005 | 5.5  | Isoform 5 of Q9H2P9                                                                                                            |
| 2325 | P61599           | 3                    | 6              | 17.4                  | 178    | 20368 | 5    | N-acetyltransferase 5                                                                                                          |
| 2326 | Q9BU61           | 3                    | 12             | 17.4                  | 184    | 20350 | 8.2  | Uncharacterized protein C3orf60                                                                                                |
| 2327 | Q8IWT0           | 3                    | 6              | 17.3                  | 179    | 20675 | 4.6  | Zinc finger and BTB domain-containing opposite strand protein 8                                                                |
| 2328 | Q9Y3B8           | 3                    | 6              | 17.3                  | 237    | 26833 | 6.9  | Oligoribonuclease, mitochondrial precursor                                                                                     |
| 2328 | UPI0000130E83    | 3                    | 6              | 17.3                  | 237    | 26861 | 6.9  | small fragment nuclease                                                                                                        |
| 2329 | Q9NRX2           | 3                    | 8              | 17.1                  | 175    | 20050 | 10.1 | 39S ribosomal protein L17, mitochondrial precursor                                                                             |
| 2330 | Q9Y676           | 3                    | 3              | 17.1                  | 258    | 29396 | 9.4  | 28S ribosomal protein S18b, mitochondrial precursor                                                                            |
| 2331 | Q8N2G6           | 3                    | 3              | 17                    | 241    | 26955 | 8.7  | Zinc finger CCHC domain-containing protein C10orf56                                                                            |
| 2331 | UPI000006DF92    | 3                    | 3              | 17                    | 241    | 26925 | 8.8  | hypothetical protein LOC219654                                                                                                 |
| 2331 | UPI0000D60F78    | 3                    | 3              | 13.7                  | 299    | 31988 | 9.3  | C10orf56 protein                                                                                                               |
| 2332 | Q9UHD9           | 3                    | 5              | 17                    | 624    | 65696 | 5.2  | Ubiquilin-2                                                                                                                    |
| 2333 | Q561V6           | 3                    | 9              | 23.4                  | 137    | 15667 | 7.6  | NDUFB5 protein                                                                                                                 |
| 2333 | O43674           | 3                    | 9              | 16.9                  | 189    | 21750 | 9.6  | NADH dehydrogenase [ubiquinone] 1 beta subcomplex subunit 5, mitochondrial precursor                                           |
| 2334 | UPI000020400A    | 3                    | 35             | 18.7                  | 123    | 14053 | 11.3 | Histone H3.3.                                                                                                                  |
| 2334 | P68431           | 3                    | 35             | 16.9                  | 136    | 15404 | 11.1 | Histone H3.1                                                                                                                   |
| 2334 | Q71DI3           | 3                    | 35             | 16.9                  | 136    | 15388 | 11.3 | Histone H3.2                                                                                                                   |
| 2334 | Q16695           | 3                    | 35             | 16.9                  | 136    | 15508 | 11.1 | Histone H3.1t                                                                                                                  |

| No.  | Accession Number | Unique Peptide Count | Spectrum Count | Sequence Coverage (%) | Length | MolWt  | pI   | Descriptive Name                                                                                                                      |
|------|------------------|----------------------|----------------|-----------------------|--------|--------|------|---------------------------------------------------------------------------------------------------------------------------------------|
| 2334 | P84243           | 3                    | 35             | 16.9                  | 136    | 15328  | 11.3 | Histone H3.3                                                                                                                          |
| 2334 | UPI00006C1BEF    | 3                    | 35             | 16.2                  | 142    | 16181  | 10.6 | PREDICTED: similar to H3 histone, family 3B                                                                                           |
| 2334 | UPI00006C029D    | 3                    | 35             | 12.8                  | 180    | 20527  | 10.2 | PREDICTED: similar to H3 histone, family 2 isoform 2                                                                                  |
| 2335 | A1L179           | 3                    | 6              | 16.8                  | 863    | 99099  | 6.1  | KIF5C protein                                                                                                                         |
| 2335 | UPI0000DD7A67    | 3                    | 6              | 16.8                  | 863    | 99040  | 6.1  | PREDICTED: similar to Kinesin heavy chain isoform 5C (Kinesin heavy chain neuron-specific 2)                                          |
| 2335 | O60282           | 3                    | 6              | 15.2                  | 957    | 109495 | 6.2  | Kinesin heavy chain isoform 5C                                                                                                        |
| 2336 | P40306           | 3                    | 5              | 16.8                  | 273    | 28936  | 7.8  | Proteasome subunit beta type 10 precursor                                                                                             |
| 2336 | Q6IB22           | 3                    | 5              | 16.8                  | 273    | 28936  | 8.1  | Proteasome subunit beta type                                                                                                          |
| 2337 | Q96HR9           | 3                    | 14             | 16.8                  | 184    | 20733  | 8.6  | Receptor expression-enhancing protein 6                                                                                               |
| 2338 | Q9Y3C8           | 3                    | 7              | 16.8                  | 167    | 19458  | 7.4  | Ufm1-conjugating enzyme 1                                                                                                             |
| 2338 | UPI0000167880    | 3                    | 7              | 16.8                  | 167    | 19467  | 7.5  | Ufm1-conjugating enzyme 1                                                                                                             |
| 2339 | P42773           | 3                    | 4              | 16.7                  | 168    | 18127  | 6.5  | Cyclin-dependent kinase 6 inhibitor                                                                                                   |
| 2340 | UPI000045652F    | 3                    | 6              | 18.6                  | 188    | 20857  | 10.1 | 39S ribosomal protein L21, mitochondrial precursor (L21mt) (MRP-L21).                                                                 |
| 2340 | Q7Z2W9           | 3                    | 6              | 16.7                  | 209    | 23159  | 9.9  | 39S ribosomal protein L21, mitochondrial precursor                                                                                    |
| 2341 | UPI0000D624A0    | 3                    | 4              | 16.7                  | 252    | 29580  | 8    | Bridging integrator 3.                                                                                                                |
| 2341 | Q53HW0           | 3                    | 4              | 16.6                  | 253    | 29702  | 8.1  | Bridging integrator 3 variant                                                                                                         |
| 2341 | Q9NQY0           | 3                    | 4              | 16.6                  | 253    | 29665  | 7.5  | Bridging integrator 3                                                                                                                 |
| 2342 | Q9Y6A4           | 3                    | 5              | 16.6                  | 193    | 22774  | 9.8  | Uncharacterized protein C16orf80                                                                                                      |
| 2343 | Q75608-2         | 3                    | 12             | 17.8                  | 214    | 22875  | 6.5  | Isoform 2 of O75608                                                                                                                   |
| 2343 | O75608           | 3                    | 12             | 16.5                  | 230    | 24670  | 6.8  | Acyl-protein thioesterase 1                                                                                                           |
| 2344 | Q13084           | 3                    | 4              | 16.4                  | 256    | 30157  | 8.3  | 39S ribosomal protein L28, mitochondrial precursor                                                                                    |
| 2344 | Q4TT38           | 3                    | 4              | 16.4                  | 256    | 30046  | 8    | Mitochondrial ribosomal protein L28                                                                                                   |
| 2345 | Q53FX5           | 3                    | 16             | 16.2                  | 197    | 21820  | 8    | Lin-7 homolog C variant                                                                                                               |
| 2345 | Q9NUP9           | 3                    | 16             | 16.2                  | 197    | 21834  | 8.4  | Lin-7 homolog C                                                                                                                       |
| 2346 | Q9UM13           | 3                    | 4              | 16.2                  | 185    | 21252  | 9.1  | Anaphase-promoting complex subunit 10                                                                                                 |
| 2346 | UPI000007167D    | 3                    | 4              | 16.2                  | 185    | 21223  | 9.1  | anaphase promoting complex subunit 10                                                                                                 |
| 2347 | Q9BZS6           | 3                    | 6              | 16                    | 194    | 22615  | 5.3  | SSU72 RNA polymerase II CTD phosphatase homolog                                                                                       |
| 2347 | Q9NP77           | 3                    | 6              | 16                    | 194    | 22574  | 5.3  | CDNA FLJ10947 fis, clone PLACE1000066, weakly similar to SSU72 PROTEIN                                                                |
| 2348 | Q4VX17           | 3                    | 6              | 15.9                  | 347    | 38287  | 7.6  | Secretory carrier membrane protein 3                                                                                                  |
| 2348 | UPI0000456274    | 3                    | 6              | 15.9                  | 347    | 38315  | 7.2  | Secretory carrier-associated membrane protein 3 (Secretory carrier membrane protein 3).                                               |
| 2348 | Q6FHJ5           | 3                    | 6              | 15.9                  | 347    | 38243  | 7.6  | SCAMP3 protein                                                                                                                        |
| 2349 | Q5VXM9           | 3                    | 4              | 15.9                  | 208    | 24158  | 9.5  | Brix domain containing 1                                                                                                              |
| 2349 | Q9H7B2           | 3                    | 4              | 10.8                  | 306    | 35583  | 10   | Brix domain-containing protein 1                                                                                                      |
| 2350 | P07738           | 3                    | 3              | 15.8                  | 259    | 30005  | 6.5  | Bisphosphoglycerate mutase                                                                                                            |
| 2351 | UPI0000456EE0    | 3                    | 6              | 16.4                  | 220    | 23901  | 5.4  | Ribulose-phosphate 3-epimerase (EC 5.1.3.1) (Ribulose-5-phosphate-3- epimerase).                                                      |
| 2351 | Q96AT9-2         | 3                    | 6              | 16.4                  | 220    | 23924  | 5.6  | Isoform 2 of Q96AT9                                                                                                                   |
| 2351 | Q96AT9           | 3                    | 6              | 15.8                  | 228    | 24928  | 5.6  | Ribulose-phosphate 3-epimerase                                                                                                        |
| 2352 | Q9H6K1           | 3                    | 3              | 15.8                  | 298    | 32872  | 4.6  | Uncharacterized protein C6orf106                                                                                                      |
| 2353 | Q96IU4           | 3                    | 9              | 15.7                  | 210    | 22346  | 6.4  | Abhydrolase domain-containing protein 14B                                                                                             |
| 2354 | O75935-4         | 3                    | 7              | 27.9                  | 104    | 11882  | 9.8  | Isoform 4 of O75935                                                                                                                   |
| 2354 | UPI0000D61856    | 3                    | 7              | 27.4                  | 106    | 12123  | 10   | Dynactin subunit 3 (Dynactin complex subunit 22 kDa subunit) (p22).                                                                   |
| 2354 | O75935-3         | 3                    | 7              | 18.4                  | 158    | 18001  | 6    | Isoform 3 of O75935                                                                                                                   |
| 2354 | Q5T116           | 3                    | 7              | 18                    | 161    | 18240  | 8.3  | Dynactin 3                                                                                                                            |
| 2354 | O75935-2         | 3                    | 7              | 16.5                  | 176    | 19468  | 7    | Isoform 2 of O75935                                                                                                                   |
| 2354 | O75935           | 3                    | 7              | 15.6                  | 186    | 21119  | 5.5  | Dynactin subunit 3                                                                                                                    |
| 2355 | P49247           | 3                    | 3              | 15.6                  | 237    | 26091  | 7.5  | Ribose-5-phosphate isomerase                                                                                                          |
| 2356 | Q00534           | 3                    | 4              | 15.6                  | 326    | 36938  | 6.5  | Cell division protein kinase 6                                                                                                        |
| 2357 | Q92599-2         | 3                    | 5              | 17.5                  | 429    | 49814  | 6.1  | Isoform 2 of Q92599                                                                                                                   |
| 2357 | UPI000066DA0A    | 3                    | 5              | 17.4                  | 430    | 49916  | 6.2  | Septin-8.                                                                                                                             |
| 2357 | UPI000066DA0B    | 3                    | 5              | 17                    | 440    | 50928  | 6.2  | Septin-8.                                                                                                                             |
| 2357 | UPI000020C588    | 3                    | 5              | 17                    | 442    | 51178  | 6.2  | Septin-8.                                                                                                                             |
| 2357 | UPI000066DA0C    | 3                    | 5              | 16.3                  | 460    | 53163  | 6.5  | Septin-8.                                                                                                                             |
| 2357 | Q92599           | 3                    | 5              | 15.5                  | 483    | 55756  | 6.3  | Septin-8                                                                                                                              |
| 2357 | UPI0000457340    | 3                    | 5              | 15.4                  | 487    | 55908  | 6.4  | Septin-8.                                                                                                                             |
| 2358 | O14561           | 3                    | 3              | 15.4                  | 156    | 17417  | 4.9  | Acyl carrier protein, mitochondrial precursor                                                                                         |
| 2359 | P07478           | 3                    | 25             | 15.4                  | 247    | 26488  | 4.9  | Trypsin-2 precursor                                                                                                                   |
| 2359 | Q3SY20           | 3                    | 25             | 15.4                  | 247    | 26472  | 4.9  | Protease, serine, 2                                                                                                                   |
| 2359 | Q3SY19           | 3                    | 25             | 15.4                  | 247    | 26556  | 4.8  | PRSS1 protein                                                                                                                         |
| 2359 | UPI0000D61CF1    | 3                    | 25             | 14.6                  | 261    | 28220  | 5.4  | Trypsin-2 precursor (EC 3.4.21.4) (Trypsin II) (Anionic trypsinogen) (Serine protease 2).                                             |
| 2359 | Q7Z5F3           | 3                    | 25             | 14.6                  | 261    | 28137  | 5.4  | Protease serine 2 isoform B                                                                                                           |
| 2360 | Q6LBS1           | 3                    | 10             | 17                    | 218    | 21993  | 11.4 | SmB /B' autoimmune antigene                                                                                                           |
| 2360 | Q66K91           | 3                    | 10             | 16                    | 231    | 23656  | 10.9 | Small nuclear ribonucleoprotein polypeptides B and B1                                                                                 |
| 2360 | Q5XPV6           | 3                    | 10             | 16                    | 231    | 23657  | 10.7 | Small nuclear ribonucleoprotein polypeptide B                                                                                         |
| 2360 | Q6PKB4           | 3                    | 10             | 15.8                  | 234    | 24088  | 10.8 | SNRNP protein                                                                                                                         |
| 2360 | UPI0000D612F2    | 3                    | 10             | 15.7                  | 236    | 26362  | 9.3  | Small nuclear ribonucleoprotein-associated protein N (snRNP-N) (Sm protein N) (Sm-N) (SmN) (Sm-D) (Tissue-specific-splicing protein). |
| 2360 | P14678           | 3                    | 10             | 15.4                  | 240    | 24610  | 11.2 | Small nuclear ribonucleoprotein-associated proteins B and B'                                                                          |

| No.  | Accession Number | Unique Peptide Count | Spectrum Count | Sequence Coverage (%) | Length | MolWt | pI   | Descriptive Name                                                                                                       |
|------|------------------|----------------------|----------------|-----------------------|--------|-------|------|------------------------------------------------------------------------------------------------------------------------|
| 2360 | P63162           | 3                    | 10             | 15.4                  | 240    | 24614 | 11.2 | Small nuclear ribonucleoprotein-associated protein N                                                                   |
| 2360 | UPI0000D6101C    | 3                    | 10             | 15.3                  | 242    | 27236 | 9.4  | Small nuclear ribonucleoprotein-associated proteins B and B' (snRNP-B) (Sm protein B/B') (Sm-B/Sm-B') (SmB/SmB').      |
| 2360 | Q9UIS4           | 3                    | 10             | 15.2                  | 243    | 27267 | 9.4  | Small nuclear ribonucleoprotein B'                                                                                     |
| 2360 | Q15182           | 3                    | 10             | 13                    | 285    | 29671 | 10.1 | SNRPB protein                                                                                                          |
| 2360 | UPI0000D6101B    | 3                    | 10             | 12.9                  | 287    | 29862 | 10.2 | Small nuclear ribonucleoprotein-associated proteins B and B' (snRNP-B) (Sm protein B/B') (Sm-B/Sm-B') (SmB/SmB').      |
| 2360 | P14678-3         | 3                    | 10             | 12.8                  | 289    | 30032 | 10.2 | Isoform SM                                                                                                             |
| 2361 | P43487           | 3                    | 16             | 15.4                  | 201    | 23310 | 5.3  | Ran-specific GTPase-activating protein                                                                                 |
| 2361 | UPI00006C1BBA    | 3                    | 16             | 10.2                  | 305    | 35024 | 8.6  | PREDICTED: similar to Ran-specific GTPase-activating protein (Ran-binding protein 1) (RanBP1)                          |
| 2362 | Q5T653           | 3                    | 7              | 15.4                  | 305    | 33301 | 11.3 | 39S ribosomal protein L2, mitochondrial precursor                                                                      |
| 2363 | Q6NW29           | 3                    | 4              | 15.4                  | 188    | 21251 | 5.3  | RWD domain-containing protein 4A                                                                                       |
| 2364 | Q8TF59           | 3                    | 5              | 15.3                  | 445    | 49260 | 4.9  | KIAA1942 protein                                                                                                       |
| 2364 | Q8NCK5           | 3                    | 5              | 15.2                  | 446    | 49346 | 4.9  | CDNA FLJ90195 fis, clone MAMMA1001310                                                                                  |
| 2364 | Q9BQ67           | 3                    | 5              | 15.2                  | 446    | 49419 | 4.9  | Glutamate-rich WD repeat-containing protein 1                                                                          |
| 2365 | Q86WV7           | 3                    | 5              | 15                    | 227    | 25564 | 4.9  | Hypothetical protein                                                                                                   |
| 2365 | UPI0000456ABD    | 3                    | 5              | 15                    | 227    | 25757 | 5    | Coiled-coil domain-containing protein 43.                                                                              |
| 2366 | P62341           | 3                    | 4              | 14.9                  | 195    | 22277 | 8.5  | Selenoprotein T precursor                                                                                              |
| 2366 | UPI000034ECC3    | 3                    | 4              | 14.9                  | 195    | 22174 | 8.6  | selenoprotein T                                                                                                        |
| 2367 | Q9NR77           | 3                    | 7              | 14.9                  | 195    | 22253 | 10.6 | Peroxisomal membrane protein 2                                                                                         |
| 2368 | Q9NVT9           | 3                    | 7              | 14.9                  | 282    | 31281 | 5.8  | Armadillo repeat-containing protein 1                                                                                  |
| 2369 | O95983-2         | 3                    | 6              | 16.6                  | 259    | 29014 | 5.2  | Isoform 2 of O95983                                                                                                    |
| 2369 | O95983           | 3                    | 6              | 14.8                  | 291    | 32844 | 5.3  | Methyl-CpG-binding domain protein 3                                                                                    |
| 2370 | Q52LJ0           | 3                    | 4              | 14.8                  | 330    | 37191 | 6.3  | Protein FAM98B                                                                                                         |
| 2370 | UPI0000DA182F    | 3                    | 4              | 11.3                  | 433    | 45547 | 8.7  | family with sequence similarity 98, member B isoform 1                                                                 |
| 2371 | Q9H1E3           | 3                    | 7              | 14.8                  | 243    | 27296 | 5.1  | Nuclear ubiquitous casein and cyclin-dependent kinases substrate                                                       |
| 2372 | Q9NPD8           | 3                    | 3              | 14.7                  | 197    | 22521 | 8    | Ubiquitin-conjugating enzyme E2 T                                                                                      |
| 2373 | Q5T1C6           | 3                    | 4              | 14.6                  | 240    | 27130 | 8.3  | Thioesterase superfamily member 4                                                                                      |
| 2373 | Q96KR2           | 3                    | 4              | 14.6                  | 240    | 27173 | 8.4  | C-terminal modulator protein                                                                                           |
| 2374 | Q9H944           | 3                    | 5              | 14.6                  | 212    | 23222 | 6.9  | TRF-proximal protein homolog                                                                                           |
| 2375 | UPI0000074015    | 3                    | 4              | 14.8                  | 359    | 39303 | 5.2  | hsp70-interacting protein                                                                                              |
| 2375 | Q9NZL4           | 3                    | 4              | 14.6                  | 362    | 39474 | 5.2  | Hsp70-binding protein 1                                                                                                |
| 2376 | O75391           | 3                    | 3              | 14.5                  | 227    | 26034 | 7.9  | Sperm-associated antigen 7                                                                                             |
| 2376 | UPI000013C65B    | 3                    | 3              | 11.3                  | 292    | 32693 | 8.7  | Sperm-associated antigen 7.                                                                                            |
| 2377 | O94903           | 3                    | 3              | 14.5                  | 275    | 30344 | 7.5  | Proline synthetase co-transcribed bacterial homolog protein                                                            |
| 2378 | P51159-2         | 3                    | 6              | 15                    | 213    | 24041 | 5.7  | Isoform Short of P51159                                                                                                |
| 2378 | P51159           | 3                    | 6              | 14.5                  | 221    | 24868 | 5.2  | Ras-related protein Rab-27A                                                                                            |
| 2378 | Q6IAS8           | 3                    | 6              | 14.5                  | 221    | 24898 | 5.2  | RAB27A protein                                                                                                         |
| 2379 | UPI0000456B12    | 3                    | 26             | 16.2                  | 197    | 22761 | 11.9 | Splicing factor, arginine/serine-rich 2 (Splicing factor SC35) (SC-35) (Splicing component, 35 kDa) (Protein PR264).   |
| 2379 | Q01130           | 3                    | 26             | 14.5                  | 221    | 25476 | 11.9 | Splicing factor, arginine/serine-rich 2                                                                                |
| 2379 | Q53FNO           | 3                    | 26             | 14.5                  | 221    | 25502 | 11.9 | Splicing factor, arginine/serine-rich 2 variant                                                                        |
| 2380 | Q08623           | 3                    | 5              | 14.5                  | 214    | 23730 | 5.3  | Haloacid dehalogenase-like hydrolase domain-containing protein 1A                                                      |
| 2381 | Q15024           | 3                    | 3              | 14.4                  | 291    | 31835 | 5.2  | Exosome complex exonuclease RRP42                                                                                      |
| 2381 | UPI000020A5E9    | 3                    | 3              | 14.4                  | 291    | 31821 | 5.2  | Exosome complex exonuclease RRP42 (EC 3.1.13.-) (Ribosomal RNA- processing protein 42) (Exosome component 7) (p8).     |
| 2382 | Q15427           | 3                    | 5              | 14.4                  | 424    | 44386 | 8.6  | Splicing factor 3B subunit 4                                                                                           |
| 2382 | Q53FG6           | 3                    | 5              | 14.4                  | 424    | 44387 | 8.2  | Splicing factor 3b, subunit 4 variant                                                                                  |
| 2383 | Q16539-3         | 3                    | 3              | 17.5                  | 297    | 34092 | 8.2  | Isoform Mxi2 of Q16539                                                                                                 |
| 2383 | Q16539-4         | 3                    | 3              | 16.9                  | 307    | 35453 | 8.7  | Isoform Exip of Q16539                                                                                                 |
| 2383 | Q16539           | 3                    | 3              | 14.4                  | 360    | 41293 | 5.8  | Mitogen-activated protein kinase 14                                                                                    |
| 2383 | Q95NE7           | 3                    | 3              | 14.4                  | 360    | 41493 | 5.9  | Mitogen-activated protein kinase 14                                                                                    |
| 2384 | Q9H446           | 3                    | 3              | 14.4                  | 243    | 27939 | 4.2  | RWD domain-containing protein 1                                                                                        |
| 2385 | P51580           | 3                    | 3              | 14.3                  | 245    | 28180 | 6.2  | Thiopurine S-methyltransferase                                                                                         |
| 2385 | Q9BS45           | 3                    | 3              | 14.3                  | 245    | 28233 | 6.4  | Thiopurine S-methyltransferase                                                                                         |
| 2386 | Q9H3H0           | 3                    | 7              | 14.2                  | 247    | 28275 | 9.4  | Vacuolar ATP synthase subunit D homolog                                                                                |
| 2386 | Q9Y5K8           | 3                    | 7              | 14.2                  | 247    | 28263 | 9.4  | Vacuolar ATP synthase subunit D                                                                                        |
| 2387 | O60888           | 3                    | 6              | 15.6                  | 179    | 19116 | 5.5  | Protein CutA precursor                                                                                                 |
| 2387 | A2AB26           | 3                    | 6              | 14.1                  | 198    | 20925 | 5.5  | CutA divalent cation tolerance homolog                                                                                 |
| 2388 | O95330           | 3                    | 7              | 14.1                  | 198    | 22396 | 6.4  | Hypothetical protein                                                                                                   |
| 2388 | UPI0000D61079    | 3                    | 7              | 11.3                  | 248    | 28113 | 5.5  | Endoplasmic reticulum-Golgi intermediate compartment protein 3 (Serologically defined breast cancer antigen NY-BR-84). |
| 2388 | Q9Y282           | 3                    | 7              | 7.3                   | 383    | 43222 | 6.1  | Endoplasmic reticulum-Golgi intermediate compartment protein 3                                                         |
| 2388 | UPI0000456F87    | 3                    | 7              | 7.2                   | 390    | 44008 | 5.9  | Endoplasmic reticulum-Golgi intermediate compartment protein 3 (Serologically defined breast cancer antigen NY-BR-84). |
| 2388 | Q5JWS3           | 3                    | 7              | 7.2                   | 388    | 43772 | 6    | ERGIC and golgi 3                                                                                                      |

| No.  | Accession Number | Unique Peptide Count | Spectrum Count | Sequence Coverage (%) | Length | MolWt | pI   | Descriptive Name                                                                                                                                                                   |
|------|------------------|----------------------|----------------|-----------------------|--------|-------|------|------------------------------------------------------------------------------------------------------------------------------------------------------------------------------------|
| 2388 | Q5JWS0           | 3                    | 7              | 7.1                   | 396    | 44568 | 6.5  | ERGIC and golgi 3                                                                                                                                                                  |
| 2389 | Q5T8T7           | 3                    | 6              | 20.9                  | 134    | 15855 | 4.9  | Surfeit 5                                                                                                                                                                          |
| 2389 | Q5T8T8           | 3                    | 6              | 20.4                  | 137    | 16032 | 4.8  | Surfeit 5                                                                                                                                                                          |
| 2389 | Q15528-2         | 3                    | 6              | 20                    | 140    | 16480 | 5    | Isoform Surf5A of Q15528                                                                                                                                                           |
| 2389 | Q15528           | 3                    | 6              | 14                    | 200    | 22221 | 4.7  | Surfeit locus protein 5                                                                                                                                                            |
| 2390 | Q7Z4W1           | 3                    | 3              | 13.9                  | 244    | 25913 | 8.1  | L-xylulose reductase                                                                                                                                                               |
| 2391 | Q13595           | 3                    | 5              | 13.8                  | 282    | 32689 | 11.3 | Transformer-2 protein homolog                                                                                                                                                      |
| 2392 | UPI00003675D1    | 3                    | 4              | 13.8                  | 240    | 25498 | 8.6  | Transmembrane protein 65.                                                                                                                                                          |
| 2393 | Q0VAQ8           | 3                    | 5              | 13.7                  | 249    | 26525 | 12.2 | Chromosome 1 open reading frame 77                                                                                                                                                 |
| 2393 | Q9Y3Y2           | 3                    | 5              | 13.7                  | 248    | 26397 | 12.2 | Uncharacterized protein C1orf77                                                                                                                                                    |
| 2394 | P49841           | 3                    | 3              | 13.6                  | 420    | 46744 | 8.8  | Glycogen synthase kinase-3 beta                                                                                                                                                    |
| 2394 | P49841-2         | 3                    | 3              | 13.2                  | 433    | 48034 | 8.8  | Isoform 2 of P49841                                                                                                                                                                |
| 2395 | P25325           | 3                    | 4              | 13.5                  | 297    | 33178 | 6.6  | 3-mercaptopyruvate sulfurtransferase                                                                                                                                               |
| 2396 | P27144           | 3                    | 6              | 13.5                  | 223    | 25268 | 8.4  | Adenylate kinase isoenzyme 4, mitochondrial                                                                                                                                        |
| 2396 | UPI00006C1315    | 3                    | 6              | 13.5                  | 223    | 25240 | 8.4  | PREDICTED: similar to Adenylate kinase isoenzyme 4, mitochondrial (Adenylate kinase 3-like 1) (ATP-AMP transphosphorylase)                                                         |
| 2396 | UPI0000141B7B    | 3                    | 6              | 13.5                  | 223    | 25208 | 8.4  | PREDICTED: similar to Adenylate kinase isoenzyme 4, mitochondrial (Adenylate kinase 3-like 1) (ATP-AMP transphosphorylase)                                                         |
| 2396 | Q8IUU9           | 3                    | 6              | 13.5                  | 223    | 25252 | 8.6  | Adenylate kinase 3-like 1                                                                                                                                                          |
| 2396 | Q6NXQ5           | 3                    | 6              | 13.5                  | 223    | 25296 | 8.7  | Adenylate kinase 3-like 1                                                                                                                                                          |
| 2397 | Q96PJ7           | 3                    | 4              | 16.6                  | 211    | 23758 | 8.7  | Ras-related GTP-binding protein RAB39                                                                                                                                              |
| 2397 | UPI0000D622F3    | 3                    | 4              | 16.4                  | 213    | 23958 | 8.5  | Ras-related protein Rab-34 (Rab-39) (Ras-related protein Rah).                                                                                                                     |
| 2397 | Q6NXT3           | 3                    | 4              | 13.5                  | 259    | 29071 | 7.9  | RAB34 protein                                                                                                                                                                      |
| 2397 | UPI000015D94E    | 3                    | 4              | 13.5                  | 259    | 29058 | 7.9  | RAB39                                                                                                                                                                              |
| 2397 | Q9BZG1           | 3                    | 4              | 13.5                  | 259    | 29044 | 7.9  | Ras-related protein Rab-34                                                                                                                                                         |
| 2398 | Q9BTE7           | 3                    | 3              | 13.5                  | 237    | 27508 | 5.6  | DCN1-like protein 5                                                                                                                                                                |
| 2399 | Q9H3H3           | 3                    | 6              | 13.5                  | 251    | 27383 | 5.6  | Uncharacterized protein C11orf68                                                                                                                                                   |
| 2399 | UPI0000228EAB    | 3                    | 6              | 13.5                  | 251    | 27355 | 5.5  | Uncharacterized protein C11orf68 (Basophilic leukemia expressed protein Bles03) (Protein p5326).                                                                                   |
| 2400 | Q8N9N7           | 3                    | 6              | 13.4                  | 239    | 26754 | 8.4  | Leucine-rich repeat-containing protein 57                                                                                                                                          |
| 2400 | UPI000006FF78    | 3                    | 6              | 13.4                  | 239    | 26740 | 8.2  | leucine rich repeat containing 57                                                                                                                                                  |
| 2401 | Q96MF7           | 3                    | 6              | 13.4                  | 247    | 27932 | 7.7  | E3 SUMO-protein ligase NSE2                                                                                                                                                        |
| 2402 | Q8TB70           | 3                    | 3              | 16                    | 188    | 22199 | 5.8  | TXNDC9 protein                                                                                                                                                                     |
| 2402 | O14530           | 3                    | 3              | 13.3                  | 226    | 26534 | 5.9  | Thioredoxin domain-containing protein 9                                                                                                                                            |
| 2402 | Q53HG4           | 3                    | 3              | 13.3                  | 226    | 26535 | 5.7  | ATP binding protein associated with cell differentiation variant                                                                                                                   |
| 2403 | Q567U8           | 3                    | 6              | 13.3                  | 248    | 27317 | 5.5  | COP57A protein                                                                                                                                                                     |
| 2403 | Q9UBW8           | 3                    | 6              | 12                    | 275    | 30277 | 8.2  | COP9 signalosome complex subunit 7a                                                                                                                                                |
| 2404 | Q8WUN9           | 3                    | 3              | 13.4                  | 246    | 28051 | 4.7  | MGC40499 protein                                                                                                                                                                   |
| 2404 | Q8N129           | 3                    | 3              | 13.3                  | 248    | 28310 | 4.6  | PRotein Associated with Tlr4                                                                                                                                                       |
| 2404 | UPI0000DD7E73    | 3                    | 3              | 9.8                   | 336    | 37824 | 6.3  | PREDICTED: similar to PRotein Associated with Tlr4                                                                                                                                 |
| 2405 | UPI0000F0A4D4    | 3                    | 5              | 16.8                  | 196    | 21694 | 6.8  | Cob(II)yrinic acid a,c-diamide adenosyltransfe                                                                                                                                     |
| 2405 | Q96EY8           | 3                    | 5              | 13.2                  | 250    | 27388 | 8.6  | Cob(II)yrinic acid a,c-diamide adenosyltransferase, mitochondrial precursor (EC 2.5.1.17) (Cob(II)alamin adenosyltransferase)                                                      |
| 2406 | O95478           | 3                    | 3              | 13.1                  | 260    | 30065 | 10.3 | TGF-beta-inducible nuclear protein 1                                                                                                                                               |
| 2407 | P17900           | 3                    | 7              | 13                    | 193    | 20822 | 5.3  | Ganglioside GM2 activator precursor (GM2-AP) (Cerebroside sulfate activator protein) (Shingolipid activator protein 3) (SAP-3) [Contains: Ganglioside GM2 activator isoform short] |
| 2407 | UPI00001AEC37    | 3                    | 7              | 13                    | 193    | 20838 | 5.3  | GM2 ganglioside activator precursor                                                                                                                                                |
| 2408 | Q15102           | 3                    | 3              | 13                    | 231    | 25734 | 6.8  | Platelet-activating factor acetylhydrolase IB subunit gamma                                                                                                                        |
| 2409 | Q6DRA6           | 3                    | 18             | 15.2                  | 164    | 18018 | 10.6 | Histone H2B type 2-D                                                                                                                                                               |
| 2409 | Q6DN03           | 3                    | 18             | 13                    | 193    | 21472 | 10.7 | Histone H2B type 2-C                                                                                                                                                               |
| 2410 | Q9HC03           | 3                    | 6              | 13                    | 324    | 36964 | 9.3  | Dolichyl-phosphate beta-glucosyltransferase                                                                                                                                        |
| 2410 | Q9Y673           | 3                    | 6              | 13                    | 324    | 36946 | 9.3  | Dolichyl-phosphate beta-glucosyltransferase                                                                                                                                        |
| 2411 | Q9HA64           | 3                    | 4              | 12.9                  | 309    | 34412 | 7.3  | Ketosamine-3-kinase                                                                                                                                                                |
| 2412 | Q9NZD2           | 3                    | 5              | 12.9                  | 209    | 23850 | 7.4  | Glycolipid transfer protein                                                                                                                                                        |
| 2413 | UPI0000D61C3C    | 3                    | 3              | 13.3                  | 278    | 30640 | 8.5  | Insulin-like growth factor-binding protein 3 precursor (IGFBP-3) (IBP-3) (IGF-binding protein 3).                                                                                  |
| 2413 | P17936           | 3                    | 3              | 12.7                  | 291    | 31674 | 8.7  | Insulin-like growth factor-binding protein 3 precursor                                                                                                                             |
| 2413 | UPI00004F8E1F    | 3                    | 3              | 12.5                  | 297    | 32223 | 8.6  | insulin-like growth factor binding protein 3 isoform a precursor                                                                                                                   |
| 2414 | Q5HYI8           | 3                    | 12             | 12.7                  | 236    | 26423 | 7.1  | Rab-like protein 3                                                                                                                                                                 |
| 2414 | Q8WUD3           | 3                    | 12             | 12.7                  | 236    | 26308 | 6.8  | RAB, member of RAS oncogene family-like 3                                                                                                                                          |
| 2415 | Q8NDC9           | 3                    | 3              | 12.7                  | 322    | 34529 | 5.7  | Hypothetical protein DKFZp547E2313                                                                                                                                                 |
| 2415 | Q9BV20           | 3                    | 3              | 11.1                  | 369    | 39150 | 6.3  | Hypothetical protein MGC3207                                                                                                                                                       |
| 2416 | Q9NW68           | 3                    | 4              | 12.6                  | 430    | 47163 | 4.5  | BSD domain-containing protein 1                                                                                                                                                    |
| 2416 | Q9NW68-2         | 3                    | 4              | 12.6                  | 428    | 46860 | 4.8  | Isoform 2 of Q9NW68                                                                                                                                                                |
| 2416 | Q9NW68-3         | 3                    | 4              | 11.4                  | 474    | 51167 | 4.6  | Isoform 3 of Q9NW68                                                                                                                                                                |
| 2417 | O95758           | 3                    | 4              | 12.5                  | 521    | 56502 | 9.2  | Regulator of differentiation 1                                                                                                                                                     |
| 2417 | Q5T8V9           | 3                    | 4              | 12.4                  | 524    | 56821 | 9.2  | ROD1 regulator of differentiation 1                                                                                                                                                |
| 2417 | Q5T4E6           | 3                    | 4              | 11.8                  | 552    | 59690 | 9    | ROD1 regulator of differentiation 1                                                                                                                                                |

| No.  | Accession Number | Unique Peptide Count | Spectrum Count | Sequence Coverage (%) | Length | MolWt | pI   | Descriptive Name                                                                                                                                                                               |
|------|------------------|----------------------|----------------|-----------------------|--------|-------|------|------------------------------------------------------------------------------------------------------------------------------------------------------------------------------------------------|
| 2417 | O95758-2         | 3                    | 4              | 10.6                  | 614    | 66234 | 9.5  | Isoform 2 of O95758                                                                                                                                                                            |
| 2418 | P49366           | 3                    | 4              | 12.5                  | 369    | 40971 | 5.4  | Deoxyhypusine synthase                                                                                                                                                                         |
| 2419 | Q15555           | 3                    | 3              | 12.5                  | 327    | 37031 | 5.6  | Microtubule-associated protein RP/EB family member 2                                                                                                                                           |
| 2420 | Q15773           | 3                    | 7              | 12.5                  | 248    | 28147 | 6.9  | Myeloid leukemia factor 2                                                                                                                                                                      |
| 2421 | Q561W0           | 3                    | 8              | 14.3                  | 258    | 29642 | 8.7  | TXNDC14 protein                                                                                                                                                                                |
| 2421 | Q53G73           | 3                    | 8              | 12.5                  | 296    | 34025 | 8.7  | Thioredoxin-related transmembrane protein 2 variant                                                                                                                                            |
| 2421 | Q9Y320           | 3                    | 8              | 12.5                  | 296    | 34038 | 8.7  | CGI-31 protein                                                                                                                                                                                 |
| 2421 | Q5J7Q7           | 3                    | 8              | 12.5                  | 296    | 34012 | 8.7  | Proliferation-inducing gene 26 protein                                                                                                                                                         |
| 2421 | UPI000024706C    | 3                    | 8              | 10                    | 371    | 42472 | 8.6  | Catenin delta-1 (p120 catenin) (p120(ctn)) (Cadherin-associated Src substrate) (CAS) (p120(cas)).                                                                                              |
| 2421 | Q9H3L1           | 3                    | 8              | 9.9                   | 372    | 42478 | 8.7  | My009 protein                                                                                                                                                                                  |
| 2421 | Q8NBP9           | 3                    | 8              | 9.9                   | 372    | 42543 | 8.6  | Thioredoxin domain-containing protein 14                                                                                                                                                       |
| 2422 | Q53HT2           | 3                    | 15             | 12.5                  | 279    | 32633 | 9.6  | Elongation of very long chain fatty acids (FEN1/Elo2, SUR4/Elo3, yeast)-like 1 variant                                                                                                         |
| 2422 | Q9BW60           | 3                    | 15             | 12.5                  | 279    | 32663 | 9.6  | Elongation of very long chain fatty acids protein 1                                                                                                                                            |
| 2422 | Q8WXU3           | 3                    | 15             | 12.5                  | 279    | 32637 | 9.6  | SSC1/ELOVL1                                                                                                                                                                                    |
| 2423 | Q96NM0           | 3                    | 3              | 12.5                  | 279    | 31716 | 6.7  | Uncharacterized protein C5orf33                                                                                                                                                                |
| 2424 | Q9H0L4           | 3                    | 4              | 12.5                  | 616    | 64436 | 7.3  | Cleavage stimulation factor 64 kDa subunit, tau variant                                                                                                                                        |
| 2425 | Q9H3F6-2         | 3                    | 3              | 13.4                  | 290    | 32779 | 6.6  | Isoform 2 of Q9H3F6                                                                                                                                                                            |
| 2425 | Q9H3F6           | 3                    | 3              | 12.5                  | 313    | 35432 | 6.3  | BTB/POZ domain-containing protein KCTD10                                                                                                                                                       |
| 2426 | O00422           | 3                    | 7              | 12.4                  | 153    | 17561 | 9.4  | Histone deacetylase complex subunit SAP18                                                                                                                                                      |
| 2427 | P49770           | 3                    | 4              | 12.3                  | 351    | 38990 | 6.2  | Translation initiation factor eIF-2B subunit beta                                                                                                                                              |
| 2427 | Q9BPX4           | 3                    | 4              | 12.3                  | 351    | 39004 | 6.2  | Eukaryotic translation initiation factor 2B, subunit 2 beta, 39kDa                                                                                                                             |
| 2428 | Q6J203           | 3                    | 6              | 12.1                  | 199    | 22558 | 10.1 | HCV F-transactivated protein 1                                                                                                                                                                 |
| 2429 | Q8NBZ7           | 3                    | 8              | 12.1                  | 420    | 47577 | 8.9  | UDP-glucuronic acid decarboxylase 1                                                                                                                                                            |
| 2429 | UPI0000D6120F    | 3                    | 8              | 12                    | 425    | 48179 | 8.9  | UDP-glucuronic acid decarboxylase 1 (EC 4.1.1.35) (UDP-glucuronate decarboxylase 1) (UGD) (UXS-1).                                                                                             |
| 2429 | Q8NBZ7-2         | 3                    | 8              | 12                    | 425    | 48152 | 8.9  | Isoform 2 of Q8NBZ7                                                                                                                                                                            |
| 2430 | Q9NXR1-2         | 3                    | 5              | 12.5                  | 335    | 37721 | 5.2  | Isoform 2 of Q9NXR1                                                                                                                                                                            |
| 2430 | Q9NXR1           | 3                    | 5              | 12.1                  | 346    | 38808 | 5.3  | Nuclear distribution protein nudE homolog 1                                                                                                                                                    |
| 2431 | Q13547           | 3                    | 5              | 12                    | 482    | 55103 | 5.5  | Histone deacetylase 1                                                                                                                                                                          |
| 2432 | Q9NZJ9           | 3                    | 4              | 15.6                  | 180    | 20306 | 6.4  | Diphosphoinositol polyphosphate phosphohydrolase 2                                                                                                                                             |
| 2432 | Q4AEJ6           | 3                    | 4              | 12                    | 234    | 25951 | 6.8  | KIAA0487 protein                                                                                                                                                                               |
| 2433 | Q96CX2           | 3                    | 3              | 12                    | 325    | 35701 | 5.6  | BTB/POZ domain-containing protein KCTD12                                                                                                                                                       |
| 2434 | P05026-2         | 3                    | 15             | 12                    | 301    | 34893 | 8.6  | Isoform 2 of P05026                                                                                                                                                                            |
| 2434 | P05026           | 3                    | 15             | 11.9                  | 303    | 35061 | 8.5  | Sodium/potassium-transporting ATPase subunit beta-1                                                                                                                                            |
| 2434 | Q6LEU2           | 3                    | 15             | 11.9                  | 303    | 35049 | 8.5  | ATP1B1 protein                                                                                                                                                                                 |
| 2434 | UPI0000D6203C    | 3                    | 15             | 11.8                  | 305    | 35246 | 8.5  | Sodium/potassium-transporting ATPase subunit beta-1 (Sodium/potassium- dependent ATPase beta-1 subunit).                                                                                       |
| 2435 | Q9H2W6           | 3                    | 4              | 11.8                  | 279    | 31705 | 7    | 39S ribosomal protein L46, mitochondrial precursor                                                                                                                                             |
| 2436 | Q9ULW3           | 3                    | 3              | 11.8                  | 272    | 31079 | 9.9  | Activator of basal transcription 1                                                                                                                                                             |
| 2437 | O75190           | 3                    | 8              | 11.7                  | 326    | 36087 | 9.1  | DnaJ homolog subfamily B member 6                                                                                                                                                              |
| 2437 | Q53EN8           | 3                    | 8              | 11.7                  | 326    | 36117 | 9.1  | DnaJ (Hsp40) homolog, subfamily B, member 6 isoform a variant                                                                                                                                  |
| 2438 | UPI0000DD7AE9    | 3                    | 8              | 14.2                  | 268    | 31695 | 8.8  | PREDICTED: similar to LIM and senescent cell antigen-like domains 1                                                                                                                            |
| 2438 | P48059           | 3                    | 8              | 11.7                  | 325    | 37251 | 8    | LIM and senescent cell antigen-like-containing domain protein 1                                                                                                                                |
| 2438 | UPI0000207FB5    | 3                    | 8              | 9.8                   | 387    | 44390 | 8    | LIM and senescent cell antigen-like-containing domain protein 1 (Particularly interesting new Cys-His protein 1) (PINCH-1) (Renal carcinoma antigen NY-REN-48).                                |
| 2439 | Q6PQ81           | 3                    | 6              | 11.7                  | 350    | 38340 | 4.7  | Putative tumor suppressor Dkk-3/REIC                                                                                                                                                           |
| 2439 | UPI00001694CA    | 3                    | 6              | 11.7                  | 350    | 38390 | 4.7  | dickkopf homolog 3 precursor                                                                                                                                                                   |
| 2439 | Q9UBP4           | 3                    | 6              | 11.7                  | 350    | 38291 | 4.6  | Dickkopf-related protein 3 precursor                                                                                                                                                           |
| 2440 | Q96B24           | 3                    | 8              | 11.7                  | 266    | 30368 | 5.1  | Integral membrane protein 2B                                                                                                                                                                   |
| 2440 | Q9Y287           | 3                    | 8              | 11.7                  | 266    | 30338 | 5.1  | Integral membrane protein 2B (Transmembrane protein BRI) [Contains: ABri/ADan amyloid peptide]                                                                                                 |
| 2440 | Q9NX12           | 3                    | 8              | 11.7                  | 266    | 30312 | 5.2  | CDNA FLJ20496 fis, clone KAT08729                                                                                                                                                              |
| 2441 | Q9H5L2           | 3                    | 5              | 11.7                  | 418    | 46982 | 6.7  | CDNA: FLJ23330 fis, clone HEP12654                                                                                                                                                             |
| 2441 | Q9Y2T2           | 3                    | 5              | 11.7                  | 418    | 46939 | 6.9  | AP-3 complex subunit mu-1                                                                                                                                                                      |
| 2442 | P49753-2         | 3                    | 3              | 16.3                  | 301    | 32997 | 8.1  | Isoform 2 of P49753                                                                                                                                                                            |
| 2442 | A1L172           | 3                    | 3              | 11.6                  | 421    | 46296 | 7.5  | Acyl-CoA thioesterase 1                                                                                                                                                                        |
| 2442 | Q86TX2           | 3                    | 3              | 11.6                  | 421    | 46277 | 7.3  | Acyl-coenzyme A thioesterase 1                                                                                                                                                                 |
| 2442 | UPI0000161F5B    | 3                    | 3              | 10.1                  | 483    | 53266 | 8.6  | peroxisomal long-chain acyl-coA thioesterase                                                                                                                                                   |
| 2442 | UPI000013CA4E    | 3                    | 3              | 10.1                  | 483    | 53219 | 8.5  | Acyl-coenzyme A thioesterase 2 (EC 3.1.2.2) (Acyl-CoA thioesterase 2) (Peroxisomal acyl-coenzyme A thioester hydrolase 2a) (Peroxisomal long-chain acyl-coA thioesterase 2) (ZAP128) (CTE-Ia). |
| 2442 | Q3I5F8           | 3                    | 3              | 10.1                  | 483    | 53227 | 8.8  | Mitochondrial acyl-CoA thioesterase 2                                                                                                                                                          |
| 2442 | P49753           | 3                    | 3              | 10.1                  | 483    | 53257 | 8.7  | Acyl-coenzyme A thioesterase 2                                                                                                                                                                 |
| 2443 | O95218-2         | 3                    | 7              | 12.5                  | 311    | 35304 | 8.8  | Isoform ZIS                                                                                                                                                                                    |
| 2443 | Q59F92           | 3                    | 7              | 12.3                  | 316    | 36032 | 9.8  | Zinc finger protein 265 isoform 1 variant                                                                                                                                                      |

| No.  | Accession Number | Unique Peptide Count | Spectrum Count | Sequence Coverage (%) | Length | MolWt | pI   | Descriptive Name                                                                                                                          |
|------|------------------|----------------------|----------------|-----------------------|--------|-------|------|-------------------------------------------------------------------------------------------------------------------------------------------|
| 2443 | Q5VV33           | 3                    | 7              | 12.2                  | 320    | 36318 | 9.8  | Zinc finger, RAN-binding domain containing 2                                                                                              |
| 2443 | Q5VV34           | 3                    | 7              | 11.8                  | 330    | 37404 | 10   | Zinc finger, RAN-binding domain containing 2                                                                                              |
| 2443 | Q53GS3           | 3                    | 7              | 11.8                  | 330    | 37332 | 10.1 | Zinc finger protein 265 isoform 1 variant                                                                                                 |
| 2443 | Q95218           | 3                    | 7              | 11.6                  | 337    | 38223 | 8.7  | Zinc finger Ran-binding domain-containing protein 2                                                                                       |
| 2443 | UPI000013F68D    | 3                    | 7              | 11.6                  | 336    | 38136 | 8.7  | Zinc finger Ran-binding domain-containing protein 2 (Zinc finger protein 265) (Zinc finger, splicing).                                    |
| 2444 | Q4G0F5           | 3                    | 4              | 11.6                  | 336    | 39155 | 7.3  | Vacuolar protein sorting-associated protein 26B                                                                                           |
| 2445 | Q99496           | 3                    | 4              | 11.6                  | 336    | 37655 | 6.8  | E3 ubiquitin-protein ligase RING2                                                                                                         |
| 2446 | Q15287-2         | 3                    | 7              | 12.4                  | 282    | 31709 | 11.9 | Isoform 2 of Q15287                                                                                                                       |
| 2446 | Q15287           | 3                    | 7              | 11.5                  | 305    | 34208 | 11.8 | RNA-binding protein with serine-rich domain 1                                                                                             |
| 2447 | Q9NT62-2         | 3                    | 5              | 11.6                  | 311    | 35467 | 4.8  | Isoform 2 of Q9NT62                                                                                                                       |
| 2447 | Q9NT62           | 3                    | 5              | 11.5                  | 314    | 35864 | 4.7  | Autophagy-related protein 3                                                                                                               |
| 2448 | Q6NXE6           | 3                    | 3              | 11.4                  | 501    | 54142 | 6.2  | Armadillo repeat-containing protein 6                                                                                                     |
| 2449 | Q6ZMK1           | 3                    | 3              | 11.4                  | 289    | 33274 | 7.7  | Cysteine/histidine-rich protein 1                                                                                                         |
| 2450 | Q95297           | 3                    | 3              | 11.2                  | 269    | 29082 | 8.7  | Myelin protein zero-like protein 1 precursor                                                                                              |
| 2450 | Q5U0H8           | 3                    | 3              | 11.2                  | 269    | 29096 | 8.7  | Myelin protein zero-like 1                                                                                                                |
| 2450 | Q95297-2         | 3                    | 3              | 11.2                  | 268    | 28981 | 8.7  | Isoform 2 of Q95297                                                                                                                       |
| 2451 | Q5T446           | 3                    | 6              | 21.2                  | 193    | 21459 | 5.2  | Uroporphyrinogen decarboxylase                                                                                                            |
| 2451 | UPI0000D61F00    | 3                    | 6              | 20                    | 205    | 22886 | 5.4  | Uroporphyrinogen decarboxylase (EC 4.1.1.37) (URO-D) (UPD).                                                                               |
| 2451 | P06132           | 3                    | 6              | 11.2                  | 367    | 40787 | 6.1  | Uroporphyrinogen decarboxylase                                                                                                            |
| 2451 | Q53ZP6           | 3                    | 6              | 11.2                  | 367    | 40803 | 6.1  | Uroporphyrinogen decarboxylase                                                                                                            |
| 2451 | Q53YB8           | 3                    | 6              | 11.2                  | 367    | 40829 | 6.1  | Uroporphyrinogen decarboxylase                                                                                                            |
| 2452 | A0FIK6           | 3                    | 3              | 11.1                  | 324    | 36673 | 9.6  | HRB2 variant B                                                                                                                            |
| 2452 | Q13601           | 3                    | 3              | 9.4                   | 381    | 43665 | 9.8  | KRR1 small subunit processome component homolog                                                                                           |
| 2453 | UPI00002109D3    | 3                    | 7              | 14.6                  | 288    | 34729 | 5.8  | farnesyltransferase, CAAX box, alpha isoform b                                                                                            |
| 2453 | UPI0000520A1B    | 3                    | 7              | 13.5                  | 312    | 36493 | 5.2  | farnesyltransferase, CAAX box, alpha isoform c                                                                                            |
| 2453 | P49354           | 3                    | 7              | 11.1                  | 379    | 44409 | 5.1  | Protein farnesyltransferase/geranylgeranyltransferase type I alpha subunit                                                                |
| 2454 | Q43813           | 3                    | 5              | 11                    | 399    | 45283 | 7.8  | LanC-like protein 1                                                                                                                       |
| 2454 | Q6FHH6           | 3                    | 5              | 11                    | 399    | 45267 | 7.8  | LANCL1 protein                                                                                                                            |
| 2455 | P49406           | 3                    | 9              | 11                    | 292    | 33535 | 9.5  | 39S ribosomal protein L19, mitochondrial precursor                                                                                        |
| 2456 | P55039           | 3                    | 3              | 11                    | 364    | 40746 | 8.9  | Developmentally-regulated GTP-binding protein 2                                                                                           |
| 2456 | Q53Y50           | 3                    | 3              | 11                    | 364    | 40777 | 8.9  | Developmentally regulated GTP binding protein 2                                                                                           |
| 2457 | Q9NPD3           | 3                    | 12             | 11                    | 245    | 26383 | 6.5  | Exosome complex exonuclease RRP41                                                                                                         |
| 2457 | UPI0000D6251B    | 3                    | 12             | 10.9                  | 247    | 26610 | 6.7  | Exosome complex exonuclease RRP41 (EC 3.1.13.-) (Ribosomal RNA- processing protein 41) (Exosome component 4) (p12A).                      |
| 2458 | Q9Y3B9           | 3                    | 3              | 11                    | 282    | 31484 | 5.5  | RRP15-like protein                                                                                                                        |
| 2459 | Q8TDX7           | 3                    | 5              | 10.9                  | 302    | 34551 | 8.3  | Serine/threonine-protein kinase Nek7                                                                                                      |
| 2460 | P80217           | 3                    | 3              | 10.8                  | 286    | 31514 | 6.1  | Interferon-induced 35 kDa protein                                                                                                         |
| 2460 | UPI0000200E4E    | 3                    | 3              | 10.8                  | 288    | 31777 | 6.1  | Interferon-induced 35 kDa protein (IFP 35).                                                                                               |
| 2460 | P80217-2         | 3                    | 3              | 10.8                  | 288    | 31745 | 6.1  | Isoform 2 of P80217                                                                                                                       |
| 2461 | Q06547-4         | 3                    | 4              | 11.2                  | 348    | 36950 | 4.9  | Isoform 4 of Q06547                                                                                                                       |
| 2461 | Q06547-3         | 3                    | 4              | 10.8                  | 360    | 38111 | 4.9  | Isoform 3 of Q06547                                                                                                                       |
| 2462 | Q8IVM0           | 3                    | 6              | 10.8                  | 306    | 35822 | 6.7  | Coiled-coil domain-containing protein 50                                                                                                  |
| 2462 | Q8IVM0-2         | 3                    | 6              | 6.8                   | 482    | 56340 | 8.2  | Isoform 2 of Q8IVM0                                                                                                                       |
| 2463 | Q96SD6           | 3                    | 4              | 10.7                  | 393    | 44071 | 4.8  | Putative TCPTP-interacting protein                                                                                                        |
| 2463 | Q9NVQ6           | 3                    | 4              | 8.9                   | 470    | 52118 | 5.1  | CDNA FLJ10579 fis, clone NT2RP2003446                                                                                                     |
| 2463 | Q96TC7           | 3                    | 4              | 8.9                   | 470    | 52070 | 5.1  | Protein FAM82C                                                                                                                            |
| 2464 | UPI00004EC068    | 3                    | 3              | 16.2                  | 198    | 22945 | 5.9  | cyclin C isoform b                                                                                                                        |
| 2464 | Q7Z4L3           | 3                    | 3              | 11.3                  | 283    | 33243 | 7.3  | Cyclin C                                                                                                                                  |
| 2464 | P24863           | 3                    | 3              | 10.6                  | 303    | 35559 | 8.2  | Cyclin-C                                                                                                                                  |
| 2464 | UPI000045747B    | 3                    | 3              | 10.6                  | 302    | 35416 | 8.1  | Cyclin-C.                                                                                                                                 |
| 2465 | Q6NUK4           | 3                    | 3              | 10.6                  | 255    | 29264 | 9.6  | Receptor expression-enhancing protein 3                                                                                                   |
| 2466 | Q8N954-2         | 3                    | 5              | 17.9                  | 156    | 18587 | 5    | Isoform 2 of Q8N954                                                                                                                       |
| 2466 | Q8N954           | 3                    | 5              | 10.6                  | 263    | 30685 | 5.3  | Coiled-coil domain-containing protein 75                                                                                                  |
| 2466 | UPI0000160624    | 3                    | 5              | 9.8                   | 285    | 33277 | 5.9  | coiled-coil domain containing 75                                                                                                          |
| 2467 | Q9BR61           | 3                    | 3              | 10.6                  | 282    | 31151 | 5.1  | Acyl-CoA-binding domain-containing protein 6                                                                                              |
| 2468 | UPI00005199BA    | 3                    | 7              | 10.8                  | 342    | 37980 | 5.7  | paraoxonase 2 isoform 2                                                                                                                   |
| 2468 | Q5FBX7           | 3                    | 7              | 10.8                  | 342    | 38022 | 5.7  | Paraoxonase nirs variant 1                                                                                                                |
| 2468 | A4D1H7           | 3                    | 7              | 10.5                  | 354    | 39381 | 5.6  | Paraoxonase 2                                                                                                                             |
| 2468 | UPI00004575B2    | 3                    | 7              | 10.5                  | 352    | 38946 | 5.5  | Serum paraoxonase/arylesterase 2 (EC 3.1.1.2) (EC 3.1.8.1) (PON 2) (Serum aryldialkylphosphatase 2) (A-esterase 2) (Aromatic esterase 2). |
| 2468 | Q15165-2         | 3                    | 7              | 10.5                  | 354    | 39397 | 5.6  | Isoform 2 of Q15165                                                                                                                       |
| 2468 | Q15165           | 3                    | 7              | 10.5                  | 354    | 39398 | 5.5  | Serum paraoxonase/arylesterase 2                                                                                                          |
| 2469 | UPI0000F24437    | 3                    | 5              | 11.7                  | 350    | 38802 | 6.1  | 2-OXOISOVALERATE DEHYDROGENASE BETA SUBUNIT                                                                                               |
| 2469 | P21953           | 3                    | 5              | 10.5                  | 392    | 43123 | 6.3  | 2-oxoisovalerate dehydrogenase subunit beta, mitochondrial precursor                                                                      |
| 2470 | Q14232           | 3                    | 3              | 10.5                  | 305    | 33712 | 7.3  | Translation initiation factor eIF-2B subunit alpha                                                                                        |
| 2470 | UPI00004566B0    | 3                    | 3              | 10.5                  | 305    | 33648 | 6.9  | Translation initiation factor eIF-2B subunit alpha (eIF-2B GDP-GTP exchange factor subunit alpha).                                        |
| 2471 | Q8NBL1           | 3                    | 4              | 10.5                  | 392    | 46189 | 8.7  | KTEL motif-containing protein 1 precursor                                                                                                 |
| 2471 | UPI0000073BB0    | 3                    | 4              | 10.5                  | 392    | 46221 | 8.7  | chromosome 3 open reading frame 9                                                                                                         |



| No.  | Accession Number | Unique Peptide Count | Spectrum Count | Sequence Coverage (%) | Length | MolWt | pI   | Descriptive Name                                                                                                                            |
|------|------------------|----------------------|----------------|-----------------------|--------|-------|------|---------------------------------------------------------------------------------------------------------------------------------------------|
| 2472 | Q96EQ0           | 3                    | 4              | 10.5                  | 304    | 33429 | 4.9  | Small glutamine-rich tetratricopeptide repeat-containing protein B                                                                          |
| 2473 | Q86WV4           | 3                    | 4              | 13.6                  | 302    | 35148 | 9.1  | MRPS9 protein                                                                                                                               |
| 2473 | P82933           | 3                    | 4              | 10.4                  | 396    | 45823 | 9.6  | 28S ribosomal protein S9, mitochondrial precursor                                                                                           |
| 2473 | Q6PG40           | 3                    | 4              | 10.4                  | 396    | 45835 | 9.5  | Mitochondrial ribosomal protein S9                                                                                                          |
| 2474 | O43660-2         | 3                    | 5              | 10.5                  | 505    | 56290 | 9.2  | Isoform 2 of O43660                                                                                                                         |
| 2474 | O43660           | 3                    | 5              | 10.3                  | 514    | 57194 | 9.2  | Pleiotropic regulator 1                                                                                                                     |
| 2475 | O95400           | 3                    | 3              | 10.3                  | 341    | 37646 | 4.6  | CD2 antigen cytoplasmic tail-binding protein 2                                                                                              |
| 2476 | Q8IZV5           | 3                    | 4              | 10.3                  | 341    | 38087 | 7.4  | Retinol dehydrogenase 10                                                                                                                    |
| 2477 | O75569-2         | 3                    | 6              | 10.6                  | 302    | 33123 | 8.4  | Isoform 2 of O75569                                                                                                                         |
| 2477 | O75569           | 3                    | 6              | 10.2                  | 313    | 34404 | 8.4  | Interferon-inducible double stranded RNA-dependent protein kinase activator A                                                               |
| 2478 | P35813           | 3                    | 3              | 10.2                  | 382    | 42448 | 5.4  | Protein phosphatase 2C isoform alpha                                                                                                        |
| 2479 | P50452           | 3                    | 3              | 10.2                  | 374    | 42786 | 5.6  | Serpin B8                                                                                                                                   |
| 2479 | UPI000013C5F2    | 3                    | 3              | 10.2                  | 374    | 42767 | 5.6  | serine (or cysteine) proteinase inhibitor, clade B (ovalbumin), member 8 isoform a                                                          |
| 2479 | Q7Z2V6           | 3                    | 3              | 10.2                  | 374    | 42737 | 5.6  | Hypothetical protein DKFZp686O02190                                                                                                         |
| 2480 | Q96JY6           | 3                    | 6              | 10.2                  | 352    | 37459 | 8.7  | PDZ and LIM domain protein 2                                                                                                                |
| 2481 | Q05DL3           | 3                    | 3              | 14.7                  | 232    | 26702 | 9.7  | Hypothetical protein                                                                                                                        |
| 2481 | Q6PJ06           | 3                    | 3              | 13                    | 261    | 29825 | 9.8  | CSNK1A1 protein                                                                                                                             |
| 2481 | P67827           | 3                    | 3              | 10.5                  | 325    | 37567 | 9.5  | Casein kinase I isoform alpha                                                                                                               |
| 2481 | P48729           | 3                    | 3              | 10.1                  | 337    | 38915 | 9.6  | Casein kinase I isoform alpha                                                                                                               |
| 2481 | Q5U046           | 3                    | 3              | 10.1                  | 337    | 38905 | 9.6  | Casein kinase 1, alpha 1                                                                                                                    |
| 2481 | P67962           | 3                    | 3              | 10.1                  | 337    | 38901 | 9.6  | Casein kinase I isoform alpha                                                                                                               |
| 2481 | UPI000053FD0F    | 3                    | 3              | 9.3                   | 365    | 41937 | 9.6  | casein kinase 1, alpha 1 isoform 1                                                                                                          |
| 2481 | Q4JJA0           | 3                    | 3              | 9.3                   | 365    | 41938 | 9.5  | Casein kinase 1 alpha 1                                                                                                                     |
| 2482 | Q14344           | 3                    | 11             | 10.1                  | 377    | 44050 | 8    | Guanine nucleotide-binding protein alpha-13 subunit                                                                                         |
| 2483 | UPI00001C156B    | 3                    | 6              | 12.6                  | 254    | 28263 | 8.6  | peroxisomal acyl-CoA thioesterase 1 isoform c                                                                                               |
| 2483 | O14734           | 3                    | 6              | 10                    | 319    | 35914 | 7.6  | Acyl-coenzyme A thioesterase 8                                                                                                              |
| 2483 | Q6FHI2           | 3                    | 6              | 10                    | 319    | 35957 | 7.8  | PTE1 protein                                                                                                                                |
| 2484 | UPI000045619C    | 3                    | 8              | 11.9                  | 370    | 38212 | 4.6  | Syndecan-3 (SYND3).                                                                                                                         |
| 2484 | O75056-2         | 3                    | 8              | 11.9                  | 370    | 38246 | 4.6  | Isoform 3 of O75056                                                                                                                         |
| 2484 | O75056-1         | 3                    | 8              | 11.5                  | 384    | 39636 | 4.6  | Isoform 2 of O75056                                                                                                                         |
| 2484 | O75056           | 3                    | 8              | 10                    | 442    | 45497 | 4.7  | Syndecan-3                                                                                                                                  |
| 2484 | UPI000006FA8A    | 3                    | 8              | 10                    | 442    | 45496 | 4.7  | syndecan 3                                                                                                                                  |
| 2484 | UPI0000DD798E    | 3                    | 8              | 9.4                   | 467    | 49600 | 4.9  | PREDICTED: similar to syndecan 3 isoform 2                                                                                                  |
| 2485 | Q14320           | 3                    | 6              | 10                    | 339    | 40242 | 6.8  | Protein FAM50A                                                                                                                              |
| 2486 | Q6I9T0           | 3                    | 4              | 10                    | 280    | 31236 | 6    | FHL3 protein                                                                                                                                |
| 2486 | Q9P100           | 3                    | 4              | 10                    | 280    | 31282 | 6.2  | LIM-only protein FHL3                                                                                                                       |
| 2486 | Q9BVA2           | 3                    | 4              | 10                    | 280    | 31192 | 6.2  | Four and a half LIM domains 3                                                                                                               |
| 2487 | O60547           | 3                    | 4              | 9.9                   | 372    | 41950 | 7.3  | GDP-mannose 4,6 dehydratase                                                                                                                 |
| 2488 | Q6I9R1           | 3                    | 4              | 10.7                  | 373    | 40539 | 8.5  | MSSP-1                                                                                                                                      |
| 2488 | P29558-3         | 3                    | 4              | 10.7                  | 373    | 40516 | 8.4  | Isoform 3 of P29558                                                                                                                         |
| 2488 | UPI00001606B9    | 3                    | 4              | 10.3                  | 389    | 42348 | 8.8  | RNA binding motif, single stranded interacting protein 1 isoform b                                                                          |
| 2488 | Q14869           | 3                    | 4              | 10.3                  | 389    | 42335 | 8.7  | MSSP-2 protein                                                                                                                              |
| 2488 | P29558           | 3                    | 4              | 9.9                   | 406    | 44505 | 8.8  | RNA-binding motif, single-stranded-interacting protein 1                                                                                    |
| 2488 | P29558-2         | 3                    | 4              | 9.9                   | 403    | 44137 | 8.7  | Isoform 2 of P29558                                                                                                                         |
| 2489 | UPI00001E058D    | 3                    | 3              | 12.7                  | 363    | 40729 | 5.6  | ubiquitin-activating enzyme E1C isoform 3                                                                                                   |
| 2489 | UPI000015F415    | 3                    | 3              | 10.2                  | 449    | 50072 | 5.3  | ubiquitin-activating enzyme E1C isoform 2                                                                                                   |
| 2489 | Q8TBC4           | 3                    | 3              | 9.9                   | 463    | 51852 | 5.5  | NEDD8-activating enzyme E1 catalytic subunit                                                                                                |
| 2489 | UPI0000EFE338    | 3                    | 3              | 5.7                   | 805    | 89241 | 5.5  | Maltose binding protein/NEDD8-activating enzy                                                                                               |
| 2490 | Q53RY7           | 3                    | 4              | 9.8                   | 522    | 57458 | 9.4  | Hypothetical protein EIF2B4                                                                                                                 |
| 2490 | Q9UI10           | 3                    | 4              | 9.8                   | 523    | 57557 | 9.4  | Translation initiation factor eIF-2B subunit delta                                                                                          |
| 2490 | UPI000016A377    | 3                    | 4              | 9.4                   | 543    | 59630 | 9.4  | eukaryotic translation initiation factor 2B, subunit 4 delta isoform 1                                                                      |
| 2490 | Q9UI10-2         | 3                    | 4              | 9.4                   | 544    | 59715 | 9.4  | Isoform 2 of Q9UI10                                                                                                                         |
| 2491 | Q5VT94           | 3                    | 17             | 9.8                   | 325    | 35282 | 10.1 | Growth hormone inducible transmembrane protein                                                                                              |
| 2491 | UPI0000D60F83    | 3                    | 17             | 9.8                   | 325    | 35169 | 10.1 | Growth hormone-inducible transmembrane protein (Dermal papilla-derived protein 2) (Transmembrane BAX inhibitor motif-containing protein 5). |
| 2491 | Q9H3K2           | 3                    | 17             | 9.3                   | 345    | 37205 | 9.9  | Growth hormone-inducible transmembrane protein                                                                                              |
| 2491 | Q6FIA7           | 3                    | 17             | 9.3                   | 345    | 37279 | 10   | GHITM protein                                                                                                                               |
| 2492 | Q6PIU2           | 3                    | 6              | 9.8                   | 408    | 45808 | 7.2  | Arylacетamide deacetylase-like 1                                                                                                            |
| 2492 | UPI0000050344    | 3                    | 6              | 9.1                   | 440    | 49063 | 7.9  | arylacетamide deacetylase-like 1                                                                                                            |
| 2493 | Q9NPL8           | 3                    | 4              | 9.8                   | 285    | 32178 | 8.5  | Uncharacterized protein C3orf1                                                                                                              |
| 2494 | Q9Y5A9-2         | 3                    | 6              | 10.8                  | 529    | 56877 | 8.9  | Isoform 2 of Q9Y5A9                                                                                                                         |
| 2494 | UPI0000456197    | 3                    | 6              | 10                    | 569    | 61192 | 9.1  | YTH domain family protein 2 (High-glucose-regulated protein 8) (CLL- associated antigen KW-14) (Renal carcinoma antigen NY-REN-2).          |
| 2494 | Q9Y5A9           | 3                    | 6              | 9.8                   | 579    | 62334 | 8.8  | YTH domain family protein 2                                                                                                                 |
| 2495 | P46937           | 3                    | 3              | 9.7                   | 454    | 48755 | 5.1  | 65 kDa Yes-associated protein                                                                                                               |
| 2495 | Q7Z574           | 3                    | 3              | 9                     | 488    | 52748 | 5.1  | Yes-associated protein 2                                                                                                                    |
| 2495 | Q8IUY9           | 3                    | 3              | 8.7                   | 504    | 54462 | 5.2  | YAP1 protein                                                                                                                                |
| 2496 | Q96DZ1           | 3                    | 3              | 9.7                   | 483    | 54858 | 6.3  | XTP3-transactivated gene B protein precursor                                                                                                |
| 2496 | UPI0000D6119E    | 3                    | 3              | 9.7                   | 485    | 55058 | 6.4  | XTP3-transactivated gene B protein precursor.                                                                                               |
| 2497 | Q96J01           | 3                    | 3              | 9.7                   | 351    | 38772 | 6.1  | THO complex subunit 3                                                                                                                       |
| 2497 | UPI000013E86B    | 3                    | 3              | 9.7                   | 350    | 38659 | 6.1  | UPI000013E86B UniRef100 entry                                                                                                               |

| No.  | Accession Number | Unique Peptide Count | Spectrum Count | Sequence Coverage (%) | Length | MolWt | pI   | Descriptive Name                                                                                                                        |
|------|------------------|----------------------|----------------|-----------------------|--------|-------|------|-----------------------------------------------------------------------------------------------------------------------------------------|
| 2498 | A2AB02           | 3                    | 4              | 9.6                   | 261    | 29460 | 8.6  | Nurim                                                                                                                                   |
| 2498 | Q8IXM6           | 3                    | 4              | 9.5                   | 262    | 29379 | 8.6  | Nurim                                                                                                                                   |
| 2499 | Q86XZ2           | 3                    | 3              | 10.3                  | 435    | 50738 | 6.7  | PPP2R5E protein                                                                                                                         |
| 2499 | Q58EX4           | 3                    | 3              | 10.2                  | 441    | 51523 | 7.4  | PPP2R5E protein                                                                                                                         |
| 2499 | Q16537           | 3                    | 3              | 9.6                   | 467    | 54699 | 6.9  | Serine/threonine-protein phosphatase 2A 56 kDa regulatory subunit epsilon isoform                                                       |
| 2499 | Q562F2           | 3                    | 3              | 9.6                   | 467    | 54681 | 6.9  | Protein phosphatase 2, regulatory subunit B', epsilon isoform                                                                           |
| 2499 | Q3ZCW9           | 3                    | 3              | 9.6                   | 467    | 54704 | 7.2  | PPP2R5E protein                                                                                                                         |
| 2499 | Q59EKO           | 3                    | 3              | 9                     | 501    | 57956 | 8.2  | Epsilon isoform of regulatory subunit B56, protein phosphatase 2A variant                                                               |
| 2500 | Q8VWH5           | 3                    | 3              | 9.5                   | 349    | 37253 | 8.3  | Probable tRNA pseudouridine synthase 1                                                                                                  |
| 2501 | Q96ER3           | 3                    | 4              | 9.5                   | 475    | 53655 | 4.5  | Protein SAAL1                                                                                                                           |
| 2501 | UPI00001F9E3B    | 3                    | 4              | 9.5                   | 474    | 53558 | 4.5  | serum amyloid A-like 1                                                                                                                  |
| 2502 | Q9BRX2           | 3                    | 4              | 9.4                   | 385    | 43377 | 6.3  | Protein pelota homolog                                                                                                                  |
| 2502 | UPI000013D9FE    | 3                    | 4              | 9.4                   | 385    | 43359 | 6.3  | pelota homolog                                                                                                                          |
| 2503 | Q15050           | 3                    | 5              | 9.3                   | 365    | 41193 | 10.7 | Ribosome biogenesis regulatory protein homolog                                                                                          |
| 2504 | Q9Y4A4           | 3                    | 3              | 9.4                   | 381    | 41787 | 5.8  | F22162_1                                                                                                                                |
| 2504 | Q8NFBZ8          | 3                    | 3              | 9.3                   | 388    | 42785 | 6.3  | Immunoglobulin superfamily member 4C                                                                                                    |
| 2505 | Q16254           | 3                    | 5              | 9.2                   | 413    | 43960 | 4.7  | Transcription factor E2F4                                                                                                               |
| 2505 | UPI0000D61A05    | 3                    | 5              | 9.1                   | 417    | 44403 | 4.8  | Transcription factor E2F4 (E2F-4).                                                                                                      |
| 2506 | Q8TD55           | 3                    | 3              | 9.2                   | 490    | 53350 | 5.4  | Pleckstrin homology domain-containing family Q member 1                                                                                 |
| 2507 | Q96S82           | 3                    | 4              | 9.2                   | 380    | 40510 | 5.1  | Ubiquitin-like protein 7                                                                                                                |
| 2508 | Q9NZD8           | 3                    | 3              | 9.1                   | 308    | 34960 | 6.3  | Maspardin                                                                                                                               |
| 2509 | UPI00001F9B06    | 3                    | 3              | 11.3                  | 265    | 27935 | 7.1  | Protein TSSC4 (Tumor-suppressing subchromosomal transferable fragment candidate gene 4 protein) (Tumor-suppressing STF cDNA 4 protein). |
| 2509 | Q9Y5U2-2         | 3                    | 3              | 11.3                  | 265    | 27895 | 7.1  | Isoform 2 of Q9Y5U2                                                                                                                     |
| 2509 | Q9Y5U2           | 3                    | 3              | 9.1                   | 329    | 34285 | 5.1  | Protein TSSC4                                                                                                                           |
| 2509 | UPI0000161FA5    | 3                    | 3              | 9.1                   | 329    | 34326 | 5.2  | tumor suppressing subtransferable candidate 4                                                                                           |
| 2510 | UPI000013ED31    | 3                    | 6              | 9.7                   | 360    | 39834 | 6.6  | GDP-mannose pyrophosphorylase B isoform 2                                                                                               |
| 2510 | Q9Y5P6           | 3                    | 6              | 9.7                   | 360    | 39862 | 6.8  | GDP-mannose pyrophosphorylase B                                                                                                         |
| 2510 | Q9H7U3           | 3                    | 6              | 9                     | 387    | 42650 | 6.4  | CDNA FLJ14257 fis, clone PLACE1000547, highly similar to Homo sapiens GDP-mannose pyrophosphorylase B (GMPPB) mRNA                      |
| 2510 | UPI000013ED26    | 3                    | 6              | 9                     | 387    | 42622 | 6.3  | GDP-mannose pyrophosphorylase B isoform 2                                                                                               |
| 2511 | P42785           | 3                    | 3              | 8.9                   | 496    | 55800 | 7.2  | Lysosomal Pro-X carboxypeptidase precursor                                                                                              |
| 2511 | UPI00001FB052    | 3                    | 3              | 8.5                   | 517    | 58100 | 7.4  | prolylcarboxypeptidase isoform 2 preproprotein                                                                                          |
| 2512 | UPI0000D612A0    | 3                    | 6              | 13                    | 231    | 25489 | 6    | cAMP response element-binding protein (CREB).                                                                                           |
| 2512 | Q6V963           | 3                    | 6              | 13                    | 230    | 25445 | 5.5  | CREB                                                                                                                                    |
| 2512 | Q53X93           | 3                    | 6              | 9.2                   | 327    | 35136 | 5.3  | CREB1 protein                                                                                                                           |
| 2512 | P16220           | 3                    | 6              | 8.8                   | 341    | 36688 | 5.6  | cAMP response element-binding protein                                                                                                   |
| 2513 | P22694-4         | 3                    | 3              | 9.2                   | 338    | 39379 | 8.8  | Isoform 4 of P22694                                                                                                                     |
| 2513 | P22694-3         | 3                    | 3              | 9.1                   | 339    | 39477 | 8.8  | Isoform 3 of P22694                                                                                                                     |
| 2513 | P22694           | 3                    | 3              | 8.8                   | 351    | 40623 | 8.8  | cAMP-dependent protein kinase, beta-catalytic subunit                                                                                   |
| 2513 | P22694-5         | 3                    | 3              | 8.8                   | 354    | 40947 | 8.7  | Isoform 5 of P22694                                                                                                                     |
| 2513 | P22694-7         | 3                    | 3              | 8.7                   | 355    | 41046 | 8.7  | Isoform 7 of P22694                                                                                                                     |
| 2513 | P22694-6         | 3                    | 3              | 8.7                   | 357    | 41296 | 8.6  | Isoform 6 of P22694                                                                                                                     |
| 2513 | Q14VH1           | 3                    | 3              | 7.8                   | 398    | 46236 | 8.7  | Protein kinase, cAMP-dependent, catalytic, beta                                                                                         |
| 2514 | P08621-2         | 3                    | 10             | 8.9                   | 428    | 50618 | 9.9  | Isoform 2 of P08621                                                                                                                     |
| 2514 | P08621           | 3                    | 10             | 8.7                   | 437    | 51557 | 9.9  | U1 small nuclear ribonucleoprotein 70 kDa                                                                                               |
| 2515 | Q53FA7           | 3                    | 5              | 8.7                   | 332    | 35536 | 7.2  | Putative quinone oxidoreductase                                                                                                         |
| 2516 | Q969G3-2         | 3                    | 6              | 9.6                   | 363    | 41780 | 6    | Isoform 2 of Q969G3                                                                                                                     |
| 2516 | Q969G3           | 3                    | 6              | 8.5                   | 411    | 46649 | 4.9  | SWI/SNF-related matrix-associated actin-dependent regulator of chromatin subfamily E member 1                                           |
| 2517 | Q9Y5B8           | 3                    | 3              | 8.5                   | 376    | 42492 | 6.5  | Nucleoside diphosphate kinase 7                                                                                                         |
| 2518 | Q2NLD4           | 3                    | 5              | 9.5                   | 285    | 32015 | 7    | PURA protein                                                                                                                            |
| 2518 | Q2NLC9           | 3                    | 5              | 9                     | 300    | 34166 | 9.2  | PURA protein                                                                                                                            |
| 2518 | Q00577           | 3                    | 5              | 8.4                   | 322    | 34911 | 6.4  | Transcriptional activator protein Pur-alpha                                                                                             |
| 2518 | Q56A79           | 3                    | 5              | 8.4                   | 322    | 34939 | 6.7  | Purine-rich element binding protein A                                                                                                   |
| 2519 | Q08752           | 3                    | 5              | 8.4                   | 370    | 40764 | 7.2  | 40 kDa peptidyl-prolyl cis-trans isomerase                                                                                              |
| 2519 | Q6FGM6           | 3                    | 5              | 8.4                   | 370    | 40773 | 7.2  | PPID protein                                                                                                                            |
| 2520 | Q9NR50           | 3                    | 4              | 8.4                   | 452    | 50240 | 6.5  | Translation initiation factor eIF-2B subunit gamma                                                                                      |
| 2521 | Q96JB5           | 3                    | 5              | 8.3                   | 506    | 56921 | 4.8  | CDK5 regulatory subunit-associated protein 3                                                                                            |
| 2521 | UPI000021D212    | 3                    | 5              | 8.3                   | 507    | 56947 | 4.8  | CDK5 regulatory subunit-associated protein 3 (CDK5 activator-binding protein C53) (HSF-27 protein).                                     |
| 2522 | Q9NXW2           | 3                    | 4              | 8.3                   | 375    | 41860 | 8.7  | DnaJ homolog subfamily B member 12                                                                                                      |
| 2523 | P49419           | 3                    | 4              | 8.2                   | 511    | 55366 | 6.9  | Alpha-aminoacidic semialdehyde dehydrogenase                                                                                            |
| 2523 | UPI0000DD7CFB    | 3                    | 4              | 7.7                   | 549    | 59228 | 8    | PREDICTED: similar to antiqutin                                                                                                         |
| 2524 | Q53EY9           | 3                    | 3              | 8.2                   | 403    | 44478 | 7    | F-box only protein 22 isoform a variant                                                                                                 |
| 2524 | Q8NEZ5           | 3                    | 3              | 8.2                   | 403    | 44508 | 7    | F-box only protein 22                                                                                                                   |
| 2525 | Q5JRG1           | 3                    | 6              | 8.2                   | 463    | 49095 | 7.8  | Nucleoporin like 1                                                                                                                      |
| 2525 | Q5JRG2           | 3                    | 6              | 7.8                   | 485    | 50210 | 8.7  | Nucleoporin like 1                                                                                                                      |
| 2525 | UPI00004A074B    | 3                    | 6              | 7.4                   | 516    | 53913 | 7.8  | nucleoporin like 1 isoform c                                                                                                            |
| 2525 | UPI00004A074A    | 3                    | 6              | 6.5                   | 587    | 59754 | 9.3  | nucleoporin like 1 isoform b                                                                                                            |

| No.  | Accession Number | Unique Peptide Count | Spectrum Count | Sequence Coverage (%) | Length | MolWt | pI   | Descriptive Name                                                                                                                                                                                                                                         |
|------|------------------|----------------------|----------------|-----------------------|--------|-------|------|----------------------------------------------------------------------------------------------------------------------------------------------------------------------------------------------------------------------------------------------------------|
| 2525 | Q9BVL2           | 3                    | 6              | 6.3                   | 599    | 60897 | 9.3  | Nucleoporin p58/p45                                                                                                                                                                                                                                      |
| 2526 | Q96FZ2           | 3                    | 3              | 8.2                   | 354    | 40575 | 8.1  | UPF0361 protein DC12                                                                                                                                                                                                                                     |
| 2526 | UPI0000D61B75    | 3                    | 3              | 7.8                   | 371    | 42244 | 8.9  | UPF0361 protein DC12.                                                                                                                                                                                                                                    |
| 2527 | Q05BU6           | 3                    | 5              | 15.9                  | 246    | 24847 | 6.3  | Hypothetical protein                                                                                                                                                                                                                                     |
| 2527 | Q6PJY9           | 3                    | 5              | 15.8                  | 247    | 24976 | 6.8  | SFRS11 protein                                                                                                                                                                                                                                           |
| 2527 | Q6PKC9           | 3                    | 5              | 12.1                  | 321    | 34277 | 11.5 | SFRS11 protein                                                                                                                                                                                                                                           |
| 2527 | Q5T760           | 3                    | 5              | 10                    | 389    | 42316 | 11.7 | Splicing factor, arginine/serine-rich 11                                                                                                                                                                                                                 |
| 2527 | Q6PJB9           | 3                    | 5              | 9.9                   | 394    | 42957 | 11.7 | SFRS11 protein                                                                                                                                                                                                                                           |
| 2527 | Q05519           | 3                    | 5              | 8.1                   | 484    | 53542 | 10.5 | Splicing factor arginine/serine-rich 11                                                                                                                                                                                                                  |
| 2527 | Q8IWE6           | 3                    | 5              | 8.1                   | 483    | 53414 | 10.5 | Splicing factor, arginine/serine-rich 11                                                                                                                                                                                                                 |
| 2528 | Q8IX04-4         | 3                    | 3              | 11.1                  | 341    | 37611 | 6.2  | Isoform 4 of Q8IX04                                                                                                                                                                                                                                      |
| 2528 | Q8IX04-3         | 3                    | 3              | 10.6                  | 357    | 39778 | 6.4  | Isoform 3 of Q8IX04                                                                                                                                                                                                                                      |
| 2528 | Q8IX04-2         | 3                    | 3              | 10                    | 379    | 42292 | 6.5  | Isoform 2 of Q8IX04                                                                                                                                                                                                                                      |
| 2528 | Q8IX04           | 3                    | 3              | 8.1                   | 471    | 52264 | 7.1  | Ubiquitin-conjugating enzyme E2 variant 3                                                                                                                                                                                                                |
| 2529 | Q96P63           | 3                    | 3              | 8.4                   | 405    | 46276 | 5.5  | Serpin B12                                                                                                                                                                                                                                               |
| 2529 | Q3SYB4           | 3                    | 3              | 8                     | 425    | 48446 | 5.4  | SERPINB12 protein                                                                                                                                                                                                                                        |
| 2530 | Q9Y606           | 3                    | 4              | 8                     | 427    | 47470 | 8.4  | tRNA pseudouridine synthase A                                                                                                                                                                                                                            |
| 2531 | UPI0000519472    | 3                    | 3              | 9.4                   | 445    | 50625 | 5.3  | amyloid beta precursor protein-binding protein 1 isoform c                                                                                                                                                                                               |
| 2531 | UPI0000519471    | 3                    | 3              | 8                     | 528    | 59420 | 5.2  | amyloid beta precursor protein-binding protein 1 isoform b                                                                                                                                                                                               |
| 2531 | Q13564           | 3                    | 3              | 7.9                   | 534    | 60246 | 5.4  | NEDD8-activating enzyme E1 regulatory subunit                                                                                                                                                                                                            |
| 2531 | UPI0000EFE337    | 3                    | 3              | 7.8                   | 536    | 60391 | 5.4  | NEDD8-activating enzyme E1 regulatory subunit                                                                                                                                                                                                            |
| 2532 | Q6P1J9           | 3                    | 4              | 7.9                   | 531    | 60577 | 9.6  | Parafibromin                                                                                                                                                                                                                                             |
| 2532 | UPI0000D62067    | 3                    | 4              | 7.9                   | 531    | 60577 | 9.7  | Parafibromin (Cell division cycle protein 73 homolog) (Hyperparathyroidism 2 protein).                                                                                                                                                                   |
| 2533 | Q60861-2         | 3                    | 4              | 9.5                   | 336    | 39206 | 6.7  | Isoform 2 of Q60861                                                                                                                                                                                                                                      |
| 2533 | Q60861           | 3                    | 4              | 7.8                   | 412    | 47266 | 7.6  | Growth-arrest-specific protein 7                                                                                                                                                                                                                         |
| 2533 | Q59GS9           | 3                    | 4              | 7.7                   | 415    | 47577 | 7.8  | Growth arrest-specific 7 isoform b variant                                                                                                                                                                                                               |
| 2534 | Q96F86           | 3                    | 3              | 7.7                   | 508    | 56078 | 7.1  | Enhancer of mRNA-decapping protein 3                                                                                                                                                                                                                     |
| 2535 | A2A302           | 3                    | 3              | 7.6                   | 646    | 73140 | 7.2  | Rho guanine nucleotide exchange factor (GEF) 7                                                                                                                                                                                                           |
| 2535 | Q5W9H0           | 3                    | 3              | 7.2                   | 680    | 77070 | 6.8  | KIAA0142 splice variant 2                                                                                                                                                                                                                                |
| 2535 | Q5T2V0           | 3                    | 3              | 7                     | 705    | 79832 | 6.7  | Rho guanine nucleotide exchange factor (GEF) 7                                                                                                                                                                                                           |
| 2536 | Q94919           | 3                    | 6              | 7.6                   | 500    | 55017 | 5.7  | Endonuclease domain-containing 1 protein precursor                                                                                                                                                                                                       |
| 2537 | P56182           | 3                    | 3              | 7.6                   | 461    | 52839 | 9.3  | RRP1-like protein                                                                                                                                                                                                                                        |
| 2537 | UPI000013E05F    | 3                    | 3              | 7.6                   | 461    | 52942 | 9.4  | NNP-1 protein (Novel nuclear protein 1) (Nucleolar protein Nop52) (D21S2056E).                                                                                                                                                                           |
| 2537 | Q53FR7           | 3                    | 3              | 7.6                   | 461    | 52853 | 9.4  | Nucleolar protein NOP52 variant                                                                                                                                                                                                                          |
| 2537 | Q6PJJ2           | 3                    | 3              | 7.5                   | 466    | 53413 | 9.5  | D21S2056E protein                                                                                                                                                                                                                                        |
| 2538 | Q06265           | 3                    | 4              | 7.6                   | 423    | 46978 | 5.2  | Exosome complex exonuclease RRP45                                                                                                                                                                                                                        |
| 2538 | Q86Y48           | 3                    | 4              | 7.3                   | 439    | 48949 | 5.3  | Polymyositis/scleroderma autoantigen 1                                                                                                                                                                                                                   |
| 2538 | Q86Y41           | 3                    | 4              | 7                     | 456    | 50803 | 5.3  | Polymyositis/scleroderma autoantigen 1                                                                                                                                                                                                                   |
| 2539 | Q53GS9           | 3                    | 8              | 7.6                   | 565    | 65381 | 8.9  | U4/U6.U5 tri-snRNP-associated protein 2                                                                                                                                                                                                                  |
| 2540 | Q86T14           | 3                    | 4              | 9.7                   | 320    | 34597 | 7.7  | Full-length cDNA clone CS0DH001YP08 of T cells (Jurkat cell line) of Homo sapiens                                                                                                                                                                        |
| 2540 | UPI00003669A7    | 3                    | 4              | 8.9                   | 347    | 38088 | 8.6  | guanosine monophosphate reductase 2 (GMPR2), transcript variant 2, mRNA                                                                                                                                                                                  |
| 2540 | Q9P2T1           | 3                    | 4              | 8.9                   | 348    | 37874 | 7.2  | GMP reductase 2                                                                                                                                                                                                                                          |
| 2540 | Q7Z527           | 3                    | 4              | 8.9                   | 350    | 38517 | 8.8  | GMP dehydrogenase                                                                                                                                                                                                                                        |
| 2540 | Q6PKC0           | 3                    | 4              | 7.6                   | 409    | 45008 | 8.3  | GMPR2 protein                                                                                                                                                                                                                                            |
| 2541 | Q9BUL2           | 3                    | 3              | 8.1                   | 482    | 53004 | 8.5  | PNKP protein                                                                                                                                                                                                                                             |
| 2541 | Q96T60           | 3                    | 3              | 7.5                   | 521    | 57076 | 8.5  | Bifunctional polynucleotide phosphatase/kinase (Polynucleotide kinase- 3'-phosphatase) (DNA 5'-kinase/3'-phosphatase) [Includes: Polynucleotide 3'-phosphatase (EC 3.1.3.32) (2'(3')-polynucleotidase); Polynucleotide 5'-hydroxyl-kinase (EC 2.7.1.78)] |
| 2542 | Q9Y5X2           | 3                    | 6              | 7.5                   | 465    | 52569 | 7.4  | Sorting nexin-8                                                                                                                                                                                                                                          |
| 2543 | P80404           | 3                    | 6              | 7.4                   | 500    | 56439 | 8    | 4-aminobutyrate aminotransferase, mitochondrial precursor (EC 2.6.1.19) ((S)-3-amino-2-methylpropionate transaminase)                                                                                                                                    |
| 2544 | Q16610           | 3                    | 7              | 7.4                   | 540    | 60674 | 6.7  | Extracellular matrix protein 1 precursor                                                                                                                                                                                                                 |
| 2544 | UPI0000043C2E    | 3                    | 7              | 7.4                   | 540    | 60704 | 6.7  | extracellular matrix protein 1 isoform 1 precursor                                                                                                                                                                                                       |
| 2544 | Q8IZ60           | 3                    | 7              | 7.4                   | 540    | 60734 | 6.7  | Extracellular matrix protein 1                                                                                                                                                                                                                           |
| 2544 | Q5T5G4           | 3                    | 7              | 7.1                   | 567    | 63563 | 6.9  | Extracellular matrix protein 1                                                                                                                                                                                                                           |
| 2545 | UPI000045753E    | 3                    | 5              | 9.2                   | 520    | 57444 | 5.7  | KIAA0241 (KIAA0241), mRNA                                                                                                                                                                                                                                |
| 2545 | Q8NBF6-2         | 3                    | 5              | 8.1                   | 591    | 65313 | 6    | Isoform 2 of Q8NBF6                                                                                                                                                                                                                                      |
| 2545 | Q8NBF6           | 3                    | 5              | 7.4                   | 648    | 71947 | 6.2  | Protein KIAA0241                                                                                                                                                                                                                                         |
| 2546 | UPI000014077B    | 3                    | 4              | 7.7                   | 414    | 47829 | 8.5  | tRNA-nucleotidyltransferase 1, mitochondrial precursor (EC 2.7.7.25) (Mitochondrial tRNA nucleotidyl transferase, CCA-adding) (mt tRNA adenylyltransferase) (mt tRNA CCA-pyrophosphorylase) (mt tRNA CCA-diphosphorylase) (mt CCA-adding enzyme).        |
| 2546 | Q96Q11-2         | 3                    | 4              | 7.7                   | 414    | 47845 | 8.5  | Isoform 2 of Q96Q11                                                                                                                                                                                                                                      |
| 2546 | Q96Q11           | 3                    | 4              | 7.4                   | 434    | 50144 | 8.1  | tRNA-nucleotidyltransferase 1, mitochondrial precursor                                                                                                                                                                                                   |

| No.  | Accession Number | Unique Peptide Count | Spectrum Count | Sequence Coverage (%) | Length | MolWt | pI  | Descriptive Name                                                                                                                                                                                                                                |
|------|------------------|----------------------|----------------|-----------------------|--------|-------|-----|-------------------------------------------------------------------------------------------------------------------------------------------------------------------------------------------------------------------------------------------------|
| 2546 | UPI000013CD08    | 3                    | 4              | 7.4                   | 434    | 50128 | 8.1 | tRNA-nucleotidyltransferase 1, mitochondrial precursor (EC 2.7.7.25) (Mitochondrial tRNA nucleotidyl transferase, CCA-adding) (mt tRNA adenyltransferase) (mt tRNA CCA-pyrophosphorylase) (mt tRNA CCA-diphosphorylase) (mt CCA-adding enzyme). |
| 2547 | Q2TU87           | 3                    | 6              | 10.8                  | 287    | 32821 | 6   | Growth-inhibiting protein 25                                                                                                                                                                                                                    |
| 2547 | P01011           | 3                    | 6              | 7.3                   | 423    | 47651 | 5.5 | Alpha-1-antichymotrypsin precursor (ACT) [Contains: Alpha-1- antichymotrypsin His-Pro-less]                                                                                                                                                     |
| 2548 | Q1RMZ4           | 3                    | 5              | 7.3                   | 453    | 49673 | 6.3 | LOC148756 protein                                                                                                                                                                                                                               |
| 2548 | Q6ZV30           | 3                    | 5              | 5.4                   | 606    | 66524 | 6.9 | CDNA FLJ43068 fis, clone BRTHA3008778, moderately similar to Acetyl- coenzyme A synthetase                                                                                                                                                      |
| 2548 | Q9NUB1-2         | 3                    | 5              | 4.8                   | 687    | 74626 | 7.2 | Isoform 2 of Q9NUB1                                                                                                                                                                                                                             |
| 2548 | Q9NUB1           | 3                    | 5              | 4.8                   | 689    | 74857 | 7.1 | Acetyl-coenzyme A synthetase 2-like, mitochondrial precursor                                                                                                                                                                                    |
| 2548 | Q7Z5G3           | 3                    | 5              | 4.8                   | 687    | 74659 | 7.2 | Acyl-CoA synthetase short-chain family member 1                                                                                                                                                                                                 |
| 2549 | Q8NBF2           | 3                    | 4              | 7.3                   | 726    | 79444 | 5.6 | NHL repeat-containing protein 2                                                                                                                                                                                                                 |
| 2550 | UPI0000D62147    | 3                    | 4              | 8.9                   | 337    | 37122 | 7   | Apolipoprotein-L2 (Apolipoprotein L-II) (ApoL-II).                                                                                                                                                                                              |
| 2550 | Q9BQE5           | 3                    | 4              | 8.9                   | 337    | 37092 | 6.7 | Apolipoprotein-L2                                                                                                                                                                                                                               |
| 2550 | Q59GW9           | 3                    | 4              | 7.2                   | 415    | 45687 | 8.6 | Apolipoprotein L2 variant                                                                                                                                                                                                                       |
| 2551 | Q96D46           | 3                    | 4              | 7.2                   | 503    | 57603 | 7.1 | Protein NMD3 homolog                                                                                                                                                                                                                            |
| 2551 | Q9Y2Z6           | 3                    | 4              | 7.2                   | 503    | 57585 | 7.1 | CGI-07 protein                                                                                                                                                                                                                                  |
| 2552 | Q13895           | 3                    | 3              | 7.1                   | 437    | 49601 | 8.1 | Bystin                                                                                                                                                                                                                                          |
| 2553 | UPI00000372F2    | 3                    | 4              | 9.1                   | 514    | 58604 | 6.2 | WD repeat domain 26                                                                                                                                                                                                                             |
| 2553 | Q9H7D7-2         | 3                    | 4              | 7.3                   | 645    | 70460 | 6.2 | Isoform 2 of Q9H7D7                                                                                                                                                                                                                             |
| 2553 | Q9H7D7           | 3                    | 4              | 7.1                   | 661    | 72124 | 6.2 | WD repeat protein 26                                                                                                                                                                                                                            |
| 2554 | Q9UHY1           | 3                    | 6              | 7.1                   | 535    | 59845 | 5.1 | Nuclear receptor-binding protein                                                                                                                                                                                                                |
| 2555 | P35243           | 3                    | 4              | 7                     | 200    | 23130 | 5.2 | Recoverin                                                                                                                                                                                                                                       |
| 2556 | O00499-9         | 3                    | 4              | 10                    | 409    | 45563 | 5.5 | Isoform BIN1                                                                                                                                                                                                                                    |
| 2556 | O00499-10        | 3                    | 4              | 9.7                   | 424    | 47491 | 6.6 | Isoform BIN1                                                                                                                                                                                                                                    |
| 2556 | O00499-7         | 3                    | 4              | 9.3                   | 439    | 48258 | 5.2 | Isoform I13 of O00499                                                                                                                                                                                                                           |
| 2556 | O00499-8         | 3                    | 4              | 9                     | 454    | 50185 | 5.9 | Isoform BIN1 of O00499                                                                                                                                                                                                                          |
| 2556 | O00499-4         | 3                    | 4              | 8.6                   | 475    | 51737 | 5   | Isoform IIC2 of O00499                                                                                                                                                                                                                          |
| 2556 | O00499-6         | 3                    | 4              | 8.5                   | 482    | 53020 | 5.3 | Isoform I12 of O00499                                                                                                                                                                                                                           |
| 2556 | Q8WVH9           | 3                    | 4              | 8.4                   | 490    | 53167 | 5.1 | Amphiphysin IIb-1                                                                                                                                                                                                                               |
| 2556 | O00499-11        | 3                    | 4              | 8.2                   | 497    | 54948 | 6   | Isoform BIN1+12A of O00499                                                                                                                                                                                                                      |
| 2556 | O00499-3         | 3                    | 4              | 8.1                   | 506    | 55175 | 5.2 | Isoform IIC1 of O00499                                                                                                                                                                                                                          |
| 2556 | O00499-2         | 3                    | 4              | 7.9                   | 518    | 56499 | 5.1 | Isoform IIB of O00499                                                                                                                                                                                                                           |
| 2556 | O00499-5         | 3                    | 4              | 7.5                   | 550    | 59937 | 5   | Isoform IID of O00499                                                                                                                                                                                                                           |
| 2556 | O00499           | 3                    | 4              | 6.9                   | 593    | 64699 | 5.1 | Myc box-dependent-interacting protein 1                                                                                                                                                                                                         |
| 2557 | P35610           | 3                    | 4              | 6.9                   | 550    | 64735 | 8.9 | Sterol O-acyltransferase 1                                                                                                                                                                                                                      |
| 2557 | UPI0000D62050    | 3                    | 4              | 6.9                   | 552    | 64907 | 8.9 | Sterol O-acyltransferase 1 (EC 2.3.1.26) (Cholesterol acyltransferase 1) (Acyl coenzyme A:cholesterol acyltransferase 1) (ACAT-1).                                                                                                              |
| 2558 | Q969S3           | 3                    | 3              | 6.9                   | 477    | 54272 | 6.2 | Zinc finger protein 622                                                                                                                                                                                                                         |
| 2559 | P48723           | 3                    | 6              | 6.8                   | 471    | 51928 | 5.8 | Stress 70 protein chaperone microsome-associated 60 kDa protein precursor                                                                                                                                                                       |
| 2559 | Q53FK2           | 3                    | 6              | 6.8                   | 471    | 51867 | 5.8 | Stress 70 protein chaperone, microsome-associated, 60kDa variant                                                                                                                                                                                |
| 2560 | Q5R363           | 3                    | 3              | 6.8                   | 547    | 62033 | 5.7 | SFRS protein kinase 1                                                                                                                                                                                                                           |
| 2560 | UPI000015FF90    | 3                    | 3              | 5.7                   | 654    | 74226 | 6.2 | Serine/threonine-protein kinase SRPK1 (EC 2.7.11.1) (Serine/arginine- rich protein-specific kinase 1) (SR-protein-specific kinase 1) (SFRS protein kinase 1).                                                                                   |
| 2560 | UPI000020DBDD    | 3                    | 3              | 5.6                   | 655    | 74325 | 6.2 | SFRS protein kinase 1                                                                                                                                                                                                                           |
| 2560 | Q96SB4-2         | 3                    | 3              | 5.6                   | 655    | 74320 | 6.2 | Isoform 2 of Q96SB4                                                                                                                                                                                                                             |
| 2560 | UPI0000D61435    | 3                    | 3              | 4.5                   | 825    | 92447 | 7.9 | Serine/threonine-protein kinase SRPK1 (EC 2.7.11.1) (Serine/arginine- rich protein-specific kinase 1) (SR-protein-specific kinase 1) (SFRS protein kinase 1).                                                                                   |
| 2560 | Q96SB4           | 3                    | 3              | 4.5                   | 826    | 92407 | 7.7 | Serine/threonine-protein kinase SRPK1                                                                                                                                                                                                           |
| 2561 | Q5TFE4           | 3                    | 4              | 6.8                   | 455    | 51845 | 6.3 | 5'-nucleotidase domain-containing protein 1                                                                                                                                                                                                     |
| 2562 | Q92685           | 3                    | 7              | 6.8                   | 438    | 50126 | 9.4 | Dolichyl-P-Man:Man(5)GlcNAc(2)-PP-dolichyl mannosyltransferase (EC 2.4.1.-) (Dol-P-Man-dependent alpha(1-3)-mannosyltransferase)                                                                                                                |
| 2563 | Q9Y6W5           | 3                    | 7              | 6.8                   | 498    | 54284 | 5.5 | Wiskott-Aldrich syndrome protein family member 2                                                                                                                                                                                                |
| 2564 | UPI000053FD0C    | 3                    | 3              | 7.1                   | 438    | 48733 | 6.1 | argininosuccinate lyase isoform 3                                                                                                                                                                                                               |
| 2564 | UPI0000D61C56    | 3                    | 3              | 7                     | 442    | 49095 | 6.2 | Argininosuccinate lyase (EC 4.3.2.1) (Argininosuccinase) (ASAL).                                                                                                                                                                                |
| 2564 | P04424           | 3                    | 3              | 6.7                   | 464    | 51658 | 6.5 | Argininosuccinate lyase                                                                                                                                                                                                                         |
| 2565 | Q13131           | 3                    | 5              | 6.7                   | 550    | 62808 | 7.6 | 5'-AMP-activated protein kinase catalytic subunit alpha-1                                                                                                                                                                                       |
| 2565 | UPI000020C9F6    | 3                    | 5              | 6.6                   | 559    | 64009 | 8.1 | protein kinase, AMP-activated, alpha 1 catalytic subunit isoform 1                                                                                                                                                                              |
| 2565 | UPI00002263A3    | 3                    | 5              | 6.5                   | 565    | 64322 | 7.7 | 5'-AMP-activated protein kinase catalytic subunit alpha-1 (EC 2.7.11.1) (AMPK alpha-1 chain).                                                                                                                                                   |
| 2565 | UPI00003529FB    | 3                    | 5              | 6.4                   | 574    | 65523 | 8.2 | protein kinase, AMP-activated, alpha 1 catalytic subunit isoform 2                                                                                                                                                                              |

| No.  | Accession Number | Unique Peptide Count | Spectrum Count | Sequence Coverage (%) | Length | MolWt | pI  | Descriptive Name                                                                                                                                                                                                                                                   |
|------|------------------|----------------------|----------------|-----------------------|--------|-------|-----|--------------------------------------------------------------------------------------------------------------------------------------------------------------------------------------------------------------------------------------------------------------------|
| 2565 | Q86VS1           | 3                    | 5              | 6.4                   | 574    | 65505 | 8.2 | Protein kinase, AMP-activated, alpha 1 catalytic subunit                                                                                                                                                                                                           |
| 2566 | Q13188           | 3                    | 5              | 6.7                   | 491    | 56301 | 5.2 | Serine/threonine-protein kinase 3                                                                                                                                                                                                                                  |
| 2566 | UPI00004576D2    | 3                    | 5              | 6.7                   | 491    | 56234 | 5.2 | Serine/threonine-protein kinase 3 (EC 2.7.11.1) (STE20-like kinase MST2) (MST-2) (Mammalian STE20-like protein kinase 2) (Serine/threonine-protein kinase Krs-1).                                                                                                  |
| 2567 | Q9H1B7           | 3                    | 6              | 6.7                   | 796    | 82659 | 8.2 | RING finger protein C14orf4                                                                                                                                                                                                                                        |
| 2568 | P20933           | 3                    | 6              | 6.6                   | 346    | 37194 | 6.3 | N(4)-(beta-N-acetylglucosaminy)-L-asparaginase precursor (EC 3.5.1.26) (Glycosylasparaginase) (Aspartylglucosaminidase) (N4-(N- acetyl-beta-glucosaminy)-L-asparagine amidase) (AGA) [Contains: Glycosylasparaginase alpha chain; Glycosylasparaginase beta chain] |
| 2568 | UPI000013D53C    | 3                    | 6              | 6.6                   | 346    | 37208 | 6.3 | N(4)-(beta-N-acetylglucosaminy)-L-asparaginase precursor (EC 3.5.1.26) (Glycosylasparaginase) (Aspartylglucosaminidase) (N4-(N- acetyl-beta-glucosaminy)-L-asparagine amidase) (AGA) [Contains: Glycosylasparaginase alpha chain; Glycosylasparaginase beta c      |
| 2569 | Q6NUM9-2         | 3                    | 9              | 8.3                   | 481    | 52439 | 8   | Isoform 2 of Q6NUM9                                                                                                                                                                                                                                                |
| 2569 | Q6NUM9           | 3                    | 9              | 6.6                   | 610    | 66820 | 8.3 | All-trans-retinol 13,14-reductase precursor                                                                                                                                                                                                                        |
| 2569 | UPI0000072C67    | 3                    | 9              | 6.6                   | 610    | 66793 | 8.3 | all-trans-13,14-dihydroretinol saturase                                                                                                                                                                                                                            |
| 2570 | Q96GQ5           | 3                    | 3              | 6.6                   | 468    | 51018 | 6.9 | UPF0420 protein C16orf58                                                                                                                                                                                                                                           |
| 2570 | UPI0000072B44    | 3                    | 3              | 6.6                   | 468    | 50960 | 7.2 | hypothetical protein LOC64755                                                                                                                                                                                                                                      |
| 2571 | Q9H900           | 3                    | 9              | 6.6                   | 591    | 67283 | 6.3 | Protein zwilch homolog                                                                                                                                                                                                                                             |
| 2571 | UPI000013EC73    | 3                    | 9              | 6.6                   | 591    | 67214 | 6.3 | Zwilch                                                                                                                                                                                                                                                             |
| 2572 | Q9HA77           | 3                    | 4              | 6.6                   | 564    | 62224 | 8.3 | Probable cysteinyl-tRNA synthetase, mitochondrial precursor                                                                                                                                                                                                        |
| 2573 | Q5T2T8           | 3                    | 4              | 12.7                  | 204    | 22890 | 7.3 | Prion protein interacting protein                                                                                                                                                                                                                                  |
| 2573 | Q5TG35           | 3                    | 4              | 11.7                  | 222    | 25009 | 6.5 | Prion protein interacting protein                                                                                                                                                                                                                                  |
| 2573 | UPI0000D4E859    | 3                    | 4              | 7.1                   | 365    | 40077 | 8   | prion protein interacting protein                                                                                                                                                                                                                                  |
| 2573 | O43414           | 3                    | 4              | 6.5                   | 397    | 43076 | 8.7 | Prion protein-interacting protein                                                                                                                                                                                                                                  |
| 2574 | UPI0000DD7F7B    | 3                    | 4              | 6.5                   | 602    | 66578 | 8.5 | PREDICTED: similar to sorting nexin family member 30 isoform 1                                                                                                                                                                                                     |
| 2575 | Q9BR60           | 3                    | 3              | 11.5                  | 373    | 42522 | 4.7 | OS-9 protein                                                                                                                                                                                                                                                       |
| 2575 | Q13438           | 3                    | 3              | 6.4                   | 667    | 75562 | 4.9 | Protein OS-9 precursor                                                                                                                                                                                                                                             |
| 2576 | Q14746           | 3                    | 4              | 6.4                   | 738    | 83208 | 6.6 | Conserved oligomeric Golgi complex component 2                                                                                                                                                                                                                     |
| 2576 | Q86U99           | 3                    | 4              | 6.4                   | 737    | 83136 | 6.6 | Component of oligomeric golgi complex 2                                                                                                                                                                                                                            |
| 2577 | Q9BRR6-2         | 3                    | 5              | 6.5                   | 496    | 53961 | 6.2 | Isoform 2 of Q9BRR6                                                                                                                                                                                                                                                |
| 2577 | Q9BRR6           | 3                    | 5              | 6.4                   | 497    | 54089 | 6.2 | ADP-dependent glucokinase                                                                                                                                                                                                                                          |
| 2578 | Q13330-2         | 3                    | 5              | 10.5                  | 430    | 49017 | 5.5 | Isoform Short of Q13330                                                                                                                                                                                                                                            |
| 2578 | Q13330           | 3                    | 5              | 6.3                   | 715    | 80788 | 9.3 | Metastasis-associated protein MTA1                                                                                                                                                                                                                                 |
| 2578 | UPI00003669FD    | 3                    | 5              | 6.3                   | 715    | 80786 | 9.3 | metastasis associated protein                                                                                                                                                                                                                                      |
| 2579 | P98170           | 3                    | 3              | 6.2                   | 497    | 56685 | 6.6 | Baculoviral IAP repeat-containing protein 4                                                                                                                                                                                                                        |
| 2580 | Q2TAY7           | 3                    | 4              | 6.2                   | 513    | 57544 | 7.2 | Smu-1 suppressor of mec-8 and unc-52 protein homolog                                                                                                                                                                                                               |
| 2581 | Q93034           | 3                    | 6              | 6.2                   | 780    | 90955 | 8   | Cullin-5                                                                                                                                                                                                                                                           |
| 2582 | Q9UBV2           | 3                    | 3              | 6.2                   | 794    | 88755 | 5.4 | Sel-1 homolog precursor                                                                                                                                                                                                                                            |
| 2583 | Q59F15           | 3                    | 6              | 8.9                   | 461    | 52976 | 7.1 | Protein kinase C, alpha variant                                                                                                                                                                                                                                    |
| 2583 | P17252           | 3                    | 6              | 6.1                   | 672    | 76764 | 7   | Protein kinase C alpha type                                                                                                                                                                                                                                        |
| 2583 | UPI000013DD98    | 3                    | 6              | 6.1                   | 672    | 76750 | 7   | Protein kinase C alpha type (EC 2.7.11.13) (PKC-alpha) (PKC-A).                                                                                                                                                                                                    |
| 2583 | Q2TSD3           | 3                    | 6              | 6.1                   | 672    | 76762 | 7.1 | Aging-associated gene 6 protein                                                                                                                                                                                                                                    |
| 2584 | Q14738-3         | 3                    | 4              | 7.5                   | 496    | 58453 | 6.8 | Isoform Delta                                                                                                                                                                                                                                                      |
| 2584 | Q59EF0           | 3                    | 4              | 7.4                   | 503    | 59336 | 7.4 | Delta isoform of regulatory subunit B56, protein phosphatase 2A isoform 1 variant                                                                                                                                                                                  |
| 2584 | Q14738-2         | 3                    | 4              | 6.5                   | 570    | 66181 | 7.6 | Isoform Delta                                                                                                                                                                                                                                                      |
| 2584 | Q14738           | 3                    | 4              | 6.1                   | 602    | 69992 | 8.1 | Serine/threonine-protein phosphatase 2A 56 kDa regulatory subunit delta isoform                                                                                                                                                                                    |
| 2585 | Q8IY67-2         | 3                    | 5              | 6.1                   | 739    | 77860 | 8.8 | Isoform 2 of Q8IY67                                                                                                                                                                                                                                                |
| 2585 | UPI0000E042A4    | 3                    | 5              | 6                     | 756    | 79579 | 8.9 | RAVER1                                                                                                                                                                                                                                                             |
| 2586 | O43818           | 3                    | 5              | 5.9                   | 475    | 51841 | 7.9 | U3 small nucleolar RNA-interacting protein 2                                                                                                                                                                                                                       |
| 2587 | UPI0000246FF6    | 3                    | 3              | 8.6                   | 417    | 47287 | 6.3 | Serum albumin precursor.                                                                                                                                                                                                                                           |
| 2587 | P02768-2         | 3                    | 3              | 8.6                   | 417    | 47361 | 6.3 | Isoform 2 of P02768                                                                                                                                                                                                                                                |
| 2587 | P02768           | 3                    | 3              | 5.9                   | 609    | 69367 | 6.3 | Serum albumin precursor                                                                                                                                                                                                                                            |
| 2587 | UPI0000D61578    | 3                    | 3              | 5.8                   | 626    | 71576 | 6.7 | Serum albumin precursor.                                                                                                                                                                                                                                           |
| 2588 | P17405           | 3                    | 5              | 5.9                   | 629    | 69851 | 7.4 | Sphingomyelin phosphodiesterase precursor                                                                                                                                                                                                                          |
| 2588 | UPI000013E592    | 3                    | 5              | 5.9                   | 631    | 69936 | 7.3 | sphingomyelin phosphodiesterase 1, acid lysosomal isoform 1 precursor                                                                                                                                                                                              |
| 2588 | UPI0000D625A9    | 3                    | 5              | 5.6                   | 664    | 73082 | 7.5 | Sphingomyelin phosphodiesterase precursor (EC 3.1.4.12) (Acid sphingomyelinase) (aSMase).                                                                                                                                                                          |
| 2588 | Q59EN6           | 3                    | 5              | 5.6                   | 664    | 73054 | 7.5 | Sphingomyelin phosphodiesterase 1, acid lysosomal isoform 1 variant                                                                                                                                                                                                |
| 2589 | Q8IYU3           | 3                    | 3              | 7.6                   | 472    | 52175 | 7.8 | 2'-PDE protein                                                                                                                                                                                                                                                     |
| 2589 | Q8TE78           | 3                    | 3              | 6.7                   | 535    | 58920 | 6.8 | CDNA FLJ23843 fis, clone KAT07393                                                                                                                                                                                                                                  |
| 2589 | Q6L8Q7           | 3                    | 3              | 5.9                   | 609    | 67382 | 6.5 | 2'-phosphodiesterase                                                                                                                                                                                                                                               |
| 2589 | UPI000053E488    | 3                    | 3              | 5.9                   | 609    | 67405 | 6.6 | 2''-phosphodiesterase                                                                                                                                                                                                                                              |
| 2589 | UPI000049DFA7    | 3                    | 3              | 5.9                   | 609    | 67352 | 6.6 | 2'-phosphodiesterase                                                                                                                                                                                                                                               |

| No.  | Accession Number | Unique Peptide Count | Spectrum Count | Sequence Coverage (%) | Length | MolWt  | pI  | Descriptive Name                                                                                                                                                                               |
|------|------------------|----------------------|----------------|-----------------------|--------|--------|-----|------------------------------------------------------------------------------------------------------------------------------------------------------------------------------------------------|
| 2590 | Q9P2B4           | 3                    | 3              | 5.9                   | 639    | 70158  | 8.1 | CTTNBP2 N-terminal-like protein                                                                                                                                                                |
| 2591 | Q9UID3           | 3                    | 4              | 5.9                   | 782    | 86042  | 6.5 | Uncharacterized protein C11orf2                                                                                                                                                                |
| 2592 | UPI00001AE640    | 3                    | 4              | 6.3                   | 568    | 65914  | 9.1 | Zuotin-related factor 1 (M-phase phosphoprotein 11).                                                                                                                                           |
| 2592 | Q99543-2         | 3                    | 4              | 6.3                   | 568    | 65814  | 9   | Isoform 2 of Q99543                                                                                                                                                                            |
| 2592 | Q99543           | 3                    | 4              | 5.8                   | 621    | 71897  | 8.6 | DnaJ homolog subfamily C member 2                                                                                                                                                              |
| 2592 | UPI000020F858    | 3                    | 4              | 5.8                   | 621    | 71996  | 8.7 | zuotin related factor 1                                                                                                                                                                        |
| 2593 | P50281           | 3                    | 3              | 5.7                   | 582    | 65884  | 7.8 | Matrix metalloproteinase-14 precursor                                                                                                                                                          |
| 2593 | UPI0000048136    | 3                    | 3              | 5.7                   | 582    | 65894  | 7.8 | matrix metalloproteinase 14 preproprotein                                                                                                                                                      |
| 2594 | Q8IWH5           | 3                    | 5              | 5.7                   | 574    | 63830  | 8   | Similar to chromosome 1 open reading frame 25                                                                                                                                                  |
| 2594 | UPI0000190FB4    | 3                    | 5              | 4.5                   | 733    | 81790  | 8   | N2,N2-dimethylguanosine tRNA methyltransferase-like                                                                                                                                            |
| 2594 | Q9BZQ1           | 3                    | 5              | 4.5                   | 733    | 81747  | 7.9 | C1orf25                                                                                                                                                                                        |
| 2595 | O15397           | 3                    | 19             | 5.6                   | 1037   | 119974 | 5.2 | Importin-8                                                                                                                                                                                     |
| 2595 | UPI000013CEE9    | 3                    | 19             | 5.6                   | 1037   | 119938 | 5.2 | importin 8                                                                                                                                                                                     |
| 2596 | Q94842           | 3                    | 3              | 5.5                   | 621    | 66195  | 5.1 | Epidermal Langerhans cell protein LCP1                                                                                                                                                         |
| 2597 | P40763           | 3                    | 3              | 5.5                   | 770    | 88068  | 6.3 | Signal transducer and activator of transcription 3                                                                                                                                             |
| 2597 | P40763-2         | 3                    | 3              | 5.5                   | 769    | 87981  | 6.3 | Isoform Del                                                                                                                                                                                    |
| 2598 | P48449           | 3                    | 4              | 5.5                   | 732    | 83309  | 6.6 | Lanosterol synthase                                                                                                                                                                            |
| 2599 | P85037           | 3                    | 8              | 5.5                   | 733    | 75457  | 9.3 | Forkhead box protein K1                                                                                                                                                                        |
| 2600 | Q0ZF97           | 3                    | 5              | 5.5                   | 380    | 42700  | 8   | Cytochrome b                                                                                                                                                                                   |
| 2601 | Q9UI26           | 3                    | 5              | 5.5                   | 975    | 112535 | 5.3 | Importin-11                                                                                                                                                                                    |
| 2601 | UPI00004572F1    | 3                    | 5              | 5.5                   | 974    | 112369 | 5.2 | Importin-11 (Imp11) (Ran-binding protein 11) (RanBP11).                                                                                                                                        |
| 2602 | UPI0000456943    | 3                    | 3              | 5.8                   | 537    | 59662  | 4.8 | Rab GTPase-binding effector protein 2 (Rabaptin-5beta).                                                                                                                                        |
| 2602 | Q9H5N1-2         | 3                    | 3              | 5.8                   | 533    | 59316  | 4.8 | Isoform 2 of Q9H5N1                                                                                                                                                                            |
| 2602 | Q9H5N1           | 3                    | 3              | 5.4                   | 569    | 63543  | 4.8 | Rab GTPase-binding effector protein 2                                                                                                                                                          |
| 2603 | Q9NUQ8           | 3                    | 5              | 5.4                   | 709    | 79745  | 6.3 | ATP-binding cassette sub-family F member 3                                                                                                                                                     |
| 2603 | UPI000004C4CA    | 3                    | 5              | 5.4                   | 709    | 79773  | 6.3 | ATP-binding cassette, sub-family F (GCN20), member 3                                                                                                                                           |
| 2603 | Q9NUQ8-2         | 3                    | 5              | 5.4                   | 703    | 78984  | 6.2 | Isoform 2 of Q9NUQ8                                                                                                                                                                            |
| 2604 | O15484           | 3                    | 3              | 5.3                   | 640    | 73169  | 7.6 | Calpain-5                                                                                                                                                                                      |
| 2604 | UPI0000D62659    | 3                    | 3              | 5                     | 680    | 77293  | 7.4 | Calpain-5 (EC 3.4.22.-) (nCL-3) (htra-3).                                                                                                                                                      |
| 2604 | Q6ZRM8           | 3                    | 3              | 5                     | 680    | 77309  | 7.5 | CDNA FLJ46245 fis, clone TEST14020596, highly similar to Homo sapiens calpain 5                                                                                                                |
| 2604 | Q59GM2           | 3                    | 3              | 5                     | 678    | 76602  | 7.6 | Hypothetical protein                                                                                                                                                                           |
| 2605 | Q5T9B9           | 3                    | 4              | 5.6                   | 625    | 67542  | 6.6 | Endoglin                                                                                                                                                                                       |
| 2605 | P17813           | 3                    | 4              | 5.3                   | 658    | 70578  | 6.6 | Endoglin precursor                                                                                                                                                                             |
| 2606 | Q59GV6           | 3                    | 3              | 5.3                   | 755    | 80589  | 5.4 | Zinedin variant                                                                                                                                                                                |
| 2606 | Q9NRL3           | 3                    | 3              | 5.3                   | 753    | 80582  | 5.4 | Striatin-4                                                                                                                                                                                     |
| 2606 | Q8NE53           | 3                    | 3              | 5.3                   | 753    | 80596  | 5.4 | Striatin, calmodulin binding protein 4                                                                                                                                                         |
| 2607 | UPI0000DD7E96    | 3                    | 5              | 6                     | 753    | 83389  | 6.4 | PREDICTED: similar to Heat repeats-containing protein FLJ20397                                                                                                                                 |
| 2607 | Q86Y56           | 3                    | 5              | 5.3                   | 855    | 93533  | 6.4 | HEAT repeat-containing protein 2                                                                                                                                                               |
| 2607 | UPI0000D61BE2    | 3                    | 5              | 5.3                   | 855    | 93521  | 6.4 | HEAT repeat-containing protein 2.                                                                                                                                                              |
| 2607 | UPI000000DBC0    | 3                    | 5              | 5.3                   | 855    | 93579  | 6.4 | HEAT repeat containing 2                                                                                                                                                                       |
| 2608 | Q8IWA4           | 3                    | 5              | 5.3                   | 741    | 84159  | 6.3 | Mitofusin-1                                                                                                                                                                                    |
| 2608 | UPI000013D495    | 3                    | 5              | 5.3                   | 741    | 84100  | 6.3 | Mitofusin-1 (EC 3.6.5.-) (Transmembrane GTPase MFN1) (Fzo homolog).                                                                                                                            |
| 2609 | Q96PZ0           | 3                    | 3              | 5.3                   | 661    | 75035  | 6.4 | Pseudouridylyl synthase 7 homolog                                                                                                                                                              |
| 2610 | Q9UH65           | 3                    | 7              | 5.3                   | 585    | 68998  | 5.9 | Switch-associated protein 70                                                                                                                                                                   |
| 2611 | Q6NUL5           | 3                    | 3              | 5.5                   | 823    | 90776  | 6.5 | COG5 protein                                                                                                                                                                                   |
| 2611 | A4D0R6           | 3                    | 3              | 5.2                   | 860    | 94901  | 6.6 | Component of oligomeric golgi complex 5                                                                                                                                                        |
| 2612 | Q8WUY5           | 3                    | 4              | 5.5                   | 759    | 86857  | 6.3 | TSR1 protein                                                                                                                                                                                   |
| 2612 | Q2NL82           | 3                    | 4              | 5.2                   | 804    | 91810  | 7.4 | TSR1, 20S rRNA accumulation, homolog                                                                                                                                                           |
| 2612 | Q9P2E6           | 3                    | 4              | 4.9                   | 853    | 97049  | 8   | Pre-rRNA-processing protein TSR1 homolog                                                                                                                                                       |
| 2613 | Q5T2E6           | 3                    | 3              | 5.2                   | 689    | 78710  | 6.6 | Uncharacterized protein C10orf76                                                                                                                                                               |
| 2614 | Q96KG9-5         | 3                    | 3              | 6.7                   | 626    | 69238  | 8.7 | Isoform 5 of Q96KG9                                                                                                                                                                            |
| 2614 | Q96KG9-3         | 3                    | 3              | 5.9                   | 707    | 78696  | 8.4 | Isoform 3 of Q96KG9                                                                                                                                                                            |
| 2614 | UPI0000D62632    | 3                    | 3              | 5.4                   | 783    | 85686  | 8   | N-terminal kinase-like protein (SCY1-like protein 1) (Teratoma-associated tyrosine kinase) (Telomerase transcriptional element-interacting factor) (Telomerase regulation-associated protein). |
| 2614 | Q96KG9-4         | 3                    | 3              | 5.4                   | 781    | 86312  | 6.6 | Isoform 4 of Q96KG9                                                                                                                                                                            |
| 2614 | Q96KG9-6         | 3                    | 3              | 5.3                   | 787    | 86371  | 8.7 | Isoform 6 of Q96KG9                                                                                                                                                                            |
| 2614 | Q96KG9-2         | 3                    | 3              | 5.3                   | 791    | 88089  | 6.3 | Isoform 2 of Q96KG9                                                                                                                                                                            |
| 2614 | Q96KG9           | 3                    | 3              | 5.2                   | 808    | 89631  | 6.3 | N-terminal kinase-like protein                                                                                                                                                                 |
| 2615 | Q9NQZ2           | 3                    | 5              | 5.2                   | 479    | 54558  | 5.6 | Something about silencing protein 10                                                                                                                                                           |
| 2616 | Q9Y5J1           | 3                    | 5              | 5.2                   | 556    | 62004  | 8.8 | U3 small nucleolar RNA-associated protein 18 homolog                                                                                                                                           |
| 2617 | O96005           | 3                    | 12             | 5.1                   | 669    | 76097  | 6.3 | Cleft lip and palate transmembrane protein 1                                                                                                                                                   |
| 2617 | O96005-2         | 3                    | 12             | 5                     | 686    | 77959  | 6.3 | Isoform 2 of O96005                                                                                                                                                                            |
| 2618 | P57737           | 3                    | 5              | 5.1                   | 925    | 100575 | 5.8 | Coronin-7                                                                                                                                                                                      |
| 2618 | UPI00006AB831    | 3                    | 5              | 5.1                   | 925    | 100635 | 5.8 | coronin 7                                                                                                                                                                                      |
| 2618 | Q17RK4           | 3                    | 5              | 5.1                   | 925    | 100605 | 5.8 | Coronin 7                                                                                                                                                                                      |
| 2619 | Q7L5N7           | 3                    | 11             | 5.1                   | 544    | 60208  | 6.6 | Acyltransferase-like 1                                                                                                                                                                         |
| 2620 | Q969X6-2         | 3                    | 7              | 6.1                   | 571    | 64119  | 8.7 | Isoform 2 of Q969X6                                                                                                                                                                            |
| 2620 | Q969X6           | 3                    | 7              | 5.1                   | 686    | 76890  | 8.8 | Cirhin                                                                                                                                                                                         |
| 2620 | UPI000006E989    | 3                    | 7              | 5.1                   | 686    | 76922  | 8.8 | cirhin                                                                                                                                                                                         |

| No.  | Accession Number | Unique Peptide Count | Spectrum Count | Sequence Coverage (%) | Length | MolWt  | pI  | Descriptive Name                                                                                                                                                                               |
|------|------------------|----------------------|----------------|-----------------------|--------|--------|-----|------------------------------------------------------------------------------------------------------------------------------------------------------------------------------------------------|
| 2621 | P22059           | 3                    | 3              | 5                     | 807    | 89421  | 7.3 | Oxysterol-binding protein 1                                                                                                                                                                    |
| 2622 | Q00653           | 3                    | 4              | 5                     | 900    | 96749  | 6.2 | Nuclear factor NF-kappa-B p100 subunit (DNA-binding factor KBF2) (H2TF1) (Lymphocyte translocation chromosome 10) (Oncogene Lyt-10) (Lyt10) [Contains: Nuclear factor NF-kappa-B p52 subunit]  |
| 2622 | UPI000012DC55    | 3                    | 4              | 5                     | 899    | 96678  | 6.2 | nuclear factor of kappa light polypeptide gene enhancer in B-cells 2 isoform b                                                                                                                 |
| 2622 | UPI00004563FB    | 3                    | 4              | 4.8                   | 930    | 100358 | 6.6 | Nuclear factor NF-kappa-B p100 subunit (DNA-binding factor KBF2) (H2TF1) (Lymphocyte translocation chromosome 10) (Oncogene Lyt-10) (Lyt10) [Contains: Nuclear factor NF-kappa-B p52 subunit]. |
| 2623 | Q5TEK9           | 3                    | 4              | 5                     | 862    | 98676  | 6.3 | Itchy homolog E3 ubiquitin protein ligase                                                                                                                                                      |
| 2623 | UPI0000D6106F    | 3                    | 4              | 5                     | 862    | 98702  | 6.3 | E3 ubiquitin-protein ligase Itchy homolog (EC 6.3.2.-) (Itch) (Atrophin-1-interacting protein 4) (AIP4) (NFE2-associated polypeptide 1) (NAPP1).                                               |
| 2623 | UPI0000456F80    | 3                    | 4              | 4.8                   | 903    | 102829 | 6.3 | E3 ubiquitin-protein ligase Itchy homolog (EC 6.3.2.-) (Itch) (Atrophin-1-interacting protein 4) (AIP4) (NFE2-associated polypeptide 1) (NAPP1).                                               |
| 2623 | Q96J02           | 3                    | 4              | 4.8                   | 903    | 102803 | 6.3 | E3 ubiquitin-protein ligase Itchy homolog                                                                                                                                                      |
| 2624 | Q9BUG9           | 3                    | 6              | 8.7                   | 439    | 48419  | 6.2 | ITGB8 protein                                                                                                                                                                                  |
| 2624 | P26012           | 3                    | 6              | 4.9                   | 769    | 85632  | 7.2 | Integrin beta-8 precursor                                                                                                                                                                      |
| 2625 | UPI0000D6224C    | 3                    | 3              | 7.9                   | 471    | 52566  | 6.5 | ARF GTPase-activating protein GIT2 (G protein-coupled receptor kinase- interactor 2) (GRK-interacting protein 2) (Cool-interacting tyrosine-phosphorylated protein 2) (CAT2) (CAT-2).          |
| 2625 | UPI0000161FB2    | 3                    | 3              | 7.9                   | 471    | 52609  | 6.6 | G protein-coupled receptor kinase-interactor 2 isoform 4                                                                                                                                       |
| 2625 | Q6FI58           | 3                    | 3              | 7.9                   | 471    | 52577  | 6.6 | GIT2 protein                                                                                                                                                                                   |
| 2625 | Q14161-11        | 3                    | 3              | 5.9                   | 631    | 70183  | 6.6 | Isoform 11 of Q14161                                                                                                                                                                           |
| 2625 | UPI0000D6224B    | 3                    | 3              | 5.7                   | 646    | 71956  | 6.6 | ARF GTPase-activating protein GIT2 (G protein-coupled receptor kinase- interactor 2) (GRK-interacting protein 2) (Cool-interacting tyrosine-phosphorylated protein 2) (CAT2) (CAT-2).          |
| 2625 | Q14161-7         | 3                    | 3              | 5.7                   | 646    | 71967  | 6.7 | Isoform 7 of Q14161                                                                                                                                                                            |
| 2625 | UPI0000D6224A    | 3                    | 3              | 5.6                   | 661    | 73392  | 6.7 | ARF GTPase-activating protein GIT2 (G protein-coupled receptor kinase- interactor 2) (GRK-interacting protein 2) (Cool-interacting tyrosine-phosphorylated protein 2) (CAT2) (CAT-2).          |
| 2625 | Q14161-6         | 3                    | 3              | 5.6                   | 661    | 73403  | 6.7 | Isoform 6 of Q14161                                                                                                                                                                            |
| 2625 | UPI0000D62249    | 3                    | 3              | 5.4                   | 681    | 76061  | 7.3 | ARF GTPase-activating protein GIT2 (G protein-coupled receptor kinase- interactor 2) (GRK-interacting protein 2) (Cool-interacting tyrosine-phosphorylated protein 2) (CAT2) (CAT-2).          |
| 2625 | UPI0000167B56    | 3                    | 3              | 5.4                   | 679    | 75734  | 7.2 | G protein-coupled receptor kinase-interactor 2 isoform 3                                                                                                                                       |
| 2625 | Q14161-10        | 3                    | 3              | 5.4                   | 681    | 76072  | 7.5 | Isoform 10 of Q14161                                                                                                                                                                           |
| 2625 | Q14161-8         | 3                    | 3              | 5.3                   | 694    | 77518  | 7.3 | Isoform 8 of Q14161                                                                                                                                                                            |
| 2625 | UPI0000D62248    | 3                    | 3              | 5.2                   | 709    | 78943  | 7.3 | ARF GTPase-activating protein GIT2 (G protein-coupled receptor kinase- interactor 2) (GRK-interacting protein 2) (Cool-interacting tyrosine-phosphorylated protein 2) (CAT2) (CAT-2).          |
| 2625 | Q14161-4         | 3                    | 3              | 5.2                   | 709    | 78954  | 7.5 | Isoform 4 of Q14161                                                                                                                                                                            |
| 2625 | UPI0000D62247    | 3                    | 3              | 5.1                   | 729    | 81311  | 6.9 | ARF GTPase-activating protein GIT2 (G protein-coupled receptor kinase- interactor 2) (GRK-interacting protein 2) (Cool-interacting tyrosine-phosphorylated protein 2) (CAT2) (CAT-2).          |
| 2625 | Q14161-5         | 3                    | 3              | 5.1                   | 729    | 81322  | 7   | Isoform 5 of Q14161                                                                                                                                                                            |
| 2625 | Q14161-3         | 3                    | 3              | 5                     | 744    | 82759  | 7.1 | Isoform 3 of Q14161                                                                                                                                                                            |
| 2625 | Q14161           | 3                    | 3              | 4.9                   | 759    | 84543  | 7.2 | ARF GTPase-activating protein GIT2                                                                                                                                                             |
| 2625 | UPI0000D62246    | 3                    | 3              | 4.9                   | 759    | 84532  | 7.1 | ARF GTPase-activating protein GIT2 (G protein-coupled receptor kinase- interactor 2) (GRK-interacting protein 2) (Cool-interacting tyrosine-phosphorylated protein 2) (CAT2) (CAT-2).          |
| 2626 | P43121           | 3                    | 4              | 4.8                   | 646    | 71608  | 5.8 | Cell surface glycoprotein MUC18 precursor                                                                                                                                                      |
| 2627 | P52735           | 3                    | 4              | 4.8                   | 878    | 101257 | 7.1 | Protein vav-2                                                                                                                                                                                  |
| 2627 | Q5T1S1           | 3                    | 4              | 4.8                   | 878    | 101289 | 7.1 | Vav 2 oncogene                                                                                                                                                                                 |
| 2628 | Q15057           | 3                    | 3              | 4.8                   | 778    | 88029  | 6.8 | Centaurin-beta 2                                                                                                                                                                               |
| 2628 | UPI00002132C7    | 3                    | 3              | 4.8                   | 778    | 88101  | 6.7 | centaurin, beta 2                                                                                                                                                                              |
| 2629 | Q92544           | 3                    | 10             | 4.8                   | 625    | 72541  | 6.7 | Transmembrane 9 superfamily protein member 4                                                                                                                                                   |
| 2630 | Q6ULP2-3         | 3                    | 3              | 5.2                   | 820    | 89720  | 4.5 | Isoform 3 of Q6ULP2                                                                                                                                                                            |
| 2630 | Q53GW0           | 3                    | 3              | 4.7                   | 909    | 99488  | 4.6 | Aftiphilin protein isoform b variant                                                                                                                                                           |
| 2630 | Q6ULP2-5         | 3                    | 3              | 4.7                   | 908    | 99371  | 4.6 | Isoform 5 of Q6ULP2                                                                                                                                                                            |
| 2630 | Q6ULP2-2         | 3                    | 3              | 4.7                   | 909    | 99458  | 4.6 | Isoform 2 of Q6ULP2                                                                                                                                                                            |
| 2630 | Q6ULP2-4         | 3                    | 3              | 4.6                   | 936    | 102113 | 4.5 | Isoform 4 of Q6ULP2                                                                                                                                                                            |
| 2630 | Q6ULP2           | 3                    | 3              | 4.6                   | 937    | 102200 | 4.5 | Aftiphilin                                                                                                                                                                                     |
| 2631 | Q63ZY3-3         | 3                    | 3              | 4.8                   | 841    | 90044  | 6   | Isoform 3 of Q63ZY3                                                                                                                                                                            |
| 2631 | Q63ZY3           | 3                    | 3              | 4.7                   | 851    | 91174  | 5.6 | Ankyrin repeat domain-containing protein 25                                                                                                                                                    |

| No.  | Accession Number | Unique Peptide Count | Spectrum Count | Sequence Coverage (%) | Length | MolWt  | pI   | Descriptive Name                                                                                                                                                                               |
|------|------------------|----------------------|----------------|-----------------------|--------|--------|------|------------------------------------------------------------------------------------------------------------------------------------------------------------------------------------------------|
| 2632 | Q9NXF1           | 3                    | 8              | 4.7                   | 929    | 105674 | 9.4  | Testis-expressed sequence 10 protein                                                                                                                                                           |
| 2632 | UPI0000071D99    | 3                    | 8              | 4.7                   | 929    | 105693 | 9.4  | testis expressed sequence 10                                                                                                                                                                   |
| 2633 | UPI000015D937    | 3                    | 5              | 4.7                   | 620    | 71320  | 6.5  | protein arginine methyltransferase 5 isoform b                                                                                                                                                 |
| 2633 | O14744           | 3                    | 5              | 4.6                   | 637    | 72684  | 6.3  | Protein arginine N-methyltransferase 5                                                                                                                                                         |
| 2634 | P48960-2         | 3                    | 7              | 5.1                   | 742    | 81743  | 7.1  | Isoform 2 of P48960                                                                                                                                                                            |
| 2634 | P48960-3         | 3                    | 7              | 4.8                   | 786    | 86628  | 6.9  | Isoform 3 of P48960                                                                                                                                                                            |
| 2634 | P48960           | 3                    | 7              | 4.6                   | 835    | 91869  | 6.9  | CD97 antigen precursor                                                                                                                                                                         |
| 2635 | P19838           | 3                    | 3              | 4.5                   | 968    | 105356 | 5.4  | Nuclear factor NF-kappa-B p105 subunit (DNA-binding factor KBF1) (EBP- 1) [Contains: Nuclear factor NF-kappa-B p50 subunit]                                                                    |
| 2635 | P19838-2         | 3                    | 3              | 4.5                   | 969    | 105427 | 5.4  | Isoform 2 of P19838                                                                                                                                                                            |
| 2636 | P22033           | 3                    | 5              | 4.5                   | 750    | 83120  | 6.9  | Methylmalonyl-CoA mutase, mitochondrial precursor                                                                                                                                              |
| 2636 | UPI000013DA28    | 3                    | 5              | 4.5                   | 750    | 83135  | 6.9  | Methylmalonyl-CoA mutase, mitochondrial precursor (EC 5.4.99.2) (MCM) (Methylmalonyl-CoA isomerase).                                                                                           |
| 2636 | UPI000004981E    | 3                    | 5              | 4.5                   | 750    | 83101  | 6.8  | methylmalonyl Coenzyme A mutase precursor                                                                                                                                                      |
| 2637 | Q96EK5           | 3                    | 3              | 4.5                   | 621    | 71814  | 5.5  | Uncharacterized protein KIAA1279                                                                                                                                                               |
| 2638 | Q9Y6D9           | 3                    | 3              | 4.9                   | 718    | 83067  | 5.9  | Mitotic spindle assembly checkpoint protein MAD1                                                                                                                                               |
| 2638 | A4D218           | 3                    | 3              | 4.4                   | 803    | 91721  | 8.1  | MAD1 mitotic arrest deficient-like 1                                                                                                                                                           |
| 2638 | UPI0000140415    | 3                    | 3              | 4.4                   | 803    | 91771  | 8.1  | Mitotic spindle assembly checkpoint protein MAD1 (Mitotic arrest deficient-like protein 1) (MAD1-like 1) (Mitotic checkpoint MAD1 protein-homolog) (HsMAD1) (hMAD1) (Tax-binding protein 181). |
| 2638 | Q9Y6D9-2         | 3                    | 3              | 4.4                   | 804    | 91859  | 8.1  | Isoform 2 of Q9Y6D9                                                                                                                                                                            |
| 2639 | Q5VXS9           | 3                    | 3              | 5.2                   | 907    | 102289 | 6.2  | Hect domain and RLD 4                                                                                                                                                                          |
| 2639 | Q5GLZ8-6         | 3                    | 3              | 5                     | 947    | 106715 | 6.5  | Isoform 6 of Q5GLZ8                                                                                                                                                                            |
| 2639 | Q5GLZ8-3         | 3                    | 3              | 4.8                   | 979    | 109585 | 6.5  | Isoform 3 of Q5GLZ8                                                                                                                                                                            |
| 2639 | Q5GLZ8-2         | 3                    | 3              | 4.5                   | 1049   | 117697 | 6.3  | Isoform 2 of Q5GLZ8                                                                                                                                                                            |
| 2639 | Q5GLZ8           | 3                    | 3              | 4.4                   | 1057   | 118563 | 6.2  | Probable E3 ubiquitin-protein ligase HERC4                                                                                                                                                     |
| 2640 | P10253           | 3                    | 7              | 4.3                   | 952    | 105338 | 6    | Lysosomal alpha-glucosidase precursor (EC 3.2.1.20) (Acid maltase) (Aglucosidase alfa) [Contains: 76 kDa lysosomal alpha-glucosidase; 70 kDa lysosomal alpha-glucosidase]                      |
| 2641 | Q9BTT9           | 3                    | 4              | 4.8                   | 673    | 76483  | 6.5  | GYS1 protein                                                                                                                                                                                   |
| 2641 | P13807           | 3                    | 4              | 4.3                   | 737    | 83786  | 6.2  | Glycogen [starch] synthase, muscle                                                                                                                                                             |
| 2641 | Q53ER0           | 3                    | 4              | 4.3                   | 737    | 83858  | 6.1  | Glycogen synthase 1 (Muscle) variant                                                                                                                                                           |
| 2642 | O60231           | 3                    | 6              | 4.2                   | 1041   | 119263 | 6.8  | Putative pre-mRNA-splicing factor ATP-dependent RNA helicase DHX16                                                                                                                             |
| 2642 | UPI0000161FB0    | 3                    | 6              | 4.2                   | 1041   | 119172 | 6.7  | DEAH (Asp-Glu-Ala-His) box polypeptide 16                                                                                                                                                      |
| 2643 | Q9H911           | 3                    | 4              | 4.8                   | 852    | 98441  | 6.4  | CDNA FLJ13089 fis, clone NT2RP3002108, weakly similar to DEC1 PROTEIN                                                                                                                          |
| 2643 | Q14CX7           | 3                    | 4              | 4.2                   | 972    | 112292 | 6.6  | Uncharacterized protein C12orf30                                                                                                                                                               |
| 2643 | Q7Z4N6           | 3                    | 4              | 4.2                   | 972    | 112277 | 6.6  | P120                                                                                                                                                                                           |
| 2644 | Q9UDY8-2         | 3                    | 7              | 4.3                   | 813    | 91081  | 5.9  | Isoform 2 of Q9UDY8                                                                                                                                                                            |
| 2644 | Q9UDY8           | 3                    | 7              | 4.2                   | 824    | 92272  | 5.7  | Mucosa-associated lymphoid tissue lymphoma translocation protein 1                                                                                                                             |
| 2645 | O75152           | 3                    | 4              | 4.1                   | 810    | 89131  | 8.4  | Zinc finger CCCH domain-containing protein 11A                                                                                                                                                 |
| 2645 | UPI0000D62084    | 3                    | 4              | 4.1                   | 812    | 89346  | 8.4  | Zinc finger CCCH domain-containing protein 11A.                                                                                                                                                |
| 2646 | Q8TD16           | 3                    | 4              | 4.1                   | 824    | 93533  | 5.4  | Protein bicaudal D homolog 2                                                                                                                                                                   |
| 2646 | Q8TD16-2         | 3                    | 4              | 4                     | 855    | 96806  | 5.4  | Isoform 2 of Q8TD16                                                                                                                                                                            |
| 2647 | Q7Z513           | 3                    | 3              | 5.3                   | 509    | 57954  | 6.6  | Kinesin heavy chain member 2                                                                                                                                                                   |
| 2647 | O00139           | 3                    | 3              | 4                     | 679    | 76955  | 6.4  | Kinesin-like protein KIF2A                                                                                                                                                                     |
| 2647 | UPI000012DE53    | 3                    | 3              | 4                     | 679    | 76927  | 6.4  | kinesin heavy chain member 2                                                                                                                                                                   |
| 2647 | UPI0000414107    | 3                    | 3              | 3.9                   | 686    | 77749  | 6.6  | Kinesin-like protein KIF2A (Kinesin-2) (HK2).                                                                                                                                                  |
| 2648 | P30260           | 3                    | 3              | 4                     | 824    | 91867  | 7    | Cell division cycle protein 27 homolog                                                                                                                                                         |
| 2649 | Q59G44           | 3                    | 6              | 5.9                   | 627    | 68685  | 8.1  | Calcium-transporting ATPase 2C1 isoform 1d variant                                                                                                                                             |
| 2649 | P98194-2         | 3                    | 6              | 4.2                   | 888    | 96960  | 6.3  | Isoform 2 of P98194                                                                                                                                                                            |
| 2649 | P98194-4         | 3                    | 6              | 4.1                   | 903    | 98733  | 6.6  | Isoform 4 of P98194                                                                                                                                                                            |
| 2649 | P98194           | 3                    | 6              | 4                     | 919    | 100577 | 6.7  | Calcium-transporting ATPase type 2C member 1 (EC 3.6.3.8) (ATPase 2C1) (ATP-dependent Ca(2+) pump PMR1)                                                                                        |
| 2649 | P98194-3         | 3                    | 6              | 4                     | 923    | 101163 | 6.4  | Isoform 3 of P98194                                                                                                                                                                            |
| 2649 | UPI0000D61B7A    | 3                    | 6              | 3.9                   | 960    | 105298 | 6.1  | Calcium-transporting ATPase type 2C member 1 (EC 3.6.3.8) (ATPase 2C1) (ATP-dependent Ca(2+) pump PMR1).                                                                                       |
| 2649 | UPI00001969A3    | 3                    | 6              | 3.9                   | 949    | 104032 | 6.4  | calcium-transporting ATPase 2C1 isoform 1d                                                                                                                                                     |
| 2649 | P98194-6         | 3                    | 6              | 3.9                   | 959    | 105057 | 6.3  | Isoform 6 of P98194                                                                                                                                                                            |
| 2649 | P98194-5         | 3                    | 6              | 3.9                   | 939    | 103007 | 6.5  | Isoform 5 of P98194                                                                                                                                                                            |
| 2650 | Q61624           | 3                    | 3              | 4                     | 794    | 88751  | 6.5  | Zinc finger protein 148                                                                                                                                                                        |
| 2650 | UPI0000163B55    | 3                    | 3              | 4                     | 794    | 88992  | 6.5  | zinc finger protein 148 (pHZ-52)                                                                                                                                                               |
| 2650 | Q9UQR1           | 3                    | 3              | 4                     | 794    | 88976  | 6.5  | Zinc finger protein 148                                                                                                                                                                        |
| 2650 | Q8TDH4           | 3                    | 3              | 4                     | 794    | 88988  | 6.5  | CLL-associated antigen KW-10                                                                                                                                                                   |
| 2651 | Q6NX51           | 3                    | 7              | 4                     | 974    | 110498 | 6.5  | Exocyst complex component 4                                                                                                                                                                    |
| 2651 | Q96A65           | 3                    | 7              | 4                     | 974    | 110498 | 6.5  | Exocyst complex component 4                                                                                                                                                                    |
| 2652 | Q96T37-2         | 3                    | 4              | 4                     | 957    | 104755 | 10.1 | Isoform 2 of Q96T37                                                                                                                                                                            |
| 2652 | Q86VW9           | 3                    | 4              | 4                     | 959    | 105284 | 10.1 | RBM15 protein                                                                                                                                                                                  |
| 2652 | Q3ZB86           | 3                    | 4              | 3.9                   | 969    | 106365 | 10.1 | RBM15 protein                                                                                                                                                                                  |
| 2652 | Q96T37           | 3                    | 4              | 3.9                   | 977    | 107188 | 10.1 | Putative RNA-binding protein 15                                                                                                                                                                |



| No.  | Accession Number | Unique Peptide Count | Spectrum Count | Sequence Coverage (%) | Length | MolWt  | pI   | Descriptive Name                                                                                                                                                                                            |
|------|------------------|----------------------|----------------|-----------------------|--------|--------|------|-------------------------------------------------------------------------------------------------------------------------------------------------------------------------------------------------------------|
| 2652 | Q4V760           | 3                    | 4              | 3.9                   | 969    | 106366 | 10.1 | RBM15 protein                                                                                                                                                                                               |
| 2653 | Q5T377           | 3                    | 5              | 3.9                   | 1039   | 115458 | 8.9  | Novel protein                                                                                                                                                                                               |
| 2654 | Q68E01           | 3                    | 6              | 3.9                   | 1043   | 118070 | 5.8  | Integrator complex subunit 3                                                                                                                                                                                |
| 2654 | Q68E01-2         | 3                    | 6              | 3.9                   | 1042   | 118013 | 5.8  | Isoform 2 of Q68E01                                                                                                                                                                                         |
| 2655 | UPI000049DE88    | 3                    | 6              | 3.8                   | 1104   | 124019 | 5.9  | KIAA1468 (KIAA1468), mRNA                                                                                                                                                                                   |
| 2656 | Q6P275           | 3                    | 8              | 3.8                   | 1221   | 140090 | 5.5  | STAG1 protein                                                                                                                                                                                               |
| 2656 | Q4LE48           | 3                    | 8              | 3.7                   | 1275   | 146338 | 5.7  | STAG1 variant protein                                                                                                                                                                                       |
| 2656 | UPI000020A2DE    | 3                    | 8              | 3.7                   | 1258   | 144427 | 5.6  | stromal antigen 1                                                                                                                                                                                           |
| 2656 | Q8WVM7           | 3                    | 8              | 3.7                   | 1258   | 144445 | 5.6  | Cohesin subunit SA-1                                                                                                                                                                                        |
| 2657 | UPI00001C1F5D    | 3                    | 5              | 3.9                   | 1142   | 125822 | 7.1  | fibronectin type III domain containing 3A isoform 2                                                                                                                                                         |
| 2657 | Q9Y2H6           | 3                    | 5              | 3.9                   | 1134   | 125054 | 7.1  | Fibronectin type-III domain-containing protein 3a                                                                                                                                                           |
| 2657 | Q6EVH4           | 3                    | 5              | 3.7                   | 1198   | 131852 | 6.7  | Gene expressed in odontoblast protein                                                                                                                                                                       |
| 2658 | Q92620           | 3                    | 6              | 3.7                   | 1227   | 140502 | 6.5  | Pre-mRNA-splicing factor ATP-dependent RNA helicase PRP16                                                                                                                                                   |
| 2659 | P49916-2         | 3                    | 4              | 3.8                   | 862    | 95802  | 9    | Isoform Beta of P49916                                                                                                                                                                                      |
| 2659 | P49916           | 3                    | 4              | 3.6                   | 922    | 102691 | 8.8  | DNA ligase 3                                                                                                                                                                                                |
| 2660 | UPI0000456EF2    | 3                    | 7              | 3.9                   | 764    | 85458  | 8.5  | Mitochondrial ATP-binding cassette sub-family B member 6 (Mitochondrial ABC transporter 3) (Mt-ABC transporter 3) (Ubiquitously expressed mammalian ABC half transporter) (P-glycoprotein-related protein). |
| 2660 | Q9NP58-4         | 3                    | 7              | 3.9                   | 766    | 85685  | 8.5  | Isoform 4 of Q9NP58                                                                                                                                                                                         |
| 2660 | Q9NP58           | 3                    | 7              | 3.6                   | 842    | 93886  | 8.5  | Mitochondrial ATP-binding cassette sub-family B member 6                                                                                                                                                    |
| 2661 | Q9Y6D5           | 3                    | 4              | 3.6                   | 1785   | 202037 | 6.3  | Brefeldin A-inhibited guanine nucleotide-exchange protein 2                                                                                                                                                 |
| 2661 | UPI000012693A    | 3                    | 4              | 3.6                   | 1785   | 202092 | 6.5  | ADP-ribosylation factor guanine nucleotide-exchange factor 2                                                                                                                                                |
| 2662 | Q5JSH3           | 3                    | 3              | 3.5                   | 913    | 101366 | 5.5  | WD repeat protein 44                                                                                                                                                                                        |
| 2662 | Q5JSH3-2         | 3                    | 3              | 3.5                   | 905    | 100403 | 5.5  | Isoform 2 of Q5JSH3                                                                                                                                                                                         |
| 2663 | Q6P2E9           | 3                    | 4              | 3.5                   | 1401   | 151661 | 5.9  | Enhancer of mRNA-decapping protein 4                                                                                                                                                                        |
| 2664 | Q9H4L7           | 3                    | 4              | 3.5                   | 1026   | 117374 | 5.6  | SWI/SNF-related matrix-associated actin-dependent regulator of chromatin subfamily A containing DEAD/H box 1                                                                                                |
| 2664 | UPI000020B1CF    | 3                    | 4              | 3.5                   | 1028   | 117602 | 5.6  | SWI/SNF-related matrix-associated actin-dependent regulator of chromatin subfamily A containing DEAD/H box 1 (EC 3.6.1.-) (ATP- dependent helicase 1) (hHEL1).                                              |
| 2664 | UPI000013E22F    | 3                    | 4              | 3.5                   | 1026   | 117402 | 5.6  | SWI/SNF-related matrix-associated actin-dependent regulator of chromatin subfamily A containing DEAD/H box 1 (EC 3.6.1.-) (ATP- dependent helicase 1) (hHEL1).                                              |
| 2664 | Q9H4L7-2         | 3                    | 4              | 3.5                   | 1028   | 117574 | 5.6  | Isoform 2 of Q9H4L7                                                                                                                                                                                         |
| 2665 | Q9UIA9           | 3                    | 17             | 3.5                   | 1087   | 123907 | 6.3  | Exportin-7                                                                                                                                                                                                  |
| 2665 | UPI000049E0B7    | 3                    | 17             | 3.5                   | 1087   | 123975 | 6.3  | Exportin-7 (Exp7) (Ran-binding protein 16).                                                                                                                                                                 |
| 2665 | UPI0000073676    | 3                    | 17             | 3.5                   | 1087   | 123953 | 6.3  | exportin 7                                                                                                                                                                                                  |
| 2666 | O76024           | 3                    | 3              | 3.4                   | 890    | 100305 | 8    | Wolframin                                                                                                                                                                                                   |
| 2666 | UPI00000715C3    | 3                    | 3              | 3.4                   | 890    | 100291 | 8    | Wolframin.                                                                                                                                                                                                  |
| 2667 | Q504U8           | 3                    | 5              | 3.8                   | 1091   | 120692 | 6.8  | EGFR protein                                                                                                                                                                                                |
| 2667 | P00533           | 3                    | 5              | 3.4                   | 1210   | 134277 | 6.7  | Epidermal growth factor receptor precursor                                                                                                                                                                  |
| 2667 | Q2TTR7           | 3                    | 5              | 3.4                   | 1210   | 134323 | 6.7  | Cell growth inhibiting protein 40                                                                                                                                                                           |
| 2668 | Q13136-2         | 3                    | 3              | 3.5                   | 1185   | 133970 | 6.3  | Isoform 2 of Q13136                                                                                                                                                                                         |
| 2668 | Q13136           | 3                    | 3              | 3.4                   | 1202   | 135778 | 6.3  | Liprin-alpha-1                                                                                                                                                                                              |
| 2668 | UPI000013CE04    | 3                    | 3              | 3.4                   | 1206   | 136121 | 6.3  | Liprin-alpha-1 (Protein tyrosine phosphatase receptor type f polypeptide-interacting protein alpha-1) (PTPRF-interacting protein alpha-1) (LAR-interacting protein 1) (LIP.1).                              |
| 2669 | Q9Y5Q9           | 3                    | 6              | 3.4                   | 886    | 101272 | 5.1  | General transcription factor 3C polypeptide 3                                                                                                                                                               |
| 2670 | UPI0000161590    | 3                    | 3              | 3.4                   | 1011   | 111723 | 6.8  | CAP-GLY domain containing linker protein 2 isoform 2                                                                                                                                                        |
| 2671 | Q8NC75           | 3                    | 3              | 6                     | 613    | 69848  | 8.8  | CDNA FLJ90437 fis, clone NT2RP3000838, weakly similar to TRICHOHYALIN                                                                                                                                       |
| 2671 | Q96D60           | 3                    | 3              | 5.4                   | 691    | 77897  | 7    | PHLDB1 protein                                                                                                                                                                                              |
| 2671 | UPI0000D62692    | 3                    | 3              | 5.1                   | 730    | 82831  | 7    | Pleckstrin homology-like domain family B member 1 (Protein LL5-alpha).                                                                                                                                      |
| 2671 | Q6ZUD6           | 3                    | 3              | 5.1                   | 731    | 82988  | 6.9  | CDNA FLJ43795 fis, clone TEST14000079                                                                                                                                                                       |
| 2671 | Q86UU1-3         | 3                    | 3              | 3.7                   | 995    | 107381 | 8.5  | Isoform 3 of Q86UU1                                                                                                                                                                                         |
| 2671 | Q5W9G0           | 3                    | 3              | 3.3                   | 1125   | 124523 | 8.5  | KIAA0638 splice variant 2                                                                                                                                                                                   |
| 2671 | Q86UU1-2         | 3                    | 3              | 2.8                   | 1319   | 144739 | 8.6  | Isoform 2 of Q86UU1                                                                                                                                                                                         |
| 2671 | Q86UU1           | 3                    | 3              | 2.7                   | 1377   | 151161 | 8.6  | Pleckstrin homology-like domain family B member 1                                                                                                                                                           |
| 2672 | Q12873-2         | 3                    | 3              | 3.3                   | 1966   | 222859 | 7.5  | Isoform 2 of Q12873                                                                                                                                                                                         |
| 2672 | Q12873           | 3                    | 3              | 3.2                   | 2000   | 226590 | 7.3  | Chromodomain helicase-DNA-binding protein 3                                                                                                                                                                 |
| 2672 | UPI00004432F5    | 3                    | 3              | 3.2                   | 2045   | 231360 | 6.4  | chromodomain helicase DNA binding protein 3 isoform 3                                                                                                                                                       |
| 2673 | Q15031           | 3                    | 4              | 3.2                   | 903    | 101976 | 8.2  | Probable leucyl-tRNA synthetase, mitochondrial precursor                                                                                                                                                    |
| 2674 | UPI000059D6BC    | 3                    | 3              | 3.4                   | 1040   | 116286 | 8.6  | Putative splicing factor, arginine/serine-rich 14 (Arginine/serine- rich-splicing factor 14).                                                                                                               |
| 2674 | Q8IX01-4         | 3                    | 3              | 3.4                   | 1030   | 115216 | 8.6  | Isoform 4 of Q8IX01                                                                                                                                                                                         |

| No.  | Accession Number | Unique Peptide Count | Spectrum Count | Sequence Coverage (%) | Length | MolWt  | pI  | Descriptive Name                                                                                                                                                                                                                          |
|------|------------------|----------------------|----------------|-----------------------|--------|--------|-----|-------------------------------------------------------------------------------------------------------------------------------------------------------------------------------------------------------------------------------------------|
| 2674 | Q8IX01-3         | 3                    | 3              | 3.4                   | 1040   | 116316 | 8.6 | Isoform 3 of Q8IX01                                                                                                                                                                                                                       |
| 2674 | Q8IX01           | 3                    | 3              | 3.2                   | 1082   | 120237 | 7.3 | Putative splicing factor, arginine/serine-rich 14                                                                                                                                                                                         |
| 2674 | UPI000019825D    | 3                    | 3              | 3.2                   | 1082   | 120207 | 7.3 | Putative splicing factor, arginine/serine-rich 14 (Arginine/serine-rich-splicing factor 14).                                                                                                                                              |
| 2675 | Q8N3X1           | 3                    | 4              | 3.2                   | 1015   | 110064 | 4.7 | Formin binding protein 4                                                                                                                                                                                                                  |
| 2675 | Q9NT81           | 3                    | 4              | 3.2                   | 1013   | 109875 | 4.7 | Hypothetical protein DKFZp434M2023                                                                                                                                                                                                        |
| 2675 | UPI0000DBEF37    | 3                    | 4              | 3.1                   | 1017   | 110266 | 4.7 | formin binding protein 4                                                                                                                                                                                                                  |
| 2675 | UPI0000D625EC    | 3                    | 4              | 3.1                   | 1019   | 110451 | 4.8 | formin binding protein 4                                                                                                                                                                                                                  |
| 2675 | Q9Y2L7           | 3                    | 4              | 3                     | 1050   | 113630 | 4.8 | Formin-binding protein 4                                                                                                                                                                                                                  |
| 2676 | P20936-2         | 3                    | 5              | 3.7                   | 870    | 100398 | 7.6 | Isoform 2 of P20936                                                                                                                                                                                                                       |
| 2676 | P20936           | 3                    | 5              | 3.1                   | 1047   | 116403 | 6.5 | Ras GTPase-activating protein 1                                                                                                                                                                                                           |
| 2676 | UPI000013DA03    | 3                    | 5              | 3.1                   | 1047   | 116391 | 6.5 | Ras GTPase-activating protein 1 (GTPase-activating protein) (GAP) (Ras p21 protein activator) (p120GAP) (RasGAP).                                                                                                                         |
| 2677 | P31327           | 3                    | 9              | 3.1                   | 1500   | 164939 | 6.7 | Carbamoyl-phosphate synthase [ammonia], mitochondrial precursor                                                                                                                                                                           |
| 2677 | Q59HF8           | 3                    | 9              | 3.1                   | 1510   | 166117 | 6.8 | Carbamoyl-phosphate synthetase 1 variant                                                                                                                                                                                                  |
| 2678 | O95197-3         | 3                    | 63             | 13.1                  | 236    | 25609  | 8.5 | Isoform 3 of O95197                                                                                                                                                                                                                       |
| 2678 | O95197-4         | 3                    | 63             | 12.2                  | 255    | 27568  | 8.2 | Isoform 4 of O95197                                                                                                                                                                                                                       |
| 2678 | UPI0000D62622    | 3                    | 63             | 12.1                  | 257    | 27753  | 8.2 | Reticulon-3 (Neuroendocrine-specific protein-like 2) (NSP-like protein II) (NSPLII).                                                                                                                                                      |
| 2678 | O95197-2         | 3                    | 63             | 3.1                   | 1013   | 110652 | 5   | Isoform 2 of O95197                                                                                                                                                                                                                       |
| 2678 | O95197           | 3                    | 63             | 3                     | 1032   | 112611 | 5   | Reticulon-3                                                                                                                                                                                                                               |
| 2678 | UPI0000D62623    | 3                    | 63             | 3                     | 1034   | 112754 | 5   | Reticulon-3 (Neuroendocrine-specific protein-like 2) (NSP-like protein II) (NSPLII).                                                                                                                                                      |
| 2679 | Q01831           | 3                    | 3              | 3                     | 940    | 105981 | 8.9 | DNA-repair protein complementing XP-C cells                                                                                                                                                                                               |
| 2679 | UPI000013DDC9    | 3                    | 3              | 3                     | 937    | 105723 | 8.9 | DNA-repair protein complementing XP-C cells (Xeroderma pigmentosum group C-complementing protein) (p125).                                                                                                                                 |
| 2679 | UPI0000073ED0    | 3                    | 3              | 3                     | 940    | 105953 | 8.9 | xeroderma pigmentosum, complementation group C                                                                                                                                                                                            |
| 2680 | Q12913           | 3                    | 6              | 3                     | 1337   | 145927 | 5.6 | Receptor-type tyrosine-protein phosphatase eta precursor                                                                                                                                                                                  |
| 2680 | UPI00004564C8    | 3                    | 6              | 3                     | 1337   | 145941 | 5.6 | Receptor-type tyrosine-protein phosphatase eta precursor (EC 3.1.3.48) (Protein-tyrosine phosphatase eta) (R-PTP-eta) (HPTP eta) (Protein-tyrosine phosphatase receptor type J) (Density-enhanced phosphatase 1) (DEP-1) (CD148 antigen). |
| 2681 | Q5VT52-3         | 3                    | 7              | 3                     | 1435   | 152875 | 7   | Isoform 3 of Q5VT52                                                                                                                                                                                                                       |
| 2681 | Q5VT52           | 3                    | 7              | 2.9                   | 1461   | 156019 | 7.4 | Uncharacterized protein KIAA0460                                                                                                                                                                                                          |
| 2682 | Q96PV8           | 3                    | 3              | 5.1                   | 664    | 71749  | 5.9 | KIAA1930 protein                                                                                                                                                                                                                          |
| 2682 | Q9H8D9           | 3                    | 3              | 4                     | 858    | 91131  | 5.4 | CDNA FLJ13725 fis, clone PLACE3000009, weakly similar to DNA-DIRECTED RNA POLYMERASE II LARGEST SUBUNIT                                                                                                                                   |
| 2682 | Q6ZS17           | 3                    | 3              | 2.8                   | 1223   | 132307 | 6.3 | Protein FAM65A                                                                                                                                                                                                                            |
| 2682 | UPI0000231CA4    | 3                    | 3              | 2.8                   | 1219   | 131873 | 6.3 | hypothetical protein LOC79567                                                                                                                                                                                                             |
| 2683 | Q9H7N4           | 3                    | 4              | 2.8                   | 1343   | 142483 | 9.4 | FLJ00034 protein                                                                                                                                                                                                                          |
| 2683 | Q9NR59           | 3                    | 4              | 2.8                   | 1312   | 139269 | 9.2 | Ser/arg-rich pre-mRNA splicing factor SR-A1                                                                                                                                                                                               |
| 2684 | UPI000013F07D    | 3                    | 10             | 4.6                   | 802    | 90609  | 6.3 | KIAA1794 (KIAA1794), mRNA                                                                                                                                                                                                                 |
| 2684 | Q9NVI1-3         | 3                    | 10             | 2.8                   | 1328   | 149335 | 6.7 | Isoform 3 of Q9NVI1                                                                                                                                                                                                                       |
| 2685 | Q68DI5           | 3                    | 5              | 3.7                   | 983    | 111509 | 6.3 | Hypothetical protein DKFZp781H1425                                                                                                                                                                                                        |
| 2685 | O95163           | 3                    | 5              | 2.7                   | 1332   | 150191 | 6   | Elongator complex protein 1                                                                                                                                                                                                               |
| 2685 | Q8N516           | 3                    | 5              | 2.7                   | 1332   | 150223 | 6   | Inhibitor of kappa light polypeptide gene enhancer in B-cells, kinase complex-associated protein                                                                                                                                          |
| 2685 | Q4LE38           | 3                    | 5              | 2.7                   | 1342   | 151455 | 6   | IKBKAP variant protein                                                                                                                                                                                                                    |
| 2686 | Q9ULU4-6         | 3                    | 3              | 2.8                   | 1023   | 112892 | 6.7 | Isoform 6 of Q9ULU4                                                                                                                                                                                                                       |
| 2686 | Q2HXV4           | 3                    | 3              | 2.7                   | 1088   | 120828 | 6.3 | RACK7 isoform i                                                                                                                                                                                                                           |
| 2686 | Q2HXV1           | 3                    | 3              | 2.6                   | 1134   | 126415 | 6.7 | RACK7 isoform I                                                                                                                                                                                                                           |
| 2686 | UPI000053F609    | 3                    | 3              | 2.6                   | 1107   | 123518 | 6.4 | Protein kinase C-binding protein 1 (Rack7) (Cutaneous T-cell lymphoma-associated antigen se14-3) (CTCL tumor antigen se14-3) (Zinc finger MYND domain-containing protein 8).                                                              |
| 2686 | Q9ULU4-8         | 3                    | 3              | 2.6                   | 1106   | 123387 | 6.4 | Isoform 8 of Q9ULU4                                                                                                                                                                                                                       |
| 2686 | Q2HXW0           | 3                    | 3              | 2.6                   | 1135   | 125470 | 6.5 | RACK7 isoform c                                                                                                                                                                                                                           |
| 2686 | Q9ULU4-5         | 3                    | 3              | 2.5                   | 1180   | 130926 | 6.9 | Isoform 5 of Q9ULU4                                                                                                                                                                                                                       |
| 2686 | Q2HXW1           | 3                    | 3              | 2.5                   | 1160   | 128371 | 6.4 | RACK7 isoform b                                                                                                                                                                                                                           |
| 2686 | Q2HXV9           | 3                    | 3              | 2.5                   | 1163   | 128680 | 6.7 | RACK7 isoform d                                                                                                                                                                                                                           |
| 2686 | Q2HXV7           | 3                    | 3              | 2.5                   | 1181   | 131057 | 6.9 | RACK7 isoform f                                                                                                                                                                                                                           |
| 2686 | Q9ULU4-7         | 3                    | 3              | 2.4                   | 1233   | 137036 | 7.1 | Isoform 7 of Q9ULU4                                                                                                                                                                                                                       |
| 2686 | Q9ULU4           | 3                    | 3              | 2.4                   | 1186   | 131692 | 7.2 | Protein kinase C-binding protein 1                                                                                                                                                                                                        |
| 2686 | Q2HXW2           | 3                    | 3              | 2.4                   | 1188   | 131580 | 6.6 | RACK7 isoform a                                                                                                                                                                                                                           |
| 2686 | Q2HXV8           | 3                    | 3              | 2.4                   | 1234   | 137167 | 7.1 | RACK7 isoform e                                                                                                                                                                                                                           |
| 2687 | Q8WXD9           | 3                    | 3              | 2.6                   | 1431   | 149813 | 9.1 | Caskin-1                                                                                                                                                                                                                                  |
| 2687 | UPI00004568FC    | 3                    | 3              | 2.6                   | 1432   | 149857 | 9.2 | Caskin-1 (CASK-interacting protein 1).                                                                                                                                                                                                    |
| 2688 | Q96RT1-7         | 3                    | 8              | 2.6                   | 1302   | 146086 | 5.3 | Isoform 7 of Q96RT1                                                                                                                                                                                                                       |
| 2688 | AOAVR1           | 3                    | 8              | 2.5                   | 1371   | 153952 | 5.5 | ErbB2 interacting protein                                                                                                                                                                                                                 |
| 2688 | UPI0000D61630    | 3                    | 8              | 2.5                   | 1361   | 152723 | 5.4 | Protein LAP2 (ErbB2-interacting protein) (Erbin) (Densin-180-like protein).                                                                                                                                                               |
| 2688 | Q96RT1-6         | 3                    | 8              | 2.5                   | 1340   | 150601 | 5.5 | Isoform 6 of Q96RT1                                                                                                                                                                                                                       |

| No.  | Accession Number | Unique Peptide Count | Spectrum Count | Sequence Coverage (%) | Length | MolWt  | pI  | Descriptive Name                                                                                                                                                     |
|------|------------------|----------------------|----------------|-----------------------|--------|--------|-----|----------------------------------------------------------------------------------------------------------------------------------------------------------------------|
| 2688 | Q96RT1-5         | 3                    | 8              | 2.5                   | 1356   | 152290 | 5.4 | Isoform 5 of Q96RT1                                                                                                                                                  |
| 2688 | Q96RT1-4         | 3                    | 8              | 2.5                   | 1346   | 151251 | 5.4 | Isoform 4 of Q96RT1                                                                                                                                                  |
| 2688 | Q96RT1-3         | 3                    | 8              | 2.5                   | 1360   | 152652 | 5.4 | Isoform 3 of Q96RT1                                                                                                                                                  |
| 2688 | Q96RT1-2         | 3                    | 8              | 2.5                   | 1371   | 153926 | 5.5 | Isoform 2 of Q96RT1                                                                                                                                                  |
| 2688 | Q1RMD0           | 3                    | 8              | 2.5                   | 1371   | 153788 | 5.5 | ErbB2 interacting protein                                                                                                                                            |
| 2688 | Q1RMC9           | 3                    | 8              | 2.5                   | 1367   | 153515 | 5.5 | ERBB2IP protein                                                                                                                                                      |
| 2688 | Q96RT1           | 3                    | 8              | 2.4                   | 1412   | 158297 | 5.5 | Protein LAP2                                                                                                                                                         |
| 2689 | Q9NP73           | 3                    | 3              | 17                    | 165    | 18225  | 6.5 | Probable glycosyltransferase GLT28D1                                                                                                                                 |
| 2689 | A2A2G2           | 3                    | 3              | 2.5                   | 1137   | 126056 | 6.7 | Chromosome X open reading frame 45                                                                                                                                   |
| 2690 | O14646           | 3                    | 5              | 2.5                   | 1709   | 196517 | 7.2 | Chromodomain-helicase-DNA-binding protein 1                                                                                                                          |
| 2690 | UPI000013DD75    | 3                    | 5              | 2.5                   | 1710   | 196687 | 7.1 | chromodomain helicase DNA binding protein 1                                                                                                                          |
| 2690 | Q17RZ3           | 3                    | 5              | 2.5                   | 1709   | 196589 | 7.1 | Chromodomain helicase DNA binding protein 1                                                                                                                          |
| 2691 | O14981           | 3                    | 7              | 2.5                   | 1849   | 206886 | 6.5 | TATA-binding protein-associated factor 172 (EC 3.6.1.-) (ATP-dependent helicase BTAF1) (TBP-associated factor 172) (TAF-172) (TAF(II)170)                            |
| 2692 | Q7Z478           | 3                    | 9              | 2.5                   | 1369   | 155235 | 8.1 | Putative ATP-dependent RNA helicase DHX29                                                                                                                            |
| 2693 | Q9P2D5           | 3                    | 10             | 2.5                   | 1386   | 154717 | 8.1 | Transmembrane protein 2                                                                                                                                              |
| 2694 | O95104           | 3                    | 19             | 2.4                   | 1147   | 125869 | 9.6 | Splicing factor, arginine/serine-rich 15                                                                                                                             |
| 2694 | Q0P607           | 3                    | 19             | 2.4                   | 1146   | 125740 | 9.6 | Splicing factor, arginine/serine-rich 15                                                                                                                             |
| 2694 | O95104-2         | 3                    | 19             | 2.4                   | 1125   | 123643 | 9.6 | Isoform 2 of O95104                                                                                                                                                  |
| 2695 | Q14671-2         | 3                    | 3              | 2.5                   | 1162   | 124420 | 6.8 | Isoform 2 of Q14671                                                                                                                                                  |
| 2695 | Q14671           | 3                    | 3              | 2.4                   | 1186   | 126473 | 6.8 | Pumilio homolog 1                                                                                                                                                    |
| 2695 | UPI0000203D8E    | 3                    | 3              | 2.4                   | 1188   | 126685 | 6.8 | pumilio 1 isoform 1                                                                                                                                                  |
| 2695 | Q5VXY8           | 3                    | 3              | 2.4                   | 1189   | 126756 | 6.8 | Pumilio homolog 1                                                                                                                                                    |
| 2695 | Q5VXY5           | 3                    | 3              | 2.4                   | 1224   | 130108 | 6.9 | Pumilio homolog 1                                                                                                                                                    |
| 2695 | Q53HH5           | 3                    | 3              | 2.4                   | 1188   | 126708 | 6.8 | Pumilio homolog 1 variant                                                                                                                                            |
| 2696 | Q96T23           | 3                    | 5              | 2.4                   | 1431   | 163005 | 5   | Remodeling and spacing factor 1                                                                                                                                      |
| 2696 | UPI00004FCB0F    | 3                    | 5              | 2.4                   | 1400   | 159300 | 5   | Remodeling and spacing factor 1 (Rsf-1) (Hepatitis B virus X- associated protein) (HBV pX-associated protein 8) (p325 subunit of RSF chromatin remodelling complex). |
| 2696 | UPI00001FB001    | 3                    | 5              | 2.4                   | 1441   | 163820 | 5   | remodeling and spacing factor 1                                                                                                                                      |
| 2696 | Q96T23-2         | 3                    | 5              | 2.4                   | 1400   | 159314 | 5   | Isoform 2 of Q96T23                                                                                                                                                  |
| 2697 | P42695           | 3                    | 6              | 2.3                   | 1498   | 168890 | 7.5 | Condensin-II complex subunit D3                                                                                                                                      |
| 2697 | UPI0000D626A5    | 3                    | 6              | 2.3                   | 1501   | 169232 | 7.6 | Condensin-II complex subunit D3 (Non-SMC condensin II complex subunit D3) (hCAP-D3).                                                                                 |
| 2698 | Q2Q1W1           | 3                    | 3              | 2.4                   | 1439   | 160772 | 5.2 | Rab5-activating protein 6                                                                                                                                            |
| 2698 | Q14C86           | 3                    | 3              | 2.3                   | 1460   | 162897 | 5.2 | GTPase activating protein and VPS9 domain-containing protein 1                                                                                                       |
| 2698 | UPI00001D76F1    | 3                    | 3              | 2.3                   | 1487   | 166168 | 5.2 | GTPase activating protein and VPS9 domains 1                                                                                                                         |
| 2698 | Q9P207           | 3                    | 3              | 2.3                   | 1484   | 165637 | 5.2 | KIAA1521 protein                                                                                                                                                     |
| 2699 | P42356           | 3                    | 4              | 2.2                   | 2044   | 231290 | 6.9 | Phosphatidylinositol 4-kinase alpha                                                                                                                                  |
| 2699 | UPI00001AE78E    | 3                    | 4              | 2.2                   | 2044   | 231317 | 6.9 | Phosphatidylinositol 4-kinase alpha (EC 2.7.1.67) (PI4-kinase alpha) (PtdIns-4-kinase alpha) (PI4K-alpha).                                                           |
| 2699 | Q4LE69           | 3                    | 4              | 2.1                   | 2121   | 238695 | 7.1 | PIK4CA variant protein                                                                                                                                               |
| 2700 | O95602           | 3                    | 3              | 2.1                   | 1717   | 194190 | 7.2 | DNA-directed RNA polymerase I largest subunit                                                                                                                        |
| 2700 | UPI0000456DEC    | 3                    | 3              | 2.1                   | 1716   | 194130 | 7.1 | DNA-directed RNA polymerase I largest subunit (EC 2.7.7.6) (RNA polymerase I 194 kDa subunit) (RPA194).                                                              |
| 2700 | Q0VG05           | 3                    | 3              | 2.1                   | 1720   | 194810 | 7   | Polymerase (RNA) I polypeptide A, 194kDa                                                                                                                             |
| 2701 | Q8TEQ6           | 3                    | 4              | 2.1                   | 1508   | 168560 | 6.6 | Gem-associated protein 5                                                                                                                                             |
| 2701 | UPI000020D072    | 3                    | 4              | 2.1                   | 1508   | 168589 | 6.6 | Gem-associated protein 5 (Gemin5).                                                                                                                                   |
| 2702 | Q13395           | 3                    | 4              | 2                     | 1621   | 181674 | 7.1 | Probable methyltransferase TARBP1                                                                                                                                    |
| 2703 | Q96JI4           | 3                    | 17             | 2                     | 1778   | 200950 | 6.8 | KIAA1843 protein                                                                                                                                                     |
| 2704 | Q9Y4K1           | 3                    | 3              | 2                     | 1723   | 188675 | 5.9 | Absent in melanoma 1 protein                                                                                                                                         |
| 2704 | UPI000050B6CA    | 3                    | 3              | 2                     | 1723   | 188616 | 5.9 | absent in melanoma 1                                                                                                                                                 |
| 2705 | UPI0000DD7D5C    | 3                    | 3              | 2                     | 1977   | 209273 | 8.5 | PREDICTED: similar to NHS-like 1 isoform 1                                                                                                                           |
| 2706 | Q5T2J2           | 3                    | 4              | 1.9                   | 1661   | 183857 | 6.5 | Novel protein                                                                                                                                                        |
| 2707 | Q9NZM3-2         | 3                    | 3              | 2                     | 1669   | 190364 | 8.2 | Isoform 2 of Q9NZM3                                                                                                                                                  |
| 2707 | Q9NZM3           | 3                    | 3              | 1.9                   | 1696   | 193329 | 8.1 | Intersectin-2                                                                                                                                                        |
| 2708 | Q460N5           | 3                    | 5              | 1.8                   | 1720   | 193752 | 8   | Poly [ADP-ribose] polymerase 14                                                                                                                                      |
| 2709 | Q9H3S7           | 3                    | 3              | 1.8                   | 1636   | 178972 | 6.9 | Tyrosine-protein phosphatase non-receptor type 23                                                                                                                    |
| 2710 | A1YCA4           | 3                    | 7              | 1.7                   | 2154   | 231133 | 5.7 | SEC16L                                                                                                                                                               |
| 2710 | O15027-3         | 3                    | 7              | 1.7                   | 2159   | 231249 | 5.6 | Isoform 3 of O15027                                                                                                                                                  |
| 2710 | O15027-2         | 3                    | 7              | 1.7                   | 2134   | 228868 | 5.6 | Isoform 2 of O15027                                                                                                                                                  |
| 2710 | O15027           | 3                    | 7              | 1.7                   | 2179   | 233515 | 5.6 | Uncharacterized protein KIAA0310                                                                                                                                     |
| 2711 | A2RUU9           | 3                    | 5              | 1.6                   | 1859   | 209905 | 5   | PCM1 protein                                                                                                                                                         |
| 2711 | UPI0000F58ED3    | 3                    | 5              | 1.5                   | 2024   | 228531 | 5   | pericentriolar material 1                                                                                                                                            |
| 2711 | UPI000049E0B4    | 3                    | 5              | 1.5                   | 2022   | 228454 | 5   | Pericentriolar material 1 protein (PCM-1) (hPCM-1).                                                                                                                  |
| 2711 | Q15154-2         | 3                    | 5              | 1.5                   | 1968   | 222209 | 5   | Isoform 2 of Q15154                                                                                                                                                  |
| 2711 | Q15154           | 3                    | 5              | 1.5                   | 2023   | 228533 | 5   | Pericentriolar material 1 protein                                                                                                                                    |
| 2712 | Q5VTN2           | 3                    | 4              | 1.5                   | 2193   | 250502 | 7.2 | OTTHUMP00000016904                                                                                                                                                   |
| 2712 | UPI0000D614A0    | 3                    | 4              | 1.5                   | 2192   | 250507 | 7.1 | Activating signal cointegrator 1 complex subunit 3 (EC 3.6.1.-) (ASC-1 complex subunit p200) (Trip4 complex subunit p200) (Helicase, ATP binding 1).                 |
| 2712 | UPI000014145A    | 3                    | 4              | 1.5                   | 2202   | 251458 | 7.1 | activating signal cointegrator 1 complex subunit 3 isoform a                                                                                                         |
| 2712 | Q8N3C0-2         | 3                    | 4              | 1.5                   | 2193   | 250651 | 7.1 | Isoform 2 of Q8N3C0                                                                                                                                                  |

| No.  | Accession Number | Unique Peptide Count | Spectrum Count | Sequence Coverage (%) | Length | MolWt  | pI   | Descriptive Name                                                                                                                                                                                                                                                |
|------|------------------|----------------------|----------------|-----------------------|--------|--------|------|-----------------------------------------------------------------------------------------------------------------------------------------------------------------------------------------------------------------------------------------------------------------|
| 2712 | Q8N3C0           | 3                    | 4              | 1.5                   | 2202   | 251488 | 7.1  | Activating signal cointegrator 1 complex subunit 3                                                                                                                                                                                                              |
| 2713 | UPI000016001C    | 3                    | 3              | 1.5                   | 2288   | 259840 | 6.8  | transcriptional regulator ATRX isoform 3                                                                                                                                                                                                                        |
| 2713 | P46100           | 3                    | 3              | 1.4                   | 2492   | 282564 | 6.6  | Transcriptional regulator ATRX                                                                                                                                                                                                                                  |
| 2713 | UPI0000DD8684    | 3                    | 3              | 1.4                   | 2493   | 282810 | 6.6  | PREDICTED: similar to transcriptional regulator ATRX isoform 1                                                                                                                                                                                                  |
| 2713 | UPI0000D61D94    | 3                    | 3              | 1.4                   | 2424   | 274983 | 6.4  | Transcriptional regulator ATRX (EC 3.6.1.-) (ATP-dependent helicase ATRX) (X-linked helicase II) (X-linked nuclear protein) (XNP) (Znf- HX).                                                                                                                    |
| 2713 | UPI0000161F78    | 3                    | 3              | 1.4                   | 2492   | 282584 | 6.6  | transcriptional regulator ATRX isoform 1                                                                                                                                                                                                                        |
| 2713 | UPI000016001B    | 3                    | 3              | 1.4                   | 2454   | 278226 | 6.5  | transcriptional regulator ATRX isoform 2                                                                                                                                                                                                                        |
| 2713 | P46100-4         | 3                    | 3              | 1.4                   | 2454   | 278206 | 6.6  | Isoform 3 of P46100                                                                                                                                                                                                                                             |
| 2713 | P46100-3         | 3                    | 3              | 1.4                   | 2375   | 269789 | 7    | Isoform 2 of P46100                                                                                                                                                                                                                                             |
| 2714 | UPI0000E8AC98    | 3                    | 15             | 1.4                   | 2610   | 289383 | 5.4  | HECT domain containing 1                                                                                                                                                                                                                                        |
| 2715 | Q4LE74           | 3                    | 8              | 1.4                   | 2028   | 229712 | 8.6  | MYO9B variant protein                                                                                                                                                                                                                                           |
| 2715 | Q13459-2         | 3                    | 8              | 1.4                   | 2023   | 229298 | 8.5  | Isoform Short of Q13459                                                                                                                                                                                                                                         |
| 2715 | Q13459           | 3                    | 8              | 1.3                   | 2158   | 243555 | 8.7  | Myosin-IXb                                                                                                                                                                                                                                                      |
| 2715 | UPI0000D61740    | 3                    | 8              | 1.3                   | 2157   | 243354 | 8.8  | Myosin-9B (Myosin IXb) (Unconventional myosin-9b).                                                                                                                                                                                                              |
| 2715 | UPI00001B55A5    | 3                    | 8              | 1.3                   | 2157   | 243398 | 8.8  | myosin IXB                                                                                                                                                                                                                                                      |
| 2716 | Q93008           | 3                    | 7              | 1.3                   | 2547   | 289539 | 5.7  | Probable ubiquitin carboxyl-terminal hydrolase FAF-X                                                                                                                                                                                                            |
| 2716 | UPI0000D61D4F    | 3                    | 7              | 1.3                   | 2563   | 291447 | 5.7  | Probable ubiquitin carboxyl-terminal hydrolase FAF-X (EC 3.1.2.15) (Ubiquitin thioesterase FAF-X) (Ubiquitin-specific-processing protease FAF-X) (Deubiquitinating enzyme FAF-X) (Fat facets protein-related, X- linked) (Ubiquitin-specific protease 9, X chro |
| 2716 | UPI0000D61D4E    | 3                    | 7              | 1.3                   | 2564   | 291492 | 5.8  | Probable ubiquitin carboxyl-terminal hydrolase FAF-X (EC 3.1.2.15) (Ubiquitin thioesterase FAF-X) (Ubiquitin-specific-processing protease FAF-X) (Deubiquitinating enzyme FAF-X) (Fat facets protein-related, X- linked) (Ubiquitin-specific protease 9, X chro |
| 2716 | UPI00006AB82F    | 3                    | 7              | 1.3                   | 2554   | 290495 | 5.8  | ubiquitin specific protease 9, X-linked isoform 4                                                                                                                                                                                                               |
| 2716 | UPI00006AB82E    | 3                    | 7              | 1.3                   | 2570   | 292312 | 5.8  | ubiquitin specific protease 9, X-linked isoform 3                                                                                                                                                                                                               |
| 2716 | Q93008-2         | 3                    | 7              | 1.3                   | 2563   | 291356 | 5.7  | Isoform Long of Q93008                                                                                                                                                                                                                                          |
| 2717 | Q95071           | 3                    | 3              | 1.2                   | 2799   | 309352 | 5.8  | E3 ubiquitin-protein ligase EDD1                                                                                                                                                                                                                                |
| 2717 | UPI000052A0EC    | 3                    | 3              | 1.2                   | 2796   | 309192 | 6.1  | PREDICTED: similar to E3 ubiquitin protein ligase, HECT domain containing, 1                                                                                                                                                                                    |
| 2717 | UPI00004576D7    | 3                    | 3              | 1.2                   | 2798   | 309307 | 5.9  | Ubiquitin-protein ligase EDD1 (EC 6.3.2.-) (Hyperplastic discs protein homolog) (hHYD) (Progesterin-induced protein).                                                                                                                                           |
| 2718 | A4D265           | 3                    | 6              | 1                     | 3830   | 434416 | 8.2  | Transformation/transcription domain-associated protein                                                                                                                                                                                                          |
| 2718 | Q9Y4A5           | 3                    | 6              | 1                     | 3859   | 437603 | 8.2  | Transformation/transcription domain-associated protein                                                                                                                                                                                                          |
| 2719 | UPI000051946B    | 3                    | 4              | 0.9                   | 4588   | 506278 | 5    | FAT tumor suppressor 1 precursor                                                                                                                                                                                                                                |
| 2719 | Q14517           | 3                    | 4              | 0.8                   | 4590   | 506283 | 5    | Cadherin-related tumor suppressor homolog precursor                                                                                                                                                                                                             |
| 2719 | UPI0000457904    | 3                    | 4              | 0.8                   | 4594   | 506958 | 5    | Cadherin-related tumor suppressor homolog precursor (Protein fat homolog).                                                                                                                                                                                      |
| 2720 | P14618-2         | 2                    | 8              | 62                    | 531    | 58062  | 7.7  | Isoform M1 of P14618                                                                                                                                                                                                                                            |
| 2721 | Q15149-4         | 2                    | 25             | 53.3                  | 4547   | 516174 | 5.8  | Isoform 4 of Q15149                                                                                                                                                                                                                                             |
| 2721 | UPI0000457914    | 2                    | 25             | 53.3                  | 4547   | 516075 | 5.8  | Plectin-1 (PLTN) (PCN) (Hemidesmosomal protein 1) (HD1).                                                                                                                                                                                                        |
| 2721 | UPI0000233FD1    | 2                    | 25             | 53.3                  | 4547   | 516204 | 5.8  | plectin 1 isoform 11                                                                                                                                                                                                                                            |
| 2722 | O43852-2         | 2                    | 4              | 50.5                  | 315    | 37135  | 4.6  | Isoform 2 of O43852                                                                                                                                                                                                                                             |
| 2723 | Q96G68           | 2                    | 10             | 48.7                  | 39     | 4414   | 9.7  | C1orf151 protein                                                                                                                                                                                                                                                |
| 2724 | Q9UNX3           | 2                    | 3              | 45.5                  | 145    | 17256  | 10.6 | 60S ribosomal protein L26-like 1                                                                                                                                                                                                                                |
| 2725 | P62834           | 2                    | 2              | 45.1                  | 184    | 20987  | 6.6  | Ras-related protein Rap-1A precursor                                                                                                                                                                                                                            |
| 2726 | P06753           | 2                    | 3              | 42.6                  | 284    | 32819  | 4.7  | Tropomyosin alpha-3 chain                                                                                                                                                                                                                                       |
| 2726 | UPI0000456267    | 2                    | 3              | 42.5                  | 285    | 32996  | 4.7  | Tropomyosin alpha-3 chain (Tropomyosin-3) (Tropomyosin gamma) (hTM5).                                                                                                                                                                                           |
| 2726 | UPI000013D90D    | 2                    | 3              | 42.5                  | 285    | 32950  | 4.7  | tropomyosin 3 isoform 1                                                                                                                                                                                                                                         |
| 2727 | O94925-3         | 2                    | 5              | 42.1                  | 598    | 65460  | 7.9  | Isoform GAC of O94925                                                                                                                                                                                                                                           |
| 2728 | Q16143           | 2                    | 3              | 41.8                  | 134    | 14288  | 4.4  | Beta-synuclein                                                                                                                                                                                                                                                  |
| 2729 | Q9HB66           | 2                    | 5              | 41.3                  | 63     | 7264   | 9.6  | PNAS-117                                                                                                                                                                                                                                                        |
| 2730 | O75506           | 2                    | 8              | 39.5                  | 76     | 8544   | 4.4  | Heat shock factor-binding protein 1                                                                                                                                                                                                                             |
| 2730 | UPI000013E5CF    | 2                    | 8              | 36.1                  | 83     | 9349   | 4.4  | Heat shock factor-binding protein 1 (Nasopharyngeal carcinoma- associated antigen 13) (NPC-A-13).                                                                                                                                                               |
| 2731 | Q71UM5           | 2                    | 15             | 39.3                  | 84     | 9477   | 9.5  | 40S ribosomal protein S27-like protein                                                                                                                                                                                                                          |
| 2731 | UPI000049DDE1    | 2                    | 15             | 33                    | 100    | 11346  | 9.3  | 40S ribosomal protein S27-like protein.                                                                                                                                                                                                                         |
| 2732 | Q96A08           | 2                    | 11             | 38.6                  | 127    | 14167  | 10.3 | Histone H2B type 1-A                                                                                                                                                                                                                                            |
| 2733 | Q9UDW1           | 2                    | 4              | 38.1                  | 63     | 7308   | 9.5  | Ubiquinol-cytochrome c reductase complex 7.2 kDa protein                                                                                                                                                                                                        |
| 2734 | Q9GZV4           | 2                    | 2              | 37.9                  | 153    | 16793  | 5.6  | Eukaryotic translation initiation factor 5A-2                                                                                                                                                                                                                   |
| 2735 | P12235           | 2                    | 7              | 36.2                  | 298    | 33064  | 9.8  | ADP/ATP translocase 1                                                                                                                                                                                                                                           |
| 2736 | O75438           | 2                    | 2              | 34.5                  | 58     | 6961   | 8.9  | NADH dehydrogenase [ubiquinone] 1 beta subcomplex subunit 1                                                                                                                                                                                                     |

| No.  | Accession Number | Unique Peptide Count | Spectrum Count | Sequence Coverage (%) | Length | MolWt | pI   | Descriptive Name                                                                                                                       |
|------|------------------|----------------------|----------------|-----------------------|--------|-------|------|----------------------------------------------------------------------------------------------------------------------------------------|
| 2737 | Q9Y5U9           | 2                    | 6              | 34.1                  | 82     | 8969  | 8.3  | Immediate early response 3-interacting protein 1                                                                                       |
| 2738 | Q6NS89           | 2                    | 3              | 33.3                  | 117    | 13129 | 5.9  | Mediator of RNA polymerase II transcription, subunit 11 homolog                                                                        |
| 2738 | Q9P086           | 2                    | 3              | 28.7                  | 136    | 15301 | 8.8  | Mediator of RNA polymerase II transcription subunit 11                                                                                 |
| 2739 | Q43504           | 2                    | 6              | 33                    | 91     | 9614  | 4.9  | Hepatitis B virus X-interacting protein                                                                                                |
| 2739 | UPI0000205288    | 2                    | 6              | 17.3                  | 173    | 18158 | 5.5  | hepatitis B virus x-interacting protein                                                                                                |
| 2740 | Q8WVE3           | 2                    | 3              | 32.9                  | 85     | 9509  | 5.9  | MGC13017 protein                                                                                                                       |
| 2740 | Q96HQ2           | 2                    | 3              | 24.1                  | 116    | 13196 | 5    | Similar to RIKEN cDNA A430101B06 gene                                                                                                  |
| 2741 | P01112           | 2                    | 5              | 32.8                  | 189    | 21298 | 5.3  | GTPase HRas precursor                                                                                                                  |
| 2742 | Q5RI17           | 2                    | 6              | 32.8                  | 723    | 79844 | 7.9  | Heterogeneous nuclear ribonucleoprotein U                                                                                              |
| 2743 | Q8NHG7           | 2                    | 4              | 32.5                  | 77     | 8443  | 8.9  | Small VCP/p97-interacting protein                                                                                                      |
| 2743 | UPI00006C1109    | 2                    | 4              | 31.6                  | 79     | 9023  | 9.8  | PREDICTED: similar to Small VCP/p97-interacting protein isoform 6                                                                      |
| 2743 | UPI00006C1108    | 2                    | 4              | 31.6                  | 79     | 8649  | 8    | PREDICTED: similar to Small VCP/p97-interacting protein isoform 5                                                                      |
| 2744 | A1L188           | 2                    | 2              | 32.4                  | 74     | 7756  | 9.3  | Hypothetical LOC284184                                                                                                                 |
| 2745 | P59768           | 2                    | 6              | 32.4                  | 71     | 7850  | 8    | Guanine nucleotide-binding protein G(I)/G(S)/G(O) gamma-2 subunit precursor                                                            |
| 2746 | P61970           | 2                    | 6              | 32.3                  | 127    | 14478 | 5.4  | Nuclear transport factor 2                                                                                                             |
| 2747 | Q85KX8           | 2                    | 20             | 32.2                  | 227    | 25575 | 4.8  | Cytochrome oxidase subunit II                                                                                                          |
| 2748 | Q15714           | 2                    | 5              | 31.2                  | 144    | 15680 | 5.2  | TSC22 domain family protein 1                                                                                                          |
| 2749 | Q9HB72           | 2                    | 4              | 30.3                  | 76     | 8468  | 10.2 | PNAS-106                                                                                                                               |
| 2749 | Q9Y5V0           | 2                    | 4              | 30.3                  | 76     | 8498  | 10   | Zinc finger protein 706                                                                                                                |
| 2750 | UPI000006FE7A    | 2                    | 2              | 30.1                  | 156    | 17967 | 9.5  | PREDICTED: similar to ubiquitin and ribosomal protein S27a precursor                                                                   |
| 2751 | UPI0000DD7A6C    | 2                    | 2              | 30.1                  | 73     | 8254  | 8.4  | PREDICTED: similar to ATP synthase alpha chain, mitochondrial precursor                                                                |
| 2752 | P62875           | 2                    | 3              | 29.9                  | 67     | 7645  | 7.8  | DNA-directed RNA polymerase II 7.6 kDa polypeptide                                                                                     |
| 2753 | Q6FG99           | 2                    | 15             | 29.8                  | 114    | 11568 | 4.4  | RPLP1 protein                                                                                                                          |
| 2754 | Q9NSA3           | 2                    | 2              | 29.6                  | 81     | 9170  | 5.4  | Beta-catenin-interacting protein 1                                                                                                     |
| 2755 | Q13015           | 2                    | 5              | 28.9                  | 90     | 10061 | 4.5  | Protein AF1q                                                                                                                           |
| 2756 | Q5EBL8           | 2                    | 4              | 28.6                  | 140    | 16131 | 7.2  | PDZ domain-containing protein 11                                                                                                       |
| 2756 | Q5EBL8-2         | 2                    | 4              | 23.4                  | 171    | 19492 | 7.6  | Isoform 2 of Q5EBL8                                                                                                                    |
| 2757 | Q5T123           | 2                    | 33             | 28.4                  | 88     | 9380  | 9.4  | SH3 domain binding glutamic acid-rich protein like 3                                                                                   |
| 2757 | Q9H299           | 2                    | 33             | 26.9                  | 93     | 10438 | 4.9  | SH3 domain-binding glutamic acid-rich-like protein 3                                                                                   |
| 2757 | UPI0000D61E9C    | 2                    | 33             | 11.1                  | 225    | 23699 | 9.1  | SH3 domain-binding glutamic acid-rich-like protein 3 (SH3 domain-binding protein 1) (SH3BP-1).                                         |
| 2757 | Q86Z22           | 2                    | 33             | 11.1                  | 226    | 23838 | 9.1  | Hypothetical protein                                                                                                                   |
| 2758 | O14907           | 2                    | 8              | 28.2                  | 124    | 13735 | 8.5  | Tax1-binding protein 3                                                                                                                 |
| 2759 | Q8NDD5           | 2                    | 4              | 35.9                  | 128    | 14098 | 5.9  | Hypothetical protein DKFZp586L2318                                                                                                     |
| 2759 | UPI00001B5789    | 2                    | 4              | 33.6                  | 137    | 15614 | 4.6  | ubiquitin-conjugating enzyme E2G 2 isoform 2                                                                                           |
| 2759 | P60604           | 2                    | 4              | 27.9                  | 165    | 18566 | 4.7  | Ubiquitin-conjugating enzyme E2 G2                                                                                                     |
| 2760 | P14406           | 2                    | 5              | 27.7                  | 83     | 9396  | 9.7  | Cytochrome c oxidase polypeptide VIIa-liver/heart, mitochondrial precursor                                                             |
| 2760 | Q49610           | 2                    | 5              | 27.7                  | 83     | 9426  | 9.6  | Cytochrome c oxidase subunit VIIa polypeptide 2                                                                                        |
| 2760 | UPI000015A446    | 2                    | 5              | 20                    | 115    | 12844 | 9.1  | Cytochrome c oxidase polypeptide VIIa-liver/heart, mitochondrial precursor (EC 1.9.3.1) (Cytochrome c oxidase subunit VIIa-L) (VIIaL). |
| 2761 | Q567R0           | 2                    | 6              | 29.4                  | 85     | 9953  | 5.5  | UQCRH protein                                                                                                                          |
| 2761 | P07919           | 2                    | 6              | 27.5                  | 91     | 10739 | 4.4  | Ubiquinol-cytochrome c reductase complex 11 kDa protein, mitochondrial precursor                                                       |
| 2762 | UPI0000DD7D46    | 2                    | 8              | 27.3                  | 77     | 7941  | 8.4  | PREDICTED: similar to ribosomal protein S14                                                                                            |
| 2763 | Q5SQX9           | 2                    | 5              | 27.6                  | 435    | 48726 | 5.1  | Novel protein similar to beta-tubulin 4Q                                                                                               |
| 2763 | Q3ZCM7           | 2                    | 5              | 27.2                  | 441    | 49360 | 4.9  | TUBB8 protein                                                                                                                          |
| 2763 | Q8WZ78           | 2                    | 5              | 27                    | 444    | 49776 | 4.9  | Beta-tubulin 4Q                                                                                                                        |
| 2764 | Q86XF3           | 2                    | 13             | 38.8                  | 67     | 7371  | 4.9  | LSM8 protein                                                                                                                           |
| 2764 | Q95777           | 2                    | 13             | 27.1                  | 96     | 10403 | 4.5  | U6 snRNA-associated Sm-like protein LSM8                                                                                               |
| 2765 | P10301           | 2                    | 8              | 27.1                  | 218    | 23480 | 6.9  | Ras-related protein R-Ras precursor                                                                                                    |
| 2766 | Q9Y605           | 2                    | 2              | 26.8                  | 127    | 14650 | 4.7  | MORF4 family-associated protein 1                                                                                                      |
| 2767 | Q9NRP2           | 2                    | 2              | 26.6                  | 79     | 9460  | 7.9  | UPF0287 protein C16orf61                                                                                                               |
| 2768 | Q9Y6A9           | 2                    | 6              | 26.5                  | 102    | 11805 | 9.3  | Signal peptidase complex subunit 1                                                                                                     |
| 2769 | Q969Q0           | 2                    | 6              | 26.4                  | 106    | 12469 | 10.7 | 60S ribosomal protein L36a-like                                                                                                        |
| 2770 | Q9UHA2           | 2                    | 2              | 26                    | 77     | 8835  | 5.9  | SS18-like protein 2                                                                                                                    |
| 2771 | O95716           | 2                    | 3              | 25.6                  | 219    | 24267 | 4.9  | Ras-related protein Rab-3D                                                                                                             |
| 2772 | Q49B96           | 2                    | 3              | 25.6                  | 90     | 10394 | 8.7  | Cytochrome c oxidase assembly protein COX19                                                                                            |
| 2773 | UPI000041A257    | 2                    | 108            | 43.6                  | 55     | 6295  | 8.9  | ATP synthase, H <sup>+</sup> transporting, mitochondrial F0 complex, subunit F2 isoform 2c                                             |
| 2773 | P56134-2         | 2                    | 108            | 27.3                  | 88     | 10363 | 9.9  | Isoform 2 of P56134                                                                                                                    |
| 2773 | P56134           | 2                    | 108            | 25.5                  | 94     | 10918 | 9.7  | ATP synthase f chain, mitochondrial                                                                                                    |
| 2774 | Q0VGL1           | 2                    | 6              | 25.3                  | 99     | 10741 | 6.5  | Similar to CG14977-PA                                                                                                                  |
| 2775 | Q13636           | 2                    | 3              | 25.3                  | 194    | 21569 | 7.1  | Ras-related protein Rab-31                                                                                                             |
| 2775 | UPI00000729DB    | 2                    | 3              | 25.1                  | 195    | 21700 | 7.1  | RAB31, member RAS oncogene family                                                                                                      |
| 2775 | Q53EY4           | 2                    | 3              | 25.1                  | 195    | 21686 | 7.1  | RAB31, member RAS oncogene family variant                                                                                              |
| 2776 | Q9C005           | 2                    | 7              | 25.3                  | 99     | 11250 | 4.9  | Dpy-30-like protein                                                                                                                    |
| 2777 | P62304           | 2                    | 28             | 25                    | 92     | 10804 | 9.4  | Small nuclear ribonucleoprotein E                                                                                                      |
| 2778 | Q49AN9           | 2                    | 17             | 29.7                  | 64     | 7101  | 7.2  | SNRPG protein                                                                                                                          |
| 2778 | P62308           | 2                    | 17             | 25                    | 76     | 8496  | 8.9  | Small nuclear ribonucleoprotein G                                                                                                      |

| No.  | Accession Number | Unique Peptide Count | Spectrum Count | Sequence Coverage (%) | Length | MolWt | pI   | Descriptive Name                                                                                                                                             |
|------|------------------|----------------------|----------------|-----------------------|--------|-------|------|--------------------------------------------------------------------------------------------------------------------------------------------------------------|
| 2779 | Q8TBQ9           | 2                    | 36             | 25                    | 72     | 8060  | 9    | Transmembrane protein 167 precursor                                                                                                                          |
| 2780 | P63172           | 2                    | 10             | 24.8                  | 113    | 12452 | 5.1  | Dynein light chain Tctex-type 1                                                                                                                              |
| 2781 | O15155           | 2                    | 8              | 24.6                  | 118    | 13289 | 9.1  | BET1 homolog                                                                                                                                                 |
| 2782 | Q96DE5           | 2                    | 3              | 24.5                  | 110    | 11667 | 5    | Uncharacterized protein C10orf104                                                                                                                            |
| 2783 | UPI0000470B2C    | 2                    | 5              | 24.8                  | 125    | 14703 | 10.9 | 39S ribosomal protein L55, mitochondrial precursor (L55mt) (MRP-L55).                                                                                        |
| 2783 | Q7Z7F7           | 2                    | 5              | 24.2                  | 128    | 15128 | 11.2 | 39S ribosomal protein L55, mitochondrial precursor                                                                                                           |
| 2783 | Q7Z7F7-2         | 2                    | 5              | 18.9                  | 164    | 18903 | 11   | Isoform 2 of Q7Z7F7                                                                                                                                          |
| 2784 | UPI000066D9CA    | 2                    | 2              | 26.7                  | 90     | 9536  | 9.1  | Nonhistone chromosomal protein HMG-14 (High-mobility group nucleosome-binding domain-containing protein 1).                                                  |
| 2784 | UPI000013E8E4    | 2                    | 2              | 26.7                  | 90     | 9561  | 9.4  | UPI000013E8E4 UniRef100 entry                                                                                                                                |
| 2784 | P05114           | 2                    | 2              | 24                    | 100    | 10659 | 9.6  | Nonhistone chromosomal protein HMG-14                                                                                                                        |
| 2784 | UPI00001AEDD6    | 2                    | 2              | 24                    | 100    | 10659 | 9.5  | PREDICTED: similar to Nonhistone chromosomal protein HMG-14 (High-mobility group nucleosome-binding domain-containing protein 1)                             |
| 2784 | Q6NSG7           | 2                    | 2              | 24                    | 100    | 10689 | 9.6  | High-mobility group nucleosome binding domain 1                                                                                                              |
| 2784 | Q3B790           | 2                    | 2              | 24                    | 100    | 10675 | 9.5  | High-mobility group nucleosome binding domain 1                                                                                                              |
| 2784 | UPI0000206EC6    | 2                    | 2              | 20.7                  | 116    | 12435 | 9.4  | Nonhistone chromosomal protein HMG-14 (High-mobility group nucleosome-binding domain-containing protein 1).                                                  |
| 2784 | UPI0000DD82D7    | 2                    | 2              | 14.2                  | 169    | 17681 | 10   | PREDICTED: similar to Nonhistone chromosomal protein HMG-14 (High-mobility group nucleosome-binding domain-containing protein 1)                             |
| 2785 | Q96F85           | 2                    | 2              | 23.8                  | 164    | 18648 | 8    | Uncharacterized protein C2orf32                                                                                                                              |
| 2786 | Q9NPA8           | 2                    | 4              | 23.8                  | 101    | 11529 | 9.3  | Enhancer of yellow 2 homolog                                                                                                                                 |
| 2786 | UPI0000503EA4    | 2                    | 4              | 23.8                  | 101    | 11526 | 9.3  | enhancer of yellow 2 homolog                                                                                                                                 |
| 2787 | P23297           | 2                    | 16             | 23.4                  | 94     | 10546 | 4.5  | Protein S100-A1                                                                                                                                              |
| 2787 | Q5T7Y6           | 2                    | 16             | 15                    | 147    | 15895 | 4.5  | S100 calcium binding protein A1                                                                                                                              |
| 2788 | P51808           | 2                    | 6              | 23.3                  | 116    | 13062 | 5.7  | Dynein light chain Tctex-type 3                                                                                                                              |
| 2788 | UPI0000211E80    | 2                    | 6              | 17.8                  | 152    | 16979 | 5.9  | Dynein light chain Tctex-type 3 (T-complex-associated testis-expressed 1-like) (Protein 91/23).                                                              |
| 2789 | UPI000013CABC    | 2                    | 14             | 23.2                  | 164    | 18111 | 6.9  | PREDICTED: similar to peptidylprolyl isomerase A isoform 1                                                                                                   |
| 2790 | P10114           | 2                    | 8              | 23                    | 183    | 20615 | 4.8  | Ras-related protein Rap-2a precursor                                                                                                                         |
| 2791 | P82921           | 2                    | 4              | 23                    | 87     | 10742 | 10.2 | Mitochondrial 28S ribosomal protein S21                                                                                                                      |
| 2792 | Q9Y3L5           | 2                    | 5              | 23                    | 183    | 20745 | 4.9  | Ras-related protein Rap-2c precursor                                                                                                                         |
| 2793 | Q8WW01           | 2                    | 3              | 22.8                  | 171    | 18641 | 4.6  | tRNA-splicing endonuclease subunit Sen15                                                                                                                     |
| 2794 | P17096           | 2                    | 11             | 22.4                  | 107    | 11676 | 10.3 | High mobility group protein HMG-I/HMG-Y (HMG-I(Y)) (High mobility group AT-hook protein 1) (High mobility group protein A1) (High mobility group protein-R). |
| 2794 | UPI0000D6142E    | 2                    | 11             | 13.4                  | 179    | 19552 | 11.6 | High mobility group protein HMG-I/HMG-Y (HMG-I(Y)) (High mobility group AT-hook protein 1) (High mobility group protein A1) (High mobility group protein-R). |
| 2794 | P17096-3         | 2                    | 11             | 13.4                  | 179    | 19694 | 11.7 | Isoform HMG                                                                                                                                                  |
| 2795 | P20339           | 2                    | 3              | 22.3                  | 215    | 23659 | 8.1  | Ras-related protein Rab-5A                                                                                                                                   |
| 2796 | Q9H0N5           | 2                    | 3              | 22.3                  | 103    | 11761 | 7.6  | Pterin-4-alpha-carbinolamine dehydratase 2                                                                                                                   |
| 2796 | UPI000013F545    | 2                    | 3              | 17.7                  | 130    | 14365 | 9.1  | pterin-4 alpha-carbinolamine dehydratase 2                                                                                                                   |
| 2797 | Q5JVG7           | 2                    | 4              | 22.2                  | 72     | 8839  | 9.2  | Hypothetical protein DKFZp566O173                                                                                                                            |
| 2797 | Q9Y6M9           | 2                    | 4              | 8.9                   | 179    | 21831 | 8.4  | NADH dehydrogenase [ubiquinone] 1 beta subcomplex subunit 9                                                                                                  |
| 2798 | A2IDD8           | 2                    | 8              | 22.1                  | 140    | 16241 | 6.6  | Vesicle-associated membrane protein 4                                                                                                                        |
| 2798 | O75379           | 2                    | 8              | 22                    | 141    | 16397 | 7.4  | Vesicle-associated membrane protein 4                                                                                                                        |
| 2799 | P61457           | 2                    | 2              | 22.1                  | 104    | 12000 | 6.8  | Pterin-4-alpha-carbinolamine dehydratase                                                                                                                     |
| 2799 | Q6FGB3           | 2                    | 2              | 22.1                  | 104    | 12010 | 6.8  | PCBD protein                                                                                                                                                 |
| 2800 | Q9UK76           | 2                    | 4              | 22.1                  | 154    | 16015 | 5.6  | Hematological and neurological expressed 1 protein                                                                                                           |
| 2800 | UPI0000456B01    | 2                    | 4              | 22.1                  | 154    | 16080 | 8.5  | Hematological and neurological expressed 1 protein (Androgen-regulated protein 2).                                                                           |
| 2800 | Q9UK76-2         | 2                    | 4              | 18.8                  | 181    | 19916 | 8.3  | Isoform 2 of Q9UK76                                                                                                                                          |
| 2801 | Q5RI15           | 2                    | 7              | 22                    | 118    | 13291 | 8.8  | Protein FAM36A                                                                                                                                               |
| 2801 | Q5RI15-2         | 2                    | 7              | 20                    | 130    | 14669 | 8.8  | Isoform 2 of Q5RI15                                                                                                                                          |
| 2802 | O15514           | 2                    | 3              | 21.8                  | 142    | 16311 | 4.8  | DNA-directed RNA polymerase II 16 kDa polypeptide                                                                                                            |
| 2803 | Q9Y6G3           | 2                    | 7              | 21.8                  | 142    | 16661 | 8.4  | Mitochondrial 28S ribosomal protein S32, mitochondrial precursor                                                                                             |
| 2803 | UPI000016020B    | 2                    | 7              | 21.8                  | 142    | 16602 | 7    | mitochondrial ribosomal protein L42 isoform b                                                                                                                |
| 2804 | P33947           | 2                    | 15             | 21.7                  | 212    | 24422 | 8.7  | ER lumen protein retaining receptor 2                                                                                                                        |
| 2805 | Q5QPM4           | 2                    | 7              | 21.7                  | 106    | 11487 | 10.4 | Proteasome (Prosome, macropain) inhibitor subunit 1                                                                                                          |
| 2805 | UPI0000D61016    | 2                    | 7              | 13.9                  | 165    | 18335 | 6.3  | Proteasome inhibitor PI31 subunit (hPI31).                                                                                                                   |
| 2805 | UPI000006D075    | 2                    | 7              | 10.4                  | 222    | 24393 | 10.2 | Proteasome inhibitor PI31 subunit (hPI31).                                                                                                                   |
| 2805 | Q5QPM7           | 2                    | 7              | 8.7                   | 263    | 28957 | 6.4  | Proteasome (Prosome, macropain) inhibitor subunit 1                                                                                                          |
| 2805 | UPI000013279C    | 2                    | 7              | 8.5                   | 271    | 29773 | 5.7  | proteasome inhibitor subunit 1 isoform 1                                                                                                                     |
| 2805 | Q92530           | 2                    | 7              | 8.5                   | 271    | 29817 | 5.7  | Proteasome inhibitor PI31 subunit                                                                                                                            |
| 2806 | Q9Y5J9           | 2                    | 5              | 21.7                  | 83     | 9344  | 5.1  | Mitochondrial import inner membrane translocase subunit Tim8 B                                                                                               |
| 2807 | P14649           | 2                    | 2              | 21.6                  | 208    | 22764 | 5.7  | Myosin light polypeptide 6B                                                                                                                                  |
| 2808 | P62699           | 2                    | 4              | 21.5                  | 121    | 13842 | 7.3  | Protein yippee-like 5                                                                                                                                        |

| No.  | Accession Number | Unique Peptide Count | Spectrum Count | Sequence Coverage (%) | Length | MolWt  | pI   | Descriptive Name                                                                                                                                                                |
|------|------------------|----------------------|----------------|-----------------------|--------|--------|------|---------------------------------------------------------------------------------------------------------------------------------------------------------------------------------|
| 2809 | UPI00006C034D    | 2                    | 2              | 21.5                  | 293    | 32072  | 5.4  | PREDICTED: similar to Heterogeneous nuclear ribonucleoprotein C-like 1 (hnRNP core protein C-like 1)                                                                            |
| 2810 | Q53TK7           | 2                    | 6              | 34.4                  | 61     | 6700   | 8.2  | Hypothetical protein ACYP2                                                                                                                                                      |
| 2810 | P00820           | 2                    | 6              | 21.2                  | 99     | 10992  | 9.6  | Acylphosphatase-2                                                                                                                                                               |
| 2810 | P14621           | 2                    | 6              | 21.2                  | 99     | 11140  | 9.5  | Acylphosphatase-2                                                                                                                                                               |
| 2811 | P60891           | 2                    | 4              | 20.8                  | 318    | 34834  | 7    | Ribose-phosphate pyrophosphokinase I                                                                                                                                            |
| 2811 | Q53FW2           | 2                    | 4              | 20.8                  | 318    | 34864  | 6.8  | Phosphoribosyl pyrophosphate synthetase 1 variant                                                                                                                               |
| 2812 | P13929           | 2                    | 32             | 20.7                  | 434    | 46987  | 7.7  | Beta-enolase                                                                                                                                                                    |
| 2812 | UPI0000169F85    | 2                    | 32             | 20.7                  | 434    | 46932  | 7.7  | Beta-enolase (EC 4.2.1.11) (2-phospho-D-glycerate hydro-lyase) (Muscle-specific enolase) (MSE) (Skeletal muscle enolase) (Enolase 3).                                           |
| 2812 | UPI0000161C26    | 2                    | 32             | 20.7                  | 434    | 46959  | 7.7  | enolase 3                                                                                                                                                                       |
| 2813 | UPI0000457013    | 2                    | 5              | 21.9                  | 319    | 33784  | 8.7  | Poly(rC)-binding protein 3 (Alpha-CP3).                                                                                                                                         |
| 2813 | P57721-5         | 2                    | 5              | 21.9                  | 319    | 33814  | 8.5  | Isoform 5 of P57721                                                                                                                                                             |
| 2813 | P57721-4         | 2                    | 5              | 20.7                  | 338    | 35810  | 8.1  | Isoform 4 of P57721                                                                                                                                                             |
| 2813 | P57721           | 2                    | 5              | 20.6                  | 339    | 35938  | 8.1  | Poly(rC)-binding protein 3                                                                                                                                                      |
| 2813 | Q5MJP6           | 2                    | 5              | 19.4                  | 361    | 38153  | 8.1  | Poly(RC) binding protein 3                                                                                                                                                      |
| 2814 | Q3MHD2           | 2                    | 5              | 20.6                  | 131    | 14328  | 5.9  | LSM12 protein                                                                                                                                                                   |
| 2814 | Q96NL5           | 2                    | 5              | 13.8                  | 195    | 21701  | 7.8  | CDNA FLJ30656 fis, clone DFNES2000292                                                                                                                                           |
| 2815 | P55854           | 2                    | 23             | 20.4                  | 103    | 11637  | 5.5  | Small ubiquitin-related modifier 3 precursor                                                                                                                                    |
| 2816 | Q9NZ45           | 2                    | 4              | 20.4                  | 108    | 12199  | 9.1  | Zinc finger CDGSH domain-containing protein 1                                                                                                                                   |
| 2817 | O14519           | 2                    | 7              | 20                    | 115    | 12365  | 9.4  | Cyclin-dependent kinase 2-associated protein 1                                                                                                                                  |
| 2818 | Q9BTT4           | 2                    | 3              | 20                    | 135    | 15688  | 6.2  | Mediator of RNA polymerase II transcription, subunit 10 homolog                                                                                                                 |
| 2819 | Q9BV81           | 2                    | 3              | 20                    | 110    | 12017  | 10.1 | Transmembrane protein 93                                                                                                                                                        |
| 2820 | P11234           | 2                    | 3              | 19.9                  | 206    | 23409  | 6.6  | Ras-related protein Ral-B precursor                                                                                                                                             |
| 2820 | Q6ZS74           | 2                    | 3              | 18.1                  | 227    | 25710  | 8.7  | CDNA FLJ45773 fis, clone NETRP2003448, highly similar to Ras-related protein RAL-B                                                                                              |
| 2821 | Q9UQL0           | 2                    | 3              | 26.6                  | 109    | 12463  | 7.9  | Ubiquitin-conjugating enzyme 1 isoform                                                                                                                                          |
| 2821 | UPI0000D60F6C    | 2                    | 3              | 19.9                  | 146    | 16490  | 8.1  | Ubiquitin-conjugating enzyme E2 D1 (EC 6.3.2.19) (Ubiquitin-protein ligase D1) (Ubiquitin carrier protein D1) (UbcH5) (Ubiquitin- conjugating enzyme E2-17 kDa 1) (E2(17)KB 1). |
| 2821 | P51668           | 2                    | 3              | 19.7                  | 147    | 16602  | 7.4  | Ubiquitin-conjugating enzyme E2 D1 (EC 6.3.2.19) (Ubiquitin-protein ligase D1) (Ubiquitin carrier protein D1) (UbcH5) (Ubiquitin- conjugating enzyme E2-17 kDa 1) (E2(17)KB 1)  |
| 2821 | Q9Y2X8           | 2                    | 3              | 19.7                  | 147    | 16649  | 7.4  | Ubiquitin-conjugating enzyme E2 D4                                                                                                                                              |
| 2822 | Q6P5R6           | 2                    | 7              | 19.7                  | 122    | 14606  | 9.4  | Ribosomal protein L22-like 1                                                                                                                                                    |
| 2823 | P35609           | 2                    | 24             | 19.6                  | 894    | 103854 | 5.5  | Alpha-actinin-2                                                                                                                                                                 |
| 2824 | O95139           | 2                    | 5              | 19.5                  | 128    | 15489  | 9.6  | NADH dehydrogenase [ubiquinone] 1 beta subcomplex subunit 6                                                                                                                     |
| 2825 | Q9P2X0           | 2                    | 10             | 23.9                  | 92     | 10094  | 5.9  | Dolichol-phosphate mannosyltransferase subunit 3                                                                                                                                |
| 2825 | Q6P184           | 2                    | 10             | 20.8                  | 106    | 11564  | 6    | DPM3 protein                                                                                                                                                                    |
| 2825 | Q3SX58           | 2                    | 10             | 19.5                  | 113    | 12339  | 6    | DPM3 protein                                                                                                                                                                    |
| 2826 | O14966           | 2                    | 2              | 19.2                  | 203    | 23155  | 7.2  | Ras-related protein Rab-7L1                                                                                                                                                     |
| 2826 | Q53EX5           | 2                    | 2              | 19.2                  | 203    | 23139  | 7.2  | RAB7, member RAS oncogene family-like 1 variant                                                                                                                                 |
| 2827 | P18077           | 2                    | 17             | 19.1                  | 110    | 12538  | 11.1 | 60S ribosomal protein L35a                                                                                                                                                      |
| 2828 | Q96IX5           | 2                    | 10             | 19                    | 58     | 6458   | 9.8  | Up-regulated during skeletal muscle growth protein 5                                                                                                                            |
| 2828 | UPI00001618AA    | 2                    | 10             | 19                    | 58     | 6617   | 9.9  | UPI00001618AA UniRef100 entry                                                                                                                                                   |
| 2829 | UPI00001AE467    | 2                    | 6              | 20.6                  | 102    | 11138  | 7.3  | blocked early in transport 1 homolog (S. cerevisiae) like                                                                                                                       |
| 2829 | Q9NYM9           | 2                    | 6              | 18.9                  | 111    | 12388  | 8.2  | BET1-like protein                                                                                                                                                               |
| 2830 | UPI0000DD7B6E    | 2                    | 32             | 33.3                  | 72     | 8132   | 11.1 | PREDICTED: similar to 60S ribosomal protein L22 (Heparin-binding protein HBp15)                                                                                                 |
| 2830 | P35268           | 2                    | 32             | 18.8                  | 128    | 14787  | 9.2  | 60S ribosomal protein L22                                                                                                                                                       |
| 2830 | Q7Z4W8           | 2                    | 32             | 18.8                  | 128    | 14818  | 9.3  | Heparin-binding protein HBp15                                                                                                                                                   |
| 2831 | Q9BQ61           | 2                    | 5              | 18.8                  | 176    | 18419  | 9.4  | Uncharacterized protein C19orf43                                                                                                                                                |
| 2832 | P14854           | 2                    | 11             | 18.6                  | 86     | 10192  | 7    | Cytochrome c oxidase subunit VIb isoform 1                                                                                                                                      |
| 2833 | P29777           | 2                    | 2              | 18.6                  | 354    | 40087  | 5.9  | Guanine nucleotide-binding protein G(o) subunit alpha 2                                                                                                                         |
| 2833 | UPI000016A9CA    | 2                    | 2              | 18.6                  | 354    | 40073  | 5.9  | guanine nucleotide binding protein, alpha activating polypeptide O                                                                                                              |
| 2834 | P62861           | 2                    | 15             | 18.6                  | 59     | 6648   | 12.1 | 40S ribosomal protein S30                                                                                                                                                       |
| 2835 | Q02539           | 2                    | 5              | 18.6                  | 215    | 21842  | 11   | Histone H1.1                                                                                                                                                                    |
| 2836 | UPI000016062E    | 2                    | 2              | 18.6                  | 118    | 12951  | 9.6  | PREDICTED: similar to BC003940 protein                                                                                                                                          |
| 2837 | P01034           | 2                    | 3              | 18.5                  | 146    | 15799  | 8.8  | Cystatin-C precursor                                                                                                                                                            |
| 2838 | Q9HAV0           | 2                    | 3              | 18.5                  | 340    | 37567  | 6    | Guanine nucleotide-binding protein subunit beta 4                                                                                                                               |
| 2839 | Q96A48           | 2                    | 2              | 18.3                  | 142    | 15397  | 10.6 | FKSG19                                                                                                                                                                          |
| 2840 | Q9BRT3           | 2                    | 2              | 18.3                  | 115    | 12403  | 4.4  | Uncharacterized protein C17orf37                                                                                                                                                |
| 2841 | Q96A26           | 2                    | 8              | 18.2                  | 154    | 17342  | 9.8  | E2-induced gene 5 protein                                                                                                                                                       |
| 2842 | O43573           | 2                    | 2              | 17.9                  | 134    | 14780  | 9.7  | Methylmalonate semialdehyde dehydrogenase precursor                                                                                                                             |
| 2842 | Q53H94           | 2                    | 2              | 4.5                   | 535    | 57826  | 8.5  | Aldehyde dehydrogenase 6A1 variant                                                                                                                                              |
| 2842 | Q53FN8           | 2                    | 2              | 4.5                   | 535    | 57967  | 8.6  | Aldehyde dehydrogenase 6A1 variant                                                                                                                                              |
| 2842 | Q02252           | 2                    | 2              | 4.5                   | 535    | 57840  | 8.5  | Methylmalonate-semialdehyde dehydrogenase [acylating], mitochondrial precursor                                                                                                  |

| No.  | Accession Number | Unique Peptide Count | Spectrum Count | Sequence Coverage (%) | Length | MolWt | pI   | Descriptive Name                                                                                                                                                                                                                     |
|------|------------------|----------------------|----------------|-----------------------|--------|-------|------|--------------------------------------------------------------------------------------------------------------------------------------------------------------------------------------------------------------------------------------|
| 2843 | Q9GZM3           | 2                    | 4              | 18.3                  | 115    | 13074 | 6.3  | RPB11b1alpha protein                                                                                                                                                                                                                 |
| 2843 | P52435           | 2                    | 4              | 17.9                  | 117    | 13293 | 5.9  | DNA-directed RNA polymerase II subunit J                                                                                                                                                                                             |
| 2843 | Q9H1A6           | 2                    | 4              | 16.5                  | 127    | 14131 | 5.9  | RPB11a protein                                                                                                                                                                                                                       |
| 2843 | QOVGM6           | 2                    | 4              | 15.2                  | 138    | 15027 | 6.9  | MGC13098 protein                                                                                                                                                                                                                     |
| 2843 | Q8IZ67           | 2                    | 4              | 13.1                  | 160    | 17172 | 6.9  | MGC13098 protein                                                                                                                                                                                                                     |
| 2843 | UPI0000D61CA1    | 2                    | 4              | 11.8                  | 178    | 18673 | 6.2  | DNA-directed RNA polymerase II subunit J (EC 2.7.7.6) (DNA-directed RNA polymerase II 13.3 kDa polypeptide) (RPB11).                                                                                                                 |
| 2843 | Q6PJD2           | 2                    | 4              | 11.7                  | 179    | 18885 | 6.4  | MGC13098 protein                                                                                                                                                                                                                     |
| 2843 | Q59FR2           | 2                    | 4              | 11.7                  | 180    | 19038 | 6.7  | MGC13098 protein variant                                                                                                                                                                                                             |
| 2844 | Q9NR33           | 2                    | 4              | 17.9                  | 117    | 12209 | 4.9  | DNA polymerase epsilon subunit 4                                                                                                                                                                                                     |
| 2845 | O14880           | 2                    | 23             | 17.8                  | 152    | 16516 | 9.4  | Microsomal glutathione S-transferase 3                                                                                                                                                                                               |
| 2845 | Q53GB9           | 2                    | 23             | 17.8                  | 152    | 16530 | 9.4  | Microsomal glutathione S-transferase 3 variant                                                                                                                                                                                       |
| 2846 | Q75M90           | 2                    | 2              | 17.7                  | 113    | 12749 | 10.1 | Hypothetical protein HSPC268                                                                                                                                                                                                         |
| 2846 | Q96HJ9           | 2                    | 2              | 17.7                  | 113    | 12733 | 10.1 | Hypothetical protein HSPC268                                                                                                                                                                                                         |
| 2847 | Q9Y244           | 2                    | 3              | 17.7                  | 141    | 15789 | 5.1  | Proteasome maturation protein                                                                                                                                                                                                        |
| 2847 | UPI0000D61A56    | 2                    | 3              | 15.6                  | 160    | 18042 | 4.9  | Proteasome maturation protein (Proteasemblin) (Protein UMP1 homolog) (hUMP1) (Voltage-gated K channel beta subunit 4.1).                                                                                                             |
| 2848 | P78537           | 2                    | 4              | 17.6                  | 125    | 14311 | 8.2  | Biogenesis of lysosome-related organelles complex-1 subunit 1                                                                                                                                                                        |
| 2849 | UPI00001D7C91    | 2                    | 2              | 17.6                  | 262    | 28060 | 8.9  | UPI00001D7C91 UniRef100 entry                                                                                                                                                                                                        |
| 2850 | Q7Z3H5           | 2                    | 3              | 20.4                  | 323    | 37501 | 7.1  | Hypothetical protein DKFZp686O0215                                                                                                                                                                                                   |
| 2850 | UPI0000140DA1    | 2                    | 3              | 19.7                  | 335    | 38275 | 6.2  | Mitogen-activated protein kinase 3 (EC 2.7.11.24) (Extracellular signal-regulated kinase 1) (ERK-1) (Insulin-stimulated MAP2 kinase) (MAP kinase 1) (MAPK 1) (p44-ERK1) (ERT2) (p44-MAPK) (Microtubule-associated protein 2 kinase). |
| 2850 | UPI0000D579B4    | 2                    | 3              | 18.5                  | 357    | 40088 | 7.5  | mitogen-activated protein kinase 3 isoform 2                                                                                                                                                                                         |
| 2850 | P27361           | 2                    | 3              | 17.4                  | 379    | 43136 | 6.8  | Mitogen-activated protein kinase 3                                                                                                                                                                                                   |
| 2851 | Q6QN92           | 2                    | 3              | 24                    | 125    | 13813 | 4.3  | Mitochondrial glycine cleavage system H-protein                                                                                                                                                                                      |
| 2851 | P23434           | 2                    | 3              | 17.3                  | 173    | 18911 | 4.9  | Glycine cleavage system H protein, mitochondrial precursor                                                                                                                                                                           |
| 2851 | UPI000013FAFB    | 2                    | 3              | 17.3                  | 173    | 18885 | 4.9  | glycine cleavage system protein H (aminomethyl carrier)                                                                                                                                                                              |
| 2851 | Q6IAT2           | 2                    | 3              | 17.3                  | 173    | 19026 | 4.9  | GCSH protein                                                                                                                                                                                                                         |
| 2852 | Q9H7C9           | 2                    | 4              | 17.2                  | 122    | 13332 | 8.4  | UPF0366 protein C11orf67                                                                                                                                                                                                             |
| 2853 | Q6ZSR9           | 2                    | 4              | 17.1                  | 216    | 23110 | 8.4  | CDNA FLJ45252 fis, clone BRHIP2011199                                                                                                                                                                                                |
| 2854 | Q9Y3C4-2         | 2                    | 4              | 21.1                  | 142    | 16093 | 6.3  | Isoform 2 of Q9Y3C4                                                                                                                                                                                                                  |
| 2854 | Q9Y3C4           | 2                    | 4              | 17.1                  | 175    | 19661 | 6.8  | TP53RK-binding protein                                                                                                                                                                                                               |
| 2854 | Q9Y3C4-3         | 2                    | 4              | 14                    | 214    | 23854 | 7.4  | Isoform 3 of Q9Y3C4                                                                                                                                                                                                                  |
| 2855 | O96007           | 2                    | 3              | 17                    | 188    | 20944 | 5.4  | Molybdenum cofactor synthesis protein 2 large subunit                                                                                                                                                                                |
| 2856 | P84101           | 2                    | 3              | 16.9                  | 59     | 6900  | 10.4 | Small EDRK-rich factor 2                                                                                                                                                                                                             |
| 2857 | Q8TCD5           | 2                    | 3              | 16.9                  | 201    | 23383 | 6.6  | 5'(3')-deoxyribonucleotidase, cytosolic type                                                                                                                                                                                         |
| 2858 | P61769           | 2                    | 26             | 16.8                  | 119    | 13715 | 6.5  | Beta-2-microglobulin precursor [Contains: Beta-2-microglobulin variant pI 5.3]                                                                                                                                                       |
| 2858 | Q6IAT8           | 2                    | 26             | 16.8                  | 119    | 13697 | 6.5  | B2M protein                                                                                                                                                                                                                          |
| 2859 | P06703           | 2                    | 66             | 16.7                  | 90     | 10180 | 5.5  | Protein S100-A6                                                                                                                                                                                                                      |
| 2860 | Q6P1L8           | 2                    | 3              | 16.6                  | 145    | 15948 | 10.2 | 39S ribosomal protein L14, mitochondrial precursor                                                                                                                                                                                   |
| 2861 | Q9BQ15           | 2                    | 2              | 16.6                  | 211    | 22338 | 9.1  | Oligonucleotide/oligosaccharide-binding fold-containing protein 2B                                                                                                                                                                   |
| 2862 | UPI0000456FC5    | 2                    | 5              | 16.5                  | 659    | 71779 | 4.9  | Opioid growth factor receptor (OGFr) (Zeta-type opioid receptor) (7-60 protein).                                                                                                                                                     |
| 2863 | P00167-2         | 2                    | 3              | 22.4                  | 98     | 11268 | 5.1  | Isoform 2 of P00167                                                                                                                                                                                                                  |
| 2863 | Q59F44           | 2                    | 3              | 16.7                  | 132    | 14572 | 5.7  | Cytochrome b-5 isoform 1 variant                                                                                                                                                                                                     |
| 2863 | P00167           | 2                    | 3              | 16.4                  | 134    | 15330 | 5    | Cytochrome b5                                                                                                                                                                                                                        |
| 2864 | Q6IAZ6           | 2                    | 6              | 16.8                  | 167    | 19608 | 5.9  | RGS10 protein                                                                                                                                                                                                                        |
| 2864 | O43665           | 2                    | 6              | 16.2                  | 173    | 20236 | 5.5  | Regulator of G-protein signaling 10                                                                                                                                                                                                  |
| 2864 | Q96GN0           | 2                    | 6              | 15.5                  | 181    | 21210 | 7.5  | Regulator of G-protein signalling 10                                                                                                                                                                                                 |
| 2865 | O43924           | 2                    | 2              | 16                    | 150    | 17420 | 5.7  | Retinal rod rhodopsin-sensitive cGMP 3',5'-cyclic phosphodiesterase subunit delta                                                                                                                                                    |
| 2866 | Q9Y5T4           | 2                    | 3              | 16                    | 150    | 16383 | 10.1 | DnaJ homolog subfamily C member 15                                                                                                                                                                                                   |
| 2867 | Q53HV0           | 2                    | 8              | 15.9                  | 346    | 38954 | 7.9  | SPFH domain family, member 1 variant                                                                                                                                                                                                 |
| 2868 | Q9NV35           | 2                    | 2              | 15.9                  | 164    | 18609 | 6.1  | Probable 7,8-dihydro-8-oxoguanine triphosphatase NUDT15                                                                                                                                                                              |
| 2869 | P61966           | 2                    | 2              | 15.8                  | 158    | 18733 | 5.7  | AP-1 complex subunit sigma-1A                                                                                                                                                                                                        |
| 2870 | Q9NPJ3           | 2                    | 5              | 15.7                  | 140    | 14960 | 9.1  | Thioesterase superfamily member 2                                                                                                                                                                                                    |
| 2871 | Q96E14           | 2                    | 3              | 15.6                  | 147    | 15865 | 7.9  | Uncharacterized protein C16orf75                                                                                                                                                                                                     |
| 2872 | Q9BY50           | 2                    | 10             | 15.6                  | 192    | 21542 | 9.2  | Signal peptidase complex catalytic subunit SEC11C                                                                                                                                                                                    |
| 2873 | UPI0000D616EE    | 2                    | 6              | 15.7                  | 102    | 11528 | 5.3  | U6 snRNA-associated Sm-like protein LSm7.                                                                                                                                                                                            |
| 2873 | Q9UK45           | 2                    | 6              | 15.5                  | 103    | 11602 | 5.3  | U6 snRNA-associated Sm-like protein LSm7                                                                                                                                                                                             |
| 2874 | Q9HD34           | 2                    | 5              | 15.4                  | 91     | 10758 | 10.7 | LYR motif-containing protein 4                                                                                                                                                                                                       |
| 2875 | UPI00006C196D    | 2                    | 26             | 15.4                  | 136    | 15556 | 10.6 | PREDICTED: similar to 60S ribosomal protein L35                                                                                                                                                                                      |
| 2876 | Q13541           | 2                    | 2              | 15.3                  | 118    | 12580 | 5.5  | Eukaryotic translation initiation factor 4E-binding protein 1                                                                                                                                                                        |
| 2877 | Q9UBK9           | 2                    | 5              | 15.3                  | 157    | 18246 | 7.6  | Protein UXT                                                                                                                                                                                                                          |
| 2878 | Q86XN0           | 2                    | 8              | 15.2                  | 145    | 15961 | 8.7  | MRPL43 protein                                                                                                                                                                                                                       |
| 2879 | Q9UBY6           | 2                    | 3              | 16.2                  | 154    | 16970 | 4.3  | Kinase-related protein isoform 2                                                                                                                                                                                                     |



| No.  | Accession Number | Unique Peptide Count | Spectrum Count | Sequence Coverage (%) | Length | MolWt  | pI   | Descriptive Name                                                                                                      |
|------|------------------|----------------------|----------------|-----------------------|--------|--------|------|-----------------------------------------------------------------------------------------------------------------------|
| 2879 | Q05B97           | 2                    | 3              | 15.1                  | 166    | 18152  | 4.4  | MYLK protein                                                                                                          |
| 2879 | Q05B98           | 2                    | 3              | 15                    | 167    | 18253  | 4.4  | MYLK protein                                                                                                          |
| 2879 | Q68DK3           | 2                    | 3              | 14.8                  | 169    | 18482  | 4.4  | Hypothetical protein DKFZp686l10125                                                                                   |
| 2879 | Q3B765           | 2                    | 3              | 11                    | 227    | 24647  | 4.5  | MYLK protein                                                                                                          |
| 2879 | Q05D81           | 2                    | 3              | 10.6                  | 236    | 25872  | 5    | MYLK protein                                                                                                          |
| 2879 | Q6ZNP1           | 2                    | 3              | 4.4                   | 572    | 62282  | 4.8  | CDNA FLJ27411 fis, clone WMC04903, highly similar to Myosin light chain kinase, smooth muscle and non-muscle isozymes |
| 2879 | UPI0000E4C8FD    | 2                    | 3              | 1.4                   | 1794   | 197398 | 6.5  | myosin light chain kinase isoform 3B                                                                                  |
| 2879 | UPI0000E4C8FC    | 2                    | 3              | 1.4                   | 1845   | 203054 | 6.2  | myosin light chain kinase isoform 2                                                                                   |
| 2879 | UPI0000D61B67    | 2                    | 3              | 1.4                   | 1842   | 202643 | 6.1  | Myosin light chain kinase, smooth muscle (EC 2.7.11.18) (MLCK) (Telokin) (Kinase-related protein) (KRP).              |
| 2879 | UPI0000457165    | 2                    | 3              | 1.4                   | 1845   | 203085 | 6.1  | Myosin light chain kinase, smooth muscle (EC 2.7.11.18) (MLCK) (Telokin) (Kinase-related protein) (KRP).              |
| 2879 | Q15746-5         | 2                    | 3              | 1.4                   | 1841   | 202568 | 6.2  | Isoform 4 of Q15746                                                                                                   |
| 2879 | Q15746-4         | 2                    | 3              | 1.4                   | 1794   | 197631 | 6.8  | Isoform 3B of Q15746                                                                                                  |
| 2879 | Q15746-2         | 2                    | 3              | 1.4                   | 1845   | 203127 | 6.2  | Isoform 2 of Q15746                                                                                                   |
| 2879 | UPI0000D61B66    | 2                    | 3              | 1.3                   | 1864   | 205349 | 6.8  | Myosin light chain kinase, smooth muscle (EC 2.7.11.18) (MLCK) (Telokin) (Kinase-related protein) (KRP).              |
| 2879 | UPI0000457163    | 2                    | 3              | 1.3                   | 1914   | 210744 | 6.1  | Myosin light chain kinase, smooth muscle (EC 2.7.11.18) (MLCK) (Telokin) (Kinase-related protein) (KRP).              |
| 2879 | UPI000020A0AE    | 2                    | 3              | 1.3                   | 1914   | 210713 | 6.2  | myosin light chain kinase isoform 1                                                                                   |
| 2879 | UPI000013E30E    | 2                    | 3              | 1.3                   | 1863   | 205057 | 6.5  | myosin light chain kinase isoform 3A                                                                                  |
| 2879 | Q15746-6         | 2                    | 3              | 1.3                   | 1913   | 210643 | 6.2  | Isoform Del                                                                                                           |
| 2879 | Q15746-3         | 2                    | 3              | 1.3                   | 1863   | 205277 | 6.8  | Isoform 3A of Q15746                                                                                                  |
| 2879 | Q15746           | 2                    | 3              | 1.3                   | 1914   | 210772 | 6.2  | Myosin light chain kinase, smooth muscle                                                                              |
| 2880 | Q9Y5J5           | 2                    | 5              | 15                    | 127    | 13891  | 9.7  | Pleckstrin homology-like domain family A member 3                                                                     |
| 2881 | P52566           | 2                    | 2              | 14.9                  | 201    | 22988  | 5.2  | Rho GDP-dissociation inhibitor 2                                                                                      |
| 2882 | Q13158           | 2                    | 2              | 14.9                  | 208    | 23279  | 5.7  | Protein FADD                                                                                                          |
| 2883 | Q5T091           | 2                    | 26             | 15.5                  | 187    | 21024  | 8.7  | RER1 retention in endoplasmic reticulum 1 homolog                                                                     |
| 2883 | O15258           | 2                    | 26             | 14.8                  | 196    | 22958  | 9.5  | Protein RER1                                                                                                          |
| 2883 | UPI000049DC68    | 2                    | 26             | 14.1                  | 205    | 23050  | 6.9  | Protein RER1.                                                                                                         |
| 2883 | UPI0000D61E27    | 2                    | 26             | 13.6                  | 213    | 24689  | 9.6  | Protein RER1.                                                                                                         |
| 2883 | Q9P0H9           | 2                    | 26             | 13.6                  | 214    | 24817  | 9.6  | RER1 protein                                                                                                          |
| 2884 | Q14353           | 2                    | 3              | 14.8                  | 236    | 26318  | 6.1  | Guanidinoacetate N-methyltransferase                                                                                  |
| 2885 | P52657           | 2                    | 10             | 14.7                  | 109    | 12457  | 6.8  | Transcription initiation factor IIA gamma chain                                                                       |
| 2886 | Q86WX3           | 2                    | 4              | 14.7                  | 136    | 15434  | 10.7 | 40S ribosomal protein S19-binding protein 1                                                                           |
| 2887 | O95989           | 2                    | 2              | 14.5                  | 172    | 19471  | 6.4  | Diphosphoinositol polyphosphate phosphohydrolase 1                                                                    |
| 2888 | UPI000015FD55    | 2                    | 24             | 14.8                  | 155    | 17219  | 11.1 | PREDICTED: similar to 60S ribosomal protein L29 (Cell surface heparin-binding protein HIP)                            |
| 2888 | P47914           | 2                    | 24             | 14.5                  | 159    | 17752  | 11.7 | 60S ribosomal protein L29                                                                                             |
| 2888 | Q6IP11           | 2                    | 24             | 14.3                  | 161    | 17951  | 11.7 | Ribosomal protein L29                                                                                                 |
| 2889 | P62487           | 2                    | 3              | 14.5                  | 172    | 19294  | 5.5  | DNA-directed RNA polymerase II 19 kDa polypeptide                                                                     |
| 2890 | P82663           | 2                    | 5              | 14.5                  | 173    | 20116  | 8.8  | Mitochondrial 28S ribosomal protein S25                                                                               |
| 2891 | Q6ZR81           | 2                    | 10             | 18.5                  | 135    | 15343  | 10.7 | CDNA FLJ46566 fis, clone THYMU3040829, moderately similar to Cold- inducible RNA-binding protein                      |
| 2891 | Q14011           | 2                    | 10             | 14.5                  | 172    | 18648  | 9.5  | Cold-inducible RNA-binding protein                                                                                    |
| 2892 | Q16674           | 2                    | 3              | 14.5                  | 131    | 14509  | 8.8  | Melanoma-derived growth regulatory protein precursor                                                                  |
| 2893 | Q5JS54           | 2                    | 6              | 14.5                  | 138    | 15196  | 6.9  | Chromosome 6 open reading frame 86                                                                                    |
| 2894 | Q8VWX9           | 2                    | 4              | 14.5                  | 145    | 16185  | 5.5  | Thioredoxin-like selenoprotein M precursor                                                                            |
| 2894 | UPI0000D62134    | 2                    | 4              | 14.5                  | 145    | 16134  | 5.6  | Thioredoxin-like selenoprotein M precursor (Protein SelM).                                                            |
| 2894 | UPI000016788A    | 2                    | 4              | 14.5                  | 145    | 16082  | 5.5  | selenoprotein M precursor                                                                                             |
| 2895 | Q92882           | 2                    | 4              | 14.5                  | 214    | 23787  | 5.7  | Osteoclast-stimulating factor 1                                                                                       |
| 2895 | UPI0000130EB3    | 2                    | 4              | 14.5                  | 214    | 23799  | 5.4  | osteoclast stimulating factor 1                                                                                       |
| 2896 | P11217           | 2                    | 2              | 14.4                  | 842    | 97092  | 7    | Glycogen phosphorylase, muscle form                                                                                   |
| 2897 | P49006           | 2                    | 9              | 14.4                  | 195    | 19529  | 4.7  | MARCKS-related protein                                                                                                |
| 2898 | O43181           | 2                    | 2              | 14.3                  | 175    | 20108  | 10.3 | NADH dehydrogenase [ubiquinone] iron-sulfur protein 4, mitochondrial precursor                                        |
| 2899 | UPI0000D624C1    | 2                    | 6              | 14.2                  | 134    | 15535  | 8.1  | Golgin subfamily A member 7 (Golgi complex-associated protein of 16 kDa).                                             |
| 2899 | Q7Z5G4-2         | 2                    | 6              | 14.2                  | 134    | 15578  | 8.4  | Isoform 2 of Q7Z5G4                                                                                                   |
| 2899 | Q7Z5G4           | 2                    | 6              | 13.9                  | 137    | 15824  | 7    | Golgin subfamily A member 7                                                                                           |
| 2900 | O15235           | 2                    | 3              | 13.8                  | 138    | 15173  | 10.3 | 28S ribosomal protein S12, mitochondrial precursor                                                                    |
| 2901 | O43598           | 2                    | 5              | 13.8                  | 174    | 19108  | 5    | c-Myc-responsive protein Rcl                                                                                          |
| 2902 | Q3ZCS0           | 2                    | 4              | 13.8                  | 189    | 21054  | 9.6  | TP53I11 protein                                                                                                       |
| 2902 | UPI00004564BB    | 2                    | 4              | 8.7                   | 298    | 32348  | 10.5 | p53-induced protein                                                                                                   |
| 2902 | Q99785           | 2                    | 4              | 8.7                   | 299    | 32373  | 10.6 | Hypothetical protein                                                                                                  |
| 2903 | Q6P161           | 2                    | 8              | 13.8                  | 138    | 15819  | 9.6  | 39S ribosomal protein 54, mitochondrial precursor                                                                     |
| 2904 | Q9Y2R5           | 2                    | 4              | 13.8                  | 130    | 14502  | 9.8  | 28S ribosomal protein S17, mitochondrial precursor                                                                    |
| 2905 | Q96EH3           | 2                    | 4              | 13.7                  | 234    | 26170  | 5.5  | Uncharacterized protein C7orf30                                                                                       |
| 2906 | Q53G08           | 2                    | 3              | 13.5                  | 185    | 21370  | 5.6  | DNA replication complex GINS protein PSF2 variant                                                                     |

| No.  | Accession Number | Unique Peptide Count | Spectrum Count | Sequence Coverage (%) | Length | MolWt | pI   | Descriptive Name                                                                                                 |
|------|------------------|----------------------|----------------|-----------------------|--------|-------|------|------------------------------------------------------------------------------------------------------------------|
| 2906 | Q9Y248           | 2                    | 3              | 13.5                  | 185    | 21428 | 5.4  | DNA replication complex GINS protein PSF2                                                                        |
| 2907 | Q5SXM8           | 2                    | 3              | 13.5                  | 178    | 19204 | 9.8  | Chromosome 9 open reading frame 151                                                                              |
| 2908 | Q6IQ22           | 2                    | 3              | 13.5                  | 244    | 27248 | 8.4  | Ras-related protein Rab-12                                                                                       |
| 2909 | A4D0R9           | 2                    | 4              | 13.4                  | 418    | 46302 | 4.9  | Protein kinase, cAMP-dependent, regulatory, type II, beta                                                        |
| 2909 | Q6DHZ2           | 2                    | 4              | 13.4                  | 418    | 46348 | 4.9  | Protein kinase, cAMP-dependent, regulatory, type II, beta                                                        |
| 2909 | P31323           | 2                    | 4              | 13.4                  | 418    | 46346 | 4.9  | cAMP-dependent protein kinase type II-beta regulatory subunit                                                    |
| 2910 | O43708           | 2                    | 4              | 13.4                  | 216    | 24182 | 8.5  | Maleylacetoacetate isomerase                                                                                     |
| 2910 | UPI000013C6F0    | 2                    | 4              | 13.4                  | 216    | 24114 | 7.7  | glutathione transferase zeta 1 isoform 1                                                                         |
| 2910 | Q6IB17           | 2                    | 4              | 13.4                  | 216    | 24083 | 8.3  | GSTZ1 protein                                                                                                    |
| 2911 | Q9NRP0           | 2                    | 33             | 13.4                  | 149    | 16829 | 9.1  | DC2                                                                                                              |
| 2911 | Q9P1R4           | 2                    | 33             | 12.5                  | 160    | 17895 | 9.5  | HDCMD45P                                                                                                         |
| 2911 | Q9P075           | 2                    | 33             | 12                    | 167    | 18667 | 9.5  | HSPC307                                                                                                          |
| 2912 | Q9BWN5           | 2                    | 2              | 14.3                  | 224    | 23195 | 8.3  | IIVB (Bacterial acetolactate synthase)-like                                                                      |
| 2912 | A1LOT0           | 2                    | 2              | 13.3                  | 241    | 25613 | 9.6  | FLJ39061 protein                                                                                                 |
| 2912 | Q59GP4           | 2                    | 2              | 7.5                   | 427    | 45645 | 8.9  | IIVB (Bacterial acetolactate synthase)-like isoform 1 variant                                                    |
| 2912 | Q99651           | 2                    | 2              | 5.1                   | 632    | 67924 | 8.1  | Acetolactate synthase homolog                                                                                    |
| 2912 | Q96F08           | 2                    | 2              | 5.1                   | 632    | 67869 | 8    | IIVB (Bacterial acetolactate synthase)-like                                                                      |
| 2912 | O43341           | 2                    | 2              | 5.1                   | 632    | 67868 | 8.1  | IIVB-like protein                                                                                                |
| 2913 | UPI0000D62162    | 2                    | 3              | 22                    | 123    | 13891 | 7    | DNA-directed RNA polymerase III subunit 22.9 kDa polypeptide (EC 2.7.7.6) (RPC8).                                |
| 2913 | UPI0000511A82    | 2                    | 3              | 22                    | 123    | 13816 | 7    | polymerase (RNA) III (DNA directed) polypeptide H (22.9kD) isoform c                                             |
| 2913 | Q9Y535           | 2                    | 3              | 13.2                  | 204    | 22918 | 4.6  | DNA-directed RNA polymerase III subunit 22.9 kDa polypeptide                                                     |
| 2914 | UPI000013EC4C    | 2                    | 11             | 13.3                  | 181    | 20792 | 9.6  | jagunal homolog 1                                                                                                |
| 2914 | Q8N5M9           | 2                    | 11             | 13.1                  | 183    | 21125 | 9.7  | Protein jagunal homolog 1                                                                                        |
| 2914 | Q96SW1           | 2                    | 11             | 13.1                  | 183    | 21072 | 9.6  | CDNA FLJ14602 fis, clone NT2RP1000191                                                                            |
| 2915 | UPI000049DF0A    | 2                    | 5              | 17.5                  | 120    | 13954 | 9.9  | 39S ribosomal protein L30, mitochondrial precursor (L30mt) (MRP-L30).                                            |
| 2915 | Q8TCC3-3         | 2                    | 5              | 16                    | 131    | 15191 | 10.3 | Isoform 3 of Q8TCC3                                                                                              |
| 2915 | Q0D2Q7           | 2                    | 5              | 13                    | 161    | 18576 | 10   | Mitochondrial ribosomal protein L30                                                                              |
| 2915 | Q8TCC3           | 2                    | 5              | 13                    | 161    | 18546 | 10   | 39S ribosomal protein L30, mitochondrial precursor                                                               |
| 2915 | UPI0000D61205    | 2                    | 5              | 12.3                  | 171    | 19668 | 10.1 | 39S ribosomal protein L30, mitochondrial precursor (L30mt) (MRP-L30).                                            |
| 2916 | Q8N183           | 2                    | 3              | 13                    | 169    | 19856 | 9    | Mimitin, mitochondrial precursor                                                                                 |
| 2917 | Q5SRD1           | 2                    | 5              | 15.8                  | 171    | 17870 | 7.9  | Translocase of inner mitochondrial membrane 23 homolog B                                                         |
| 2917 | O14925           | 2                    | 5              | 12.9                  | 209    | 21943 | 8.6  | Mitochondrial import inner membrane translocase subunit Tim23                                                    |
| 2917 | Q53FF8           | 2                    | 5              | 12.9                  | 209    | 21953 | 8.6  | Translocase of inner mitochondrial membrane 23 (Yeast) homolog                                                   |
| 2917 | UPI0000DD7FFF    | 2                    | 5              | 10.5                  | 257    | 28048 | 9.4  | PREDICTED: similar to Mitochondrial import inner membrane translocase subunit Tim23 isoform 1                    |
| 2918 | Q5TZX9           | 2                    | 2              | 12.9                  | 232    | 26616 | 9.2  | Vesicle transport through interaction with t-SNAREs homolog 1B                                                   |
| 2918 | Q9UEU0           | 2                    | 2              | 12.9                  | 232    | 26688 | 9    | Vesicle transport through interaction with t-SNAREs homolog 1B                                                   |
| 2919 | Q7Z4A2           | 2                    | 3              | 12.9                  | 233    | 24812 | 6.8  | Ankyrin repeat and SOCS box-containing 9                                                                         |
| 2919 | Q9BVF5           | 2                    | 3              | 11.9                  | 252    | 26849 | 6.6  | ASB9 protein                                                                                                     |
| 2919 | Q96DX5-2         | 2                    | 3              | 11.5                  | 262    | 27902 | 6.5  | Isoform 2 of Q96DX5                                                                                              |
| 2919 | Q96DX5           | 2                    | 3              | 10.2                  | 294    | 31858 | 7    | Ankyrin repeat and SOCS box protein 9                                                                            |
| 2920 | Q9BVK8           | 2                    | 3              | 12.9                  | 224    | 25261 | 7.7  | Transmembrane protein 147                                                                                        |
| 2921 | Q9H204           | 2                    | 2              | 12.9                  | 178    | 19520 | 5.6  | Mediator of RNA polymerase II transcription subunit 28                                                           |
| 2922 | Q9P0L0           | 2                    | 4              | 12.9                  | 249    | 27893 | 8.6  | Vesicle-associated membrane protein-associated protein A                                                         |
| 2923 | Q9Y2Y0           | 2                    | 3              | 12.9                  | 163    | 18822 | 4.3  | ADP-ribosylation factor-like protein 2-binding protein                                                           |
| 2924 | Q5JYY6           | 2                    | 5              | 26.4                  | 110    | 11926 | 5.2  | Proteasome (Prosome, macropain) 26S subunit, non-ATPase, 10                                                      |
| 2924 | Q8IZK9           | 2                    | 5              | 19.2                  | 151    | 16137 | 6    | Hepatocellular carcinoma-associated protein p28-II (Proteasome (Prosome, macropain) 26S subunit, non-ATPase, 10) |
| 2924 | Q5JYY5           | 2                    | 5              | 15.7                  | 185    | 20217 | 5.6  | Proteasome (Prosome, macropain) 26S subunit, non-ATPase, 10                                                      |
| 2924 | Q5JYY4           | 2                    | 5              | 15                    | 193    | 20808 | 6.6  | Proteasome (Prosome, macropain) 26S subunit, non-ATPase, 10                                                      |
| 2924 | O75832           | 2                    | 5              | 12.8                  | 226    | 24428 | 6.1  | 26S proteasome non-ATPase regulatory subunit 10                                                                  |
| 2924 | Q5U0B2           | 2                    | 5              | 12.8                  | 226    | 24458 | 6.1  | Proteasome (Prosome, macropain) 26S subunit, non-ATPase, 10                                                      |
| 2925 | P41208           | 2                    | 3              | 12.8                  | 172    | 19738 | 5    | Centrin-2                                                                                                        |
| 2926 | Q96GX9           | 2                    | 2              | 12.8                  | 242    | 27125 | 7.1  | APAF1-interacting protein                                                                                        |
| 2926 | UPI000006DF8A    | 2                    | 2              | 12.8                  | 242    | 27012 | 7.1  | APAF1 interacting protein                                                                                        |
| 2927 | UPI00002263A9    | 2                    | 3              | 12.8                  | 156    | 16608 | 10   | protein (peptidyl-prolyl cis/trans isomerase) NIMA-interacting, 4 (parvulin)                                     |

| No.  | Accession Number | Unique Peptide Count | Spectrum Count | Sequence Coverage (%) | Length | MolWt | pI   | Descriptive Name                                                                                           |
|------|------------------|----------------------|----------------|-----------------------|--------|-------|------|------------------------------------------------------------------------------------------------------------|
| 2928 | Q6QNY1           | 2                    | 2              | 12.7                  | 142    | 15961 | 4.9  | Biogenesis of lysosome-related organelles complex-1 subunit 2                                              |
| 2929 | Q14197           | 2                    | 6              | 12.6                  | 206    | 23630 | 10.1 | Immature colon carcinoma transcript 1 protein precursor                                                    |
| 2930 | UPI0000212024    | 2                    | 7              | 13.8                  | 160    | 17188 | 8.8  | PRA1 family protein 2.                                                                                     |
| 2930 | Q60831           | 2                    | 7              | 12.4                  | 178    | 19258 | 9.2  | PRA1 family protein 2                                                                                      |
| 2931 | Q9BSB4           | 2                    | 2              | 12.4                  | 218    | 25003 | 6.1  | Uncharacterized protein C12orf44                                                                           |
| 2931 | Q9HAE2           | 2                    | 2              | 12.4                  | 218    | 24991 | 6.1  | CDNA FLJ11773 fis, clone HEMBA1005852                                                                      |
| 2932 | Q53GG5-2         | 2                    | 3              | 12.3                  | 316    | 34280 | 7.7  | Isoform 2 of Q53GG5                                                                                        |
| 2933 | Q658V9           | 2                    | 4              | 12.3                  | 171    | 19673 | 6.9  | Hypothetical protein DKFZp666A212                                                                          |
| 2933 | Q9H671           | 2                    | 4              | 7.2                   | 291    | 32487 | 9.3  | CDNA: FLJ22555 fis, clone HSI01193                                                                         |
| 2933 | Q8WVWC4          | 2                    | 4              | 7.2                   | 291    | 32545 | 9.2  | Uncharacterized protein C2orf47                                                                            |
| 2934 | O14949           | 2                    | 5              | 12.2                  | 82     | 9906  | 10.1 | Ubiquinol-cytochrome c reductase complex ubiquinone-binding protein QP-C                                   |
| 2935 | Q9BS40           | 2                    | 5              | 12.2                  | 222    | 25769 | 5.8  | Latexin                                                                                                    |
| 2935 | UPI000006FB86    | 2                    | 5              | 12.2                  | 222    | 25750 | 5.8  | Latexin (Endogenous carboxypeptidase inhibitor) (ECI) (Tissue carboxypeptidase inhibitor) (TCI) (MUM).     |
| 2936 | Q5HYI7           | 2                    | 3              | 12                    | 158    | 17541 | 8.1  | Hypothetical protein DKFZp313L052                                                                          |
| 2936 | UPI0000E20823    | 2                    | 3              | 12                    | 158    | 17569 | 8.1  | metaxin 3                                                                                                  |
| 2936 | UPI0000D61653    | 2                    | 3              | 12                    | 158    | 17580 | 7.4  | metaxin 3                                                                                                  |
| 2937 | Q5T6Z8           | 2                    | 3              | 12                    | 192    | 21860 | 5.3  | Transmembrane protein 59                                                                                   |
| 2937 | Q6P5R1           | 2                    | 3              | 9.6                   | 239    | 27100 | 5    | TMEM59 protein                                                                                             |
| 2937 | Q9BXS4           | 2                    | 3              | 7.1                   | 323    | 36223 | 5.1  | Transmembrane protein 59 precursor                                                                         |
| 2938 | Q5TCK0           | 2                    | 2              | 12                    | 175    | 18977 | 5.1  | Polyamine-modulated factor 1                                                                               |
| 2938 | Q6ZVE6           | 2                    | 2              | 11.7                  | 180    | 20258 | 8.6  | CDNA FLJ42655 fis, clone BRACE3045033, moderately similar to Homo sapiens polyamine-modulated factor 1     |
| 2938 | Q5TCK1           | 2                    | 2              | 11.7                  | 180    | 20230 | 8.5  | Polyamine-modulated factor 1                                                                               |
| 2938 | Q6P1K2           | 2                    | 2              | 10.2                  | 205    | 23339 | 5.5  | Polyamine-modulated factor 1                                                                               |
| 2938 | Q5TCK2           | 2                    | 2              | 10                    | 211    | 23769 | 7.3  | Polyamine-modulated factor 1                                                                               |
| 2938 | Q6P1K2-5         | 2                    | 2              | 9.5                   | 220    | 24032 | 8.3  | Isoform 5 of Q6P1K2                                                                                        |
| 2939 | Q9UIS3           | 2                    | 4              | 32.8                  | 58     | 6427  | 8.4  | Transforming growth factor-alpha                                                                           |
| 2939 | Q53SK7           | 2                    | 4              | 14.8                  | 128    | 13879 | 7.8  | Hypothetical protein TGFA                                                                                  |
| 2939 | P01135           | 2                    | 4              | 11.9                  | 160    | 17006 | 7.5  | Transforming growth factor alpha precursor                                                                 |
| 2939 | Q9BS56           | 2                    | 4              | 11.9                  | 159    | 16935 | 7.5  | Transforming growth factor, alpha                                                                          |
| 2940 | Q6ZRV1           | 2                    | 8              | 11.9                  | 243    | 26419 | 8    | CDNA FLJ46073 fis, clone TESTI2001364, highly similar to Homo sapiens lactate dehydrogenase A-like         |
| 2941 | Q9P0I2-2         | 2                    | 3              | 14.2                  | 219    | 24915 | 9.7  | Isoform 2 of Q9P0I2                                                                                        |
| 2941 | Q9P0I2           | 2                    | 3              | 11.9                  | 261    | 29952 | 6.8  | Transmembrane protein 111                                                                                  |
| 2942 | Q9Y584           | 2                    | 2              | 11.9                  | 194    | 20031 | 7.6  | Mitochondrial import inner membrane translocase subunit Tim22                                              |
| 2943 | Q7Z6U1           | 2                    | 4              | 17.2                  | 128    | 14434 | 9.8  | TBP-like 1                                                                                                 |
| 2943 | Q7Z6U2           | 2                    | 4              | 13.5                  | 163    | 18282 | 9.6  | TBP-like 1                                                                                                 |
| 2943 | P62380           | 2                    | 4              | 11.8                  | 186    | 20887 | 9.5  | TATA box-binding protein-like protein 1                                                                    |
| 2944 | Q96HR3           | 2                    | 4              | 11.8                  | 178    | 20277 | 8.3  | Thyroid hormone receptor-associated protein 6                                                              |
| 2945 | P25686-3         | 2                    | 2              | 11.7                  | 324    | 35580 | 6    | Isoform 3 of P25686                                                                                        |
| 2946 | Q5TEG0           | 2                    | 2              | 11.7                  | 222    | 24341 | 5.7  | OTTHUMP0000017168                                                                                          |
| 2946 | UPI0000D614CC    | 2                    | 2              | 9.5                   | 275    | 30446 | 8.9  | Enoyl-CoA hydratase domain-containing protein 1.                                                           |
| 2946 | UPI0000D614CB    | 2                    | 2              | 9.1                   | 286    | 31306 | 8.3  | Enoyl-CoA hydratase domain-containing protein 1.                                                           |
| 2946 | Q9NZ30           | 2                    | 2              | 9.1                   | 286    | 31303 | 8.9  | Uncharacterized hypothalamus protein HCDASE                                                                |
| 2946 | UPI000013EEE5    | 2                    | 2              | 8.6                   | 303    | 33155 | 8.2  | Enoyl-CoA hydratase domain-containing protein 1.                                                           |
| 2946 | Q9NTX5           | 2                    | 2              | 8.5                   | 307    | 33698 | 8.2  | Enoyl-CoA hydratase domain-containing protein 1                                                            |
| 2947 | Q96EY5-2         | 2                    | 2              | 13.7                  | 233    | 24532 | 8.3  | Isoform 2 of Q96EY5                                                                                        |
| 2947 | Q96EY5-3         | 2                    | 2              | 12.5                  | 257    | 27050 | 9.4  | Isoform 3 of Q96EY5                                                                                        |
| 2947 | Q96EY5           | 2                    | 2              | 11.7                  | 273    | 28783 | 8.9  | Protein FAM125A                                                                                            |
| 2948 | Q969T4           | 2                    | 4              | 11.6                  | 207    | 22913 | 7.2  | Ubiquitin-conjugating enzyme E2 E3                                                                         |
| 2949 | Q96GD0           | 2                    | 2              | 11.5                  | 296    | 31698 | 6.5  | Pyridoxal phosphate phosphatase                                                                            |
| 2949 | UPI0000F2440E    | 2                    | 2              | 11.4                  | 298    | 31826 | 6.5  | PYRIDOXAL PHOSPHATE PHOSPHATASE                                                                            |
| 2949 | UPI0000F51D2A    | 2                    | 2              | 11.1                  | 306    | 32907 | 6.8  | Pyridoxal phosphate phosphatase                                                                            |
| 2950 | P59780           | 2                    | 4              | 11.4                  | 193    | 22017 | 5.2  | AP-3 complex subunit sigma-2                                                                               |
| 2950 | Q53H83           | 2                    | 4              | 11.4                  | 193    | 22147 | 5.2  | Adaptor-related protein complex 3, sigma 2 subunit variant                                                 |
| 2951 | UPI0000112548    | 2                    | 3              | 19.8                  | 121    | 13492 | 4.8  | frataxin                                                                                                   |
| 2951 | Q16595           | 2                    | 3              | 11.4                  | 210    | 23135 | 8.7  | Frataxin, mitochondrial precursor (Friedreich ataxia protein) (Fxn) [Contains: Frataxin intermediate form] |
| 2952 | P35754           | 2                    | 4              | 11.3                  | 106    | 11776 | 8.1  | Glutaredoxin-1                                                                                             |
| 2953 | Q9NYS3           | 2                    | 2              | 39.2                  | 79     | 8443  | 9.7  | Apoptosis-related protein PNAS-3                                                                           |
| 2953 | UPI00003FE520    | 2                    | 2              | 18.9                  | 164    | 17248 | 9.3  | exosome component 3 isoform 2                                                                              |
| 2953 | Q9NQT5           | 2                    | 2              | 11.3                  | 275    | 29572 | 8.1  | Exosome complex exonuclease RRP40                                                                          |
| 2954 | Q9NWV4           | 2                    | 2              | 11.2                  | 160    | 18048 | 5    | Uncharacterized protein C1orf123                                                                           |
| 2955 | Q9NX00           | 2                    | 2              | 11.2                  | 188    | 19657 | 8    | Transmembrane protein 160                                                                                  |
| 2956 | Q6UW68           | 2                    | 4              | 11.1                  | 189    | 21198 | 8.6  | MBC3205                                                                                                    |
| 2957 | Q7Z7H8           | 2                    | 3              | 11.1                  | 261    | 29297 | 9.6  | 39S ribosomal protein L10, mitochondrial precursor                                                         |
| 2957 | UPI000004FA30    | 2                    | 3              | 11.1                  | 261    | 29283 | 9.6  | mitochondrial ribosomal protein L10 isoform a                                                              |
| 2957 | UPI000013DFCA    | 2                    | 3              | 10.7                  | 271    | 30307 | 9.2  | mitochondrial ribosomal protein L10 isoform b                                                              |
| 2958 | Q8WZA0           | 2                    | 5              | 11.1                  | 190    | 21495 | 4.9  | Protein LZIC                                                                                               |
| 2959 | Q9HC07           | 2                    | 6              | 11.1                  | 324    | 34906 | 7    | Transmembrane protein 165                                                                                  |

| No.  | Accession Number | Unique Peptide Count | Spectrum Count | Sequence Coverage (%) | Length | MolWt  | pI   | Descriptive Name                                                                                                                                                                                                                                                       |
|------|------------------|----------------------|----------------|-----------------------|--------|--------|------|------------------------------------------------------------------------------------------------------------------------------------------------------------------------------------------------------------------------------------------------------------------------|
| 2960 | P13796           | 2                    | 2              | 11                    | 627    | 70289  | 5.3  | Plastin-2                                                                                                                                                                                                                                                              |
| 2960 | Q5TBN4           | 2                    | 2              | 11                    | 627    | 70289  | 5.4  | Lymphocyte cytosolic protein 1                                                                                                                                                                                                                                         |
| 2960 | Q53F11           | 2                    | 2              | 11                    | 627    | 70259  | 5.3  | L-plastin variant                                                                                                                                                                                                                                                      |
| 2961 | Q969E8           | 2                    | 4              | 11                    | 191    | 20894  | 4.4  | Pre-rRNA-processing protein TSR2 homolog                                                                                                                                                                                                                               |
| 2962 | P11802           | 2                    | 3              | 10.9                  | 303    | 33730  | 7    | Cell division protein kinase 4                                                                                                                                                                                                                                         |
| 2963 | Q9NUP3           | 2                    | 2              | 16.4                  | 483    | 54025  | 6.2  | CDNA FLJ11224 fis, clone PLACE1008273, moderately similar to COATOMER GAMMA SUBUNIT                                                                                                                                                                                    |
| 2963 | Q2NLA0           | 2                    | 2              | 10.9                  | 726    | 81483  | 6.6  | COPG2 protein                                                                                                                                                                                                                                                          |
| 2963 | Q9H9B7           | 2                    | 2              | 9.9                   | 799    | 89387  | 5.7  | CDNA FLJ12872 fis, clone NT2RP2003760, highly similar to COATOMER GAMMA SUBUNIT                                                                                                                                                                                        |
| 2963 | Q9UBF2           | 2                    | 2              | 9.1                   | 871    | 97622  | 5.8  | Coatomer subunit gamma-2                                                                                                                                                                                                                                               |
| 2964 | UPI0000D616A3    | 2                    | 7              | 11.1                  | 1256   | 145905 | 7    | cytoplasmic FMR1 interacting protein 2                                                                                                                                                                                                                                 |
| 2964 | Q96F07-2         | 2                    | 7              | 11.1                  | 1253   | 145673 | 7.1  | Isoform 2 of Q96F07                                                                                                                                                                                                                                                    |
| 2964 | UPI0000D616A2    | 2                    | 7              | 11                    | 1258   | 146231 | 7.1  | cytoplasmic FMR1 interacting protein 2                                                                                                                                                                                                                                 |
| 2964 | Q96F07           | 2                    | 7              | 10.9                  | 1278   | 148398 | 7.3  | Cytoplasmic FMR1-interacting protein 2                                                                                                                                                                                                                                 |
| 2965 | Q9P032           | 2                    | 2              | 10.9                  | 175    | 20266  | 8.8  | UPF0240 protein C6orf66                                                                                                                                                                                                                                                |
| 2966 | Q16775           | 2                    | 3              | 10.8                  | 260    | 28860  | 7.3  | Hydroxyacylglutathione hydrolase                                                                                                                                                                                                                                       |
| 2967 | Q9NX20           | 2                    | 6              | 10.8                  | 251    | 28449  | 10.1 | 39S ribosomal protein L16, mitochondrial precursor                                                                                                                                                                                                                     |
| 2968 | UPI00001FBCE1    | 2                    | 2              | 10.8                  | 251    | 28137  | 5.7  | PREDICTED: similar to Unc119c isoform 3                                                                                                                                                                                                                                |
| 2969 | O14521           | 2                    | 3              | 10.7                  | 159    | 17043  | 8.6  | Succinate dehydrogenase [ubiquinone] cytochrome b small subunit, mitochondrial precursor                                                                                                                                                                               |
| 2969 | UPI0000D62687    | 2                    | 3              | 10.7                  | 159    | 17043  | 8.6  | Succinate dehydrogenase [ubiquinone] cytochrome b small subunit, mitochondrial precursor (CybS) (Succinate-ubiquinone reductase membrane anchor subunit) (QPs3) (CII-4) (Succinate dehydrogenase complex subunit D) (Succinate-ubiquinone oxidoreductase cytoch        |
| 2969 | UPI000016179F    | 2                    | 3              | 10.7                  | 159    | 17004  | 8.6  | PREDICTED: similar to Succinate dehydrogenase [ubiquinone] cytochrome b small subunit, mitochondrial precursor (CybS) (Succinate-ubiquinone reductase membrane anchor subunit) (QPs3) (CII-4) (Succinate dehydrogenase complex subunit D) (Succinate-ubiquinone oxi... |
| 2969 | Q9CXV1           | 2                    | 3              | 10.7                  | 159    | 17014  | 9.1  | Succinate dehydrogenase [ubiquinone] cytochrome b small subunit, mitochondrial precursor                                                                                                                                                                               |
| 2970 | Q9Y315           | 2                    | 3              | 11                    | 318    | 35231  | 8.9  | Putative deoxyribose-phosphate aldolase                                                                                                                                                                                                                                |
| 2970 | Q53HN9           | 2                    | 3              | 10.7                  | 326    | 35837  | 9.1  | 2-deoxyribose-5-phosphate aldolase homolog                                                                                                                                                                                                                             |
| 2971 | Q7Z5U5           | 2                    | 2              | 10.7                  | 177    | 20848  | 8.7  | CCDC25 protein                                                                                                                                                                                                                                                         |
| 2971 | Q86WR0           | 2                    | 2              | 9.1                   | 208    | 24479  | 6.8  | Coiled-coil domain-containing protein 25                                                                                                                                                                                                                               |
| 2972 | Q13907           | 2                    | 2              | 10.6                  | 227    | 26319  | 6.4  | Isopentenyl-diphosphate Delta-isomerase 1                                                                                                                                                                                                                              |
| 2972 | UPI0000F5342F    | 2                    | 2              | 10.3                  | 233    | 26862  | 6.4  | Isopentenyl-diphosphate delta isomerase                                                                                                                                                                                                                                |
| 2972 | Q53GQ6           | 2                    | 2              | 9.8                   | 245    | 28345  | 6.6  | Isopentenyl-diphosphate delta isomerase variant                                                                                                                                                                                                                        |
| 2972 | Q32Q13           | 2                    | 2              | 9.8                   | 246    | 28515  | 6.8  | IDI1 protein                                                                                                                                                                                                                                                           |
| 2973 | Q53EQ5           | 2                    | 2              | 10.6                  | 208    | 23144  | 9    | Hypothetical protein                                                                                                                                                                                                                                                   |
| 2973 | Q8N511           | 2                    | 2              | 10.6                  | 208    | 23130  | 9    | Uncharacterized protein C17orf32                                                                                                                                                                                                                                       |
| 2974 | Q6Y1H2           | 2                    | 4              | 10.6                  | 254    | 28368  | 9.5  | Protein-tyrosine phosphatase-like member B                                                                                                                                                                                                                             |
| 2974 | UPI0000D61B65    | 2                    | 4              | 10.6                  | 255    | 28638  | 9.5  | protein tyrosine phosphatase-like (proline instead of catalytic arginine), member b                                                                                                                                                                                    |
| 2975 | O95456-2         | 2                    | 3              | 11.2                  | 267    | 30288  | 7.8  | Isoform 2 of O95456                                                                                                                                                                                                                                                    |
| 2975 | O95456           | 2                    | 3              | 10.4                  | 288    | 32854  | 7.2  | Down syndrome critical region protein 2                                                                                                                                                                                                                                |
| 2975 | Q6FHA3           | 2                    | 3              | 10.4                  | 288    | 32840  | 7.2  | DSCR2 protein                                                                                                                                                                                                                                                          |
| 2976 | Q53GL1           | 2                    | 2              | 10.4                  | 279    | 31920  | 8.9  | Nicotinamide nucleotide adenyltransferase 1 variant                                                                                                                                                                                                                    |
| 2976 | Q9HAN9           | 2                    | 2              | 10.4                  | 279    | 31932  | 8.9  | Nicotinamide mononucleotide adenyltransferase 1                                                                                                                                                                                                                        |
| 2977 | UPI00006C136D    | 2                    | 2              | 13.3                  | 181    | 20878  | 10.5 | PREDICTED: similar to Protein C21orf70 homolog                                                                                                                                                                                                                         |
| 2977 | Q9NSI2-2         | 2                    | 2              | 11.2                  | 215    | 23945  | 10.9 | Isoform B of Q9NSI2                                                                                                                                                                                                                                                    |
| 2977 | Q9NSI2           | 2                    | 2              | 10.4                  | 230    | 25456  | 11.1 | Uncharacterized protein C21orf70                                                                                                                                                                                                                                       |
| 2978 | P60520           | 2                    | 3              | 10.3                  | 117    | 13667  | 8.1  | Gamma-aminobutyric acid receptor-associated protein-like 2 (GABA(A) receptor-associated protein-like 2)                                                                                                                                                                |
| 2979 | UPI0000E87021    | 2                    | 3              | 11.2                  | 242    | 27488  | 6.2  | Spindlin-1                                                                                                                                                                                                                                                             |
| 2979 | UPI000049E0E5    | 2                    | 3              | 11                    | 246    | 28053  | 6    | Spindlin-1 (Ovarian cancer-related protein).                                                                                                                                                                                                                           |
| 2979 | Q9Y657           | 2                    | 3              | 10.3                  | 262    | 29601  | 7    | Spindlin-1                                                                                                                                                                                                                                                             |
| 2980 | P55210           | 2                    | 2              | 10.2                  | 303    | 34277  | 6.1  | Caspase-7 precursor (EC 3.4.22.60) (CASP-7) (ICE-like apoptotic protease 3) (ICE-LAP3) (Apoptotic protease Mch-3) (CMH-1) [Contains: Caspase-7 subunit p20; Caspase-7 subunit p11]                                                                                     |
| 2980 | Q53YD5           | 2                    | 2              | 10.2                  | 303    | 34291  | 6.1  | Caspase 7, apoptosis-related cysteine protease                                                                                                                                                                                                                         |
| 2981 | P82930           | 2                    | 4              | 10.1                  | 218    | 25650  | 10   | Mitochondrial 28S ribosomal protein S34                                                                                                                                                                                                                                |
| 2982 | Q5JXX1           | 2                    | 2              | 18.4                  | 158    | 17617  | 10.4 | Mortality factor 4 like 2                                                                                                                                                                                                                                              |
| 2982 | Q5JXX2           | 2                    | 2              | 16.4                  | 177    | 19831  | 10   | Mortality factor 4 like 2                                                                                                                                                                                                                                              |
| 2982 | Q5JXX3           | 2                    | 2              | 16.3                  | 178    | 19902  | 10   | Mortality factor 4 like 2                                                                                                                                                                                                                                              |
| 2982 | Q15014           | 2                    | 2              | 10.1                  | 288    | 32308  | 9.7  | Mortality factor 4-like protein 2                                                                                                                                                                                                                                      |
| 2982 | Q53EY5           | 2                    | 2              | 10.1                  | 288    | 32312  | 9.7  | MORF-related gene X variant                                                                                                                                                                                                                                            |
| 2983 | Q9BT09           | 2                    | 4              | 10.1                  | 278    | 30748  | 5.5  | Trinucleotide repeat-containing protein 5                                                                                                                                                                                                                              |
| 2984 | Q9NY12-2         | 2                    | 3              | 11.1                  | 199    | 20834  | 10.4 | Isoform 2 of Q9NY12                                                                                                                                                                                                                                                    |
| 2984 | Q9NY12           | 2                    | 3              | 10.1                  | 217    | 22348  | 10.9 | H/ACA ribonucleoprotein complex subunit 1                                                                                                                                                                                                                              |
| 2985 | Q9Y324           | 2                    | 3              | 10.1                  | 198    | 23370  | 9.7  | rRNA-processing protein FCF1 homolog                                                                                                                                                                                                                                   |

| No.  | Accession Number | Unique Peptide Count | Spectrum Count | Sequence Coverage (%) | Length | MolWt | pI   | Descriptive Name                                                                                                       |
|------|------------------|----------------------|----------------|-----------------------|--------|-------|------|------------------------------------------------------------------------------------------------------------------------|
| 2986 | O14593-2         | 2                    | 2              | 11                    | 237    | 25580 | 4.4  | Isoform RFX                                                                                                            |
| 2986 | Q24JQ1           | 2                    | 2              | 10.9                  | 238    | 25652 | 4.4  | Regulatory factor X-associated ankyrin-containing protein                                                              |
| 2986 | O14593           | 2                    | 2              | 10                    | 260    | 28102 | 4.5  | DNA-binding protein RFXANK                                                                                             |
| 2986 | Q6IB23           | 2                    | 2              | 10                    | 260    | 28088 | 4.5  | RFXANK protein                                                                                                         |
| 2987 | Q59FA5           | 2                    | 2              | 17.9                  | 112    | 12320 | 7.4  | Transgelin variant                                                                                                     |
| 2987 | Q53GC9           | 2                    | 2              | 10.9                  | 184    | 20889 | 8.7  | Transgelin variant                                                                                                     |
| 2987 | Q01995           | 2                    | 2              | 10                    | 201    | 22611 | 8.8  | Transgelin                                                                                                             |
| 2987 | Q6FI52           | 2                    | 2              | 10                    | 201    | 22551 | 8.8  | TAGLN protein                                                                                                          |
| 2988 | Q53FM2           | 2                    | 2              | 10                    | 281    | 32162 | 6.8  | Chromosome 1 open reading frame 48 variant                                                                             |
| 2988 | Q96IY1           | 2                    | 2              | 10                    | 281    | 32130 | 6.8  | Kinetochore-associated protein NSL1 homolog                                                                            |
| 2989 | Q8WVC6           | 2                    | 4              | 10                    | 231    | 26550 | 9.6  | Dephospho-CoA kinase domain-containing protein                                                                         |
| 2989 | Q9BR71           | 2                    | 4              | 10                    | 231    | 26549 | 9.6  | Dephospho-CoA kinase domain containing                                                                                 |
| 2990 | Q8N5M4           | 2                    | 3              | 9.9                   | 171    | 20013 | 8.9  | Tetrapeptide repeat domain 9C                                                                                          |
| 2991 | P07305           | 2                    | 11             | 9.8                   | 194    | 20863 | 10.8 | Histone H1.0 (Histone H1(0))                                                                                           |
| 2992 | Q6FGR9           | 2                    | 7              | 10.5                  | 229    | 25695 | 7.6  | ARHE protein                                                                                                           |
| 2992 | Q6FGN7           | 2                    | 7              | 10.5                  | 229    | 25637 | 7.8  | ARHE protein                                                                                                           |
| 2992 | P61587           | 2                    | 7              | 9.8                   | 244    | 27368 | 8.5  | Rho-related GTP-binding protein RhoE precursor                                                                         |
| 2992 | UPI0000D61248    | 2                    | 7              | 9.7                   | 247    | 27782 | 8.6  | Rho-related GTP-binding protein RhoE (Rho family GTPase 3) (Rnd3) (Rho8) (MemB protein).                               |
| 2993 | Q9BSK0           | 2                    | 5              | 9.8                   | 173    | 18914 | 9.6  | MARVEL domain-containing protein 1                                                                                     |
| 2994 | Q9NX58           | 2                    | 3              | 9.8                   | 379    | 43615 | 9.5  | Cell growth-regulating nucleolar protein                                                                               |
| 2994 | UPI0000037C40    | 2                    | 3              | 9.8                   | 379    | 43634 | 9.6  | hypothetical protein FLJ20425                                                                                          |
| 2995 | Q96N63           | 2                    | 16             | 19.8                  | 121    | 13202 | 7.2  | CDNA FLJ31361 fis, clone MESAN2008460, highly similar to Homo sapiens SL15 protein mRNA                                |
| 2995 | Q96K24           | 2                    | 16             | 19                    | 126    | 13431 | 9    | CDNA FLJ14836 fis, clone OVARC1001702                                                                                  |
| 2995 | UPI000013E72D    | 2                    | 16             | 18.9                  | 127    | 13615 | 9    | Mannose-P-dolichol utilization defect 1 protein (Suppressor of Lec15 and Lec35 glycosylation mutation homolog) (SL15). |
| 2995 | Q9H3L2           | 2                    | 16             | 11.4                  | 211    | 22609 | 8.3  | My008 protein                                                                                                          |
| 2995 | O75352           | 2                    | 16             | 9.7                   | 247    | 26707 | 9.1  | Mannose-P-dolichol utilization defect 1 protein                                                                        |
| 2995 | UPI000013CCA4    | 2                    | 16             | 9.7                   | 247    | 26638 | 8.9  | mannose-P-dolichol utilization defect 1                                                                                |
| 2995 | Q9BUU8           | 2                    | 16             | 9.7                   | 247    | 26668 | 8.9  | Mannose-P-dolichol utilization defect 1                                                                                |
| 2995 | Q1HDL3           | 2                    | 16             | 8                     | 299    | 32006 | 7.6  | HBeAg-binding protein 2 binding protein A                                                                              |
| 2996 | Q6NVW3           | 2                    | 2              | 9.7                   | 278    | 29197 | 8.6  | YRDC protein                                                                                                           |
| 2996 | Q86U90           | 2                    | 2              | 9.7                   | 279    | 29328 | 8.6  | YrdC domain-containing protein                                                                                         |
| 2996 | Q7L4E4           | 2                    | 2              | 9.2                   | 292    | 30663 | 9.1  | YRDC protein                                                                                                           |
| 2997 | O15400-2         | 2                    | 3              | 10.5                  | 239    | 27400 | 5.1  | Isoform 2 of O15400                                                                                                    |
| 2997 | O15400           | 2                    | 3              | 9.6                   | 261    | 29816 | 5.6  | Syntaxin-7                                                                                                             |
| 2997 | UPI0000161DE1    | 2                    | 3              | 9.6                   | 261    | 29846 | 5.6  | syntaxin 7                                                                                                             |
| 2998 | Q15796-2         | 2                    | 5              | 10.3                  | 438    | 49043 | 7.1  | Isoform Short of Q15796                                                                                                |
| 2998 | Q15796           | 2                    | 5              | 9.6                   | 467    | 52306 | 6.6  | Mothers against decapentaplegic homolog 2                                                                              |
| 2999 | Q5U602           | 2                    | 26             | 9.6                   | 229    | 25698 | 7    | RAB33B, member RAS oncogene family                                                                                     |
| 2999 | Q9H082           | 2                    | 26             | 9.6                   | 229    | 25717 | 7.2  | Ras-related protein Rab-33B                                                                                            |
| 3000 | A2A2Q2           | 2                    | 9              | 9.5                   | 221    | 25490 | 9.1  | Chromosome 20 open reading frame 44                                                                                    |
| 3000 | Q5T347           | 2                    | 9              | 8.6                   | 243    | 27909 | 9.1  | Chromosome 20 open reading frame 44                                                                                    |
| 3000 | Q5T352           | 2                    | 9              | 8.4                   | 249    | 28939 | 8.8  | Chromosome 20 open reading frame 44                                                                                    |
| 3000 | UPI0000456F84    | 2                    | 9              | 7.7                   | 273    | 31546 | 9    | Basic FGF-repressed Zic-binding protein (bFZb).                                                                        |
| 3000 | Q9NVA1-2         | 2                    | 9              | 7.7                   | 273    | 31517 | 8.8  | Isoform 2 of Q9NVA1                                                                                                    |
| 3000 | Q9NVA1           | 2                    | 9              | 7                     | 299    | 34572 | 8.8  | Basic FGF-repressed Zic-binding protein                                                                                |
| 3000 | Q3KRB6           | 2                    | 9              | 7                     | 299    | 34600 | 8.9  | Chromosome 20 open reading frame 44                                                                                    |
| 3000 | UPI0000D61074    | 2                    | 9              | 6.7                   | 313    | 36249 | 8.6  | Basic FGF-repressed Zic-binding protein (bFZb).                                                                        |
| 3001 | P51809           | 2                    | 13             | 9.5                   | 220    | 24935 | 8.6  | Synaptobrevin-like protein 1                                                                                           |
| 3002 | Q00403           | 2                    | 3              | 9.5                   | 316    | 34833 | 8.4  | Transcription initiation factor IIB                                                                                    |
| 3003 | Q9H0T5           | 2                    | 2              | 9.5                   | 179    | 20317 | 6    | Hypothetical protein DKFZp564C1362                                                                                     |
| 3004 | O75208           | 2                    | 2              | 9.4                   | 318    | 35509 | 5.9  | Ubiquinone biosynthesis protein COQ9, mitochondrial precursor                                                          |
| 3004 | UPI0000D619F5    | 2                    | 2              | 9.3                   | 324    | 35968 | 5.6  | Ubiquinone biosynthesis protein COQ9, mitochondrial precursor.                                                         |
| 3005 | Q6ICJ4           | 2                    | 6              | 10                    | 230    | 25948 | 7.5  | Em:AP000351.3 protein                                                                                                  |
| 3005 | P30712           | 2                    | 6              | 9.4                   | 244    | 27507 | 6.4  | Glutathione S-transferase theta-2                                                                                      |
| 3005 | UPI000006DC51    | 2                    | 6              | 9.4                   | 244    | 27506 | 7    | glutathione S-transferase theta 2 (GSTT2), mRNA                                                                        |
| 3005 | Q6IB75           | 2                    | 6              | 9.4                   | 244    | 27532 | 7    | GSTT2 protein                                                                                                          |
| 3006 | Q6IAH4           | 2                    | 5              | 9.4                   | 224    | 25320 | 8.2  | HCCA3 protein                                                                                                          |
| 3006 | Q9NRV1           | 2                    | 5              | 9.4                   | 224    | 25279 | 7.6  | X 003 protein                                                                                                          |
| 3006 | Q9P1R6           | 2                    | 5              | 8.2                   | 256    | 28616 | 7.6  | HDCMC29P                                                                                                               |
| 3006 | Q969U7           | 2                    | 5              | 8                     | 264    | 29396 | 7    | Tumor necrosis factor superfamily, member 5-induced protein 1                                                          |
| 3007 | Q8TB37-2         | 2                    | 3              | 17.3                  | 173    | 18209 | 10.1 | Isoform 2 of Q8TB37                                                                                                    |
| 3007 | Q8TB37           | 2                    | 3              | 9.4                   | 319    | 34083 | 9    | Nucleotide-binding protein-like                                                                                        |
| 3008 | Q9NQT4           | 2                    | 2              | 9.4                   | 235    | 25249 | 7.6  | Exosome complex exonuclease RRP46                                                                                      |
| 3009 | O00193           | 2                    | 6              | 9.3                   | 183    | 20333 | 4.7  | Small acidic protein                                                                                                   |
| 3010 | P29084           | 2                    | 2              | 9.3                   | 291    | 33044 | 9.7  | Transcription initiation factor IIE subunit beta                                                                       |
| 3011 | P84157-2         | 2                    | 4              | 11.2                  | 170    | 17493 | 4.1  | Isoform 2 of P84157                                                                                                    |
| 3011 | P84157-3         | 2                    | 4              | 10.7                  | 177    | 18207 | 4.1  | Isoform 3 of P84157                                                                                                    |
| 3011 | P84157           | 2                    | 4              | 9.3                   | 204    | 21466 | 4.3  | Matrix-remodelling-associated protein 7                                                                                |
| 3012 | Q4VXZ8           | 2                    | 2              | 9.3                   | 280    | 29484 | 8.9  | 2,4-dienoyl CoA reductase 2, peroxisomal                                                                               |
| 3012 | Q9NUI1           | 2                    | 2              | 8.9                   | 292    | 30778 | 9.2  | Peroxisomal 2,4-dienoyl-CoA reductase                                                                                  |
| 3013 | Q9UMY1           | 2                    | 2              | 9.3                   | 257    | 29426 | 9.7  | Nucleolar protein 7                                                                                                    |

| No.  | Accession Number | Unique Peptide Count | Spectrum Count | Sequence Coverage (%) | Length | MolWt  | pI  | Descriptive Name                                                                                                                        |
|------|------------------|----------------------|----------------|-----------------------|--------|--------|-----|-----------------------------------------------------------------------------------------------------------------------------------------|
| 3014 | Q95105           | 2                    | 2              | 9.2                   | 262    | 29411  | 5.4 | Tetratricopeptide repeat protein 33                                                                                                     |
| 3014 | Q6PID6           | 2                    | 2              | 9.2                   | 262    | 29439  | 5.4 | Tetratricopeptide repeat domain 33                                                                                                      |
| 3015 | Q5TGA2           | 2                    | 2              | 9.8                   | 296    | 33085  | 5.6 | Peptidyl-prolyl cis-trans isomerase                                                                                                     |
| 3015 | Q9UNP9           | 2                    | 2              | 9.6                   | 301    | 33431  | 5.6 | Peptidyl-prolyl cis-trans isomerase E                                                                                                   |
| 3015 | Q3S611           | 2                    | 2              | 9.2                   | 314    | 35020  | 6.2 | Cyclophilin-33B                                                                                                                         |
| 3015 | Q5TGA3           | 2                    | 2              | 9.2                   | 314    | 34991  | 6.4 | Peptidyl-prolyl cis-trans isomerase                                                                                                     |
| 3016 | Q9GZP9           | 2                    | 7              | 9.2                   | 239    | 27567  | 7.3 | Derlin-2                                                                                                                                |
| 3017 | Q9Y5N6           | 2                    | 2              | 9.1                   | 252    | 28107  | 8.7 | Origin recognition complex subunit 6                                                                                                    |
| 3018 | Q53SH3           | 2                    | 3              | 9                     | 321    | 34862  | 5.3 | Hypothetical protein ABI-2                                                                                                              |
| 3018 | Q9NYB9-3         | 2                    | 3              | 7.2                   | 401    | 44409  | 7.3 | Isoform 3 of Q9NYB9                                                                                                                     |
| 3018 | Q9NYB9-2         | 2                    | 3              | 6.1                   | 475    | 52446  | 6   | Isoform 2 of Q9NYB9                                                                                                                     |
| 3018 | UPI0000DD7B05    | 2                    | 3              | 5.8                   | 497    | 53977  | 6.8 | PREDICTED: similar to Abl interactor 2 (Abelson interactor 2) (Abi-2) (Abl-binding protein 3) (AblBP3) (Arg-binding protein 1) (ArgBP1) |
| 3018 | Q9NYB9           | 2                    | 3              | 5.7                   | 513    | 55663  | 6.2 | Abl interactor 2                                                                                                                        |
| 3019 | Q6PJL1           | 2                    | 2              | 9                     | 466    | 49577  | 5.5 | Nicotinate phosphoribosyltransferase domain containing 1                                                                                |
| 3019 | Q9BRG0           | 2                    | 2              | 8.2                   | 514    | 54993  | 6   | NAPRT1 protein                                                                                                                          |
| 3019 | Q6XQN4           | 2                    | 2              | 8                     | 525    | 56085  | 5.7 | Nicotinate phosphoribosyltransferase-like protein                                                                                       |
| 3019 | Q6XQN5           | 2                    | 2              | 7.8                   | 538    | 57564  | 5.7 | Nicotinate phosphoribosyltransferase-like protein                                                                                       |
| 3019 | UPI0000D62514    | 2                    | 2              | 7.4                   | 566    | 60234  | 5.8 | nicotinate phosphoribosyltransferase domain containing 1                                                                                |
| 3019 | Q6XQN6           | 2                    | 2              | 7.4                   | 567    | 60277  | 5.8 | Nicotinate phosphoribosyltransferase domain-containing protein 1                                                                        |
| 3020 | Q99757           | 2                    | 10             | 9                     | 166    | 18383  | 8.3 | Thioredoxin, mitochondrial precursor                                                                                                    |
| 3021 | Q43731           | 2                    | 7              | 8.9                   | 214    | 25027  | 8.9 | ER lumen protein retaining receptor 3                                                                                                   |
| 3021 | Q4V750           | 2                    | 7              | 8.6                   | 220    | 25648  | 8.1 | KDEL (Lys-Asp-Glu-Leu) endoplasmic reticulum protein retention receptor 3                                                               |
| 3021 | Q43731-2         | 2                    | 7              | 8.6                   | 220    | 25690  | 8.1 | Isoform 2 of Q43731                                                                                                                     |
| 3022 | Q14331           | 2                    | 4              | 8.9                   | 258    | 29172  | 9   | Protein FRG1                                                                                                                            |
| 3023 | Q15041           | 2                    | 46             | 8.9                   | 203    | 23363  | 9.3 | ARL-6-interacting protein 1                                                                                                             |
| 3024 | Q59H03           | 2                    | 2              | 8.9                   | 224    | 25336  | 6.2 | Hypothetical protein                                                                                                                    |
| 3024 | Q86VN1           | 2                    | 2              | 5.2                   | 386    | 43817  | 7.2 | Vacuolar protein sorting-associated protein 36                                                                                          |
| 3025 | Q8TAA5           | 2                    | 2              | 8.9                   | 225    | 25431  | 7.7 | GrpE protein homolog 2, mitochondrial precursor                                                                                         |
| 3026 | P24385           | 2                    | 2              | 8.8                   | 295    | 33729  | 5   | G1/S-specific cyclin-D1                                                                                                                 |
| 3027 | Q498A9           | 2                    | 3              | 9.1                   | 309    | 33412  | 5.2 | NUBP1 protein                                                                                                                           |
| 3027 | Q32M30           | 2                    | 3              | 8.8                   | 320    | 34535  | 5.3 | Nucleotide binding protein 1                                                                                                            |
| 3027 | Q53FS7           | 2                    | 3              | 8.8                   | 320    | 34508  | 5.3 | Nucleotide binding protein 1 (MinD homolog, E. coli) variant                                                                            |
| 3028 | Q6IN77           | 2                    | 3              | 10.5                  | 887    | 100408 | 5   | Transportin 2                                                                                                                           |
| 3028 | Q4LE60           | 2                    | 3              | 8.8                   | 1051   | 117677 | 5.6 | TNPO2 variant protein                                                                                                                   |
| 3029 | Q5VZM0           | 2                    | 4              | 8.8                   | 194    | 22919  | 5.9 | Ras-related GTP binding B                                                                                                               |
| 3029 | Q7L523           | 2                    | 4              | 5.4                   | 313    | 36566  | 7.7 | Ras-related GTP-binding protein A                                                                                                       |
| 3029 | Q5VZM2-2         | 2                    | 4              | 4.9                   | 346    | 40172  | 6.1 | Isoform 2 of Q5VZM2                                                                                                                     |
| 3029 | Q5VZM2           | 2                    | 4              | 4.5                   | 374    | 43250  | 6.2 | Ras-related GTP-binding protein B                                                                                                       |
| 3030 | Q8TCZ3           | 2                    | 2              | 8.8                   | 239    | 26802  | 5.3 | Proteinase-related protein                                                                                                              |
| 3030 | UPI000013D49E    | 2                    | 2              | 6.8                   | 309    | 35028  | 4.6 | solute carrier family 7, member 6 opposite strand                                                                                       |
| 3030 | Q9H8R8           | 2                    | 2              | 6.8                   | 309    | 35102  | 4.6 | CDNA FLJ13291 fis, clone OVARC1001176                                                                                                   |
| 3030 | Q96CW6           | 2                    | 2              | 6.8                   | 309    | 35086  | 4.6 | Solute carrier family 7 member 6 opposite strand                                                                                        |
| 3031 | Q99766           | 2                    | 2              | 8.8                   | 215    | 24882  | 7.6 | ATP synthase subunit s, mitochondrial precursor                                                                                         |
| 3031 | UPI000013F17D    | 2                    | 2              | 8.8                   | 215    | 24866  | 7.6 | ATP synthase, H+ transporting, mitochondrial F0 complex, subunit s isoform a precursor                                                  |
| 3032 | Q9Y3Q3           | 2                    | 6              | 8.8                   | 217    | 24777  | 5.6 | Transmembrane emp24 domain-containing protein 3 precursor                                                                               |
| 3033 | Q06136           | 2                    | 2              | 8.7                   | 332    | 36187  | 7.1 | 3-ketodihydroshingosine reductase precursor                                                                                             |
| 3034 | Q969E4           | 2                    | 7              | 9                     | 200    | 22502  | 4.9 | Transcription elongation factor A protein-like 3                                                                                        |
| 3034 | Q5H9L2           | 2                    | 7              | 8.7                   | 206    | 23307  | 4.8 | Transcription elongation factor A protein-like 5                                                                                        |
| 3035 | Q9BUE0           | 2                    | 2              | 8.7                   | 208    | 23663  | 6.5 | Mediator of RNA polymerase II transcription subunit 18                                                                                  |
| 3035 | Q9NXU9           | 2                    | 2              | 8.7                   | 208    | 23651  | 6.5 | CDNA FLJ20045 fis, clone COL00548                                                                                                       |
| 3036 | UPI0000117170    | 2                    | 3              | 8.7                   | 577    | 63481  | 9.2 | insulin-like growth factor 2 mRNA binding protein 1                                                                                     |
| 3037 | Q5JB54           | 2                    | 4              | 13.9                  | 245    | 26749  | 9.1 | Proliferation-inducing gene 5                                                                                                           |
| 3037 | UPI000013E89A    | 2                    | 4              | 10.4                  | 328    | 36167  | 8.8 | macrophage erythroblast attacher isoform 2                                                                                              |
| 3037 | Q9H9Z4           | 2                    | 4              | 10.4                  | 328    | 36095  | 8.9 | CDNA FLJ12453 fis, clone NT2RM1000430, moderately similar to Homo sapiens erythroblast macrophage protein EMP mRNA                      |
| 3037 | Q9H9V6           | 2                    | 4              | 9.6                   | 355    | 40410  | 8.8 | CDNA FLJ12524 fis, clone NT2RM2002145, moderately similar to Homo sapiens erythroblast macrophage protein EMP mRNA                      |
| 3037 | Q9BQ11           | 2                    | 4              | 8.8                   | 385    | 44171  | 8.8 | MAEA protein                                                                                                                            |
| 3037 | Q95285           | 2                    | 4              | 8.6                   | 395    | 43907  | 8.7 | Erythroblast macrophage protein EMP                                                                                                     |
| 3037 | Q9NW84           | 2                    | 4              | 8.6                   | 396    | 45315  | 8.7 | CDNA FLJ10226 fis, clone HEMBB1000037, moderately similar to Homo sapiens erythroblast macrophage protein EMP mRNA                      |
| 3037 | Q7L5Y9           | 2                    | 4              | 8.6                   | 396    | 45287  | 8.7 | Macrophage erythroblast attacher                                                                                                        |
| 3038 | Q5VU10           | 2                    | 2              | 10.8                  | 212    | 23286  | 9   | Ribonuclease P                                                                                                                          |
| 3038 | Q5VU11           | 2                    | 2              | 9.1                   | 254    | 28112  | 9.2 | Ribonuclease P                                                                                                                          |
| 3038 | UPI00001F9391    | 2                    | 2              | 8.9                   | 258    | 28280  | 8.9 | Ribonuclease P protein subunit p30 (EC 3.1.26.5) (RNaseP protein p30) (RNase P subunit 2).                                              |

| No.  | Accession Number | Unique Peptide Count | Spectrum Count | Sequence Coverage (%) | Length | MolWt | pI   | Descriptive Name                                                                                                                                          |
|------|------------------|----------------------|----------------|-----------------------|--------|-------|------|-----------------------------------------------------------------------------------------------------------------------------------------------------------|
| 3038 | P78346           | 2                    | 2              | 8.6                   | 268    | 29321 | 8.9  | Ribonuclease P protein subunit p30                                                                                                                        |
| 3039 | Q9H0P0           | 2                    | 6              | 8.6                   | 336    | 37948 | 7.1  | Cytosolic 5'-nucleotidase III                                                                                                                             |
| 3040 | O75251           | 2                    | 4              | 8.5                   | 213    | 23564 | 10   | NADH dehydrogenase [ubiquinone] iron-sulfur protein 7, mitochondrial precursor                                                                            |
| 3040 | UPI0000130964    | 2                    | 4              | 8.5                   | 213    | 23580 | 10   | NADH-ubiquinone oxidoreductase Fe-S protein 7                                                                                                             |
| 3040 | Q8NAS7           | 2                    | 4              | 8.5                   | 213    | 22962 | 9.4  | CDNA FLJ34850 fis, clone NT2NE2011758, highly similar to NADH- UBIQUINONE OXIDOREDUCTASE 20 kDa SUBUNIT                                                   |
| 3041 | Q53G11           | 2                    | 2              | 8.5                   | 340    | 36594 | 6.8  | Serine racemase variant                                                                                                                                   |
| 3041 | Q9GZT4           | 2                    | 2              | 8.5                   | 340    | 36566 | 6.5  | Serine racemase                                                                                                                                           |
| 3042 | Q9BRQ6           | 2                    | 2              | 8.5                   | 235    | 26458 | 8.9  | Coiled-coil-helix-coiled-coil-helix domain-containing protein 6                                                                                           |
| 3043 | Q9NRG7-2         | 2                    | 3              | 8.5                   | 293    | 31077 | 9    | Isoform 2 of Q9NRG7                                                                                                                                       |
| 3043 | UPI000059D223    | 2                    | 3              | 8.5                   | 293    | 31077 | 9    | hypothetical protein LOC56948                                                                                                                             |
| 3044 | Q9NUQ2           | 2                    | 6              | 8.5                   | 364    | 42072 | 9.1  | 1-acyl-sn-glycerol-3-phosphate acyltransferase epsilon                                                                                                    |
| 3045 | UPI000011DC0B    | 2                    | 2              | 12.2                  | 312    | 34866 | 6.5  | Caspase-2 precursor (EC 3.4.22.-) (CASP-2) (ICH-1 protease) (ICH- 1L/1S) [Contains: Caspase-2 subunit p18; Caspase-2 subunit p13; Caspase-2 subunit p12]. |
| 3045 | P42575-2         | 2                    | 2              | 12.1                  | 313    | 34923 | 6.5  | Isoform ICH                                                                                                                                               |
| 3045 | P42575           | 2                    | 2              | 8.4                   | 452    | 50685 | 6.8  | Caspase-2 precursor (EC 3.4.22.55) (CASP-2) (ICH-1 protease) (ICH- 1L/1S) [Contains: Caspase-2 subunit p18; Caspase-2 subunit p13; Caspase-2 subunit p12] |
| 3046 | P46734-2         | 2                    | 5              | 9.1                   | 318    | 36173 | 6.3  | Isoform 1 of P46734                                                                                                                                       |
| 3046 | P46734           | 2                    | 5              | 8.4                   | 347    | 39318 | 7.4  | Dual specificity mitogen-activated protein kinase kinase 3                                                                                                |
| 3046 | Q6FHG1           | 2                    | 5              | 8.4                   | 347    | 39265 | 7.1  | MAP2K3 protein                                                                                                                                            |
| 3046 | UPI000013D199    | 2                    | 5              | 8.3                   | 351    | 39853 | 7.5  | Dual specificity mitogen-activated protein kinase kinase 3 (EC 2.7.12.2) (MAP kinase kinase 3) (MAPKK 3) (MAPK/ERK kinase 3).                             |
| 3046 | P46734-3         | 2                    | 5              | 8.2                   | 352    | 39940 | 7.5  | Isoform 2 of P46734                                                                                                                                       |
| 3047 | UPI00001F6D70    | 2                    | 3              | 9.8                   | 244    | 28228 | 4.9  | CCR4-NOT transcription complex, subunit 7 isoform 2                                                                                                       |
| 3047 | Q96IQ6           | 2                    | 3              | 9.8                   | 246    | 28364 | 4.8  | CNOT7 protein                                                                                                                                             |
| 3047 | Q7Z530           | 2                    | 3              | 8.4                   | 285    | 32815 | 4.8  | CAF1                                                                                                                                                      |
| 3047 | Q9UIV1           | 2                    | 3              | 8.4                   | 285    | 32745 | 4.8  | CCR4-NOT transcription complex subunit 7                                                                                                                  |
| 3048 | P50750           | 2                    | 2              | 8.3                   | 372    | 42778 | 8.8  | Cell division protein kinase 9                                                                                                                            |
| 3049 | Q7L5D6           | 2                    | 5              | 8.3                   | 327    | 36504 | 5.4  | UPF0363 protein C7orf20                                                                                                                                   |
| 3050 | Q8NFH4           | 2                    | 3              | 8.3                   | 326    | 36708 | 5.9  | Nucleoporin Nup37                                                                                                                                         |
| 3051 | Q9Y375           | 2                    | 2              | 8.3                   | 327    | 37764 | 7.6  | Complex I intermediate-associated protein 30, mitochondrial precursor                                                                                     |
| 3052 | P05121           | 2                    | 5              | 8.2                   | 402    | 45060 | 7.2  | Plasminogen activator inhibitor 1 precursor                                                                                                               |
| 3053 | Q5TZ92           | 2                    | 2              | 8.9                   | 291    | 33150 | 6    | Novel protein                                                                                                                                             |
| 3053 | UPI0000D61E00    | 2                    | 2              | 8.8                   | 297    | 33814 | 6.3  | BRCA1/BRCA2-containing complex subunit 3.                                                                                                                 |
| 3053 | P46736           | 2                    | 2              | 8.2                   | 316    | 36072 | 5.9  | BRCA1/BRCA2-containing complex subunit 3                                                                                                                  |
| 3053 | UPI0000D61DFF    | 2                    | 2              | 8.1                   | 322    | 36736 | 6.3  | BRCA1/BRCA2-containing complex subunit 3.                                                                                                                 |
| 3054 | Q3B781           | 2                    | 2              | 8.2                   | 245    | 27979 | 5.3  | CCDC90B protein                                                                                                                                           |
| 3054 | Q9GZU6           | 2                    | 2              | 7.9                   | 254    | 29506 | 7.5  | Hypothetical protein DKFZp434F1919                                                                                                                        |
| 3054 | Q9GZT6           | 2                    | 2              | 7.9                   | 254    | 29472 | 7.5  | MDS011                                                                                                                                                    |
| 3055 | UPI00006C03F3    | 2                    | 3              | 10.4                  | 241    | 27027 | 4.9  | PREDICTED: hypothetical protein                                                                                                                           |
| 3055 | Q658P1           | 2                    | 3              | 8.2                   | 304    | 34805 | 6.6  | Hypothetical protein DKFZp666C185                                                                                                                         |
| 3055 | UPI000013EF67    | 2                    | 3              | 8.2                   | 306    | 34925 | 6.7  | PREDICTED: hypothetical protein LOC64853                                                                                                                  |
| 3055 | Q9H9E8           | 2                    | 3              | 8.2                   | 306    | 34951 | 6.7  | CDNA FLJ12806 fis, clone NT2RP2002235                                                                                                                     |
| 3055 | Q96BJ3           | 2                    | 3              | 8.2                   | 306    | 35023 | 6.6  | Uncharacterized protein C1orf80                                                                                                                           |
| 3056 | Q86TR7           | 2                    | 8              | 8.2                   | 279    | 30962 | 4.8  | Uncharacterized protein C14orf151                                                                                                                         |
| 3057 | Q96H20-2         | 2                    | 7              | 8.2                   | 257    | 28736 | 6.4  | Isoform 2 of Q96H20                                                                                                                                       |
| 3057 | Q96H20           | 2                    | 7              | 8.1                   | 258    | 28864 | 6.7  | Vacuolar sorting protein SNF8                                                                                                                             |
| 3058 | UPI00004DFE95    | 2                    | 3              | 10.2                  | 197    | 22995 | 8.9  | Protein NipSnap3A (NipSnap4) (Target for Salmonella secreted protein C) (TassC).                                                                          |
| 3058 | Q9UFN0           | 2                    | 3              | 8.1                   | 247    | 28467 | 9.2  | Protein NipSnap3A                                                                                                                                         |
| 3059 | O60711           | 2                    | 2              | 8                     | 386    | 43332 | 6    | Leupaxin                                                                                                                                                  |
| 3059 | Q6FI07           | 2                    | 2              | 8                     | 386    | 43336 | 6    | LPXN protein                                                                                                                                              |
| 3060 | P53990-2         | 2                    | 3              | 8.7                   | 335    | 36622 | 5.4  | Isoform 2 of P53990                                                                                                                                       |
| 3060 | P53990-3         | 2                    | 3              | 8.1                   | 360    | 39928 | 7.8  | Isoform 3 of P53990                                                                                                                                       |
| 3060 | P53990           | 2                    | 3              | 8                     | 364    | 39751 | 5.3  | Uncharacterized protein KIAA0174                                                                                                                          |
| 3060 | Q3SYM4           | 2                    | 3              | 7.9                   | 366    | 39979 | 5.3  | KIAA0174 protein                                                                                                                                          |
| 3061 | Q96BI2           | 2                    | 2              | 13                    | 215    | 24190 | 10.9 | ARL6IP4 protein                                                                                                                                           |
| 3061 | Q9P2R9           | 2                    | 2              | 12.8                  | 218    | 24592 | 10.9 | SRp25 nuclear protein                                                                                                                                     |
| 3061 | UPI00003E1F8A    | 2                    | 2              | 8.2                   | 341    | 36612 | 11.2 | SRp25 nuclear protein isoform 2                                                                                                                           |
| 3061 | Q504R8           | 2                    | 2              | 8                     | 352    | 37648 | 11.2 | ADP-ribosylation-like factor 6 interacting protein 4                                                                                                      |
| 3061 | UPI00003E1F8B    | 2                    | 2              | 8                     | 352    | 37638 | 11.2 | SRp25 nuclear protein isoform 3                                                                                                                           |
| 3061 | Q66PJ3           | 2                    | 2              | 7.8                   | 360    | 38395 | 11.1 | ADP-ribosylation factor-like protein 6-interacting protein 4                                                                                              |
| 3061 | Q8TEM4           | 2                    | 2              | 6.5                   | 432    | 46514 | 11.5 | FLJ00169 protein                                                                                                                                          |
| 3062 | Q6ZWP6           | 2                    | 2              | 8                     | 288    | 31024 | 9.1  | CDNA FLJ90159 fis, clone HEMBB1002465, weakly similar to ACYL-COA DEHYDROGENASE                                                                           |

| No.  | Accession Number | Unique Peptide Count | Spectrum Count | Sequence Coverage (%) | Length | MolWt | pI   | Descriptive Name                                                                                                                              |
|------|------------------|----------------------|----------------|-----------------------|--------|-------|------|-----------------------------------------------------------------------------------------------------------------------------------------------|
| 3062 | Q9UKU7           | 2                    | 2              | 5.5                   | 415    | 45070 | 7.9  | Acyl-CoA dehydrogenase family member 8, mitochondrial precursor                                                                               |
| 3063 | Q8N1Q1           | 2                    | 2              | 8                     | 262    | 29443 | 7    | Carbonic anhydrase 13                                                                                                                         |
| 3064 | Q96I25           | 2                    | 4              | 8                     | 401    | 44962 | 6    | Splicing factor 45                                                                                                                            |
| 3065 | Q13867           | 2                    | 3              | 7.9                   | 455    | 52562 | 6.3  | Bleomycin hydrolase                                                                                                                           |
| 3066 | Q92785           | 2                    | 2              | 7.9                   | 391    | 44156 | 6.3  | Zinc-finger protein ubi-d4                                                                                                                    |
| 3067 | UPI0000DBEF1B    | 2                    | 2              | 8                     | 540    | 60102 | 8.4  | Cyclin-K.                                                                                                                                     |
| 3067 | UPI0000DBEF1A    | 2                    | 2              | 7.9                   | 547    | 60811 | 8.4  | Cyclin-K.                                                                                                                                     |
| 3068 | UPI0000D619C0    | 2                    | 3              | 9.3                   | 281    | 32456 | 6.8  | Leucine carboxyl methyltransferase 1 (EC 2.1.1.-) (Protein-leucine O- methyltransferase).                                                     |
| 3068 | UPI00005B2DFC    | 2                    | 3              | 9.3                   | 279    | 32172 | 6.3  | leucine carboxyl methyltransferase 1 isoform b                                                                                                |
| 3068 | Q9UIC8           | 2                    | 3              | 7.8                   | 334    | 38379 | 6    | Leucine carboxyl methyltransferase 1                                                                                                          |
| 3068 | UPI0000D619C1    | 2                    | 3              | 7.7                   | 338    | 38834 | 6.5  | Leucine carboxyl methyltransferase 1 (EC 2.1.1.-) (Protein-leucine O- methyltransferase).                                                     |
| 3068 | UPI0000D619C2    | 2                    | 3              | 7.3                   | 357    | 41116 | 7.6  | Leucine carboxyl methyltransferase 1 (EC 2.1.1.-) (Protein-leucine O- methyltransferase).                                                     |
| 3068 | Q9UIC8-2         | 2                    | 3              | 7.3                   | 357    | 41106 | 7    | Isoform 2 of Q9UIC8                                                                                                                           |
| 3069 | UPI0000DD80FD    | 2                    | 2              | 8.1                   | 258    | 27451 | 6.2  | PREDICTED: similar to Copper chaperone for superoxide dismutase (Superoxide dismutase copper chaperone)                                       |
| 3069 | O14618           | 2                    | 2              | 7.7                   | 274    | 29041 | 5.6  | Copper chaperone for superoxide dismutase                                                                                                     |
| 3069 | Q8NEV0           | 2                    | 2              | 7.7                   | 274    | 29027 | 5.6  | Superoxide dismutase copper chaperone                                                                                                         |
| 3070 | Q53G12           | 2                    | 2              | 7.7                   | 313    | 34188 | 5    | Testis expressed sequence 264 variant                                                                                                         |
| 3070 | Q9Y6I9           | 2                    | 2              | 7.7                   | 313    | 34189 | 4.9  | Testis-expressed sequence 264 protein precursor                                                                                               |
| 3071 | Q6P147           | 2                    | 8              | 7.7                   | 286    | 31668 | 8.8  | Cytochrome b reductase 1                                                                                                                      |
| 3071 | Q9H0Q8           | 2                    | 8              | 7.7                   | 286    | 31638 | 9    | Hypothetical protein DKFZp564E227                                                                                                             |
| 3072 | Q8WUY3           | 2                    | 3              | 7.7                   | 259    | 29491 | 4.9  | Uncharacterized protein C9orf65                                                                                                               |
| 3073 | UPI0000DD8590    | 2                    | 3              | 7.7                   | 337    | 36661 | 8.4  | PREDICTED: hypothetical protein LOC140731                                                                                                     |
| 3074 | A2NHL9           | 2                    | 2              | 7.6                   | 331    | 38056 | 6.6  | Mih1/TX isoform beta                                                                                                                          |
| 3074 | P49662           | 2                    | 2              | 6.6                   | 377    | 43262 | 6    | Caspase-4 precursor (EC 3.4.22.57) (CASP-4) (ICH-2 protease) (TX protease) (ICE(rel)-II) [Contains: Caspase-4 subunit 1; Caspase-4 subunit 2] |
| 3075 | Q13371           | 2                    | 2              | 7.6                   | 301    | 34282 | 4.7  | Phosducin-like protein                                                                                                                        |
| 3076 | Q53T37           | 2                    | 4              | 7.6                   | 262    | 29844 | 7.8  | Hypothetical protein FLJ21820                                                                                                                 |
| 3076 | Q9H6V9           | 2                    | 4              | 6.2                   | 325    | 37319 | 6.5  | Uncharacterized protein C2orf43                                                                                                               |
| 3077 | Q92665           | 2                    | 2              | 7.6                   | 395    | 45319 | 9.3  | 28S ribosomal protein S31, mitochondrial precursor                                                                                            |
| 3077 | UPI0000167B37    | 2                    | 2              | 7.6                   | 395    | 45318 | 9.4  | mitochondrial ribosomal protein S31                                                                                                           |
| 3078 | Q96E11-3         | 2                    | 2              | 9.2                   | 218    | 24115 | 9.6  | Isoform 3 of Q96E11                                                                                                                           |
| 3078 | Q96E11           | 2                    | 2              | 7.6                   | 262    | 29277 | 9.8  | Ribosome recycling factor, mitochondrial precursor                                                                                            |
| 3079 | Q96G23           | 2                    | 5              | 7.6                   | 380    | 44876 | 9    | LAG1 longevity assurance homolog 2                                                                                                            |
| 3080 | Q9Y312           | 2                    | 2              | 7.8                   | 384    | 43472 | 6    | Uncharacterized protein C2orf4                                                                                                                |
| 3080 | A2A2Q9           | 2                    | 2              | 7.5                   | 398    | 45034 | 7.5  | Chromosome 20 open reading frame 4                                                                                                            |
| 3081 | Q5JTE4           | 2                    | 3              | 8.3                   | 314    | 35838 | 5.7  | OTTHUMP00000016471                                                                                                                            |
| 3081 | O15160-2         | 2                    | 3              | 7.6                   | 342    | 38647 | 6    | Isoform 2 of O15160                                                                                                                           |
| 3081 | O15160           | 2                    | 3              | 7.5                   | 346    | 39250 | 5.5  | DNA-directed RNA polymerase I 40 kDa polypeptide                                                                                              |
| 3082 | UPI000041C169    | 2                    | 24             | 10.7                  | 159    | 17764 | 6.3  | CD9 antigen (p24) (Leukocyte antigen MIC3) (Motility-related protein) (MRP-1) (Tetraspanin-29) (Tspan-29).                                    |
| 3082 | P21926           | 2                    | 24             | 7.5                   | 228    | 25416 | 7.1  | CD9 antigen                                                                                                                                   |
| 3083 | Q8IVD9           | 2                    | 2              | 7.5                   | 361    | 40822 | 5.3  | NudC domain-containing protein 3                                                                                                              |
| 3084 | O95639-3         | 2                    | 4              | 8.2                   | 243    | 27419 | 8.2  | Isoform 3 of O95639                                                                                                                           |
| 3084 | O95639-2         | 2                    | 4              | 8.2                   | 244    | 27547 | 8.2  | Isoform 2 of O95639                                                                                                                           |
| 3084 | O95639           | 2                    | 4              | 7.4                   | 269    | 30255 | 8.3  | Cleavage and polyadenylation specificity factor subunit 4                                                                                     |
| 3085 | Q53GB1           | 2                    | 4              | 7.4                   | 338    | 38124 | 9.5  | Solute carrier family 25 member 40                                                                                                            |
| 3085 | Q8TBP6           | 2                    | 4              | 7.4                   | 338    | 38125 | 9.4  | Solute carrier family 25, member 40                                                                                                           |
| 3086 | Q8TBX8           | 2                    | 3              | 7.4                   | 421    | 47328 | 6.8  | Phosphatidylinositol-4-phosphate 5-kinase type II gamma                                                                                       |
| 3086 | UPI000003F553    | 2                    | 3              | 7.4                   | 421    | 47300 | 6.8  | phosphatidylinositol-4-phosphate 5-kinase, type II, gamma                                                                                     |
| 3087 | Q9BY49           | 2                    | 2              | 7.3                   | 303    | 32544 | 8.8  | Peroxisomal trans-2-enoyl-CoA reductase                                                                                                       |
| 3087 | UPI0000D612AC    | 2                    | 2              | 7.3                   | 302    | 32380 | 8.8  | Peroxisomal trans-2-enoyl-CoA reductase (EC 1.3.1.38) (TERP) (HPDHase) (pVI-ARL) (2,4-dienoyl-CoA reductase-related protein) (DCR-RP).        |
| 3088 | Q9NTM9           | 2                    | 2              | 7.3                   | 273    | 29341 | 8.2  | Copper homeostasis protein cutC homolog                                                                                                       |
| 3088 | UPI0000070B78    | 2                    | 2              | 7.3                   | 273    | 29311 | 7.9  | cutC copper transporter homolog                                                                                                               |
| 3089 | UPI0000367289    | 2                    | 2              | 7.3                   | 288    | 30752 | 11.2 | Heparin-binding growth factor 2 precursor (HBGF-2) (Basic fibroblast growth factor) (BFGF) (Prostatropin).                                    |
| 3090 | Q9BSP1           | 2                    | 2              | 7.4                   | 378    | 41969 | 9.2  | GTPBP10 protein                                                                                                                               |
| 3090 | A4D1E9           | 2                    | 2              | 7.2                   | 387    | 42933 | 9    | Hypothetical protein LOC85865                                                                                                                 |
| 3090 | Q8N982           | 2                    | 2              | 7.2                   | 387    | 43016 | 9.1  | CDNA FLJ38242 fis, clone FCBBF2006781, weakly similar to SPO0B- ASSOCIATED GTP-BINDING PROTEIN                                                |
| 3090 | Q3B7A6           | 2                    | 2              | 7.2                   | 387    | 42917 | 9    | GTP-binding protein 10                                                                                                                        |
| 3091 | O75525-2         | 2                    | 2              | 9.2                   | 271    | 30250 | 9.5  | Isoform 2 of O75525                                                                                                                           |
| 3091 | O75525           | 2                    | 2              | 7.2                   | 346    | 38800 | 7.6  | KH domain-containing, RNA-binding, signal transduction-associated protein 3                                                                   |



| No.  | Accession Number | Unique Peptide Count | Spectrum Count | Sequence Coverage (%) | Length | MolWt | pI  | Descriptive Name                                                                                                                                         |
|------|------------------|----------------------|----------------|-----------------------|--------|-------|-----|----------------------------------------------------------------------------------------------------------------------------------------------------------|
| 3092 | Q86YA9           | 2                    | 2              | 7.2                   | 552    | 61379 | 6   | Golgi associated, gamma adaptin ear containing, ARF binding protein 1                                                                                    |
| 3092 | Q9UJY5           | 2                    | 2              | 6.3                   | 639    | 70384 | 5.3 | ADP-ribosylation factor-binding protein GGA1                                                                                                             |
| 3093 | Q96AZ0           | 2                    | 20             | 7.2                   | 373    | 43759 | 8.8 | CLPTM1L protein                                                                                                                                          |
| 3093 | Q96KA5           | 2                    | 20             | 5                     | 538    | 62229 | 8.6 | CLPTM1-like protein                                                                                                                                      |
| 3094 | Q9BXK5           | 2                    | 2              | 7.2                   | 485    | 52723 | 4.4 | Bcl-2-like 13 protein                                                                                                                                    |
| 3095 | Q9UBP6           | 2                    | 3              | 7.2                   | 276    | 31471 | 7.6 | tRNA (guanine-N(7)-methyltransferase (EC 2.1.1.33) (tRNA(m7G46)-methyltransferase)                                                                       |
| 3096 | UPI0000D61CD4    | 2                    | 5              | 7.9                   | 430    | 47710 | 5.1 | Nuclear-interacting partner of ALK (Nuclear-interacting partner of anaplastic lymphoma kinase) (hNIPA) (Zinc finger C3HC-type protein 1).                |
| 3096 | Q86WB0-3         | 2                    | 5              | 7.9                   | 431    | 47771 | 5.2 | Isoform 3 of Q86WB0                                                                                                                                      |
| 3096 | A4D1L4           | 2                    | 5              | 7.1                   | 481    | 53603 | 6.2 | Nuclear interacting partner of anaplastic lymphoma kinase                                                                                                |
| 3096 | UPI0000457601    | 2                    | 5              | 7.1                   | 480    | 53498 | 6.2 | Nuclear-interacting partner of ALK (Nuclear-interacting partner of anaplastic lymphoma kinase) (hNIPA) (Zinc finger C3HC-type protein 1).                |
| 3096 | Q86WB0-2         | 2                    | 5              | 7.1                   | 481    | 53559 | 6.4 | Isoform 2 of Q86WB0                                                                                                                                      |
| 3096 | UPI0000457602    | 2                    | 5              | 6.8                   | 501    | 55200 | 5.5 | Nuclear-interacting partner of ALK (Nuclear-interacting partner of anaplastic lymphoma kinase) (hNIPA) (Zinc finger C3HC-type protein 1).                |
| 3096 | Q86WB0           | 2                    | 5              | 6.8                   | 502    | 55262 | 5.6 | Nuclear-interacting partner of ALK                                                                                                                       |
| 3097 | UPI0000470117    | 2                    | 6              | 13.1                  | 183    | 21384 | 4.9 | Cell division cycle protein 123 homolog (Protein D123) (HT-1080) (PZ32).                                                                                 |
| 3097 | UPI0000470118    | 2                    | 6              | 8.1                   | 295    | 33891 | 4.6 | Cell division cycle protein 123 homolog (Protein D123) (HT-1080) (PZ32).                                                                                 |
| 3097 | O75794           | 2                    | 6              | 7.1                   | 336    | 39135 | 4.8 | Cell division cycle protein 123 homolog                                                                                                                  |
| 3097 | UPI0000072E2F    | 2                    | 6              | 7.1                   | 336    | 39188 | 4.9 | D123 gene product                                                                                                                                        |
| 3097 | UPI0000D60F09    | 2                    | 6              | 6.7                   | 359    | 41283 | 6   | Cell division cycle protein 123 homolog (Protein D123) (HT-1080) (PZ32).                                                                                 |
| 3098 | P82673           | 2                    | 6              | 7.1                   | 323    | 36844 | 8.2 | 28S ribosomal protein S35, mitochondrial precursor                                                                                                       |
| 3099 | Q5SW96           | 2                    | 2              | 7.1                   | 308    | 33885 | 6.7 | Low density lipoprotein receptor adapter protein 1                                                                                                       |
| 3100 | Q96EM0           | 2                    | 2              | 7.1                   | 354    | 38168 | 6.6 | Uncharacterized protein C14orf149                                                                                                                        |
| 3100 | Q96LJ5           | 2                    | 2              | 7.1                   | 354    | 38138 | 6.7 | CDNA FLJ25436 fis, clone TST08261                                                                                                                        |
| 3101 | Q9BX67           | 2                    | 2              | 7.1                   | 310    | 35020 | 7.6 | Junctional adhesion molecule C precursor                                                                                                                 |
| 3102 | Q9Y371           | 2                    | 3              | 7.1                   | 365    | 40796 | 6   | SH3 domain GRB2-like protein B1                                                                                                                          |
| 3102 | Q9Y371-2         | 2                    | 3              | 6.7                   | 386    | 43196 | 5.7 | Isoform 2 of Q9Y371                                                                                                                                      |
| 3103 | O43772           | 2                    | 2              | 7                     | 301    | 32944 | 9.4 | Mitochondrial carnitine/acylcarnitine carrier protein                                                                                                    |
| 3104 | UPI0000EDA44A    | 2                    | 3              | 12.1                  | 173    | 19704 | 5.1 | SCO1 protein homolog, mitochondrial                                                                                                                      |
| 3104 | O75880           | 2                    | 3              | 7                     | 301    | 33814 | 8.9 | SCO1 protein homolog, mitochondrial precursor                                                                                                            |
| 3105 | P61962           | 2                    | 2              | 7                     | 342    | 38926 | 5.5 | WD repeat protein 68                                                                                                                                     |
| 3105 | UPI000013D01D    | 2                    | 2              | 7                     | 341    | 38855 | 5.5 | WD repeat protein 68 (WD repeat protein An11 homolog).                                                                                                   |
| 3106 | Q9Y2G5-2         | 2                    | 3              | 7.9                   | 380    | 44083 | 6.5 | Isoform B of Q9Y2G5                                                                                                                                      |
| 3106 | Q9Y2G5-1         | 2                    | 3              | 7.1                   | 424    | 48896 | 6.8 | Isoform A of Q9Y2G5                                                                                                                                      |
| 3106 | Q9Y2G5           | 2                    | 3              | 7                     | 429    | 49976 | 6.6 | GDP-fucose protein O-fucosyltransferase 2 precursor                                                                                                      |
| 3107 | Q8IUB6           | 2                    | 2              | 21.1                  | 109    | 12386 | 8.1 | CD95 antigen                                                                                                                                             |
| 3107 | Q5T9P2           | 2                    | 2              | 7.3                   | 314    | 35386 | 7.9 | Fas                                                                                                                                                      |
| 3107 | P25445           | 2                    | 2              | 6.9                   | 335    | 37732 | 7.9 | Tumor necrosis factor receptor superfamily member 6 precursor                                                                                            |
| 3107 | Q6ICT6           | 2                    | 2              | 6.9                   | 335    | 37702 | 7.9 | TNFRSF6 protein                                                                                                                                          |
| 3107 | UPI0000D60F8D    | 2                    | 2              | 6.4                   | 362    | 40667 | 8.2 | Tumor necrosis factor receptor superfamily member 6 precursor (FASLG receptor) (Apoptosis-mediating surface antigen FAS) (Apo-1 antigen) (CD95 antigen). |
| 3107 | Q59FU8           | 2                    | 2              | 6.4                   | 362    | 40494 | 8.1 | Tumor necrosis factor receptor superfamily, member 6 isoform 1 variant                                                                                   |
| 3108 | P50579           | 2                    | 2              | 6.9                   | 478    | 52892 | 5.8 | Methionine aminopeptidase 2                                                                                                                              |
| 3109 | Q53EZ4-2         | 2                    | 2              | 8                     | 400    | 46803 | 7.9 | Isoform 2 of Q53EZ4                                                                                                                                      |
| 3109 | Q53EZ4           | 2                    | 2              | 6.9                   | 464    | 54124 | 7   | Centrosomal protein of 55 kDa                                                                                                                            |
| 3110 | Q92575           | 2                    | 3              | 6.9                   | 508    | 56778 | 6.4 | UBX domain-containing protein 2                                                                                                                          |
| 3111 | O43819           | 2                    | 5              | 6.8                   | 266    | 29810 | 8.9 | SCO2 protein homolog, mitochondrial precursor                                                                                                            |
| 3111 | UPI0000167B35    | 2                    | 5              | 6.8                   | 266    | 29751 | 8.6 | cytochrome oxidase deficient homolog 2                                                                                                                   |
| 3112 | Q8WU61           | 2                    | 2              | 6.8                   | 442    | 49967 | 4.8 | Uncharacterized protein C5orf22                                                                                                                          |
| 3112 | Q9NUR1           | 2                    | 2              | 6.8                   | 442    | 49977 | 4.8 | CDNA FLJ11193 fis, clone PLACE1007621                                                                                                                    |
| 3113 | Q5U622           | 2                    | 3              | 6.7                   | 537    | 60492 | 5.1 | Adenylate kinase 5                                                                                                                                       |
| 3113 | UPI0000167E21    | 2                    | 3              | 6.7                   | 536    | 60315 | 5.1 | adenylate kinase 5 isoform 2                                                                                                                             |
| 3113 | Q86YS0           | 2                    | 3              | 6.7                   | 536    | 60277 | 5.1 | Adenylate kinase 6                                                                                                                                       |
| 3113 | UPI0000D61F49    | 2                    | 3              | 6.4                   | 564    | 63535 | 5.1 | Adenylate kinase isoenzyme 5 (EC 2.7.4.3) (ATP-AMP transphosphorylase).                                                                                  |
| 3113 | UPI0000167E20    | 2                    | 3              | 6.4                   | 562    | 63333 | 5.1 | adenylate kinase 5 isoform 1                                                                                                                             |
| 3113 | Q8N464           | 2                    | 3              | 6.4                   | 562    | 63279 | 5.1 | Adenylate kinase 5                                                                                                                                       |
| 3113 | Q7Z4T5           | 2                    | 3              | 6.4                   | 563    | 63446 | 5.1 | Hypothetical protein                                                                                                                                     |
| 3114 | Q8NEJ9-2         | 2                    | 3              | 6.8                   | 311    | 35250 | 9.3 | Isoform 2 of Q8NEJ9                                                                                                                                      |
| 3114 | Q8NEJ9           | 2                    | 3              | 6.7                   | 315    | 35894 | 9.6 | Neuroguidin                                                                                                                                              |
| 3115 | Q96NA3           | 2                    | 3              | 6.7                   | 434    | 48705 | 8.9 | CDNA FLJ31187 fis, clone KIDNE2000349, moderately similar to Mus musculus putative lysophosphatidic acid acyltransferase mRNA                            |

| No.  | Accession Number | Unique Peptide Count | Spectrum Count | Sequence Coverage (%) | Length | MolWt | pI   | Descriptive Name                                                                                                                                                                                                                                       |
|------|------------------|----------------------|----------------|-----------------------|--------|-------|------|--------------------------------------------------------------------------------------------------------------------------------------------------------------------------------------------------------------------------------------------------------|
| 3116 | Q96S11           | 2                    | 3              | 6.7                   | 283    | 31942 | 7.4  | BTB/POZ domain-containing protein KCTD15                                                                                                                                                                                                               |
| 3117 | Q9H425           | 2                    | 3              | 6.7                   | 327    | 36346 | 5.7  | Uncharacterized protein C1orf198                                                                                                                                                                                                                       |
| 3118 | Q9Y639-3         | 2                    | 7              | 6.8                   | 278    | 30835 | 7.8  | Isoform 3 of Q9Y639                                                                                                                                                                                                                                    |
| 3118 | Q9Y639           | 2                    | 7              | 6.7                   | 282    | 31291 | 6.9  | Neuroplastin precursor                                                                                                                                                                                                                                 |
| 3118 | Q9Y639-4         | 2                    | 7              | 5.6                   | 337    | 37792 | 7.4  | Isoform 4 of Q9Y639                                                                                                                                                                                                                                    |
| 3118 | UPI0000D6136C    | 2                    | 7              | 4.8                   | 392    | 43385 | 7.8  | Neuroplastin precursor (Stromal cell-derived receptor 1) (SDR-1).                                                                                                                                                                                      |
| 3118 | Q9Y639-2         | 2                    | 7              | 4.8                   | 398    | 44387 | 8    | Isoform 2 of Q9Y639                                                                                                                                                                                                                                    |
| 3119 | Q5T4U8           | 2                    | 6              | 14.5                  | 152    | 17318 | 5.5  | Rab geranylgeranyltransferase, beta subunit                                                                                                                                                                                                            |
| 3119 | UPI0000D61F47    | 2                    | 6              | 6.9                   | 321    | 35983 | 5.5  | Geranylgeranyl transferase type-2 subunit beta (EC 2.5.1.60) (Geranylgeranyl transferase type II subunit beta) (Rab geranylgeranyltransferase subunit beta) (Rab geranyl- geranyltransferase subunit beta) (Rab GG transferase beta) (Rab GGase beta). |
| 3119 | Q59GT6           | 2                    | 6              | 6.9                   | 320    | 35915 | 5.4  | Rab geranylgeranyltransferase, beta subunit variant                                                                                                                                                                                                    |
| 3119 | P53611           | 2                    | 6              | 6.6                   | 331    | 36924 | 5    | Geranylgeranyl transferase type-2 subunit beta                                                                                                                                                                                                         |
| 3119 | UPI0000D61F46    | 2                    | 6              | 6.6                   | 332    | 36992 | 5.1  | Geranylgeranyl transferase type-2 subunit beta (EC 2.5.1.60) (Geranylgeranyl transferase type II subunit beta) (Rab geranylgeranyltransferase subunit beta) (Rab geranyl- geranyltransferase subunit beta) (Rab GG transferase beta) (Rab GGase beta). |
| 3120 | P53985           | 2                    | 4              | 6.6                   | 500    | 53958 | 8.7  | Monocarboxylate transporter 1                                                                                                                                                                                                                          |
| 3121 | UPI0000072D91    | 2                    | 2              | 8.8                   | 274    | 31404 | 4.9  | hypothetical protein LOC55148 isoform 1                                                                                                                                                                                                                |
| 3121 | Q05DA8           | 2                    | 2              | 6.6                   | 361    | 41243 | 5.1  | C14orf130 protein                                                                                                                                                                                                                                      |
| 3121 | UPI000006DD14    | 2                    | 2              | 5.6                   | 425    | 47996 | 4.9  | hypothetical protein LOC55148 isoform 2                                                                                                                                                                                                                |
| 3121 | Q8N806           | 2                    | 2              | 5.6                   | 425    | 47999 | 4.8  | Uncharacterized protein C14orf130                                                                                                                                                                                                                      |
| 3122 | Q5TCL9           | 2                    | 3              | 17.2                  | 151    | 17801 | 5.5  | Wilms tumor 1 associated protein                                                                                                                                                                                                                       |
| 3122 | Q15007           | 2                    | 3              | 6.6                   | 396    | 44244 | 5.2  | Wilms' tumor 1-associating protein (WT1-associated protein) (Putative pre-mRNA-splicing regulator female-lethal(2D) homolog)                                                                                                                           |
| 3123 | Q8WUX9           | 2                    | 7              | 6.6                   | 453    | 50911 | 5.3  | Protein CHMP7                                                                                                                                                                                                                                          |
| 3124 | UPI0000F24436    | 2                    | 2              | 7.2                   | 400    | 45523 | 6.8  | 2-OXOISOVALERATE DEHYDROGENASE ALPHA SUBUNIT                                                                                                                                                                                                           |
| 3124 | P12694           | 2                    | 2              | 6.5                   | 445    | 50471 | 8.3  | 2-oxoisovalerate dehydrogenase subunit alpha, mitochondrial precursor                                                                                                                                                                                  |
| 3124 | Q59EI3           | 2                    | 2              | 6.5                   | 444    | 50400 | 8.3  | Branched chain keto acid dehydrogenase E1, alpha polypeptide variant                                                                                                                                                                                   |
| 3124 | UPI0000D617AD    | 2                    | 2              | 6.1                   | 479    | 54203 | 6.4  | Transmembrane protein 91.                                                                                                                                                                                                                              |
| 3124 | Q6ZSA3           | 2                    | 2              | 6.1                   | 479    | 54131 | 6.5  | CDNA FLJ45695 fis, clone FEBRA2013570, highly similar to 2- oxoisovalerate dehydrogenase alpha subunit, mitochondrial                                                                                                                                  |
| 3125 | Q59FW7           | 2                    | 4              | 7.7                   | 272    | 31652 | 8.5  | Cyclin H variant                                                                                                                                                                                                                                       |
| 3125 | P51946           | 2                    | 4              | 6.5                   | 323    | 37643 | 7.2  | Cyclin-H                                                                                                                                                                                                                                               |
| 3125 | Q53X72           | 2                    | 4              | 6.5                   | 323    | 37615 | 7.2  | CCNH protein                                                                                                                                                                                                                                           |
| 3126 | Q53YPO           | 2                    | 2              | 6.5                   | 478    | 54417 | 10.4 | PreS1 binding protein                                                                                                                                                                                                                                  |
| 3126 | Q9NZM5           | 2                    | 2              | 6.5                   | 478    | 54389 | 10.3 | Glioma tumor suppressor candidate region gene 2 protein                                                                                                                                                                                                |
| 3126 | Q96CS0           | 2                    | 2              | 6.5                   | 476    | 54215 | 10.4 | GLTSCR2 protein                                                                                                                                                                                                                                        |
| 3126 | Q7L4X7           | 2                    | 2              | 6.5                   | 474    | 54087 | 10.4 | Glioma tumor suppressor candidate region gene 2                                                                                                                                                                                                        |
| 3127 | Q9H0E2           | 2                    | 4              | 8.4                   | 274    | 30282 | 6    | Toll-interacting protein                                                                                                                                                                                                                               |
| 3127 | Q59FB9           | 2                    | 4              | 6.5                   | 352    | 38895 | 8.5  | Toll interacting protein variant                                                                                                                                                                                                                       |
| 3127 | UPI0000D6257D    | 2                    | 4              | 6.5                   | 355    | 39151 | 8.8  | Toll-interacting protein.                                                                                                                                                                                                                              |
| 3128 | Q86TV2           | 2                    | 2              | 7.5                   | 372    | 42008 | 6.2  | Full-length cDNA clone CS0DI002YH20 of Placenta of Homo sapiens                                                                                                                                                                                        |
| 3128 | Q86TV3           | 2                    | 2              | 7.4                   | 376    | 42948 | 6.4  | Full-length cDNA clone CS0DB001YK19 of Neuroblastoma of Homo sapiens                                                                                                                                                                                   |
| 3128 | Q6I9U9           | 2                    | 2              | 6.5                   | 433    | 49353 | 6.6  | LGMN protein                                                                                                                                                                                                                                           |
| 3128 | Q99538           | 2                    | 2              | 6.5                   | 433    | 49411 | 6.6  | Legumain precursor                                                                                                                                                                                                                                     |
| 3129 | Q8NFF5           | 2                    | 3              | 6.5                   | 587    | 65266 | 6.9  | FAD1 flavin adenine dinucleotide synthetase homolog                                                                                                                                                                                                    |
| 3130 | Q9C0B1           | 2                    | 3              | 6.5                   | 507    | 58456 | 5.2  | KIAA1752 protein                                                                                                                                                                                                                                       |
| 3130 | UPI000013D7B3    | 2                    | 3              | 6.5                   | 505    | 58282 | 5.2  | fatso                                                                                                                                                                                                                                                  |
| 3131 | O75381           | 2                    | 2              | 6.4                   | 377    | 41237 | 4.9  | Peroxisomal membrane protein PEX14                                                                                                                                                                                                                     |
| 3132 | Q5TAA8           | 2                    | 2              | 6.4                   | 326    | 36433 | 6.6  | Hermansky-Pudlak syndrome 1                                                                                                                                                                                                                            |
| 3132 | Q658M9           | 2                    | 2              | 6.2                   | 338    | 38870 | 9.4  | Hypothetical protein DKFZp666K145                                                                                                                                                                                                                      |
| 3132 | UPI000049DD09    | 2                    | 2              | 5.6                   | 376    | 42880 | 9.1  | Hermansky-Pudlak syndrome 1 protein.                                                                                                                                                                                                                   |
| 3132 | Q92902-4         | 2                    | 2              | 3.1                   | 680    | 76937 | 5.8  | Isoform IV of Q92902                                                                                                                                                                                                                                   |
| 3132 | Q92902-2         | 2                    | 2              | 3.1                   | 667    | 75877 | 5.7  | Isoform II of Q92902                                                                                                                                                                                                                                   |
| 3132 | Q92902           | 2                    | 2              | 3                     | 700    | 79292 | 5.9  | Hermansky-Pudlak syndrome 1 protein                                                                                                                                                                                                                    |
| 3133 | Q5XKR6           | 2                    | 7              | 6.4                   | 373    | 41385 | 7.9  | AUP1 protein                                                                                                                                                                                                                                           |
| 3133 | UPI0000D611C1    | 2                    | 7              | 6.4                   | 375    | 41670 | 8.3  | Ancient ubiquitous protein 1 precursor.                                                                                                                                                                                                                |
| 3133 | Q68CX8           | 2                    | 7              | 6.4                   | 375    | 41587 | 8.3  | Hypothetical protein DKFZp686P12272                                                                                                                                                                                                                    |
| 3133 | Q9Y679-2         | 2                    | 7              | 5.9                   | 410    | 45787 | 8.6  | Isoform Short of Q9Y679                                                                                                                                                                                                                                |
| 3133 | UPI000013CFAF    | 2                    | 7              | 5.1                   | 474    | 52751 | 7.9  | Ancient ubiquitous protein 1 precursor.                                                                                                                                                                                                                |
| 3133 | Q9Y679           | 2                    | 7              | 5                     | 476    | 53028 | 8.1  | Ancient ubiquitous protein 1 precursor                                                                                                                                                                                                                 |
| 3134 | Q8WYI2           | 2                    | 2              | 10.9                  | 221    | 24997 | 5.4  | MSTP024                                                                                                                                                                                                                                                |
| 3134 | Q96CT6           | 2                    | 2              | 7.5                   | 322    | 36363 | 8.1  | C12orf10 protein                                                                                                                                                                                                                                       |
| 3134 | UPI000049DD6D    | 2                    | 2              | 7.4                   | 325    | 36629 | 7.6  | UPF0160 protein MYG1.                                                                                                                                                                                                                                  |
| 3134 | Q86UA3           | 2                    | 2              | 6.4                   | 376    | 42508 | 6.8  | Chromosome 12 open reading frame 10                                                                                                                                                                                                                    |

| No.  | Accession Number | Unique Peptide Count | Spectrum Count | Sequence Coverage (%) | Length | MolWt  | pI   | Descriptive Name                                                                                                                                                                |
|------|------------------|----------------------|----------------|-----------------------|--------|--------|------|---------------------------------------------------------------------------------------------------------------------------------------------------------------------------------|
| 3134 | UPI000013D729    | 2                    | 2              | 6.4                   | 376    | 42449  | 6.7  | UPF0160 protein MYG1.                                                                                                                                                           |
| 3134 | Q9HB07           | 2                    | 2              | 6.4                   | 376    | 42445  | 6.7  | UPF0160 protein MYG1                                                                                                                                                            |
| 3135 | Q96GC9           | 2                    | 11             | 6.4                   | 406    | 46238  | 6.9  | Transmembrane protein 49                                                                                                                                                        |
| 3136 | Q9NQ48           | 2                    | 2              | 6.4                   | 299    | 34592  | 5.4  | Leucine zipper transcription factor-like 1                                                                                                                                      |
| 3136 | UPI00004570F2    | 2                    | 2              | 6.4                   | 298    | 34461  | 5.4  | leucine zipper transcription factor-like 1                                                                                                                                      |
| 3136 | Q9NQ56           | 2                    | 2              | 6.4                   | 299    | 34591  | 5.4  | Leucine zipper transcription factor-like 1                                                                                                                                      |
| 3137 | Q8TCM0           | 2                    | 3              | 9.5                   | 262    | 28494  | 5.6  | Hypothetical protein DKFZp547L059                                                                                                                                               |
| 3137 | Q59HD3           | 2                    | 3              | 8.3                   | 303    | 33161  | 5.8  | Ataxin 2-binding protein 1 isoform 4 variant                                                                                                                                    |
| 3137 | UPI0000F54B2B    | 2                    | 3              | 6.8                   | 370    | 39783  | 6.7  | RNA binding motif protein 9 isoform 4                                                                                                                                           |
| 3137 | UPI000013F818    | 2                    | 3              | 6.8                   | 367    | 39515  | 6.7  | RNA binding motif protein 9 isoform 2                                                                                                                                           |
| 3137 | Q7Z7I7           | 2                    | 3              | 6.8                   | 370    | 40005  | 7.1  | Ataxin 2-binding protein variant 1                                                                                                                                              |
| 3137 | Q0VH35           | 2                    | 3              | 6.8                   | 370    | 39753  | 6.7  | RNA binding motif protein 9                                                                                                                                                     |
| 3137 | O43251-4         | 2                    | 3              | 6.8                   | 366    | 39386  | 6.7  | Isoform 4 of O43251                                                                                                                                                             |
| 3137 | O43251-5         | 2                    | 3              | 6.6                   | 376    | 39954  | 8.6  | Isoform 5 of O43251                                                                                                                                                             |
| 3137 | O43251-2         | 2                    | 3              | 6.6                   | 380    | 40351  | 8.6  | Isoform 2 of O43251                                                                                                                                                             |
| 3137 | UPI0000D62145    | 2                    | 3              | 6.4                   | 390    | 41453  | 7.7  | RNA-binding protein 9 (RNA-binding motif protein 9) (Hexaribonucleotide-binding protein 2) (Repressor of tamoxifen transcriptional activity).                                   |
| 3137 | UPI000045690E    | 2                    | 3              | 6.4                   | 388    | 41624  | 6.9  | Ataxin-2-binding protein 1.                                                                                                                                                     |
| 3137 | Q8TAE3           | 2                    | 3              | 6.4                   | 392    | 42084  | 7.7  | Hexaribonucleotide binding protein 1 isoform alpha                                                                                                                              |
| 3137 | O43251           | 2                    | 3              | 6.4                   | 390    | 41374  | 7.2  | RNA-binding protein 9                                                                                                                                                           |
| 3137 | A4F5G8           | 2                    | 3              | 6.3                   | 398    | 42920  | 6    | RNA binding motif protein 9                                                                                                                                                     |
| 3137 | UPI0000163C0C    | 2                    | 3              | 6.3                   | 397    | 42784  | 6.9  | ataxin 2-binding protein 1 isoform 4                                                                                                                                            |
| 3137 | Q9NWB1           | 2                    | 3              | 6.3                   | 397    | 42754  | 6.9  | Ataxin-2-binding protein 1                                                                                                                                                      |
| 3137 | Q8TAF2           | 2                    | 3              | 6.3                   | 395    | 42402  | 6.4  | Hexaribonucleotide binding protein 1 isoform beta                                                                                                                               |
| 3137 | Q8WYB2           | 2                    | 3              | 6                     | 418    | 44793  | 7.4  | Hexaribonucleotide binding protein 1 isoform gamma                                                                                                                              |
| 3137 | UPI0000D9C931    | 2                    | 3              | 5.6                   | 450    | 47206  | 6.6  | RNA binding motif protein 9 isoform 6                                                                                                                                           |
| 3137 | Q0PRL5           | 2                    | 3              | 5.5                   | 451    | 47334  | 6.6  | Hypothetical protein                                                                                                                                                            |
| 3138 | O75695           | 2                    | 3              | 6.3                   | 350    | 39641  | 5.1  | Protein XRP2                                                                                                                                                                    |
| 3138 | UPI0000139021    | 2                    | 3              | 6.3                   | 350    | 39642  | 5.1  | XRP2 protein                                                                                                                                                                    |
| 3139 | P07711           | 2                    | 6              | 6.3                   | 333    | 37564  | 5.4  | Cathepsin L precursor (EC 3.4.22.15) (Major excreted protein) (MEP) [Contains: Cathepsin L heavy chain; Cathepsin L light chain]                                                |
| 3140 | Q9H6A6           | 2                    | 2              | 7.2                   | 373    | 42030  | 5.9  | CDNA: FLJ22433 fis, clone HRC09172                                                                                                                                              |
| 3140 | Q19CC6           | 2                    | 2              | 6.3                   | 431    | 48410  | 5.6  | TTG1A                                                                                                                                                                           |
| 3140 | UPI0000D62063    | 2                    | 2              | 5.9                   | 456    | 51333  | 6    | Putative LAG1-interacting protein                                                                                                                                               |
| 3140 | Q5SWX8           | 2                    | 2              | 5.9                   | 454    | 51103  | 5.9  | Uncharacterized protein C1orf27                                                                                                                                                 |
| 3141 | O60256           | 2                    | 2              | 6.2                   | 369    | 40926  | 7.4  | Phosphoribosyl pyrophosphate synthetase-associated protein 2                                                                                                                    |
| 3141 | UPI0000F51D5E    | 2                    | 2              | 6.1                   | 379    | 42102  | 7.4  | PHOSPHORIBOSYL PYROPHOSPHATE SYNTHETASE-ASSOC                                                                                                                                   |
| 3142 | P35269           | 2                    | 3              | 6.2                   | 517    | 58241  | 7.5  | Transcription initiation factor IIF subunit alpha                                                                                                                               |
| 3142 | UPI00001367FB    | 2                    | 3              | 6.2                   | 517    | 58275  | 7.5  | general transcription factor IIF, polypeptide 1, 74kDa                                                                                                                          |
| 3142 | Q6IBK5           | 2                    | 3              | 6.2                   | 517    | 58226  | 7.5  | GTF2F1 protein                                                                                                                                                                  |
| 3143 | Q13449           | 2                    | 2              | 6.2                   | 338    | 37394  | 7    | Limbic system-associated membrane protein precursor                                                                                                                             |
| 3144 | UPI000006F931    | 2                    | 2              | 8.3                   | 217    | 23468  | 5.2  | B-cell CLL/lymphoma 7C                                                                                                                                                          |
| 3144 | Q8WUZ0           | 2                    | 2              | 8.3                   | 217    | 23365  | 5.3  | B-cell CLL/lymphoma 7 protein family member C                                                                                                                                   |
| 3144 | UPI00001D6EEE    | 2                    | 2              | 7.4                   | 242    | 26422  | 10.7 | B-cell CLL/lymphoma 7 protein family member C.                                                                                                                                  |
| 3144 | Q8WUZ0-2         | 2                    | 2              | 7.4                   | 242    | 26391  | 10.7 | Isoform 2 of Q8WUZ0                                                                                                                                                             |
| 3144 | Q6PJY5           | 2                    | 2              | 6.2                   | 292    | 32726  | 6.5  | Hypothetical protein                                                                                                                                                            |
| 3145 | Q86U42-2         | 2                    | 4              | 6.4                   | 296    | 31497  | 5    | Isoform 2 of Q86U42                                                                                                                                                             |
| 3145 | Q86U42           | 2                    | 4              | 6.2                   | 306    | 32749  | 5.1  | Polyadenylate-binding protein 2 (Poly(A)-binding protein 2) (Poly(A)- binding protein II) (PABII) (Polyadenylate-binding nuclear protein 1) (Nuclear poly(A)-binding protein 1) |
| 3146 | Q96G21           | 2                    | 5              | 6.2                   | 291    | 33757  | 9.5  | U3 small nucleolar ribonucleoprotein protein IMP4                                                                                                                               |
| 3147 | UPI00000473F8    | 2                    | 2              | 6.2                   | 321    | 34006  | 6.1  | hypothetical protein LOC283871                                                                                                                                                  |
| 3148 | UPI0000DD7A4B    | 2                    | 15             | 6.2                   | 1038   | 117390 | 6    | PREDICTED: similar to Prostate, ovary, testis expressed protein on chromosome 2                                                                                                 |
| 3149 | Q14254           | 2                    | 2              | 6.1                   | 379    | 41685  | 5.3  | Flotillin-2                                                                                                                                                                     |
| 3149 | Q9BTI6           | 2                    | 2              | 6                     | 385    | 42566  | 5.3  | FLOT2 protein                                                                                                                                                                   |
| 3149 | UPI00001AE777    | 2                    | 2              | 5.4                   | 428    | 47064  | 5.3  | flotillin 2                                                                                                                                                                     |
| 3150 | Q9BXW7-2         | 2                    | 2              | 6.6                   | 393    | 43588  | 6.9  | Isoform 1 of Q9BXW7                                                                                                                                                             |
| 3150 | Q9BXW7           | 2                    | 2              | 6.1                   | 423    | 46321  | 8.1  | Cat eye syndrome critical region protein 5 precursor                                                                                                                            |
| 3151 | UPI00004561E0    | 2                    | 3              | 7.4                   | 353    | 40347  | 9    | 39S ribosomal protein L37, mitochondrial precursor (L37mt) (MRP-L37).                                                                                                           |
| 3151 | UPI0000D61F21    | 2                    | 3              | 6.2                   | 416    | 47647  | 7.7  | 39S ribosomal protein L37, mitochondrial precursor (L37mt) (MRP-L37).                                                                                                           |
| 3151 | Q9BZE1           | 2                    | 3              | 6.1                   | 423    | 48101  | 8.6  | 39S ribosomal protein L37, mitochondrial precursor                                                                                                                              |
| 3151 | UPI000006CF76    | 2                    | 3              | 6.1                   | 423    | 48118  | 8.6  | mitochondrial ribosomal protein L37                                                                                                                                             |
| 3152 | Q9H6F5           | 2                    | 3              | 6.1                   | 360    | 40236  | 10.3 | Coiled-coil domain-containing protein 86                                                                                                                                        |
| 3153 | Q53F51           | 2                    | 2              | 6.2                   | 357    | 41238  | 6.9  | FGF intracellular binding protein isoform b variant                                                                                                                             |
| 3153 | O46431           | 2                    | 2              | 6.2                   | 357    | 41210  | 6.8  | Acidic fibroblast growth factor intracellular-binding protein                                                                                                                   |
| 3153 | O43427           | 2                    | 2              | 6                     | 364    | 41878  | 6.5  | Acidic fibroblast growth factor intracellular-binding protein                                                                                                                   |
| 3154 | UPI0000456D2D    | 2                    | 14             | 7.1                   | 340    | 37965  | 9.5  | leukocyte receptor cluster (LRC) member 4 protein                                                                                                                               |

| No.  | Accession Number | Unique Peptide Count | Spectrum Count | Sequence Coverage (%) | Length | MolWt  | pI   | Descriptive Name                                                                                                                                                       |
|------|------------------|----------------------|----------------|-----------------------|--------|--------|------|------------------------------------------------------------------------------------------------------------------------------------------------------------------------|
| 3154 | Q99908           | 2                    | 14             | 7                     | 342    | 38164  | 9.5  | BB1 protein                                                                                                                                                            |
| 3154 | Q05DF0           | 2                    | 14             | 6                     | 399    | 44733  | 8.9  | LENG4 protein                                                                                                                                                          |
| 3154 | Q9BVP2           | 2                    | 14             | 5.1                   | 472    | 52765  | 9    | Leukocyte receptor cluster (LRC) member 4                                                                                                                              |
| 3154 | Q96N66           | 2                    | 14             | 5.1                   | 472    | 52775  | 9    | Leukocyte receptor cluster member 4                                                                                                                                    |
| 3154 | Q7L5N2           | 2                    | 14             | 5.1                   | 471    | 52634  | 9    | LENG4 protein                                                                                                                                                          |
| 3155 | Q15036           | 2                    | 2              | 6                     | 470    | 52901  | 7.5  | Sorting nexin-17                                                                                                                                                       |
| 3156 | UPI00001D6A08    | 2                    | 5              | 6.8                   | 338    | 38012  | 8.5  | 3-hydroxyisobutyryl-Coenzyme A hydrolase isoform 2                                                                                                                     |
| 3156 | Q9BS94           | 2                    | 5              | 6.4                   | 362    | 40418  | 8.6  | HIBCH protein                                                                                                                                                          |
| 3156 | Q53GA8           | 2                    | 5              | 6                     | 385    | 43321  | 8.2  | 3-hydroxyisobutyryl-Coenzyme A hydrolase isoform 1 variant                                                                                                             |
| 3156 | UPI000013F16E    | 2                    | 5              | 6                     | 386    | 43482  | 8.2  | 3-hydroxyisobutyryl-Coenzyme A hydrolase isoform 1                                                                                                                     |
| 3156 | Q6NVY1           | 2                    | 5              | 6                     | 386    | 43410  | 8.4  | 3-hydroxyisobutyryl-CoA hydrolase                                                                                                                                      |
| 3156 | Q53GF2           | 2                    | 5              | 6                     | 385    | 43348  | 8.6  | 3-hydroxyisobutyryl-Coenzyme A hydrolase isoform 1 variant                                                                                                             |
| 3157 | Q8IXS6           | 2                    | 3              | 6.9                   | 379    | 42185  | 5.1  | Paralemmin-2                                                                                                                                                           |
| 3157 | Q8IXS6-2         | 2                    | 3              | 6.3                   | 411    | 45438  | 5.1  | Isoform 2 of Q8IXS6                                                                                                                                                    |
| 3157 | Q5T719           | 2                    | 3              | 6                     | 433    | 47627  | 4.9  | Paralemmin-2 (A kinase (PRKA) anchor protein 2)                                                                                                                        |
| 3158 | Q6ZNR2           | 2                    | 8              | 6                     | 316    | 35381  | 11.1 | CDNA FLJ27308 fis, clone TMS06173                                                                                                                                      |
| 3158 | UPI0000D6217D    | 2                    | 8              | 6                     | 319    | 36177  | 10.3 | transmembrane protein 153 (TMEM153), mRNA                                                                                                                              |
| 3158 | Q96C62           | 2                    | 8              | 2.8                   | 682    | 76915  | 10   | Transmembrane protein 112B                                                                                                                                             |
| 3158 | Q9BU23           | 2                    | 8              | 2.7                   | 707    | 79698  | 10.1 | Transmembrane protein 153                                                                                                                                              |
| 3159 | Q8TDR2           | 2                    | 3              | 6                     | 401    | 44573  | 9    | Serine/threonine-protein kinase 35                                                                                                                                     |
| 3160 | Q95251           | 2                    | 2              | 5.9                   | 611    | 70642  | 8.8  | Histone acetyltransferase MYST2                                                                                                                                        |
| 3161 | P35659           | 2                    | 5              | 5.9                   | 375    | 42674  | 8.6  | Protein DEK                                                                                                                                                            |
| 3162 | P55347-2         | 2                    | 2              | 5.9                   | 405    | 44629  | 6.7  | Isoform 2 of P55347                                                                                                                                                    |
| 3163 | Q15738           | 2                    | 2              | 5.9                   | 373    | 41900  | 8.1  | Sterol-4-alpha-carboxylate 3-dehydrogenase, decarboxylating                                                                                                            |
| 3164 | Q17RS0           | 2                    | 2              | 5.9                   | 1105   | 122867 | 5.8  | SWI/SNF related, matrix associated, actin dependent regulator of chromatin, subfamily c, member 1                                                                      |
| 3164 | UPI0000167B18    | 2                    | 2              | 5.9                   | 1105   | 122721 | 5.8  | SWI/SNF-related matrix-associated actin-dependent regulator of chromatin c1                                                                                            |
| 3164 | Q58EY4           | 2                    | 2              | 5.9                   | 1105   | 122911 | 5.7  | SWI/SNF related, matrix associated, actin dependent regulator of chromatin, subfamily c, member 1                                                                      |
| 3165 | Q6NSW5           | 2                    | 2              | 5.9                   | 357    | 40514  | 6.5  | Protein FAM45B                                                                                                                                                         |
| 3166 | Q969N2-2         | 2                    | 2              | 8.9                   | 384    | 43616  | 6.9  | Isoform 2 of Q969N2                                                                                                                                                    |
| 3166 | Q969N2-4         | 2                    | 2              | 7.1                   | 476    | 54118  | 8.2  | Isoform 4 of Q969N2                                                                                                                                                    |
| 3166 | Q969N2           | 2                    | 2              | 5.9                   | 578    | 65700  | 8.4  | GPI transamidase component PIG-T precursor                                                                                                                             |
| 3167 | Q9H832-2         | 2                    | 3              | 8.5                   | 246    | 28075  | 6.1  | Isoform 2 of Q9H832                                                                                                                                                    |
| 3167 | UPI0000DBEF08    | 2                    | 3              | 6.1                   | 347    | 38506  | 9.4  | ubiquitin-conjugating enzyme E2Z (putative)                                                                                                                            |
| 3167 | Q9H832           | 2                    | 3              | 5.9                   | 354    | 38210  | 5.6  | Ubiquitin-conjugating enzyme E2 Z                                                                                                                                      |
| 3168 | Q9Y4G6           | 2                    | 2              | 5.9                   | 2542   | 271553 | 5.6  | Talin-2                                                                                                                                                                |
| 3168 | UPI0000D6134E    | 2                    | 2              | 5.9                   | 2544   | 271795 | 5.6  | Talin-2.                                                                                                                                                               |
| 3168 | UPI00001FE5FC    | 2                    | 2              | 5.9                   | 2542   | 271611 | 5.6  | Talin-2.                                                                                                                                                               |
| 3169 | P43897           | 2                    | 4              | 5.8                   | 325    | 35391  | 8.4  | Elongation factor Ts, mitochondrial precursor                                                                                                                          |
| 3169 | Q561V7           | 2                    | 4              | 5.8                   | 325    | 35378  | 8.4  | TSMF protein                                                                                                                                                           |
| 3169 | P43897-2         | 2                    | 4              | 5.5                   | 346    | 37656  | 7.7  | Isoform 2 of P43897                                                                                                                                                    |
| 3170 | Q9BYB4-2         | 2                    | 2              | 9                     | 212    | 22896  | 7.2  | Isoform 2 of Q9BYB4                                                                                                                                                    |
| 3170 | Q9BYB4           | 2                    | 2              | 5.8                   | 327    | 35618  | 8    | Guanine nucleotide-binding protein subunit beta-like protein 1                                                                                                         |
| 3171 | Q75787           | 2                    | 9              | 5.7                   | 350    | 39008  | 6.1  | Renin receptor precursor (Renin/prorenin receptor) (ATPase H(+)-transporting lysosomal accessory protein 2) (ATPase H(+)-transporting lysosomal-interacting protein 2) |
| 3172 | Q13641           | 2                    | 7              | 5.7                   | 420    | 46032  | 6.8  | Trophoblast glycoprotein precursor                                                                                                                                     |
| 3173 | Q15035           | 2                    | 4              | 5.7                   | 370    | 43328  | 9.2  | Translocation-associated membrane protein 2                                                                                                                            |
| 3174 | Q5QP19           | 2                    | 2              | 6.5                   | 397    | 44017  | 7.1  | NFS1 nitrogen fixation 1                                                                                                                                               |
| 3174 | Q53FP3           | 2                    | 2              | 5.7                   | 457    | 50186  | 8.3  | NFS1 nitrogen fixation 1 isoform a variant                                                                                                                             |
| 3174 | Q9Y697           | 2                    | 2              | 5.7                   | 457    | 50196  | 8.3  | Cysteine desulfurase, mitochondrial precursor                                                                                                                          |
| 3175 | Q9H0W9           | 2                    | 2              | 5.7                   | 315    | 35117  | 6.7  | Ester hydrolase C11orf54                                                                                                                                               |
| 3176 | UPI0000D61B7E    | 2                    | 4              | 5.7                   | 420    | 48535  | 7.2  | Prostatic acid phosphatase precursor (EC 3.1.3.2).                                                                                                                     |
| 3177 | Q95905           | 2                    | 7              | 5.6                   | 644    | 72758  | 4.9  | SGT1 protein                                                                                                                                                           |
| 3177 | Q6I9U8           | 2                    | 7              | 5.6                   | 644    | 72710  | 4.9  | HSGT1 protein                                                                                                                                                          |
| 3178 | P57081           | 2                    | 2              | 5.6                   | 412    | 45490  | 7.1  | WD repeat protein 4                                                                                                                                                    |
| 3179 | Q6PKB3           | 2                    | 2              | 10.4                  | 222    | 25023  | 5    | MRPS27 protein                                                                                                                                                         |
| 3179 | Q6P1S1           | 2                    | 2              | 5.6                   | 414    | 47611  | 6.2  | Mitochondrial ribosomal protein S27                                                                                                                                    |
| 3180 | Q9H173           | 2                    | 3              | 5.6                   | 461    | 52085  | 5.4  | Nucleotide exchange factor SIL1 precursor                                                                                                                              |
| 3181 | O43464-2         | 2                    | 2              | 6.9                   | 361    | 38493  | 10.7 | Isoform 2 of O43464                                                                                                                                                    |
| 3181 | O43464-4         | 2                    | 2              | 6.6                   | 377    | 39914  | 10.6 | Isoform 4 of O43464                                                                                                                                                    |
| 3181 | O43464-3         | 2                    | 2              | 5.7                   | 436    | 46382  | 10.2 | Isoform 3 of O43464                                                                                                                                                    |
| 3181 | O43464           | 2                    | 2              | 5.5                   | 458    | 48841  | 10.1 | Serine protease HTRA2, mitochondrial precursor                                                                                                                         |
| 3182 | O95684-2         | 2                    | 2              | 5.8                   | 379    | 40907  | 4.6  | Isoform 2 of O95684                                                                                                                                                    |
| 3182 | O95684           | 2                    | 2              | 5.5                   | 399    | 43065  | 4.8  | FGFR1 oncogene partner                                                                                                                                                 |
| 3183 | Q13454           | 2                    | 8              | 5.5                   | 348    | 39676  | 9.9  | Tumor suppressor candidate 3                                                                                                                                           |
| 3183 | Q13454-2         | 2                    | 8              | 5.5                   | 347    | 39558  | 10.1 | Isoform 2 of Q13454                                                                                                                                                    |

| No.  | Accession Number | Unique Peptide Count | Spectrum Count | Sequence Coverage (%) | Length | MolWt  | pI   | Descriptive Name                                                                                                                                                   |
|------|------------------|----------------------|----------------|-----------------------|--------|--------|------|--------------------------------------------------------------------------------------------------------------------------------------------------------------------|
| 3184 | Q6NVV6           | 2                    | 2              | 7.9                   | 151    | 16479  | 9.4  | Similar to hepatitis C virus core-binding protein 6; cervical cancer oncogene 3                                                                                    |
| 3184 | UPI00001615C6    | 2                    | 2              | 6.3                   | 189    | 20678  | 9.7  | UPI00001615C6 UniRef100 entry                                                                                                                                      |
| 3184 | Q9BWH2           | 2                    | 2              | 6.3                   | 189    | 20676  | 9.7  | FUN14 domain-containing protein 2                                                                                                                                  |
| 3184 | Q5HYP8           | 2                    | 2              | 5.5                   | 218    | 23339  | 10.4 | FUN14 domain containing 2                                                                                                                                          |
| 3185 | Q92917           | 2                    | 2              | 5.5                   | 476    | 52229  | 6.2  | G patch domain and KOW motifs-containing protein                                                                                                                   |
| 3185 | UPI000059DB1D    | 2                    | 2              | 5.5                   | 475    | 52115  | 6.3  | G patch domain and KOW motifs-containing protein (Protein T54).                                                                                                    |
| 3186 | Q8WV24           | 2                    | 3              | 6.6                   | 259    | 29524  | 9.2  | Pleckstrin homology-like domain family A member 1                                                                                                                  |
| 3186 | A2BDE7           | 2                    | 3              | 5.4                   | 312    | 34897  | 9.3  | PHLDA1 protein                                                                                                                                                     |
| 3186 | UPI000013D704    | 2                    | 3              | 4.2                   | 401    | 45016  | 9.9  | pleckstrin homology-like domain, family A, member 1                                                                                                                |
| 3187 | UPI0000D612CF    | 2                    | 2              | 9.1                   | 309    | 34862  | 6.3  | Autophagy-related protein 16-1 (APG16-like 1).                                                                                                                     |
| 3187 | Q676U5-3         | 2                    | 2              | 6                     | 470    | 53220  | 5.9  | Isoform 3 of Q676U5                                                                                                                                                |
| 3187 | Q53SV2           | 2                    | 2              | 5.4                   | 523    | 58272  | 6.3  | Hypothetical protein FLJ10035                                                                                                                                      |
| 3187 | Q676U5           | 2                    | 2              | 4.6                   | 607    | 68265  | 6.6  | Autophagy-related protein 16-1                                                                                                                                     |
| 3188 | UPI0000D60EDC    | 2                    | 2              | 6.4                   | 342    | 36977  | 5.1  | Uncharacterized protein C18orf25.                                                                                                                                  |
| 3188 | Q96B23-2         | 2                    | 2              | 6.4                   | 343    | 37048  | 5.1  | Isoform 2 of Q96B23                                                                                                                                                |
| 3188 | UPI000013DCB6    | 2                    | 2              | 5.5                   | 403    | 43324  | 4.9  | Uncharacterized protein C18orf25.                                                                                                                                  |
| 3188 | Q96B23           | 2                    | 2              | 5.4                   | 404    | 43395  | 4.9  | Uncharacterized protein C18orf25                                                                                                                                   |
| 3189 | Q9UKM7           | 2                    | 3              | 5.4                   | 699    | 79580  | 7.7  | Endoplasmic reticulum mannosyl-oligosaccharide 1,2-alpha-mannosidase                                                                                               |
| 3189 | UPI0000036A6B    | 2                    | 3              | 5.4                   | 699    | 79553  | 7.7  | alpha 1,2-mannosidase                                                                                                                                              |
| 3190 | UPI00004577B7    | 2                    | 2              | 5.4                   | 404    | 44731  | 6    | SH3 domain GRB2-like protein B2 (Endophilin-B2).                                                                                                                   |
| 3191 | O95359-2         | 2                    | 2              | 5.3                   | 571    | 64156  | 5.3  | Isoform 2 of O95359                                                                                                                                                |
| 3191 | Q4VXL4           | 2                    | 2              | 5.2                   | 575    | 64676  | 5.3  | Transforming, acidic coiled-coil containing protein 2                                                                                                              |
| 3191 | Q4VXL5           | 2                    | 2              | 3.6                   | 832    | 91585  | 5.5  | Transforming, acidic coiled-coil containing protein 2                                                                                                              |
| 3191 | UPI000002B4B3    | 2                    | 2              | 3.2                   | 949    | 103741 | 5    | Transforming acidic coiled-coil-containing protein 2 (Anti Zuai-1) (AZU-1).                                                                                        |
| 3192 | Q9UHS8           | 2                    | 2              | 6.1                   | 393    | 44147  | 9    | PRO1975                                                                                                                                                            |
| 3192 | Q53HW7           | 2                    | 2              | 5.3                   | 450    | 49950  | 9    | Sulfide dehydrogenase like                                                                                                                                         |
| 3193 | Q6YP21           | 2                    | 2              | 5.3                   | 454    | 51400  | 8.2  | Kynurenine aminotransferase III                                                                                                                                    |
| 3194 | Q9NXG7           | 2                    | 27             | 5.3                   | 525    | 55145  | 4.9  | CDNA FLJ20261 fis, clone COLF7630                                                                                                                                  |
| 3195 | Q5TD05           | 2                    | 2              | 8.6                   | 139    | 15645  | 5.3  | NAD(P)H dehydrogenase, quinone 2                                                                                                                                   |
| 3195 | Q59EN2           | 2                    | 2              | 7.5                   | 160    | 17996  | 8    | NAD(P)H dehydrogenase, quinone 2 variant                                                                                                                           |
| 3195 | Q5TD07           | 2                    | 2              | 6.2                   | 193    | 21537  | 6.5  | NAD(P)H dehydrogenase, quinone 2                                                                                                                                   |
| 3195 | P16083           | 2                    | 2              | 5.2                   | 231    | 25953  | 6.3  | Ribosylidihyronicotinamide dehydrogenase [quinone]                                                                                                                 |
| 3195 | Q5TD04           | 2                    | 2              | 5.2                   | 231    | 25919  | 6.3  | NAD(P)H dehydrogenase, quinone 2                                                                                                                                   |
| 3196 | Q16850           | 2                    | 6              | 5.2                   | 503    | 56806  | 8.5  | Cytochrome P450 51A1                                                                                                                                               |
| 3197 | Q05B11           | 2                    | 2              | 5.6                   | 392    | 41979  | 9.1  | Hypothetical protein                                                                                                                                               |
| 3197 | A0JLT1           | 2                    | 2              | 5.1                   | 429    | 46024  | 8.8  | Hypothetical protein                                                                                                                                               |
| 3197 | O15446-2         | 2                    | 2              | 4.3                   | 512    | 55172  | 8.4  | Isoform 2 of O15446                                                                                                                                                |
| 3197 | O15446           | 2                    | 2              | 4.3                   | 510    | 54986  | 8.5  | RNA polymerase I-associated factor PAF49                                                                                                                           |
| 3198 | Q5SY40           | 2                    | 2              | 6.5                   | 460    | 51013  | 8.9  | Ligatin                                                                                                                                                            |
| 3198 | P41214-2         | 2                    | 2              | 6.5                   | 460    | 51040  | 8.9  | Isoform 2 of P41214                                                                                                                                                |
| 3198 | P41214           | 2                    | 2              | 5.1                   | 584    | 64734  | 7.6  | Ligatin                                                                                                                                                            |
| 3198 | Q96DG3           | 2                    | 2              | 5.1                   | 584    | 64707  | 7.6  | Ligatin                                                                                                                                                            |
| 3199 | P48651           | 2                    | 19             | 5.1                   | 473    | 55528  | 8.4  | Phosphatidylserine synthase 1                                                                                                                                      |
| 3200 | P49810           | 2                    | 2              | 5.1                   | 448    | 50140  | 4.6  | Presenilin-2 (EC 3.4.23.-) (PS-2) (STM-2) (E5-1) (AD3LP) (AD5) [Contains: Presenilin-2 NTF subunit; Presenilin-2 CTF subunit]                                      |
| 3200 | UPI00001616FE    | 2                    | 2              | 5.1                   | 447    | 50015  | 4.6  | presenilin 2 isoform 2                                                                                                                                             |
| 3200 | UPI000003F060    | 2                    | 2              | 5.1                   | 448    | 50144  | 4.6  | presenilin 2 isoform 1                                                                                                                                             |
| 3201 | Q12972           | 2                    | 2              | 5.1                   | 351    | 38479  | 7.4  | Nuclear inhibitor of protein phosphatase 1 (NIPP-1) (Protein phosphatase 1 regulatory inhibitor subunit 8) [Includes: Activator of RNA decay (EC 3.1.4.-) (ARD-1)] |
| 3201 | Q561W4           | 2                    | 2              | 5.1                   | 351    | 38478  | 7.4  | Protein phosphatase 1, regulatory (Inhibitor) subunit 8                                                                                                            |
| 3202 | Q16566           | 2                    | 2              | 5.1                   | 473    | 51926  | 5.8  | Calcium/calmodulin-dependent protein kinase type IV                                                                                                                |
| 3203 | Q8NBJ4-2         | 2                    | 2              | 5.4                   | 391    | 44273  | 4.9  | Isoform 2 of Q8NBJ4                                                                                                                                                |
| 3203 | Q8NBJ4           | 2                    | 2              | 5.2                   | 401    | 45333  | 5    | Golgi phosphoprotein 2                                                                                                                                             |
| 3203 | Q5VZE3           | 2                    | 2              | 5.1                   | 410    | 46273  | 5    | Golgi phosphoprotein 2                                                                                                                                             |
| 3204 | UPI0000D6136D    | 2                    | 6              | 5.5                   | 492    | 52720  | 5.5  | CD276 antigen precursor (Costimulatory molecule) (B7 homolog 3) (B7- H3) (4Ig-B7-H3).                                                                              |
| 3204 | Q5ZPR3-3         | 2                    | 6              | 5.5                   | 493    | 52762  | 5.5  | Isoform 3 of Q5ZPR3                                                                                                                                                |
| 3204 | Q5ZPR3           | 2                    | 6              | 5.1                   | 534    | 57235  | 4.9  | CD276 antigen precursor                                                                                                                                            |
| 3204 | Q5ZPR3-4         | 2                    | 6              | 5.1                   | 533    | 57165  | 5    | Isoform 4 of Q5ZPR3                                                                                                                                                |
| 3205 | Q9P2K3-2         | 2                    | 2              | 5.7                   | 436    | 47760  | 6.7  | Isoform 2 of Q9P2K3                                                                                                                                                |
| 3205 | Q9P2K3           | 2                    | 2              | 5.1                   | 495    | 55581  | 8.3  | REST corepressor 3                                                                                                                                                 |
| 3206 | Q9Y302-2         | 2                    | 3              | 6.9                   | 335    | 38484  | 9.4  | Isoform 2 of Q9Y302                                                                                                                                                |
| 3206 | UPI0000D4C36B    | 2                    | 3              | 6.1                   | 379    | 43772  | 9.4  | PREDICTED: similar to G protein-coupled receptor 89                                                                                                                |
| 3206 | Q9Y302           | 2                    | 3              | 5.1                   | 455    | 52917  | 9.3  | Protein GPR89A                                                                                                                                                     |
| 3206 | UPI0000D61FC4    | 2                    | 3              | 5                     | 458    | 53279  | 9.3  | Protein GPR89A (Putative MAPK-activating protein PM01) (Putative NF- kappa-B-activating protein 90).                                                               |
| 3207 | Q14194           | 2                    | 3              | 5.9                   | 572    | 62184  | 7    | Dihydropyrimidinase-related protein 1                                                                                                                              |

| No.  | Accession Number | Unique Peptide Count | Spectrum Count | Sequence Coverage (%) | Length | MolWt | pI  | Descriptive Name                                                                                                                                                                                                                                                                                                                                                                                                                                                                                                     |
|------|------------------|----------------------|----------------|-----------------------|--------|-------|-----|----------------------------------------------------------------------------------------------------------------------------------------------------------------------------------------------------------------------------------------------------------------------------------------------------------------------------------------------------------------------------------------------------------------------------------------------------------------------------------------------------------------------|
| 3207 | A0EJG6           | 2                    | 3              | 5                     | 686    | 74262 | 6.9 | Long form collapsin response mediator protein 1                                                                                                                                                                                                                                                                                                                                                                                                                                                                      |
| 3208 | A0PJ71           | 2                    | 3              | 5                     | 478    | 53226 | 9.1 | Hypothetical protein                                                                                                                                                                                                                                                                                                                                                                                                                                                                                                 |
| 3208 | O60934           | 2                    | 3              | 3.2                   | 754    | 84959 | 6.9 | Nibrin                                                                                                                                                                                                                                                                                                                                                                                                                                                                                                               |
| 3209 | P29083           | 2                    | 3              | 5                     | 439    | 49452 | 4.8 | Transcription initiation factor IIE subunit alpha                                                                                                                                                                                                                                                                                                                                                                                                                                                                    |
| 3209 | UPI00001367F2    | 2                    | 3              | 5                     | 439    | 49480 | 4.8 | general transcription factor IIE, polypeptide 1 (alpha subunit, 56kD)                                                                                                                                                                                                                                                                                                                                                                                                                                                |
| 3210 | UPI00001AED12    | 2                    | 2              | 5.4                   | 355    | 38659 | 5.2 | vacuolar protein sorting 37C                                                                                                                                                                                                                                                                                                                                                                                                                                                                                         |
| 3210 | Q8N3K4           | 2                    | 2              | 5                     | 377    | 41650 | 7.3 | Vacuolar protein sorting-associated protein 37 homolog C                                                                                                                                                                                                                                                                                                                                                                                                                                                             |
| 3211 | Q9NSG8           | 2                    | 2              | 9.3                   | 258    | 30204 | 9.2 | Hypothetical protein DKFZp761G1923                                                                                                                                                                                                                                                                                                                                                                                                                                                                                   |
| 3211 | Q9BTU6           | 2                    | 2              | 5                     | 479    | 54022 | 8.3 | Phosphatidylinositol 4-kinase type II                                                                                                                                                                                                                                                                                                                                                                                                                                                                                |
| 3212 | Q9NV88           | 2                    | 3              | 5                     | 658    | 73815 | 6.3 | Integrator complex subunit 9                                                                                                                                                                                                                                                                                                                                                                                                                                                                                         |
| 3212 | UPI0000070FF9    | 2                    | 3              | 5                     | 658    | 73786 | 6.3 | integrator complex subunit 9                                                                                                                                                                                                                                                                                                                                                                                                                                                                                         |
| 3213 | Q5T7V6           | 2                    | 2              | 4.9                   | 350    | 39927 | 6.8 | Protein prenyltransferase alpha subunit repeat containing 1                                                                                                                                                                                                                                                                                                                                                                                                                                                          |
| 3214 | Q5TDF7           | 2                    | 3              | 4.9                   | 384    | 43089 | 8.2 | NOL1/NOP2/Sun domain family, member 4                                                                                                                                                                                                                                                                                                                                                                                                                                                                                |
| 3214 | Q96CB9           | 2                    | 3              | 4.9                   | 384    | 43059 | 8.2 | NOL1/NOP2/Sun domain family, member 4                                                                                                                                                                                                                                                                                                                                                                                                                                                                                |
| 3215 | Q68D27           | 2                    | 2              | 4.9                   | 575    | 63967 | 6.9 | Hypothetical protein DKFZp686B20267                                                                                                                                                                                                                                                                                                                                                                                                                                                                                  |
| 3215 | Q96RQ3           | 2                    | 2              | 3.9                   | 725    | 80473 | 7.8 | Methylcrotonoyl-CoA carboxylase subunit alpha, mitochondrial precursor                                                                                                                                                                                                                                                                                                                                                                                                                                               |
| 3216 | Q8IVX4           | 2                    | 2              | 4.9                   | 509    | 57063 | 5.6 | T-complex 11-like protein 1                                                                                                                                                                                                                                                                                                                                                                                                                                                                                          |
| 3216 | Q9NUJ3           | 2                    | 2              | 4.9                   | 509    | 57035 | 5.6 | CDNA FLJ11336 fis, clone PLACE1010661, weakly similar to TESTIS-SPECIFIC PROTEIN PBS13                                                                                                                                                                                                                                                                                                                                                                                                                               |
| 3217 | UPI000045631B    | 2                    | 2              | 5.2                   | 404    | 43603 | 8.5 | Egl nine homolog 1 (EC 1.14.11.-) (Hypoxia-inducible factor prolyl hydroxylase 2) (HIF-prolyl hydroxylase 2) (HIF-PH2) (HPH-2) (Prolyl hydroxylase domain-containing protein 2) (PHD2) (SM-20).                                                                                                                                                                                                                                                                                                                      |
| 3217 | Q9GZT9-2         | 2                    | 2              | 5.2                   | 404    | 43666 | 8.5 | Isoform 2 of Q9GZT9                                                                                                                                                                                                                                                                                                                                                                                                                                                                                                  |
| 3217 | Q9GZT9           | 2                    | 2              | 4.9                   | 426    | 46021 | 8.5 | Egl nine homolog 1                                                                                                                                                                                                                                                                                                                                                                                                                                                                                                   |
| 3218 | Q9NRX5           | 2                    | 3              | 4.9                   | 453    | 50495 | 5.8 | Serine incorporator 1                                                                                                                                                                                                                                                                                                                                                                                                                                                                                                |
| 3219 | Q9NWX8           | 2                    | 3              | 4.9                   | 432    | 46981 | 4.6 | Phosphoprotein associated with glycosphingolipid-enriched microdomains 1                                                                                                                                                                                                                                                                                                                                                                                                                                             |
| 3220 | P04049           | 2                    | 2              | 4.8                   | 648    | 73052 | 9.2 | RAF proto-oncogene serine/threonine-protein kinase                                                                                                                                                                                                                                                                                                                                                                                                                                                                   |
| 3221 | P15291           | 2                    | 3              | 4.8                   | 398    | 43920 | 8.6 | Beta-1,4-galactosyltransferase 1 (EC 2.4.1.-) (Beta-1,4-GalTase 1) (Beta4Gal-T1) (b4Gal-T1) (UDP-galactose:beta-N-acetylglucosamine beta-1,4-galactosyltransferase 1) (UDP-Gal:beta-GlcNAc beta-1,4-galactosyltransferase 1) [Includes: Lactose synthase A protein (EC 2.4.1.22); N-acetyllactosamine synthase (EC 2.4.1.90) (Nal synthetase); Beta-N-acetylglucosaminylglycopeptide beta-1,4-galactosyltransferase (EC 2.4.1.38); Beta-N-acetylglucosaminyl-glycolipid beta-1,4-galactosyltransferase (EC 2.4.1.-)] |
| 3222 | P30837           | 2                    | 4              | 4.8                   | 517    | 57238 | 6.8 | Aldehyde dehydrogenase X, mitochondrial precursor                                                                                                                                                                                                                                                                                                                                                                                                                                                                    |
| 3223 | Q9BPW0           | 2                    | 5              | 5                     | 484    | 55096 | 6.2 | PPP5C protein                                                                                                                                                                                                                                                                                                                                                                                                                                                                                                        |
| 3223 | P53041           | 2                    | 5              | 4.8                   | 499    | 56879 | 6.3 | Serine/threonine-protein phosphatase 5                                                                                                                                                                                                                                                                                                                                                                                                                                                                               |
| 3223 | Q53FR0           | 2                    | 5              | 4.8                   | 499    | 56907 | 6.3 | Protein phosphatase 5, catalytic subunit variant                                                                                                                                                                                                                                                                                                                                                                                                                                                                     |
| 3224 | Q15629           | 2                    | 18             | 4.8                   | 374    | 43072 | 9.6 | Translocation-associated membrane protein 1                                                                                                                                                                                                                                                                                                                                                                                                                                                                          |
| 3225 | UPI000013E464    | 2                    | 2              | 6.7                   | 596    | 65586 | 6   | family with sequence similarity 91, member A1 (FAM91A1), mRNA                                                                                                                                                                                                                                                                                                                                                                                                                                                        |
| 3225 | Q658Y4           | 2                    | 2              | 4.8                   | 838    | 93969 | 6.4 | Protein FAM91A1                                                                                                                                                                                                                                                                                                                                                                                                                                                                                                      |
| 3226 | Q9HAB1           | 2                    | 2              | 5.3                   | 438    | 47170 | 6.8 | CDNA FLJ11863 fis, clone HEMBA1006926                                                                                                                                                                                                                                                                                                                                                                                                                                                                                |
| 3226 | UPI000045716A    | 2                    | 2              | 5.2                   | 439    | 47299 | 6.8 | solute carrier family 41, member 3 isoform 4                                                                                                                                                                                                                                                                                                                                                                                                                                                                         |
| 3226 | UPI000013FC30    | 2                    | 2              | 5                     | 461    | 49916 | 7.9 | solute carrier family 41, member 3 isoform 4                                                                                                                                                                                                                                                                                                                                                                                                                                                                         |
| 3226 | Q8NB27           | 2                    | 2              | 4.8                   | 478    | 51507 | 7.2 | CDNA FLJ34352 fis, clone FEBRA2011593                                                                                                                                                                                                                                                                                                                                                                                                                                                                                |
| 3226 | UPI00003D2133    | 2                    | 2              | 4.7                   | 487    | 52449 | 6.9 | solute carrier family 41, member 3 isoform 2                                                                                                                                                                                                                                                                                                                                                                                                                                                                         |
| 3226 | UPI00001AF113    | 2                    | 2              | 4.6                   | 496    | 53923 | 7.2 | solute carrier family 41, member 3 isoform 4                                                                                                                                                                                                                                                                                                                                                                                                                                                                         |
| 3226 | UPI000013D523    | 2                    | 2              | 4.5                   | 507    | 54767 | 7.8 | solute carrier family 41, member 3 isoform 4                                                                                                                                                                                                                                                                                                                                                                                                                                                                         |
| 3226 | Q96GZ6           | 2                    | 2              | 4.5                   | 507    | 54737 | 7.8 | Solute carrier family 41 member 3                                                                                                                                                                                                                                                                                                                                                                                                                                                                                    |
| 3227 | Q8NI20           | 2                    | 2              | 5.4                   | 790    | 86067 | 5.7 | Spermatogenesis associated factor protein                                                                                                                                                                                                                                                                                                                                                                                                                                                                            |
| 3227 | Q8NB90           | 2                    | 2              | 4.8                   | 893    | 97934 | 5.7 | Spermatogenesis-associated protein 5                                                                                                                                                                                                                                                                                                                                                                                                                                                                                 |
| 3227 | UPI000013D9E6    | 2                    | 2              | 4.8                   | 893    | 97904 | 5.7 | spermatogenesis associated factor SPAF                                                                                                                                                                                                                                                                                                                                                                                                                                                                               |
| 3227 | Q8TDL7           | 2                    | 2              | 4.8                   | 893    | 97920 | 5.7 | Spermatogenesis associated factor                                                                                                                                                                                                                                                                                                                                                                                                                                                                                    |
| 3228 | Q96HC3           | 2                    | 2              | 4.8                   | 538    | 60647 | 7.2 | CWF19-like protein 1                                                                                                                                                                                                                                                                                                                                                                                                                                                                                                 |
| 3228 | Q9NV13           | 2                    | 2              | 4.8                   | 538    | 60619 | 7.2 | CDNA FLJ10998 fis, clone PLACE1002465                                                                                                                                                                                                                                                                                                                                                                                                                                                                                |
| 3229 | A2VDI4           | 2                    | 9              | 4.7                   | 674    | 76138 | 6.5 | KIAA0143 protein                                                                                                                                                                                                                                                                                                                                                                                                                                                                                                     |
| 3229 | UPI000041A085    | 2                    | 9              | 4.1                   | 785    | 88802 | 6.5 | hypothetical protein LOC23167                                                                                                                                                                                                                                                                                                                                                                                                                                                                                        |
| 3229 | Q14156-3         | 2                    | 9              | 4.1                   | 777    | 87580 | 6.6 | Isoform 3 of Q14156                                                                                                                                                                                                                                                                                                                                                                                                                                                                                                  |
| 3229 | Q14156           | 2                    | 9              | 3.9                   | 821    | 92924 | 6.7 | Protein EFR3-like                                                                                                                                                                                                                                                                                                                                                                                                                                                                                                    |
| 3230 | Q8TD12           | 2                    | 3              | 6.8                   | 265    | 29370 | 8.4 | Decay-accelerating factor 3                                                                                                                                                                                                                                                                                                                                                                                                                                                                                          |
| 3230 | Q5VW88           | 2                    | 3              | 6.1                   | 293    | 32190 | 5.5 | CD55 molecule, decay accelerating factor for complement                                                                                                                                                                                                                                                                                                                                                                                                                                                              |
| 3230 | UPI0000D6209C    | 2                    | 3              | 5                     | 358    | 38991 | 7.4 | Complement decay-accelerating factor precursor (CD55 antigen).                                                                                                                                                                                                                                                                                                                                                                                                                                                       |
| 3230 | Q14UF5           | 2                    | 3              | 4.9                   | 364    | 39759 | 7.6 | Decay-accelerating factor splicing variant 2                                                                                                                                                                                                                                                                                                                                                                                                                                                                         |
| 3230 | P08174           | 2                    | 3              | 4.7                   | 381    | 41400 | 7.6 | Complement decay-accelerating factor precursor                                                                                                                                                                                                                                                                                                                                                                                                                                                                       |

| No.  | Accession Number | Unique Peptide Count | Spectrum Count | Sequence Coverage (%) | Length | MolWt | pI  | Descriptive Name                                                                 |
|------|------------------|----------------------|----------------|-----------------------|--------|-------|-----|----------------------------------------------------------------------------------|
| 3230 | UPI0000D6209A    | 2                    | 3              | 4.7                   | 381    | 41574 | 7.4 | Complement decay-accelerating factor precursor (CD55 antigen).                   |
| 3230 | Q14UF4           | 2                    | 3              | 4.7                   | 384    | 41900 | 7.9 | Decay-accelerating factor splicing variant 3                                     |
| 3230 | Q8TD13           | 2                    | 3              | 4.3                   | 422    | 44850 | 9.6 | Decay-accelerating factor 1 ab                                                   |
| 3230 | Q8TD11           | 2                    | 3              | 4.3                   | 419    | 44797 | 9.7 | Decay-accelerating factor 4ab                                                    |
| 3230 | UPI00004562EE    | 2                    | 3              | 4.1                   | 440    | 48744 | 8.4 | Complement decay-accelerating factor precursor (CD55 antigen).                   |
| 3230 | Q5VW91           | 2                    | 3              | 4.1                   | 444    | 49338 | 8.8 | CD55 molecule, decay accelerating factor for complement                          |
| 3230 | Q14UF6           | 2                    | 3              | 4.1                   | 439    | 48513 | 7.9 | Decay-accelerating factor splicing variant 1                                     |
| 3230 | P08174-2         | 2                    | 3              | 4.1                   | 440    | 48717 | 8.4 | Isoform 1 of P08174                                                              |
| 3230 | Q14UF3           | 2                    | 3              | 3.4                   | 525    | 56218 | 8.5 | Decay-accelerating factor splicing variant 4                                     |
| 3230 | Q14UF2           | 2                    | 3              | 3.3                   | 551    | 59038 | 8.8 | Decay-accelerating factor splicing variant 5                                     |
| 3231 | Q06587           | 2                    | 4              | 4.7                   | 406    | 42429 | 5.6 | E3 ubiquitin-protein ligase RING1                                                |
| 3232 | Q6P1Q2           | 2                    | 2              | 5.4                   | 484    | 52550 | 8.8 | N-PAC protein                                                                    |
| 3232 | Q9BT11           | 2                    | 2              | 5                     | 523    | 57215 | 9.2 | Similar to RIKEN cDNA 3930401K13 gene                                            |
| 3232 | UPI000059D307    | 2                    | 2              | 4.9                   | 536    | 58637 | 9.2 | cytokine-like nuclear factor n-pac                                               |
| 3232 | Q9BVK2           | 2                    | 2              | 4.8                   | 547    | 59828 | 9.3 | Cytokine-like nuclear factor n-pac                                               |
| 3232 | Q49A26           | 2                    | 2              | 4.7                   | 553    | 60606 | 9.2 | Cytokine-like nuclear factor n-pac                                               |
| 3232 | UPI00001FF8EE    | 2                    | 2              | 4.7                   | 553    | 60556 | 9.2 | cytokine-like nuclear factor n-pac                                               |
| 3232 | Q6V3W7           | 2                    | 2              | 4.7                   | 553    | 60547 | 9.2 | Cytokine-like nuclear factor n-pac-like protein                                  |
| 3232 | Q5U632           | 2                    | 2              | 4.7                   | 553    | 60548 | 9.1 | Cytokine-like nuclear factor n-pac                                               |
| 3233 | UPI00006C18D5    | 2                    | 3              | 6.5                   | 403    | 43994 | 6.2 | PREDICTED: similar to alveolar soft part sarcoma chromosome region, candidate 1  |
| 3233 | Q9BZE9           | 2                    | 3              | 4.7                   | 553    | 60183 | 6.6 | Tether containing UBX domain for GLUT4                                           |
| 3233 | Q9BZE9-2         | 2                    | 3              | 4                     | 647    | 69990 | 8.1 | Isoform 2 of Q9BZE9                                                              |
| 3234 | UPI0000D610A8    | 2                    | 4              | 8.5                   | 316    | 36720 | 6.7 | Nuclear receptor coactivator 5 (NCoA-5) (Coactivator independent of AF-2) (CIA). |
| 3234 | Q9HCD5           | 2                    | 4              | 4.7                   | 579    | 65536 | 9.6 | Nuclear receptor coactivator 5                                                   |
| 3235 | Q9NVH1-3         | 2                    | 6              | 5.1                   | 507    | 57197 | 7.5 | Isoform 3 of Q9NVH1                                                              |
| 3235 | UPI0000D61E3A    | 2                    | 6              | 5                     | 523    | 59173 | 7.6 | DnaJ homolog subfamily C member 11.                                              |
| 3235 | Q9NVH1-2         | 2                    | 6              | 5                     | 521    | 58947 | 7.6 | Isoform 2 of Q9NVH1                                                              |
| 3235 | Q9NVH1           | 2                    | 6              | 4.7                   | 559    | 63278 | 8.4 | DnaJ homolog subfamily C member 11                                               |
| 3235 | UPI000006D6B2    | 2                    | 6              | 4.7                   | 559    | 63336 | 8.4 | DnaJ (Hsp40) homolog, subfamily C, member 11                                     |
| 3236 | Q9UQB8-3         | 2                    | 3              | 5.1                   | 512    | 56626 | 9   | Isoform 3 of Q9UQB8                                                              |
| 3236 | Q9UQB8-6         | 2                    | 3              | 5                     | 522    | 57430 | 8.9 | Isoform 6 of Q9UQB8                                                              |
| 3236 | Q9UQB8-5         | 2                    | 3              | 5                     | 520    | 57445 | 8.8 | Isoform 5 of Q9UQB8                                                              |
| 3236 | Q9UQB8-4         | 2                    | 3              | 5                     | 521    | 57359 | 8.9 | Isoform 4 of Q9UQB8                                                              |
| 3236 | Q9UQB8-2         | 2                    | 3              | 4.9                   | 534    | 59014 | 9   | Isoform 2 of Q9UQB8                                                              |
| 3236 | Q9UQB8           | 2                    | 3              | 4.7                   | 552    | 60868 | 8.9 | Brain-specific angiogenesis inhibitor 1-associated protein 2                     |
| 3237 | A0AV58           | 2                    | 2              | 4.6                   | 713    | 77718 | 5.3 | Striatin, calmodulin binding protein 3                                           |
| 3237 | UPI0000456764    | 2                    | 2              | 4.6                   | 716    | 78195 | 5.3 | Striatin-3 (Cell-cycle autoantigen SG2NA) (S/G2 antigen).                        |
| 3237 | UPI00001B09B8    | 2                    | 2              | 4.6                   | 713    | 77696 | 5.3 | nuclear autoantigen                                                              |
| 3237 | Q13033-2         | 2                    | 2              | 4.6                   | 713    | 77669 | 5.3 | Isoform Alpha of Q13033                                                          |
| 3237 | A2RTX7           | 2                    | 2              | 4.6                   | 713    | 77745 | 5.3 | Striatin, calmodulin binding protein 3                                           |
| 3238 | A0S2X6           | 2                    | 8              | 4.6                   | 603    | 67055 | 9   | NADH dehydrogenase subunit 5                                                     |
| 3238 | Q4F4F8           | 2                    | 8              | 4.6                   | 603    | 67011 | 9   | NADH dehydrogenase subunit 5                                                     |
| 3238 | Q4F454           | 2                    | 8              | 4.6                   | 603    | 67087 | 9   | NADH dehydrogenase subunit 5                                                     |
| 3238 | Q4F3W3           | 2                    | 8              | 4.6                   | 603    | 67029 | 9   | NADH dehydrogenase subunit 5                                                     |
| 3238 | Q4F340           | 2                    | 8              | 4.6                   | 603    | 66984 | 9   | NADH dehydrogenase subunit 5                                                     |
| 3238 | Q4F2Y8           | 2                    | 8              | 4.6                   | 603    | 66963 | 9   | NADH dehydrogenase subunit 5                                                     |
| 3238 | Q4F2K8           | 2                    | 8              | 4.6                   | 603    | 67012 | 9   | NADH dehydrogenase subunit 5                                                     |
| 3238 | Q4F2F6           | 2                    | 8              | 4.6                   | 603    | 67027 | 9   | NADH dehydrogenase subunit 5                                                     |
| 3238 | Q4F200           | 2                    | 8              | 4.6                   | 603    | 67043 | 9   | NADH dehydrogenase subunit 5                                                     |
| 3238 | Q4F1S2           | 2                    | 8              | 4.6                   | 603    | 67069 | 9   | NADH dehydrogenase subunit 5                                                     |
| 3238 | Q4F0F4           | 2                    | 8              | 4.6                   | 603    | 67011 | 9   | NADH dehydrogenase subunit 5                                                     |
| 3238 | Q4F050           | 2                    | 8              | 4.6                   | 603    | 67039 | 9   | NADH dehydrogenase subunit 5                                                     |
| 3238 | Q4EZT3           | 2                    | 8              | 4.6                   | 603    | 67013 | 9   | NADH dehydrogenase subunit 5                                                     |
| 3238 | Q4EZS0           | 2                    | 8              | 4.6                   | 603    | 67027 | 9   | NADH dehydrogenase subunit 5                                                     |
| 3238 | Q4EZP4           | 2                    | 8              | 4.6                   | 603    | 67041 | 9   | NADH dehydrogenase subunit 5                                                     |
| 3238 | Q4EZ36           | 2                    | 8              | 4.6                   | 603    | 67023 | 9   | NADH dehydrogenase subunit 5                                                     |
| 3238 | Q4EYP3           | 2                    | 8              | 4.6                   | 603    | 67000 | 9   | NADH dehydrogenase subunit 5                                                     |
| 3238 | Q4EY48           | 2                    | 8              | 4.6                   | 603    | 66981 | 9   | NADH dehydrogenase subunit 5                                                     |
| 3238 | Q4EXY9           | 2                    | 8              | 4.6                   | 603    | 66971 | 9   | NADH dehydrogenase subunit 5                                                     |
| 3238 | Q4EXW4           | 2                    | 8              | 4.6                   | 603    | 67018 | 9   | NADH dehydrogenase subunit 5                                                     |
| 3238 | Q4EXU5           | 2                    | 8              | 4.6                   | 603    | 67004 | 9   | NADH dehydrogenase subunit 5                                                     |
| 3238 | Q4EXP2           | 2                    | 8              | 4.6                   | 603    | 67040 | 9   | NADH dehydrogenase subunit 5                                                     |
| 3238 | Q4EXM9           | 2                    | 8              | 4.6                   | 603    | 67043 | 9.1 | NADH dehydrogenase subunit 5                                                     |
| 3238 | Q4EWD7           | 2                    | 8              | 4.6                   | 603    | 67023 | 9   | NADH dehydrogenase subunit 5                                                     |
| 3238 | Q3S9H4           | 2                    | 8              | 4.6                   | 603    | 67057 | 9   | NADH dehydrogenase subunit 5                                                     |
| 3238 | Q306C1           | 2                    | 8              | 4.6                   | 603    | 67013 | 9   | NADH dehydrogenase subunit 5                                                     |
| 3238 | Q305W9           | 2                    | 8              | 4.6                   | 603    | 67000 | 9   | NADH dehydrogenase subunit 5                                                     |
| 3238 | Q2LHU9           | 2                    | 8              | 4.6                   | 603    | 66997 | 9   | NADH dehydrogenase subunit 5                                                     |
| 3238 | Q2LHB7           | 2                    | 8              | 4.6                   | 603    | 67017 | 9   | NADH dehydrogenase subunit 5                                                     |
| 3238 | Q2LH26           | 2                    | 8              | 4.6                   | 603    | 67057 | 9   | NADH dehydrogenase subunit 5                                                     |
| 3238 | Q2L743           | 2                    | 8              | 4.6                   | 603    | 67057 | 9   | NADH dehydrogenase subunit 5                                                     |
| 3238 | Q2HKQ7           | 2                    | 8              | 4.6                   | 603    | 67025 | 9   | NADH dehydrogenase subunit 5                                                     |

| No.  | Accession Number | Unique Peptide Count | Spectrum Count | Sequence Coverage (%) | Length | MolWt | pI  | Descriptive Name                                                                                                                                                  |
|------|------------------|----------------------|----------------|-----------------------|--------|-------|-----|-------------------------------------------------------------------------------------------------------------------------------------------------------------------|
| 3238 | Q2HKK5           | 2                    | 8              | 4.6                   | 603    | 67012 | 9   | NADH dehydrogenase subunit 5                                                                                                                                      |
| 3238 | Q2HJQ6           | 2                    | 8              | 4.6                   | 603    | 66967 | 9   | NADH dehydrogenase subunit 5                                                                                                                                      |
| 3238 | Q27H51           | 2                    | 8              | 4.6                   | 603    | 67057 | 9   | NADH dehydrogenase subunit 5                                                                                                                                      |
| 3238 | Q27H25           | 2                    | 8              | 4.6                   | 603    | 67043 | 9   | NADH dehydrogenase subunit 5                                                                                                                                      |
| 3238 | Q1ZY31           | 2                    | 8              | 4.6                   | 603    | 67072 | 9   | NADH dehydrogenase subunit 5                                                                                                                                      |
| 3238 | Q1W0U7           | 2                    | 8              | 4.6                   | 603    | 67042 | 9   | NADH dehydrogenase subunit 5                                                                                                                                      |
| 3238 | Q1ADM1           | 2                    | 8              | 4.6                   | 603    | 66998 | 9   | NADH dehydrogenase subunit 5                                                                                                                                      |
| 3238 | Q1ADK8           | 2                    | 8              | 4.6                   | 603    | 67040 | 9   | NADH dehydrogenase subunit 5                                                                                                                                      |
| 3238 | Q15I14           | 2                    | 8              | 4.6                   | 603    | 67013 | 9   | NADH dehydrogenase subunit 5                                                                                                                                      |
| 3238 | Q15ID2           | 2                    | 8              | 4.6                   | 603    | 67051 | 9   | NADH dehydrogenase subunit 5                                                                                                                                      |
| 3238 | Q15HM4           | 2                    | 8              | 4.6                   | 603    | 66986 | 9   | NADH dehydrogenase subunit 5                                                                                                                                      |
| 3238 | Q15HL1           | 2                    | 8              | 4.6                   | 603    | 67000 | 9   | NADH dehydrogenase subunit 5                                                                                                                                      |
| 3238 | Q15HH2           | 2                    | 8              | 4.6                   | 603    | 67042 | 9   | NADH dehydrogenase subunit 5                                                                                                                                      |
| 3238 | Q15HE6           | 2                    | 8              | 4.6                   | 603    | 67027 | 9   | NADH dehydrogenase subunit 5                                                                                                                                      |
| 3238 | Q15H42           | 2                    | 8              | 4.6                   | 603    | 66983 | 9   | NADH dehydrogenase subunit 5                                                                                                                                      |
| 3238 | Q15GZ0           | 2                    | 8              | 4.6                   | 603    | 67013 | 9   | NADH dehydrogenase subunit 5                                                                                                                                      |
| 3238 | Q15GW4           | 2                    | 8              | 4.6                   | 603    | 67013 | 9   | NADH dehydrogenase subunit 5                                                                                                                                      |
| 3238 | Q0ZK24           | 2                    | 8              | 4.6                   | 603    | 66997 | 9   | NADH dehydrogenase subunit 5                                                                                                                                      |
| 3238 | Q0ZFK3           | 2                    | 8              | 4.6                   | 603    | 67039 | 9   | NADH dehydrogenase subunit 5                                                                                                                                      |
| 3238 | Q0ZFC5           | 2                    | 8              | 4.6                   | 603    | 66999 | 9   | NADH dehydrogenase subunit 5                                                                                                                                      |
| 3238 | Q0Z7P8           | 2                    | 8              | 4.6                   | 603    | 66967 | 9   | NADH dehydrogenase subunit 5                                                                                                                                      |
| 3238 | Q0Z7K9           | 2                    | 8              | 4.6                   | 603    | 66971 | 9   | NADH dehydrogenase subunit 5                                                                                                                                      |
| 3238 | Q06V50           | 2                    | 8              | 4.6                   | 603    | 67000 | 9   | NADH dehydrogenase subunit 5                                                                                                                                      |
| 3238 | Q06UH9           | 2                    | 8              | 4.6                   | 603    | 67031 | 9   | NADH dehydrogenase subunit 5                                                                                                                                      |
| 3238 | Q06UC7           | 2                    | 8              | 4.6                   | 603    | 67000 | 9   | NADH dehydrogenase subunit 5                                                                                                                                      |
| 3238 | P03915           | 2                    | 8              | 4.6                   | 603    | 67027 | 9   | NADH-ubiquinone oxidoreductase chain 5                                                                                                                            |
| 3238 | A4GYN5           | 2                    | 8              | 4.6                   | 603    | 67016 | 9   | NADH dehydrogenase subunit 5                                                                                                                                      |
| 3238 | A3R0P4           | 2                    | 8              | 4.6                   | 603    | 67027 | 9   | NADH dehydrogenase subunit 5                                                                                                                                      |
| 3238 | A3R0N1           | 2                    | 8              | 4.6                   | 603    | 67069 | 9   | NADH dehydrogenase subunit 5                                                                                                                                      |
| 3238 | A3R0L8           | 2                    | 8              | 4.6                   | 603    | 67026 | 9.1 | NADH dehydrogenase subunit 5                                                                                                                                      |
| 3238 | A1Z550           | 2                    | 8              | 4.6                   | 603    | 67007 | 9   | NADH dehydrogenase subunit 5                                                                                                                                      |
| 3238 | A1Z4K5           | 2                    | 8              | 4.6                   | 603    | 67027 | 9   | NADH dehydrogenase subunit 5                                                                                                                                      |
| 3238 | A1Z4H9           | 2                    | 8              | 4.6                   | 603    | 67083 | 9   | NADH dehydrogenase subunit 5                                                                                                                                      |
| 3238 | A1Z4G6           | 2                    | 8              | 4.6                   | 603    | 66997 | 9   | NADH dehydrogenase subunit 5                                                                                                                                      |
| 3238 | A1E1L3           | 2                    | 8              | 4.6                   | 603    | 67005 | 9   | NADH dehydrogenase subunit 5                                                                                                                                      |
| 3238 | A1DVU9           | 2                    | 8              | 4.6                   | 603    | 67051 | 9   | NADH dehydrogenase subunit 5                                                                                                                                      |
| 3238 | A1DVT6           | 2                    | 8              | 4.6                   | 603    | 67054 | 9   | NADH dehydrogenase subunit 5                                                                                                                                      |
| 3238 | A1DVN4           | 2                    | 8              | 4.6                   | 603    | 67054 | 9   | NADH dehydrogenase subunit 5                                                                                                                                      |
| 3238 | A1DV00           | 2                    | 8              | 4.6                   | 603    | 67011 | 9   | NADH dehydrogenase subunit 5                                                                                                                                      |
| 3238 | A1DTY1           | 2                    | 8              | 4.6                   | 603    | 67044 | 9   | NADH dehydrogenase subunit 5                                                                                                                                      |
| 3238 | A1DTP0           | 2                    | 8              | 4.6                   | 603    | 67028 | 9   | NADH dehydrogenase subunit 5                                                                                                                                      |
| 3238 | A1DTE9           | 2                    | 8              | 4.6                   | 603    | 67000 | 9   | NADH dehydrogenase subunit 5                                                                                                                                      |
| 3238 | A1DTD6           | 2                    | 8              | 4.6                   | 603    | 67000 | 9   | NADH dehydrogenase subunit 5                                                                                                                                      |
| 3238 | A1DT71           | 2                    | 8              | 4.6                   | 603    | 67014 | 9   | NADH dehydrogenase subunit 5                                                                                                                                      |
| 3238 | A1DSY0           | 2                    | 8              | 4.6                   | 603    | 67070 | 9   | NADH dehydrogenase subunit 5                                                                                                                                      |
| 3238 | A1DSV4           | 2                    | 8              | 4.6                   | 603    | 67070 | 9   | NADH dehydrogenase subunit 5                                                                                                                                      |
| 3238 | A1DSU1           | 2                    | 8              | 4.6                   | 603    | 67026 | 9   | NADH dehydrogenase subunit 5                                                                                                                                      |
| 3238 | A1DSK0           | 2                    | 8              | 4.6                   | 603    | 67010 | 9   | NADH dehydrogenase subunit 5                                                                                                                                      |
| 3238 | A1DSD5           | 2                    | 8              | 4.6                   | 603    | 67010 | 9   | NADH dehydrogenase subunit 5                                                                                                                                      |
| 3238 | A0SBQ0           | 2                    | 8              | 4.6                   | 603    | 66953 | 8.9 | NADH dehydrogenase subunit 5                                                                                                                                      |
| 3238 | A0SBN6           | 2                    | 8              | 4.6                   | 603    | 66983 | 9   | NADH dehydrogenase subunit 5                                                                                                                                      |
| 3238 | A0SBJ7           | 2                    | 8              | 4.6                   | 603    | 67043 | 9   | NADH dehydrogenase subunit 5                                                                                                                                      |
| 3238 | A0SBH1           | 2                    | 8              | 4.6                   | 603    | 67017 | 9   | NADH dehydrogenase subunit 5                                                                                                                                      |
| 3238 | A0SB29           | 2                    | 8              | 4.6                   | 603    | 67087 | 9   | NADH dehydrogenase subunit 5                                                                                                                                      |
| 3238 | A0S952           | 2                    | 8              | 4.6                   | 603    | 67033 | 9   | NADH dehydrogenase subunit 5                                                                                                                                      |
| 3238 | A0S939           | 2                    | 8              | 4.6                   | 603    | 67033 | 9   | NADH dehydrogenase subunit 5                                                                                                                                      |
| 3238 | A0S8Q9           | 2                    | 8              | 4.6                   | 603    | 67081 | 9   | NADH dehydrogenase subunit 5                                                                                                                                      |
| 3238 | A0S811           | 2                    | 8              | 4.6                   | 603    | 67033 | 9   | NADH dehydrogenase subunit 5                                                                                                                                      |
| 3238 | A0S4F9           | 2                    | 8              | 4.6                   | 603    | 67015 | 9   | NADH dehydrogenase subunit 5                                                                                                                                      |
| 3238 | A0S481           | 2                    | 8              | 4.6                   | 603    | 66979 | 9   | NADH dehydrogenase subunit 5                                                                                                                                      |
| 3238 | A0S302           | 2                    | 8              | 4.6                   | 603    | 67041 | 9   | NADH dehydrogenase subunit 5                                                                                                                                      |
| 3239 | O43264           | 2                    | 4              | 4.6                   | 779    | 88830 | 6.3 | Centromere/kinetochore protein zw10 homolog                                                                                                                       |
| 3240 | Q7Z7E9           | 2                    | 2              | 6.8                   | 384    | 40283 | 9.1 | BLOM7 gamma                                                                                                                                                       |
| 3240 | O94981           | 2                    | 2              | 4.6                   | 569    | 59608 | 8.4 | KIAA0907 protein                                                                                                                                                  |
| 3240 | Q7Z7F0           | 2                    | 2              | 4.2                   | 614    | 64845 | 8.7 | Protein KIAA0907                                                                                                                                                  |
| 3241 | P09960-2         | 2                    | 2              | 5.2                   | 537    | 60704 | 5.6 | Isoform 2 of P09960                                                                                                                                               |
| 3241 | P09960           | 2                    | 2              | 4.6                   | 611    | 69285 | 6.2 | Leukotriene A-4 hydrolase (EC 3.3.2.6) (LTA-4 hydrolase) (Leukotriene A(4) hydrolase)                                                                             |
| 3242 | UPI000D615AF     | 2                    | 6              | 6.7                   | 344    | 38821 | 8.5 | Calcium/calmodulin-dependent protein kinase type II delta chain (EC 2.7.11.17) (CaM-kinase II delta chain) (CaM kinase II subunit delta) (CaMK-II subunit delta). |
| 3242 | Q4G1A8           | 2                    | 6              | 6.7                   | 344    | 38880 | 9   | CAMK2D protein                                                                                                                                                    |
| 3242 | Q13557-8         | 2                    | 6              | 4.8                   | 478    | 54128 | 7.3 | Isoform Delta 6 of Q13557                                                                                                                                         |
| 3242 | UPI000D615AE     | 2                    | 6              | 4.7                   | 489    | 55378 | 7.7 | Calcium/calmodulin-dependent protein kinase type II delta chain (EC 2.7.11.17) (CaM-kinase II delta chain) (CaM kinase II subunit delta) (CaMK-II subunit delta). |
| 3242 | Q13557-9         | 2                    | 6              | 4.7                   | 488    | 55250 | 7.6 | Isoform Delta 7 of Q13557                                                                                                                                         |



| No.  | Accession Number | Unique Peptide Count | Spectrum Count | Sequence Coverage (%) | Length | MolWt  | pI   | Descriptive Name                                                                                                                                                                                              |
|------|------------------|----------------------|----------------|-----------------------|--------|--------|------|---------------------------------------------------------------------------------------------------------------------------------------------------------------------------------------------------------------|
| 3242 | Q13557           | 2                    | 6              | 4.6                   | 499    | 56369  | 7.2  | Calcium/calmodulin-dependent protein kinase type II delta chain                                                                                                                                               |
| 3242 | Q13557-5         | 2                    | 6              | 4.6                   | 497    | 56102  | 7.3  | Isoform Delta 8 of Q13557                                                                                                                                                                                     |
| 3242 | Q13557-11        | 2                    | 6              | 4.6                   | 498    | 56298  | 7.2  | Isoform Delta 11 of Q13557                                                                                                                                                                                    |
| 3242 | Q13557-6         | 2                    | 6              | 4.5                   | 512    | 57773  | 7    | Isoform Delta 9 of Q13557                                                                                                                                                                                     |
| 3242 | Q13557-3         | 2                    | 6              | 4.5                   | 509    | 57492  | 7.5  | Isoform Delta 3 of Q13557                                                                                                                                                                                     |
| 3242 | Q13557-4         | 2                    | 6              | 4.4                   | 518    | 58344  | 7.2  | Isoform Delta 4 of Q13557                                                                                                                                                                                     |
| 3243 | UPI000006F0A2    | 2                    | 2              | 6.1                   | 311    | 34819  | 5.9  | hypothetical protein LOC23172                                                                                                                                                                                 |
| 3243 | Q15018           | 2                    | 2              | 4.6                   | 415    | 46901  | 6.2  | Uncharacterized protein KIAA0157                                                                                                                                                                              |
| 3244 | Q15554           | 2                    | 2              | 4.6                   | 500    | 55551  | 9.2  | Telomeric repeat-binding factor 2                                                                                                                                                                             |
| 3245 | Q9NQX3           | 2                    | 2              | 4.6                   | 736    | 79748  | 5.4  | Gephyrin                                                                                                                                                                                                      |
| 3245 | Q9NQX3-2         | 2                    | 2              | 4.4                   | 769    | 83447  | 5.6  | Isoform 2 of Q9NQX3                                                                                                                                                                                           |
| 3246 | Q5TCW7           | 2                    | 2              | 5                     | 541    | 61804  | 7.9  | RNA guanylyltransferase and 5'-phosphatase                                                                                                                                                                    |
| 3246 | O60942-4         | 2                    | 2              | 5                     | 541    | 61705  | 7.7  | Isoform 4 of O60942                                                                                                                                                                                           |
| 3246 | O60942-2         | 2                    | 2              | 4.7                   | 574    | 66042  | 8.4  | Isoform 2 of O60942                                                                                                                                                                                           |
| 3246 | O60942           | 2                    | 2              | 4.5                   | 597    | 68557  | 8.1  | mRNA-capping enzyme (HCE) (HCAP1) [Includes: Polynucleotide 5'- triphosphatase (EC 3.1.3.33) (mRNA 5'-triphosphatase) (TPase); mRNA guanylyltransferase (EC 2.7.7.50) (GTP--RNA guanylyltransferase) (GTase)] |
| 3246 | Q8WUM8           | 2                    | 2              | 4.5                   | 597    | 68542  | 8    | RNA guanylyltransferase and 5'-phosphatase                                                                                                                                                                    |
| 3247 | P43007           | 2                    | 4              | 4.5                   | 532    | 55723  | 6.3  | Neutral amino acid transporter A                                                                                                                                                                              |
| 3247 | Q53F03           | 2                    | 4              | 4.5                   | 532    | 55723  | 6.3  | Solute carrier family 1, member 4 variant                                                                                                                                                                     |
| 3248 | UPI000013F63F    | 2                    | 2              | 4.7                   | 491    | 55217  | 9.7  | ATP-dependent RNA helicase ROK1 isoform b                                                                                                                                                                     |
| 3248 | Q59H21           | 2                    | 2              | 4.5                   | 512    | 57758  | 9.4  | ATP-dependent RNA helicase ROK1 isoform a variant                                                                                                                                                             |
| 3248 | UPI0000046805    | 2                    | 2              | 3.8                   | 599    | 67498  | 9.7  | ATP-dependent RNA helicase ROK1 isoform a                                                                                                                                                                     |
| 3248 | Q9Y2R4           | 2                    | 2              | 3.8                   | 599    | 67466  | 9.7  | Probable ATP-dependent RNA helicase DDX52                                                                                                                                                                     |
| 3249 | Q6UN15-4         | 2                    | 5              | 7.1                   | 378    | 40835  | 4.7  | Isoform 4 of Q6UN15                                                                                                                                                                                           |
| 3249 | Q6UN15-3         | 2                    | 5              | 5.2                   | 520    | 58376  | 5.6  | Isoform 3 of Q6UN15                                                                                                                                                                                           |
| 3249 | Q6UN15-2         | 2                    | 5              | 4.8                   | 559    | 63048  | 6.5  | Isoform 2 of Q6UN15                                                                                                                                                                                           |
| 3249 | Q6UN15           | 2                    | 5              | 4.5                   | 594    | 66526  | 5.6  | Pre-mRNA 3'-end-processing factor FIP1                                                                                                                                                                        |
| 3250 | Q9P0J1           | 2                    | 4              | 4.5                   | 537    | 61054  | 6.7  | [Pyruvate dehydrogenase [lipoamide]]-phosphatase 1, mitochondrial precursor                                                                                                                                   |
| 3251 | Q9HCH4           | 2                    | 2              | 4.5                   | 446    | 51474  | 5.5  | KIAA1598 protein                                                                                                                                                                                              |
| 3251 | A0MZ66           | 2                    | 2              | 4.4                   | 456    | 52636  | 5.4  | Shootin1                                                                                                                                                                                                      |
| 3251 | Q68DG1           | 2                    | 2              | 3.1                   | 649    | 73609  | 5.4  | Protein KIAA1598                                                                                                                                                                                              |
| 3252 | A2A2V2           | 2                    | 2              | 4.4                   | 408    | 45918  | 10.1 | Novel protein                                                                                                                                                                                                 |
| 3252 | P42696           | 2                    | 2              | 4.2                   | 430    | 48565  | 10.1 | RNA-binding protein 34                                                                                                                                                                                        |
| 3253 | Q4AEJ5           | 2                    | 4              | 4.4                   | 523    | 59249  | 6.6  | KIAA0488 protein                                                                                                                                                                                              |
| 3253 | Q5VWB2           | 2                    | 4              | 4.4                   | 528    | 59811  | 6.3  | Sorting nexin family member 27                                                                                                                                                                                |
| 3253 | Q5VWB1           | 2                    | 4              | 4.3                   | 541    | 61265  | 6.5  | Sorting nexin family member 27                                                                                                                                                                                |
| 3254 | Q96J85           | 2                    | 4              | 7.7                   | 375    | 42505  | 6.1  | C-Mpl binding protein                                                                                                                                                                                         |
| 3254 | Q6ZV14           | 2                    | 4              | 4.4                   | 654    | 73149  | 7.8  | CDNA FLJ43123 fis, clone CTONG3003972                                                                                                                                                                         |
| 3254 | UPI000045660C    | 2                    | 4              | 4.4                   | 653    | 72382  | 6.2  | La-related protein 4 (La ribonucleoprotein domain family member 4).                                                                                                                                           |
| 3254 | UPI0000231CB7    | 2                    | 4              | 4.4                   | 653    | 72400  | 6.3  | c-Mpl binding protein isoform c                                                                                                                                                                               |
| 3254 | UPI000045660B    | 2                    | 4              | 4                     | 730    | 81226  | 6.5  | La-related protein 4 (La ribonucleoprotein domain family member 4).                                                                                                                                           |
| 3254 | UPI0000231CB8    | 2                    | 4              | 4                     | 730    | 81244  | 6.6  | c-Mpl binding protein isoform b                                                                                                                                                                               |
| 3254 | UPI0000141A27    | 2                    | 4              | 4                     | 724    | 80624  | 6.6  | c-Mpl binding protein isoform a                                                                                                                                                                               |
| 3254 | Q71RC2           | 2                    | 4              | 4                     | 723    | 80468  | 6.6  | La-related protein 4                                                                                                                                                                                          |
| 3255 | Q96NJ5           | 2                    | 2              | 4.4                   | 620    | 70363  | 6.4  | Kelch-like protein 32                                                                                                                                                                                         |
| 3255 | UPI000006D428    | 2                    | 2              | 4.4                   | 620    | 70352  | 6.4  | KIAA1900                                                                                                                                                                                                      |
| 3255 | UPI000006D149D   | 2                    | 2              | 4.3                   | 622    | 70594  | 6.5  | BTB and kelch domain-containing protein 5.                                                                                                                                                                    |
| 3256 | Q9HCW0           | 2                    | 6              | 6.5                   | 340    | 39829  | 8.4  | Primase, polypeptide 2A, 58kDa                                                                                                                                                                                |
| 3256 | P49643           | 2                    | 6              | 4.3                   | 509    | 58806  | 7.9  | DNA primase large subunit                                                                                                                                                                                     |
| 3257 | Q08AM6           | 2                    | 5              | 4.3                   | 782    | 87973  | 6.1  | Vac14 homolog                                                                                                                                                                                                 |
| 3257 | UPI0000DD83A9    | 2                    | 5              | 2.7                   | 1240   | 135879 | 8.6  | PREDICTED: similar to Vac14 homolog                                                                                                                                                                           |
| 3258 | Q13144           | 2                    | 4              | 4.3                   | 721    | 80366  | 5.1  | Translation initiation factor eIF-2B subunit epsilon                                                                                                                                                          |
| 3258 | UPI000013D9CF    | 2                    | 4              | 4.3                   | 721    | 80380  | 5.1  | eukaryotic translation initiation factor 2B, subunit 5 epsilon, 82kDa                                                                                                                                         |
| 3259 | Q14680           | 2                    | 2              | 4.3                   | 651    | 74642  | 8.7  | Maternal embryonic leucine zipper kinase                                                                                                                                                                      |
| 3259 | Q53GX0           | 2                    | 2              | 4.3                   | 651    | 74642  | 8.7  | Maternal embryonic leucine zipper kinase variant                                                                                                                                                              |
| 3260 | Q8ND56           | 2                    | 2              | 4.3                   | 463    | 50530  | 9.5  | LSM14 protein homolog A                                                                                                                                                                                       |
| 3260 | UPI000006F08C    | 2                    | 2              | 4.3                   | 463    | 50526  | 9.4  | LSM14 homolog A                                                                                                                                                                                               |
| 3260 | Q8ND56-2         | 2                    | 2              | 4.3                   | 463    | 50554  | 9.5  | Isoform 2 of Q8ND56                                                                                                                                                                                           |
| 3261 | Q9H943           | 2                    | 3              | 4.3                   | 628    | 71506  | 9.3  | Uncharacterized protein C10orf68                                                                                                                                                                              |
| 3261 | Q9H943-2         | 2                    | 3              | 3.9                   | 692    | 78463  | 9.1  | Isoform 2 of Q9H943                                                                                                                                                                                           |
| 3262 | Q8IZW2           | 2                    | 2              | 4.5                   | 462    | 49917  | 5.6  | TAB1-like protein                                                                                                                                                                                             |
| 3262 | Q15750           | 2                    | 2              | 4.2                   | 504    | 54644  | 5.5  | Mitogen-activated protein kinase kinase kinase 7-interacting protein 1                                                                                                                                        |
| 3262 | Q59FT7           | 2                    | 2              | 3.2                   | 648    | 70265  | 5.3  | Mitogen-activated protein kinase kinase kinase 7 interacting protein 1 isoform alpha variant                                                                                                                  |
| 3263 | UPI0000D62393    | 2                    | 2              | 4.5                   | 573    | 65651  | 6.5  | Exocyst complex component 7 (Exocyst complex component Exo70).                                                                                                                                                |
| 3263 | Q63HP7           | 2                    | 2              | 4.5                   | 573    | 65663  | 6.6  | Hypothetical protein DKFZp686P1551                                                                                                                                                                            |
| 3263 | Q5G0E1           | 2                    | 2              | 4.2                   | 616    | 70201  | 7    | 2-5-3p                                                                                                                                                                                                        |
| 3263 | Q9UPT5-2         | 2                    | 2              | 4                     | 653    | 74713  | 6.4  | Isoform 2 of Q9UPT5                                                                                                                                                                                           |

| No.  | Accession Number | Unique Peptide Count | Spectrum Count | Sequence Coverage (%) | Length | MolWt  | pI  | Descriptive Name                                                                                                                                                                                                                                                |
|------|------------------|----------------------|----------------|-----------------------|--------|--------|-----|-----------------------------------------------------------------------------------------------------------------------------------------------------------------------------------------------------------------------------------------------------------------|
| 3263 | Q9UPT5-1         | 2                    | 2              | 3.8                   | 684    | 78060  | 6.7 | Isoform 1 of Q9UPT5                                                                                                                                                                                                                                             |
| 3263 | Q9UPT5           | 2                    | 2              | 3.5                   | 735    | 83382  | 6.8 | Exocyst complex component 7                                                                                                                                                                                                                                     |
| 3264 | Q5JUA8           | 2                    | 2              | 4.2                   | 525    | 59347  | 7.5 | Vacuolar protein sorting 16                                                                                                                                                                                                                                     |
| 3264 | Q9H269-2         | 2                    | 2              | 3.2                   | 695    | 78300  | 7.9 | Isoform 2 of Q9H269                                                                                                                                                                                                                                             |
| 3264 | UPI0000D6101F    | 2                    | 2              | 2.6                   | 839    | 94679  | 6.8 | Vacuolar protein sorting-associated protein 16 (hVPS16).                                                                                                                                                                                                        |
| 3264 | Q9H269           | 2                    | 2              | 2.6                   | 839    | 94694  | 6.8 | Vacuolar protein sorting-associated protein 16 homolog                                                                                                                                                                                                          |
| 3265 | Q6PEW1           | 2                    | 2              | 4.2                   | 402    | 45370  | 6.2 | Zinc finger CCHC domain-containing protein 12                                                                                                                                                                                                                   |
| 3265 | UPI0000072244    | 2                    | 2              | 4.2                   | 403    | 45160  | 7.4 | UPI0000072244 UniRef100 entry                                                                                                                                                                                                                                   |
| 3266 | Q86YA8           | 2                    | 2              | 4.2                   | 520    | 56757  | 6.6 | YLPM1 protein                                                                                                                                                                                                                                                   |
| 3266 | UPI00006C1433    | 2                    | 2              | 1                     | 2146   | 241643 | 6.6 | PREDICTED: similar to YLP motif-containing protein 1 (Nuclear protein ZAP3) (ZAP113) isoform 2                                                                                                                                                                  |
| 3267 | UPI000045613B    | 2                    | 2              | 4.9                   | 634    | 69185  | 8.2 | KIAA2013 (KIAA2013), mRNA                                                                                                                                                                                                                                       |
| 3267 | Q8IYS2           | 2                    | 2              | 4.9                   | 634    | 69157  | 8.2 | KIAA2013                                                                                                                                                                                                                                                        |
| 3267 | Q8IVF8           | 2                    | 2              | 4.2                   | 730    | 79352  | 9.6 | Protein KIAA2013                                                                                                                                                                                                                                                |
| 3268 | Q96CV9           | 2                    | 4              | 4.2                   | 577    | 65922  | 5.2 | Optineurin                                                                                                                                                                                                                                                      |
| 3268 | UPI000046FEE5    | 2                    | 4              | 4.2                   | 571    | 65202  | 5.2 | Optineurin (Optic neuropathy-inducing protein) (E3-14.7K-interacting protein) (FIP-2) (Huntingtin-interacting protein HYPL) (NEMO-related protein) (Transcription factor IIIA-interacting protein) (TFIIIA-IntP).                                               |
| 3268 | UPI000013D38D    | 2                    | 4              | 4.2                   | 577    | 65921  | 5.2 | Optineurin (Optic neuropathy-inducing protein) (E3-14.7K-interacting protein) (FIP-2) (Huntingtin-interacting protein HYPL) (NEMO-related protein) (Transcription factor IIIA-interacting protein) (TFIIIA-IntP).                                               |
| 3268 | Q96CV9-2         | 2                    | 4              | 4.2                   | 571    | 65203  | 5.1 | Isoform 2 of Q96CV9                                                                                                                                                                                                                                             |
| 3269 | Q9HA87           | 2                    | 4              | 4.2                   | 542    | 63216  | 5.1 | CDNA FLJ12068 fis, clone HEMBB1002329                                                                                                                                                                                                                           |
| 3269 | Q9HCG0           | 2                    | 4              | 4.2                   | 550    | 64187  | 5.1 | 2-oxoglutarate and iron-dependent oxygenase domain-containing protein 1                                                                                                                                                                                         |
| 3270 | Q9Y450           | 2                    | 7              | 4.2                   | 684    | 75473  | 6.6 | HBS1-like protein                                                                                                                                                                                                                                               |
| 3271 | O00566           | 2                    | 2              | 4.1                   | 681    | 78864  | 4.9 | U3 small nucleolar ribonucleoprotein protein MPP10                                                                                                                                                                                                              |
| 3272 | O15091           | 2                    | 3              | 4.1                   | 567    | 65486  | 8.5 | Uncharacterized protein KIAA0391                                                                                                                                                                                                                                |
| 3272 | Q8N5L5           | 2                    | 3              | 3.9                   | 583    | 67315  | 8.8 | KIAA0391                                                                                                                                                                                                                                                        |
| 3272 | Q86YB5           | 2                    | 3              | 3.9                   | 583    | 67288  | 8.8 | KIAA0391                                                                                                                                                                                                                                                        |
| 3273 | O60826           | 2                    | 4              | 4.1                   | 627    | 70756  | 6.8 | Coiled-coil domain-containing protein 22                                                                                                                                                                                                                        |
| 3274 | UPI0000456358    | 2                    | 3              | 4.2                   | 578    | 66787  | 5.6 | Regulator of nonsense transcripts 2 (Nonsense mRNA reducing factor 2) (Up-frameshift suppressor 2 homolog) (hUpf2).                                                                                                                                             |
| 3274 | Q5W0J4           | 2                    | 3              | 4.1                   | 579    | 66842  | 5.7 | UPF2 regulator of nonsense transcripts homolog                                                                                                                                                                                                                  |
| 3274 | Q9HAU5           | 2                    | 3              | 1.9                   | 1272   | 147810 | 5.7 | Regulator of nonsense transcripts 2                                                                                                                                                                                                                             |
| 3275 | Q85KV2           | 2                    | 8              | 4.1                   | 459    | 51623  | 9.4 | NADH dehydrogenase subunit 4                                                                                                                                                                                                                                    |
| 3276 | Q8NA66           | 2                    | 2              | 4.1                   | 436    | 50224  | 9.1 | Cyclic nucleotide-binding domain-containing protein 1                                                                                                                                                                                                           |
| 3276 | UPI00004576C7    | 2                    | 2              | 4.1                   | 436    | 50239  | 9.1 | cyclic nucleotide binding domain containing 1                                                                                                                                                                                                                   |
| 3277 | Q96K12           | 2                    | 2              | 4.1                   | 515    | 59439  | 9.4 | Fatty acyl-CoA reductase 2                                                                                                                                                                                                                                      |
| 3277 | Q9NUX8           | 2                    | 2              | 4.1                   | 515    | 59339  | 9.3 | CDNA FLJ11065 fis, clone PLACE1004868, weakly similar to MALE STERILITY PROTEIN 2                                                                                                                                                                               |
| 3278 | Q9BQD0           | 2                    | 10             | 4.1                   | 607    | 70305  | 8.1 | NLN protein                                                                                                                                                                                                                                                     |
| 3278 | Q9BYT8           | 2                    | 10             | 3.6                   | 704    | 80652  | 6.6 | Neurolysin, mitochondrial precursor                                                                                                                                                                                                                             |
| 3279 | Q9NVM9           | 2                    | 2              | 4.1                   | 706    | 80225  | 6.7 | Uncharacterized protein C12orf11                                                                                                                                                                                                                                |
| 3279 | UPI0000073AB1    | 2                    | 2              | 4.1                   | 706    | 80103  | 6.8 | hypothetical protein LOC55726                                                                                                                                                                                                                                   |
| 3280 | Q5TBH6           | 2                    | 3              | 12.2                  | 222    | 25225  | 8.7 | Glyceronephosphate O-acyltransferase                                                                                                                                                                                                                            |
| 3280 | Q5TBH8           | 2                    | 3              | 4.6                   | 587    | 67046  | 6.3 | Glyceronephosphate O-acyltransferase                                                                                                                                                                                                                            |
| 3280 | O15228           | 2                    | 3              | 4                     | 680    | 77188  | 6.6 | Dihydroxyacetone phosphate acyltransferase                                                                                                                                                                                                                      |
| 3280 | Q53H08           | 2                    | 3              | 4                     | 680    | 77162  | 6.6 | Glyceronephosphate O-acyltransferase variant                                                                                                                                                                                                                    |
| 3280 | Q53FI2           | 2                    | 3              | 4                     | 680    | 77089  | 6.4 | Glyceronephosphate O-acyltransferase variant                                                                                                                                                                                                                    |
| 3280 | Q59EC9           | 2                    | 3              | 3.9                   | 693    | 78595  | 6.8 | Glyceronephosphate O-acyltransferase variant                                                                                                                                                                                                                    |
| 3281 | UPI0000456A75    | 2                    | 6              | 4.8                   | 395    | 41554  | 10  | Zinc finger protein 207.                                                                                                                                                                                                                                        |
| 3281 | Q53XS9           | 2                    | 6              | 4.8                   | 395    | 41559  | 9.9 | Zinc finger protein 207                                                                                                                                                                                                                                         |
| 3281 | O43670-2         | 2                    | 6              | 4.1                   | 463    | 49692  | 9.1 | Isoform 2 of O43670                                                                                                                                                                                                                                             |
| 3281 | O43670           | 2                    | 6              | 4                     | 478    | 50751  | 9.1 | Zinc finger protein 207                                                                                                                                                                                                                                         |
| 3281 | Q59G94           | 2                    | 6              | 3.8                   | 496    | 52856  | 9   | Zinc finger protein 207 variant                                                                                                                                                                                                                                 |
| 3282 | P36406-3         | 2                    | 9              | 4.2                   | 546    | 61068  | 6.4 | Isoform Gamma of P36406                                                                                                                                                                                                                                         |
| 3282 | P36406           | 2                    | 9              | 4                     | 574    | 64067  | 6.4 | GTP-binding protein ARD-1                                                                                                                                                                                                                                       |
| 3282 | P36406-2         | 2                    | 9              | 4                     | 569    | 63690  | 6.4 | Isoform Beta of P36406                                                                                                                                                                                                                                          |
| 3283 | Q5JPC7           | 2                    | 2              | 4                     | 471    | 53610  | 7.2 | Hypothetical protein DKFZp667E137                                                                                                                                                                                                                               |
| 3283 | Q86U73           | 2                    | 2              | 4                     | 471    | 53644  | 7.2 | Flavin containing monooxygenase 2                                                                                                                                                                                                                               |
| 3283 | Q99518           | 2                    | 2              | 3.6                   | 535    | 60907  | 8.3 | Dimethylaniline monooxygenase [N-oxide-forming] 2                                                                                                                                                                                                               |
| 3284 | Q8IYI6           | 2                    | 2              | 4                     | 725    | 81799  | 5.5 | Exocyst complex component 8                                                                                                                                                                                                                                     |
| 3285 | Q8IZ52           | 2                    | 5              | 4                     | 775    | 85495  | 7   | Chondroitin sulfate synthase 2                                                                                                                                                                                                                                  |
| 3285 | UPI00001AE6D6    | 2                    | 5              | 4                     | 775    | 85467  | 6.9 | Chondroitin sulfate synthase 2 (EC 2.4.1.175) (Glucuronosyl-N- acetylgalactosaminyl-proteoglycan 4-beta-N- acetylgalactosaminyltransferase II) (N-acetylgalactosaminyl- proteoglycan 3-beta-glucuronosyltransferase II) (EC 2.4.1.226) (Chondroitin glucuronylt |
| 3286 | Q96EB6           | 2                    | 3              | 4                     | 747    | 81681  | 4.7 | NAD-dependent deacetylase sirtuin-1                                                                                                                                                                                                                             |

| No.  | Accession Number | Unique Peptide Count | Spectrum Count | Sequence Coverage (%) | Length | MolWt  | pI  | Descriptive Name                                                                                                                                        |
|------|------------------|----------------------|----------------|-----------------------|--------|--------|-----|---------------------------------------------------------------------------------------------------------------------------------------------------------|
| 3287 | Q9BYH2           | 2                    | 12             | 4                     | 494    | 54424  | 9.2 | Cystine/glutamate exchanger                                                                                                                             |
| 3287 | Q9UPY5           | 2                    | 12             | 4                     | 501    | 55423  | 9.2 | Cystine/glutamate transporter                                                                                                                           |
| 3288 | A2CEE0           | 2                    | 3              | 3.9                   | 698    | 77529  | 7.7 | Quiescin Q6-like 1                                                                                                                                      |
| 3288 | UPI0000D6194B    | 2                    | 3              | 3.9                   | 698    | 77420  | 7.4 | Sulfhydryl oxidase 2 precursor (EC 1.8.3.2) (Quiescin Q6-like protein 1) (Neuroblastoma-derived sulfhydryl oxidase).                                    |
| 3288 | UPI0000D6194A    | 2                    | 3              | 3.9                   | 700    | 77756  | 7.7 | Sulfhydryl oxidase 2 precursor (EC 1.8.3.2) (Quiescin Q6-like protein 1) (Neuroblastoma-derived sulfhydryl oxidase).                                    |
| 3288 | Q6ZRP7           | 2                    | 3              | 3.9                   | 698    | 77543  | 7.7 | Sulfhydryl oxidase 2 precursor                                                                                                                          |
| 3289 | Q8NDZ7           | 2                    | 3              | 4.2                   | 500    | 55072  | 5   | RBBP5 protein                                                                                                                                           |
| 3289 | Q15291           | 2                    | 3              | 3.9                   | 538    | 59082  | 5.1 | Retinoblastoma-binding protein 5                                                                                                                        |
| 3289 | Q7Z6D8           | 2                    | 3              | 3.9                   | 538    | 59153  | 5.1 | Retinoblastoma binding protein 5                                                                                                                        |
| 3290 | Q8TED0           | 2                    | 2              | 3.9                   | 518    | 58355  | 9.1 | U3 small nucleolar RNA-associated protein 15 homolog                                                                                                    |
| 3290 | UPI000020CADC    | 2                    | 2              | 3.9                   | 518    | 58415  | 9.1 | UTP15, U3 small nucleolar ribonucleoprotein, homolog                                                                                                    |
| 3291 | Q9UK59           | 2                    | 2              | 3.9                   | 544    | 61555  | 5.5 | Lariat debranching enzyme                                                                                                                               |
| 3292 | Q2Y122           | 2                    | 6              | 3.8                   | 764    | 85884  | 8.2 | Transient receptor potential vanilloid 4 channel variant E                                                                                              |
| 3292 | Q9HBA0-2         | 2                    | 6              | 3.6                   | 811    | 91261  | 8.2 | Isoform 2 of Q9HBA0                                                                                                                                     |
| 3292 | Q2Y124           | 2                    | 6              | 3.5                   | 824    | 92904  | 7.6 | Transient receptor potential vanilloid 4 channel variant C                                                                                              |
| 3292 | Q2Y123           | 2                    | 6              | 3.5                   | 837    | 94998  | 8.2 | Transient receptor potential vanilloid 4 channel variant D                                                                                              |
| 3292 | Q9HBA0-3         | 2                    | 6              | 3.4                   | 853    | 96449  | 8.4 | Isoform 3 of Q9HBA0                                                                                                                                     |
| 3292 | Q9HBA0           | 2                    | 6              | 3.3                   | 871    | 98281  | 7.8 | Transient receptor potential cation channel subfamily V member 4                                                                                        |
| 3293 | Q68E02           | 2                    | 4              | 3.8                   | 710    | 78418  | 6.8 | Hypothetical protein DKFZp686I1650                                                                                                                      |
| 3293 | Q8NI36           | 2                    | 4              | 2.8                   | 951    | 105322 | 7.5 | WD repeat protein 36                                                                                                                                    |
| 3294 | Q86YR5           | 2                    | 2              | 3.8                   | 652    | 72136  | 6.5 | G-protein-signaling modulator 1                                                                                                                         |
| 3295 | Q9H118           | 2                    | 2              | 3.8                   | 757    | 86360  | 5.2 | Activating signal cointegrator 1 complex subunit 2                                                                                                      |
| 3296 | A2BEX3           | 2                    | 5              | 4.1                   | 467    | 51803  | 5.5 | MutS homolog 5                                                                                                                                          |
| 3296 | Q59EC5           | 2                    | 5              | 3.9                   | 489    | 54471  | 5.7 | MSH5 protein variant                                                                                                                                    |
| 3296 | A2BEX2           | 2                    | 5              | 3.8                   | 497    | 54787  | 5.9 | MutS homolog 5                                                                                                                                          |
| 3296 | A2ABF0           | 2                    | 5              | 3.7                   | 508    | 56121  | 5.9 | MutS homolog 5                                                                                                                                          |
| 3296 | Q5SSQ8           | 2                    | 5              | 2.3                   | 821    | 91734  | 6.2 | MutS homolog 5                                                                                                                                          |
| 3296 | O43196-2         | 2                    | 5              | 2.3                   | 835    | 93004  | 6.4 | Isoform 2 of O43196                                                                                                                                     |
| 3296 | O43196           | 2                    | 5              | 2.3                   | 834    | 92875  | 6.4 | MutS protein homolog 5                                                                                                                                  |
| 3296 | Q9UMP2           | 2                    | 5              | 2.2                   | 851    | 94669  | 6.3 | G7 protein                                                                                                                                              |
| 3296 | O43196-3         | 2                    | 5              | 2.2                   | 851    | 94719  | 6.4 | Isoform 3 of O43196                                                                                                                                     |
| 3297 | Q14662           | 2                    | 3              | 4.2                   | 669    | 77129  | 4.7 | Binding protein                                                                                                                                         |
| 3297 | UPI000036684D    | 2                    | 3              | 4                     | 707    | 80707  | 4.7 | Amyloid-like protein 2 precursor (Amyloid protein homolog) (APPH) (CDEI box-binding protein) (CDEBP).                                                   |
| 3297 | Q13861           | 2                    | 3              | 4                     | 695    | 79238  | 4.7 | Binding protein                                                                                                                                         |
| 3297 | Q06481-2         | 2                    | 3              | 4                     | 707    | 80721  | 4.7 | Isoform 2 of Q06481                                                                                                                                     |
| 3297 | Q06481           | 2                    | 3              | 3.7                   | 763    | 86956  | 4.8 | Amyloid-like protein 2 precursor                                                                                                                        |
| 3297 | Q71U10           | 2                    | 3              | 3.7                   | 763    | 86942  | 4.8 | Amyloid protein homolog HSD-2                                                                                                                           |
| 3297 | Q06481-3         | 2                    | 3              | 3.7                   | 751    | 85487  | 4.8 | Isoform 3 of Q06481                                                                                                                                     |
| 3298 | Q49AT7           | 2                    | 2              | 6                     | 416    | 45414  | 6.7 | TGFBI protein                                                                                                                                           |
| 3298 | Q15582           | 2                    | 2              | 3.7                   | 683    | 74681  | 7.7 | Transforming growth factor-beta-induced protein ig-h3 precursor                                                                                         |
| 3298 | UPI000045734C    | 2                    | 2              | 3.7                   | 682    | 74591  | 7.3 | Transforming growth factor-beta-induced protein ig-h3 precursor (Beta ig-h3) (Kerato-epithelin) (RGD-containing collagen-associated protein) (RGD-CAP). |
| 3298 | Q53GU8           | 2                    | 2              | 3.7                   | 683    | 74651  | 7.7 | Transforming growth factor, beta-induced, 68kDa variant                                                                                                 |
| 3299 | Q53HB9           | 2                    | 4              | 3.7                   | 547    | 61566  | 9.3 | DEAD (Asp-Glu-Ala-Asp) box polypeptide 56 variant                                                                                                       |
| 3299 | Q9NY93           | 2                    | 4              | 3.7                   | 547    | 61590  | 9.3 | Probable ATP-dependent RNA helicase DDX56                                                                                                               |
| 3299 | Q6IAE2           | 2                    | 4              | 3.7                   | 547    | 61640  | 9.3 | DDX56 protein                                                                                                                                           |
| 3300 | Q66K25           | 2                    | 4              | 3.9                   | 664    | 72501  | 7.3 | SAMD4B protein                                                                                                                                          |
| 3300 | Q5PRF9           | 2                    | 4              | 3.7                   | 694    | 75483  | 6.8 | Sterile alpha motif domain-containing protein 4B                                                                                                        |
| 3301 | Q8IWZ8           | 2                    | 2              | 3.7                   | 645    | 72471  | 7.6 | Splicing factor 4                                                                                                                                       |
| 3302 | UPI0000456AAE    | 2                    | 2              | 3.9                   | 1166   | 126691 | 5.4 | Serine/threonine-protein kinase WNK4 (EC 2.7.11.1) (Protein kinase with no lysine 4) (Protein kinase, lysine-deficient 4).                              |
| 3302 | Q96J92-3         | 2                    | 2              | 3.9                   | 1165   | 126577 | 5.4 | Isoform 3 of Q96J92                                                                                                                                     |
| 3302 | Q96J92           | 2                    | 2              | 3.7                   | 1243   | 134739 | 5.5 | Serine/threonine-protein kinase WNK4                                                                                                                    |
| 3303 | Q13322-2         | 2                    | 5              | 3.8                   | 548    | 62026  | 7.1 | Isoform 1 of Q13322                                                                                                                                     |
| 3303 | A4D258           | 2                    | 5              | 3.6                   | 588    | 66487  | 8.2 | Growth factor receptor-bound protein 10                                                                                                                 |
| 3303 | Q13322           | 2                    | 5              | 3.5                   | 594    | 67231  | 7.9 | Growth factor receptor-bound protein 10                                                                                                                 |
| 3304 | O15269           | 2                    | 3              | 3.6                   | 473    | 52744  | 6   | Serine palmitoyltransferase 1                                                                                                                           |
| 3304 | Q6NUL7           | 2                    | 3              | 3.3                   | 513    | 57396  | 7.5 | SPTLC1 protein                                                                                                                                          |
| 3305 | P28288           | 2                    | 26             | 3.6                   | 659    | 75476  | 9.4 | ATP-binding cassette sub-family D member 3                                                                                                              |
| 3306 | Q08AF3           | 2                    | 6              | 3.6                   | 891    | 101055 | 8.2 | Schlafen family member 5                                                                                                                                |
| 3307 | Q5T8D9           | 2                    | 6              | 3.6                   | 716    | 79832  | 8.6 | YME1-like 1                                                                                                                                             |
| 3307 | Q96TA2           | 2                    | 6              | 3.4                   | 773    | 86455  | 8.8 | ATP-dependent metalloprotease YME1L1                                                                                                                    |
| 3308 | Q68CQ4           | 2                    | 2              | 3.6                   | 756    | 87055  | 5.9 | Digestive organ expansion factor homolog                                                                                                                |

| No.  | Accession Number | Unique Peptide Count | Spectrum Count | Sequence Coverage (%) | Length | MolWt  | pI  | Descriptive Name                                                                                                                                                                                                                                              |
|------|------------------|----------------------|----------------|-----------------------|--------|--------|-----|---------------------------------------------------------------------------------------------------------------------------------------------------------------------------------------------------------------------------------------------------------------|
| 3309 | Q9P134           | 2                    | 8              | 26.5                  | 68     | 7722   | 7.1 | PRO3078                                                                                                                                                                                                                                                       |
| 3309 | UPI0000F2443B    | 2                    | 8              | 6.8                   | 265    | 30483  | 5.4 | Proto-oncogene tyrosine-protein kinase LCK                                                                                                                                                                                                                    |
| 3309 | UPI0000F24456    | 2                    | 8              | 6.6                   | 273    | 31536  | 5.4 | Proto-oncogene tyrosine-protein kinase LCK                                                                                                                                                                                                                    |
| 3309 | UPI0000F2443A    | 2                    | 8              | 6.5                   | 277    | 32023  | 5.4 | Proto-oncogene tyrosine-protein kinase LCK                                                                                                                                                                                                                    |
| 3309 | UPI0000D614B3    | 2                    | 8              | 3.7                   | 489    | 55126  | 7   | Proto-oncogene tyrosine-protein kinase Fyn (EC 2.7.10.2) (p59-Fyn) (Protooncogene Syn) (SLK).                                                                                                                                                                 |
| 3309 | Q5R3A8           | 2                    | 8              | 3.7                   | 485    | 54669  | 7   | FYN oncogene related to SRC, FGR, YES                                                                                                                                                                                                                         |
| 3309 | P06241-3         | 2                    | 8              | 3.7                   | 482    | 54514  | 6.2 | Isoform 3 of P06241                                                                                                                                                                                                                                           |
| 3309 | P06239           | 2                    | 8              | 3.5                   | 509    | 58001  | 5.4 | Proto-oncogene tyrosine-protein kinase LCK                                                                                                                                                                                                                    |
| 3309 | UPI0000D61EBE    | 2                    | 8              | 3.5                   | 516    | 58303  | 5.8 | Proto-oncogene tyrosine-protein kinase LCK (EC 2.7.10.2) (p56-LCK) (Lymphocyte cell-specific protein-tyrosine kinase) (LSK) (T cell- specific protein-tyrosine kinase).                                                                                       |
| 3309 | Q573B4           | 2                    | 8              | 3.5                   | 516    | 58333  | 5.8 | Proto-oncogene tyrosine-protein kinase LCK                                                                                                                                                                                                                    |
| 3309 | P06241-2         | 2                    | 8              | 3.4                   | 534    | 60159  | 6.2 | Isoform 2 of P06241                                                                                                                                                                                                                                           |
| 3309 | P06241           | 2                    | 8              | 3.4                   | 537    | 60762  | 6.7 | Proto-oncogene tyrosine-protein kinase Fyn                                                                                                                                                                                                                    |
| 3309 | UPI0000456B50    | 2                    | 8              | 3.3                   | 543    | 60827  | 6.7 | Proto-oncogene tyrosine-protein kinase Yes (EC 2.7.10.2) (p61-Yes) (c- Yes).                                                                                                                                                                                  |
| 3309 | P07947           | 2                    | 8              | 3.3                   | 543    | 60801  | 6.7 | Proto-oncogene tyrosine-protein kinase Yes                                                                                                                                                                                                                    |
| 3309 | P06239-3         | 2                    | 8              | 3.3                   | 539    | 61190  | 5.2 | Isoform 3 of P06239                                                                                                                                                                                                                                           |
| 3310 | Q4JQC8           | 2                    | 2              | 3.8                   | 497    | 55149  | 9   | Glutamate transporter variant EAAT1ex9skip                                                                                                                                                                                                                    |
| 3310 | P43003           | 2                    | 2              | 3.5                   | 542    | 59572  | 8.4 | Excitatory amino acid transporter 1                                                                                                                                                                                                                           |
| 3310 | Q8N169           | 2                    | 2              | 3.5                   | 542    | 59503  | 8.2 | Solute carrier family 1 (Glial high affinity glutamate transporter), member 3                                                                                                                                                                                 |
| 3311 | Q6FHF7           | 2                    | 2              | 3.5                   | 567    | 65042  | 5.7 | RABGGTA protein                                                                                                                                                                                                                                               |
| 3311 | UPI00003669A8    | 2                    | 2              | 3.5                   | 570    | 65317  | 5.7 | Geranylgeranyl transferase type-2 alpha subunit (EC 2.5.1.60) (Geranylgeranyl transferase type II alpha subunit) (Rab geranylgeranyltransferase alpha subunit) (Rab geranyl- geranyltransferase alpha subunit) (Rab GG transferase alpha) (Rab GGTase alpha). |
| 3311 | Q92696           | 2                    | 2              | 3.5                   | 567    | 65072  | 5.7 | Geranylgeranyl transferase type-2 alpha subunit                                                                                                                                                                                                               |
| 3312 | Q8NDI4           | 2                    | 3              | 3.5                   | 657    | 75091  | 5.6 | 85 kDa nucleoporin                                                                                                                                                                                                                                            |
| 3312 | Q9H9U1           | 2                    | 3              | 3.5                   | 656    | 75003  | 5.6 | CDNA FLJ12549 fis, clone NT2RM4000689                                                                                                                                                                                                                         |
| 3313 | Q8WVC0           | 2                    | 2              | 3.5                   | 666    | 75404  | 4.5 | RNA polymerase-associated protein LEO1                                                                                                                                                                                                                        |
| 3314 | UPI0000D616BF    | 2                    | 3              | 4.5                   | 557    | 61741  | 5.5 | Retinoid X receptor-interacting protein 110 (Receptor-associated protein 80) (Nuclear zinc finger protein RAP80).                                                                                                                                             |
| 3314 | Q96RL1-2         | 2                    | 3              | 4.5                   | 553    | 61325  | 5.6 | Isoform 2 of Q96RL1                                                                                                                                                                                                                                           |
| 3314 | Q96RL1           | 2                    | 3              | 3.5                   | 719    | 79728  | 5.4 | Ubiquitin interaction motif-containing protein 1                                                                                                                                                                                                              |
| 3314 | UPI0000D616BD    | 2                    | 3              | 3.5                   | 721    | 79928  | 5.4 | Retinoid X receptor-interacting protein 110 (Receptor-associated protein 80) (Nuclear zinc finger protein RAP80).                                                                                                                                             |
| 3315 | A1KY36           | 2                    | 5              | 3.4                   | 745    | 73453  | 9.6 | Cell proliferation-inducing protein 41                                                                                                                                                                                                                        |
| 3315 | P27658           | 2                    | 5              | 3.4                   | 744    | 73364  | 9.6 | Collagen alpha-1(VIII) chain precursor                                                                                                                                                                                                                        |
| 3316 | Q43164-2         | 2                    | 2              | 3.5                   | 688    | 76119  | 4.4 | Isoform 2 of Q43164                                                                                                                                                                                                                                           |
| 3316 | Q43164           | 2                    | 2              | 3.4                   | 708    | 78242  | 4.4 | E3 ubiquitin-protein ligase Praja2                                                                                                                                                                                                                            |
| 3316 | UPI000013D192    | 2                    | 2              | 3.4                   | 708    | 78214  | 4.4 | praja 2, RING-H2 motif containing                                                                                                                                                                                                                             |
| 3316 | UPI0000070696    | 2                    | 2              | 3.4                   | 708    | 78242  | 4.4 | praja 2, RING-H2 motif containing                                                                                                                                                                                                                             |
| 3317 | UPI0000DD868E    | 2                    | 2              | 5.4                   | 388    | 42732  | 5.9 | PREDICTED: similar to N-acetylserotonin O-methyltransferase-like protein (ASMTL)                                                                                                                                                                              |
| 3317 | UPI00004577F8    | 2                    | 2              | 3.5                   | 605    | 67102  | 6.1 | N-acetylserotonin O-methyltransferase-like protein (ASMTL).                                                                                                                                                                                                   |
| 3317 | Q5JQ52           | 2                    | 2              | 3.5                   | 605    | 67193  | 6.1 | Acetylserotonin O-methyltransferase-like                                                                                                                                                                                                                      |
| 3317 | Q95671           | 2                    | 2              | 3.4                   | 621    | 68857  | 6.1 | N-acetylserotonin O-methyltransferase-like protein                                                                                                                                                                                                            |
| 3317 | UPI00004577F9    | 2                    | 2              | 3.3                   | 629    | 69791  | 6   | N-acetylserotonin O-methyltransferase-like protein (ASMTL).                                                                                                                                                                                                   |
| 3318 | Q0WX56           | 2                    | 2              | 3.4                   | 530    | 59557  | 8   | Deubiquitinating enzyme DUB2                                                                                                                                                                                                                                  |
| 3319 | Q15139           | 2                    | 2              | 3.4                   | 912    | 101888 | 6.7 | Serine/threonine-protein kinase D1                                                                                                                                                                                                                            |
| 3319 | UPI0000D623E9    | 2                    | 2              | 3.4                   | 914    | 101889 | 6.6 | Serine/threonine-protein kinase D1 (EC 2.7.11.13) (nPKC-D1) (Protein kinase D) (Protein kinase C mu type) (nPKC-mu).                                                                                                                                          |
| 3319 | UPI0000456761    | 2                    | 2              | 3.4                   | 912    | 101704 | 6.6 | protein kinase D1                                                                                                                                                                                                                                             |
| 3319 | Q1KKQ2           | 2                    | 2              | 3.4                   | 914    | 101848 | 6.6 | Protein kinase D1                                                                                                                                                                                                                                             |
| 3320 | UPI000015D94C    | 2                    | 2              | 3.7                   | 464    | 53306  | 7.2 | serum/glucocorticoid regulated kinase 3 isoform 2                                                                                                                                                                                                             |
| 3320 | Q53EW6           | 2                    | 2              | 3.4                   | 496    | 57048  | 6.9 | Serum/glucocorticoid regulated kinase-like isoform 1 variant                                                                                                                                                                                                  |
| 3320 | Q96BR1           | 2                    | 2              | 3.4                   | 496    | 57108  | 6.9 | Serine/threonine-protein kinase Sgk3                                                                                                                                                                                                                          |
| 3320 | Q5H9Q5           | 2                    | 2              | 3.4                   | 496    | 57094  | 6.8 | Hypothetical protein DKFZp781N0293                                                                                                                                                                                                                            |
| 3321 | Q5JPE5           | 2                    | 2              | 3.4                   | 738    | 83566  | 6.1 | Hypothetical protein DKFZp667L062                                                                                                                                                                                                                             |
| 3321 | Q99549           | 2                    | 2              | 2.9                   | 860    | 97182  | 6.1 | M-phase phosphoprotein 8                                                                                                                                                                                                                                      |
| 3322 | Q5MIZ7-3         | 2                    | 6              | 3.8                   | 764    | 87377  | 4.8 | Isoform 3 of Q5MIZ7                                                                                                                                                                                                                                           |
| 3322 | Q5MIZ7-2         | 2                    | 6              | 3.5                   | 817    | 93718  | 4.9 | Isoform 2 of Q5MIZ7                                                                                                                                                                                                                                           |
| 3322 | Q5MIZ7           | 2                    | 6              | 3.4                   | 849    | 97444  | 5   | SMEK homolog 2                                                                                                                                                                                                                                                |
| 3322 | UPI00001C1DBA    | 2                    | 6              | 3.4                   | 849    | 97458  | 5   | SMEK homolog 2.                                                                                                                                                                                                                                               |
| 3323 | Q8TAS8           | 2                    | 2              | 3.8                   | 558    | 62528  | 6.4 | Oxysterol binding protein-like 9                                                                                                                                                                                                                              |
| 3323 | Q8NB17           | 2                    | 2              | 3.7                   | 571    | 63892  | 6.3 | CDNA FLJ34384 fis, clone HCHON1000131, weakly similar to KES1 PROTEIN                                                                                                                                                                                         |
| 3323 | Q6IA67           | 2                    | 2              | 3.7                   | 571    | 63926  | 6.3 | Oxysterol-binding protein                                                                                                                                                                                                                                     |

| No.  | Accession Number | Unique Peptide Count | Spectrum Count | Sequence Coverage (%) | Length | MolWt  | pI  | Descriptive Name                                                                                                                                                                                                                                                       |
|------|------------------|----------------------|----------------|-----------------------|--------|--------|-----|------------------------------------------------------------------------------------------------------------------------------------------------------------------------------------------------------------------------------------------------------------------------|
| 3323 | Q5TFC0           | 2                    | 2              | 3.4                   | 626    | 70237  | 6.1 | Oxysterol-binding protein                                                                                                                                                                                                                                              |
| 3323 | Q96SK4           | 2                    | 2              | 3.4                   | 626    | 70265  | 6.1 | CDNA FLJ14801 fis, clone NT2RP4001389, weakly similar to KES1 PROTEIN                                                                                                                                                                                                  |
| 3323 | UPI000049DC8D    | 2                    | 2              | 3.3                   | 628    | 70465  | 6.1 | Oxysterol-binding protein-related protein 9 (OSBP-related protein 9) (ORP-9).                                                                                                                                                                                          |
| 3323 | UPI0000D61F19    | 2                    | 2              | 2.9                   | 721    | 81394  | 5.8 | Oxysterol-binding protein-related protein 9 (OSBP-related protein 9) (ORP-9).                                                                                                                                                                                          |
| 3323 | Q96SU4-2         | 2                    | 2              | 2.9                   | 723    | 81787  | 6.2 | Isoform 2 of Q96SU4                                                                                                                                                                                                                                                    |
| 3323 | Q96SU4           | 2                    | 2              | 2.9                   | 736    | 83185  | 6.2 | Oxysterol-binding protein-related protein 9                                                                                                                                                                                                                            |
| 3323 | Q86YQ3           | 2                    | 2              | 2.9                   | 719    | 81166  | 5.8 | Oxysterol-binding protein-like protein 9                                                                                                                                                                                                                               |
| 3323 | UPI0000D61F18    | 2                    | 2              | 2.8                   | 743    | 84013  | 6.5 | Oxysterol-binding protein-related protein 9 (OSBP-related protein 9) (ORP-9).                                                                                                                                                                                          |
| 3323 | UPI0000167BAD    | 2                    | 2              | 2.8                   | 746    | 84255  | 6.2 | oxysterol-binding protein-like protein 9 isoform f                                                                                                                                                                                                                     |
| 3323 | UPI000013E7D3    | 2                    | 2              | 2.8                   | 738    | 83412  | 6.2 | Oxysterol-binding protein-related protein 9 (OSBP-related protein 9) (ORP-9).                                                                                                                                                                                          |
| 3323 | Q5VSM6           | 2                    | 2              | 2.8                   | 752    | 84823  | 6.3 | Oxysterol-binding protein                                                                                                                                                                                                                                              |
| 3323 | Q5VSM3           | 2                    | 2              | 2.8                   | 741    | 83786  | 6.5 | Oxysterol-binding protein                                                                                                                                                                                                                                              |
| 3323 | UPI0000D61F17    | 2                    | 2              | 2.7                   | 766    | 86481  | 6.5 | Oxysterol-binding protein-related protein 9 (OSBP-related protein 9) (ORP-9).                                                                                                                                                                                          |
| 3324 | O95470           | 2                    | 2              | 3.3                   | 568    | 63524  | 9.2 | Sphingosine-1-phosphate lyase 1                                                                                                                                                                                                                                        |
| 3325 | O60518           | 2                    | 12             | 3.2                   | 1105   | 124713 | 5   | Ran-binding protein 6                                                                                                                                                                                                                                                  |
| 3326 | Q8WYA6-3         | 2                    | 2              | 5.8                   | 311    | 36103  | 6.7 | Isoform 3 of Q8WYA6                                                                                                                                                                                                                                                    |
| 3326 | Q8WYA6-2         | 2                    | 2              | 4.8                   | 376    | 43392  | 6.2 | Isoform 2 of Q8WYA6                                                                                                                                                                                                                                                    |
| 3326 | Q0VAM0           | 2                    | 2              | 3.2                   | 563    | 65145  | 5   | Catenin, beta like 1                                                                                                                                                                                                                                                   |
| 3326 | UPI0000D61088    | 2                    | 2              | 3.2                   | 568    | 65751  | 5   | Beta-catenin-like protein 1 (Nuclear-associated protein) (NAP) (Testis development protein NYD-SP19).                                                                                                                                                                  |
| 3326 | Q8WYA6           | 2                    | 2              | 3.2                   | 563    | 65173  | 5   | Beta-catenin-like protein 1                                                                                                                                                                                                                                            |
| 3327 | Q53HI2           | 2                    | 2              | 3.2                   | 622    | 69839  | 6.8 | DEAD-box protein abstract variant                                                                                                                                                                                                                                      |
| 3327 | Q9UJV9           | 2                    | 2              | 3.2                   | 622    | 69838  | 6.8 | Probable ATP-dependent RNA helicase DDX41                                                                                                                                                                                                                              |
| 3328 | Q86X55           | 2                    | 4              | 3.2                   | 585    | 63460  | 6.6 | Histone-arginine methyltransferase CARM1                                                                                                                                                                                                                               |
| 3328 | UPI000004B825    | 2                    | 4              | 3.1                   | 608    | 65854  | 6.7 | coactivator-associated arginine methyltransferase 1                                                                                                                                                                                                                    |
| 3329 | Q8IX11           | 2                    | 5              | 3.2                   | 618    | 68118  | 5.9 | Mitochondrial Rho GTPase 2                                                                                                                                                                                                                                             |
| 3330 | Q96PU4           | 2                    | 3              | 3.2                   | 802    | 89985  | 8.2 | E3 ubiquitin-protein ligase UHRF2                                                                                                                                                                                                                                      |
| 3331 | Q9ULH1           | 2                    | 5              | 3.2                   | 1129   | 125471 | 7.3 | 130 kDa phosphatidylinositol 4,5-bisphosphate-dependent ARF1 GTPase-activating protein                                                                                                                                                                                 |
| 3331 | UPI0000D62501    | 2                    | 5              | 3.2                   | 1132   | 125759 | 7.3 | 130 kDa phosphatidylinositol 4,5-bisphosphate-dependent ARF1 GTPase-activating protein (PIP2-dependent ARF1 GAP) (ADP-ribosylation factor-directed GTPase-activating protein 1) (ARF GTPase-activating protein 1) (Development and differentiation-enhancing factor 1) |
| 3331 | UPI0000351D6E    | 2                    | 5              | 3.2                   | 1129   | 125498 | 7.3 | development and differentiation enhancing factor 1                                                                                                                                                                                                                     |
| 3331 | Q9ULH1-2         | 2                    | 5              | 3.2                   | 1132   | 125870 | 7.5 | Isoform 1 of Q9ULH1                                                                                                                                                                                                                                                    |
| 3332 | Q86TN5           | 2                    | 4              | 3.3                   | 676    | 78276  | 7.8 | Similar to Origin recognition complex subunit 3                                                                                                                                                                                                                        |
| 3332 | A2A2T5           | 2                    | 4              | 3.1                   | 712    | 82325  | 7.6 | Origin recognition complex, subunit 3-like                                                                                                                                                                                                                             |
| 3332 | Q9UBD5           | 2                    | 4              | 3.1                   | 711    | 82254  | 7.6 | Origin recognition complex subunit 3                                                                                                                                                                                                                                   |
| 3332 | Q53GY6           | 2                    | 4              | 3.1                   | 711    | 82332  | 7.6 | Origin recognition complex, subunit 3 isoform 2 variant                                                                                                                                                                                                                |
| 3333 | Q3SYP6           | 2                    | 3              | 4.6                   | 482    | 53480  | 9   | PTCD1 protein                                                                                                                                                                                                                                                          |
| 3333 | Q75127           | 2                    | 3              | 3.1                   | 700    | 78856  | 8.6 | Pentatricopeptide repeat protein 1                                                                                                                                                                                                                                     |
| 3333 | Q3ZB84           | 2                    | 3              | 3.1                   | 700    | 78886  | 8.5 | Pentatricopeptide repeat domain 1                                                                                                                                                                                                                                      |
| 3334 | O95834           | 2                    | 3              | 3.1                   | 649    | 70679  | 6.3 | Echinoderm microtubule-associated protein-like 2                                                                                                                                                                                                                       |
| 3335 | P51116           | 2                    | 2              | 3.1                   | 673    | 74223  | 6.2 | Fragile X mental retardation syndrome-related protein 2                                                                                                                                                                                                                |
| 3335 | UPI000012ADF3    | 2                    | 2              | 3.1                   | 673    | 74128  | 6.1 | fragile X mental retardation syndrome related protein 2                                                                                                                                                                                                                |
| 3335 | Q86V09           | 2                    | 2              | 3.1                   | 673    | 74232  | 6.3 | Fragile X mental retardation, autosomal homolog 2                                                                                                                                                                                                                      |
| 3335 | UPI0000D622B8    | 2                    | 2              | 3                     | 698    | 77072  | 6.6 | Fragile X mental retardation syndrome-related protein 2.                                                                                                                                                                                                               |
| 3336 | Q8IX18-2         | 2                    | 3              | 3.3                   | 732    | 83320  | 8.7 | Isoform 2 of Q8IX18                                                                                                                                                                                                                                                    |
| 3336 | Q8IX18           | 2                    | 3              | 3.1                   | 779    | 88560  | 8.6 | Probable ATP-dependent RNA helicase DHX40                                                                                                                                                                                                                              |
| 3336 | UPI000006C189F   | 2                    | 3              | 3.1                   | 779    | 88385  | 8.8 | PREDICTED: similar to DEAH (Asp-Glu-Ala-His) box polypeptide 40 isoform 2                                                                                                                                                                                              |
| 3336 | UPI0000061E1D    | 2                    | 3              | 3.1                   | 779    | 88529  | 8.5 | DEAH (Asp-Glu-Ala-His) box polypeptide 40                                                                                                                                                                                                                              |
| 3337 | Q8IY81           | 2                    | 5              | 3.1                   | 847    | 96576  | 8.2 | Putative rRNA methyltransferase 3 (EC 2.1.1.-) (rRNA (uridine-2'-O-)-methyltransferase 3)                                                                                                                                                                              |
| 3337 | UPI000013C87B    | 2                    | 5              | 3.1                   | 847    | 96558  | 8.4 | Putative rRNA methyltransferase 3 (EC 2.1.1.-) (rRNA (uridine-2'-O-)-methyltransferase 3).                                                                                                                                                                             |
| 3338 | Q9Y613           | 2                    | 3              | 3.1                   | 1164   | 126551 | 6.4 | FH1/FH2 domain-containing protein 1                                                                                                                                                                                                                                    |
| 3339 | P49756           | 2                    | 11             | 3.2                   | 784    | 94122  | 6.2 | Probable RNA-binding protein 25                                                                                                                                                                                                                                        |
| 3339 | A0PJL9           | 2                    | 11             | 3                     | 839    | 99723  | 6.3 | RBM25 protein                                                                                                                                                                                                                                                          |
| 3339 | UPI0000373D58    | 2                    | 11             | 3                     | 843    | 100186 | 6.3 | RNA binding motif protein 25                                                                                                                                                                                                                                           |
| 3340 | UPI000006C06FA   | 2                    | 3              | 4.1                   | 512    | 56162  | 6.8 | PREDICTED: similar to lactotransferrin                                                                                                                                                                                                                                 |
| 3340 | P02788           | 2                    | 3              | 3                     | 710    | 78182  | 8.1 | Lactotransferrin precursor (EC 3.4.21.-) (Lactoferrin) (Talalactoferrin alpha) [Contains: Kaliocin-1; Lactoferroxin A; Lactoferroxin B; Lactoferroxin C]                                                                                                               |
| 3340 | Q5EK51           | 2                    | 3              | 3                     | 711    | 78322  | 8.2 | Lactoferrin                                                                                                                                                                                                                                                            |
| 3340 | Q5DSM0           | 2                    | 3              | 3                     | 711    | 78384  | 8.2 | Growth-inhibiting protein 12                                                                                                                                                                                                                                           |

| No.  | Accession Number | Unique Peptide Count | Spectrum Count | Sequence Coverage (%) | Length | MolWt  | pI  | Descriptive Name                                                                                     |
|------|------------------|----------------------|----------------|-----------------------|--------|--------|-----|------------------------------------------------------------------------------------------------------|
| 3340 | Q2TUVW9          | 2                    | 3              | 3                     | 709    | 77981  | 8.1 | Lactoferrin                                                                                          |
| 3341 | P27986           | 2                    | 2              | 3                     | 724    | 83598  | 6.2 | Phosphatidylinositol 3-kinase regulatory subunit alpha                                               |
| 3341 | P27986-4         | 2                    | 2              | 3                     | 732    | 84474  | 6.2 | Isoform 4 of P27986                                                                                  |
| 3342 | Q9H2G0           | 2                    | 2              | 3.1                   | 852    | 97968  | 5.2 | CTCL tumor antigen se37-2                                                                            |
| 3342 | Q5W7F7           | 2                    | 2              | 3.1                   | 852    | 97958  | 5.3 | Ubiquitin ligase E3A isoform 1                                                                       |
| 3342 | Q05086           | 2                    | 2              | 3                     | 875    | 100646 | 5.2 | Ubiquitin-protein ligase E3A                                                                         |
| 3342 | UPI0000161F3B    | 2                    | 2              | 3                     | 875    | 100688 | 5.2 | ubiquitin protein ligase E3A isoform 2                                                               |
| 3342 | UPI00001605CC    | 2                    | 2              | 3                     | 872    | 100102 | 5.2 | ubiquitin protein ligase E3A isoform 3                                                               |
| 3342 | Q9BUI6           | 2                    | 2              | 3                     | 872    | 100044 | 5.2 | Ubiquitin protein ligase E3A                                                                         |
| 3342 | Q05086-3         | 2                    | 2              | 3                     | 872    | 100060 | 5.2 | Isoform III of Q05086                                                                                |
| 3343 | Q5VU09           | 2                    | 2              | 3.1                   | 674    | 75671  | 6.8 | Adducin 3                                                                                            |
| 3343 | Q59EK1           | 2                    | 2              | 3                     | 698    | 78214  | 6.2 | Adducin 3 isoform a variant                                                                          |
| 3343 | Q9UEY8           | 2                    | 2              | 3                     | 706    | 79155  | 6.3 | Gamma-adducin                                                                                        |
| 3344 | Q5T447           | 2                    | 2              | 3                     | 861    | 97113  | 5.6 | Probable E3 ubiquitin-protein ligase HECTD3                                                          |
| 3345 | Q8TC07-2         | 2                    | 4              | 3.1                   | 674    | 77395  | 5.4 | Isoform 2 of Q8TC07                                                                                  |
| 3345 | Q8TC07           | 2                    | 4              | 3                     | 691    | 79491  | 5.7 | TBC1 domain family member 15                                                                         |
| 3346 | UPI000021D19B    | 2                    | 2              | 3                     | 739    | 78505  | 9.2 | G2 and S phase expressed protein 1 (B99 homolog).                                                    |
| 3347 | Q3B768           | 2                    | 5              | 4                     | 803    | 90317  | 6.4 | Hypothetical protein                                                                                 |
| 3347 | O43156           | 2                    | 5              | 2.9                   | 1089   | 122069 | 6   | Uncharacterized protein KIAA0406                                                                     |
| 3348 | Q08174           | 2                    | 2              | 2.9                   | 1026   | 111270 | 5   | Protocadherin-1 precursor                                                                            |
| 3348 | UPI000045735F    | 2                    | 2              | 2.9                   | 1031   | 111812 | 5   | Protocadherin-1 precursor (Protocadherin-42) (PC42) (Cadherin-like protein 1).                       |
| 3348 | Q08174-2         | 2                    | 2              | 2.9                   | 1030   | 111704 | 5   | Isoform 2 of Q08174                                                                                  |
| 3348 | Q8IUP2           | 2                    | 2              | 2.8                   | 1060   | 114743 | 5   | Protocadherin 1                                                                                      |
| 3348 | UPI000016158F    | 2                    | 2              | 2.4                   | 1237   | 133722 | 5.1 | protocadherin 1 isoform 2 precursor                                                                  |
| 3349 | Q13671-2         | 2                    | 3              | 3.2                   | 721    | 77500  | 7.2 | Isoform RIN1                                                                                         |
| 3349 | Q13671           | 2                    | 3              | 2.9                   | 783    | 84099  | 8   | Ras and Rab interactor 1                                                                             |
| 3350 | Q13823           | 2                    | 2              | 2.9                   | 731    | 83655  | 9.2 | Nucleolar GTP-binding protein 2                                                                      |
| 3351 | UPI000046FF02    | 2                    | 3              | 4.3                   | 484    | 53859  | 7.9 | transmembrane protein 141                                                                            |
| 3351 | UPI0000D61953    | 2                    | 3              | 4                     | 520    | 57379  | 8.3 | transmembrane protein 141                                                                            |
| 3351 | Q5T5R6           | 2                    | 3              | 4                     | 520    | 57397  | 8.3 | Chromosome 9 open reading frame 86                                                                   |
| 3351 | Q3YEC7           | 2                    | 3              | 2.9                   | 729    | 79549  | 5.2 | Putative GTP-binding protein Parf                                                                    |
| 3351 | Q3YEC7-2         | 2                    | 3              | 2.9                   | 730    | 79636  | 5.2 | Isoform 2 of Q3YEC7                                                                                  |
| 3352 | Q59EB3           | 2                    | 2              | 2.9                   | 712    | 79524  | 7   | Met proto-oncogene variant                                                                           |
| 3353 | Q9BUQ8           | 2                    | 3              | 2.9                   | 820    | 95647  | 9.6 | Probable ATP-dependent RNA helicase DDX23                                                            |
| 3353 | UPI0000073875    | 2                    | 3              | 2.9                   | 820    | 95583  | 9.6 | DEAD (Asp-Glu-Ala-Asp) box polypeptide 23                                                            |
| 3354 | Q9NV70-2         | 2                    | 3              | 3                     | 879    | 100283 | 6.6 | Isoform 2 of Q9NV70                                                                                  |
| 3354 | Q9NV70           | 2                    | 3              | 2.9                   | 894    | 101982 | 6.6 | Exocyst complex component 1                                                                          |
| 3355 | Q9UF55           | 2                    | 2              | 2.9                   | 990    | 115956 | 7.5 | WD repeat protein 52                                                                                 |
| 3356 | Q504Z1           | 2                    | 25             | 3.4                   | 1305   | 146870 | 6.1 | EIF4G3 protein                                                                                       |
| 3356 | O43432           | 2                    | 25             | 2.8                   | 1585   | 176651 | 5.4 | Eukaryotic translation initiation factor 4 gamma 3                                                   |
| 3356 | Q59GJ0           | 2                    | 25             | 2.5                   | 1780   | 195956 | 5.6 | Eukaryotic translation initiation factor 4 gamma, 3 variant                                          |
| 3357 | Q5H9P4           | 2                    | 3              | 2.8                   | 924    | 99824  | 6.3 | Hypothetical protein DKFZp686M19106                                                                  |
| 3357 | UPI0000D4BE3E    | 2                    | 3              | 2.2                   | 1170   | 128486 | 6.1 | ankyrin repeat and FYVE domain containing 1 isoform 1                                                |
| 3357 | UPI00004569F8    | 2                    | 3              | 2.2                   | 1168   | 128295 | 6.1 | Ankyrin repeat and FYVE domain-containing protein 1 (Ankyrin repeats hooked to a zinc finger motif). |
| 3357 | Q9P2R3           | 2                    | 3              | 2.2                   | 1169   | 128399 | 6.1 | Ankyrin repeat and FYVE domain-containing protein 1                                                  |
| 3358 | UPI00006C1A6E    | 2                    | 2              | 2.9                   | 661    | 75741  | 9.3 | PREDICTED: similar to zinc finger protein 528 isoform 4                                              |
| 3358 | Q76KX9           | 2                    | 2              | 2.9                   | 661    | 75792  | 9.3 | Kruppel-like zinc finger protein isoform 1                                                           |
| 3358 | Q76KX8           | 2                    | 2              | 2.8                   | 674    | 77167  | 9.3 | Zinc finger protein 534                                                                              |
| 3358 | UPI0000D61806    | 2                    | 2              | 2.8                   | 673    | 77037  | 9.3 | Kruppel-like zinc finger protein isoform 1                                                           |
| 3359 | Q8N8A2           | 2                    | 3              | 2.8                   | 944    | 102557 | 6.3 | Ankyrin repeat domain-containing protein 44                                                          |
| 3359 | UPI000049DF2F    | 2                    | 3              | 2.8                   | 919    | 99788  | 6.3 | Ankyrin repeat domain-containing protein 44.                                                         |
| 3359 | UPI0000073B9C    | 2                    | 3              | 2.8                   | 919    | 99819  | 6.4 | ankyrin repeat domain 44                                                                             |
| 3359 | Q8N8A2-4         | 2                    | 3              | 2.8                   | 919    | 99807  | 6.4 | Isoform 4 of Q8N8A2                                                                                  |
| 3360 | Q05CN5           | 2                    | 2              | 2.9                   | 441    | 49185  | 5.7 | Hypothetical protein                                                                                 |
| 3360 | A2VCS9           | 2                    | 2              | 2.7                   | 488    | 54695  | 5.6 | MAP9 protein                                                                                         |
| 3360 | Q49MG5           | 2                    | 2              | 2                     | 647    | 74234  | 7.8 | Microtubule-associated protein 9                                                                     |
| 3361 | UPI000013E40F    | 2                    | 6              | 3.2                   | 822    | 91113  | 7.2 | Sad1/unc-84 protein-like 1 (Unc-84 homolog A).                                                       |
| 3361 | O94901           | 2                    | 6              | 3.2                   | 812    | 90064  | 7.1 | Sad1/unc-84 protein-like 1                                                                           |
| 3361 | A4D2Q0           | 2                    | 6              | 2.7                   | 974    | 108455 | 8   | Unc-84 homolog A                                                                                     |
| 3362 | Q5T693           | 2                    | 3              | 3.2                   | 760    | 88198  | 6.2 | Adenosine monophosphate deaminase 2                                                                  |
| 3362 | Q5T695           | 2                    | 3              | 3                     | 798    | 92071  | 6.3 | Adenosine monophosphate deaminase 2                                                                  |
| 3362 | Q01433-4         | 2                    | 3              | 3                     | 804    | 92918  | 6.4 | Isoform Ex1B                                                                                         |
| 3362 | Q01433           | 2                    | 3              | 2.7                   | 879    | 100688 | 6.9 | AMP deaminase 2                                                                                      |
| 3362 | Q5T694           | 2                    | 3              | 2.7                   | 890    | 101853 | 7.1 | Adenosine monophosphate deaminase 2                                                                  |
| 3363 | Q59FC4           | 2                    | 2              | 3.5                   | 687    | 75961  | 6.5 | Presynaptic protein SAP97 variant                                                                    |
| 3363 | UPI0000D61BDD    | 2                    | 2              | 2.8                   | 853    | 95166  | 6   | Disks large homolog 1 (Synapse-associated protein 97) (SAP-97) (hDlg).                               |
| 3363 | Q12959-5         | 2                    | 2              | 2.8                   | 853    | 95066  | 6   | Isoform 5 of Q12959                                                                                  |
| 3363 | Q12959-3         | 2                    | 2              | 2.8                   | 871    | 96976  | 5.9 | Isoform 3 of Q12959                                                                                  |
| 3363 | Q12959           | 2                    | 2              | 2.7                   | 904    | 100355 | 5.7 | Disks large homolog 1                                                                                |

| No.  | Accession Number | Unique Peptide Count | Spectrum Count | Sequence Coverage (%) | Length | MolWt  | pI  | Descriptive Name                                                                                                                                                                                       |
|------|------------------|----------------------|----------------|-----------------------|--------|--------|-----|--------------------------------------------------------------------------------------------------------------------------------------------------------------------------------------------------------|
| 3363 | UPI0000D61BDC    | 2                    | 2              | 2.7                   | 890    | 98892  | 5.7 | Disks large homolog 1 (Synapse-associated protein 97) (SAP-97) (hDlg).                                                                                                                                 |
| 3363 | UPI00004DF217    | 2                    | 2              | 2.7                   | 893    | 99942  | 6   | Disks large homolog 1 (Synapse-associated protein 97) (SAP-97) (hDlg).                                                                                                                                 |
| 3363 | Q12959-6         | 2                    | 2              | 2.7                   | 891    | 98990  | 5.8 | Isoform 6 of Q12959                                                                                                                                                                                    |
| 3363 | Q12959-4         | 2                    | 2              | 2.7                   | 893    | 99842  | 6   | Isoform 4 of Q12959                                                                                                                                                                                    |
| 3363 | UPI0000D61BDB    | 2                    | 2              | 2.6                   | 916    | 101692 | 5.7 | Disks large homolog 1 (Synapse-associated protein 97) (SAP-97) (hDlg).                                                                                                                                 |
| 3363 | UPI000013CD24    | 2                    | 2              | 2.6                   | 926    | 103321 | 5.9 | Disks large homolog 1 (Synapse-associated protein 97) (SAP-97) (hDlg).                                                                                                                                 |
| 3363 | Q12959-7         | 2                    | 2              | 2.6                   | 917    | 101748 | 5.7 | Isoform 7 of Q12959                                                                                                                                                                                    |
| 3363 | Q12959-2         | 2                    | 2              | 2.6                   | 926    | 103221 | 5.9 | Isoform 2 of Q12959                                                                                                                                                                                    |
| 3364 | Q4V328-3         | 2                    | 2              | 3.9                   | 594    | 68188  | 5.5 | Isoform 3 of Q4V328                                                                                                                                                                                    |
| 3364 | UPI0000457834    | 2                    | 2              | 3.7                   | 624    | 71806  | 5.3 | GRIP1-associated protein 1 (GRASP-1).                                                                                                                                                                  |
| 3364 | Q4V328-2         | 2                    | 2              | 3.7                   | 625    | 71878  | 5.4 | Isoform 2 of Q4V328                                                                                                                                                                                    |
| 3364 | UPI0000D61D63    | 2                    | 2              | 2.9                   | 798    | 90999  | 5.1 | GRIP1-associated protein 1 (GRASP-1).                                                                                                                                                                  |
| 3364 | Q4V329           | 2                    | 2              | 2.9                   | 796    | 90841  | 5.1 | GRIP1 associated protein 1                                                                                                                                                                             |
| 3364 | UPI0000D61D62    | 2                    | 2              | 2.8                   | 811    | 92825  | 5.1 | GRIP1-associated protein 1 (GRASP-1).                                                                                                                                                                  |
| 3364 | Q4V328-4         | 2                    | 2              | 2.8                   | 810    | 92738  | 5.2 | Isoform 4 of Q4V328                                                                                                                                                                                    |
| 3364 | Q4V328           | 2                    | 2              | 2.7                   | 841    | 95989  | 5.1 | GRIP1-associated protein 1                                                                                                                                                                             |
| 3364 | UPI0000457833    | 2                    | 2              | 2.7                   | 842    | 96076  | 5.1 | GRIP1-associated protein 1 (GRASP-1).                                                                                                                                                                  |
| 3365 | Q7RTP6           | 2                    | 2              | 2.7                   | 976    | 109911 | 8.4 | Protein MICAL-3                                                                                                                                                                                        |
| 3365 | UPI0000DD85C8    | 2                    | 2              | 2.7                   | 963    | 108956 | 8.4 | PREDICTED: similar to Protein MICAL-3                                                                                                                                                                  |
| 3365 | Q7RTP6-2         | 2                    | 2              | 2.7                   | 948    | 106837 | 8.2 | Isoform 2 of Q7RTP6                                                                                                                                                                                    |
| 3366 | Q8N596           | 2                    | 2              | 2.7                   | 811    | 90794  | 6.8 | Oxysterol binding protein-like 5                                                                                                                                                                       |
| 3366 | UPI0000366761    | 2                    | 2              | 2.7                   | 821    | 91898  | 6.9 | Oxysterol-binding protein-related protein 5 (OSBP-related protein 5) (ORP-5).                                                                                                                          |
| 3366 | UPI00001AF3AD    | 2                    | 2              | 2.5                   | 889    | 99721  | 7.6 | Oxysterol-binding protein-related protein 5 (OSBP-related protein 5) (ORP-5).                                                                                                                          |
| 3366 | Q9H0X9           | 2                    | 2              | 2.5                   | 879    | 98617  | 7.5 | Oxysterol-binding protein-related protein 5                                                                                                                                                            |
| 3367 | Q99567           | 2                    | 3              | 2.7                   | 741    | 83542  | 5.7 | Nuclear pore complex protein Nup88                                                                                                                                                                     |
| 3368 | Q9NXH9-2         | 2                    | 3              | 2.9                   | 630    | 69306  | 7.2 | Isoform 2 of Q9NXH9                                                                                                                                                                                    |
| 3368 | Q9NXH9           | 2                    | 3              | 2.7                   | 659    | 72234  | 7.6 | N(2),N(2)-dimethylguanosine tRNA methyltransferase (EC 2.1.1.32) (tRNA(guanine-26,N(2)-N(2)) methyltransferase) (tRNA 2,2-dimethylguanosine-26 methyltransferase) (tRNA(m(2,2)G26)dimethyltransferase) |
| 3369 | Q9Y3E9           | 2                    | 2              | 5.2                   | 404    | 45005  | 8.5 | CGI-151 protein                                                                                                                                                                                        |
| 3369 | Q9Y2J6           | 2                    | 2              | 2.7                   | 772    | 83643  | 7.7 | KIAA0992 protein                                                                                                                                                                                       |
| 3370 | A1KY35           | 2                    | 6              | 2.6                   | 900    | 104190 | 6   | Cell proliferation-inducing protein 53                                                                                                                                                                 |
| 3370 | UPI00001C1F92    | 2                    | 6              | 2.6                   | 900    | 104217 | 6   | neural precursor cell expressed, developmentally down-regulated 4 isoform 1                                                                                                                            |
| 3370 | UPI000045685E    | 2                    | 6              | 2.3                   | 1000   | 114992 | 7   | E3 ubiquitin-protein ligase NEDD4 (EC 6.3.2.-).                                                                                                                                                        |
| 3370 | P46934           | 2                    | 6              | 2.3                   | 1000   | 114936 | 6.9 | E3 ubiquitin-protein ligase NEDD4                                                                                                                                                                      |
| 3370 | UPI00001418FE    | 2                    | 6              | 1.8                   | 1247   | 140696 | 6.6 | neural precursor cell expressed, developmentally down-regulated 4 isoform 2                                                                                                                            |
| 3371 | O60645-2         | 2                    | 3              | 3.1                   | 641    | 73797  | 7.1 | Isoform 2 of O60645                                                                                                                                                                                    |
| 3371 | O60645           | 2                    | 3              | 2.6                   | 756    | 86845  | 6.1 | Exocyst complex component 3                                                                                                                                                                            |
| 3372 | P20594-2         | 2                    | 3              | 2.7                   | 995    | 111208 | 6.8 | Isoform Short of P20594                                                                                                                                                                                |
| 3372 | P20594           | 2                    | 3              | 2.6                   | 1047   | 117022 | 6.9 | Atrial natriuretic peptide receptor B precursor                                                                                                                                                        |
| 3372 | P20594-3         | 2                    | 3              | 2.6                   | 1023   | 114113 | 7.1 | Isoform 3 of P20594                                                                                                                                                                                    |
| 3373 | UPI0000D62299    | 2                    | 3              | 6.3                   | 347    | 39626  | 6.5 | Active breakpoint cluster region-related protein.                                                                                                                                                      |
| 3373 | Q6ZT60           | 2                    | 3              | 6.1                   | 362    | 41155  | 6.7 | CDNA FLJ44934 fis, clone BRAMY3017920, highly similar to Active breakpoint cluster region-related protein                                                                                              |
| 3373 | Q12979-2         | 2                    | 3              | 2.7                   | 822    | 93707  | 6.4 | Isoform Short of Q12979                                                                                                                                                                                |
| 3373 | Q12979           | 2                    | 3              | 2.6                   | 859    | 97697  | 6.6 | Active breakpoint cluster region-related protein                                                                                                                                                       |
| 3373 | UPI00001AED3D    | 2                    | 3              | 2.6                   | 859    | 97598  | 6.6 | active breakpoint cluster region-related protein isoform a                                                                                                                                             |
| 3374 | Q14118           | 2                    | 3              | 2.6                   | 895    | 97581  | 8.6 | Dystroglycan precursor (Dystrophin-associated glycoprotein 1) [Contains: Alpha-dystroglycan (Alpha-DG); Beta-dystroglycan (Beta- DG)]                                                                  |
| 3374 | UPI000013EADAE   | 2                    | 3              | 2.6                   | 895    | 97441  | 8.6 | Dystroglycan precursor (Dystrophin-associated glycoprotein 1) [Contains: Alpha-dystroglycan (Alpha-DG); Beta-dystroglycan (Beta- DG)].                                                                 |
| 3374 | Q969J9           | 2                    | 3              | 2.6                   | 895    | 97541  | 8.6 | Dystroglycan 1                                                                                                                                                                                         |
| 3375 | UPI0000D61F63    | 2                    | 2              | 2.9                   | 543    | 63041  | 6.3 | Formin-binding protein 1-like (Transducer of Cdc42-dependent actin assembly protein 1) (Toca-1).                                                                                                       |
| 3375 | Q5T0N5-4         | 2                    | 2              | 2.9                   | 551    | 64033  | 6.2 | Isoform 4 of Q5T0N5                                                                                                                                                                                    |
| 3375 | Q5T0N5-3         | 2                    | 2              | 2.9                   | 547    | 63572  | 6.2 | Isoform 3 of Q5T0N5                                                                                                                                                                                    |
| 3375 | UPI0000D61F62    | 2                    | 2              | 2.7                   | 596    | 68903  | 6.6 | Formin-binding protein 1-like (Transducer of Cdc42-dependent actin assembly protein 1) (Toca-1).                                                                                                       |
| 3375 | Q5T0N5-2         | 2                    | 2              | 2.7                   | 600    | 69434  | 6.6 | Isoform 2 of Q5T0N5                                                                                                                                                                                    |
| 3375 | Q5T0N5           | 2                    | 2              | 2.6                   | 605    | 69977  | 6.6 | Formin-binding protein 1-like                                                                                                                                                                          |
| 3375 | Q5T0N5-5         | 2                    | 2              | 2.6                   | 604    | 69894  | 6.6 | Isoform 5 of Q5T0N5                                                                                                                                                                                    |
| 3376 | Q6NUQ2           | 2                    | 5              | 2.6                   | 1002   | 111640 | 4.9 | Calmin                                                                                                                                                                                                 |
| 3376 | Q96JQ2           | 2                    | 5              | 2.6                   | 1002   | 111651 | 4.9 | Calmin                                                                                                                                                                                                 |
| 3377 | Q6PD62           | 2                    | 3              | 2.6                   | 1173   | 133502 | 6.8 | RNA polymerase-associated protein CTR9 homolog                                                                                                                                                         |
| 3378 | O15037           | 2                    | 2              | 2.5                   | 678    | 74461  | 7   | Protein KIAA0323                                                                                                                                                                                       |

| No.  | Accession Number | Unique Peptide Count | Spectrum Count | Sequence Coverage (%) | Length | MolWt  | pI  | Descriptive Name                                                                    |
|------|------------------|----------------------|----------------|-----------------------|--------|--------|-----|-------------------------------------------------------------------------------------|
| 3378 | UPI000000CC1F    | 2                    | 2              | 2.5                   | 678    | 74534  | 7   | hypothetical protein LOC23351                                                       |
| 3379 | O94799           | 2                    | 3              | 2.5                   | 486    | 56526  | 4.4 | HRIHFB2216 protein                                                                  |
| 3379 | Q9BZW6           | 2                    | 3              | 1.9                   | 633    | 72788  | 4.6 | Differentially expressed nucleolar TGF-beta1 target protein                         |
| 3379 | UPI0000DD86A4    | 2                    | 3              | 1.7                   | 695    | 79700  | 4.6 | PREDICTED: similar to TSPY-like 2                                                   |
| 3379 | Q9H2G4           | 2                    | 3              | 1.7                   | 693    | 79435  | 4.6 | TSPY-like protein 2                                                                 |
| 3380 | P50416           | 2                    | 5              | 2.5                   | 773    | 88368  | 8.7 | Carnitine O-palmitoyltransferase I, liver isoform                                   |
| 3380 | P50416-2         | 2                    | 5              | 2.5                   | 756    | 86239  | 8.4 | Isoform 2 of P50416                                                                 |
| 3381 | Q1RLN5           | 2                    | 7              | 2.5                   | 799    | 90874  | 8.5 | ARHGAP12 protein                                                                    |
| 3381 | Q5T2Y2           | 2                    | 7              | 2.5                   | 816    | 93114  | 7.8 | Rho GTPase activating protein 12                                                    |
| 3381 | Q5T2Y0           | 2                    | 7              | 2.5                   | 794    | 90403  | 8.4 | Rho GTPase activating protein 12                                                    |
| 3381 | Q8IWWW6          | 2                    | 7              | 2.4                   | 846    | 96254  | 7.6 | Rho GTPase activating protein 12                                                    |
| 3381 | Q504X1           | 2                    | 7              | 2.4                   | 841    | 95784  | 7.4 | ARHGAP12 protein                                                                    |
| 3382 | Q8IVU2           | 2                    | 2              | 2.6                   | 705    | 76392  | 6.2 | ESPNL protein                                                                       |
| 3382 | Q6ZVG1           | 2                    | 2              | 2.5                   | 722    | 78412  | 6.1 | CDNA FLJ24621 fis, clone BRACE3015262                                               |
| 3382 | UPI000022BC90    | 2                    | 2              | 1.8                   | 1005   | 108132 | 6.5 | espin-like                                                                          |
| 3382 | Q6ZVH7           | 2                    | 2              | 1.8                   | 1005   | 108176 | 6.5 | Espin-like protein                                                                  |
| 3383 | Q86TI2-3         | 2                    | 3              | 3.3                   | 674    | 76702  | 6.5 | Isoform 3 of Q86TI2                                                                 |
| 3383 | UPI000043F349    | 2                    | 3              | 2.6                   | 850    | 96613  | 6.5 | dipeptidylpeptidase 9                                                               |
| 3383 | Q86TI2-4         | 2                    | 3              | 2.6                   | 836    | 95013  | 6.5 | Isoform 4 of Q86TI2                                                                 |
| 3383 | Q86TI2           | 2                    | 3              | 2.5                   | 863    | 98263  | 6.5 | Dipeptidyl peptidase 9                                                              |
| 3384 | Q8IVL5           | 2                    | 6              | 2.5                   | 708    | 80985  | 5.7 | Prolyl 3-hydroxylase 2 precursor                                                    |
| 3385 | P06400           | 2                    | 2              | 2.4                   | 928    | 106159 | 7.9 | Retinoblastoma-associated protein                                                   |
| 3385 | Q59HH0           | 2                    | 2              | 2.3                   | 960    | 109774 | 8.2 | Retinoblastoma-associated protein variant                                           |
| 3386 | Q13563           | 2                    | 4              | 2.4                   | 968    | 109691 | 5.7 | Polycystin-2                                                                        |
| 3387 | Q8TDD1           | 2                    | 3              | 2.4                   | 881    | 98595  | 10  | ATP-dependent RNA helicase DDX54                                                    |
| 3388 | Q9UPZ3           | 2                    | 2              | 2.4                   | 1129   | 127449 | 5.5 | Hermansky-Pudlak syndrome 5 protein                                                 |
| 3389 | P11498           | 2                    | 2              | 2.3                   | 1178   | 129634 | 6.8 | Pyruvate carboxylase, mitochondrial precursor                                       |
| 3390 | Q14527           | 2                    | 2              | 2.3                   | 1009   | 113928 | 8.6 | Helicase-like transcription factor                                                  |
| 3390 | Q59GQ7           | 2                    | 2              | 2.3                   | 992    | 111966 | 8.7 | SWI/SNF-related matrix-associated actin-dependent regulator of chromatin a3 variant |
| 3391 | Q9H9Z1           | 2                    | 2              | 10.6                  | 170    | 19571  | 9.3 | CDNA FLJ12462 fis, clone NT2RM1000770, weakly similar to DXS6673E PROTEIN           |
| 3391 | Q9NXG9           | 2                    | 2              | 4.3                   | 416    | 47549  | 6.1 | CDNA FLJ20259 fis, clone COLF7443                                                   |
| 3391 | Q2TAL8           | 2                    | 2              | 2.3                   | 776    | 86436  | 5.9 | Glutamine-rich protein 1                                                            |
| 3392 | Q7Z3G5           | 2                    | 2              | 2.4                   | 890    | 100704 | 6.3 | Hypothetical protein DKFZp686O12114                                                 |
| 3392 | Q5CZB1           | 2                    | 2              | 2.3                   | 910    | 102937 | 6.7 | Hypothetical protein DKFZp686A01247                                                 |
| 3392 | UPI0000D61553    | 2                    | 2              | 2.3                   | 910    | 103010 | 6.6 | UPI0000D61553 UniRef100 entry                                                       |
| 3392 | Q6PJ44           | 2                    | 2              | 2.3                   | 897    | 101434 | 6.3 | DKFZP686A01247 protein                                                              |
| 3392 | Q68E07           | 2                    | 2              | 2.3                   | 902    | 101990 | 6.1 | Hypothetical protein DKFZp686B2470                                                  |
| 3392 | Q5CZB6           | 2                    | 2              | 2                     | 1069   | 120484 | 6.7 | Hypothetical protein DKFZp686G18243                                                 |
| 3392 | UPI0000D61554    | 2                    | 2              | 1.9                   | 1083   | 121867 | 6.5 | UPI0000D61554 UniRef100 entry                                                       |
| 3392 | Q9UPQ0           | 2                    | 2              | 1.9                   | 1101   | 123942 | 7.1 | KIAA1102 protein                                                                    |
| 3392 | UPI00001C1E0E    | 2                    | 2              | 1.4                   | 1467   | 164438 | 6.4 | UPI00001C1E0E UniRef100 entry                                                       |
| 3393 | Q9H6M7           | 2                    | 7              | 3.5                   | 774    | 84408  | 7.6 | CDNA: FLJ22087 fis, clone HEP15918                                                  |
| 3393 | Q9H6B3           | 2                    | 7              | 3.5                   | 774    | 84378  | 7.6 | CDNA: FLJ22417 fis, clone HRC08579                                                  |
| 3393 | Q8TDM9           | 2                    | 7              | 2.7                   | 1013   | 110352 | 7.3 | Amplified in breast cancer 1                                                        |
| 3393 | Q6AI08           | 2                    | 7              | 2.3                   | 1181   | 128781 | 7   | Hypothetical protein DKFZp686D22141                                                 |
| 3393 | Q6MZX1           | 2                    | 7              | 2.3                   | 1181   | 128707 | 7.1 | Hypothetical protein DKFZp686B03209                                                 |
| 3394 | Q6P1N0           | 2                    | 2              | 2.3                   | 951    | 104062 | 8.1 | Coiled-coil and C2 domain-containing protein 1A                                     |
| 3394 | Q6P1N0-2         | 2                    | 2              | 2.3                   | 950    | 103934 | 8.1 | Isoform 2 of Q6P1N0                                                                 |
| 3395 | Q8IY37           | 2                    | 2              | 2.3                   | 1157   | 129545 | 8.1 | Probable ATP-dependent RNA helicase DHX37                                           |
| 3396 | Q96KP1           | 2                    | 3              | 2.3                   | 924    | 104066 | 6.9 | Exocyst complex component 2                                                         |
| 3396 | UPI00004573AB    | 2                    | 3              | 2.3                   | 925    | 104238 | 6.9 | Exocyst complex component 2 (Exocyst complex component Sec5).                       |
| 3397 | Q96QC0           | 2                    | 4              | 2.3                   | 940    | 99058  | 9.2 | Serine/threonine-protein phosphatase 1 regulatory subunit 10                        |
| 3398 | A0JLU5           | 2                    | 8              | 2.2                   | 552    | 63457  | 4.7 | Hypothetical protein                                                                |
| 3398 | Q05C10           | 2                    | 8              | 2                     | 595    | 68611  | 4.9 | Hypothetical protein                                                                |
| 3398 | Q9H501           | 2                    | 8              | 1.4                   | 851    | 98796  | 5.1 | ESF1 homolog                                                                        |
| 3399 | A1L3A9           | 2                    | 5              | 2.2                   | 1232   | 138540 | 5.3 | TBC1 domain family, member 9B                                                       |
| 3399 | UPI000034ECFF    | 2                    | 5              | 2.2                   | 1250   | 140525 | 5.3 | TBC1 domain family, member 9B (with GRAM domain) isoform a                          |
| 3399 | UPI000020CCFB    | 2                    | 5              | 2.2                   | 1233   | 138670 | 5.3 | TBC1 domain family, member 9B (with GRAM domain) isoform b                          |
| 3399 | UPI000013D22E    | 2                    | 5              | 2.1                   | 1261   | 141519 | 5.3 | TBC1 domain family, member 9B (with GRAM domain) isoform b                          |
| 3399 | Q75163           | 2                    | 5              | 2.1                   | 1262   | 141589 | 5.3 | TBC1 domain family member 9B                                                        |
| 3400 | Q59F15           | 2                    | 4              | 3.4                   | 847    | 82980  | 8.7 | COL4A1 protein variant                                                              |
| 3400 | A2A373           | 2                    | 4              | 2.2                   | 1318   | 127981 | 7.9 | Collagen type IV alpha 1                                                            |
| 3400 | UPI0000D61AA3    | 2                    | 4              | 1.7                   | 1670   | 160743 | 8.3 | Collagen alpha-1(IV) chain precursor.                                               |
| 3400 | UPI000004981D    | 2                    | 4              | 1.7                   | 1669   | 160611 | 8.3 | alpha 1 type IV collagen preproprotein                                              |
| 3400 | P02462           | 2                    | 4              | 1.7                   | 1669   | 160615 | 8.3 | Collagen alpha-1(IV) chain precursor                                                |
| 3401 | Q548W1           | 2                    | 2              | 2.5                   | 920    | 103012 | 6.9 | HRNT1                                                                               |
| 3401 | O15294           | 2                    | 2              | 2.2                   | 1046   | 116924 | 6.7 | UDP-N-acetylglucosamine--peptide N-acetylglucosaminyltransferase 110 kDa subunit    |
| 3401 | O15294-3         | 2                    | 2              | 2.2                   | 1036   | 115706 | 6.7 | Isoform 1 of O15294                                                                 |
| 3402 | Q02156           | 2                    | 2              | 2.2                   | 737    | 83674  | 7.1 | Protein kinase C epsilon type                                                       |
| 3403 | Q9Y3Z1           | 2                    | 3              | 3.4                   | 529    | 60751  | 7.3 | Hypothetical protein DKFZp564L2123                                                  |



| No.  | Accession Number | Unique Peptide Count | Spectrum Count | Sequence Coverage (%) | Length | MolWt  | pI  | Descriptive Name                                                                                                                                                               |
|------|------------------|----------------------|----------------|-----------------------|--------|--------|-----|--------------------------------------------------------------------------------------------------------------------------------------------------------------------------------|
| 3403 | Q3MJA4           | 2                    | 3              | 2.2                   | 831    | 94132  | 6.8 | Solute carrier family 39 (Zinc transporter), member 10                                                                                                                         |
| 3403 | Q9ULF5           | 2                    | 3              | 2.2                   | 835    | 94559  | 6.8 | Solute carrier family 39 member 10                                                                                                                                             |
| 3403 | Q68CR5           | 2                    | 3              | 2.2                   | 831    | 94120  | 6.8 | Hypothetical protein DKFZp781L10106                                                                                                                                            |
| 3404 | Q8TD19           | 2                    | 3              | 2.2                   | 979    | 107168 | 5.7 | Serine/threonine-protein kinase Nek9                                                                                                                                           |
| 3404 | UPI0000070F8F    | 2                    | 3              | 2.2                   | 979    | 107034 | 5.7 | NIMA related kinase 9                                                                                                                                                          |
| 3405 | UPI0000D61AD9    | 2                    | 2              | 2.2                   | 1053   | 112884 | 6.3 | Ankyrin repeat domain-containing protein 28.                                                                                                                                   |
| 3405 | UPI00004120FF    | 2                    | 2              | 2.2                   | 1053   | 112966 | 6.3 | ankyrin repeat domain 28                                                                                                                                                       |
| 3405 | O15084           | 2                    | 2              | 2.1                   | 1086   | 116543 | 6.2 | Ankyrin repeat domain-containing protein 28                                                                                                                                    |
| 3406 | Q13577           | 2                    | 2              | 2.3                   | 1149   | 126809 | 8.9 | 51C protein                                                                                                                                                                    |
| 3406 | O15357           | 2                    | 2              | 2.1                   | 1258   | 138585 | 6.5 | Inositol polyphosphate phosphatase-like protein 1                                                                                                                              |
| 3406 | UPI000013E4AF    | 2                    | 2              | 2.1                   | 1258   | 138599 | 6.5 | inositol polyphosphate phosphatase-like 1                                                                                                                                      |
| 3407 | O95155-3         | 2                    | 3              | 2.5                   | 1061   | 121820 | 6.2 | Isoform 3 of O95155                                                                                                                                                            |
| 3407 | UPI0000D61E44    | 2                    | 3              | 2.3                   | 1175   | 133468 | 6.2 | Ubiquitin conjugation factor E4 B (Ubiquitin fusion degradation protein 2) (Homozygously deleted in neuroblastoma 1).                                                          |
| 3407 | O95155-2         | 2                    | 3              | 2.3                   | 1173   | 133275 | 6.1 | Isoform 2 of O95155                                                                                                                                                            |
| 3407 | O95155           | 2                    | 3              | 2.1                   | 1302   | 146184 | 6.6 | Ubiquitin conjugation factor E4 B                                                                                                                                              |
| 3408 | Q2TAJ0           | 2                    | 2              | 4.3                   | 397    | 45229  | 9.2 | Cell division cycle 2-like 2                                                                                                                                                   |
| 3408 | Q9UQ88-10        | 2                    | 2              | 3.9                   | 439    | 49624  | 5.7 | Isoform 4 of Q9UQ88                                                                                                                                                            |
| 3408 | P21127-12        | 2                    | 2              | 3.9                   | 439    | 49555  | 5.8 | Isoform 7 of P21127                                                                                                                                                            |
| 3408 | Q96CA8           | 2                    | 2              | 3.7                   | 464    | 52406  | 5.1 | CDC2L2 protein                                                                                                                                                                 |
| 3408 | P21127-4         | 2                    | 2              | 3.7                   | 461    | 51925  | 5.2 | Isoform 3 of P21127                                                                                                                                                            |
| 3408 | Q6P5Y5           | 2                    | 2              | 3.6                   | 475    | 53688  | 4.8 | CDC2L1 protein                                                                                                                                                                 |
| 3408 | Q4VBY6           | 2                    | 2              | 3.6                   | 475    | 53757  | 4.8 | CDC2L2 protein                                                                                                                                                                 |
| 3408 | P21127-10        | 2                    | 2              | 3                     | 565    | 63937  | 4.7 | Isoform SV11 of P21127                                                                                                                                                         |
| 3408 | UPI0000DD7877    | 2                    | 2              | 2.9                   | 593    | 67740  | 4.9 | PREDICTED: similar to cell division cycle 2-like 1 (PITSLRE proteins) isoform 1                                                                                                |
| 3408 | UPI0000D61E1B    | 2                    | 2              | 2.3                   | 750    | 86357  | 5.3 | cell division cycle 2-like 1 (PITSLRE proteins) isoform 3                                                                                                                      |
| 3408 | UPI000006CC9E    | 2                    | 2              | 2.3                   | 737    | 85906  | 5.3 | cell division cycle 2-like 1 (PITSLRE proteins) isoform 4                                                                                                                      |
| 3408 | Q5QPR4           | 2                    | 2              | 2.3                   | 746    | 86824  | 5.3 | Cell division cycle 2-like 2                                                                                                                                                   |
| 3408 | P21127-9         | 2                    | 2              | 2.3                   | 748    | 87138  | 5.4 | Isoform SV10 of P21127                                                                                                                                                         |
| 3408 | P21127-6         | 2                    | 2              | 2.3                   | 738    | 86063  | 5.3 | Isoform SV5 of P21127                                                                                                                                                          |
| 3408 | UPI0000D61E1A    | 2                    | 2              | 2.2                   | 785    | 90626  | 5.2 | cell division cycle 2-like 1 (PITSLRE proteins) isoform 3                                                                                                                      |
| 3408 | UPI0000470904    | 2                    | 2              | 2.2                   | 770    | 90045  | 5.3 | PITSLRE serine/threonine-protein kinase CDC2L2 (EC 2.7.11.22) (Galactosyltransferase-associated protein kinase p58/GTA) (Cell division cycle 2-like protein kinase 2) (CDK11). |
| 3408 | UPI00003664B8    | 2                    | 2              | 2.2                   | 783    | 91362  | 5.4 | PITSLRE serine/threonine-protein kinase CDC2L2 (EC 2.7.11.22) (Galactosyltransferase-associated protein kinase p58/GTA) (Cell division cycle 2-like protein kinase 2) (CDK11). |
| 3408 | UPI000022B1E1    | 2                    | 2              | 2.2                   | 780    | 91018  | 5.4 | PITSLRE serine/threonine-protein kinase CDC2L2 (EC 2.7.11.22) (Galactosyltransferase-associated protein kinase p58/GTA) (Cell division cycle 2-like protein kinase 2) (CDK11). |
| 3408 | UPI0000163C11    | 2                    | 2              | 2.2                   | 777    | 90663  | 5.5 | cell division cycle 2-like 2 isoform 1                                                                                                                                         |
| 3408 | UPI00001613C8    | 2                    | 2              | 2.2                   | 775    | 90394  | 5.4 | cell division cycle 2-like 2 isoform 9                                                                                                                                         |
| 3408 | UPI0000160F88    | 2                    | 2              | 2.2                   | 771    | 90047  | 5.4 | cell division cycle 2-like 1 (PITSLRE proteins) isoform 9                                                                                                                      |
| 3408 | UPI0000160F86    | 2                    | 2              | 2.2                   | 780    | 91009  | 5.4 | cell division cycle 2-like 1 (PITSLRE proteins) isoform 8                                                                                                                      |
| 3408 | UPI0000072148    | 2                    | 2              | 2.2                   | 776    | 90698  | 5.4 | cell division cycle 2-like 2 isoform 3                                                                                                                                         |
| 3408 | UPI0000071930    | 2                    | 2              | 2.2                   | 767    | 89688  | 5.4 | cell division cycle 2-like 2 isoform 4                                                                                                                                         |
| 3408 | UPI000006F867    | 2                    | 2              | 2.2                   | 777    | 90661  | 5.5 | cell division cycle 2-like 2 isoform 1                                                                                                                                         |
| 3408 | UPI000006EE37    | 2                    | 2              | 2.2                   | 780    | 91063  | 5.4 | cell division cycle 2-like 2 isoform 5                                                                                                                                         |
| 3408 | Q9UQ88-4         | 2                    | 2              | 2.2                   | 767    | 89658  | 5.4 | Isoform SV3 of Q9UQ88                                                                                                                                                          |
| 3408 | Q9UQ88-3         | 2                    | 2              | 2.2                   | 776    | 90668  | 5.4 | Isoform SV2 of Q9UQ88                                                                                                                                                          |
| 3408 | Q9UQ88-2         | 2                    | 2              | 2.2                   | 777    | 90631  | 5.5 | Isoform SV1 of Q9UQ88                                                                                                                                                          |
| 3408 | Q9UQ88           | 2                    | 2              | 2.2                   | 780    | 90974  | 5.4 | PITSLRE serine/threonine-protein kinase CDC2L2                                                                                                                                 |
| 3408 | Q5QPR3           | 2                    | 2              | 2.2                   | 779    | 91007  | 5.3 | Cell division cycle 2-like 2                                                                                                                                                   |
| 3408 | P21127-8         | 2                    | 2              | 2.2                   | 772    | 90256  | 5.4 | Isoform 8 of P21127                                                                                                                                                            |
| 3408 | P21127-3         | 2                    | 2              | 2.2                   | 781    | 91219  | 5.4 | Isoform 2 of P21127                                                                                                                                                            |
| 3408 | P21127-2         | 2                    | 2              | 2.2                   | 782    | 91332  | 5.5 | Isoform SV1 of P21127                                                                                                                                                          |
| 3408 | P21127           | 2                    | 2              | 2.1                   | 795    | 92707  | 5.6 | PITSLRE serine/threonine-protein kinase CDC2L1                                                                                                                                 |
| 3408 | UPI0000D61E19    | 2                    | 2              | 2.1                   | 797    | 91867  | 5.4 | cell division cycle 2-like 1 (PITSLRE proteins) isoform 3                                                                                                                      |
| 3409 | UPI0000DD7E29    | 2                    | 2              | 2.5                   | 746    | 83454  | 8.1 | PREDICTED: hypothetical protein                                                                                                                                                |
| 3409 | Q75KM8           | 2                    | 2              | 2.1                   | 919    | 101892 | 6.5 | Hypothetical protein KIAA0738                                                                                                                                                  |
| 3409 | Q75KM9           | 2                    | 2              | 2.1                   | 921    | 102126 | 6.5 | Hypothetical protein KIAA0738                                                                                                                                                  |
| 3409 | Q9Y4C2           | 2                    | 2              | 2                     | 941    | 104377 | 6.4 | KIAA0738 protein                                                                                                                                                               |
| 3410 | Q8NAP3           | 2                    | 3              | 2.1                   | 1195   | 134257 | 8   | Zinc finger and BTB domain-containing protein 38                                                                                                                               |
| 3411 | UPI0000457488    | 2                    | 7              | 2.2                   | 981    | 108579 | 6.5 | NEDD9-interacting protein with calponin homology and LIM domains (Molecule interacting with CasL protein 1).                                                                   |
| 3411 | Q8TDZ2-2         | 2                    | 7              | 2.2                   | 981    | 108552 | 6.5 | Isoform 2 of Q8TDZ2                                                                                                                                                            |

| No.  | Accession Number | Unique Peptide Count | Spectrum Count | Sequence Coverage (%) | Length | MolWt  | pI  | Descriptive Name                                                                                                                       |
|------|------------------|----------------------|----------------|-----------------------|--------|--------|-----|----------------------------------------------------------------------------------------------------------------------------------------|
| 3411 | Q8TDZ2           | 2                    | 7              | 2.1                   | 1067   | 117875 | 6.4 | NEDD9-interacting protein with calponin homology and LIM domains                                                                       |
| 3411 | UPI0000457487    | 2                    | 7              | 2.1                   | 1067   | 117902 | 6.4 | NEDD9-interacting protein with calponin homology and LIM domains (Molecule interacting with CasL protein 1).                           |
| 3411 | UPI000012F0E5    | 2                    | 7              | 2.1                   | 1067   | 117932 | 6.5 | microtubule associated monooxygenase, calponin and LIM domain containing 1                                                             |
| 3412 | UPI000045678E    | 2                    | 2              | 2.6                   | 884    | 100957 | 7.7 | Disheveled-associated activator of morphogenesis 1.                                                                                    |
| 3412 | Q9Y4D1-3         | 2                    | 2              | 2.6                   | 882    | 100745 | 7.7 | Isoform 3 of Q9Y4D1                                                                                                                    |
| 3412 | Q9Y4D1-2         | 2                    | 2              | 2.2                   | 1068   | 122306 | 7.2 | Isoform 2 of Q9Y4D1                                                                                                                    |
| 3412 | Q9Y4D1           | 2                    | 2              | 2.1                   | 1078   | 123473 | 7.2 | Disheveled-associated activator of morphogenesis 1                                                                                     |
| 3413 | A4D228           | 2                    | 2              | 2                     | 1156   | 132195 | 6.8 | More than blood homolog                                                                                                                |
| 3413 | Q86X12           | 2                    | 2              | 2                     | 1143   | 130960 | 6.9 | Condensin-II complex subunit G2                                                                                                        |
| 3414 | P35251           | 2                    | 6              | 2                     | 1148   | 128254 | 9.4 | Replication factor C subunit 1                                                                                                         |
| 3414 | P35251-2         | 2                    | 6              | 2                     | 1147   | 128183 | 9.4 | Isoform 2 of P35251                                                                                                                    |
| 3415 | UPI0000D6164B    | 2                    | 2              | 3                     | 1077   | 123611 | 6.7 | Ras GTPase-activating-like protein IQGAP2.                                                                                             |
| 3415 | Q13576-2         | 2                    | 2              | 3                     | 1071   | 122840 | 6.7 | Isoform 2 of Q13576                                                                                                                    |
| 3415 | Q59HA3           | 2                    | 2              | 2.8                   | 1155   | 132687 | 5.9 | IQ motif containing GTPase activating protein 2 variant                                                                                |
| 3415 | Q13576           | 2                    | 2              | 2                     | 1575   | 180612 | 5.6 | Ras GTPase-activating-like protein IQGAP2                                                                                              |
| 3415 | UPI0000E56ECC    | 2                    | 2              | 2                     | 1575   | 180578 | 5.6 | IQ motif containing GTPase activating protein 2                                                                                        |
| 3415 | UPI000020CB2C    | 2                    | 2              | 2                     | 1575   | 180577 | 5.6 | Ras GTPase-activating-like protein IQGAP2.                                                                                             |
| 3416 | Q587J1           | 2                    | 2              | 2                     | 1336   | 145891 | 9.2 | Hypothetical protein FLJ11294                                                                                                          |
| 3416 | Q9C0J8           | 2                    | 2              | 2                     | 1336   | 145921 | 9.2 | WD repeat protein 33                                                                                                                   |
| 3417 | Q69YQ0           | 2                    | 2              | 2                     | 1117   | 124592 | 5.8 | Cytospin-A                                                                                                                             |
| 3417 | UPI00001B64E9    | 2                    | 2              | 2                     | 1117   | 124602 | 5.7 | Cytospin-A (SPEC11-like protein) (Renal carcinoma antigen NY-REN-22).                                                                  |
| 3418 | Q86V48           | 2                    | 2              | 2                     | 1076   | 120275 | 8.5 | Leucine zipper protein 1                                                                                                               |
| 3418 | UPI0000445E0E    | 2                    | 2              | 2                     | 1076   | 120304 | 8.6 | leucine zipper protein 1                                                                                                               |
| 3418 | Q86V48-3         | 2                    | 2              | 2                     | 1053   | 117555 | 8.9 | Isoform 3 of Q86V48                                                                                                                    |
| 3418 | Q86V48-2         | 2                    | 2              | 2                     | 1026   | 114588 | 8.9 | Isoform 2 of Q86V48                                                                                                                    |
| 3419 | Q86W91           | 2                    | 3              | 2                     | 1149   | 127382 | 8.9 | Plakophilin 4                                                                                                                          |
| 3420 | Q9H7F0           | 2                    | 5              | 2                     | 1130   | 127139 | 6.5 | Probable cation-transporting ATPase 13A3                                                                                               |
| 3420 | UPI00006C0765    | 2                    | 5              | 1.8                   | 1256   | 141717 | 6.7 | PREDICTED: similar to Probable cation-transporting ATPase 13A3 (ATPase family homolog up-regulated in senescence cells 1) isoform 3    |
| 3421 | Q6DHZ8           | 2                    | 5              | 1.9                   | 1102   | 123447 | 7.4 | Activity-dependent neuroprotector                                                                                                      |
| 3421 | Q9H2P0           | 2                    | 5              | 1.9                   | 1102   | 123563 | 7.3 | Activity-dependent neuroprotector                                                                                                      |
| 3422 | Q7LBC6           | 2                    | 5              | 1.9                   | 1761   | 191610 | 7.2 | JmjC domain-containing histone demethylation protein 2B                                                                                |
| 3422 | UPI000020C6A8    | 2                    | 5              | 1.9                   | 1761   | 191580 | 7.2 | JmjC domain-containing histone demethylation protein 2B (EC 1.14.11.-) (Jumonji domain-containing protein 1B) (Nuclear protein 5qNCA). |
| 3423 | Q8TEQ8           | 2                    | 2              | 1.9                   | 1089   | 118699 | 8.1 | GPI ethanolamine phosphate transferase 3                                                                                               |
| 3424 | Q9UM54           | 2                    | 7              | 1.9                   | 1294   | 149691 | 8.5 | Myosin-VI                                                                                                                              |
| 3424 | UPI000020D228    | 2                    | 7              | 1.9                   | 1253   | 145015 | 8.6 | Myosin-6 (Myosin VI) (Unconventional myosin VI).                                                                                       |
| 3424 | Q9UM54-5         | 2                    | 7              | 1.9                   | 1253   | 145041 | 8.6 | Isoform 5 of Q9UM54                                                                                                                    |
| 3424 | Q9UM54-4         | 2                    | 7              | 1.9                   | 1285   | 148684 | 8.6 | Isoform 4 of Q9UM54                                                                                                                    |
| 3424 | Q9UM54-2         | 2                    | 7              | 1.9                   | 1262   | 146047 | 8.5 | Isoform 2 of Q9UM54                                                                                                                    |
| 3424 | Q9UM54-1         | 2                    | 7              | 1.9                   | 1285   | 148713 | 8.5 | Isoform 1 of Q9UM54                                                                                                                    |
| 3425 | Q9UQL6           | 2                    | 2              | 1.9                   | 1122   | 121992 | 6.2 | Histone deacetylase 5                                                                                                                  |
| 3425 | UPI0000508BBA    | 2                    | 2              | 1.9                   | 1123   | 122049 | 6.2 | histone deacetylase 5 isoform 3                                                                                                        |
| 3425 | UPI0000201355    | 2                    | 2              | 1.9                   | 1122   | 121978 | 6.2 | histone deacetylase 5 isoform 1                                                                                                        |
| 3426 | A3KN83           | 2                    | 2              | 1.8                   | 1393   | 154312 | 7.9 | Strawberry notch homolog 1                                                                                                             |
| 3426 | UPI00001AE90E    | 2                    | 2              | 1.8                   | 1392   | 154183 | 7.9 | sno, strawberry notch homolog 1                                                                                                        |
| 3426 | Q9H3T8           | 2                    | 2              | 1.8                   | 1392   | 154156 | 7.9 | Strawberry notch homolog 1                                                                                                             |
| 3427 | UPI00001413ED    | 2                    | 4              | 2                     | 1163   | 132464 | 6.5 | Apoptotic protease-activating factor 1 (Apaf-1).                                                                                       |
| 3427 | O14727-5         | 2                    | 4              | 2                     | 1171   | 133355 | 6.5 | Isoform 5 of O14727                                                                                                                    |
| 3427 | O14727-4         | 2                    | 4              | 1.9                   | 1205   | 137075 | 6.4 | Isoform 4 of O14727                                                                                                                    |
| 3427 | O14727-3         | 2                    | 4              | 1.9                   | 1194   | 135980 | 6.4 | Isoform 3 of O14727                                                                                                                    |
| 3427 | O14727-2         | 2                    | 4              | 1.9                   | 1237   | 140744 | 6.4 | Isoform 2 of O14727                                                                                                                    |
| 3427 | O14727           | 2                    | 4              | 1.8                   | 1248   | 141840 | 6.4 | Apoptotic protease-activating factor 1                                                                                                 |
| 3428 | O15013-3         | 2                    | 4              | 3.9                   | 610    | 68223  | 4.7 | Isoform 3 of O15013                                                                                                                    |
| 3428 | O15013-2         | 2                    | 4              | 3.6                   | 661    | 75449  | 6.9 | Isoform 2 of O15013                                                                                                                    |
| 3428 | O15013           | 2                    | 4              | 1.8                   | 1369   | 151611 | 5.7 | Rho guanine nucleotide exchange factor 10                                                                                              |
| 3428 | UPI0000D6247C    | 2                    | 4              | 1.8                   | 1315   | 145585 | 5.7 | Rho guanine nucleotide exchange factor 10.                                                                                             |
| 3428 | UPI00005054FE    | 2                    | 4              | 1.8                   | 1344   | 148869 | 5.6 | Rho guanine nucleotide exchange factor 10                                                                                              |
| 3428 | Q2KHR8           | 2                    | 4              | 1.8                   | 1306   | 144303 | 5.4 | ARHGEF10 protein                                                                                                                       |
| 3428 | O15013-4         | 2                    | 4              | 1.8                   | 1340   | 148328 | 5.8 | Isoform 4 of O15013                                                                                                                    |
| 3429 | O94854           | 2                    | 2              | 1.8                   | 1174   | 122340 | 4.2 | KIAA0754 protein                                                                                                                       |
| 3430 | O94885           | 2                    | 4              | 1.8                   | 1247   | 136653 | 6.1 | SAM and SH3 domain-containing protein 1                                                                                                |
| 3430 | Q6P4R9           | 2                    | 4              | 1.8                   | 1228   | 134825 | 6.4 | SASH1 protein                                                                                                                          |
| 3431 | Q14185           | 2                    | 2              | 1.8                   | 1865   | 215374 | 7.6 | Dedicator of cytokinesis protein 1                                                                                                     |
| 3431 | Q5VXF6           | 2                    | 2              | 1.8                   | 1865   | 215344 | 7.6 | Dedicator of cytokinesis 1                                                                                                             |
| 3432 | Q6UWR4           | 2                    | 2              | 5.5                   | 363    | 38825  | 9.6 | UBAP2                                                                                                                                  |
| 3432 | UPI0000457732    | 2                    | 2              | 1.9                   | 1066   | 111703 | 7.5 | Ubiquitin-associated protein 2.                                                                                                        |
| 3432 | Q5T6F2           | 2                    | 2              | 1.8                   | 1119   | 117115 | 7.3 | Ubiquitin-associated protein 2                                                                                                         |

| No.  | Accession Number | Unique Peptide Count | Spectrum Count | Sequence Coverage (%) | Length | MolWt  | pI  | Descriptive Name                                                                                                                                 |
|------|------------------|----------------------|----------------|-----------------------|--------|--------|-----|--------------------------------------------------------------------------------------------------------------------------------------------------|
| 3432 | UPI0000457731    | 2                    | 2              | 1.8                   | 1119   | 117130 | 7.3 | Ubiquitin-associated protein 2.                                                                                                                  |
| 3433 | Q86WZ4           | 2                    | 5              | 1.8                   | 899    | 100842 | 7.2 | WDFY4 protein                                                                                                                                    |
| 3433 | Q9HCG5           | 2                    | 5              | 1.3                   | 1270   | 143019 | 6.9 | KIAA1607 protein                                                                                                                                 |
| 3433 | UPI000045639A    | 2                    | 5              | 0.8                   | 1887   | 210629 | 6.8 | Uncharacterized protein C10orf64.                                                                                                                |
| 3433 | Q8TEN7           | 2                    | 5              | 0.8                   | 1887   | 210611 | 6.8 | WD repeat and FYVE domain-containing protein 4                                                                                                   |
| 3434 | Q9UMZ2-4         | 2                    | 2              | 2                     | 1224   | 131222 | 5.1 | Isoform 3 of Q9UMZ2                                                                                                                              |
| 3434 | Q9UMZ2-3         | 2                    | 2              | 1.9                   | 1236   | 132653 | 5.1 | Isoform 2 of Q9UMZ2                                                                                                                              |
| 3434 | Q9UMZ2           | 2                    | 2              | 1.8                   | 1314   | 140654 | 5   | AP1 subunit gamma-binding protein 1                                                                                                              |
| 3434 | UPI0000225CBB    | 2                    | 2              | 1.8                   | 1302   | 139222 | 5   | AP1 gamma subunit binding protein 1 isoform 2                                                                                                    |
| 3435 | A0JP11           | 2                    | 2              | 1.7                   | 1358   | 153158 | 7.2 | Phosphoinositide-3-kinase, regulatory subunit 4, p150                                                                                            |
| 3435 | Q99570           | 2                    | 2              | 1.7                   | 1358   | 153103 | 7.2 | Phosphoinositide 3-kinase regulatory subunit 4                                                                                                   |
| 3436 | A0JP15           | 2                    | 2              | 1.7                   | 1381   | 154958 | 7   | KIAA1012 protein                                                                                                                                 |
| 3436 | UPI0000D60ECC    | 2                    | 2              | 1.7                   | 1359   | 152868 | 6.8 | Protein TRS85 homolog.                                                                                                                           |
| 3436 | Q9Y2L5-2         | 2                    | 2              | 1.7                   | 1359   | 152973 | 6.8 | Isoform 2 of Q9Y2L5                                                                                                                              |
| 3436 | UPI000034ECB4    | 2                    | 2              | 1.6                   | 1435   | 160970 | 6.9 | hypothetical protein LOC22878                                                                                                                    |
| 3436 | UPI0000052E22    | 2                    | 2              | 1.6                   | 1435   | 160996 | 6.9 | Protein TRS85 homolog.                                                                                                                           |
| 3436 | Q9Y2L5           | 2                    | 2              | 1.6                   | 1435   | 160940 | 6.9 | Protein TRS85 homolog                                                                                                                            |
| 3437 | A1L4N8           | 2                    | 2              | 1.7                   | 1265   | 140469 | 5.6 | 5-methyltetrahydrofolate-homocysteine methyltransferase                                                                                          |
| 3437 | UPI0000D620E0    | 2                    | 2              | 1.7                   | 1267   | 140685 | 5.6 | Methionine synthase (EC 2.1.1.13) (5-methyltetrahydrofolate-- homocysteine methyltransferase) (Methionine synthase, vitamin-B12 dependent) (MS). |
| 3437 | UPI0000036BC3    | 2                    | 2              | 1.7                   | 1265   | 140587 | 5.6 | 5-methyltetrahydrofolate-homocysteine methyltransferase                                                                                          |
| 3437 | Q99707           | 2                    | 2              | 1.7                   | 1265   | 140527 | 5.6 | Methionine synthase                                                                                                                              |
| 3438 | Q86XZ1           | 2                    | 2              | 2.6                   | 1102   | 125730 | 6.7 | JARID1A protein                                                                                                                                  |
| 3438 | UPI00001FBD40    | 2                    | 2              | 1.8                   | 1641   | 186837 | 6.8 | retinoblastoma binding protein 2 isoform 2                                                                                                       |
| 3438 | P29375           | 2                    | 2              | 1.7                   | 1722   | 195815 | 6.8 | Jumonji/ARID domain-containing protein 1A                                                                                                        |
| 3438 | UPI0000D62185    | 2                    | 2              | 1.7                   | 1722   | 195723 | 6.8 | Jumonji/ARID domain-containing protein 1A (Retinoblastoma-binding protein 2) (RBBP-2).                                                           |
| 3438 | UPI0000D62184    | 2                    | 2              | 1.7                   | 1730   | 196284 | 6.5 | Jumonji/ARID domain-containing protein 1A (Retinoblastoma-binding protein 2) (RBBP-2).                                                           |
| 3438 | Q4LE72           | 2                    | 2              | 1.7                   | 1731   | 196355 | 6.5 | JARID1A variant protein                                                                                                                          |
| 3439 | P78559           | 2                    | 2              | 1.7                   | 2805   | 306530 | 4.9 | Microtubule-associated protein 1A (MAP 1A) (Proliferation-related protein p80) [Contains: MAP1 light chain LC2]                                  |
| 3439 | UPI0000456839    | 2                    | 2              | 1.7                   | 2805   | 305697 | 4.9 | Microtubule-associated protein 1A (MAP 1A) (Proliferation-related protein p80) [Contains: MAP1 light chain LC2].                                 |
| 3439 | UPI000066D92C    | 2                    | 2              | 1.5                   | 3041   | 331259 | 4.9 | Microtubule-associated protein 1A (MAP 1A) (Proliferation-related protein p80) [Contains: MAP1 light chain LC2].                                 |
| 3440 | Q59ER0           | 2                    | 5              | 2.2                   | 1138   | 130427 | 6.4 | Rho GTPase activating protein 5 variant                                                                                                          |
| 3440 | Q05BU8           | 2                    | 5              | 2.1                   | 1189   | 136660 | 6.7 | Hypothetical protein                                                                                                                             |
| 3440 | Q05BE8           | 2                    | 5              | 1.7                   | 1502   | 172429 | 6.7 | ARHGAP5 protein                                                                                                                                  |
| 3440 | UPI000057B85C    | 2                    | 5              | 1.7                   | 1502   | 172459 | 6.6 | Rho GTPase activating protein 5 isoform a                                                                                                        |
| 3440 | UPI000057B85B    | 2                    | 5              | 1.7                   | 1501   | 172331 | 6.6 | Rho GTPase activating protein 5 isoform b                                                                                                        |
| 3440 | Q13017           | 2                    | 5              | 1.7                   | 1499   | 171568 | 6.6 | Rho GTPase-activating protein 5                                                                                                                  |
| 3441 | Q14139           | 2                    | 2              | 1.7                   | 1066   | 122560 | 5.2 | Ubiquitin conjugation factor E4 A                                                                                                                |
| 3441 | Q14139-2         | 2                    | 2              | 1.7                   | 1073   | 123522 | 5.2 | Isoform 2 of Q14139                                                                                                                              |
| 3442 | Q76L82           | 2                    | 2              | 1.7                   | 1536   | 164641 | 5.9 | Polycomb group protein                                                                                                                           |
| 3442 | UPI0000D61064    | 2                    | 2              | 1.7                   | 1539   | 165119 | 6   | Putative Polycomb group protein ASXL1 (Additional sex combs-like protein 1).                                                                     |
| 3443 | Q9H9N7           | 2                    | 2              | 2                     | 938    | 104155 | 7.8 | CDNA FLJ12634 fis, clone NT2RM4001858, weakly similar to T-BOX CONTAINING PROTEIN TBX6L                                                          |
| 3443 | Q8IW19           | 2                    | 2              | 1.7                   | 1139   | 126801 | 8.3 | MAX gene-associated protein                                                                                                                      |
| 3443 | UPI0000DD82F4    | 2                    | 2              | 0.6                   | 3033   | 332646 | 6.8 | PREDICTED: similar to MAX-interacting protein isoform 5                                                                                          |
| 3443 | UPI0000DD82F3    | 2                    | 2              | 0.6                   | 3114   | 341349 | 7.1 | PREDICTED: similar to MAX-interacting protein isoform 6                                                                                          |
| 3443 | UPI0000DD82A0    | 2                    | 2              | 0.6                   | 3033   | 332660 | 6.8 | PREDICTED: similar to MAX-interacting protein isoform 4                                                                                          |
| 3443 | UPI0000DBEE61    | 2                    | 2              | 0.6                   | 3026   | 331836 | 6.8 | MAX gene associated (MGA), mRNA                                                                                                                  |
| 3443 | UPI00001D7772    | 2                    | 2              | 0.6                   | 3114   | 341363 | 7.1 | MAX dimerization protein 5                                                                                                                       |
| 3444 | A2A3B8           | 2                    | 3              | 1.6                   | 1123   | 128993 | 7.2 | Diaphanous homolog 3                                                                                                                             |
| 3444 | UPI0000D61A7B    | 2                    | 3              | 1.6                   | 1110   | 127642 | 6.9 | Protein diaphanous homolog 3 (Diaphanous-related formin-3) (DRF3).                                                                               |
| 3444 | UPI0000D61A7A    | 2                    | 3              | 1.6                   | 1112   | 127857 | 6.9 | Protein diaphanous homolog 3 (Diaphanous-related formin-3) (DRF3).                                                                               |
| 3444 | Q9NSV4           | 2                    | 3              | 1.6                   | 1110   | 127594 | 6.9 | Protein diaphanous homolog 3                                                                                                                     |
| 3444 | Q3ZK23           | 2                    | 3              | 1.6                   | 1152   | 132402 | 6.8 | Diaphanous homolog 3                                                                                                                             |
| 3444 | Q2KPB6           | 2                    | 3              | 1.6                   | 1112   | 127856 | 6.9 | Diaphanous-related formin 3                                                                                                                      |
| 3444 | Q18P99           | 2                    | 3              | 1.6                   | 1123   | 128921 | 7.3 | Mammalian diaphanous homologue 2_splice_variant2                                                                                                 |
| 3444 | A2A3B9           | 2                    | 3              | 1.6                   | 1147   | 131486 | 7.1 | Diaphanous homolog 3                                                                                                                             |
| 3444 | Q5JTP8           | 2                    | 3              | 1.5                   | 1182   | 135615 | 7.1 | Diaphanous homolog 3                                                                                                                             |
| 3444 | A2A3C0           | 2                    | 3              | 1.5                   | 1193   | 136926 | 7   | Diaphanous homolog 3                                                                                                                             |

| No.  | Accession Number | Unique Peptide Count | Spectrum Count | Sequence Coverage (%) | Length | MolWt  | pI  | Descriptive Name                                                                                         |
|------|------------------|----------------------|----------------|-----------------------|--------|--------|-----|----------------------------------------------------------------------------------------------------------|
| 3445 | P01023           | 2                    | 2              | 1.6                   | 1474   | 163277 | 6.4 | Alpha-2-macroglobulin precursor                                                                          |
| 3445 | UPI00004565D0    | 2                    | 2              | 1.6                   | 1474   | 163237 | 6.5 | Alpha-2-macroglobulin precursor (Alpha-2-M).                                                             |
| 3445 | UPI0000155718    | 2                    | 2              | 1.6                   | 1474   | 163291 | 6.4 | alpha-2-macroglobulin precursor                                                                          |
| 3446 | P39880-5         | 2                    | 3              | 1.7                   | 1449   | 157980 | 5.8 | Isoform 6 of P39880                                                                                      |
| 3446 | P39880           | 2                    | 3              | 1.6                   | 1505   | 164272 | 6   | Homeobox protein cut-like 1                                                                              |
| 3446 | UPI00004575CB    | 2                    | 3              | 1.6                   | 1494   | 163149 | 5.8 | Protein CASP.                                                                                            |
| 3446 | UPI0000246CDF    | 2                    | 3              | 1.6                   | 1505   | 164187 | 5.9 | Protein CASP.                                                                                            |
| 3446 | UPI00001A95D7    | 2                    | 3              | 1.6                   | 1505   | 164312 | 6   | CCAAT displacement protein isoform a                                                                     |
| 3446 | P39880-3         | 2                    | 3              | 1.6                   | 1516   | 165687 | 5.9 | Isoform 3 of P39880                                                                                      |
| 3446 | P39880-2         | 2                    | 3              | 1.6                   | 1483   | 161734 | 5.9 | Isoform 2 of P39880                                                                                      |
| 3447 | Q5JVPV5          | 2                    | 6              | 1.9                   | 1501   | 169350 | 6.3 | Myeloid/lymphoid or mixed-lineage leukemia (Trithorax homolog, Drosophila); translocated to, 4           |
| 3447 | UPI0000711FD9    | 2                    | 6              | 1.8                   | 1651   | 187671 | 6.5 | myeloid/lymphoid or mixed-lineage leukemia (trithorax homolog, Drosophila); translocated to, 4 isoform 2 |
| 3447 | Q5TIG7           | 2                    | 6              | 1.8                   | 1612   | 181998 | 6.5 | Myeloid/lymphoid or mixed-lineage leukemia (Trithorax homolog, Drosophila); translocated to, 4           |
| 3447 | Q59FP0           | 2                    | 6              | 1.8                   | 1639   | 186298 | 6.5 | Afadin variant                                                                                           |
| 3447 | P55196-2         | 2                    | 6              | 1.8                   | 1611   | 181899 | 6.5 | Isoform 1 of P55196                                                                                      |
| 3447 | UPI0000D61519    | 2                    | 6              | 1.7                   | 1665   | 189138 | 6.5 | Afadin (Protein AF-6).                                                                                   |
| 3447 | Q5TIG5           | 2                    | 6              | 1.7                   | 1665   | 189153 | 6.5 | Myeloid/lymphoid or mixed-lineage leukemia (Trithorax homolog, Drosophila); translocated to, 4           |
| 3447 | P55196-3         | 2                    | 6              | 1.7                   | 1743   | 197652 | 6.5 | Isoform 3 of P55196                                                                                      |
| 3447 | P55196           | 2                    | 6              | 1.6                   | 1816   | 205604 | 6.8 | Afadin                                                                                                   |
| 3447 | UPI0000D61518    | 2                    | 6              | 1.6                   | 1824   | 206788 | 6.5 | Afadin (Protein AF-6).                                                                                   |
| 3447 | UPI00004574E7    | 2                    | 6              | 1.6                   | 1816   | 205589 | 6.8 | Afadin (Protein AF-6).                                                                                   |
| 3447 | P55196-4         | 2                    | 6              | 1.6                   | 1824   | 206803 | 6.5 | Isoform 4 of P55196                                                                                      |
| 3448 | Q5QD01           | 2                    | 3              | 1.6                   | 1581   | 180550 | 5.9 | SP-A receptor subunit SP-R210 alphaS                                                                     |
| 3448 | Q92614-5         | 2                    | 3              | 1.6                   | 1581   | 180494 | 5.9 | Isoform 5 of Q92614                                                                                      |
| 3448 | Q92614-2         | 2                    | 3              | 1.5                   | 1723   | 196436 | 5.9 | Isoform 2 of Q92614                                                                                      |
| 3448 | UPI0000456A6A    | 2                    | 3              | 1.3                   | 2005   | 227119 | 6.2 | TGFB1-induced anti-apoptotic factor 1 (12 kDa TGF-beta1-induced antiapoptotic factor).                   |
| 3448 | UPI0000456A69    | 2                    | 3              | 1.3                   | 2057   | 233545 | 6.4 | TGFB1-induced anti-apoptotic factor 1 (12 kDa TGF-beta1-induced antiapoptotic factor).                   |
| 3448 | UPI0000456A68    | 2                    | 3              | 1.3                   | 2042   | 231669 | 6.2 | TGFB1-induced anti-apoptotic factor 1 (12 kDa TGF-beta1-induced antiapoptotic factor).                   |
| 3448 | Q92614-4         | 2                    | 3              | 1.3                   | 2039   | 231238 | 6.2 | Isoform 4 of Q92614                                                                                      |
| 3448 | Q92614-3         | 2                    | 3              | 1.3                   | 2002   | 226688 | 6.2 | Isoform 3 of Q92614                                                                                      |
| 3448 | Q92614           | 2                    | 3              | 1.3                   | 2054   | 233113 | 6.3 | Myosin-XVIIIa                                                                                            |
| 3449 | Q6WKZ4           | 2                    | 2              | 1.6                   | 1283   | 137195 | 5.5 | Rab11 family-interacting protein 1                                                                       |
| 3449 | UPI0000D624B1    | 2                    | 2              | 1.6                   | 1283   | 137167 | 5.4 | Rab11 family-interacting protein 1 (Rab11-FIP1) (Rab-coupling protein).                                  |
| 3449 | UPI00003FF22E    | 2                    | 2              | 1.6                   | 1283   | 137165 | 5.4 | RAB11 family interacting protein 1 isoform 3                                                             |
| 3450 | Q8WY21           | 2                    | 2              | 1.6                   | 1168   | 129635 | 7.6 | VPS10 domain-containing receptor SorCS1 precursor                                                        |
| 3450 | Q8WY21-4         | 2                    | 2              | 1.6                   | 1159   | 129141 | 7.1 | Isoform 4 of Q8WY21                                                                                      |
| 3450 | Q8WY21-3         | 2                    | 2              | 1.6                   | 1179   | 131327 | 7.1 | Isoform 3 of Q8WY21                                                                                      |
| 3450 | Q8WY21-2         | 2                    | 2              | 1.6                   | 1198   | 133373 | 7   | Isoform 2 of Q8WY21                                                                                      |
| 3451 | Q9Y2H0           | 2                    | 2              | 1.6                   | 989    | 107567 | 7.3 | Disks large-associated protein 4                                                                         |
| 3451 | Q9Y2H0-2         | 2                    | 2              | 1.6                   | 992    | 108012 | 7.1 | Isoform 2 of Q9Y2H0                                                                                      |
| 3452 | O94822           | 2                    | 2              | 1.5                   | 1766   | 200533 | 6.3 | Zinc finger protein 294                                                                                  |
| 3452 | UPI0000D62531    | 2                    | 2              | 1.5                   | 1769   | 200863 | 6.3 | Zinc finger protein 294 (RING finger protein 160).                                                       |
| 3452 | UPI00001A95E0    | 2                    | 2              | 1.5                   | 1766   | 200550 | 6.3 | zinc finger protein 294                                                                                  |
| 3453 | Q6AHX6           | 2                    | 9              | 1.5                   | 1365   | 152964 | 7.9 | Structural maintenance of chromosomes flexible hinge domain-containing protein 1                         |
| 3453 | UPI0000D60EB0    | 2                    | 9              | 1.5                   | 1365   | 152892 | 7.9 | CDNA FLJ44350 fis, clone TRACH3006228.                                                                   |
| 3454 | P55268           | 2                    | 2              | 1.4                   | 1798   | 196079 | 6.5 | Laminin subunit beta-2 precursor                                                                         |
| 3454 | UPI000013EA62    | 2                    | 2              | 1.4                   | 1798   | 195980 | 6.5 | laminin, beta 2 precursor                                                                                |
| 3455 | Q8NC11           | 2                    | 6              | 1.5                   | 1106   | 124720 | 5.4 | CDNA FLJ90238 fis, clone NT2RM2000632, weakly similar to EXCISION REPAIR PROTEIN ERCC-6                  |
| 3455 | Q2NKK8           | 2                    | 6              | 1.4                   | 1250   | 141103 | 5.3 | FLJ20105 protein                                                                                         |
| 3456 | Q9P2K8           | 2                    | 3              | 1.4                   | 1649   | 186837 | 6.3 | Eukaryotic translation initiation factor 2-alpha kinase 4                                                |
| 3456 | UPI0000D61316    | 2                    | 3              | 1.4                   | 1621   | 183744 | 6.4 | Eukaryotic translation initiation factor 2-alpha kinase 4 (EC 2.7.11.1) (GCN2-like protein).             |
| 3456 | UPI0000D61315    | 2                    | 3              | 1.4                   | 1649   | 186937 | 6.3 | Eukaryotic translation initiation factor 2-alpha kinase 4 (EC 2.7.11.1) (GCN2-like protein).             |
| 3456 | UPI0000160791    | 2                    | 3              | 1.4                   | 1649   | 186909 | 6.3 | eukaryotic translation initiation factor 2 alpha kinase 4                                                |
| 3456 | Q9P2K8-2         | 2                    | 3              | 1.4                   | 1621   | 183644 | 6.5 | Isoform 2 of Q9P2K8                                                                                      |
| 3457 | A1LOR6           | 2                    | 8              | 1.3                   | 1553   | 176565 | 6.9 | FRYL protein                                                                                             |
| 3457 | O94915           | 2                    | 8              | 0.7                   | 3013   | 339598 | 5.6 | Protein furry homolog-like                                                                               |
| 3458 | Q9UF42           | 2                    | 16             | 2                     | 1031   | 115311 | 7.7 | Hypothetical protein DKFZp434F0621                                                                       |
| 3458 | A1L4N4           | 2                    | 16             | 1.3                   | 1672   | 185545 | 6.8 | KIDINS220 protein                                                                                        |
| 3458 | Q9ULH0           | 2                    | 16             | 1.2                   | 1777   | 197210 | 6.7 | KIAA1250 protein                                                                                         |
| 3459 | O15031           | 2                    | 2              | 1.3                   | 1838   | 205126 | 6.2 | Plexin-B2 precursor                                                                                      |
| 3460 | O60885-2         | 2                    | 3              | 2.5                   | 722    | 80463  | 8.6 | Isoform 2 of O60885                                                                                      |
| 3460 | Q4G0X8           | 2                    | 3              | 2.3                   | 794    | 88289  | 8.4 | BRD4 protein                                                                                             |
| 3460 | O60885           | 2                    | 3              | 1.3                   | 1362   | 152218 | 9.2 | Bromodomain-containing protein 4                                                                         |

| No.  | Accession Number | Unique Peptide Count | Spectrum Count | Sequence Coverage (%) | Length | MolWt  | pI   | Descriptive Name                                                                                                                                                                                                                                                                                                                 |
|------|------------------|----------------------|----------------|-----------------------|--------|--------|------|----------------------------------------------------------------------------------------------------------------------------------------------------------------------------------------------------------------------------------------------------------------------------------------------------------------------------------|
| 3460 | Q86YS8           | 2                    | 3              | 1                     | 1846   | 200087 | 6.4  | BRD4-NUT fusion oncoprotein                                                                                                                                                                                                                                                                                                      |
| 3461 | Q4G1H2           | 2                    | 2              | 1.7                   | 1062   | 124482 | 10.4 | Abnormal spindle-like microcephaly associated splice variant 3                                                                                                                                                                                                                                                                   |
| 3461 | Q5VYL4           | 2                    | 2              | 1.6                   | 1142   | 133558 | 9.9  | Asp (Abnormal spindle) homolog, microcephaly associated                                                                                                                                                                                                                                                                          |
| 3461 | Q4G1H0           | 2                    | 2              | 1.3                   | 1389   | 164947 | 10.9 | Abnormal spindle-like microcephaly associated splice variant 2                                                                                                                                                                                                                                                                   |
| 3461 | UPI0000D6206D    | 2                    | 2              | 1.3                   | 1389   | 164902 | 10.8 | Abnormal spindle-like microcephaly-associated protein (Abnormal spindle protein homolog) (Asp homolog).                                                                                                                                                                                                                          |
| 3461 | Q4G1H1           | 2                    | 2              | 1                     | 1892   | 217792 | 9.8  | Abnormal spindle-like microcephaly associated splice variant 1                                                                                                                                                                                                                                                                   |
| 3461 | UPI0000D6206B    | 2                    | 2              | 0.5                   | 3479   | 409972 | 10.4 | Abnormal spindle-like microcephaly-associated protein (Abnormal spindle protein homolog) (Asp homolog).                                                                                                                                                                                                                          |
| 3461 | Q8IZT6           | 2                    | 2              | 0.5                   | 3477   | 409803 | 10.4 | Abnormal spindle-like microcephaly-associated protein                                                                                                                                                                                                                                                                            |
| 3461 | Q5VYL3           | 2                    | 2              | 0.5                   | 3477   | 409801 | 10.4 | Asp (Abnormal spindle) homolog, microcephaly associated                                                                                                                                                                                                                                                                          |
| 3462 | Q8IWW8           | 2                    | 2              | 1.3                   | 1755   | 200537 | 6.2  | E3 ubiquitin-protein ligase UBR2                                                                                                                                                                                                                                                                                                 |
| 3462 | Q8IWW8-4         | 2                    | 2              | 1.3                   | 1755   | 200539 | 6.2  | Isoform 4 of Q8IWW8                                                                                                                                                                                                                                                                                                              |
| 3463 | Q68CP7           | 2                    | 3              | 1.5                   | 1215   | 134927 | 6.6  | Hypothetical protein DKFZp781G125                                                                                                                                                                                                                                                                                                |
| 3463 | UPI000059D323    | 2                    | 3              | 1.3                   | 1416   | 158948 | 7.4  | ATP-binding cassette, sub-family C, member 1 isoform 4                                                                                                                                                                                                                                                                           |
| 3463 | UPI000013D386    | 2                    | 3              | 1.3                   | 1400   | 157240 | 7.5  | Multidrug resistance-associated protein 1 (ATP-binding cassette sub- family C member 1) (Leukotriene C(4) transporter) (LTC4 transporter).                                                                                                                                                                                       |
| 3463 | Q9UQ98           | 2                    | 3              | 1.3                   | 1400   | 157210 | 7.5  | Multidrug resistance protein                                                                                                                                                                                                                                                                                                     |
| 3463 | P33527-8         | 2                    | 3              | 1.3                   | 1351   | 151631 | 7.6  | Isoform 8 of P33527                                                                                                                                                                                                                                                                                                              |
| 3463 | P33527-7         | 2                    | 3              | 1.3                   | 1410   | 158251 | 7.1  | Isoform 7 of P33527                                                                                                                                                                                                                                                                                                              |
| 3463 | P33527-6         | 2                    | 3              | 1.3                   | 1407   | 157652 | 7.8  | Isoform 6 of P33527                                                                                                                                                                                                                                                                                                              |
| 3463 | A3RJX2           | 2                    | 3              | 1.2                   | 1531   | 171590 | 7.1  | ATP-binding cassette, sub-family C (CFTR/MRP), member 1                                                                                                                                                                                                                                                                          |
| 3463 | UPI000059D326    | 2                    | 3              | 1.2                   | 1472   | 164970 | 7.6  | ATP-binding cassette, sub-family C, member 1 isoform 2                                                                                                                                                                                                                                                                           |
| 3463 | UPI000059D325    | 2                    | 3              | 1.2                   | 1466   | 164303 | 7.3  | ATP-binding cassette, sub-family C, member 1 isoform 5                                                                                                                                                                                                                                                                           |
| 3463 | UPI00004091AF    | 2                    | 3              | 1.2                   | 1475   | 165569 | 6.9  | ATP-binding cassette, sub-family C, member 1 isoform 3                                                                                                                                                                                                                                                                           |
| 3463 | UPI00001604C7    | 2                    | 3              | 1.2                   | 1482   | 166166 | 7.3  | ATP-binding cassette, sub-family C, member 1 isoform 7                                                                                                                                                                                                                                                                           |
| 3463 | UPI00001604C6    | 2                    | 3              | 1.2                   | 1489   | 166653 | 7.4  | ATP-binding cassette, sub-family C, member 1 isoform 6                                                                                                                                                                                                                                                                           |
| 3463 | UPI000013D385    | 2                    | 3              | 1.2                   | 1473   | 164975 | 7.6  | Multidrug resistance-associated protein 1 (ATP-binding cassette sub- family C member 1) (Leukotriene C(4) transporter) (LTC4 transporter).                                                                                                                                                                                       |
| 3463 | UPI000013D384    | 2                    | 3              | 1.2                   | 1456   | 163262 | 7.7  | Multidrug resistance-associated protein 1 (ATP-binding cassette sub- family C member 1) (Leukotriene C(4) transporter) (LTC4 transporter).                                                                                                                                                                                       |
| 3463 | UPI000013D383    | 2                    | 3              | 1.2                   | 1459   | 163861 | 7    | Multidrug resistance-associated protein 1 (ATP-binding cassette sub- family C member 1) (Leukotriene C(4) transporter) (LTC4 transporter).                                                                                                                                                                                       |
| 3463 | UPI000013D382    | 2                    | 3              | 1.2                   | 1466   | 164488 | 7.4  | Multidrug resistance-associated protein 1 (ATP-binding cassette sub- family C member 1) (Leukotriene C(4) transporter) (LTC4 transporter).                                                                                                                                                                                       |
| 3463 | UPI000013D381    | 2                    | 3              | 1.2                   | 1450   | 162595 | 7.4  | Multidrug resistance-associated protein 1 (ATP-binding cassette sub- family C member 1) (Leukotriene C(4) transporter) (LTC4 transporter).                                                                                                                                                                                       |
| 3463 | UPI000013D380    | 2                    | 3              | 1.2                   | 1515   | 169882 | 7.2  | Multidrug resistance-associated protein 1 (ATP-binding cassette sub- family C member 1) (Leukotriene C(4) transporter) (LTC4 transporter).                                                                                                                                                                                       |
| 3463 | P33527-9         | 2                    | 3              | 1.2                   | 1541   | 172609 | 6.8  | Isoform 9 of P33527                                                                                                                                                                                                                                                                                                              |
| 3463 | P33527-4         | 2                    | 3              | 1.2                   | 1466   | 164273 | 7.3  | Isoform 4 of P33527                                                                                                                                                                                                                                                                                                              |
| 3463 | P33527-3         | 2                    | 3              | 1.2                   | 1475   | 165538 | 6.9  | Isoform 3 of P33527                                                                                                                                                                                                                                                                                                              |
| 3463 | P33527-2         | 2                    | 3              | 1.2                   | 1472   | 164940 | 7.6  | Isoform 2 of P33527                                                                                                                                                                                                                                                                                                              |
| 3463 | P33527           | 2                    | 3              | 1.2                   | 1531   | 171560 | 7.1  | Multidrug resistance-associated protein 1 (ATP-binding cassette sub- family C member 1) (Leukotriene C(4) transporter)                                                                                                                                                                                                           |
| 3464 | Q7Z3Z5           | 2                    | 2              | 1.2                   | 2027   | 226321 | 6.8  | TNRC11 protein                                                                                                                                                                                                                                                                                                                   |
| 3464 | UPI0000457852    | 2                    | 2              | 1.1                   | 2188   | 244357 | 7.2  | Mediator of RNA polymerase II transcription subunit 12 (Thyroid hormone receptor-associated protein complex 230 kDa component) (Trap230) (Activator-recruited cofactor 240 kDa component) (ARC240) (CAG repeat protein 45) (OPA-containing protein) (Trinucleot mediator of RNA polymerase II transcription, subunit 12 homolog) |
| 3464 | UPI00004257E2    | 2                    | 2              | 1.1                   | 2177   | 243079 | 7.1  | mediator of RNA polymerase II transcription, subunit 12 homolog                                                                                                                                                                                                                                                                  |

| No.  | Accession Number | Unique Peptide Count | Spectrum Count | Sequence Coverage (%) | Length | MolWt  | pI  | Descriptive Name                                                                                                                                                                                                                                                |
|------|------------------|----------------------|----------------|-----------------------|--------|--------|-----|-----------------------------------------------------------------------------------------------------------------------------------------------------------------------------------------------------------------------------------------------------------------|
| 3464 | UPI000021230F    | 2                    | 2              | 1.1                   | 2176   | 242950 | 7.1 | Mediator of RNA polymerase II transcription subunit 12 (Thyroid hormone receptor-associated protein complex 230 kDa component) (Trap230) (Activator-recruited cofactor 240 kDa component) (ARC240) (CAG repeat protein 45) (OPA-containing protein) (Trinucleot |
| 3464 | Q93074           | 2                    | 2              | 1.1                   | 2212   | 247331 | 7.4 | Mediator of RNA polymerase II transcription subunit 12                                                                                                                                                                                                          |
| 3465 | Q8IWY7           | 2                    | 3              | 1.2                   | 1649   | 182466 | 7   | Tau-tubulin kinase                                                                                                                                                                                                                                              |
| 3465 | UPI000049DD9     | 2                    | 3              | 1.2                   | 1651   | 182794 | 7   | Tau-tubulin kinase 2 (EC 2.7.11.1).                                                                                                                                                                                                                             |
| 3466 | Q96BY6           | 2                    | 6              | 1.2                   | 2183   | 249310 | 6.9 | Dedicator of cytokinesis protein 10                                                                                                                                                                                                                             |
| 3467 | Q6NX41           | 2                    | 2              | 3.7                   | 566    | 63641  | 9.1 | POLR2A protein                                                                                                                                                                                                                                                  |
| 3467 | P24928           | 2                    | 2              | 1.1                   | 1970   | 217204 | 7.4 | DNA-directed RNA polymerase II largest subunit                                                                                                                                                                                                                  |
| 3467 | UPI0000D622B7    | 2                    | 2              | 1.1                   | 1972   | 217430 | 7.4 | DNA-directed RNA polymerase II largest subunit (EC 2.7.7.6) (RPB1).                                                                                                                                                                                             |
| 3467 | UPI0000140EB9    | 2                    | 2              | 1.1                   | 1970   | 217174 | 7.4 | DNA-directed RNA polymerase II largest subunit (EC 2.7.7.6) (RPB1).                                                                                                                                                                                             |
| 3468 | Q86XA9           | 2                    | 2              | 1.1                   | 1778   | 193180 | 6.3 | Uncharacterized protein C14orf125                                                                                                                                                                                                                               |
| 3469 | UPI0000D61577    | 2                    | 2              | 3.4                   | 741    | 76632  | 4.8 | ankyrin repeat domain protein 17 isoform b                                                                                                                                                                                                                      |
| 3469 | Q86X13           | 2                    | 2              | 3.3                   | 751    | 77825  | 4.8 | ANKRD17 protein                                                                                                                                                                                                                                                 |
| 3469 | UPI0000457229    | 2                    | 2              | 2.2                   | 1161   | 122340 | 4.9 | ankyrin repeat domain protein 17 isoform b                                                                                                                                                                                                                      |
| 3469 | Q9H288           | 2                    | 2              | 2.1                   | 1188   | 125431 | 5   | Serologically defined breast cancer antigen NY-BR-16                                                                                                                                                                                                            |
| 3469 | UPI0000D61576    | 2                    | 2              | 1.7                   | 1500   | 159042 | 5.3 | ankyrin repeat domain protein 17 isoform b                                                                                                                                                                                                                      |
| 3469 | Q6PKA2           | 2                    | 2              | 1.7                   | 1500   | 158854 | 5.5 | ANKRD17 protein                                                                                                                                                                                                                                                 |
| 3469 | UPI0000D61575    | 2                    | 2              | 1.1                   | 2358   | 247568 | 6.8 | ankyrin repeat domain protein 17 isoform b                                                                                                                                                                                                                      |
| 3469 | UPI00002263B1    | 2                    | 2              | 1.1                   | 2352   | 246748 | 6.7 | ankyrin repeat domain protein 17 isoform b                                                                                                                                                                                                                      |
| 3469 | Q75179           | 2                    | 2              | 1                     | 2486   | 263242 | 6.4 | Ankyrin repeat domain-containing protein 17                                                                                                                                                                                                                     |
| 3469 | UPI0000D61574    | 2                    | 2              | 1                     | 2609   | 275076 | 6.6 | ankyrin repeat domain protein 17 isoform b                                                                                                                                                                                                                      |
| 3469 | UPI00002263B0    | 2                    | 2              | 1                     | 2603   | 274256 | 6.5 | ankyrin repeat domain protein 17 isoform a                                                                                                                                                                                                                      |
| 3470 | Q04721           | 2                    | 2              | 1                     | 2471   | 265403 | 5.1 | Neurogenic locus notch homolog protein 2 precursor (Notch 2) (hN2) [Contains: Notch 2 extracellular truncation; Notch 2 intracellular domain]                                                                                                                   |
| 3471 | UPI0000DD79AC    | 2                    | 7              | 1.3                   | 1797   | 186653 | 7.9 | PREDICTED: similar to filaggrin 2                                                                                                                                                                                                                               |
| 3471 | Q5D862           | 2                    | 7              | 1                     | 2391   | 248072 | 8.3 | Ifaporsiasin                                                                                                                                                                                                                                                    |
| 3472 | Q2TAZ4           | 2                    | 2              | 2.4                   | 788    | 85874  | 5   | MDC1 protein                                                                                                                                                                                                                                                    |
| 3472 | UPI0000D6113B    | 2                    | 2              | 1                     | 1825   | 197569 | 5.7 | UPI0000D6113B UniRef100 entry                                                                                                                                                                                                                                   |
| 3472 | A2BF04           | 2                    | 2              | 0.9                   | 2089   | 226606 | 5.5 | Mediator of DNA damage checkpoint 1                                                                                                                                                                                                                             |
| 3472 | UPI00004A3B34    | 2                    | 2              | 0.9                   | 2089   | 226636 | 5.5 | UPI00004A3B34 UniRef100 entry                                                                                                                                                                                                                                   |
| 3472 | Q14676           | 2                    | 2              | 0.9                   | 2089   | 226664 | 5.5 | Mediator of DNA damage checkpoint protein 1                                                                                                                                                                                                                     |
| 3472 | Q0EFC2           | 2                    | 2              | 0.9                   | 2089   | 226680 | 5.5 | KIAA0170 protein                                                                                                                                                                                                                                                |
| 3473 | UPI0000D60F33    | 2                    | 3              | 1.2                   | 1788   | 200772 | 7.1 | Supervillin (Archvillin) (p205/p250).                                                                                                                                                                                                                           |
| 3473 | UPI0000366679    | 2                    | 3              | 1.2                   | 1788   | 200846 | 6.9 | Supervillin (Archvillin) (p205/p250).                                                                                                                                                                                                                           |
| 3473 | UPI000006D31C    | 2                    | 3              | 1.2                   | 1788   | 200820 | 6.9 | supervillin isoform 1                                                                                                                                                                                                                                           |
| 3473 | Q95425-2         | 2                    | 3              | 1.2                   | 1788   | 200792 | 6.9 | Isoform 2 of Q95425                                                                                                                                                                                                                                             |
| 3473 | Q95425           | 2                    | 3              | 0.9                   | 2214   | 247704 | 7   | Supervillin                                                                                                                                                                                                                                                     |
| 3473 | UPI0000D60F34    | 2                    | 3              | 0.9                   | 2214   | 247670 | 7.1 | Supervillin (Archvillin) (p205/p250).                                                                                                                                                                                                                           |
| 3473 | UPI0000366678    | 2                    | 3              | 0.9                   | 2214   | 247744 | 7   | Supervillin (Archvillin) (p205/p250).                                                                                                                                                                                                                           |
| 3474 | UPI0000D6265A    | 2                    | 2              | 1.7                   | 1200   | 138256 | 8.7 | Myosin-7A (Myosin VIIa).                                                                                                                                                                                                                                        |
| 3474 | Q13402-4         | 2                    | 2              | 1.7                   | 1203   | 138689 | 8.6 | Isoform 4 of Q13402                                                                                                                                                                                                                                             |
| 3474 | Q13402-3         | 2                    | 2              | 1.7                   | 1200   | 138349 | 8.6 | Isoform 3 of Q13402                                                                                                                                                                                                                                             |
| 3474 | UPI000045654F    | 2                    | 2              | 1                     | 2095   | 240949 | 8.8 | Myosin-7A (Myosin VIIa).                                                                                                                                                                                                                                        |
| 3474 | Q13402-5         | 2                    | 2              | 1                     | 2092   | 240654 | 8.7 | Isoform 5 of Q13402                                                                                                                                                                                                                                             |
| 3474 | Q13402           | 2                    | 2              | 0.9                   | 2215   | 254404 | 8.6 | Myosin-VIIa                                                                                                                                                                                                                                                     |
| 3474 | UPI0000E445E2    | 2                    | 2              | 0.9                   | 2175   | 250243 | 8.6 | myosin VIIA                                                                                                                                                                                                                                                     |
| 3474 | UPI000045654E    | 2                    | 2              | 0.9                   | 2179   | 250212 | 8.5 | Myosin-7A (Myosin VIIa).                                                                                                                                                                                                                                        |
| 3474 | UPI000045654D    | 2                    | 2              | 0.9                   | 2186   | 251059 | 8.5 | Myosin-7A (Myosin VIIa).                                                                                                                                                                                                                                        |
| 3474 | UPI000045654C    | 2                    | 2              | 0.9                   | 2216   | 254483 | 8.6 | Myosin-7A (Myosin VIIa).                                                                                                                                                                                                                                        |
| 3474 | Q13402-7         | 2                    | 2              | 0.9                   | 2177   | 249975 | 8.4 | Isoform 7 of Q13402                                                                                                                                                                                                                                             |
| 3474 | Q13402-6         | 2                    | 2              | 0.9                   | 2185   | 250980 | 8.4 | Isoform 6 of Q13402                                                                                                                                                                                                                                             |
| 3474 | Q13402-2         | 2                    | 2              | 0.9                   | 2177   | 250486 | 8.6 | Isoform 2 of Q13402                                                                                                                                                                                                                                             |
| 3475 | UPI0000DD7998    | 2                    | 2              | 0.9                   | 2454   | 276735 | 6.3 | PREDICTED: similar to Ubiquitin carboxyl-terminal hydrolase 24 (Ubiquitin thioesterase 24) (Ubiquitin-specific-processing protease 24) (Deubiquitinating enzyme 24) isoform 5                                                                                   |
| 3475 | UPI0000DD78C2    | 2                    | 2              | 0.9                   | 2460   | 277414 | 6.3 | PREDICTED: similar to Ubiquitin carboxyl-terminal hydrolase 24 (Ubiquitin thioesterase 24) (Ubiquitin-specific-processing protease 24) (Deubiquitinating enzyme 24) isoform 1                                                                                   |
| 3475 | UPI000059CFDE    | 2                    | 2              | 0.8                   | 2620   | 294364 | 6.1 | Ubiquitin carboxyl-terminal hydrolase 24 (EC 3.1.2.15) (Ubiquitin thioesterase 24) (Ubiquitin-specific-processing protease 24) (Deubiquitinating enzyme 24).                                                                                                    |
| 3476 | P21359           | 2                    | 2              | 0.7                   | 2839   | 319372 | 7.4 | Neurofibromin (Neurofibromatosis-related protein NF-1) [Contains: Neurofibromin truncated]                                                                                                                                                                      |
| 3476 | P21359-2         | 2                    | 2              | 0.7                   | 2818   | 317032 | 7.3 | Isoform 1 of P21359                                                                                                                                                                                                                                             |
| 3477 | P42858           | 2                    | 2              | 0.7                   | 3144   | 347859 | 6.2 | Huntingtin                                                                                                                                                                                                                                                      |
| 3477 | UPI0000D61535    | 2                    | 2              | 0.7                   | 3142   | 347775 | 6.2 | Huntingtin (Huntington disease protein) (HD protein).                                                                                                                                                                                                           |
| 3477 | UPI000013D567    | 2                    | 2              | 0.7                   | 3142   | 347603 | 6.2 | Huntingtin (Huntington disease protein) (HD protein).                                                                                                                                                                                                           |

| No.  | Accession Number | Unique Peptide Count | Spectrum Count | Sequence Coverage (%) | Length | MolWt  | pI  | Descriptive Name                                                                               |
|------|------------------|----------------------|----------------|-----------------------|--------|--------|-----|------------------------------------------------------------------------------------------------|
| 3478 | Q7Z6C1           | 2                    | 2              | 1.1                   | 1553   | 170081 | 7.5 | Hypothetical protein                                                                           |
| 3478 | Q09472           | 2                    | 2              | 0.7                   | 2414   | 264140 | 8.5 | Histone acetyltransferase p300                                                                 |
| 3478 | Q5W1B6           | 2                    | 2              | 0.7                   | 2414   | 264158 | 8.5 | E1A binding protein p300                                                                       |
| 3479 | UPI0000DD847C    | 2                    | 2              | 0.7                   | 2769   | 295312 | 10  | PREDICTED: similar to BAH domain and coiled-coil containing 1                                  |
| 3480 | Q5MJ67           | 2                    | 2              | 0.6                   | 3345   | 379235 | 6.4 | Cardiomyopathy-associated protein 3                                                            |
| 3481 | P04114           | 2                    | 3              | 0.5                   | 4563   | 515569 | 7.1 | Apolipoprotein B-100 precursor (Apo B-100) [Contains: Apolipoprotein B-48 (Apo B-48)]          |
| 3481 | UPI0000D820D0    | 2                    | 3              | 0.5                   | 4563   | 515537 | 7   | apolipoprotein B precursor                                                                     |
| 3481 | UPI0000141B94    | 2                    | 3              | 0.5                   | 4563   | 515611 | 7   | Apolipoprotein B-100 precursor (Apo B-100) [Contains: Apolipoprotein B-48 (Apo B-48)].         |
| 3481 | Q4ZG63           | 2                    | 3              | 0.5                   | 3929   | 441771 | 7.5 | Hypothetical protein APOB                                                                      |
| 3482 | Q9NR09           | 2                    | 4              | 0.5                   | 4829   | 527615 | 6   | Baculoviral IAP repeat-containing protein 6                                                    |
| 3482 | UPI0000DBEF4D    | 2                    | 4              | 0.5                   | 4829   | 527615 | 6   | Baculoviral IAP repeat-containing protein 6 (Ubiquitin-conjugating BIR domain enzyme apollon). |
| 3482 | UPI00004EC29E    | 2                    | 4              | 0.5                   | 4829   | 527629 | 6   | baculoviral IAP repeat-containing 6                                                            |
| 3482 | UPI00004578FF    | 2                    | 4              | 0.5                   | 4829   | 527683 | 6.1 | Baculoviral IAP repeat-containing protein 6 (Ubiquitin-conjugating BIR domain enzyme apollon). |
| 3483 | Q9NZJ4           | 2                    | 2              | 0.5                   | 4579   | 521131 | 7   | Sacsin                                                                                         |
| 3483 | UPI0000D626BD    | 2                    | 2              | 0.5                   | 4576   | 520845 | 7   | Sacsin.                                                                                        |
| 3484 | Q96JB1           | 2                    | 3              | 0.4                   | 4490   | 514668 | 6.3 | Ciliary dynein heavy chain 8                                                                   |
| 3484 | UPI0000D626B6    | 2                    | 3              | 0.4                   | 4699   | 537743 | 6.2 | Ciliary dynein heavy chain 8 (Axonemal beta dynein heavy chain 8).                             |
| 3484 | Q96JB1-2         | 2                    | 3              | 0.4                   | 4454   | 510452 | 6.3 | Isoform 2 of Q96JB1                                                                            |
| 3485 | Q9Y6V0           | 2                    | 2              | 0.4                   | 5183   | 566666 | 6.5 | Protein piccolo                                                                                |
| 3485 | UPI0000DD87B8    | 2                    | 2              | 0.4                   | 5021   | 547665 | 6.3 | PREDICTED: similar to Protein piccolo (Aczonin) isoform 7                                      |
| 3485 | UPI0000DD87B7    | 2                    | 2              | 0.4                   | 5011   | 546724 | 6.3 | PREDICTED: similar to Protein piccolo (Aczonin) isoform 12                                     |
| 3485 | UPI0000DD87B6    | 2                    | 2              | 0.4                   | 5010   | 546565 | 6.3 | PREDICTED: similar to Protein piccolo (Aczonin) isoform 2                                      |
| 3485 | UPI0000DBEF4F    | 2                    | 2              | 0.4                   | 5039   | 550261 | 6.4 | PCL0_HUMAN Isoform 3 of Q9Y6V0 - Homo sapiens (Human)                                          |
| 3485 | UPI0000DBEF4E    | 2                    | 2              | 0.4                   | 5048   | 550881 | 6.4 | PCL0_HUMAN Isoform 3 of Q9Y6V0 - Homo sapiens (Human)                                          |
| 3485 | Q9Y6V0-2         | 2                    | 2              | 0.4                   | 4866   | 530973 | 6.3 | Isoform 2 of Q9Y6V0                                                                            |
| 3486 | UPI0000DD87BC    | 2                    | 34             | 0.3                   | 5048   | 534427 | 5.3 | PREDICTED: similar to AHNAK nucleoprotein isoform 1 isoform 1                                  |
